# Supplementary material for: Differential Affinity Chromatography Coupled to Mass Spectrometry: A Suitable Tool to Identify Common Binding Proteins of a Broad-Range Antimicrobial Peptide Derived from Leucinostatin
Source: MDPI journal article supplement (doi:10.3390/biomedicines10112675), 2022-10-23
Supplement: s1 [file s1]

Supplemental Figures

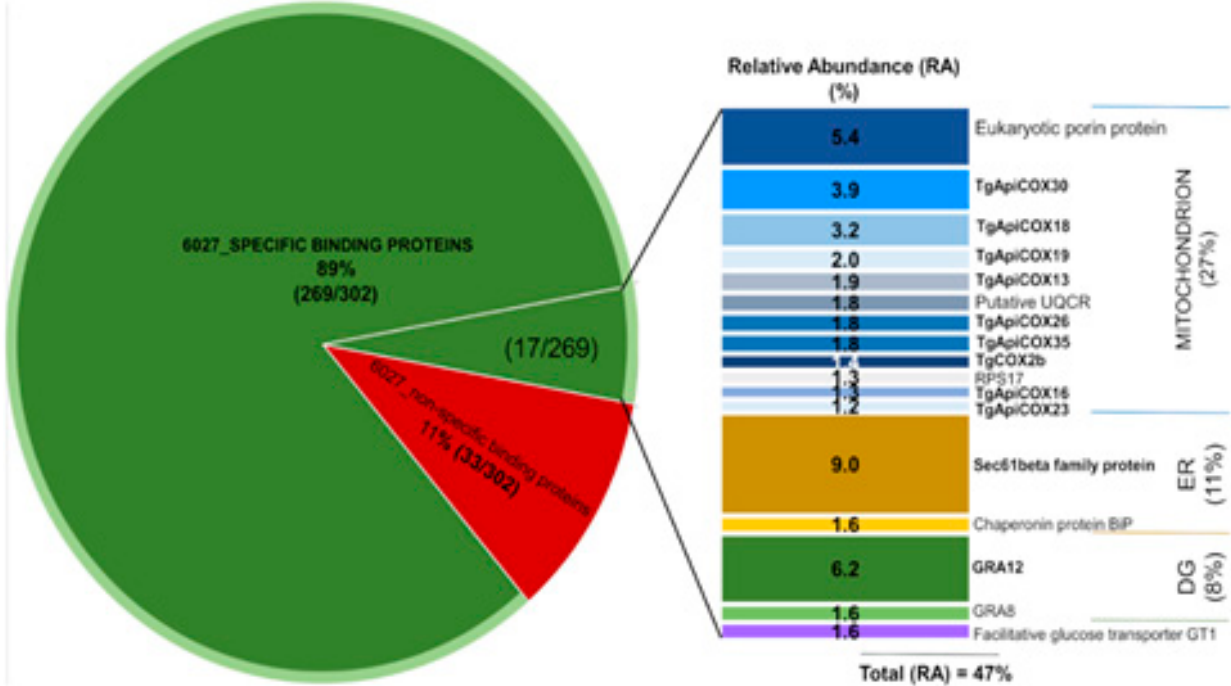

**Figure S1.** Schematic representation of the most abundant *T. gondii* peptide 6027-binding proteins. Three main clusters are identified that account for 47% relative abundance, assigned to mitochondrion, ER and GRA proteins.

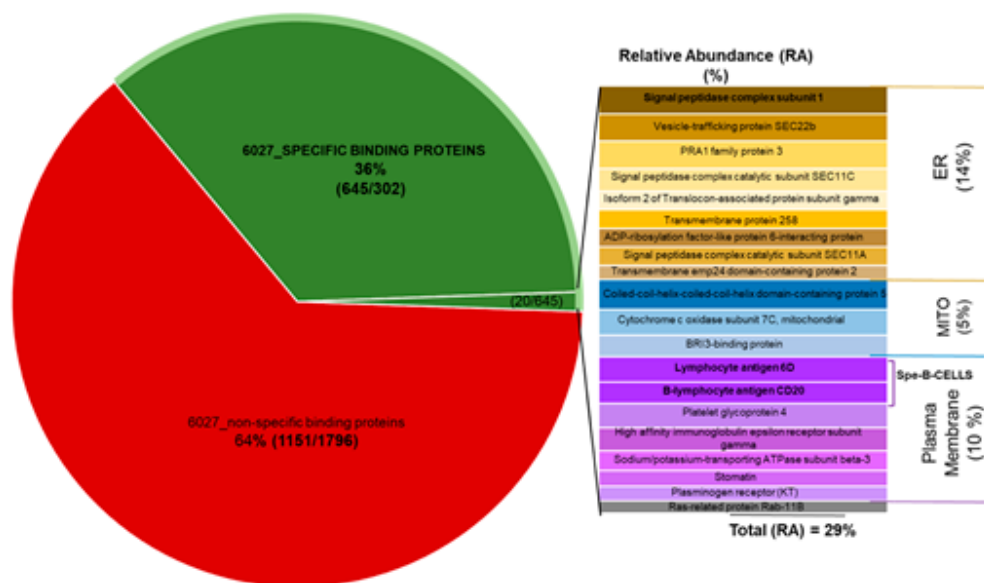

**Figure S2.** Schematic representation of the most abundant peptide 6027-binding proteins in murine spleen cell extracts. Three main clusters are identified that account for 29% relative abundance, and are assigned to mitochondrion, ER and GRA proteins.
