# Supplementary material for: Differential Affinity Chromatography Coupled to Mass Spectrometry: A Suitable Tool to Identify Common Binding Proteins of a Broad-Range Antimicrobial Peptide Derived from Leucinostatin
Source: Biomedicines. 2022 Oct 23;10(11):2675. doi: 10.3390/biomedicines10112675 (PMC9687860; doi:10.3390/biomedicines10112675)
Supplement: Supplementary file 1 [file biomedicines-10-02675-s001.zip]

Archive with 5 entries (5 files):
- Supplemental_figures.pdf
- TableS1.xlsx
- TableS2.xlsx
- TableS3.xlsx
- TableS4.xlsx
