# Supplementary material for: Differential Affinity Chromatography Coupled to Mass Spectrometry: A Suitable Tool to Identify Common Binding Proteins of a Broad-Range Antimicrobial Peptide Derived from Leucinostatin
Source: Biomedicines. 2022 Oct 23;10(11):2675. doi: 10.3390/biomedicines10112675 (PMC9687860; doi:10.3390/biomedicines10112675)
Supplement: Supplementary file 1 [file biomedicines-10-02675-s001.zip › TableS1.xlsx]

## Sheet: Table S1
Annotation	Majority protein IDs	Fasta headers	Number of proteins	Razor + unique peptides	Sequence coverage [%]	Mol. weight [kDa]	Sequence length	Q-value	Score	Num Ident byMSMS//byMatch S1_M	Num Ident byMSMS//byMatch S2_6027	Num Ident byMSMS//byMatch S3_21358	Intensity	iBAQ peptides	MS/MS count	Only identified by site	Potential contaminant	Taxonomy IDs	iBAQ	iBAQ S1_M	iBAQ S2_6027	iBAQ S3_21358	LFQ S1_M	LFQ S2_6027	LFQ S3_21358	Seen in no reps in S1_M	Seen in all reps in S1_M	Seen in no reps in S2_6027	Seen in all reps in S2_6027	Seen in no reps in S3_21358	Seen in all reps in S3_21358	OnOff S1_M vs S2_6027 onIn	OnOff S1_M vs S3_21358 onIn	OnOff S2_6027 vs S3_21358 onIn	Top3 S1_M	Top3 S2_6027	Top3 S3_21358	LFQ log2FC S2_6027 - S1_M	LFQ Prob quantile log2FC S2_6027 - S1_M	LFQ log2FC S3_21358 - S1_M	LFQ Prob quantile log2FC S3_21358 - S1_M	LFQ log2FC S3_21358 - S2_6027	LFQ Prob quantile log2FC S3_21358 - S2_6027	Top3 log2FC S2_6027 - S1_M	Top3 Prob quantile log2FC S2_6027 - S1_M	Top3 log2FC S3_21358 - S1_M	Top3 Prob quantile log2FC S3_21358 - S1_M	Top3 log2FC S3_21358 - S2_6027	Top3 Prob quantile log2FC S3_21358 - S2_6027
TGRH88_025740	KAF4643818.1	KAF4643818.1 | transcript=TGRH88_025740_t1 | gene=TGRH88_025740 | organism=Toxoplasma_gondii_RH-88 | gene_product=dense granule protein GRA5 | transcript_product=dense granule protein GRA5 | location=CM023086:1858308-1858670(+) | protein_length=120 | seque	1	8	63.3	12.976	120	0	323.31	1//0	1//0	1//0	974920000	7	47			-1	139270000	7259100	132020000		900990000	538320000		FALSE	TRUE	FALSE	TRUE	FALSE	TRUE				1.69688e+08	1.58412e+08	0	-0.743047	0.256410256410256					-0.0992012	0.463414634146341
TGRH88_057170	KAF4638108.1	KAF4638108.1 | transcript=TGRH88_057170_t1 | gene=TGRH88_057170 | organism=Toxoplasma_gondii_RH-88 | gene_product=histone H2AZ | transcript_product=histone H2AZ | location=CM023093:151493-153231(-) | protein_length=155 | sequence_SO=chromosome | SO=protein	2	5	44.5	15.92	155	0	323.31	1//0	1//0	1//0	699780000	6	31			-1;-1	116630000	10353000	104350000	1927100	678640000	633190000	72760000	FALSE	TRUE	FALSE	TRUE	FALSE	TRUE				2.15558e+08	1.15176e+08	1.75536e+07	-0.100008	0.333333333333333	-3.22143	0.133333333333333	-3.12142	0.263157894736842	-0.90424	0.24390243902439	-3.61824	0.2	-2.714	0.142857142857143
TGRH88_008910	KAF4645075.1	KAF4645075.1 | transcript=TGRH88_008910_t1 | gene=TGRH88_008910 | organism=Toxoplasma_gondii_RH-88 | gene_product=Sec61beta family protein | transcript_product=Sec61beta family protein | location=CM023085:1977729-1979456(+) | protein_length=99 | sequence_S	1	6	57.6	10.103	99	0	323.31	0//0	1//0	0//0	523710000	6	17			-1	87285000		87285000			503830000		TRUE	FALSE	FALSE	TRUE	TRUE	FALSE	S2_6027		S2_6027		9.27083e+07
TGRH88_046790	KAF4640753.1	KAF4640753.1 | transcript=TGRH88_046790_t1 | gene=TGRH88_046790 | organism=Toxoplasma_gondii_RH-88 | gene_product=dense granule protein GRA3 | transcript_product=dense granule protein GRA3 | location=CM023091:6523258-6523926(+) | protein_length=222 | seque	1	12	36.5	24.242	222	0	323.31	0//0	1//0	1//0	586040000	8	51			-1	73255000		73134000	120730		560440000	8231200	TRUE	FALSE	FALSE	TRUE	FALSE	TRUE	S2_6027	S3_21358			6.00801e+07	1.46628e+06					-6.08931	0.0526315789473684					-5.35666	0.0476190476190476
TGRH88_037360	KAF4643007.1	KAF4643007.1 | transcript=TGRH88_037360_t1 | gene=TGRH88_037360 | organism=Toxoplasma_gondii_RH-88 | gene_product=unspecified product | transcript_product=unspecified product | location=CM023088:4005133-4005459(-) | protein_length=108 | sequence_SO=chromos	1	4	42.6	11.329	108	0	323.31	1//0	1//0	0//0	187080000	3	14			-1	62361000	604100	61757000		25472000	174240000		FALSE	TRUE	FALSE	TRUE	TRUE	FALSE		S1_M	S2_6027	6.28899e+06	3.3525e+07		2.77409	0.82051282051282					2.41433	0.951219512195122
TGRH88_013490	KAF4644356.1	KAF4644356.1 | transcript=TGRH88_013490_t1 | gene=TGRH88_013490 | organism=Toxoplasma_gondii_RH-88 | gene_product=dense granule protein GRA12 | transcript_product=dense granule protein GRA12 | location=CM023090:2723353-2725146(-) | protein_length=436 | seq	1	26	64	47.912	436	0	323.31	0//0	1//0	0//0	1197000000	20	110			-1	59851000		59851000			1155600000		TRUE	FALSE	FALSE	TRUE	TRUE	FALSE	S2_6027		S2_6027		8.70038e+07
TGRH88_035710	KAF4642843.1	KAF4642843.1 | transcript=TGRH88_035710_t1 | gene=TGRH88_035710 | organism=Toxoplasma_gondii_RH-88 | gene_product=dense granule protein GRA7 | transcript_product=dense granule protein GRA7 | location=CM023088:2697725-2698435(+) | protein_length=236 | seque	1	13	70.8	25.857	236	0	323.31	1//0	1//0	0//0	467900000	8	70			-1	58487000	1960200	56527000		187600000	424180000		FALSE	TRUE	FALSE	TRUE	TRUE	FALSE		S1_M	S2_6027	5.44196e+07	4.23994e+07		1.17702	0.487179487179487					-0.36008	0.390243902439024
TGRH88_067710	KAF4640963.1	KAF4640963.1 | transcript=TGRH88_067710_t1 | gene=TGRH88_067710 | organism=Toxoplasma_gondii_RH-88 | gene_product=eukaryotic porin protein | transcript_product=eukaryotic porin protein | location=CM023089:657082-660805(-) | protein_length=290 | sequence_SO	1	23	77.6	31.352	290	0	323.31	0//0	1//0	0//0	894050000	17	70			-1	52591000		52591000			863010000		TRUE	FALSE	FALSE	TRUE	TRUE	FALSE	S2_6027		S2_6027		7.09728e+07
TGRH88_057740	KAF4638166.1;KAF4638165.1	KAF4638166.1 | transcript=TGRH88_057740_t1 | gene=TGRH88_057740 | organism=Toxoplasma_gondii_RH-88 | gene_product=rhoptry protein ROP5 | transcript_product=rhoptry protein ROP5 | location=CM023093:575977-577626(-) | protein_length=549 | sequence_SO=chromos	2	27	60.7	60.775	549	0	323.31	1//0	1//0	1//0	929940000	23	94			-1;-1	40432000	442360	39828000	162240	109620000	867770000	32301000	FALSE	TRUE	FALSE	TRUE	FALSE	TRUE				3.53069e+07	5.30081e+07	5.66487e+06	2.9848	0.846153846153846	-1.76286	0.266666666666667	-4.74766	0.157894736842105	0.586263	0.682926829268293	-2.63984	0.266666666666667	-3.2261	0.0952380952380952
TGRH88_002590	KAF4645773.1	KAF4645773.1 | transcript=TGRH88_002590_t1 | gene=TGRH88_002590 | organism=Toxoplasma_gondii_RH-88 | gene_product=unspecified product | transcript_product=unspecified product | location=CM023083:2211922-2214664(-) | protein_length=266 | sequence_SO=chromos	1	19	60.5	29.568	266	0	323.31	0//0	1//0	0//0	608220000	16	86			-1	38014000		38014000			587050000		TRUE	FALSE	FALSE	TRUE	TRUE	FALSE	S2_6027		S2_6027		4.58121e+07
TGRH88_021270	KAF4645851.1	KAF4645851.1 | transcript=TGRH88_021270_t1 | gene=TGRH88_021270 | organism=Toxoplasma_gondii_RH-88 | gene_product=histone H2Bv | transcript_product=histone H2Bv | location=CM023082:464360-464731(-) | protein_length=123 | sequence_SO=chromosome | SO=protein	1	5	33.3	13.732	123	0	55.181	1//0	1//0	0//0	224990000	7	9			-1	32141000	508710	31633000			213920000		FALSE	TRUE	FALSE	TRUE	TRUE	FALSE		S1_M	S2_6027	1.2357e+07	4.1416e+07								1.74486	0.902439024390244
TGRH88_000580	KAF4645571.1	KAF4645571.1 | transcript=TGRH88_000580_t1 | gene=TGRH88_000580 | organism=Toxoplasma_gondii_RH-88 | gene_product=unspecified product | transcript_product=unspecified product | location=CM023083:560491-562103(+) | protein_length=159 | sequence_SO=chromosom	1	7	58.5	17.913	159	0	323.31	0//0	1//0	0//0	215080000	7	44			-1	30725000		30725000			201940000		TRUE	FALSE	FALSE	TRUE	TRUE	FALSE	S2_6027		S2_6027		2.52073e+07
TGRH88_047180	KAF4640792.1	KAF4640792.1 | transcript=TGRH88_047180_t1 | gene=TGRH88_047180 | organism=Toxoplasma_gondii_RH-88 | gene_product=Tim10/DDP family zinc finger superfamily protein | transcript_product=Tim10/DDP family zinc finger superfamily protein | location=CM023091:680	1	5	75.7	11.224	103	0	241.38	1//0	1//0	0//0	152910000	5	18			-1	30582000	541770	30040000		31144000	145290000		FALSE	TRUE	FALSE	TRUE	TRUE	FALSE		S1_M	S2_6027	9.40016e+06	2.69997e+07		2.22191	0.794871794871795					1.52219	0.878048780487805
TGRH88_067940	KAF4640986.1	KAF4640986.1 | transcript=TGRH88_067940_t1 | gene=TGRH88_067940 | organism=Toxoplasma_gondii_RH-88 | gene_product=14-3-3 protein | transcript_product=14-3-3 protein | location=CM023089:825281-827912(+) | protein_length=323 | sequence_SO=chromosome | SO=pro	1	23	65.9	37.173	323	0	323.31	0//0	1//0	0//0	624880000	21	84			-1	29756000		29756000			599100000		TRUE	FALSE	FALSE	TRUE	TRUE	FALSE	S2_6027		S2_6027		3.81514e+07
TGRH88_038410	KAF4639916.1	KAF4639916.1 | transcript=TGRH88_038410_t1 | gene=TGRH88_038410 | organism=Toxoplasma_gondii_RH-88 | gene_product=unspecified product | transcript_product=unspecified product | location=CM023091:74518-76763(-) | protein_length=141 | sequence_SO=chromosome	1	8	66.7	15.231	141	0	323.31	1//0	1//0	0//0	258280000	9	39			-1	28697000	881610	27816000		85075000	249060000		FALSE	TRUE	FALSE	TRUE	TRUE	FALSE		S1_M	S2_6027	2.7534e+07	3.90848e+07		1.54969	0.58974358974359					0.505394	0.634146341463415
TGRH88_006970	KAF4644883.1	KAF4644883.1 | transcript=TGRH88_006970_t1 | gene=TGRH88_006970 | organism=Toxoplasma_gondii_RH-88 | gene_product=putative ubiquinol-cytochrome c reductase hinge protein | transcript_product=putative ubiquinol-cytochrome c reductase hinge protein | locatio	1	6	71.9	10.493	89	0	119.39	1//0	1//0	0//0	128010000	5	17			-1	25601000	145890	25456000		8293300	119300000		FALSE	TRUE	FALSE	TRUE	TRUE	FALSE		S1_M	S2_6027	2.5313e+06	2.29501e+07		3.8465	0.923076923076923					3.18055	0.975609756097561
TGRH88_003730	KAF4645269.1	KAF4645269.1 | transcript=TGRH88_003730_t1 | gene=TGRH88_003730 | organism=Toxoplasma_gondii_RH-88 | gene_product=Tim10/DDP family zinc finger superfamily protein | transcript_product=Tim10/DDP family zinc finger superfamily protein | location=CM023084:748	1	4	69.2	10.218	91	0	323.31	1//0	1//0	0//0	125320000	5	26			-1	25064000	522220	24542000		27966000	121190000		FALSE	TRUE	FALSE	TRUE	TRUE	FALSE		S1_M	S2_6027	9.06105e+06	2.03603e+07		2.11552	0.769230769230769					1.16801	0.804878048780488
TGRH88_049170	KAF4639146.1	KAF4639146.1 | transcript=TGRH88_049170_t1 | gene=TGRH88_049170 | organism=Toxoplasma_gondii_RH-88 | gene_product=rhoptry protein ROP1 | transcript_product=rhoptry protein ROP1 | location=CM023092:793899-795173(+) | protein_length=424 | sequence_SO=chromos	1	9	14.6	45.99	424	0	76.991	1//0	1//0	0//0	278040000	13	22			-1	21388000	369970	21018000		69611000	248900000		FALSE	TRUE	FALSE	TRUE	TRUE	FALSE		S1_M	S2_6027	1.66903e+07	2.59223e+07		1.83818	0.717948717948718					0.635182	0.707317073170732
TGRH88_061860	KAF4638578.1	KAF4638578.1 | transcript=TGRH88_061860_t1 | gene=TGRH88_061860 | organism=Toxoplasma_gondii_RH-88 | gene_product=unspecified product | transcript_product=unspecified product | location=CM023093:3633133-3633636(+) | protein_length=167 | sequence_SO=chromos	1	6	47.3	19.246	167	0	182.75	0//0	1//0	0//0	198040000	10	23			-1	19804000		19804000			191210000		TRUE	FALSE	FALSE	TRUE	TRUE	FALSE	S2_6027		S2_6027		3.40224e+07
TGRH88_004320	KAF4645330.1	KAF4645330.1 | transcript=TGRH88_004320_t1 | gene=TGRH88_004320 | organism=Toxoplasma_gondii_RH-88 | gene_product=zinc finger CDGSH-type domain-containing protein | transcript_product=zinc finger CDGSH-type domain-containing protein | location=CM023084:118	1	5	54.2	13.162	118	0	40.549	0//0	1//0	0//0	109470000	6	17			-1	18245000		18245000			105610000		TRUE	FALSE	FALSE	TRUE	TRUE	FALSE	S2_6027		S2_6027		1.54835e+07
TGRH88_006890	KAF4644875.1	KAF4644875.1 | transcript=TGRH88_006890_t1 | gene=TGRH88_006890 | organism=Toxoplasma_gondii_RH-88 | gene_product=putative ubiquinol cytochrome c oxidoreductase | transcript_product=putative ubiquinol cytochrome c oxidoreductase | location=CM023085:436337-	1	16	37.4	54.792	487	0	323.31	0//0	1//0	0//0	466990000	26	61			-1	17961000		17961000			443780000		TRUE	FALSE	FALSE	TRUE	TRUE	FALSE	S2_6027		S2_6027		4.25309e+07
TGRH88_018120	KAF4644818.1	KAF4644818.1 | transcript=TGRH88_018120_t1 | gene=TGRH88_018120 | organism=Toxoplasma_gondii_RH-88 | gene_product=unspecified product | transcript_product=unspecified product | location=CM023090:6392621-6394090(-) | protein_length=220 | sequence_SO=chromos	1	9	49.1	25.833	220	0	323.31	0//0	1//0	0//0	190340000	11	34			-1	17304000		17304000			183570000		TRUE	FALSE	FALSE	TRUE	TRUE	FALSE	S2_6027		S2_6027		2.35193e+07
TGRH88_074430	KAF4641633.1	KAF4641633.1 | transcript=TGRH88_074430_t1 | gene=TGRH88_074430 | organism=Toxoplasma_gondii_RH-88 | gene_product=unspecified product | transcript_product=unspecified product | location=CM023089:5577116-5579086(-) | protein_length=307 | sequence_SO=chromos	1	13	48.9	34.955	307	0	323.31	0//0	1//0	0//0	292410000	17	42			-1	17201000		17201000			282110000		TRUE	FALSE	FALSE	TRUE	TRUE	FALSE	S2_6027		S2_6027		3.92359e+07
TGRH88_067370	KAF4640929.1	KAF4640929.1 | transcript=TGRH88_067370_t1 | gene=TGRH88_067370 | organism=Toxoplasma_gondii_RH-88 | gene_product=unspecified product | transcript_product=unspecified product | location=CM023089:439558-442289(-) | protein_length=136 | sequence_SO=chromosom	1	9	44.1	15.488	136	0	323.31	0//0	1//0	0//0	154170000	9	26			-1	17130000		17130000			148630000		TRUE	FALSE	FALSE	TRUE	TRUE	FALSE	S2_6027		S2_6027		2.02459e+07
TGRH88_038710	KAF4639946.1	KAF4639946.1 | transcript=TGRH88_038710_t1 | gene=TGRH88_038710 | organism=Toxoplasma_gondii_RH-88 | gene_product=dense granule protein GRA6 | transcript_product=dense granule protein GRA6 | location=CM023091:261651-262256(+) | protein_length=201 | sequenc	1	6	27.9	20.833	201	0	323.31	1//0	1//0	0//0	136570000	8	14			-1	17071000	454120	16617000		39825000	131030000		FALSE	TRUE	FALSE	TRUE	TRUE	FALSE		S1_M	S2_6027	1.26069e+07	2.39545e+07		1.71815	0.641025641025641					0.926089	0.75609756097561
TGRH88_081780	KAF4642363.1	KAF4642363.1 | transcript=TGRH88_081780_t1 | gene=TGRH88_081780 | organism=Toxoplasma_gondii_RH-88 | gene_product=putative calmodulin | transcript_product=putative calmodulin | location=CM023089:10914615-10915667(-) | protein_length=87 | sequence_SO=chromo	1	5	71.3	9.7801	87	0	323.31	0//0	1//0	0//0	82059000	5	13			-1	16412000		16412000			78634000		TRUE	FALSE	FALSE	TRUE	TRUE	FALSE	S2_6027		S2_6027		1.3207e+07
TGRH88_020200	KAF4646233.1	KAF4646233.1 | transcript=TGRH88_020200_t1 | gene=TGRH88_020200 | organism=Toxoplasma_gondii_RH-88 | gene_product=rhoptry protein ROP4 | transcript_product=rhoptry protein ROP4 | location=CM023081:1422225-1423961(-) | protein_length=578 | sequence_SO=chrom	1	26	58.1	64.002	578	0	323.31	1//0	1//0	1//0	494390000	30	87			-1	16480000	104370	16264000	111590	19526000	488750000	14853000	FALSE	TRUE	FALSE	TRUE	FALSE	TRUE				1.08656e+07	2.66832e+07	5.08222e+06	4.64563	1	-0.394642	0.6	-5.04027	0.105263157894737	1.29616	0.829268292682927	-1.09624	0.533333333333333	-2.3924	0.238095238095238
TGRH88_040180	KAF4640093.1	KAF4640093.1 | transcript=TGRH88_040180_t1 | gene=TGRH88_040180 | organism=Toxoplasma_gondii_RH-88 | gene_product=facilitative glucose transporter GT1 | transcript_product=facilitative glucose transporter GT1 | location=CM023091:1287893-1289599(-) | protei	1	11	16	61.687	568	0	323.31	0//0	1//0	0//0	266170000	17	22			-1	15657000		15657000			257440000		TRUE	FALSE	FALSE	TRUE	TRUE	FALSE	S2_6027		S2_6027		3.00829e+07
TGRH88_051090	KAF4639337.1	KAF4639337.1 | transcript=TGRH88_051090_t1 | gene=TGRH88_051090 | organism=Toxoplasma_gondii_RH-88 | gene_product=chaperonin protein BiP | transcript_product=chaperonin protein BiP | location=CM023092:2273773-2277149(-) | protein_length=668 | sequence_SO=c	1	31	49	73.252	668	0	323.31	1//0	1//0	0//0	481420000	31	91			-1	15530000		15530000			465300000		FALSE	TRUE	FALSE	TRUE	TRUE	FALSE		S1_M	S2_6027	0	2.86556e+07
TGRH88_003600	KAF4645256.1	KAF4645256.1 | transcript=TGRH88_003600_t1 | gene=TGRH88_003600 | organism=Toxoplasma_gondii_RH-88 | gene_product=dense granule protein GRA8 | transcript_product=dense granule protein GRA8 | location=CM023084:702088-702891(-) | protein_length=267 | sequenc	1	7	24.7	28.527	267	0	323.31	0//0	1//0	0//0	137640000	9	24			-1	15294000		15294000			128910000		TRUE	FALSE	FALSE	TRUE	TRUE	FALSE	S2_6027		S2_6027		1.88086e+07
TGRH88_050010	KAF4639229.1	KAF4639229.1 | transcript=TGRH88_050010_t1 | gene=TGRH88_050010 | organism=Toxoplasma_gondii_RH-88 | gene_product=putative cytochrome C oxidase subunit IIb | transcript_product=putative cytochrome C oxidase subunit IIb | location=CM023092:1424427-1425002(+	1	5	52.4	21.228	191	0	220.82	0//0	1//0	0//0	108720000	8	11			-1	13590000		13590000			104870000		TRUE	FALSE	FALSE	TRUE	TRUE	FALSE	S2_6027		S2_6027		1.72905e+07
TGRH88_022800	KAF4646004.1	KAF4646004.1 | transcript=TGRH88_022800_t1 | gene=TGRH88_022800 | organism=Toxoplasma_gondii_RH-88 | gene_product=ribosomal protein RPS17 | transcript_product=ribosomal protein RPS17 | location=CM023082:1683789-1685489(+) | protein_length=132 | sequence_SO	1	8	55.3	15.228	132	0	191.03	0//0	1//0	0//0	76839000	6	23			-1	12807000		12807000			74213000		TRUE	FALSE	FALSE	TRUE	TRUE	FALSE	S2_6027		S2_6027		1.18473e+07
TGRH88_022080	KAF4645932.1	KAF4645932.1 | transcript=TGRH88_022080_t1 | gene=TGRH88_022080 | organism=Toxoplasma_gondii_RH-88 | gene_product=actin ACT1 | transcript_product=actin ACT1 | location=CM023082:1011189-1012751(-) | protein_length=376 | sequence_SO=chromosome | SO=protein_c	1	17	53.7	41.907	376	0	323.31	1//0	1//0	1//0	302040000	23	58			-1	13132000	400160	12500000	231910	99266000	275080000	36779000	FALSE	TRUE	FALSE	TRUE	FALSE	TRUE				3.19381e+07	2.8402e+07	8.09766e+06	1.47048	0.564102564102564	-1.43242	0.4	-2.9029	0.368421052631579	-0.169286	0.439024390243902	-1.9797	0.4	-1.81042	0.333333333333333
TGRH88_012110	KAF4644219.1	KAF4644219.1 | transcript=TGRH88_012110_t1 | gene=TGRH88_012110 | organism=Toxoplasma_gondii_RH-88 | gene_product=unspecified product | transcript_product=unspecified product | location=CM023090:1660502-1661535(+) | protein_length=121 | sequence_SO=chromos	1	4	33.1	13.491	121	0	323.31	0//0	1//0	0//0	72965000	6	15			-1	12161000		12161000			70544000		TRUE	FALSE	FALSE	TRUE	TRUE	FALSE	S2_6027		S2_6027		1.10536e+07
TGRH88_068380	KAF4641029.1	KAF4641029.1 | transcript=TGRH88_068380_t1 | gene=TGRH88_068380 | organism=Toxoplasma_gondii_RH-88 | gene_product=Cg8 family protein | transcript_product=Cg8 family protein | location=CM023089:1126200-1128059(+) | protein_length=204 | sequence_SO=chromosom	1	8	39.2	23.76	204	0	128.94	0//0	1//0	0//0	132560000	11	34			-1	12051000		12051000			127630000		TRUE	FALSE	FALSE	TRUE	TRUE	FALSE	S2_6027		S2_6027		1.65803e+07
TGRH88_072250	KAF4641415.1	KAF4641415.1 | transcript=TGRH88_072250_t1 | gene=TGRH88_072250 | organism=Toxoplasma_gondii_RH-88 | gene_product=myosin light chain MLC1 | transcript_product=myosin light chain MLC1 | location=CM023089:3944959-3947277(+) | protein_length=213 | sequence_SO	1	7	55.9	24.124	213	0	151.56	0//0	1//0	0//0	107810000	9	25			-1	11978000		11978000			103970000		TRUE	FALSE	FALSE	TRUE	TRUE	FALSE	S2_6027		S2_6027		1.19368e+07
TGRH88_077450	KAF4641933.1	KAF4641933.1 | transcript=TGRH88_077450_t1 | gene=TGRH88_077450 | organism=Toxoplasma_gondii_RH-88 | gene_product=SAG-related sequence SRS29B | transcript_product=SAG-related sequence SRS29B | location=CM023089:7770814-7771824(+) | protein_length=336 | seq	1	16	62.5	34.829	336	0	323.31	0//0	1//0	0//0	237840000	20	37			-1	11892000		11892000			230130000		TRUE	FALSE	FALSE	TRUE	TRUE	FALSE	S2_6027		S2_6027		1.70437e+07
TGRH88_016820	KAF4644688.1	KAF4644688.1 | transcript=TGRH88_016820_t1 | gene=TGRH88_016820 | organism=Toxoplasma_gondii_RH-88 | gene_product=putative calmodulin | transcript_product=putative calmodulin | location=CM023090:5325501-5325902(+) | protein_length=133 | sequence_SO=chromos	1	8	64.7	15.277	133	0	312.78	0//0	1//0	0//0	118130000	10	26			-1	11813000		11813000			113040000		TRUE	FALSE	FALSE	TRUE	TRUE	FALSE	S2_6027		S2_6027		1.0869e+07
TGRH88_007360	KAF4644921.1	KAF4644921.1 | transcript=TGRH88_007360_t1 | gene=TGRH88_007360 | organism=Toxoplasma_gondii_RH-88 | gene_product=YOU2 family C2C2 zinc finger protein | transcript_product=YOU2 family C2C2 zinc finger protein | location=CM023085:767662-769036(-) | protein_	1	9	63.8	17.125	149	0	323.31	0//0	1//0	0//0	110690000	10	30			-1	11069000		11069000			105270000		TRUE	FALSE	FALSE	TRUE	TRUE	FALSE	S2_6027		S2_6027		1.48598e+07
TGRH88_040440	KAF4640119.1	KAF4640119.1 | transcript=TGRH88_040440_t1 | gene=TGRH88_040440 | organism=Toxoplasma_gondii_RH-88 | gene_product=toxofilin | transcript_product=toxofilin | location=CM023091:1523309-1524046(-) | protein_length=245 | sequence_SO=chromosome | SO=protein_cod	2	15	58.8	27.131	245	0	245.13	1//0	1//0	0//0	230810000	16	52			-1;-1	14426000	3672300	10754000		694670000	149190000		FALSE	TRUE	FALSE	TRUE	TRUE	FALSE		S1_M	S2_6027	9.66371e+07	1.32522e+07		-2.21918	0.102564102564103					-2.86635	0.0975609756097561
TGRH88_080370	KAF4642224.1	KAF4642224.1 | transcript=TGRH88_080370_t1 | gene=TGRH88_080370 | organism=Toxoplasma_gondii_RH-88 | gene_product=SAG-related sequence SRS34A | transcript_product=SAG-related sequence SRS34A | location=CM023089:9875363-9875923(+) | protein_length=186 | seq	1	6	36.6	18.981	186	0	323.31	0//0	1//0	0//0	111800000	11	23			-1	10164000		10164000			107880000		TRUE	FALSE	FALSE	TRUE	TRUE	FALSE	S2_6027		S2_6027		1.54065e+07
TGRH88_067080	KAF4640900.1	KAF4640900.1 | transcript=TGRH88_067080_t1 | gene=TGRH88_067080 | organism=Toxoplasma_gondii_RH-88 | gene_product=unspecified product | transcript_product=unspecified product | location=CM023089:232522-233184(-) | protein_length=220 | sequence_SO=chromosom	1	10	46.8	24.547	220	0	323.31	0//0	1//0	0//0	166280000	17	25			-1	9781000		9781000			160730000		TRUE	FALSE	FALSE	TRUE	TRUE	FALSE	S2_6027		S2_6027		1.96795e+07
TGRH88_061630	KAF4638555.1	KAF4638555.1 | transcript=TGRH88_061630_t1 | gene=TGRH88_061630 | organism=Toxoplasma_gondii_RH-88 | gene_product=heat shock protein HSP60 | transcript_product=heat shock protein HSP60 | location=CM023093:3463524-3467492(-) | protein_length=575 | sequence_	1	19	50.6	60.913	575	0	323.31	1//0	1//0	0//0	293090000	30	70			-1	9769700	80694	9689000		30781000	272100000		FALSE	TRUE	FALSE	TRUE	TRUE	FALSE		S1_M	S2_6027	8.40068e+06	2.21461e+07		3.14402	0.897435897435897					1.39848	0.853658536585366
TGRH88_014400	KAF4644446.1	KAF4644446.1 | transcript=TGRH88_014400_t1 | gene=TGRH88_014400 | organism=Toxoplasma_gondii_RH-88 | gene_product=PEP-carboxykinase I | transcript_product=PEP-carboxykinase I | location=CM023090:3429019-3432214(+) | protein_length=677 | sequence_SO=chromos	1	22	42.5	75.342	677	0	323.31	1//0	1//0	0//0	288060000	30	55			-1	9601900	47468	9554400		15424000	277870000		FALSE	TRUE	FALSE	TRUE	TRUE	FALSE		S1_M	S2_6027	4.94169e+06	1.96251e+07		4.17116	0.948717948717949					1.98962	0.926829268292683
TGRH88_005920	KAF4645488.1	KAF4645488.1 | transcript=TGRH88_005920_t1 | gene=TGRH88_005920 | organism=Toxoplasma_gondii_RH-88 | gene_product=ribosomal protein RPS10 | transcript_product=ribosomal protein RPS10 | location=CM023084:2394619-2396852(-) | protein_length=152 | sequence_SO	1	4	33.6	17.398	152	0	25.599	0//0	1//0	0//0	80379000	9	11			-1	8931000		8931000			77704000		TRUE	FALSE	FALSE	TRUE	TRUE	FALSE	S2_6027		S2_6027		1.49036e+07
TGRH88_041400	KAF4640215.1	KAF4640215.1 | transcript=TGRH88_041400_t1 | gene=TGRH88_041400 | organism=Toxoplasma_gondii_RH-88 | gene_product=putative peptidase M16 family protein | transcript_product=putative peptidase M16 family protein | location=CM023091:2204902-2210561(-) | prot	1	14	45.8	56.915	509	0	323.31	0//0	1//0	0//0	226280000	27	50			-1	8380700		8380700			218590000		TRUE	FALSE	FALSE	TRUE	TRUE	FALSE	S2_6027		S2_6027		2.26255e+07
TGRH88_024580	KAF4643703.1	KAF4643703.1 | transcript=TGRH88_024580_t1 | gene=TGRH88_024580 | organism=Toxoplasma_gondii_RH-88 | gene_product=ribosomal protein RPS15 | transcript_product=ribosomal protein RPS15 | location=CM023086:986374-987812(-) | protein_length=150 | sequence_SO=c	1	3	26.7	17.157	150	0	21.083	0//0	1//0	0//0	49735000	6	3			-1	8289200		8289200			48079000		TRUE	FALSE	FALSE	TRUE	TRUE	FALSE	S2_6027		S2_6027		9.44084e+06
TGRH88_074190	KAF4641609.1	KAF4641609.1 | transcript=TGRH88_074190_t1 | gene=TGRH88_074190 | organism=Toxoplasma_gondii_RH-88 | gene_product=putative calcium binding protein precursor | transcript_product=putative calcium binding protein precursor | location=CM023089:5400416-5402956	1	17	59.7	38.277	335	0	323.31	0//0	1//0	0//0	137620000	17	55			-1	8095500		8095500			132800000		TRUE	FALSE	FALSE	TRUE	TRUE	FALSE	S2_6027		S2_6027		1.17878e+07
TGRH88_058240	KAF4638216.1	KAF4638216.1 | transcript=TGRH88_058240_t1 | gene=TGRH88_058240 | organism=Toxoplasma_gondii_RH-88 | gene_product=acid phosphatase GAP50 | transcript_product=acid phosphatase GAP50 | location=CM023093:980277-983163(-) | protein_length=431 | sequence_SO=chr	1	14	47.3	46.606	431	0	323.31	0//0	1//0	0//0	192040000	24	40			-1	8001600		8001600			185820000		TRUE	FALSE	FALSE	TRUE	TRUE	FALSE	S2_6027		S2_6027		2.14444e+07
TGRH88_008430	KAF4645027.1	KAF4645027.1 | transcript=TGRH88_008430_t1 | gene=TGRH88_008430 | organism=Toxoplasma_gondii_RH-88 | gene_product=TB2/DP1, HVA22 family protein | transcript_product=TB2/DP1, HVA22 family protein | location=CM023085:1604845-1605351(+) | protein_length=168 |	1	3	19	19.036	168	0	27.593	0//0	1//0	0//0	47944000	6	11			-1	7990600		7990600			46435000		TRUE	FALSE	FALSE	TRUE	TRUE	FALSE	S2_6027		S2_6027		9.10061e+06
TGRH88_043730	KAF4640447.1	KAF4640447.1 | transcript=TGRH88_043730_t1 | gene=TGRH88_043730 | organism=Toxoplasma_gondii_RH-88 | gene_product=putative GAP45 | transcript_product=putative GAP45 | location=CM023091:4123295-4124032(+) | protein_length=245 | sequence_SO=chromosome | SO=p	1	8	46.1	27.318	245	0	323.31	0//0	1//0	0//0	94691000	12	22			-1	7890900		7890900			92011000		TRUE	FALSE	FALSE	TRUE	TRUE	FALSE	S2_6027		S2_6027		1.5707e+07
TGRH88_013580	KAF4644365.1	KAF4644365.1 | transcript=TGRH88_013580_t1 | gene=TGRH88_013580 | organism=Toxoplasma_gondii_RH-88 | gene_product=ubiquinol-cytochrome c reductase | transcript_product=ubiquinol-cytochrome c reductase | location=CM023090:2789734-2792130(+) | protein_length	1	7	43.2	26.741	234	0	305.97	0//0	1//0	0//0	100410000	13	23			-1	7724200		7724200			96759000		TRUE	FALSE	FALSE	TRUE	TRUE	FALSE	S2_6027		S2_6027		1.48122e+07
TGRH88_025670	KAF4643811.1	KAF4643811.1 | transcript=TGRH88_025670_t1 | gene=TGRH88_025670 | organism=Toxoplasma_gondii_RH-88 | gene_product=unspecified product | transcript_product=unspecified product | location=CM023086:1824208-1825856(+) | protein_length=218 | sequence_SO=chromos	1	4	21.1	25.436	218	0	45.649	0//0	1//0	0//0	75765000	10	14			-1	7576500		7576500			72997000		TRUE	FALSE	FALSE	TRUE	TRUE	FALSE	S2_6027		S2_6027		1.25823e+07
TGRH88_021450	KAF4645869.1	KAF4645869.1 | transcript=TGRH88_021450_t1 | gene=TGRH88_021450 | organism=Toxoplasma_gondii_RH-88 | gene_product=unspecified product | transcript_product=unspecified product | location=CM023082:599490-600988(-) | protein_length=218 | sequence_SO=chromosom	1	4	19.3	23.416	218	0	200.14	0//0	1//0	0//0	52340000	7	15			-1	7477100		7477100			50368000		TRUE	FALSE	FALSE	TRUE	TRUE	FALSE	S2_6027		S2_6027		8.7139e+06
TGRH88_074780	KAF4641668.1	KAF4641668.1 | transcript=TGRH88_074780_t1 | gene=TGRH88_074780 | organism=Toxoplasma_gondii_RH-88 | gene_product=peroxiredoxin PRX3 | transcript_product=peroxiredoxin PRX3 | location=CM023089:5865043-5867175(-) | protein_length=283 | sequence_SO=chromosom	1	9	32.9	30.463	283	0	95.977	0//0	1//0	0//0	103430000	15	23			-1	6895300		6895300			100000000		TRUE	FALSE	FALSE	TRUE	TRUE	FALSE	S2_6027		S2_6027		1.33271e+07
TGRH88_011750	KAF4644183.1	KAF4644183.1 | transcript=TGRH88_011750_t1 | gene=TGRH88_011750 | organism=Toxoplasma_gondii_RH-88 | gene_product=ribosomal protein RPSA | transcript_product=ribosomal protein RPSA | location=CM023090:1382766-1385105(-) | protein_length=287 | sequence_SO=c	1	11	56.1	31.512	287	0	82.737	0//0	1//0	0//0	79295000	12	24			-1	6607900		6607900			76533000		TRUE	FALSE	FALSE	TRUE	TRUE	FALSE	S2_6027		S2_6027		8.03173e+06
TGRH88_014730	KAF4644479.1	KAF4644479.1 | transcript=TGRH88_014730_t1 | gene=TGRH88_014730 | organism=Toxoplasma_gondii_RH-88 | gene_product=unspecified product | transcript_product=unspecified product | location=CM023090:3621995-3623599(+) | protein_length=232 | sequence_SO=chromos	1	4	30.2	24.488	232	0	323.31	1//0	1//0	0//0	85665000	12	15			-1	7138700	565770	6573000		81724000	73207000		FALSE	TRUE	FALSE	TRUE	TRUE	FALSE		S1_M	S2_6027	2.35598e+07	1.41277e+07		-0.158778	0.307692307692308					-0.737806	0.292682926829268
TGRH88_083200	KAF4642509.1	KAF4642509.1 | transcript=TGRH88_083200_t1 | gene=TGRH88_083200 | organism=Toxoplasma_gondii_RH-88 | gene_product=unspecified product | transcript_product=unspecified product | location=CM023089:11952442-11953002(+) | protein_length=186 | sequence_SO=chrom	1	3	33.9	20.245	186	0	183.18	0//0	1//0	0//0	51152000	8	9			-1	6394000		6394000			49206000		TRUE	FALSE	FALSE	TRUE	TRUE	FALSE	S2_6027		S2_6027		9.70957e+06
TGRH88_028550	KAF4643188.1	KAF4643188.1 | transcript=TGRH88_028550_t1 | gene=TGRH88_028550 | organism=Toxoplasma_gondii_RH-88 | gene_product=putative prohibitin | transcript_product=putative prohibitin | location=CM023087:808674-811056(-) | protein_length=271 | sequence_SO=chromosom	1	12	63.8	30.221	271	0	323.31	0//0	1//0	0//0	91970000	15	26			-1	6131300		6131300			88799000		TRUE	FALSE	FALSE	TRUE	TRUE	FALSE	S2_6027		S2_6027		9.98684e+06
TGRH88_031680	KAF4643502.1	KAF4643502.1 | transcript=TGRH88_031680_t1 | gene=TGRH88_031680 | organism=Toxoplasma_gondii_RH-88 | gene_product=histone H4 | transcript_product=histone H4 | location=CM023087:3203749-3204060(+) | protein_length=103 | sequence_SO=chromosome | SO=protein_c	1	2	12.6	11.473	103	0	15.952	1//0	1//0	1//0	50051000	6	14			-1	8341800	2268700	5719300	353830	120930000	51422000	30497000	FALSE	TRUE	FALSE	TRUE	FALSE	TRUE				4.72359e+07	6.51377e+06	3.22296e+06	-1.23371	0.153846153846154	-1.98743	0.2	-0.753718	0.684210526315789	-2.85832	0.121951219512195	-3.87343	0.0666666666666667	-1.01511	0.428571428571429
TGRH88_038860	KAF4639961.1;KAF4639960.1	KAF4639961.1 | transcript=TGRH88_038860_t1 | gene=TGRH88_038860 | organism=Toxoplasma_gondii_RH-88 | gene_product=rhoptry protein ROP2 (RH) | transcript_product=rhoptry protein ROP2 (RH) | location=CM023091:376845-377963(-) | protein_length=372 | sequence_	2	9	31.5	43.078	372	0	161.35	0//0	1//0	0//0	108280000	19	24			-1;-1	5699200		5699200			104320000		TRUE	FALSE	FALSE	TRUE	TRUE	FALSE	S2_6027		S2_6027		1.12613e+07
TGRH88_026420	KAF4643886.1	KAF4643886.1 | transcript=TGRH88_026420_t1 | gene=TGRH88_026420 | organism=Toxoplasma_gondii_RH-88 | gene_product=unspecified product | transcript_product=unspecified product | location=CM023086:2393439-2394762(-) | protein_length=166 | sequence_SO=chromos	1	6	50.6	18.384	166	0	86.726	1//0	1//0	0//0	53732000	9	19			-1	5970200	281860	5688300		29082000	49835000		FALSE	TRUE	FALSE	TRUE	TRUE	FALSE		S1_M	S2_6027	8.80301e+06	8.23242e+06		0.777033	0.384615384615385					-0.0966802	0.48780487804878
TGRH88_044770	KAF4640551.1	KAF4640551.1 | transcript=TGRH88_044770_t1 | gene=TGRH88_044770 | organism=Toxoplasma_gondii_RH-88 | gene_product=ribosomal protein RPS18 | transcript_product=ribosomal protein RPS18 | location=CM023091:5028375-5029623(-) | protein_length=156 | sequence_SO	1	6	44.9	17.722	156	0	175.1	0//0	1//0	0//0	51190000	9	13			-1	5687800		5687800			49519000		TRUE	FALSE	FALSE	TRUE	TRUE	FALSE	S2_6027		S2_6027		6.99514e+06
TGRH88_047230	KAF4640797.1	KAF4640797.1 | transcript=TGRH88_047230_t1 | gene=TGRH88_047230 | organism=Toxoplasma_gondii_RH-88 | gene_product=unspecified product | transcript_product=unspecified product | location=CM023091:6829943-6831680(-) | protein_length=122 | sequence_SO=chromos	1	6	56.6	14.374	122	0	66.652	0//0	1//0	0//0	37971000	7	18			-1	5424500		5424500			36678000		TRUE	FALSE	FALSE	TRUE	TRUE	FALSE	S2_6027		S2_6027		5.8967e+06
TGRH88_029380	KAF4643271.1	KAF4643271.1 | transcript=TGRH88_029380_t1 | gene=TGRH88_029380 | organism=Toxoplasma_gondii_RH-88 | gene_product=membrane protein | transcript_product=membrane protein | location=CM023087:1376138-1378328(-) | protein_length=211 | sequence_SO=chromosome |	1	4	19.4	24.515	211	0	78.772	0//0	1//0	0//0	74659000	14	14			-1	5332800		5332800			72092000		TRUE	FALSE	FALSE	TRUE	TRUE	FALSE	S2_6027		S2_6027		1.37267e+07
TGRH88_046190	KAF4640693.1	KAF4640693.1 | transcript=TGRH88_046190_t1 | gene=TGRH88_046190 | organism=Toxoplasma_gondii_RH-88 | gene_product=putative cytochrome C oxidase subunit IIa | transcript_product=putative cytochrome C oxidase subunit IIa | location=CM023091:6053202-6055608(-	1	4	15.7	34.488	299	0	78.601	0//0	1//0	0//0	82817000	16	16			-1	5176000		5176000			79929000		TRUE	FALSE	FALSE	TRUE	TRUE	FALSE	S2_6027		S2_6027		1.53692e+07
TGRH88_034260	KAF4642700.1	KAF4642700.1 | transcript=TGRH88_034260_t1 | gene=TGRH88_034260 | organism=Toxoplasma_gondii_RH-88 | gene_product=rhoptry protein ROP18 | transcript_product=rhoptry protein ROP18 | location=CM023088:1595886-1597550(-) | protein_length=554 | sequence_SO=chr	1	12	31.2	62.342	554	0	323.31	0//0	1//0	0//0	154650000	30	24			-1	5154900		5154900			148180000		TRUE	FALSE	FALSE	TRUE	TRUE	FALSE	S2_6027		S2_6027		2.33798e+07
TGRH88_057300	KAF4638121.1	KAF4638121.1 | transcript=TGRH88_057300_t1 | gene=TGRH88_057300 | organism=Toxoplasma_gondii_RH-88 | gene_product=signal peptidase subunit protein | transcript_product=signal peptidase subunit protein | location=CM023093:224395-225335(-) | protein_length=1	1	6	39.4	19.514	175	0	90.512	0//0	1//0	0//0	25681000	5	15			-1	5136200		5136200			24834000		TRUE	FALSE	FALSE	TRUE	TRUE	FALSE	S2_6027		S2_6027		3.55566e+06
TGRH88_039670	KAF4640042.1	KAF4640042.1 | transcript=TGRH88_039670_t1 | gene=TGRH88_039670 | organism=Toxoplasma_gondii_RH-88 | gene_product=MIC2-associated protein M2AP | transcript_product=MIC2-associated protein M2AP | location=CM023091:931270-933455(-) | protein_length=330 | seq	1	7	39.7	34.573	330	0	323.31	0//0	1//0	0//0	51235000	10	19			-1	5123500		5123500			46200000		TRUE	FALSE	FALSE	TRUE	TRUE	FALSE	S2_6027		S2_6027		6.81192e+06
TGRH88_050720	KAF4639300.1	KAF4639300.1 | transcript=TGRH88_050720_t1 | gene=TGRH88_050720 | organism=Toxoplasma_gondii_RH-88 | gene_product=putative DnaJ family chaperone | transcript_product=putative DnaJ family chaperone | location=CM023092:1951451-1956474(-) | protein_length=426	1	14	50.7	47.448	426	0	323.31	0//0	1//0	0//0	80003000	17	27			-1	4706100		4706100			77336000		TRUE	FALSE	FALSE	TRUE	TRUE	FALSE	S2_6027		S2_6027		8.59072e+06
TGRH88_043050	KAF4640379.1	KAF4640379.1 | transcript=TGRH88_043050_t1 | gene=TGRH88_043050 | organism=Toxoplasma_gondii_RH-88 | gene_product=ribosomal protein RPS19 | transcript_product=ribosomal protein RPS19 | location=CM023091:3606803-3610012(+) | protein_length=243 | sequence_SO	1	5	22.6	27.567	243	0	69.608	0//0	1//0	0//0	55835000	12	13			-1	4652900		4652900			53917000		TRUE	FALSE	FALSE	TRUE	TRUE	FALSE	S2_6027		S2_6027		9.21746e+06
TGRH88_052770	KAF4639505.1	KAF4639505.1 | transcript=TGRH88_052770_t1 | gene=TGRH88_052770 | organism=Toxoplasma_gondii_RH-88 | gene_product=unspecified product | transcript_product=unspecified product | location=CM023092:3628681-3629286(+) | protein_length=201 | sequence_SO=chromos	1	7	64.2	22.302	201	0	303	1//0	1//0	0//0	53895000	10	22			-1	5389500	759580	4629900		86956000	46255000		FALSE	TRUE	FALSE	TRUE	TRUE	FALSE		S1_M	S2_6027	2.63592e+07	7.45428e+06		-0.910676	0.230769230769231					-1.82216	0.219512195121951
TGRH88_064730	KAF4638864.1;KAF4644699.1	KAF4638864.1 | transcript=TGRH88_064730_t1 | gene=TGRH88_064730 | organism=Toxoplasma_gondii_RH-88 | gene_product=histone H2Bb | transcript_product=histone H2Bb | location=CM023093:5714965-5715312(+) | protein_length=115 | sequence_SO=chromosome | SO=prote	2	2	33.9	12.575	115	0	12.879	0//1	1//0	0//0	32015000	7	3			-1;-1	4573500		4573500			31155000		TRUE	FALSE	FALSE	TRUE	TRUE	FALSE	S2_6027		S2_6027		6.07698e+06
TGRH88_036350	KAF4642906.1	KAF4642906.1 | transcript=TGRH88_036350_t1 | gene=TGRH88_036350 | organism=Toxoplasma_gondii_RH-88 | gene_product=putative peptidase M16, alpha subunit | transcript_product=putative peptidase M16, alpha subunit | location=CM023088:3201287-3207570(-) | prot	1	12	28.4	62.161	563	0	196.52	0//0	1//0	0//0	113720000	26	37			-1	4373800		4373800			109140000		TRUE	FALSE	FALSE	TRUE	TRUE	FALSE	S2_6027		S2_6027		9.87501e+06
TGRH88_054460	KAF4639674.1	KAF4639674.1 | transcript=TGRH88_054460_t1 | gene=TGRH88_054460 | organism=Toxoplasma_gondii_RH-88 | gene_product=unspecified product | transcript_product=unspecified product | location=CM023092:4920920-4921396(+) | protein_length=158 | sequence_SO=chromos	1	2	23.4	15.971	158	0	53.649	0//0	1//0	0//0	21465000	5	6			-1	4293000		4293000			20667000		TRUE	FALSE	FALSE	TRUE	TRUE	FALSE	S2_6027		S2_6027		4.07454e+06
TGRH88_021840	KAF4645908.1	KAF4645908.1 | transcript=TGRH88_021840_t1 | gene=TGRH88_021840 | organism=Toxoplasma_gondii_RH-88 | gene_product=unspecified product | transcript_product=unspecified product | location=CM023082:843141-857691(+) | protein_length=2141 | sequence_SO=chromoso	1	15	8.4	234.45	2141	0	323.31	0//0	1//0	0//0	421710000	100	63			-1	4217100		4217100			407180000		TRUE	FALSE	FALSE	TRUE	TRUE	FALSE	S2_6027		S2_6027		3.94433e+07
TGRH88_067960	KAF4640988.1	KAF4640988.1 | transcript=TGRH88_067960_t1 | gene=TGRH88_067960 | organism=Toxoplasma_gondii_RH-88 | gene_product=unspecified product | transcript_product=unspecified product | location=CM023089:835192-835593(+) | protein_length=133 | sequence_SO=chromosom	1	5	56.4	14.407	133	0	65.856	0//0	1//0	0//0	33536000	8	10			-1	4192000		4192000			32546000		TRUE	FALSE	FALSE	TRUE	TRUE	FALSE	S2_6027		S2_6027		5.47847e+06
TGRH88_037060	KAF4642977.1	KAF4642977.1 | transcript=TGRH88_037060_t1 | gene=TGRH88_037060 | organism=Toxoplasma_gondii_RH-88 | gene_product=unspecified product | transcript_product=unspecified product | location=CM023088:3822798-3824189(+) | protein_length=128 | sequence_SO=chromos	1	3	28.9	15.269	128	0	51.378	0//0	1//0	0//0	28415000	7	8			-1	4059300		4059300			27432000		TRUE	FALSE	FALSE	TRUE	TRUE	FALSE	S2_6027		S2_6027		5.39371e+06
TGRH88_053810	KAF4639609.1	KAF4639609.1 | transcript=TGRH88_053810_t1 | gene=TGRH88_053810 | organism=Toxoplasma_gondii_RH-88 | gene_product=putative atp synthase F1, epsilon subunit | transcript_product=putative atp synthase F1, epsilon subunit | location=CM023092:4385040-4386933(-	1	2	30.1	8.4786	73	0	26.469	0//0	1//0	0//0	19306000	5	2			-1	3861200		3861200			18495000		TRUE	FALSE	FALSE	TRUE	TRUE	FALSE	S2_6027		S2_6027		3.66465e+06
TGRH88_072660	KAF4641456.1	KAF4641456.1 | transcript=TGRH88_072660_t1 | gene=TGRH88_072660 | organism=Toxoplasma_gondii_RH-88 | gene_product=NAC domain-containing protein | transcript_product=NAC domain-containing protein | location=CM023089:4258789-4259361(+) | protein_length=190 |	1	5	42.1	20.316	190	0	323.31	0//0	1//0	0//0	34248000	9	16			-1	3805300		3805300			33262000		TRUE	FALSE	FALSE	TRUE	TRUE	FALSE	S2_6027		S2_6027		5.08424e+06
TGRH88_068890	KAF4641080.1	KAF4641080.1 | transcript=TGRH88_068890_t1 | gene=TGRH88_068890 | organism=Toxoplasma_gondii_RH-88 | gene_product=ATP synthase beta subunit ATP-B | transcript_product=ATP synthase beta subunit ATP-B | location=CM023089:1501821-1504922(-) | protein_length=5	1	16	42.9	59.916	560	0	323.31	0//0	1//0	0//0	112540000	30	35			-1	3751500		3751500			108680000		TRUE	FALSE	FALSE	TRUE	TRUE	FALSE	S2_6027		S2_6027		9.93667e+06
TGRH88_060850	KAF4638477.1	KAF4638477.1 | transcript=TGRH88_060850_t1 | gene=TGRH88_060850 | organism=Toxoplasma_gondii_RH-88 | gene_product=unspecified product | transcript_product=unspecified product | location=CM023093:2892413-2896108(+) | protein_length=383 | sequence_SO=chromos	1	9	36.6	42.82	383	0	307.62	0//0	1//0	0//0	74498000	20	19			-1	3724900		3724900			71781000		TRUE	FALSE	FALSE	TRUE	TRUE	FALSE	S2_6027		S2_6027		9.24964e+06
TGRH88_020190	KAF4646232.1;KAF4646231.1	KAF4646232.1 | transcript=TGRH88_020190_t1 | gene=TGRH88_020190 | organism=Toxoplasma_gondii_RH-88 | gene_product=rhoptry protein ROP7 | transcript_product=rhoptry protein ROP7 | location=CM023081:1418290-1420017(-) | protein_length=575 | sequence_SO=chrom	2	8	36.5	63.394	575	0	323.31	0//0	1//0	0//1	89029000	24	24			-1;-1	3709600		3709600			85971000		TRUE	FALSE	FALSE	TRUE	TRUE	FALSE	S2_6027		S2_6027		1.07377e+07
TGRH88_054760	KAF4639704.1	KAF4639704.1 | transcript=TGRH88_054760_t1 | gene=TGRH88_054760 | organism=Toxoplasma_gondii_RH-88 | gene_product=putative integral membrane protein, DUF56 family protein | transcript_product=putative integral membrane protein, DUF56 family protein | locat	1	3	28.7	18.101	157	0	143.32	0//0	1//0	0//0	25895000	7	9			-1	3699300		3699300			25046000		TRUE	FALSE	FALSE	TRUE	TRUE	FALSE	S2_6027		S2_6027		4.91533e+06
TGRH88_000140	KAF4645527.1	KAF4645527.1 | transcript=TGRH88_000140_t1 | gene=TGRH88_000140 | organism=Toxoplasma_gondii_RH-88 | gene_product=putative transmembrane protein | transcript_product=putative transmembrane protein | location=CM023083:230880-232731(+) | protein_length=435 |	2	8	29	47.738	435	0	323.31	0//0	1//0	0//0	81228000	22	21			-1;-1	3692200		3692200			78497000		TRUE	FALSE	FALSE	TRUE	TRUE	FALSE	S2_6027		S2_6027		9.53163e+06
TGRH88_049300	KAF4639159.1	KAF4639159.1 | transcript=TGRH88_049300_t1 | gene=TGRH88_049300 | organism=Toxoplasma_gondii_RH-88 | gene_product=ribosomal protein RPP2 | transcript_product=ribosomal protein RPP2 | location=CM023092:876758-877585(-) | protein_length=113 | sequence_SO=chr	1	2	39.8	11.768	113	0	146.47	0//0	1//0	0//0	17669000	5	10			-1	3533800		3533800			16998000		TRUE	FALSE	FALSE	TRUE	TRUE	FALSE	S2_6027		S2_6027		3.35389e+06
TGRH88_060800	KAF4638472.1	KAF4638472.1 | transcript=TGRH88_060800_t1 | gene=TGRH88_060800 | organism=Toxoplasma_gondii_RH-88 | gene_product=cytochrome c1, heme protein | transcript_product=cytochrome c1, heme protein | location=CM023093:2869382-2872746(+) | protein_length=398 | seq	1	9	28.6	45.968	398	0	323.31	0//0	1//0	0//0	62361000	19	24			-1	3282200		3282200			60104000		TRUE	FALSE	FALSE	TRUE	TRUE	FALSE	S2_6027		S2_6027		6.5442e+06
TGRH88_041990	KAF4640274.1	KAF4640274.1 | transcript=TGRH88_041990_t1 | gene=TGRH88_041990 | organism=Toxoplasma_gondii_RH-88 | gene_product=myosin A | transcript_product=myosin A | location=CM023091:2653725-2659335(-) | protein_length=831 | sequence_SO=chromosome | SO=protein_codin	1	28	41.4	93.333	831	0	323.31	0//0	1//0	0//0	150380000	46	61			-1	3269100		3269100			145070000		TRUE	FALSE	FALSE	TRUE	TRUE	FALSE	S2_6027		S2_6027		9.69915e+06
TGRH88_063660	KAF4638757.1	KAF4638757.1 | transcript=TGRH88_063660_t1 | gene=TGRH88_063660 | organism=Toxoplasma_gondii_RH-88 | gene_product=putative mitochondria-associated granulocyte macrophage CSF signaling molecule | transcript_product=putative mitochondria-associated granulocy	1	4	44.9	14.639	136	0	102.41	0//0	1//0	0//0	22752000	7	10			-1	3250200		3250200			21999000		TRUE	FALSE	FALSE	TRUE	TRUE	FALSE	S2_6027		S2_6027		3.81253e+06
TGRH88_034710	KAF4642745.1	KAF4642745.1 | transcript=TGRH88_034710_t1 | gene=TGRH88_034710 | organism=Toxoplasma_gondii_RH-88 | gene_product=putative ATPase synthase subunit alpha | transcript_product=putative ATPase synthase subunit alpha | location=CM023088:1905824-1913223(+) | pr	1	12	21.6	61.111	565	0	116.2	0//0	1//0	0//0	101470000	32	20			-1	3171000		3171000			98016000		TRUE	FALSE	FALSE	TRUE	TRUE	FALSE	S2_6027		S2_6027		1.24993e+07
TGRH88_008890	KAF4645073.1	KAF4645073.1 | transcript=TGRH88_008890_t1 | gene=TGRH88_008890 | organism=Toxoplasma_gondii_RH-88 | gene_product=unspecified product | transcript_product=unspecified product | location=CM023085:1965809-1966129(+) | protein_length=106 | sequence_SO=chromos	1	2	44.3	11.577	106	0	11.531	0//0	1//0	0//0	9403900	3	4			-1	3134600		3134600			9065400		TRUE	FALSE	FALSE	TRUE	TRUE	FALSE	S2_6027		S2_6027		1.78506e+06
TGRH88_077070	KAF4641895.1	KAF4641895.1 | transcript=TGRH88_077070_t1 | gene=TGRH88_077070 | organism=Toxoplasma_gondii_RH-88 | gene_product=SPFH domain / Band 7 family protein | transcript_product=SPFH domain / Band 7 family protein | location=CM023089:7522936-7527204(-) | protein_	1	7	27.9	32.061	290	0	163.98	0//0	1//0	0//0	48938000	16	16			-1	3058700		3058700			47019000		TRUE	FALSE	FALSE	TRUE	TRUE	FALSE	S2_6027		S2_6027		5.34914e+06
TGRH88_071930	KAF4641383.1	KAF4641383.1 | transcript=TGRH88_071930_t1 | gene=TGRH88_071930 | organism=Toxoplasma_gondii_RH-88 | gene_product=putative myosin heavy chain | transcript_product=putative myosin heavy chain | location=CM023089:3640351-3644385(+) | protein_length=208 | seq	1	6	36.1	23.334	208	0	88.443	0//0	1//0	0//0	33068000	11	13			-1	3006200		3006200			31934000		TRUE	FALSE	FALSE	TRUE	TRUE	FALSE	S2_6027		S2_6027		4.515e+06
TGRH88_002330	KAF4645747.1	KAF4645747.1 | transcript=TGRH88_002330_t1 | gene=TGRH88_002330 | organism=Toxoplasma_gondii_RH-88 | gene_product=putative myosin light chain 2 | transcript_product=putative myosin light chain 2 | location=CM023083:1980417-1986229(+) | protein_length=367 |	1	11	42.5	40.542	367	0	219.75	0//0	1//0	0//0	55619000	19	27			-1	2927300		2927300			53715000		TRUE	FALSE	FALSE	TRUE	TRUE	FALSE	S2_6027		S2_6027		6.29915e+06
TGRH88_005290	KAF4645425.1	KAF4645425.1 | transcript=TGRH88_005290_t1 | gene=TGRH88_005290 | organism=Toxoplasma_gondii_RH-88 | gene_product=unspecified product | transcript_product=unspecified product | location=CM023084:1982540-1984078(-) | protein_length=136 | sequence_SO=chromos	1	3	38.2	15.081	136	0	26.915	0//0	1//0	0//0	22603000	8	11			-1	2825300		2825300			21845000		TRUE	FALSE	FALSE	TRUE	TRUE	FALSE	S2_6027		S2_6027		4.29039e+06
TGRH88_082400	KAF4642425.1	KAF4642425.1 | transcript=TGRH88_082400_t1 | gene=TGRH88_082400 | organism=Toxoplasma_gondii_RH-88 | gene_product=enolase 2 | transcript_product=enolase 2 | location=CM023089:11368905-11370983(-) | protein_length=475 | sequence_SO=chromosome | SO=protein_c	2	11	38.9	52.113	475	0	323.31	0//0	1//0	0//0	55507000	20	28			-1;-1	2775400		2775400			53423000		TRUE	FALSE	FALSE	TRUE	TRUE	FALSE	S2_6027		S2_6027		6.48291e+06
TGRH88_045660	KAF4640640.1	KAF4640640.1 | transcript=TGRH88_045660_t1 | gene=TGRH88_045660 | organism=Toxoplasma_gondii_RH-88 | gene_product=putative ATP synthase | transcript_product=putative ATP synthase | location=CM023091:5696448-5698559(+) | protein_length=183 | sequence_SO=chr	1	4	35	19.457	183	0	91.492	0//0	1//0	0//0	30103000	11	11			-1	2736600		2736600			29130000		TRUE	FALSE	FALSE	TRUE	TRUE	FALSE	S2_6027		S2_6027		5.40117e+06
TGRH88_067290	KAF4640921.1	KAF4640921.1 | transcript=TGRH88_067290_t1 | gene=TGRH88_067290 | organism=Toxoplasma_gondii_RH-88 | gene_product=ribosomal protein RPS14 | transcript_product=ribosomal protein RPS14 | location=CM023089:397718-399445(+) | protein_length=156 | sequence_SO=c	1	3	30.8	16.301	156	0	22.065	1//0	1//0	0//0	20013000	6	10			-1	3335500	633450	2702000		43787000	16383000		FALSE	TRUE	FALSE	TRUE	TRUE	FALSE		S1_M	S2_6027	1.31892e+07	3.07734e+06		-1.4183	0.128205128205128					-2.0996	0.170731707317073
TGRH88_057710	KAF4638163.1	KAF4638163.1 | transcript=TGRH88_057710_t1 | gene=TGRH88_057710 | organism=Toxoplasma_gondii_RH-88 | gene_product=rhoptry protein ROP5 | transcript_product=rhoptry protein ROP5 | location=CM023093:562599-564248(-) | protein_length=549 | sequence_SO=chromos	1	8	56.3	60.591	549	0	222.47	0//1	1//0	0//1	58358000	22	26			-1	2652600		2652600			56415000		TRUE	FALSE	FALSE	TRUE	TRUE	FALSE	S2_6027		S2_6027		6.53057e+06
TGRH88_039000	KAF4639975.1	KAF4639975.1 | transcript=TGRH88_039000_t1 | gene=TGRH88_039000 | organism=Toxoplasma_gondii_RH-88 | gene_product=unspecified product | transcript_product=unspecified product | location=CM023091:487073-488684(+) | protein_length=111 | sequence_SO=chromosom	1	4	39.6	13.042	111	0	30.734	0//0	1//0	0//0	18517000	7	7			-1	2645300		2645300			17890000		TRUE	FALSE	FALSE	TRUE	TRUE	FALSE	S2_6027		S2_6027		3.13398e+06
TGRH88_067130	KAF4640905.1	KAF4640905.1 | transcript=TGRH88_067130_t1 | gene=TGRH88_067130 | organism=Toxoplasma_gondii_RH-88 | gene_product=unspecified product | transcript_product=unspecified product | location=CM023089:264590-265860(-) | protein_length=134 | sequence_SO=chromosom	1	2	11.2	15.406	134	0	144.99	1//0	1//0	0//0	18450000	7	9			-1	2635700	85217	2550500		15850000	8286800		FALSE	TRUE	FALSE	TRUE	TRUE	FALSE		S1_M	S2_6027	2.07004e+06	3.38886e+06		-0.935596	0.179487179487179					0.711143	0.731707317073171
TGRH88_076910	KAF4641879.1	KAF4641879.1 | transcript=TGRH88_076910_t1 | gene=TGRH88_076910 | organism=Toxoplasma_gondii_RH-88 | gene_product=heat shock protein | transcript_product=heat shock protein | location=CM023089:7394626-7395458(-) | protein_length=192 | sequence_SO=chromosom	1	5	31.8	21.035	192	0	35.381	0//0	1//0	0//0	27904000	11	12			-1	2536700		2536700			26954000		TRUE	FALSE	FALSE	TRUE	TRUE	FALSE	S2_6027		S2_6027		4.19217e+06
TGRH88_063650	KAF4638756.1	KAF4638756.1 | transcript=TGRH88_063650_t1 | gene=TGRH88_063650 | organism=Toxoplasma_gondii_RH-88 | gene_product=putative adenine nucleotide translocator | transcript_product=putative adenine nucleotide translocator | location=CM023093:4995391-4996347(+)	1	8	26.1	35.255	318	0	75.106	0//0	1//0	0//0	51184000	21	15			-1	2437300		2437300			49106000		TRUE	FALSE	FALSE	TRUE	TRUE	FALSE	S2_6027		S2_6027		5.35132e+06
TGRH88_018100	KAF4644816.1	KAF4644816.1 | transcript=TGRH88_018100_t1 | gene=TGRH88_018100 | organism=Toxoplasma_gondii_RH-88 | gene_product=unspecified product | transcript_product=unspecified product | location=CM023090:6362971-6365072(-) | protein_length=286 | sequence_SO=chromos	1	4	18.2	31.412	286	0	38.709	0//0	1//0	0//0	38704000	16	7			-1	2419000		2419000			32768000		TRUE	FALSE	FALSE	TRUE	TRUE	FALSE	S2_6027		S2_6027		6.54714e+06
TGRH88_014440	KAF4644450.1	KAF4644450.1 | transcript=TGRH88_014440_t1 | gene=TGRH88_014440 | organism=Toxoplasma_gondii_RH-88 | gene_product=glyceraldehyde-3-phosphate dehydrogenase GAPDH1 | transcript_product=glyceraldehyde-3-phosphate dehydrogenase GAPDH1 | location=CM023090:34449	1	7	24.7	53.339	489	0	323.31	1//0	1//0	1//0	80615000	28	24			-1	2879100	407740	2402800	68508	127980000	67611000	11831000	FALSE	TRUE	FALSE	TRUE	FALSE	TRUE				3.96181e+07	9.10945e+06	2.91209e+06	-0.920588	0.205128205128205	-3.43527	0.0666666666666667	-2.51469	0.473684210526316	-2.12072	0.146341463414634	-3.76603	0.133333333333333	-1.64531	0.380952380952381
TGRH88_019820	KAF4646195.1;KAF4643821.1	KAF4646195.1 | transcript=TGRH88_019820_t1 | gene=TGRH88_019820 | organism=Toxoplasma_gondii_RH-88 | gene_product=putative elongation factor 1-alpha (EF-1-ALPHA) | transcript_product=putative elongation factor 1-alpha (EF-1-ALPHA) | location=CM023081:11534	2	11	42.2	49.005	448	0	194.22	0//0	1//0	0//0	67253000	28	29			-1;-1	2401900		2401900			59505000		TRUE	FALSE	FALSE	TRUE	TRUE	FALSE	S2_6027		S2_6027		5.87099e+06
TGRH88_043750	KAF4640449.1	KAF4640449.1 | transcript=TGRH88_043750_t1 | gene=TGRH88_043750 | organism=Toxoplasma_gondii_RH-88 | gene_product=ubiquitin interaction motif family protein | transcript_product=ubiquitin interaction motif family protein | location=CM023091:4135975-4140124	1	9	37.6	41.377	388	0	293.24	0//0	1//0	0//0	42690000	18	24			-1	2371700		2371700			41209000		TRUE	FALSE	FALSE	TRUE	TRUE	FALSE	S2_6027		S2_6027		4.6775e+06
TGRH88_077950	KAF4641983.1	KAF4641983.1 | transcript=TGRH88_077950_t1 | gene=TGRH88_077950 | organism=Toxoplasma_gondii_RH-88 | gene_product=unspecified product | transcript_product=unspecified product | location=CM023089:8141109-8142211(+) | protein_length=86 | sequence_SO=chromoso	1	3	45.3	9.7939	86	0	20.109	0//0	1//0	0//0	9420500	4	6			-1	2355100		2355100			9095900		TRUE	FALSE	FALSE	TRUE	TRUE	FALSE	S2_6027		S2_6027		1.7882e+06
TGRH88_002280	KAF4645742.1	KAF4645742.1 | transcript=TGRH88_002280_t1 | gene=TGRH88_002280 | organism=Toxoplasma_gondii_RH-88 | gene_product=unspecified product | transcript_product=unspecified product | location=CM023083:1948647-1951529(+) | protein_length=248 | sequence_SO=chromos	1	3	24.2	25.336	248	0	295.56	1//0	1//0	0//0	34212000	14	14			-1	2443700	124120	2319600		19130000	32444000		FALSE	TRUE	FALSE	TRUE	TRUE	FALSE		S1_M	S2_6027	6.03012e+06	6.16428e+06		0.762115	0.358974358974359					0.0317455	0.51219512195122
TGRH88_049530	KAF4639181.1	KAF4639181.1 | transcript=TGRH88_049530_t1 | gene=TGRH88_049530 | organism=Toxoplasma_gondii_RH-88 | gene_product=putative cyclase-associated protein | transcript_product=putative cyclase-associated protein | location=CM023092:1062698-1063845(-) | protein_	1	6	39	21.759	195	0	80.364	0//0	1//0	0//0	33390000	15	15			-1	2226000		2226000			32281000		TRUE	FALSE	FALSE	TRUE	TRUE	FALSE	S2_6027		S2_6027		4.48142e+06
TGRH88_045360	KAF4640610.1	KAF4640610.1 | transcript=TGRH88_045360_t1 | gene=TGRH88_045360 | organism=Toxoplasma_gondii_RH-88 | gene_product=putative membrane protein | transcript_product=putative membrane protein | location=CM023091:5462927-5465169(+) | protein_length=128 | sequenc	1	4	37.5	14.904	128	0	29.874	0//0	1//0	0//0	17694000	8	7			-1	2211700		2211700			16826000		TRUE	FALSE	FALSE	TRUE	TRUE	FALSE	S2_6027		S2_6027		3.02974e+06
TGRH88_078290	KAF4642017.1	KAF4642017.1 | transcript=TGRH88_078290_t1 | gene=TGRH88_078290 | organism=Toxoplasma_gondii_RH-88 | gene_product=heat shock protein HSP70 | transcript_product=heat shock protein HSP70 | location=CM023089:8397083-8399086(-) | protein_length=667 | sequence_	1	12	28.2	72.292	667	0	219.29	1//0	1//0	1//0	75117000	34	34			-1	2209300	73893	2099700	35777	27171000	68258000	8117300	FALSE	TRUE	FALSE	TRUE	FALSE	TRUE				8.71835e+06	7.17284e+06	1.84666e+06	1.32893	0.538461538461538	-1.743	0.333333333333333	-3.07193	0.315789473684211	-0.28151	0.414634146341463	-2.23914	0.333333333333333	-1.95763	0.285714285714286
TGRH88_013230	KAF4644330.1	KAF4644330.1 | transcript=TGRH88_013230_t1 | gene=TGRH88_013230 | organism=Toxoplasma_gondii_RH-88 | gene_product=tryptophanyl-tRNA synthetase (TrpRS2) | transcript_product=tryptophanyl-tRNA synthetase (TrpRS2) | location=CM023090:2540362-2544545(+) | prot	1	17	41.7	67.817	606	0	259.88	0//0	1//0	0//0	67826000	33	36			-1	2055300		2055300			65594000		TRUE	FALSE	FALSE	TRUE	TRUE	FALSE	S2_6027		S2_6027		3.92339e+06
TGRH88_039680	KAF4640043.1	KAF4640043.1 | transcript=TGRH88_039680_t1 | gene=TGRH88_039680 | organism=Toxoplasma_gondii_RH-88 | gene_product=unspecified product | transcript_product=unspecified product | location=CM023091:935133-935549(+) | protein_length=138 | sequence_SO=chromosom	1	4	47.8	15.147	138	0	112.03	0//0	1//0	0//0	17661000	9	7			-1	1962300		1962300			17108000		TRUE	FALSE	FALSE	TRUE	TRUE	FALSE	S2_6027		S2_6027		2.92007e+06
TGRH88_017040	KAF4644710.1	KAF4644710.1 | transcript=TGRH88_017040_t1 | gene=TGRH88_017040 | organism=Toxoplasma_gondii_RH-88 | gene_product=putative vacuolar atp synthase subunit e | transcript_product=putative vacuolar atp synthase subunit e | location=CM023090:5457244-5460371(-)	1	7	27.2	39.129	345	0	71.317	0//0	1//0	0//0	36982000	19	13			-1	1946400		1946400			35749000		TRUE	FALSE	FALSE	TRUE	TRUE	FALSE	S2_6027		S2_6027		5.7374e+06
TGRH88_074880	KAF4641678.1	KAF4641678.1 | transcript=TGRH88_074880_t1 | gene=TGRH88_074880 | organism=Toxoplasma_gondii_RH-88 | gene_product=unspecified product | transcript_product=unspecified product | location=CM023089:5954311-5955429(-) | protein_length=372 | sequence_SO=chromos	1	7	38.2	39.498	372	0	147.88	0//0	1//0	0//0	32582000	17	17			-1	1916600		1916600			31355000		TRUE	FALSE	FALSE	TRUE	TRUE	FALSE	S2_6027		S2_6027		3.94108e+06
TGRH88_057840	KAF4638176.1	KAF4638176.1 | transcript=TGRH88_057840_t1 | gene=TGRH88_057840 | organism=Toxoplasma_gondii_RH-88 | gene_product=putative vacuolar ATP synthase subunit b | transcript_product=putative vacuolar ATP synthase subunit b | location=CM023093:647722-650456(+) |	1	13	45.1	56.614	505	0	295.61	0//0	1//0	0//0	49424000	26	39			-1	1900900		1900900			47734000		TRUE	FALSE	FALSE	TRUE	TRUE	FALSE	S2_6027		S2_6027		3.36464e+06
TGRH88_057220	KAF4638113.1	KAF4638113.1 | transcript=TGRH88_057220_t1 | gene=TGRH88_057220 | organism=Toxoplasma_gondii_RH-88 | gene_product=putative elongation factor 1-gamma | transcript_product=putative elongation factor 1-gamma | location=CM023093:176221-178821(+) | protein_leng	1	8	29.2	44.039	394	0	57.613	0//0	1//0	0//0	34049000	18	15			-1	1891600		1891600			32932000		TRUE	FALSE	FALSE	TRUE	TRUE	FALSE	S2_6027		S2_6027		3.98527e+06
TGRH88_031240	KAF4643458.1	KAF4643458.1 | transcript=TGRH88_031240_t1 | gene=TGRH88_031240 | organism=Toxoplasma_gondii_RH-88 | gene_product=dense granule protein GRA14 | transcript_product=dense granule protein GRA14 | location=CM023087:2819510-2820736(+) | protein_length=408 | seq	1	7	28.4	44.753	408	0	61.324	0//0	1//0	0//0	32125000	17	14			-1	1889700		1889700			31057000		TRUE	FALSE	FALSE	TRUE	TRUE	FALSE	S2_6027		S2_6027		4.399e+06
TGRH88_077080	KAF4641896.1	KAF4641896.1 | transcript=TGRH88_077080_t1 | gene=TGRH88_077080 | organism=Toxoplasma_gondii_RH-88 | gene_product=putative IMP dehydrogenase | transcript_product=putative IMP dehydrogenase | location=CM023089:7528647-7533782(+) | protein_length=551 | seque	1	10	26.1	59.046	551	0	66.601	0//0	1//0	0//0	50316000	27	26			-1	1863500		1863500			48546000		TRUE	FALSE	FALSE	TRUE	TRUE	FALSE	S2_6027		S2_6027		5.58565e+06
TGRH88_069550	KAF4641145.1	KAF4641145.1 | transcript=TGRH88_069550_t1 | gene=TGRH88_069550 | organism=Toxoplasma_gondii_RH-88 | gene_product=zinc finger cdgsh type protein | transcript_product=zinc finger cdgsh type protein | location=CM023089:2012800-2015067(-) | protein_length=196	1	3	26.5	21.367	196	0	154.14	1//0	1//0	0//0	20187000	9	11			-1	2243000	396490	1846500		39758000	7752200		FALSE	TRUE	FALSE	TRUE	TRUE	FALSE		S1_M	S2_6027	1.23831e+07	3.15445e+06		-2.35857	0.0769230769230769					-1.97291	0.195121951219512
TGRH88_024410	KAF4643686.1	KAF4643686.1 | transcript=TGRH88_024410_t1 | gene=TGRH88_024410 | organism=Toxoplasma_gondii_RH-88 | gene_product=unspecified product | transcript_product=unspecified product | location=CM023086:839508-840897(+) | protein_length=324 | sequence_SO=chromosom	1	7	28.1	35.227	324	0	68.492	0//0	1//0	0//0	19981000	11	14			-1	1816500		1816500			19384000		TRUE	FALSE	FALSE	TRUE	TRUE	FALSE	S2_6027		S2_6027		2.30338e+06
TGRH88_045340	KAF4640608.1	KAF4640608.1 | transcript=TGRH88_045340_t1 | gene=TGRH88_045340 | organism=Toxoplasma_gondii_RH-88 | gene_product=putative mitochondrial inner membrane translocase subunit TIM17 | transcript_product=putative mitochondrial inner membrane translocase subunit	1	2	10.9	24.692	229	0	16.666	0//0	1//0	0//0	10735000	6	3			-1	1789100		1789100			10377000		TRUE	FALSE	FALSE	TRUE	TRUE	FALSE	S2_6027		S2_6027		2.03765e+06
TGRH88_077110	KAF4641899.1	KAF4641899.1 | transcript=TGRH88_077110_t1 | gene=TGRH88_077110 | organism=Toxoplasma_gondii_RH-88 | gene_product=putative deoxyuridine 5-triphosphate nucleotidohydrolase | transcript_product=putative deoxyuridine 5-triphosphate nucleotidohydrolase | loc	1	4	29.4	18.19	170	0	42.922	0//0	1//0	0//0	14049000	8	11			-1	1756100		1756100			13647000		TRUE	FALSE	FALSE	TRUE	TRUE	FALSE	S2_6027		S2_6027		2.42711e+06
TGRH88_000070	KAF4645520.1	KAF4645520.1 | transcript=TGRH88_000070_t1 | gene=TGRH88_000070 | organism=Toxoplasma_gondii_RH-88 | gene_product=unspecified product | transcript_product=unspecified product | location=CM023083:178264-180974(-) | protein_length=454 | sequence_SO=chromosom	1	5	15.6	51.171	454	0	154.02	0//0	1//0	0//0	29839000	17	13			-1	1755200		1755200			28907000		TRUE	FALSE	FALSE	TRUE	TRUE	FALSE	S2_6027		S2_6027		4.61981e+06
TGRH88_069840	KAF4641174.1	KAF4641174.1 | transcript=TGRH88_069840_t1 | gene=TGRH88_069840 | organism=Toxoplasma_gondii_RH-88 | gene_product=putative COPI associated protein | transcript_product=putative COPI associated protein | location=CM023089:2220680-2223507(+) | protein_length	1	2	13.7	29.924	270	0	13.458	0//0	1//0	0//0	15143000	9	5			-1	1682500		1682500			12021000		TRUE	FALSE	FALSE	TRUE	TRUE	FALSE	S2_6027		S2_6027		2.87433e+06
TGRH88_062210	KAF4638613.1	KAF4638613.1 | transcript=TGRH88_062210_t1 | gene=TGRH88_062210 | organism=Toxoplasma_gondii_RH-88 | gene_product=GTP-binding nuclear protein ran/tc4 | transcript_product=GTP-binding nuclear protein ran/tc4 | location=CM023093:3869769-3872836(+) | protein_	1	7	39.3	25.997	229	0	113.69	0//0	1//0	0//0	23395000	14	12			-1	1671000		1671000			22543000		TRUE	FALSE	FALSE	TRUE	TRUE	FALSE	S2_6027		S2_6027		3.0256e+06
TGRH88_061450	KAF4638537.1	KAF4638537.1 | transcript=TGRH88_061450_t1 | gene=TGRH88_061450 | organism=Toxoplasma_gondii_RH-88 | gene_product=thioredoxin domain-containing protein | transcript_product=thioredoxin domain-containing protein | location=CM023093:3329164-3331280(-) | prot	1	3	15.1	33.676	312	0	20.568	0//0	1//0	0//0	12241000	8	5			-1	1530100		1530100			11845000		TRUE	FALSE	FALSE	TRUE	TRUE	FALSE	S2_6027		S2_6027		2.32352e+06
TGRH88_018740	KAF4646087.1	KAF4646087.1 | transcript=TGRH88_018740_t1 | gene=TGRH88_018740 | organism=Toxoplasma_gondii_RH-88 | gene_product=unspecified product | transcript_product=unspecified product | location=CM023081:323060-324295(-) | protein_length=411 | sequence_SO=chromosom	1	5	19.5	44.583	411	0	59.378	0//0	1//0	0//0	22761000	15	9			-1	1517400		1517400			21987000		TRUE	FALSE	FALSE	TRUE	TRUE	FALSE	S2_6027		S2_6027		3.61383e+06
TGRH88_064360	KAF4638827.1	KAF4638827.1 | transcript=TGRH88_064360_t1 | gene=TGRH88_064360 | organism=Toxoplasma_gondii_RH-88 | gene_product=putative eukaryotic initiation factor-3, subunit 3 | transcript_product=putative eukaryotic initiation factor-3, subunit 3 | location=CM023093	1	7	16.2	65.657	600	0	88.322	0//0	1//0	0//0	34752000	23	12			-1	1510900		1510900			33692000		TRUE	FALSE	FALSE	TRUE	TRUE	FALSE	S2_6027		S2_6027		4.95741e+06
TGRH88_001760	KAF4645690.1	KAF4645690.1 | transcript=TGRH88_001760_t1 | gene=TGRH88_001760 | organism=Toxoplasma_gondii_RH-88 | gene_product=unspecified product | transcript_product=unspecified product | location=CM023083:1535464-1537019(-) | protein_length=239 | sequence_SO=chromos	1	5	35.6	27.46	239	0	323.31	0//0	1//0	0//0	25509000	17	17			-1	1500500		1500500			24598000		TRUE	FALSE	FALSE	TRUE	TRUE	FALSE	S2_6027		S2_6027		3.93397e+06
TGRH88_045970	KAF4640671.1	KAF4640671.1 | transcript=TGRH88_045970_t1 | gene=TGRH88_045970 | organism=Toxoplasma_gondii_RH-88 | gene_product=EF-1 guanine nucleotide exchange domain-containing protein | transcript_product=EF-1 guanine nucleotide exchange domain-containing protein | l	1	4	24.4	36.029	328	0	59.17	0//0	1//0	0//0	25424000	17	11			-1	1495500		1495500			24443000		TRUE	FALSE	FALSE	TRUE	TRUE	FALSE	S2_6027		S2_6027		4.8259e+06
TGRH88_033530	KAF4642628.1	KAF4642628.1 | transcript=TGRH88_033530_t1 | gene=TGRH88_033530 | organism=Toxoplasma_gondii_RH-88 | gene_product=unspecified product | transcript_product=unspecified product | location=CM023088:1023758-1025435(-) | protein_length=207 | sequence_SO=chromos	1	4	26.1	22.522	207	0	38.27	0//0	1//0	0//0	16408000	11	5			-1	1491600		1491600			15909000		TRUE	FALSE	FALSE	TRUE	TRUE	FALSE	S2_6027		S2_6027		3.0496e+06
TGRH88_027910	KAF4643124.1	KAF4643124.1 | transcript=TGRH88_027910_t1 | gene=TGRH88_027910 | organism=Toxoplasma_gondii_RH-88 | gene_product=putative heat shock protein 90 | transcript_product=putative heat shock protein 90 | location=CM023087:354457-358121(-) | protein_length=853 |	1	14	22	97.553	853	0	221.01	0//0	1//0	0//0	70067000	47	30			-1	1490800		1490800			67766000		TRUE	FALSE	FALSE	TRUE	TRUE	FALSE	S2_6027		S2_6027		6.25628e+06
TGRH88_051410	KAF4639369.1	KAF4639369.1 | transcript=TGRH88_051410_t1 | gene=TGRH88_051410 | organism=Toxoplasma_gondii_RH-88 | gene_product=unspecified product | transcript_product=unspecified product | location=CM023092:2516255-2517730(-) | protein_length=199 | sequence_SO=chromos	1	2	16.1	22.26	199	0	20.386	0//0	1//0	0//0	12688000	9	7			-1	1409700		1409700			12210000		TRUE	FALSE	FALSE	TRUE	TRUE	FALSE	S2_6027		S2_6027		2.40835e+06
TGRH88_038870	KAF4639962.1	KAF4639962.1 | transcript=TGRH88_038870_t1 | gene=TGRH88_038870 | organism=Toxoplasma_gondii_RH-88 | gene_product=rhoptry protein ROP8 | transcript_product=rhoptry protein ROP8 | location=CM023091:381137-382864(-) | protein_length=575 | sequence_SO=chromos	1	3	12.9	65.407	575	0	42.445	0//0	1//0	0//0	39023000	28	12			-1	1393700		1393700			37703000		TRUE	FALSE	FALSE	TRUE	TRUE	FALSE	S2_6027		S2_6027		7.40737e+06
TGRH88_029860	KAF4643320.1	KAF4643320.1 | transcript=TGRH88_029860_t1 | gene=TGRH88_029860 | organism=Toxoplasma_gondii_RH-88 | gene_product=cAMP-dependent protein kinase regulatory subunit | transcript_product=cAMP-dependent protein kinase regulatory subunit | location=CM023087:183	1	6	21.3	42.796	385	0	102.89	0//0	1//0	0//0	30341000	22	15			-1	1379100		1379100			29237000		TRUE	FALSE	FALSE	TRUE	TRUE	FALSE	S2_6027		S2_6027		4.89021e+06
TGRH88_070180	KAF4641208.1	KAF4641208.1 | transcript=TGRH88_070180_t1 | gene=TGRH88_070180 | organism=Toxoplasma_gondii_RH-88 | gene_product=unspecified product | transcript_product=unspecified product | location=CM023089:2495475-2497335(-) | protein_length=157 | sequence_SO=chromos	1	3	17.8	17.94	157	0	34.561	0//0	1//0	0//0	14695000	11	6			-1	1335900		1335900			14206000		TRUE	FALSE	FALSE	TRUE	TRUE	FALSE	S2_6027		S2_6027		2.78943e+06
TGRH88_031730	KAF4643507.1	KAF4643507.1 | transcript=TGRH88_031730_t1 | gene=TGRH88_031730 | organism=Toxoplasma_gondii_RH-88 | gene_product=ribosomal protein RPS7 | transcript_product=ribosomal protein RPS7 | location=CM023087:3237726-3238826(-) | protein_length=196 | sequence_SO=c	1	5	41.8	22.587	196	0	73.958	0//0	1//0	0//0	14605000	11	9			-1	1327700		1327700			14111000		TRUE	FALSE	FALSE	TRUE	TRUE	FALSE	S2_6027		S2_6027		2.21957e+06
TGRH88_026860	KAF4643930.1	KAF4643930.1 | transcript=TGRH88_026860_t1 | gene=TGRH88_026860 | organism=Toxoplasma_gondii_RH-88 | gene_product=ATP synthase F1, delta subunit protein | transcript_product=ATP synthase F1, delta subunit protein | location=CM023086:2768145-2769937(-) | pr	1	6	29	27.635	252	0	66.74	0//0	1//0	0//0	20606000	16	11			-1	1287900		1287900			19875000		TRUE	FALSE	FALSE	TRUE	TRUE	FALSE	S2_6027		S2_6027		2.91188e+06
TGRH88_008470	KAF4645031.1	KAF4645031.1 | transcript=TGRH88_008470_t1 | gene=TGRH88_008470 | organism=Toxoplasma_gondii_RH-88 | gene_product=protein disulfide isomerase | transcript_product=protein disulfide isomerase | location=CM023085:1648297-1650121(+) | protein_length=471 | seq	1	9	26.1	52.801	471	0	88.765	1//0	1//0	0//0	32767000	25	19			-1	1310700	29118	1281600		8761900	30743000		FALSE	TRUE	FALSE	TRUE	TRUE	FALSE		S1_M	S2_6027	2.52616e+06	3.12976e+06		1.81094	0.692307692307692					0.309103	0.560975609756098
TGRH88_014870	KAF4644493.1	KAF4644493.1 | transcript=TGRH88_014870_t1 | gene=TGRH88_014870 | organism=Toxoplasma_gondii_RH-88 | gene_product=NAD/NADP octopine/nopaline dehydrogenase, alpha-helical domain-containing protein | transcript_product=NAD/NADP octopine/nopaline dehydrogenas	1	11	44.4	48.072	435	0	216.75	0//0	1//0	0//0	25524000	20	23			-1	1276200		1276200			24636000		TRUE	FALSE	FALSE	TRUE	TRUE	FALSE	S2_6027		S2_6027		2.6294e+06
TGRH88_008000	KAF4644984.1	KAF4644984.1 | transcript=TGRH88_008000_t1 | gene=TGRH88_008000 | organism=Toxoplasma_gondii_RH-88 | gene_product=unspecified product | transcript_product=unspecified product | location=CM023085:1254551-1257179(+) | protein_length=219 | sequence_SO=chromos	1	3	19.6	24.27	219	0	55.549	0//0	1//0	0//0	10068000	8	9			-1	1258600		1258600			9722500		TRUE	FALSE	FALSE	TRUE	TRUE	FALSE	S2_6027		S2_6027		1.91118e+06
TGRH88_039180	KAF4639993.1	KAF4639993.1 | transcript=TGRH88_039180_t1 | gene=TGRH88_039180 | organism=Toxoplasma_gondii_RH-88 | gene_product=unspecified product | transcript_product=unspecified product | location=CM023091:580438-584820(+) | protein_length=244 | sequence_SO=chromosom	1	4	18.9	27.554	244	0	207.36	0//0	1//0	0//0	18567000	15	7			-1	1237800		1237800			17953000		TRUE	FALSE	FALSE	TRUE	TRUE	FALSE	S2_6027		S2_6027		3.15517e+06
TGRH88_013340	KAF4644341.1	KAF4644341.1 | transcript=TGRH88_013340_t1 | gene=TGRH88_013340 | organism=Toxoplasma_gondii_RH-88 | gene_product=FAD Malate-dehydrogenase (MDH-FAD) | transcript_product=FAD Malate-dehydrogenase (MDH-FAD) | location=CM023090:2647216-2651412(-) | protein_le	1	6	11.8	60.336	550	0	87.219	0//0	1//0	0//0	27339000	23	11			-1	1188700		1188700			26358000		TRUE	FALSE	FALSE	TRUE	TRUE	FALSE	S2_6027		S2_6027		4.49964e+06
TGRH88_018990	KAF4646112.1	KAF4646112.1 | transcript=TGRH88_018990_t1 | gene=TGRH88_018990 | organism=Toxoplasma_gondii_RH-88 | gene_product=profilin PRF | transcript_product=profilin PRF | location=CM023081:516916-518257(-) | protein_length=163 | sequence_SO=chromosome | SO=protein	1	2	20.2	17.555	163	0	19.813	0//0	1//0	0//0	9395500	8	4			-1	1174400		1174400			9057300		TRUE	FALSE	FALSE	TRUE	TRUE	FALSE	S2_6027		S2_6027		1.78346e+06
TGRH88_074750	KAF4641665.1	KAF4641665.1 | transcript=TGRH88_074750_t1 | gene=TGRH88_074750 | organism=Toxoplasma_gondii_RH-88 | gene_product=unspecified product | transcript_product=unspecified product | location=CM023089:5829760-5841766(-) | protein_length=1254 | sequence_SO=chromo	1	11	12.1	139.08	1254	0	231.01	0//0	1//0	0//0	71466000	61	26			-1	1171600		1171600			69304000		TRUE	FALSE	FALSE	TRUE	TRUE	FALSE	S2_6027		S2_6027		7.22865e+06
TGRH88_042550	KAF4640330.1	KAF4640330.1 | transcript=TGRH88_042550_t1 | gene=TGRH88_042550 | organism=Toxoplasma_gondii_RH-88 | gene_product=unspecified product | transcript_product=unspecified product | location=CM023091:3212023-3213494(-) | protein_length=347 | sequence_SO=chromos	1	5	18.4	38.654	347	0	52.935	0//0	1//0	0//0	18534000	16	6			-1	1158400		1158400			17924000		TRUE	FALSE	FALSE	TRUE	TRUE	FALSE	S2_6027		S2_6027		2.69356e+06
TGRH88_007550	KAF4644940.1	KAF4644940.1 | transcript=TGRH88_007550_t1 | gene=TGRH88_007550 | organism=Toxoplasma_gondii_RH-88 | gene_product=microneme protein MIC3 | transcript_product=microneme protein MIC3 | location=CM023085:922722-923995(+) | protein_length=383 | sequence_SO=chr	1	6	25.3	40.528	383	0	48.542	0//0	1//0	0//0	21256000	19	10			-1	1118700		1118700			20575000		TRUE	FALSE	FALSE	TRUE	TRUE	FALSE	S2_6027		S2_6027		2.85366e+06
TGRH88_024520	KAF4643697.1	KAF4643697.1 | transcript=TGRH88_024520_t1 | gene=TGRH88_024520 | organism=Toxoplasma_gondii_RH-88 | gene_product=SAG-related sequence SRS25 | transcript_product=SAG-related sequence SRS25 | location=CM023086:931012-931587(-) | protein_length=191 | sequenc	1	2	21.5	20.782	191	0	15.494	0//0	1//0	0//0	4406500	4	3			-1	1101600		1101600			4295600		TRUE	FALSE	FALSE	TRUE	TRUE	FALSE	S2_6027		S2_6027		836455
TGRH88_019670	KAF4646180.1	KAF4646180.1 | transcript=TGRH88_019670_t1 | gene=TGRH88_019670 | organism=Toxoplasma_gondii_RH-88 | gene_product=translation initiation factor 3 subunit | transcript_product=translation initiation factor 3 subunit | location=CM023081:1060177-1064775(-) |	1	4	26.7	31.812	277	0	31.489	0//0	1//0	0//0	9902300	9	7			-1	1100300		1100300			8138400		TRUE	FALSE	FALSE	TRUE	TRUE	FALSE	S2_6027		S2_6027		1.78831e+06
TGRH88_057140	KAF4638105.1	KAF4638105.1 | transcript=TGRH88_057140_t1 | gene=TGRH88_057140 | organism=Toxoplasma_gondii_RH-88 | gene_product=putative syntaxin 6 | transcript_product=putative syntaxin 6 | location=CM023093:128746-131846(-) | protein_length=237 | sequence_SO=chromosom	1	2	11.8	26.962	237	0	323.31	0//0	1//0	0//0	13857000	13	8			-1	1065900		1065900			13537000		TRUE	FALSE	FALSE	TRUE	TRUE	FALSE	S2_6027		S2_6027		2.63035e+06
TGRH88_047040	KAF4640778.1	KAF4640778.1 | transcript=TGRH88_047040_t1 | gene=TGRH88_047040 | organism=Toxoplasma_gondii_RH-88 | gene_product=dense granule protein GRA2 | transcript_product=dense granule protein GRA2 | location=CM023091:6701310-6702108(+) | protein_length=185 | seque	1	2	11.9	19.872	185	0	24.215	1//0	1//0	0//0	16424000	10	7			-1	1642400	590920	1051500		70818000	5855400		FALSE	TRUE	FALSE	TRUE	TRUE	FALSE		S1_M	S2_6027	2.05061e+07	1.99593e+06		-3.59628	0.0256410256410256					-3.36092	0.0731707317073171
TGRH88_067730	KAF4640965.1	KAF4640965.1 | transcript=TGRH88_067730_t1 | gene=TGRH88_067730 | organism=Toxoplasma_gondii_RH-88 | gene_product=unspecified product | transcript_product=unspecified product | location=CM023089:671693-673181(+) | protein_length=235 | sequence_SO=chromosom	1	3	22.1	24.896	235	0	65.297	0//0	1//0	0//0	6186700	6	7			-1	1031100		1031100			5946900		TRUE	FALSE	FALSE	TRUE	TRUE	FALSE	S2_6027		S2_6027		1.17436e+06
TGRH88_039230	KAF4639998.1	KAF4639998.1 | transcript=TGRH88_039230_t1 | gene=TGRH88_039230 | organism=Toxoplasma_gondii_RH-88 | gene_product=putative TIM10 family protein | transcript_product=putative TIM10 family protein | location=CM023091:595653-596131(+) | protein_length=73 | se	1	2	34.2	8.0721	73	0	15.095	0//0	1//0	0//0	5056500	5	3			-1	1011300		1011300			4888600		TRUE	FALSE	FALSE	TRUE	TRUE	FALSE	S2_6027		S2_6027		959818
TGRH88_064100	KAF4638801.1	KAF4638801.1 | transcript=TGRH88_064100_t1 | gene=TGRH88_064100 | organism=Toxoplasma_gondii_RH-88 | gene_product=SAC3/GANP family protein | transcript_product=SAC3/GANP family protein | location=CM023093:5317598-5321604(+) | protein_length=376 | sequence_	1	3	11.2	41.072	376	0	31.258	0//0	1//0	0//0	12029000	12	6			-1	1002400		1002400			11624000		TRUE	FALSE	FALSE	TRUE	TRUE	FALSE	S2_6027		S2_6027		2.28338e+06
TGRH88_039020	KAF4639977.1	KAF4639977.1 | transcript=TGRH88_039020_t1 | gene=TGRH88_039020 | organism=Toxoplasma_gondii_RH-88 | gene_product=flavoprotein subunit of succinate dehydrogenase | transcript_product=flavoprotein subunit of succinate dehydrogenase | location=CM023091:49447	1	6	13.6	72.733	669	0	120.27	0//0	1//0	0//0	36962000	37	14			-1	998970		998970			35773000		TRUE	FALSE	FALSE	TRUE	TRUE	FALSE	S2_6027		S2_6027		5.86746e+06
TGRH88_029740	KAF4643307.1	KAF4643307.1 | transcript=TGRH88_029740_t1 | gene=TGRH88_029740 | organism=Toxoplasma_gondii_RH-88 | gene_product=ribosomal protein RPS5 | transcript_product=ribosomal protein RPS5 | location=CM023087:1752239-1753308(+) | protein_length=192 | sequence_SO=c	1	4	29.2	21.613	192	0	144.48	0//0	1//0	0//0	10847000	11	9			-1	986080		986080			10491000		TRUE	FALSE	FALSE	TRUE	TRUE	FALSE	S2_6027		S2_6027		1.80446e+06
TGRH88_041530	KAF4640228.1	KAF4640228.1 | transcript=TGRH88_041530_t1 | gene=TGRH88_041530 | organism=Toxoplasma_gondii_RH-88 | gene_product=fructose-1,6-bisphosphate aldolase | transcript_product=fructose-1,6-bisphosphate aldolase | location=CM023091:2285522-2287560(-) | protein_le	2	7	26.1	46.96	433	0	204.8	1//0	1//0	0//0	27290000	27	17			-1;-1	1010700	43029	967710		12932000	25767000		FALSE	TRUE	FALSE	TRUE	TRUE	FALSE		S1_M	S2_6027	4.03157e+06	2.98058e+06		0.994579	0.41025641025641					-0.435748	0.341463414634146
TGRH88_052360	KAF4639464.1	KAF4639464.1 | transcript=TGRH88_052360_t1 | gene=TGRH88_052360 | organism=Toxoplasma_gondii_RH-88 | gene_product=eukaryotic initiation factor-2, alpha subunit | transcript_product=eukaryotic initiation factor-2, alpha subunit | location=CM023092:3247071-3	1	5	21.6	39.126	347	0	36.622	0//0	1//0	0//0	19158000	20	8			-1	957920		957920			18435000		TRUE	FALSE	FALSE	TRUE	TRUE	FALSE	S2_6027		S2_6027		2.87033e+06
TGRH88_015120	KAF4644518.1	KAF4644518.1 | transcript=TGRH88_015120_t1 | gene=TGRH88_015120 | organism=Toxoplasma_gondii_RH-88 | gene_product=leucyl aminopeptidase LAP | transcript_product=leucyl aminopeptidase LAP | location=CM023090:3893145-3898266(+) | protein_length=781 | sequenc	1	12	25.5	83.189	781	0	270.41	1//0	1//0	0//0	48351000	50	22			-1	967020	26943	940080		18251000	43248000		FALSE	TRUE	FALSE	TRUE	TRUE	FALSE		S1_M	S2_6027	4.67483e+06	5.83338e+06		1.24466	0.512820512820513					0.319417	0.585365853658537
TGRH88_040220	KAF4640097.1	KAF4640097.1 | transcript=TGRH88_040220_t1 | gene=TGRH88_040220 | organism=Toxoplasma_gondii_RH-88 | gene_product=DJ-1 family protein | transcript_product=DJ-1 family protein | location=CM023091:1319665-1321492(-) | protein_length=256 | sequence_SO=chromos	1	3	15.6	27.904	256	0	24.155	0//0	1//0	0//0	11217000	12	7			-1	934740		934740			10824000		TRUE	FALSE	FALSE	TRUE	TRUE	FALSE	S2_6027		S2_6027		2.12916e+06
TGRH88_008360	KAF4645020.1	KAF4645020.1 | transcript=TGRH88_008360_t1 | gene=TGRH88_008360 | organism=Toxoplasma_gondii_RH-88 | gene_product=MSP (Major sperm protein) domain-containing protein | transcript_product=MSP (Major sperm protein) domain-containing protein | location=CM0230	1	3	25.1	25.975	239	0	25.434	0//0	1//0	0//0	9337300	10	6			-1	933730		933730			9052100		TRUE	FALSE	FALSE	TRUE	TRUE	FALSE	S2_6027		S2_6027		1.77241e+06
TGRH88_077980	KAF4641986.1	KAF4641986.1 | transcript=TGRH88_077980_t1 | gene=TGRH88_077980 | organism=Toxoplasma_gondii_RH-88 | gene_product=2-oxoglutarate/malate translocase OMT | transcript_product=2-oxoglutarate/malate translocase OMT | location=CM023089:8154853-8157467(+) | prot	1	6	31.9	35.071	323	0	224.73	0//0	1//0	0//0	18415000	20	17			-1	920730		920730			17803000		TRUE	FALSE	FALSE	TRUE	TRUE	FALSE	S2_6027		S2_6027		2.40367e+06
TGRH88_038120	KAF4643083.1	KAF4643083.1 | transcript=TGRH88_038120_t1 | gene=TGRH88_038120 | organism=Toxoplasma_gondii_RH-88 | gene_product=unspecified product | transcript_product=unspecified product | location=CM023088:4536247-4539951(-) | protein_length=310 | sequence_SO=chromos	1	4	19.7	35.195	310	0	37.01	0//0	1//0	0//0	12398000	14	8			-1	885550		885550			11963000		TRUE	FALSE	FALSE	TRUE	TRUE	FALSE	S2_6027		S2_6027		2.27642e+06
TGRH88_076800	KAF4641868.1	KAF4641868.1 | transcript=TGRH88_076800_t1 | gene=TGRH88_076800 | organism=Toxoplasma_gondii_RH-88 | gene_product=ribosomal protein RPS3A | transcript_product=ribosomal protein RPS3A | location=CM023089:7341654-7343042(+) | protein_length=259 | sequence_SO	1	4	23.6	29.371	259	0	24.03	0//0	1//0	0//0	13068000	15	7			-1	871220		871220			12650000		TRUE	FALSE	FALSE	TRUE	TRUE	FALSE	S2_6027		S2_6027		2.22882e+06
TGRH88_081010	KAF4642286.1	KAF4642286.1 | transcript=TGRH88_081010_t1 | gene=TGRH88_081010 | organism=Toxoplasma_gondii_RH-88 | gene_product=unspecified product | transcript_product=unspecified product | location=CM023089:10367388-10368629(+) | protein_length=252 | sequence_SO=chrom	1	2	9.5	28.19	252	0	50.825	0//0	1//0	0//0	13908000	16	3			-1	869240		869240			13418000		TRUE	FALSE	FALSE	TRUE	TRUE	FALSE	S2_6027		S2_6027		2.63998e+06
TGRH88_068800	KAF4641071.1	KAF4641071.1 | transcript=TGRH88_068800_t1 | gene=TGRH88_068800 | organism=Toxoplasma_gondii_RH-88 | gene_product=SAC3/GANP family protein | transcript_product=SAC3/GANP family protein | location=CM023089:1430364-1431898(+) | protein_length=269 | sequence_	1	4	22.7	29.693	269	0	51.247	0//0	1//0	0//0	11234000	13	6			-1	864170		864170			10820000		TRUE	FALSE	FALSE	TRUE	TRUE	FALSE	S2_6027		S2_6027		1.94983e+06
TGRH88_011050	KAF4644107.1;KAF4645583.1;KAF4640374.1	KAF4644107.1 | transcript=TGRH88_011050_t1 | gene=TGRH88_011050 | organism=Toxoplasma_gondii_RH-88 | gene_product=beta-tubulin | transcript_product=beta-tubulin | location=CM023090:918258-920313(-) | protein_length=449 | sequence_SO=chromosome | SO=protein	3	5	15.6	50.073	449	0	35.222	0//0	1//0	0//0	16160000	19	11			-1;-1;-1	850520		850520			15614000		TRUE	FALSE	FALSE	TRUE	TRUE	FALSE	S2_6027		S2_6027		2.55902e+06
TGRH88_045270	KAF4640601.1	KAF4640601.1 | transcript=TGRH88_045270_t1 | gene=TGRH88_045270 | organism=Toxoplasma_gondii_RH-88 | gene_product=phosphatidylserine decarboxylase | transcript_product=phosphatidylserine decarboxylase | location=CM023091:5400373-5404101(-) | protein_length	1	2	4.9	48.394	427	0	12.272	0//0	1//0	0//0	20653000	25	4			-1	826120		826120			19923000		TRUE	FALSE	FALSE	TRUE	TRUE	FALSE	S2_6027		S2_6027		3.92031e+06
TGRH88_064880	KAF4638879.1	KAF4638879.1 | transcript=TGRH88_064880_t1 | gene=TGRH88_064880 | organism=Toxoplasma_gondii_RH-88 | gene_product=putative phosphate carrier | transcript_product=putative phosphate carrier | location=CM023093:5790354-5793795(-) | protein_length=479 | seque	1	5	12.5	53.093	479	0	71.907	0//0	1//0	0//0	21144000	26	11			-1	813240		813240			20399000		TRUE	FALSE	FALSE	TRUE	TRUE	FALSE	S2_6027		S2_6027		3.21149e+06
TGRH88_081490	KAF4642334.1	KAF4642334.1 | transcript=TGRH88_081490_t1 | gene=TGRH88_081490 | organism=Toxoplasma_gondii_RH-88 | gene_product=proteasome regulatory subunit | transcript_product=proteasome regulatory subunit | location=CM023089:10699490-10702670(-) | protein_length=314	1	3	13.7	35.261	314	0	38.164	0//0	1//0	0//0	12106000	15	7			-1	807080		807080			11696000		TRUE	FALSE	FALSE	TRUE	TRUE	FALSE	S2_6027		S2_6027		2.298e+06
TGRH88_041950	KAF4640270.1	KAF4640270.1 | transcript=TGRH88_041950_t1 | gene=TGRH88_041950 | organism=Toxoplasma_gondii_RH-88 | gene_product=putative eukaryotic initiation factor-2 beta | transcript_product=putative eukaryotic initiation factor-2 beta | location=CM023091:2604550-260	1	4	25.1	26.233	231	0	34.952	0//0	1//0	0//0	11769000	15	5			-1	784590		784590			11346000		TRUE	FALSE	FALSE	TRUE	TRUE	FALSE	S2_6027		S2_6027		1.93755e+06
TGRH88_047540	KAF4640828.1	KAF4640828.1 | transcript=TGRH88_047540_t1 | gene=TGRH88_047540 | organism=Toxoplasma_gondii_RH-88 | gene_product=putative eukaryotic initiation factor-3, subunit 5 | transcript_product=putative eukaryotic initiation factor-3, subunit 5 | location=CM023091	1	2	9.5	38.069	346	0	64.196	0//0	1//0	0//0	14662000	19	9			-1	771690		771690			14047000		TRUE	FALSE	FALSE	TRUE	TRUE	FALSE	S2_6027		S2_6027		2.78315e+06
TGRH88_054990	KAF4639727.1	KAF4639727.1 | transcript=TGRH88_054990_t1 | gene=TGRH88_054990 | organism=Toxoplasma_gondii_RH-88 | gene_product=unspecified product | transcript_product=unspecified product | location=CM023092:5278499-5278759(+) | protein_length=86 | sequence_SO=chromoso	1	2	24.4	10.033	86	0	10.92	0//0	1//0	0//0	3821200	5	1			-1	764240		764240			3705600		TRUE	FALSE	FALSE	TRUE	TRUE	FALSE	S2_6027		S2_6027		725329
TGRH88_064560	KAF4638847.1	KAF4638847.1 | transcript=TGRH88_064560_t1 | gene=TGRH88_064560 | organism=Toxoplasma_gondii_RH-88 | gene_product=putative seryl-tRNA synthetase, cytoplasmic | transcript_product=putative seryl-tRNA synthetase, cytoplasmic | location=CM023093:5611948-56133	1	7	20.7	54.146	482	0	43.944	0//0	1//0	0//0	22747000	30	12			-1	758240		758240			21975000		TRUE	FALSE	FALSE	TRUE	TRUE	FALSE	S2_6027		S2_6027		3.10352e+06
TGRH88_036510	KAF4642922.1	KAF4642922.1 | transcript=TGRH88_036510_t1 | gene=TGRH88_036510 | organism=Toxoplasma_gondii_RH-88 | gene_product=GAPM1a | transcript_product=GAPM1a | location=CM023088:3366958-3369020(-) | protein_length=305 | sequence_SO=chromosome | SO=protein_coding_ge	1	2	16.1	33.534	305	0	31.883	0//0	1//0	0//0	4520200	6	3			-1	753370		753370			4270600		TRUE	FALSE	FALSE	TRUE	TRUE	FALSE	S2_6027		S2_6027		858037
TGRH88_063000	KAF4638692.1	KAF4638692.1 | transcript=TGRH88_063000_t1 | gene=TGRH88_063000 | organism=Toxoplasma_gondii_RH-88 | gene_product=putative protein disulfide isomerase-related protein (provisional) | transcript_product=putative protein disulfide isomerase-related protein (	1	4	10.1	59.88	547	0	61.909	0//0	1//0	0//0	19488000	26	10			-1	749530		749530			18893000		TRUE	FALSE	FALSE	TRUE	TRUE	FALSE	S2_6027		S2_6027		3.4255e+06
TGRH88_000170	KAF4645530.1;KAF4645526.1	KAF4645530.1 | transcript=TGRH88_000170_t1 | gene=TGRH88_000170 | organism=Toxoplasma_gondii_RH-88 | gene_product=unspecified product | transcript_product=unspecified product | location=CM023083:242447-244378(+) | protein_length=451 | sequence_SO=chromosom	3	2	10.9	48.408	451	0	58.507	0//0	1//0	0//0	13445000	18	4			-1;-1;-1	746940		746940			12960000		TRUE	FALSE	FALSE	TRUE	TRUE	FALSE	S2_6027		S2_6027		2.55212e+06
TGRH88_050260	KAF4639254.1	KAF4639254.1 | transcript=TGRH88_050260_t1 | gene=TGRH88_050260 | organism=Toxoplasma_gondii_RH-88 | gene_product=emp24/gp25L/p24 family protein | transcript_product=emp24/gp25L/p24 family protein | location=CM023092:1617175-1622735(+) | protein_length=689	1	5	14.7	74.76	689	0	38.163	0//0	1//0	0//0	22272000	30	10			-1	742390		742390			21531000		TRUE	FALSE	FALSE	TRUE	TRUE	FALSE	S2_6027		S2_6027		3.92159e+06
TGRH88_014590	KAF4644465.1	KAF4644465.1 | transcript=TGRH88_014590_t1 | gene=TGRH88_014590 | organism=Toxoplasma_gondii_RH-88 | gene_product=putative eukaryotic initiation factor-3, delta subunit | transcript_product=putative eukaryotic initiation factor-3, delta subunit | location=	1	4	18.2	37.766	335	0	25.528	0//0	1//0	0//0	13793000	19	7			-1	725970		725970			13273000		TRUE	FALSE	FALSE	TRUE	TRUE	FALSE	S2_6027		S2_6027		2.25954e+06
TGRH88_065840	KAF4638975.1	KAF4638975.1 | transcript=TGRH88_065840_t1 | gene=TGRH88_065840 | organism=Toxoplasma_gondii_RH-88 | gene_product=unspecified product | transcript_product=unspecified product | location=CM023093:6508480-6509157(-) | protein_length=90 | sequence_SO=chromoso	1	2	27.8	10.041	90	0	13.124	0//0	1//0	0//0	2894100	4	4			-1	723520		723520			2785700		TRUE	FALSE	FALSE	TRUE	TRUE	FALSE	S2_6027		S2_6027		549355
TGRH88_032270	KAF4643561.1	KAF4643561.1 | transcript=TGRH88_032270_t1 | gene=TGRH88_032270 | organism=Toxoplasma_gondii_RH-88 | gene_product=putative 26s proteasome regulatory complex subunit | transcript_product=putative 26s proteasome regulatory complex subunit | location=CM023087	1	3	14.4	47.563	417	0	22.7	0//0	1//0	0//0	17572000	25	11			-1	702890		702890			16973000		TRUE	FALSE	FALSE	TRUE	TRUE	FALSE	S2_6027		S2_6027		3.33557e+06
TGRH88_074270	KAF4641617.1	KAF4641617.1 | transcript=TGRH88_074270_t1 | gene=TGRH88_074270 | organism=Toxoplasma_gondii_RH-88 | gene_product=ribosomal protein RPS23 | transcript_product=ribosomal protein RPS23 | location=CM023089:5479557-5482463(+) | protein_length=143 | sequence_SO	1	2	21.7	15.801	143	0	193.51	0//0	1//0	0//0	4873200	7	3			-1	696170		696170			4657100		TRUE	FALSE	FALSE	TRUE	TRUE	FALSE	S2_6027		S2_6027		925026
TGRH88_006730	KAF4644859.1	KAF4644859.1 | transcript=TGRH88_006730_t1 | gene=TGRH88_006730 | organism=Toxoplasma_gondii_RH-88 | gene_product=Rab11b | transcript_product=Rab11b | location=CM023085:322408-324142(+) | protein_length=226 | sequence_SO=chromosome | SO=protein_coding_gene	2	3	15.5	24.857	226	0	24.113	0//0	1//0	0//0	11184000	17	7			-1;-1	657890		657890			10720000		TRUE	FALSE	FALSE	TRUE	TRUE	FALSE	S2_6027		S2_6027		2.12298e+06
TGRH88_060120	KAF4638404.1	KAF4638404.1 | transcript=TGRH88_060120_t1 | gene=TGRH88_060120 | organism=Toxoplasma_gondii_RH-88 | gene_product=microneme protein MIC8 | transcript_product=microneme protein MIC8 | location=CM023093:2333720-2335774(+) | protein_length=684 | sequence_SO=c	1	6	14.6	74.533	684	0	49.643	0//0	1//0	0//0	18347000	28	12			-1	655250		655250			17730000		TRUE	FALSE	FALSE	TRUE	TRUE	FALSE	S2_6027		S2_6027		2.26092e+06
TGRH88_060830	KAF4638475.1	KAF4638475.1 | transcript=TGRH88_060830_t1 | gene=TGRH88_060830 | organism=Toxoplasma_gondii_RH-88 | gene_product=putative vacuolar ATP synthase subunit g | transcript_product=putative vacuolar ATP synthase subunit g | location=CM023093:2886271-2888346(+)	1	2	33.6	14.837	131	0	13.198	0//0	1//0	0//0	3845400	6	2			-1	640900		640900			3691800		TRUE	FALSE	FALSE	TRUE	TRUE	FALSE	S2_6027		S2_6027		729930
TGRH88_070240	KAF4641214.1	KAF4641214.1 | transcript=TGRH88_070240_t1 | gene=TGRH88_070240 | organism=Toxoplasma_gondii_RH-88 | gene_product=unspecified product | transcript_product=unspecified product | location=CM023089:2543358-2543918(+) | protein_length=186 | sequence_SO=chromos	1	2	21	19.535	186	0	12.998	0//0	1//0	0//0	3794000	6	3			-1	632330		632330			3666000		TRUE	FALSE	FALSE	TRUE	TRUE	FALSE	S2_6027		S2_6027		720164
TGRH88_010730	KAF4644075.1	KAF4644075.1 | transcript=TGRH88_010730_t1 | gene=TGRH88_010730 | organism=Toxoplasma_gondii_RH-88 | gene_product=ribosomal protein RPL32 | transcript_product=ribosomal protein RPL32 | location=CM023090:723600-724828(-) | protein_length=171 | sequence_SO=c	1	2	12.9	19.602	171	0	28.345	0//0	1//0	0//0	5652600	9	3			-1	628070		628070			5467500		TRUE	FALSE	FALSE	TRUE	TRUE	FALSE	S2_6027		S2_6027		1.07297e+06
TGRH88_007130	KAF4644898.1	KAF4644898.1 | transcript=TGRH88_007130_t1 | gene=TGRH88_007130 | organism=Toxoplasma_gondii_RH-88 | gene_product=transporter, major facilitator family protein | transcript_product=transporter, major facilitator family protein | location=CM023085:584527-58	1	3	13.6	62.981	588	0	37.483	0//0	1//0	0//0	9962400	16	3			-1	622650		622650			9611100		TRUE	FALSE	FALSE	TRUE	TRUE	FALSE	S2_6027		S2_6027		1.89105e+06
TGRH88_003920	KAF4645288.1	KAF4645288.1 | transcript=TGRH88_003920_t1 | gene=TGRH88_003920 | organism=Toxoplasma_gondii_RH-88 | gene_product=ribosomal protein RPL12 | transcript_product=ribosomal protein RPL12 | location=CM023084:864355-867354(+) | protein_length=165 | sequence_SO=c	1	2	16.4	17.821	165	0	17.477	0//0	1//0	0//0	5588000	9	2			-1	620890		620890			5422800		TRUE	FALSE	FALSE	TRUE	TRUE	FALSE	S2_6027		S2_6027		1.06073e+06
TGRH88_083150	KAF4642504.1	KAF4642504.1 | transcript=TGRH88_083150_t1 | gene=TGRH88_083150 | organism=Toxoplasma_gondii_RH-88 | gene_product=unspecified product | transcript_product=unspecified product | location=CM023089:11921352-11923403(-) | protein_length=169 | sequence_SO=chrom	1	2	14.8	18.815	169	0	10.973	0//0	1//0	0//0	6001800	10	1			-1	600180		600180			5991800		TRUE	FALSE	FALSE	TRUE	TRUE	FALSE	S2_6027		S2_6027		1.13926e+06
TGRH88_076470	KAF4641835.1	KAF4641835.1 | transcript=TGRH88_076470_t1 | gene=TGRH88_076470 | organism=Toxoplasma_gondii_RH-88 | gene_product=lactate dehydrogenase LDH1 | transcript_product=lactate dehydrogenase LDH1 | location=CM023089:7133895-7135422(+) | protein_length=329 | seque	1	7	29.2	35.548	329	0	59.134	0//0	1//0	0//0	12886000	22	11			-1	585740		585740			12451000		TRUE	FALSE	FALSE	TRUE	TRUE	FALSE	S2_6027		S2_6027		2.04475e+06
TGRH88_058560	KAF4638249.1	KAF4638249.1 | transcript=TGRH88_058560_t1 | gene=TGRH88_058560 | organism=Toxoplasma_gondii_RH-88 | gene_product=unspecified product | transcript_product=unspecified product | location=CM023093:1209664-1212387(+) | protein_length=326 | sequence_SO=chromos	1	3	16.3	35.253	326	0	27.542	0//0	1//0	0//0	9154300	17	6			-1	538490		538490			8830000		TRUE	FALSE	FALSE	TRUE	TRUE	FALSE	S2_6027		S2_6027		1.73767e+06
TGRH88_052560	KAF4639484.1	KAF4639484.1 | transcript=TGRH88_052560_t1 | gene=TGRH88_052560 | organism=Toxoplasma_gondii_RH-88 | gene_product=proteasome 26S regulatory subunit | transcript_product=proteasome 26S regulatory subunit | location=CM023092:3398708-3408907(+) | protein_leng	1	11	16.1	117.68	1091	0	185.81	0//0	1//0	0//0	33662000	63	28			-1	534320		534320			32162000		TRUE	FALSE	FALSE	TRUE	TRUE	FALSE	S2_6027		S2_6027		3.34236e+06
TGRH88_030540	KAF4643388.1	KAF4643388.1 | transcript=TGRH88_030540_t1 | gene=TGRH88_030540 | organism=Toxoplasma_gondii_RH-88 | gene_product=putative chaperonin cpn60 | transcript_product=putative chaperonin cpn60 | location=CM023087:2374256-2377835(-) | protein_length=667 | sequenc	1	7	17.7	72.223	667	0	110.09	0//0	1//0	0//0	16527000	32	14			-1	516480		516480			15957000		TRUE	FALSE	FALSE	TRUE	TRUE	FALSE	S2_6027		S2_6027		2.43639e+06
TGRH88_047840	KAF4640858.1	KAF4640858.1 | transcript=TGRH88_047840_t1 | gene=TGRH88_047840 | organism=Toxoplasma_gondii_RH-88 | gene_product=unspecified product | transcript_product=unspecified product | location=CM023091:7299419-7301977(-) | protein_length=328 | sequence_SO=chromos	1	4	20.4	34.744	328	0	32.62	0//0	1//0	0//0	9579500	19	8			-1	504180		504180			9227300		TRUE	FALSE	FALSE	TRUE	TRUE	FALSE	S2_6027		S2_6027		1.43029e+06
TGRH88_049140	KAF4639143.1	KAF4639143.1 | transcript=TGRH88_049140_t1 | gene=TGRH88_049140 | organism=Toxoplasma_gondii_RH-88 | gene_product=nmda receptor glutamate-binding chain | transcript_product=nmda receptor glutamate-binding chain | location=CM023092:773771-775557(+) | protei	1	2	11.3	29.275	265	0	28.481	0//0	1//0	0//0	5017700	10	4			-1	501770		501770			4874800		TRUE	FALSE	FALSE	TRUE	TRUE	FALSE	S2_6027		S2_6027		952453
TGRH88_013250	KAF4644332.1	KAF4644332.1 | transcript=TGRH88_013250_t1 | gene=TGRH88_013250 | organism=Toxoplasma_gondii_RH-88 | gene_product=heat shock protein HSP90 | transcript_product=heat shock protein HSP90 | location=CM023090:2549787-2554204(+) | protein_length=708 | sequence_	1	5	9	81.932	708	0	198.7	1//0	1//0	0//0	18999000	37	13			-1	513490	20973	492520		8487300	18184000		FALSE	TRUE	FALSE	TRUE	TRUE	FALSE		S1_M	S2_6027	2.69287e+06	2.91703e+06		1.09929	0.435897435897436					0.115354	0.536585365853659
TGRH88_060070	KAF4638398.1	KAF4638398.1 | transcript=TGRH88_060070_t1 | gene=TGRH88_060070 | organism=Toxoplasma_gondii_RH-88 | gene_product=ribosomal protein RPS8 | transcript_product=ribosomal protein RPS8 | location=CM023093:2311518-2315320(-) | protein_length=205 | sequence_SO=c	1	3	20	23.462	205	0	17.735	0//0	1//0	0//0	4819900	10	4			-1	481990		481990			4629200		TRUE	FALSE	FALSE	TRUE	TRUE	FALSE	S2_6027		S2_6027		914899
TGRH88_063870	KAF4638778.1	KAF4638778.1 | transcript=TGRH88_063870_t1 | gene=TGRH88_063870 | organism=Toxoplasma_gondii_RH-88 | gene_product=centrin 2 | transcript_product=centrin 2 | location=CM023093:5115693-5117481(-) | protein_length=170 | sequence_SO=chromosome | SO=protein_cod	1	2	28.8	19.153	170	0	12.334	0//0	1//0	0//0	4748300	10	3			-1	474830		474830			4614900		TRUE	FALSE	FALSE	TRUE	TRUE	FALSE	S2_6027		S2_6027		901325
TGRH88_002660	KAF4645780.1	KAF4645780.1 | transcript=TGRH88_002660_t1 | gene=TGRH88_002660 | organism=Toxoplasma_gondii_RH-88 | gene_product=dense granule protein DG32 | transcript_product=dense granule protein DG32 | location=CM023083:2268805-2269807(-) | protein_length=219 | seque	1	3	26	24.153	219	0	24.802	0//0	1//0	0//0	5183100	11	4			-1	471190		471190			5021200		TRUE	FALSE	FALSE	TRUE	TRUE	FALSE	S2_6027		S2_6027		983857
TGRH88_055140	KAF4639742.1	KAF4639742.1 | transcript=TGRH88_055140_t1 | gene=TGRH88_055140 | organism=Toxoplasma_gondii_RH-88 | gene_product=alpha tubulin TUBA1 | transcript_product=alpha tubulin TUBA1 | location=CM023092:5340064-5342085(+) | protein_length=453 | sequence_SO=chromos	1	5	19	50.113	453	0	64.686	0//0	1//0	0//0	9506300	21	8			-1	452680		452680			9158500		TRUE	FALSE	FALSE	TRUE	TRUE	FALSE	S2_6027		S2_6027		1.5591e+06
TGRH88_062260	KAF4638618.1	KAF4638618.1 | transcript=TGRH88_062260_t1 | gene=TGRH88_062260 | organism=Toxoplasma_gondii_RH-88 | gene_product=ribosomal protein RPL26 | transcript_product=ribosomal protein RPL26 | location=CM023093:3883621-3884639(-) | protein_length=141 | sequence_SO	1	2	16.3	16.309	141	0	11.08	0//0	1//0	0//0	3077100	7	2			-1	439590		439590			2968600		TRUE	FALSE	FALSE	TRUE	TRUE	FALSE	S2_6027		S2_6027		584104
TGRH88_021020	KAF4645824.1	KAF4645824.1 | transcript=TGRH88_021020_t1 | gene=TGRH88_021020 | organism=Toxoplasma_gondii_RH-88 | gene_product=dynamin-related protein DRPB | transcript_product=dynamin-related protein DRPB | location=CM023082:268704-278956(-) | protein_length=860 | seq	1	10	17	95.93	860	0	92.495	0//0	1//0	0//0	19607000	45	18			-1	435710		435710			18946000		TRUE	FALSE	FALSE	TRUE	TRUE	FALSE	S2_6027		S2_6027		1.9179e+06
TGRH88_082010	KAF4642386.1	KAF4642386.1 | transcript=TGRH88_082010_t1 | gene=TGRH88_082010 | organism=Toxoplasma_gondii_RH-88 | gene_product=Mov34/MPN/PAD-1 family protein | transcript_product=Mov34/MPN/PAD-1 family protein | location=CM023089:11081212-11086064(-) | protein_length=3	1	3	11.4	38.438	343	0	26.708	0//0	1//0	0//0	7387700	17	6			-1	434570		434570			7197700		TRUE	FALSE	FALSE	TRUE	TRUE	FALSE	S2_6027		S2_6027		1.40233e+06
TGRH88_080990	KAF4642284.1	KAF4642284.1 | transcript=TGRH88_080990_t1 | gene=TGRH88_080990 | organism=Toxoplasma_gondii_RH-88 | gene_product=ribosomal protein RPS13 | transcript_product=ribosomal protein RPS13 | location=CM023089:10359072-10361332(-) | protein_length=151 | sequence_	1	2	19.2	17.176	151	0	12.597	0//0	1//0	0//0	3835000	9	3			-1	426110		426110			3739900		TRUE	FALSE	FALSE	TRUE	TRUE	FALSE	S2_6027		S2_6027		727960
TGRH88_063390	KAF4638730.1	KAF4638730.1 | transcript=TGRH88_063390_t1 | gene=TGRH88_063390 | organism=Toxoplasma_gondii_RH-88 | gene_product=putative apolipoprotein A-I binding protein | transcript_product=putative apolipoprotein A-I binding protein | location=CM023093:4767303-47721	1	2	14.8	25.892	237	0	19.604	0//0	1//0	0//0	4616000	11	7			-1	419630		419630			4451700		TRUE	FALSE	FALSE	TRUE	TRUE	FALSE	S2_6027		S2_6027		876192
TGRH88_079070	KAF4642094.1	KAF4642094.1 | transcript=TGRH88_079070_t1 | gene=TGRH88_079070 | organism=Toxoplasma_gondii_RH-88 | gene_product=unspecified product | transcript_product=unspecified product | location=CM023089:8920232-8921765(+) | protein_length=258 | sequence_SO=chromos	1	3	19	28.036	258	0	17.119	0//0	1//0	0//0	5363200	13	3			-1	412550		412550			5095000		TRUE	FALSE	FALSE	TRUE	TRUE	FALSE	S2_6027		S2_6027		1.01803e+06
TGRH88_047320	KAF4640806.1	KAF4640806.1 | transcript=TGRH88_047320_t1 | gene=TGRH88_047320 | organism=Toxoplasma_gondii_RH-88 | gene_product=putative splicing factor 3A subunit 2 | transcript_product=putative splicing factor 3A subunit 2 | location=CM023091:6890974-6893774(-) | prot	1	2	14	27.858	242	0	12.054	0//0	1//0	0//0	6937900	17	4			-1	408110		408110			6697900		TRUE	FALSE	FALSE	TRUE	TRUE	FALSE	S2_6027		S2_6027		1.31696e+06
TGRH88_033960	KAF4642670.1	KAF4642670.1 | transcript=TGRH88_033960_t1 | gene=TGRH88_033960 | organism=Toxoplasma_gondii_RH-88 | gene_product=NAC domain-containing protein | transcript_product=NAC domain-containing protein | location=CM023088:1415639-1417407(+) | protein_length=189 |	1	3	21.7	20.507	189	0	19.293	0//0	1//0	0//0	4451900	11	3			-1	404720		404720			4334600		TRUE	FALSE	FALSE	TRUE	TRUE	FALSE	S2_6027		S2_6027		845052
TGRH88_046560	KAF4640730.1	KAF4640730.1 | transcript=TGRH88_046560_t1 | gene=TGRH88_046560 | organism=Toxoplasma_gondii_RH-88 | gene_product=phosphofructokinase PFKII | transcript_product=phosphofructokinase PFKII | location=CM023091:6374503-6386466(+) | protein_length=1335 | sequen	1	8	10.1	143.17	1335	0	100.79	0//0	1//0	0//0	20103000	52	16			-1	386590		386590			19490000		TRUE	FALSE	FALSE	TRUE	TRUE	FALSE	S2_6027		S2_6027		2.18074e+06
TGRH88_040700	KAF4640145.1	KAF4640145.1 | transcript=TGRH88_040700_t1 | gene=TGRH88_040700 | organism=Toxoplasma_gondii_RH-88 | gene_product=unspecified product | transcript_product=unspecified product | location=CM023091:1728404-1730564(-) | protein_length=259 | sequence_SO=chromos	1	2	11.2	28.504	259	0	15.887	0//0	1//0	0//0	4609400	12	5			-1	384120		384120			4449100		TRUE	FALSE	FALSE	TRUE	TRUE	FALSE	S2_6027		S2_6027		874965
TGRH88_071680	KAF4641358.1	KAF4641358.1 | transcript=TGRH88_071680_t1 | gene=TGRH88_071680 | organism=Toxoplasma_gondii_RH-88 | gene_product=putative DnaJ protein | transcript_product=putative DnaJ protein | location=CM023089:3466332-3467918(-) | protein_length=397 | sequence_SO=chr	1	4	15.9	44.619	397	0	30.572	0//0	1//0	0//0	8652700	23	8			-1	376200		376200			8358400		TRUE	FALSE	FALSE	TRUE	TRUE	FALSE	S2_6027		S2_6027		1.64244e+06
TGRH88_062920	KAF4638684.1	KAF4638684.1 | transcript=TGRH88_062920_t1 | gene=TGRH88_062920 | organism=Toxoplasma_gondii_RH-88 | gene_product=bifunctional dihydrofolate reductase-thymidylate synthase | transcript_product=bifunctional dihydrofolate reductase-thymidylate synthase | loc	1	5	13.4	68.751	610	0	35.466	0//0	1//0	0//0	11843000	32	9			-1	370090		370090			11424000		TRUE	FALSE	FALSE	TRUE	TRUE	FALSE	S2_6027		S2_6027		1.52667e+06
TGRH88_058460	KAF4638238.1	KAF4638238.1 | transcript=TGRH88_058460_t1 | gene=TGRH88_058460 | organism=Toxoplasma_gondii_RH-88 | gene_product=EF-1 guanine nucleotide exchange domain-containing protein | transcript_product=EF-1 guanine nucleotide exchange domain-containing protein | l	1	2	17.6	20.734	187	0	13.653	0//0	1//0	0//0	2163600	6	3			-1	360590		360590			2098500		TRUE	FALSE	FALSE	TRUE	TRUE	FALSE	S2_6027		S2_6027		410683
TGRH88_059070	KAF4638300.1	KAF4638300.1 | transcript=TGRH88_059070_t1 | gene=TGRH88_059070 | organism=Toxoplasma_gondii_RH-88 | gene_product=putative eukaryotic porin | transcript_product=putative eukaryotic porin | location=CM023093:1640187-1645379(+) | protein_length=466 | sequenc	1	2	6	50.512	466	0	15.643	0//0	1//0	0//0	7193700	20	4			-1	359690		359690			6903700		TRUE	FALSE	FALSE	TRUE	TRUE	FALSE	S2_6027		S2_6027		1.3655e+06
TGRH88_050160	KAF4639244.1	KAF4639244.1 | transcript=TGRH88_050160_t1 | gene=TGRH88_050160 | organism=Toxoplasma_gondii_RH-88 | gene_product=phosphorylase family protein | transcript_product=phosphorylase family protein | location=CM023092:1546465-1549567(-) | protein_length=303 | s	1	3	14.5	33.043	303	0	24.257	0//0	1//0	0//0	6454400	18	6			-1	358580		358580			6284800		TRUE	FALSE	FALSE	TRUE	TRUE	FALSE	S2_6027		S2_6027		1.22518e+06
TGRH88_044550	KAF4640529.1	KAF4640529.1 | transcript=TGRH88_044550_t1 | gene=TGRH88_044550 | organism=Toxoplasma_gondii_RH-88 | gene_product=putative adenylate kinase | transcript_product=putative adenylate kinase | location=CM023091:4865743-4868374(-) | protein_length=257 | sequenc	1	3	16	28.56	257	0	28.531	0//0	1//0	0//0	6043000	17	6			-1	355470		355470			5846700		TRUE	FALSE	FALSE	TRUE	TRUE	FALSE	S2_6027		S2_6027		1.14708e+06
TGRH88_003260	KAF4645220.1	KAF4645220.1 | transcript=TGRH88_003260_t1 | gene=TGRH88_003260 | organism=Toxoplasma_gondii_RH-88 | gene_product=CTP synthase | transcript_product=CTP synthase | location=CM023084:486725-492521(-) | protein_length=652 | sequence_SO=chromosome | SO=protein	1	4	9	70.941	652	0	35.425	0//0	1//0	0//0	10534000	30	9			-1	351120		351120			10205000		TRUE	FALSE	FALSE	TRUE	TRUE	FALSE	S2_6027		S2_6027		1.90085e+06
TGRH88_071320	KAF4641322.1	KAF4641322.1 | transcript=TGRH88_071320_t1 | gene=TGRH88_071320 | organism=Toxoplasma_gondii_RH-88 | gene_product=unspecified product | transcript_product=unspecified product | location=CM023089:3246225-3247795(+) | protein_length=151 | sequence_SO=chromos	1	2	13.2	16.684	151	0	12.377	0//0	1//0	0//0	2934400	9	2			-1	326040		326040			2825200		TRUE	FALSE	FALSE	TRUE	TRUE	FALSE	S2_6027		S2_6027		556997
TGRH88_034190	KAF4642693.1	KAF4642693.1 | transcript=TGRH88_034190_t1 | gene=TGRH88_034190 | organism=Toxoplasma_gondii_RH-88 | gene_product=ribosomal protein RPS12 | transcript_product=ribosomal protein RPS12 | location=CM023088:1548877-1550056(+) | protein_length=142 | sequence_SO	1	2	28.2	15.399	142	0	13.704	0//0	1//0	0//0	2930300	9	2			-1	325590		325590			2774600		TRUE	FALSE	FALSE	TRUE	TRUE	FALSE	S2_6027		S2_6027		556227
TGRH88_067900	KAF4640982.1	KAF4640982.1 | transcript=TGRH88_067900_t1 | gene=TGRH88_067900 | organism=Toxoplasma_gondii_RH-88 | gene_product=putative citrate synthase | transcript_product=putative citrate synthase | location=CM023089:792523-798468(+) | protein_length=625 | sequence_	1	6	13.3	69.404	625	0	39.603	0//0	1//0	0//0	8868900	29	8			-1	305820		305820			8633400		TRUE	FALSE	FALSE	TRUE	TRUE	FALSE	S2_6027		S2_6027		1.15315e+06
TGRH88_008770	KAF4645061.1	KAF4645061.1 | transcript=TGRH88_008770_t1 | gene=TGRH88_008770 | organism=Toxoplasma_gondii_RH-88 | gene_product=rhoptry protein ROP15 | transcript_product=rhoptry protein ROP15 | location=CM023085:1872462-1874932(-) | protein_length=333 | sequence_SO=chr	1	2	10.2	36.589	333	0	17.911	0//0	1//0	0//0	5797400	19	4			-1	305130		305130			5628800		TRUE	FALSE	FALSE	TRUE	TRUE	FALSE	S2_6027		S2_6027		1.10044e+06
TGRH88_023030	KAF4646026.1	KAF4646026.1 | transcript=TGRH88_023030_t1 | gene=TGRH88_023030 | organism=Toxoplasma_gondii_RH-88 | gene_product=pyridine nucleotide-disulfide oxidoreductase domain-containing protein | transcript_product=pyridine nucleotide-disulfide oxidoreductase domai	1	2	4.1	68.886	640	0	14.045	0//0	1//0	0//0	9930000	33	1			-1	300910		300910			9610300		TRUE	FALSE	FALSE	TRUE	TRUE	FALSE	S2_6027		S2_6027		1.8849e+06
TGRH88_060080	KAF4638399.1	KAF4638399.1 | transcript=TGRH88_060080_t1 | gene=TGRH88_060080 | organism=Toxoplasma_gondii_RH-88 | gene_product=mitotic checkpoint protein, BUB3 family protein | transcript_product=mitotic checkpoint protein, BUB3 family protein | location=CM023093:23168	1	3	12.7	36.574	332	0	16.733	0//0	1//0	0//0	5083800	17	4			-1	299050		299050			4898800		TRUE	FALSE	FALSE	TRUE	TRUE	FALSE	S2_6027		S2_6027		965006
TGRH88_002370	KAF4645751.1	KAF4645751.1 | transcript=TGRH88_002370_t1 | gene=TGRH88_002370 | organism=Toxoplasma_gondii_RH-88 | gene_product=T-complex protein 1 eta subunit | transcript_product=T-complex protein 1 eta subunit | location=CM023083:2006056-2013598(-) | protein_length=5	1	4	10.3	59.463	546	0	52.836	0//0	1//0	0//0	8572400	29	7			-1	295600		295600			8255100		TRUE	FALSE	FALSE	TRUE	TRUE	FALSE	S2_6027		S2_6027		1.62722e+06
TGRH88_083160	KAF4642505.1	KAF4642505.1 | transcript=TGRH88_083160_t1 | gene=TGRH88_083160 | organism=Toxoplasma_gondii_RH-88 | gene_product=hypoxanthine-xanthine-guanine phosphoribosyl transferase HXGPRT | transcript_product=hypoxanthine-xanthine-guanine phosphoribosyl transferase	1	2	8.6	31.485	279	0	12.553	0//0	1//0	0//0	3838000	13	3			-1	295230		295230			3686800		TRUE	FALSE	FALSE	TRUE	TRUE	FALSE	S2_6027		S2_6027		728531
TGRH88_022870	KAF4646011.1	KAF4646011.1 | transcript=TGRH88_022870_t1 | gene=TGRH88_022870 | organism=Toxoplasma_gondii_RH-88 | gene_product=PCI domain-containing protein | transcript_product=PCI domain-containing protein | location=CM023082:1728363-1734538(+) | protein_length=511 |	1	6	20	55.519	511	0	60.952	0//0	1//0	0//0	6149600	21	8			-1	292840		292840			5932700		TRUE	FALSE	FALSE	TRUE	TRUE	FALSE	S2_6027		S2_6027		1.00585e+06
TGRH88_069400	KAF4641131.1	KAF4641131.1 | transcript=TGRH88_069400_t1 | gene=TGRH88_069400 | organism=Toxoplasma_gondii_RH-88 | gene_product=putative 26s proteasome subunit p55 | transcript_product=putative 26s proteasome subunit p55 | location=CM023089:1849254-1856269(+) | protein_	1	3	10.1	55.049	485	0	28.475	0//0	1//0	0//0	8718700	30	8			-1	290620		290620			8419800		TRUE	FALSE	FALSE	TRUE	TRUE	FALSE	S2_6027		S2_6027		1.65498e+06
TGRH88_078500	KAF4642038.1	KAF4642038.1 | transcript=TGRH88_078500_t1 | gene=TGRH88_078500 | organism=Toxoplasma_gondii_RH-88 | gene_product=PCI domain-containing protein | transcript_product=PCI domain-containing protein | location=CM023089:8527937-8535223(+) | protein_length=595 |	1	3	8.1	66.707	595	0	23.945	0//0	1//0	0//0	10066000	35	4			-1	287610		287610			9724600		TRUE	FALSE	FALSE	TRUE	TRUE	FALSE	S2_6027		S2_6027		1.91077e+06
TGRH88_041240	KAF4640199.1	KAF4640199.1 | transcript=TGRH88_041240_t1 | gene=TGRH88_041240 | organism=Toxoplasma_gondii_RH-88 | gene_product=lysine decarboxylase family protein | transcript_product=lysine decarboxylase family protein | location=CM023091:2101266-2103900(-) | protein_	1	3	11.8	43.956	397	0	21.195	0//0	1//0	0//0	5981300	21	5			-1	284820		284820			5746700		TRUE	FALSE	FALSE	TRUE	TRUE	FALSE	S2_6027		S2_6027		1.13535e+06
TGRH88_034040	KAF4642678.1	KAF4642678.1 | transcript=TGRH88_034040_t1 | gene=TGRH88_034040 | organism=Toxoplasma_gondii_RH-88 | gene_product=putative translation elongation factor 2 family protein | transcript_product=putative translation elongation factor 2 family protein | locatio	1	5	8.5	93.088	832	0	53.034	0//0	1//0	0//0	12517000	44	7			-1	284480		284480			12056000		TRUE	FALSE	FALSE	TRUE	TRUE	FALSE	S2_6027		S2_6027		1.86254e+06
TGRH88_035550	KAF4642827.1	KAF4642827.1 | transcript=TGRH88_035550_t1 | gene=TGRH88_035550 | organism=Toxoplasma_gondii_RH-88 | gene_product=unspecified product | transcript_product=unspecified product | location=CM023088:2587448-2588327(+) | protein_length=119 | sequence_SO=chromos	1	2	31.9	13.22	119	0	18.433	0//0	1//0	0//0	2271700	8	2			-1	283960		283960			2271700		TRUE	FALSE	FALSE	TRUE	TRUE	FALSE	S2_6027		S2_6027		431218
TGRH88_021070	KAF4645829.1	KAF4645829.1 | transcript=TGRH88_021070_t1 | gene=TGRH88_021070 | organism=Toxoplasma_gondii_RH-88 | gene_product=unspecified product | transcript_product=unspecified product | location=CM023082:326162-329568(+) | protein_length=372 | sequence_SO=chromosom	1	2	9.7	40.688	372	0	28.625	0//0	1//0	0//0	5941800	21	5			-1	282940		282940			5703900		TRUE	FALSE	FALSE	TRUE	TRUE	FALSE	S2_6027		S2_6027		1.12787e+06
TGRH88_068940	KAF4641085.1	KAF4641085.1 | transcript=TGRH88_068940_t1 | gene=TGRH88_068940 | organism=Toxoplasma_gondii_RH-88 | gene_product=microneme protein MIC7 | transcript_product=microneme protein MIC7 | location=CM023089:1550855-1555009(-) | protein_length=340 | sequence_SO=c	1	3	14.1	36.34	340	0	20.92	0//0	1//0	0//0	4755400	17	4			-1	279730		279730			4586900		TRUE	FALSE	FALSE	TRUE	TRUE	FALSE	S2_6027		S2_6027		902681
TGRH88_051360	KAF4639364.1	KAF4639364.1 | transcript=TGRH88_051360_t1 | gene=TGRH88_051360 | organism=Toxoplasma_gondii_RH-88 | gene_product=apicoplast-associated thioredoxin family protein Atrx1 | transcript_product=apicoplast-associated thioredoxin family protein Atrx1 | location=	1	5	10.4	86.905	790	0	35.479	0//0	1//0	0//0	10770000	39	8			-1	276160		276160			10487000		TRUE	FALSE	FALSE	TRUE	TRUE	FALSE	S2_6027		S2_6027		1.63068e+06
TGRH88_010700	KAF4644072.1	KAF4644072.1 | transcript=TGRH88_010700_t1 | gene=TGRH88_010700 | organism=Toxoplasma_gondii_RH-88 | gene_product=DnaJ domain-containing protein | transcript_product=DnaJ domain-containing protein | location=CM023090:705660-711358(+) | protein_length=425 |	1	2	8.7	48.936	425	0	122.14	0//0	1//0	0//0	6259000	23	6			-1	272130		272130			6078700		TRUE	FALSE	FALSE	TRUE	TRUE	FALSE	S2_6027		S2_6027		1.18807e+06
TGRH88_068000	KAF4640992.1	KAF4640992.1 | transcript=TGRH88_068000_t1 | gene=TGRH88_068000 | organism=Toxoplasma_gondii_RH-88 | gene_product=ribosomal protein RPS16 | transcript_product=ribosomal protein RPS16 | location=CM023089:871566-873254(+) | protein_length=211 | sequence_SO=c	1	3	17.1	24.001	211	0	31.968	0//0	1//0	0//0	3469800	13	4			-1	266900		266900			3288000		TRUE	FALSE	FALSE	TRUE	TRUE	FALSE	S2_6027		S2_6027		658625
TGRH88_082430	KAF4642428.1	KAF4642428.1 | transcript=TGRH88_082430_t1 | gene=TGRH88_082430 | organism=Toxoplasma_gondii_RH-88 | gene_product=unspecified product | transcript_product=unspecified product | location=CM023089:11378879-11385797(+) | protein_length=617 | sequence_SO=chrom	1	5	7.5	70.039	617	0	61.589	0//0	1//0	0//0	8266000	31	8			-1	266650		266650			8008100		TRUE	FALSE	FALSE	TRUE	TRUE	FALSE	S2_6027		S2_6027		1.22714e+06
TGRH88_014200	KAF4644426.1	KAF4644426.1 | transcript=TGRH88_014200_t1 | gene=TGRH88_014200 | organism=Toxoplasma_gondii_RH-88 | gene_product=unspecified product | transcript_product=unspecified product | location=CM023090:3295504-3299542(-) | protein_length=351 | sequence_SO=chromos	1	2	9.7	38.567	351	0	14.725	0//0	1//0	0//0	5018100	19	3			-1	264110		264110			4867100		TRUE	FALSE	FALSE	TRUE	TRUE	FALSE	S2_6027		S2_6027		952533
TGRH88_043860	KAF4640460.1	KAF4640460.1 | transcript=TGRH88_043860_t1 | gene=TGRH88_043860 | organism=Toxoplasma_gondii_RH-88 | gene_product=putative thioredoxin | transcript_product=putative thioredoxin | location=CM023091:4203947-4205815(+) | protein_length=622 | sequence_SO=chrom	1	4	10.5	68.947	622	0	33.956	0//0	1//0	0//0	9219800	35	8			-1	263420		263420			8918600		TRUE	FALSE	FALSE	TRUE	TRUE	FALSE	S2_6027		S2_6027		1.50958e+06
TGRH88_017560	KAF4644762.1	KAF4644762.1 | transcript=TGRH88_017560_t1 | gene=TGRH88_017560 | organism=Toxoplasma_gondii_RH-88 | gene_product=glutathione s-transferase, n-terminal domain containing protein | transcript_product=glutathione s-transferase, n-terminal domain containing p	1	2	6.6	37.831	333	0	21.172	0//0	1//0	0//0	5502200	21	3			-1	262010		262010			5333700		TRUE	FALSE	FALSE	TRUE	TRUE	FALSE	S2_6027		S2_6027		1.04441e+06
TGRH88_032660	KAF4642541.1	KAF4642541.1 | transcript=TGRH88_032660_t1 | gene=TGRH88_032660 | organism=Toxoplasma_gondii_RH-88 | gene_product=signal peptidase | transcript_product=signal peptidase | location=CM023088:191370-194214(-) | protein_length=223 | sequence_SO=chromosome | SO	1	2	13.9	24.664	223	0	30.577	0//0	1//0	0//0	2878500	11	3			-1	261680		261680			2770800		TRUE	FALSE	FALSE	TRUE	TRUE	FALSE	S2_6027		S2_6027		546385
TGRH88_072780	KAF4641468.1	KAF4641468.1 | transcript=TGRH88_072780_t1 | gene=TGRH88_072780 | organism=Toxoplasma_gondii_RH-88 | gene_product=putative vacuolar ATP synthase subunit A | transcript_product=putative vacuolar ATP synthase subunit A | location=CM023089:4349602-4359115(-)	1	3	7.6	68.147	616	0	141.78	0//0	1//0	0//0	8547700	33	8			-1	259020		259020			8256500		TRUE	FALSE	FALSE	TRUE	TRUE	FALSE	S2_6027		S2_6027		1.62251e+06
TGRH88_078580	KAF4642046.1	KAF4642046.1 | transcript=TGRH88_078580_t1 | gene=TGRH88_078580 | organism=Toxoplasma_gondii_RH-88 | gene_product=eukaryotic translation initiation factor 3 subunit 6 interacting protein | transcript_product=eukaryotic translation initiation factor 3 subun	1	6	14.2	75.073	639	0	40.933	0//0	1//0	0//0	9174800	36	13			-1	254860		254860			8842800		TRUE	FALSE	FALSE	TRUE	TRUE	FALSE	S2_6027		S2_6027		1.49203e+06
TGRH88_057610	KAF4638153.1	KAF4638153.1 | transcript=TGRH88_057610_t1 | gene=TGRH88_057610 | organism=Toxoplasma_gondii_RH-88 | gene_product=Gpi16 subunit, GPI transamidase component protein | transcript_product=Gpi16 subunit, GPI transamidase component protein | location=CM023093:4	1	5	11.2	83.546	769	0	31.031	0//0	1//0	0//0	7208500	29	9			-1	248570		248570			6957500		TRUE	FALSE	FALSE	TRUE	TRUE	FALSE	S2_6027		S2_6027		1.00468e+06
TGRH88_000180	KAF4645531.1	KAF4645531.1 | transcript=TGRH88_000180_t1 | gene=TGRH88_000180 | organism=Toxoplasma_gondii_RH-88 | gene_product=unspecified product | transcript_product=unspecified product | location=CM023083:246830-248681(+) | protein_length=435 | sequence_SO=chromosom	1	2	29.2	48.137	435	0	11.429	0//0	1//0	0//0	5849500	24	5			-1	243730		243730			5659800		TRUE	FALSE	FALSE	TRUE	TRUE	FALSE	S2_6027		S2_6027		1.11034e+06
TGRH88_025480	KAF4643792.1	KAF4643792.1 | transcript=TGRH88_025480_t1 | gene=TGRH88_025480 | organism=Toxoplasma_gondii_RH-88 | gene_product=heat shock protein HSP28 | transcript_product=heat shock protein HSP28 | location=CM023086:1743306-1744136(+) | protein_length=276 | sequence_	1	4	21.7	31.035	276	0	53.509	0//0	1//0	0//0	4589700	19	6			-1	241560		241560			4477000		TRUE	FALSE	FALSE	TRUE	TRUE	FALSE	S2_6027		S2_6027		792939
TGRH88_057070	KAF4638098.1	KAF4638098.1 | transcript=TGRH88_057070_t1 | gene=TGRH88_057070 | organism=Toxoplasma_gondii_RH-88 | gene_product=26S proteasome regulatory subunit, S6a family AAA ATpase | transcript_product=26S proteasome regulatory subunit, S6a family AAA ATpase | locat	1	2	9.1	47.787	427	0	12.215	0//0	1//0	0//0	5327500	23	3			-1	231630		231630			5141600		TRUE	FALSE	FALSE	TRUE	TRUE	FALSE	S2_6027		S2_6027		1.01126e+06
TGRH88_007610	KAF4644946.1	KAF4644946.1 | transcript=TGRH88_007610_t1 | gene=TGRH88_007610 | organism=Toxoplasma_gondii_RH-88 | gene_product=unspecified product | transcript_product=unspecified product | location=CM023085:962665-964167(-) | protein_length=284 | sequence_SO=chromosom	1	2	9.9	29.923	284	0	14.808	0//0	1//0	0//0	3459800	15	4			-1	230650		230650			3319100		TRUE	FALSE	FALSE	TRUE	TRUE	FALSE	S2_6027		S2_6027		656744
TGRH88_039150	KAF4639990.1	KAF4639990.1 | transcript=TGRH88_039150_t1 | gene=TGRH88_039150 | organism=Toxoplasma_gondii_RH-88 | gene_product=ribosomal protein RPS24 | transcript_product=ribosomal protein RPS24 | location=CM023091:563207-564870(+) | protein_length=267 | sequence_SO=c	1	2	10.5	30.375	267	0	12.584	0//0	1//0	0//0	3273300	15	2			-1	218220		218220			3167300		TRUE	FALSE	FALSE	TRUE	TRUE	FALSE	S2_6027		S2_6027		621325
TGRH88_025560	KAF4643800.1	KAF4643800.1 | transcript=TGRH88_025560_t1 | gene=TGRH88_025560 | organism=Toxoplasma_gondii_RH-88 | gene_product=redoxin domain-containing protein | transcript_product=redoxin domain-containing protein | location=CM023086:1784678-1785556(+) | protein_leng	1	2	14.7	31.121	292	0	10.734	0//0	1//0	0//0	2615000	12	2			-1	217920		217920			2540900		TRUE	FALSE	FALSE	TRUE	TRUE	FALSE	S2_6027		S2_6027		496377
TGRH88_047270	KAF4640801.1	KAF4640801.1 | transcript=TGRH88_047270_t1 | gene=TGRH88_047270 | organism=Toxoplasma_gondii_RH-88 | gene_product=PCI domain-containing protein | transcript_product=PCI domain-containing protein | location=CM023091:6866357-6869128(+) | protein_length=506 |	1	2	4.3	55.682	506	0	12.948	0//0	1//0	0//0	4968900	23	4			-1	216040		216040			4800800		TRUE	FALSE	FALSE	TRUE	TRUE	FALSE	S2_6027		S2_6027		943194
TGRH88_054180	KAF4639646.1	KAF4639646.1 | transcript=TGRH88_054180_t1 | gene=TGRH88_054180 | organism=Toxoplasma_gondii_RH-88 | gene_product=SAG-related sequence SRS52A | transcript_product=SAG-related sequence SRS52A | location=CM023092:4716613-4718353(+) | protein_length=358 | seq	1	2	11.2	37.24	358	0	12.106	0//0	1//0	0//0	3825100	18	3			-1	212500		212500			3674800		TRUE	FALSE	FALSE	TRUE	TRUE	FALSE	S2_6027		S2_6027		726073
TGRH88_055940	KAF4639822.1	KAF4639822.1 | transcript=TGRH88_055940_t1 | gene=TGRH88_055940 | organism=Toxoplasma_gondii_RH-88 | gene_product=S15 sporozoite-expressed protein | transcript_product=S15 sporozoite-expressed protein | location=CM023092:6041679-6046530(-) | protein_length	1	2	5.6	50.24	448	0	14.147	0//0	1//0	0//0	4399800	21	4			-1	209510		209510			4278300		TRUE	FALSE	FALSE	TRUE	TRUE	FALSE	S2_6027		S2_6027		835168
TGRH88_046580	KAF4640732.1	KAF4640732.1 | transcript=TGRH88_046580_t1 | gene=TGRH88_046580 | organism=Toxoplasma_gondii_RH-88 | gene_product=unspecified product | transcript_product=unspecified product | location=CM023091:6396377-6400618(+) | protein_length=227 | sequence_SO=chromos	1	2	14.1	25.324	227	0	11.307	0//0	1//0	0//0	2445800	12	2			-1	203820		203820			2375200		TRUE	FALSE	FALSE	TRUE	TRUE	FALSE	S2_6027		S2_6027		464259
TGRH88_057700	KAF4638162.1;KAF4638164.1	KAF4638162.1 | transcript=TGRH88_057700_t1 | gene=TGRH88_057700 | organism=Toxoplasma_gondii_RH-88 | gene_product=rhoptry protein ROP5 | transcript_product=rhoptry protein ROP5 | location=CM023093:558144-559793(-) | protein_length=549 | sequence_SO=chromos	2	2	34.8	60.953	549	0	17.646	0//1	1//0	0//1	4866600	24	3			-1;-1	202770		202770			4719600		TRUE	FALSE	FALSE	TRUE	TRUE	FALSE	S2_6027		S2_6027		923773
TGRH88_067980	KAF4640990.1	KAF4640990.1 | transcript=TGRH88_067980_t1 | gene=TGRH88_067980 | organism=Toxoplasma_gondii_RH-88 | gene_product=Proteasome/cyclosome repeat-containing protein | transcript_product=Proteasome/cyclosome repeat-containing protein | location=CM023089:846650-	1	7	8	125.58	1156	0	91.627	0//0	1//0	0//0	11272000	56	11			-1	201280		201280			10905000		TRUE	FALSE	FALSE	TRUE	TRUE	FALSE	S2_6027		S2_6027		1.49533e+06
TGRH88_033800	KAF4642654.1	KAF4642654.1 | transcript=TGRH88_033800_t1 | gene=TGRH88_033800 | organism=Toxoplasma_gondii_RH-88 | gene_product=cyclophilin precursor | transcript_product=cyclophilin precursor | location=CM023088:1291173-1292219(+) | protein_length=348 | sequence_SO=chr	1	2	7.5	38.193	348	0	12.845	0//0	1//0	0//0	3778300	21	3			-1	179920		179920			3656100		TRUE	FALSE	FALSE	TRUE	TRUE	FALSE	S2_6027		S2_6027		717184
TGRH88_065740	KAF4638965.1	KAF4638965.1 | transcript=TGRH88_065740_t1 | gene=TGRH88_065740 | organism=Toxoplasma_gondii_RH-88 | gene_product=putative proteasome subunit alpha type 1 | transcript_product=putative proteasome subunit alpha type 1 | location=CM023093:6407962-6413072(-)	1	2	12.6	27.242	247	0	11.5	0//0	1//0	0//0	2558500	15	3			-1	170570		170570			2489300		TRUE	FALSE	FALSE	TRUE	TRUE	FALSE	S2_6027		S2_6027		485654
TGRH88_041610	KAF4640236.1	KAF4640236.1 | transcript=TGRH88_041610_t1 | gene=TGRH88_041610 | organism=Toxoplasma_gondii_RH-88 | gene_product=putative eukaryotic initiation factor-2 gamma | transcript_product=putative eukaryotic initiation factor-2 gamma | location=CM023091:2323209-2	1	2	9.2	50.508	465	0	14.278	0//0	1//0	0//0	3912100	23	2			-1	170090		170090			3840900		TRUE	FALSE	FALSE	TRUE	TRUE	FALSE	S2_6027		S2_6027		742597
TGRH88_068130	KAF4641005.1	KAF4641005.1 | transcript=TGRH88_068130_t1 | gene=TGRH88_068130 | organism=Toxoplasma_gondii_RH-88 | gene_product=trypsin domain-containing protein | transcript_product=trypsin domain-containing protein | location=CM023089:937530-946285(+) | protein_length	1	4	8.4	104.51	972	0	36.4	1//0	1//0	0//0	6928000	38	6			-1	182320	13875	168440		6766300	5618700		FALSE	TRUE	FALSE	TRUE	TRUE	FALSE		S1_M	S2_6027	1.82962e+06	1.13226e+06		-0.268131	0.282051282051282					-0.69234	0.317073170731707
TGRH88_051520	KAF4639380.1	KAF4639380.1 | transcript=TGRH88_051520_t1 | gene=TGRH88_051520 | organism=Toxoplasma_gondii_RH-88 | gene_product=rhoptry protein ROP13 | transcript_product=rhoptry protein ROP13 | location=CM023092:2605224-2606426(-) | protein_length=400 | sequence_SO=chr	1	2	8.8	44.729	400	0	28.863	0//0	1//0	0//0	2971500	18	4			-1	165080		165080			2864700		TRUE	FALSE	FALSE	TRUE	TRUE	FALSE	S2_6027		S2_6027		564044
TGRH88_014770	KAF4644483.1	KAF4644483.1 | transcript=TGRH88_014770_t1 | gene=TGRH88_014770 | organism=Toxoplasma_gondii_RH-88 | gene_product=putative proteasome subunit beta type 1 | transcript_product=putative proteasome subunit beta type 1 | location=CM023090:3643114-3647972(-) |	1	2	11.4	39.899	359	0	11.929	0//0	1//0	0//0	2388500	15	2			-1	159230		159230			2293900		TRUE	FALSE	FALSE	TRUE	TRUE	FALSE	S2_6027		S2_6027		453383
TGRH88_061590	KAF4638551.1	KAF4638551.1 | transcript=TGRH88_061590_t1 | gene=TGRH88_061590 | organism=Toxoplasma_gondii_RH-88 | gene_product=fructose-bisphospatase II | transcript_product=fructose-bisphospatase II | location=CM023093:3438689-3442574(+) | protein_length=381 | sequenc	1	3	12.3	42.397	381	0	20.44	0//0	1//0	0//0	3298300	21	5			-1	157060		157060			3243000		TRUE	FALSE	FALSE	TRUE	TRUE	FALSE	S2_6027		S2_6027		626080
TGRH88_076180	KAF4641807.1	KAF4641807.1 | transcript=TGRH88_076180_t1 | gene=TGRH88_076180 | organism=Toxoplasma_gondii_RH-88 | gene_product=DnaJ domain-containing protein | transcript_product=DnaJ domain-containing protein | location=CM023089:6891152-6902556(-) | protein_length=869	1	2	3.7	96.156	869	0	11.618	0//0	1//0	0//0	5197800	34	2			-1	152880		152880			5032700		TRUE	FALSE	FALSE	TRUE	TRUE	FALSE	S2_6027		S2_6027		986626
TGRH88_021570	KAF4645881.1	KAF4645881.1 | transcript=TGRH88_021570_t1 | gene=TGRH88_021570 | organism=Toxoplasma_gondii_RH-88 | gene_product=unspecified product | transcript_product=unspecified product | location=CM023082:653356-655180(+) | protein_length=451 | sequence_SO=chromosom	1	2	8.4	50.2	451	0	12.585	0//0	1//0	0//0	3659400	24	4			-1	152470		152470			3530600		TRUE	FALSE	FALSE	TRUE	TRUE	FALSE	S2_6027		S2_6027		694616
TGRH88_066140	KAF4639005.1	KAF4639005.1 | transcript=TGRH88_066140_t1 | gene=TGRH88_066140 | organism=Toxoplasma_gondii_RH-88 | gene_product=putative 26S proteasome regulatory subunit 7 | transcript_product=putative 26S proteasome regulatory subunit 7 | location=CM023093:6738547-674	1	4	12.2	52.394	476	0	40.155	0//0	1//0	0//0	3637500	26	6			-1	139900		139900			3205000		TRUE	FALSE	FALSE	TRUE	TRUE	FALSE	S2_6027		S2_6027		690465
TGRH88_060750	KAF4638467.1	KAF4638467.1 | transcript=TGRH88_060750_t1 | gene=TGRH88_060750 | organism=Toxoplasma_gondii_RH-88 | gene_product=surp module domain-containing protein | transcript_product=surp module domain-containing protein | location=CM023093:2833488-2837962(-) | prot	1	3	9.4	71.701	658	0	68.397	0//0	1//0	0//0	3276100	24	4			-1	136510		136510			3160400		TRUE	FALSE	FALSE	TRUE	TRUE	FALSE	S2_6027		S2_6027		621874
TGRH88_063150	KAF4638706.1	KAF4638706.1 | transcript=TGRH88_063150_t1 | gene=TGRH88_063150 | organism=Toxoplasma_gondii_RH-88 | gene_product=glutamate/leucine/phenylalanine/valine dehydrogenase family protein | transcript_product=glutamate/leucine/phenylalanine/valine dehydrogenase	1	5	8	135.5	1206	0	38.01	0//0	1//0	0//0	7504400	56	8			-1	134010		134010			7217200		TRUE	FALSE	FALSE	TRUE	TRUE	FALSE	S2_6027		S2_6027		1.14092e+06
TGRH88_048350	KAF4639063.1	KAF4639063.1 | transcript=TGRH88_048350_t1 | gene=TGRH88_048350 | organism=Toxoplasma_gondii_RH-88 | gene_product=phenylalanine--tRNA ligase, beta subunit protein | transcript_product=phenylalanine--tRNA ligase, beta subunit protein | location=CM023092:172	1	4	8.6	74.556	675	0	30.588	0//0	1//0	0//0	4659900	35	5			-1	133140		133140			4474400		TRUE	FALSE	FALSE	TRUE	TRUE	FALSE	S2_6027		S2_6027		884538
TGRH88_010940	KAF4644096.1	KAF4644096.1 | transcript=TGRH88_010940_t1 | gene=TGRH88_010940 | organism=Toxoplasma_gondii_RH-88 | gene_product=putative 26S protease regulatory subunit 4 | transcript_product=putative 26S protease regulatory subunit 4 | location=CM023090:837851-843193(+	1	3	12.2	49.134	441	0	18.243	0//0	1//0	0//0	3539900	27	4			-1	131110		131110			3411700		TRUE	FALSE	FALSE	TRUE	TRUE	FALSE	S2_6027		S2_6027		671937
TGRH88_034070	KAF4642681.1	KAF4642681.1 | transcript=TGRH88_034070_t1 | gene=TGRH88_034070 | organism=Toxoplasma_gondii_RH-88 | gene_product=CCT chaperonin gamma subunit | transcript_product=CCT chaperonin gamma subunit | location=CM023088:1478773-1484605(+) | protein_length=556 | s	1	4	9.4	60.697	556	0	24.385	0//0	1//0	0//0	4186100	36	5			-1	116280		116280			4007000		TRUE	FALSE	FALSE	TRUE	TRUE	FALSE	S2_6027		S2_6027		794598
TGRH88_016040	KAF4644610.1	KAF4644610.1 | transcript=TGRH88_016040_t1 | gene=TGRH88_016040 | organism=Toxoplasma_gondii_RH-88 | gene_product=PCI domain-containing protein | transcript_product=PCI domain-containing protein | location=CM023090:4682507-4689314(+) | protein_length=561 |	1	2	5	61.638	561	0	13.846	0//0	1//0	0//0	4110900	36	3			-1	114190		114190			3968900		TRUE	FALSE	FALSE	TRUE	TRUE	FALSE	S2_6027		S2_6027		780333
TGRH88_074790	KAF4641669.1	KAF4641669.1 | transcript=TGRH88_074790_t1 | gene=TGRH88_074790 | organism=Toxoplasma_gondii_RH-88 | gene_product=sarco/endoplasmic reticulum Ca2+-ATPase | transcript_product=sarco/endoplasmic reticulum Ca2+-ATPase | location=CM023089:5870300-5884219(+) |	1	4	4.7	128.68	1179	0	25.965	0//0	1//0	0//0	5935800	53	4			-1	112000		112000			5701800		TRUE	FALSE	FALSE	TRUE	TRUE	FALSE	S2_6027		S2_6027		950601
TGRH88_075660	KAF4641755.1	KAF4641755.1 | transcript=TGRH88_075660_t1 | gene=TGRH88_075660 | organism=Toxoplasma_gondii_RH-88 | gene_product=unspecified product | transcript_product=unspecified product | location=CM023089:6512466-6516795(+) | protein_length=571 | sequence_SO=chromos	1	3	7.5	64.671	571	0	27.432	0//0	1//0	0//0	3909600	35	5			-1	111700		111700			3771600		TRUE	FALSE	FALSE	TRUE	TRUE	FALSE	S2_6027		S2_6027		742120
TGRH88_047560	KAF4640830.1	KAF4640830.1 | transcript=TGRH88_047560_t1 | gene=TGRH88_047560 | organism=Toxoplasma_gondii_RH-88 | gene_product=26S proteasome regulatory subunit | transcript_product=26S proteasome regulatory subunit | location=CM023091:7079284-7085834(+) | protein_leng	1	4	18.8	44.425	398	0	46.759	0//0	1//0	0//0	2565900	23	5			-1	111560		111560			2489200		TRUE	FALSE	FALSE	TRUE	TRUE	FALSE	S2_6027		S2_6027		429207
TGRH88_049410	KAF4639169.1	KAF4639169.1 | transcript=TGRH88_049410_t1 | gene=TGRH88_049410 | organism=Toxoplasma_gondii_RH-88 | gene_product=unspecified product | transcript_product=unspecified product | location=CM023092:926251-936734(+) | protein_length=3141 | sequence_SO=chromoso	1	2	2.3	333.81	3141	0	10.73	0//0	1//0	0//0	15144000	136	2			-1	111350		111350			14704000		TRUE	FALSE	FALSE	TRUE	TRUE	FALSE	S2_6027		S2_6027		2.87454e+06
TGRH88_048920	KAF4639121.1	KAF4639121.1 | transcript=TGRH88_048920_t1 | gene=TGRH88_048920 | organism=Toxoplasma_gondii_RH-88 | gene_product=putative peroxiredoxin 6 | transcript_product=putative peroxiredoxin 6 | location=CM023092:597590-600468(-) | protein_length=402 | sequence_SO	1	3	7.2	44.088	402	0	17.623	0//0	1//0	0//0	2430300	22	3			-1	110470		110470			2371900		TRUE	FALSE	FALSE	TRUE	TRUE	FALSE	S2_6027		S2_6027		461312
TGRH88_064630	KAF4638854.1	KAF4638854.1 | transcript=TGRH88_064630_t1 | gene=TGRH88_064630 | organism=Toxoplasma_gondii_RH-88 | gene_product=heat shock protein | transcript_product=heat shock protein | location=CM023093:5663814-5668796(-) | protein_length=728 | sequence_SO=chromosom	1	3	5.5	78.254	728	0	21.404	0//0	1//0	0//0	4242300	41	5			-1	103470		103470			4079300		TRUE	FALSE	FALSE	TRUE	TRUE	FALSE	S2_6027		S2_6027		805258
TGRH88_060290	KAF4638421.1	KAF4638421.1 | transcript=TGRH88_060290_t1 | gene=TGRH88_060290 | organism=Toxoplasma_gondii_RH-88 | gene_product=pyruvate dehydrogenase complex subunit PDH-E1Alpha | transcript_product=pyruvate dehydrogenase complex subunit PDH-E1Alpha | location=CM023093	1	3	7.7	67.487	635	0	27.048	0//0	1//0	0//0	2613700	26	4			-1	100530		100530			2534600		TRUE	FALSE	FALSE	TRUE	TRUE	FALSE	S2_6027		S2_6027		496134
TGRH88_078830	KAF4642070.1	KAF4642070.1 | transcript=TGRH88_078830_t1 | gene=TGRH88_078830 | organism=Toxoplasma_gondii_RH-88 | gene_product=cell division protein CDC48CY | transcript_product=cell division protein CDC48CY | location=CM023089:8773463-8782727(-) | protein_length=815 |	1	2	3.9	89.96	815	0	14.306	0//0	1//0	0//0	4055500	41	4			-1	98914		98914			3912800		TRUE	FALSE	FALSE	TRUE	TRUE	FALSE	S2_6027		S2_6027		769794
TGRH88_075460	KAF4641735.1	KAF4641735.1 | transcript=TGRH88_075460_t1 | gene=TGRH88_075460 | organism=Toxoplasma_gondii_RH-88 | gene_product=unspecified product | transcript_product=unspecified product | location=CM023089:6361540-6368200(+) | protein_length=711 | sequence_SO=chromos	1	2	3.8	77.043	711	0	12.967	0//0	1//0	0//0	2222300	23	2			-1	96621		96621			2149000		TRUE	FALSE	FALSE	TRUE	TRUE	FALSE	S2_6027		S2_6027		421835
TGRH88_078930	KAF4642080.1	KAF4642080.1 | transcript=TGRH88_078930_t1 | gene=TGRH88_078930 | organism=Toxoplasma_gondii_RH-88 | gene_product=T-complex protein 1 delta subunit | transcript_product=T-complex protein 1 delta subunit | location=CM023089:8811799-8819130(+) | protein_leng	1	2	6.6	58.674	542	0	12.85	0//0	1//0	0//0	3463500	36	2			-1	96208		96208			3362600		TRUE	FALSE	FALSE	TRUE	TRUE	FALSE	S2_6027		S2_6027		657433
TGRH88_017180	KAF4644724.1	KAF4644724.1 | transcript=TGRH88_017180_t1 | gene=TGRH88_017180 | organism=Toxoplasma_gondii_RH-88 | gene_product=ribosomal protein RPS2 | transcript_product=ribosomal protein RPS2 | location=CM023090:5571701-5574139(+) | protein_length=269 | sequence_SO=c	1	2	10	29.336	269	0	12.582	0//0	1//0	0//0	1367400	15	2			-1	91157		91157			1343600		TRUE	FALSE	FALSE	TRUE	TRUE	FALSE	S2_6027		S2_6027		259551
TGRH88_039120	KAF4639987.1	KAF4639987.1 | transcript=TGRH88_039120_t1 | gene=TGRH88_039120 | organism=Toxoplasma_gondii_RH-88 | gene_product=transporter, major facilitator family protein | transcript_product=transporter, major facilitator family protein | location=CM023091:554003-55	1	2	4.7	58.166	534	0	11.672	0//0	1//0	0//0	1452400	16	2			-1	90774		90774			1414700		TRUE	FALSE	FALSE	TRUE	TRUE	FALSE	S2_6027		S2_6027		275689
TGRH88_047240	KAF4640798.1	KAF4640798.1 | transcript=TGRH88_047240_t1 | gene=TGRH88_047240 | organism=Toxoplasma_gondii_RH-88 | gene_product=unspecified product | transcript_product=unspecified product | location=CM023091:6831778-6834242(+) | protein_length=182 | sequence_SO=chromos	1	2	19.2	20.378	182	0	23.152	0//0	1//0	0//0	977630	11	4			-1	88876		88876			925240		TRUE	FALSE	FALSE	TRUE	TRUE	FALSE	S2_6027		S2_6027		185573
TGRH88_049500	KAF4639178.1	KAF4639178.1 | transcript=TGRH88_049500_t1 | gene=TGRH88_049500 | organism=Toxoplasma_gondii_RH-88 | gene_product=putative membrane protein | transcript_product=putative membrane protein | location=CM023092:1045726-1054055(+) | protein_length=816 | sequenc	1	2	5.3	89.885	816	0	132.2	0//0	1//0	0//0	2890900	33	4			-1	87603		87603			2812600		TRUE	FALSE	FALSE	TRUE	TRUE	FALSE	S2_6027		S2_6027		548748
TGRH88_047800	KAF4640854.1	KAF4640854.1 | transcript=TGRH88_047800_t1 | gene=TGRH88_047800 | organism=Toxoplasma_gondii_RH-88 | gene_product=unspecified product | transcript_product=unspecified product | location=CM023091:7277405-7281097(+) | protein_length=394 | sequence_SO=chromos	1	2	9.1	43.249	394	0	13.653	0//0	1//0	0//0	1716300	20	2			-1	85815		85815			1654000		TRUE	FALSE	FALSE	TRUE	TRUE	FALSE	S2_6027		S2_6027		325786
TGRH88_008150	KAF4644999.1	KAF4644999.1 | transcript=TGRH88_008150_t1 | gene=TGRH88_008150 | organism=Toxoplasma_gondii_RH-88 | gene_product=putative TCP-1 chaperonin | transcript_product=putative TCP-1 chaperonin | location=CM023085:1375010-1380839(+) | protein_length=663 | sequenc	1	2	5.6	72.113	663	0	11.091	0//0	1//0	0//0	2839500	34	2			-1	83516		83516			2751800		TRUE	FALSE	FALSE	TRUE	TRUE	FALSE	S2_6027		S2_6027		538997
TGRH88_021940	KAF4645918.1	KAF4645918.1 | transcript=TGRH88_021940_t1 | gene=TGRH88_021940 | organism=Toxoplasma_gondii_RH-88 | gene_product=non-proton pumping type-II NADH dehydrogenase I | transcript_product=non-proton pumping type-II NADH dehydrogenase I | location=CM023082:93196	1	2	6.1	67.039	618	0	12.494	0//0	1//0	0//0	2738700	34	2			-1	80550		80550			2638900		TRUE	FALSE	FALSE	TRUE	TRUE	FALSE	S2_6027		S2_6027		519859
TGRH88_037280	KAF4642999.1	KAF4642999.1 | transcript=TGRH88_037280_t1 | gene=TGRH88_037280 | organism=Toxoplasma_gondii_RH-88 | gene_product=putative eukaryotic initiation factor-3 subunit 10 | transcript_product=putative eukaryotic initiation factor-3 subunit 10 | location=CM023088	1	2	1.9	119.14	1033	0	19.277	0//0	1//0	0//0	3791800	54	5			-1	70219		70219			3704600		TRUE	FALSE	FALSE	TRUE	TRUE	FALSE	S2_6027		S2_6027		719756
TGRH88_012030	KAF4644211.1	KAF4644211.1 | transcript=TGRH88_012030_t1 | gene=TGRH88_012030 | organism=Toxoplasma_gondii_RH-88 | gene_product=hexokinase | transcript_product=hexokinase | location=CM023090:1601845-1605121(-) | protein_length=468 | sequence_SO=chromosome | SO=protein_c	1	2	4.9	51.467	468	0	14.502	0//0	1//0	0//0	1619800	25	4			-1	64793		64793			1571000		TRUE	FALSE	FALSE	TRUE	TRUE	FALSE	S2_6027		S2_6027		307471
TGRH88_004880	KAF4645384.1	KAF4645384.1 | transcript=TGRH88_004880_t1 | gene=TGRH88_004880 | organism=Toxoplasma_gondii_RH-88 | gene_product=putative asparagine synthetase | transcript_product=putative asparagine synthetase | location=CM023084:1657111-1663338(-) | protein_length=588	1	2	5.3	65.868	588	0	10.806	0//0	1//0	0//0	1666400	28	2			-1	59514		59514			1639000		TRUE	FALSE	FALSE	TRUE	TRUE	FALSE	S2_6027		S2_6027		316313
TGRH88_042710	KAF4640345.1	KAF4640345.1 | transcript=TGRH88_042710_t1 | gene=TGRH88_042710 | organism=Toxoplasma_gondii_RH-88 | gene_product=putative serine hydroxymethyltransferase 2 | transcript_product=putative serine hydroxymethyltransferase 2 | location=CM023091:3360647-3364599	1	2	5.2	65.246	595	0	10.997	0//0	1//0	0//0	1305000	23	2			-1	56741		56741			1258200		TRUE	FALSE	FALSE	TRUE	TRUE	FALSE	S2_6027		S2_6027		247721
TGRH88_082060	KAF4642391.1	KAF4642391.1 | transcript=TGRH88_082060_t1 | gene=TGRH88_082060 | organism=Toxoplasma_gondii_RH-88 | gene_product=glyceraldehyde-3-phosphate dehydrogenase GAPDH2 | transcript_product=glyceraldehyde-3-phosphate dehydrogenase GAPDH2 | location=CM023089:11121	1	2	3.2	105.13	995	0	13.032	0//0	1//0	0//0	2281200	42	2			-1	54315		54315			2186900		TRUE	FALSE	FALSE	TRUE	TRUE	FALSE	S2_6027		S2_6027		433023
TGRH88_042430	KAF4640318.1	KAF4640318.1 | transcript=TGRH88_042430_t1 | gene=TGRH88_042430 | organism=Toxoplasma_gondii_RH-88 | gene_product=putative phenylalanyl-tRNA synthetase alpha chain A | transcript_product=putative phenylalanyl-tRNA synthetase alpha chain A | location=CM0230	1	2	4	67.178	598	0	11.624	0//0	1//0	0//0	1628400	30	3			-1	54279		54279			1539600		TRUE	FALSE	FALSE	TRUE	TRUE	FALSE	S2_6027		S2_6027		309098
TGRH88_080960	KAF4642281.1	KAF4642281.1 | transcript=TGRH88_080960_t1 | gene=TGRH88_080960 | organism=Toxoplasma_gondii_RH-88 | gene_product=asparaginyl-tRNA synthetase (NOB+tRNA synthase) | transcript_product=asparaginyl-tRNA synthetase (NOB+tRNA synthase) | location=CM023089:10338	1	3	5.5	74.918	676	0	43.454	0//0	1//0	0//0	2045600	42	6			-1	48706		48706			1985000		TRUE	FALSE	FALSE	TRUE	TRUE	FALSE	S2_6027		S2_6027		388301
TGRH88_000540	KAF4645567.1	KAF4645567.1 | transcript=TGRH88_000540_t1 | gene=TGRH88_000540 | organism=Toxoplasma_gondii_RH-88 | gene_product=unspecified product | transcript_product=unspecified product | location=CM023083:530433-539741(+) | protein_length=604 | sequence_SO=chromosom	1	2	4.6	67.179	604	0	13.102	0//0	1//0	0//0	1609600	34	3			-1	47341		47341			1585700		TRUE	FALSE	FALSE	TRUE	TRUE	FALSE	S2_6027		S2_6027		305533
TGRH88_015680	KAF4644574.1	KAF4644574.1 | transcript=TGRH88_015680_t1 | gene=TGRH88_015680 | organism=Toxoplasma_gondii_RH-88 | gene_product=Sec23/Sec24 trunk domain-containing protein | transcript_product=Sec23/Sec24 trunk domain-containing protein | location=CM023090:4389920-44040	1	2	4.6	87.595	791	0	11.456	0//0	1//0	0//0	1189800	32	2			-1	37180		37180			1152600		TRUE	FALSE	FALSE	TRUE	TRUE	FALSE	S2_6027		S2_6027		225837
TGRH88_055700	KAF4639798.1	KAF4639798.1 | transcript=TGRH88_055700_t1 | gene=TGRH88_055700 | organism=Toxoplasma_gondii_RH-88 | gene_product=guanine nucleotide-binding protein | transcript_product=guanine nucleotide-binding protein | location=CM023092:5875943-5879535(-) | protein_le	1	3	14.6	35.147	321	0	23.631	0//0	1//0	0//0	424310	19	4			-1	22332		22332			403250		TRUE	FALSE	FALSE	TRUE	TRUE	FALSE	S2_6027		S2_6027		80542.1
TGRH88_033760	KAF4642650.1	KAF4642650.1 | transcript=TGRH88_033760_t1 | gene=TGRH88_033760 | organism=Toxoplasma_gondii_RH-88 | gene_product=unspecified product | transcript_product=unspecified product | location=CM023088:1261397-1274020(-) | protein_length=1306 | sequence_SO=chromo	1	2	2.7	140.82	1306	0	11.443	0//0	1//0	0//0	451970	44	2			-1	10272		10272			451970		TRUE	FALSE	FALSE	TRUE	TRUE	FALSE	S2_6027		S2_6027		85792.5
[truncated: 3 more columns]
