# Supplementary material for: Differential Affinity Chromatography Coupled to Mass Spectrometry: A Suitable Tool to Identify Common Binding Proteins of a Broad-Range Antimicrobial Peptide Derived from Leucinostatin
Source: Biomedicines. 2022 Oct 23;10(11):2675. doi: 10.3390/biomedicines10112675 (PMC9687860; doi:10.3390/biomedicines10112675)
Supplement: Supplementary file 1 [file biomedicines-10-02675-s001.zip › TableS2.xlsx]

## Sheet: Table S2
Leading_Protein	GN	Protein IDs	Majority protein IDs	Fasta headers	Number of proteins	Razor + unique peptides	Sequence coverage [%]	Mol. weight [kDa]	Sequence length	Q-value	Score	Num Ident byMSMS//byMatch SPL_M	Num Ident byMSMS//byMatch SPL_6027	Num Ident byMSMS//byMatch SPL_21358	Intensity	iBAQ peptides	MS/MS count	Only identified by site	Potential contaminant	Taxonomy IDs	iBAQ	iBAQ SPL_M	iBAQ SPL_6027	iBAQ SPL_21358	LFQ SPL_M	LFQ SPL_6027	LFQ SPL_21358	OnOff SPL_M vs SPL_6027 onIn	OnOff SPL_M vs SPL_21358 onIn	OnOff SPL_6027 vs SPL_21358 onIn	Top3 SPL_M	Top3 SPL_6027	Top3 SPL_21358	LFQ log2FC SPL_6027 - SPL_M	LFQ Prob quantile log2FC SPL_6027 - SPL_M	LFQ log2FC SPL_21358 - SPL_M	LFQ Prob quantile log2FC SPL_21358 - SPL_M	LFQ log2FC SPL_21358 - SPL_6027	LFQ Prob quantile log2FC SPL_21358 - SPL_6027	Top3 log2FC SPL_6027 - SPL_M	Top3 Prob quantile log2FC SPL_6027 - SPL_M	Top3 log2FC SPL_21358 - SPL_M	Top3 Prob quantile log2FC SPL_21358 - SPL_M	Top3 log2FC SPL_21358 - SPL_6027	Top3 Prob quantile log2FC SPL_21358 - SPL_6027	rAbu SPL_M	rAbu SPL_6027	rAbu SPL_21358
sp|A0A0B4J1G0|FCGR4_MOUSE	Fcgr4	sp|A0A0B4J1G0|FCGR4_MOUSE	sp|A0A0B4J1G0|FCGR4_MOUSE	Low affinity immunoglobulin gamma Fc region receptor IV OS=Mus musculus OX=10090 GN=Fcgr4 PE=1 SV=1	1	9	56.2	28.398	249	0	121.11	0//0	1//0	0//0	364750000	13	22			-1	28058000		28058000			474370000		SPL_6027		SPL_6027		1.75836e+08														0	450.135	0
sp|A2A6Q5|CDC27_MOUSE	Cdc27	sp|A2A6Q5|CDC27_MOUSE;sp|A2A6Q5-2|CDC27_MOUSE;sp|A2A6Q5-3|CDC27_MOUSE	sp|A2A6Q5|CDC27_MOUSE;sp|A2A6Q5-2|CDC27_MOUSE;sp|A2A6Q5-3|CDC27_MOUSE	Cell division cycle protein 27 homolog OS=Mus musculus OX=10090 GN=Cdc27 PE=1 SV=1;Isoform 2 of Cell division cycle protein 27 homolog OS=Mus musculus OX=10090 GN=Cdc27;Isoform 3 of Cell division cycle protein 27 homolog OS=Mus musculus OX=10090 GN=Cdc27	3	2	3.8	91.841	825	0	21.152	0//0	1//0	0//0	0	39	2			-1;-1;-1	0							SPL_6027		SPL_6027		0														0	0	0
sp|A2AF47|DOC11_MOUSE	Dock11	sp|A2AF47|DOC11_MOUSE	sp|A2AF47|DOC11_MOUSE	Dedicator of cytokinesis protein 11 OS=Mus musculus OX=10090 GN=Dock11 PE=1 SV=1	1	8	5.1	237.77	2073	0	62.787	1//0	1//0	1//0	246630000	116	22			-1	2126100	355550	138100	1632500	190860000	19307000	164380000				7.83281e+07	1.24511e+07	9.27138e+07	-3.30532	0.0251889168765743	-0.21548	0.369472182596291	3.08984	0.984971098265896	-2.65326	0.087962962962963	0.243253	0.494163424124514	2.89651	0.954314720812183	11.841	2.21554	14.0235
sp|A2AN08-3|UBR4_MOUSE	Ubr4	sp|A2AN08-3|UBR4_MOUSE;sp|A2AN08|UBR4_MOUSE;sp|A2AN08-5|UBR4_MOUSE;sp|A2AN08-2|UBR4_MOUSE	sp|A2AN08-3|UBR4_MOUSE;sp|A2AN08|UBR4_MOUSE;sp|A2AN08-5|UBR4_MOUSE;sp|A2AN08-2|UBR4_MOUSE	Isoform 3 of E3 ubiquitin-protein ligase UBR4 OS=Mus musculus OX=10090 GN=Ubr4;E3 ubiquitin-protein ligase UBR4 OS=Mus musculus OX=10090 GN=Ubr4 PE=1 SV=1;Isoform 5 of E3 ubiquitin-protein ligase UBR4 OS=Mus musculus OX=10090 GN=Ubr4;Isoform 2 of E3 ubiqui	4	8	3	570.29	5156	0	53.438	0//0	1//0	0//0	36352000	230	10			-1;-1;-1;-1	158050		158050			47967000		SPL_6027		SPL_6027		2.41913e+07														0	2.5356	0
sp|A2APV2-2|FMNL2_MOUSE	Fmnl2	sp|A2APV2-2|FMNL2_MOUSE;sp|A2APV2|FMNL2_MOUSE;sp|A2APV2-3|FMNL2_MOUSE	sp|A2APV2-2|FMNL2_MOUSE;sp|A2APV2|FMNL2_MOUSE;sp|A2APV2-3|FMNL2_MOUSE	Isoform 2 of Formin-like protein 2 OS=Mus musculus OX=10090 GN=Fmnl2;Formin-like protein 2 OS=Mus musculus OX=10090 GN=Fmnl2 PE=1 SV=2;Isoform 3 of Formin-like protein 2 OS=Mus musculus OX=10090 GN=Fmnl2	3	4	7.4	117.71	1032	0	23.542	1//0	1//0	0//0	5353400	52	6			-1;-1;-1	102950	65094	37856		14805000				SPL_M	SPL_6027	8.89541e+06	1.52994e+06								-2.53958	0.100694444444444					2.16785	0.607324	0
sp|A2AQ07|TBB1_MOUSE	Tubb1	sp|A2AQ07|TBB1_MOUSE	sp|A2AQ07|TBB1_MOUSE	Tubulin beta-1 chain OS=Mus musculus OX=10090 GN=Tubb1 PE=1 SV=1	1	19	70.7	50.44	451	0	323.31	1//0	1//0	1//0	799400000	20	64			-1	39970000	840320	33434000	5695300	78005000	834460000	112700000				4.41668e+07	2.10621e+08	5.57684e+07	3.4192	0.899244332493703	0.530849	0.634807417974322	-2.88836	0.134104046242775	2.25361	0.798611111111111	0.336483	0.540856031128405	-1.91713	0.239593908629442	27.9855	536.382	48.9238
sp|A2BH40-4|ARI1A_MOUSE	Arid1a	sp|A2BH40-4|ARI1A_MOUSE;sp|A2BH40-2|ARI1A_MOUSE;sp|A2BH40-3|ARI1A_MOUSE;sp|A2BH40|ARI1A_MOUSE	sp|A2BH40-4|ARI1A_MOUSE;sp|A2BH40-2|ARI1A_MOUSE;sp|A2BH40-3|ARI1A_MOUSE;sp|A2BH40|ARI1A_MOUSE	Isoform 4 of AT-rich interactive domain-containing protein 1A OS=Mus musculus OX=10090 GN=Arid1a;Isoform 2 of AT-rich interactive domain-containing protein 1A OS=Mus musculus OX=10090 GN=Arid1a;Isoform 3 of AT-rich interactive domain-containing protein 1A	4	4	3.9	206.4	1902	0	26.266	1//0	1//0	1//0	73321000	61	13			-1;-1;-1;-1	1202000	219100	570020	412860	52128000	36538000	38716000				3.51227e+07	2.70245e+07	1.23301e+07	-0.512661	0.326196473551637	-0.429129	0.312410841654779	0.0835322	0.603468208092486	-0.378134	0.354166666666667	-1.51022	0.171206225680934	-1.13208	0.376649746192893	7.29676	9.14484	3.54655
sp|A6H5Z3-2|EXC6B_MOUSE	Exoc6b	sp|A6H5Z3-2|EXC6B_MOUSE;sp|A6H5Z3|EXC6B_MOUSE	sp|A6H5Z3-2|EXC6B_MOUSE;sp|A6H5Z3|EXC6B_MOUSE	Isoform 2 of Exocyst complex component 6B OS=Mus musculus OX=10090 GN=Exoc6b;Exocyst complex component 6B OS=Mus musculus OX=10090 GN=Exoc6b PE=1 SV=1	2	2	5.5	78.802	678	0.0021243	10.879	0//0	1//0	0//0	3309200	38	2			-1;-1	87083		87083			3830800		SPL_6027		SPL_6027		2.57194e+06														0	1.39707	0
sp|B1AVZ0|UPP_MOUSE	Uprt	sp|B1AVZ0|UPP_MOUSE	sp|B1AVZ0|UPP_MOUSE	Uracil phosphoribosyltransferase homolog OS=Mus musculus OX=10090 GN=Uprt PE=1 SV=1	1	7	32.3	34.278	310	0	99.481	1//0	1//0	1//0	126940000	17	20			-1	7466900	310510	5414400	1741900	19240000	128150000	21355000				1.38723e+07	4.64671e+07	1.44985e+07	2.73565	0.855163727959698	0.150465	0.476462196861626	-2.58519	0.154913294797688	1.744	0.725694444444444	0.0636908	0.440985732814527	-1.68031	0.281218274111675	10.341	86.8633	14.9633
sp|B1AXP6|TOM5_MOUSE	Tomm5	sp|B1AXP6|TOM5_MOUSE;sp|B1AXP6-2|TOM5_MOUSE;sp|B1AXP6-3|TOM5_MOUSE;sp|B1AXP6-4|TOM5_MOUSE	sp|B1AXP6|TOM5_MOUSE;sp|B1AXP6-2|TOM5_MOUSE;sp|B1AXP6-3|TOM5_MOUSE;sp|B1AXP6-4|TOM5_MOUSE	Mitochondrial import receptor subunit TOM5 homolog OS=Mus musculus OX=10090 GN=Tomm5 PE=3 SV=1;Isoform 2 of Mitochondrial import receptor subunit TOM5 homolog OS=Mus musculus OX=10090 GN=Tomm5;Isoform 3 of Mitochondrial import receptor subunit TOM5 homolog	4	6	70.6	6.0372	51	0	59.884	0//0	1//0	1//0	222250000	5	22			-1;-1;-1;-1	44450000		27704000	16746000		182070000	68839000	SPL_6027	SPL_21358			8.43794e+07	4.09924e+07					-1.4032	0.299421965317919					-1.04153	0.397969543147208	0	444.456	143.852
sp|B1AY13|UBP24_MOUSE	Usp24	sp|B1AY13|UBP24_MOUSE;sp|B1AY13-2|UBP24_MOUSE	sp|B1AY13|UBP24_MOUSE	Ubiquitin carboxyl-terminal hydrolase 24 OS=Mus musculus OX=10090 GN=Usp24 PE=1 SV=1	2	25	12.3	294	2617	0	210.16	1//0	1//0	0//0	262460000	131	57			-1;-1	2003500	438130	1565400		302680000	228690000			SPL_M	SPL_6027	7.87018e+07	4.74897e+07		-0.4044	0.353904282115869					-0.728783	0.290509259259259					14.5912	25.1137	0
sp|B2RQC6-2|PYR1_MOUSE	Cad	sp|B2RQC6-2|PYR1_MOUSE;sp|B2RQC6|PYR1_MOUSE	sp|B2RQC6-2|PYR1_MOUSE;sp|B2RQC6|PYR1_MOUSE	Isoform 2 of CAD protein OS=Mus musculus OX=10090 GN=Cad;CAD protein OS=Mus musculus OX=10090 GN=Cad PE=1 SV=1	2	8	6.3	235.85	2154	0	67.061	1//0	1//0	0//0	83395000	94	13			-1;-1	887180	60175	827010		16915000	101400000			SPL_M	SPL_6027	1.48649e+07	4.39749e+07		2.58368	0.840050377833753					1.56477	0.700231481481482					2.00403	13.2677	0
sp|B2RUP2-2|UN13D_MOUSE	Unc13d	sp|B2RUP2-2|UN13D_MOUSE;sp|B2RUP2|UN13D_MOUSE	sp|B2RUP2-2|UN13D_MOUSE;sp|B2RUP2|UN13D_MOUSE	Isoform 2 of Protein unc-13 homolog D OS=Mus musculus OX=10090 GN=Unc13d;Protein unc-13 homolog D OS=Mus musculus OX=10090 GN=Unc13d PE=1 SV=2	2	7	9.8	122.89	1083	0	96.43	0//0	1//0	1//0	86738000	51	20			-1;-1	1700800		1492500	208230		96427000	10263000	SPL_6027	SPL_21358			5.27927e+07	5.1995e+06					-3.23198	0.116763005780347					-3.34389	0.0954314720812183	0	23.9442	1.78874
sp|B2RXR6|ANR44_MOUSE	Ankrd44	sp|B2RXR6|ANR44_MOUSE	sp|B2RXR6|ANR44_MOUSE	Serine/threonine-protein phosphatase 6 regulatory ankyrin repeat subunit B OS=Mus musculus OX=10090 GN=Ankrd44 PE=1 SV=1	1	17	24.4	107.38	993	0	178.66	0//0	1//0	1//0	233910000	49	35			-1	4773600		4716200	57405		306210000		SPL_6027	SPL_21358			6.14972e+07	1.37713e+06											-5.48078	0.016243654822335	0	75.6621	0.493121
sp|B2RY04|DOCK5_MOUSE	Dock5	sp|B2RY04|DOCK5_MOUSE	sp|B2RY04|DOCK5_MOUSE	Dedicator of cytokinesis protein 5 OS=Mus musculus OX=10090 GN=Dock5 PE=1 SV=2	1	9	8.4	214.43	1868	0	71.888	0//0	1//0	1//0	49086000	90	13			-1	545390		311140	234260		33487000		SPL_6027	SPL_21358			1.45025e+07	1.03222e+07											-0.49055	0.517766497461929	0	4.99162	2.01234
sp|B9EJ86|OSBL8_MOUSE	Osbpl8	sp|B9EJ86|OSBL8_MOUSE	sp|B9EJ86|OSBL8_MOUSE	Oxysterol-binding protein-related protein 8 OS=Mus musculus OX=10090 GN=Osbpl8 PE=1 SV=1	1	3	3.4	101.27	889	0	18.845	0//0	1//0	0//0	19420000	52	5			-1	373470		373470			24415000		SPL_6027		SPL_6027		1.50939e+07														0	5.99159	0
sp|D3Z4S3|PTRD1_MOUSE	Ptrhd1	sp|D3Z4S3|PTRD1_MOUSE	sp|D3Z4S3|PTRD1_MOUSE	Putative peptidyl-tRNA hydrolase PTRHD1 OS=Mus musculus OX=10090 GN=Ptrhd1 PE=1 SV=1	1	6	46.4	16.037	140	0	74.6	1//0	1//0	1//0	217640000	8	23			-1	27205000	23184000	4020600		859170000	39405000					3.81042e+08	2.49989e+07	0	-4.44649	0.0125944584382872					-3.93001	0.0219907407407407					772.105	64.5026	0
sp|D3Z6Q9|BIN2_MOUSE	Bin2	sp|D3Z6Q9|BIN2_MOUSE	sp|D3Z6Q9|BIN2_MOUSE	Bridging integrator 2 OS=Mus musculus OX=10090 GN=Bin2 PE=1 SV=1	1	3	8.2	52.553	489	0	31.705	1//0	0//0	1//0	25778000	22	8			-1	1171700	295160		876570	27289000		19640000	SPL_M		SPL_21358	1.70653e+07		9.44165e+06			-0.474525	0.300998573466476					-0.853952	0.252918287937743			9.82982	0	7.52992
sp|E9PV24-2|FIBA_MOUSE	Fga	sp|E9PV24-2|FIBA_MOUSE;sp|E9PV24|FIBA_MOUSE	sp|E9PV24-2|FIBA_MOUSE;sp|E9PV24|FIBA_MOUSE	Isoform 2 of Fibrinogen alpha chain OS=Mus musculus OX=10090 GN=Fga;Fibrinogen alpha chain OS=Mus musculus OX=10090 GN=Fga PE=1 SV=1	2	3	6.5	61.325	557	0	21.167	0//0	1//0	1//0	2143800	24	2			-1;-1	89324		40085	49239			933150	SPL_6027	SPL_21358			747702	578555											-0.370009	0.545177664974619	0	0.643084	0.422973
sp|E9PVA8|GCN1_MOUSE	Gcn1	sp|E9PVA8|GCN1_MOUSE	sp|E9PVA8|GCN1_MOUSE	eIF-2-alpha kinase activator GCN1 OS=Mus musculus OX=10090 GN=Gcn1 PE=1 SV=1	1	42	20.6	293.02	2671	0	323.31	0//0	1//0	0//0	479520000	163	86			-1	2941800		2941800			608100000		SPL_6027		SPL_6027		5.90277e+07														0	47.1953	0
sp|E9PVX6-2|KI67_MOUSE	Mki67	sp|E9PVX6-2|KI67_MOUSE;sp|E9PVX6|KI67_MOUSE	sp|E9PVX6-2|KI67_MOUSE;sp|E9PVX6|KI67_MOUSE	Isoform 2 of Proliferation marker protein Ki-67 OS=Mus musculus OX=10090 GN=Mki67;Proliferation marker protein Ki-67 OS=Mus musculus OX=10090 GN=Mki67 PE=1 SV=1	2	2	1	324.71	2936	0.00061312	17.624	0//0	0//0	1//0	9661000	143	3			-1;-1	67559			67559			7758000		SPL_21358	SPL_21358			4.72998e+06													0	0	0.580346
sp|E9Q2M9|WDFY4_MOUSE	Wdfy4	sp|E9Q2M9|WDFY4_MOUSE	sp|E9Q2M9|WDFY4_MOUSE	WD repeat- and FYVE domain-containing protein 4 OS=Mus musculus OX=10090 GN=Wdfy4 PE=1 SV=2	1	41	21.7	354.33	3183	0	323.31	0//0	1//0	1//0	821610000	136	90			-1	6041200		5644400	396820		971260000	55775000	SPL_6027	SPL_21358			1.51245e+08	2.64228e+07					-4.12217	0.0670520231213873					-2.51703	0.173604060913706	0	90.5532	3.40877
sp|E9Q3L2|PI4KA_MOUSE	Pi4ka	sp|E9Q3L2|PI4KA_MOUSE	sp|E9Q3L2|PI4KA_MOUSE	Phosphatidylinositol 4-kinase alpha OS=Mus musculus OX=10090 GN=Pi4ka PE=1 SV=2	1	7	3.7	237.04	2105	0	47.922	0//0	1//0	1//0	45688000	116	12			-1	393870		218580	175280		34801000	13226000	SPL_6027	SPL_21358			1.59457e+07	9.95475e+06					-1.39575	0.301734104046243					-0.679709	0.472081218274112	0	3.50668	1.50569
sp|E9Q414|APOB_MOUSE	Apob	sp|E9Q414|APOB_MOUSE	sp|E9Q414|APOB_MOUSE	Apolipoprotein B-100 OS=Mus musculus OX=10090 GN=Apob PE=1 SV=1	1	5	1.4	509.43	4505	0	31.821	0//0	1//0	0//0	25052000	223	7			-1	112340		112340			32736000		SPL_6027		SPL_6027		1.43819e+07														0	1.80227	0
sp|E9Q4N7|ARI1B_MOUSE	Arid1b	sp|E9Q4N7|ARI1B_MOUSE	sp|E9Q4N7|ARI1B_MOUSE	AT-rich interactive domain-containing protein 1B OS=Mus musculus OX=10090 GN=Arid1b PE=1 SV=1	1	2	1.2	237.79	2244	0.0031332	10.23	1//0	1//0	0//0	4529500	64	2			-1	70774		70774			6818100			SPL_M	SPL_6027	0	3.52038e+06														0	1.13543	0
sp|E9Q5C9-2|NOLC1_MOUSE	Nolc1	sp|E9Q5C9-2|NOLC1_MOUSE;sp|E9Q5C9|NOLC1_MOUSE	sp|E9Q5C9-2|NOLC1_MOUSE;sp|E9Q5C9|NOLC1_MOUSE	Isoform 2 of Nucleolar and coiled-body phosphoprotein 1 OS=Mus musculus OX=10090 GN=Nolc1;Nucleolar and coiled-body phosphoprotein 1 OS=Mus musculus OX=10090 GN=Nolc1 PE=1 SV=1	2	2	3.9	69.272	664	0.0011635	14.42	0//0	1//0	1//0	45882000	35	3			-1;-1	1310900		1293100	17787		59969000		SPL_6027	SPL_21358			3.51759e+07	304803											-6.85057	0.00304568527918782	0	20.7452	0.152794
sp|E9Q634|MYO1E_MOUSE	Myo1e	sp|E9Q634|MYO1E_MOUSE	sp|E9Q634|MYO1E_MOUSE	Unconventional myosin-Ie OS=Mus musculus OX=10090 GN=Myo1e PE=1 SV=1	1	2	3.1	126.82	1107	0.0011448	13.811	0//0	1//0	0//0	28939000	58	5			-1	498940		498940			38044000		SPL_6027		SPL_6027		2.24914e+07														0	8.0045	0
sp|E9Q6P5|TTC7B_MOUSE	Ttc7b	sp|E9Q6P5|TTC7B_MOUSE	sp|E9Q6P5|TTC7B_MOUSE	Tetratricopeptide repeat protein 7B OS=Mus musculus OX=10090 GN=Ttc7b PE=1 SV=1	1	6	9	94.202	843	0	45.397	0//0	1//0	1//0	80765000	42	6			-1	1923000		728700	1194300		36391000		SPL_6027	SPL_21358			1.63456e+07	2.45581e+07											0.587301	0.732994923857868	0	11.6905	10.2593
sp|E9Q7X7|NRX2A_MOUSE	Nrxn2	sp|E9Q7X7|NRX2A_MOUSE	sp|E9Q7X7|NRX2A_MOUSE	Neurexin-2 OS=Mus musculus OX=10090 GN=Nrxn2 PE=1 SV=1	1	2	1.7	184.88	1710	0.0036477	10.155	0//0	1//0	0//0	119770000	80	2			-1	1497100		1497100			156520000		SPL_6027		SPL_6027		9.30869e+07														0	24.018	0
sp|E9QAT4|SC16A_MOUSE	Sec16a	sp|E9QAT4|SC16A_MOUSE;sp|E9QAT4-2|SC16A_MOUSE	sp|E9QAT4|SC16A_MOUSE;sp|E9QAT4-2|SC16A_MOUSE	Protein transport protein Sec16A OS=Mus musculus OX=10090 GN=Sec16a PE=1 SV=1;Isoform 2 of Protein transport protein Sec16A OS=Mus musculus OX=10090 GN=Sec16a	2	5	3.5	254.2	2357	0	27.899	0//0	1//0	0//0	26689000	83	6			-1;-1	321560		321560			32437000		SPL_6027		SPL_6027		1.87705e+07														0	5.15879	0
sp|G3X987|GIMA9_MOUSE	Gimap9	sp|G3X987|GIMA9_MOUSE	sp|G3X987|GIMA9_MOUSE	GTPase IMAP family member 9 OS=Mus musculus OX=10090 GN=Gimap9 PE=1 SV=1	1	2	7.6	33.298	291	0.0011223	12.971	0//0	1//0	0//0	7332600	18	2			-1	407360		407360			9692500		SPL_6027		SPL_6027		5.69891e+06														0	6.53528	0
sp|G5E829|AT2B1_MOUSE	Atp2b1	sp|G5E829|AT2B1_MOUSE;sp|Q9R0K7|AT2B2_MOUSE;sp|Q6Q477-2|AT2B4_MOUSE;sp|Q6Q477|AT2B4_MOUSE	sp|G5E829|AT2B1_MOUSE;sp|Q9R0K7|AT2B2_MOUSE	Plasma membrane calcium-transporting ATPase 1 OS=Mus musculus OX=10090 GN=Atp2b1 PE=1 SV=1;Plasma membrane calcium-transporting ATPase 2 OS=Mus musculus OX=10090 GN=Atp2b2 PE=1 SV=2	4	3	3.2	134.75	1220	0	23.61	0//0	1//0	0//0	19032000	50	6			-1;-1;-1;-1	380640		380640			22744000		SPL_6027		SPL_6027		1.4792e+07														0	6.10661	0
sp|G5E870|TRIPC_MOUSE	Trip12	sp|G5E870|TRIPC_MOUSE	sp|G5E870|TRIPC_MOUSE	E3 ubiquitin-protein ligase TRIP12 OS=Mus musculus OX=10090 GN=Trip12 PE=1 SV=1	1	5	3.7	224.13	2025	0	49.606	1//0	1//0	1//0	58487000	98	17			-1	596800	79199	409160	108440	30515000	53499000	13313000				2.03974e+07	2.84004e+07	5.20298e+06	0.809993	0.617128463476071	-1.19668	0.159771754636234	-2.00668	0.215028901734104	0.477524	0.489583333333333	-1.97097	0.114137483787289	-2.4485	0.180710659898477	2.63759	6.56416	0.931522
sp|O08547|SC22B_MOUSE	Sec22b	sp|O08547|SC22B_MOUSE	sp|O08547|SC22B_MOUSE	Vesicle-trafficking protein SEC22b OS=Mus musculus OX=10090 GN=Sec22b PE=1 SV=3	1	14	70.7	24.74	215	0	261.5	0//0	1//0	0//0	887420000	12	44			-1	73952000		73952000			1173500000		SPL_6027		SPL_6027		3.4243e+08														0	1186.41	0
sp|O08553|DPYL2_MOUSE	Dpysl2	sp|O08553|DPYL2_MOUSE	sp|O08553|DPYL2_MOUSE	Dihydropyrimidinase-related protein 2 OS=Mus musculus OX=10090 GN=Dpysl2 PE=1 SV=2	1	25	63.5	62.277	572	0	323.31	1//0	1//0	1//0	2387700000	30	146			-1	79588000	21542000	11824000	46222000	2641300000	536310000	1480400000				5.87682e+08	1.4509e+08	3.60574e+08	-2.30011	0.0717884130982368	-0.835261	0.223965763195435	1.46485	0.890173410404624	-2.01808	0.148148148148148	-0.70474	0.280155642023346	1.31334	0.838578680203046	717.421	189.693	397.057
sp|O08573-3|LEG9_MOUSE	Lgals9	sp|O08573-3|LEG9_MOUSE;sp|O08573-2|LEG9_MOUSE;sp|O08573|LEG9_MOUSE	sp|O08573-3|LEG9_MOUSE;sp|O08573-2|LEG9_MOUSE;sp|O08573|LEG9_MOUSE	Isoform 3 of Galectin-9 OS=Mus musculus OX=10090 GN=Lgals9;Isoform 2 of Galectin-9 OS=Mus musculus OX=10090 GN=Lgals9;Galectin-9 OS=Mus musculus OX=10090 GN=Lgals9 PE=1 SV=1	3	9	40.3	35.164	310	0	148.66	1//0	1//0	1//0	423570000	14	35			-1;-1;-1	30255000	1415400	12300000	16540000	93836000	191600000	224960000				5.20754e+07	8.54577e+07	9.53805e+07	1.02988	0.653652392947103	1.26146	0.830242510699001	0.231571	0.642774566473988	0.714609	0.540509259259259	0.873093	0.670557717250324	0.158484	0.658883248730964	47.1376	197.329	142.082
sp|O08579|EMD_MOUSE	Emd	sp|O08579|EMD_MOUSE	sp|O08579|EMD_MOUSE	Emerin OS=Mus musculus OX=10090 GN=Emd PE=1 SV=1	1	4	37.8	29.435	259	0	44.681	0//0	1//0	0//0	66320000	11	10			-1	6029100		6029100			82118000		SPL_6027		SPL_6027		4.93074e+07														0	96.725	0
sp|O08583|THOC4_MOUSE	Alyref	sp|O08583|THOC4_MOUSE;sp|O08583-2|THOC4_MOUSE;sp|Q9JJW6-2|ALRF2_MOUSE;sp|Q9JJW6|ALRF2_MOUSE	sp|O08583|THOC4_MOUSE;sp|O08583-2|THOC4_MOUSE;sp|Q9JJW6-2|ALRF2_MOUSE	THO complex subunit 4 OS=Mus musculus OX=10090 GN=Alyref PE=1 SV=3;Isoform 2 of THO complex subunit 4 OS=Mus musculus OX=10090 GN=Alyref;Isoform 2 of Aly/REF export factor 2 OS=Mus musculus OX=10090 GN=Alyref2	4	5	36.5	26.94	255	0	43.969	1//0	1//0	1//0	134250000	14	19			-1;-1;-1;-1	9589500	3586600	1419400	4583400	239280000	31671000	41380000				1.08327e+08	1.54449e+07	3.14159e+07	-2.91747	0.0377833753148615	-2.53169	0.0456490727532097	0.385771	0.676300578034682	-2.81019	0.068287037037037	-1.78583	0.14526588845655	1.02436	0.802030456852792	119.446	22.7715	39.3724
sp|O08585|CLCA_MOUSE	Clta	sp|O08585|CLCA_MOUSE	sp|O08585|CLCA_MOUSE	Clathrin light chain A OS=Mus musculus OX=10090 GN=Clta PE=1 SV=2	1	6	23.4	25.604	235	0	75.572	0//0	1//0	1//0	484070000	7	24			-1	69153000		61498000	7655000		540870000	59746000	SPL_6027	SPL_21358			2.63285e+08	2.6235e+07					-3.17837	0.120231213872832					-3.32706	0.0974619289340102	0	986.613	65.758
sp|O08638|MYH11_MOUSE	Myh11	sp|O08638|MYH11_MOUSE;sp|O08638-2|MYH11_MOUSE	sp|O08638|MYH11_MOUSE;sp|O08638-2|MYH11_MOUSE	Myosin-11 OS=Mus musculus OX=10090 GN=Myh11 PE=1 SV=1;Isoform 2 of Myosin-11 OS=Mus musculus OX=10090 GN=Myh11	2	43	31	227.03	1972	0	323.31	0//1	1//0	1//0	876340000	97	112			-1;-1	9034400		8664500	369890		1055700000	35365000	SPL_6027	SPL_21358			1.13996e+08	1.75663e+07					-4.89973	0.0369942196531792					-2.6981	0.154314720812183	0	139.005	3.17743
sp|O08709|PRDX6_MOUSE	Prdx6	sp|O08709|PRDX6_MOUSE	sp|O08709|PRDX6_MOUSE	Peroxiredoxin-6 OS=Mus musculus OX=10090 GN=Prdx6 PE=1 SV=3	1	15	73.2	24.87	224	0	226.62	1//0	1//0	1//0	826190000	14	90			-1	59013000	7871900	7206400	43935000	464270000	146370000	539780000				1.14418e+08	3.61161e+07	1.42685e+08	-1.66534	0.13727959697733	0.217407	0.512125534950071	1.88275	0.929479768786127	-1.6636	0.173611111111111	0.318525	0.53177691309987	1.98212	0.89746192893401	262.161	115.612	377.411
sp|O08739|AMPD3_MOUSE	Ampd3	sp|O08739|AMPD3_MOUSE;sp|Q3V1D3|AMPD1_MOUSE	sp|O08739|AMPD3_MOUSE	AMP deaminase 3 OS=Mus musculus OX=10090 GN=Ampd3 PE=1 SV=2	2	12	20.4	88.651	766	0	122.45	1//0	1//0	1//0	358980000	31	39			-1;-1	11580000	1884900	1200200	8494800	216010000	65967000	262760000				7.16157e+07	1.72035e+07	1.17559e+08	-1.71128	0.129722921914358	0.282648	0.540656205420827	1.99393	0.95028901734104	-2.05757	0.142361111111111	0.715035	0.636835278858625	2.77261	0.946192893401015	62.7735	19.2548	72.9721
sp|O08756|HCD2_MOUSE	Hsd17b10	sp|O08756|HCD2_MOUSE	sp|O08756|HCD2_MOUSE	3-hydroxyacyl-CoA dehydrogenase type-2 OS=Mus musculus OX=10090 GN=Hsd17b10 PE=1 SV=4	1	3	20.7	27.418	261	0	39.689	1//0	1//0	1//0	127890000	14	12			-1	9134800	135280	116190	8883300	21204000	5907500	89717000				4.97722e+06	1.26429e+06	6.0889e+07	-1.84372	0.105793450881612	2.08104	0.92867332382311	3.92476	0.993063583815029	-1.97701	0.150462962962963	3.61277	0.974059662775616	5.58978	1	4.50528	1.86404	76.3094
sp|O08784|TCOF_MOUSE	Tcof1	sp|O08784|TCOF_MOUSE	sp|O08784|TCOF_MOUSE	Treacle protein OS=Mus musculus OX=10090 GN=Tcof1 PE=1 SV=1	1	2	1.6	135	1320	0	44.558	1//0	1//0	1//0	60869000	64	7			-1	951080	214490	411380	325220	56522000	36817000	22432000				3.60746e+07	2.04624e+07	1.01905e+07	-0.61844	0.304785894206549	-1.33325	0.145506419400856	-0.714814	0.421965317919075	-0.818011	0.27662037037037	-1.82375	0.137483787289235	-1.00574	0.407106598984772	7.14324	6.59978	2.79371
sp|O08788-2|DCTN1_MOUSE	Dctn1	sp|O08788-2|DCTN1_MOUSE;sp|O08788|DCTN1_MOUSE	sp|O08788-2|DCTN1_MOUSE;sp|O08788|DCTN1_MOUSE	Isoform 2 of Dynactin subunit 1 OS=Mus musculus OX=10090 GN=Dctn1;Dynactin subunit 1 OS=Mus musculus OX=10090 GN=Dctn1 PE=1 SV=3	2	5	6.3	138.2	1243	0	34.628	1//0	1//0	1//0	32783000	59	7			-1;-1	555650	138170	40726	376750			18883000				2.14238e+07	1.86749e+06	1.08829e+07							-3.52004	0.037037037037037	-0.977145	0.237354085603113	2.5429	0.936040609137056	4.60152	0.653368	3.23636
sp|O08810|U5S1_MOUSE	Eftud2	sp|O08810|U5S1_MOUSE	sp|O08810|U5S1_MOUSE	116 kDa U5 small nuclear ribonucleoprotein component OS=Mus musculus OX=10090 GN=Eftud2 PE=1 SV=1	1	20	27.5	109.36	971	0	181.88	1//0	1//0	1//0	261480000	52	43			-1	5028400	64256	4877100	87050	14775000	332130000					8.78094e+06	6.82795e+07	2.2162e+06	4.49052	0.947103274559194					2.95901	0.878472222222222	-1.98629	0.11284046692607	-4.94529	0.0284263959390863	2.13994	78.2434	0.747777
sp|O08912|GALT1_MOUSE	Galnt1	sp|O08912|GALT1_MOUSE	sp|O08912|GALT1_MOUSE	Polypeptide N-acetylgalactosaminyltransferase 1 OS=Mus musculus OX=10090 GN=Galnt1 PE=1 SV=1	1	6	15.9	64.254	559	0	48.669	0//0	1//0	0//0	14235000	28	9			-1	508400		508400			19389000		SPL_6027		SPL_6027		1.10637e+07														0	8.15627	0
sp|O08914|FAAH1_MOUSE	Faah	sp|O08914|FAAH1_MOUSE	sp|O08914|FAAH1_MOUSE	Fatty-acid amide hydrolase 1 OS=Mus musculus OX=10090 GN=Faah PE=1 SV=1	1	3	6.6	63.221	579	0	21.178	0//0	1//0	0//0	16264000	21	4			-1	774480		774480			19983000		SPL_6027		SPL_6027		1.26407e+07														0	12.425	0
sp|O08915|AIP_MOUSE	Aip	sp|O08915|AIP_MOUSE	sp|O08915|AIP_MOUSE	AH receptor-interacting protein OS=Mus musculus OX=10090 GN=Aip PE=1 SV=1	1	8	24.8	37.605	330	0	191.16	1//0	1//0	1//0	427920000	15	36			-1	28528000	162980	18250000	10115000	38480000	314230000	130520000				6.42464e+06	1.40518e+08	7.42828e+07	3.02964	0.870277078085642	1.76209	0.898716119828816	-1.26755	0.32485549132948	4.45099	0.954861111111111	3.53134	0.970168612191958	-0.919652	0.425380710659898	5.42778	292.785	86.8899
sp|O08917|FLOT1_MOUSE	Flot1	sp|O08917|FLOT1_MOUSE	sp|O08917|FLOT1_MOUSE	Flotillin-1 OS=Mus musculus OX=10090 GN=Flot1 PE=1 SV=1	1	12	34.1	47.513	428	0	119.25	0//0	1//0	0//0	247360000	28	27			-1	8834100		8834100			319810000		SPL_6027		SPL_6027		7.73446e+07														0	141.726	0
sp|O08997|ATOX1_MOUSE	Atox1	sp|O08997|ATOX1_MOUSE	sp|O08997|ATOX1_MOUSE	Copper transport protein ATOX1 OS=Mus musculus OX=10090 GN=Atox1 PE=1 SV=1	1	6	88.2	7.3384	68	0	89.111	1//0	1//0	1//0	217130000	4	27			-1	54282000	7524500	43491000	3266600	114210000	223290000	38877000				7.90972e+07	8.75275e+07	6.39705e+06	0.96723	0.639798488664987	-1.5547	0.121255349500713	-2.52193	0.161849710982659	0.146109	0.452546296296296	-3.62815	0.0350194552529183	-3.77426	0.0680203045685279	250.591	697.727	28.0608
sp|O09005|DEGS1_MOUSE	Degs1	sp|O09005|DEGS1_MOUSE	sp|O09005|DEGS1_MOUSE	Sphingolipid delta(4)-desaturase DES1 OS=Mus musculus OX=10090 GN=Degs1 PE=1 SV=1	1	2	10.5	38.241	323	0.0006035	16.564	0//0	1//0	0//0	21508000	7	2			-1	3072600		3072600			27458000		SPL_6027		SPL_6027		1.67165e+07														0	49.2938	0
sp|O09061|PSB1_MOUSE	Psmb1	sp|O09061|PSB1_MOUSE	sp|O09061|PSB1_MOUSE	Proteasome subunit beta type-1 OS=Mus musculus OX=10090 GN=Psmb1 PE=1 SV=1	1	3	20	26.372	240	0	35.97	0//0	1//0	0//0	21528000	13	2			-1	1656000		1656000			26245000		SPL_6027		SPL_6027		1.67321e+07														0	26.5672	0
sp|O09106|HDAC1_MOUSE	Hdac1	sp|O09106|HDAC1_MOUSE	sp|O09106|HDAC1_MOUSE	Histone deacetylase 1 OS=Mus musculus OX=10090 GN=Hdac1 PE=1 SV=1	1	13	42.5	55.074	482	0	171.95	1//0	1//0	1//0	747030000	23	70			-1	32479000	8848100	8528500	15103000	699460000	295720000	504810000				3.33573e+08	1.06377e+08	1.17883e+08	-1.24201	0.181360201511335	-0.470501	0.303851640513552	0.771509	0.773410404624277	-1.64881	0.174768518518519	-1.50065	0.172503242542153	0.148167	0.654822335025381	294.671	136.823	129.738
sp|O09111|NDUBB_MOUSE	Ndufb11	sp|O09111|NDUBB_MOUSE	sp|O09111|NDUBB_MOUSE	NADH dehydrogenase [ubiquinone] 1 beta subcomplex subunit 11, mitochondrial OS=Mus musculus OX=10090 GN=Ndufb11 PE=1 SV=2	1	2	19.2	17.444	151	0.00060716	17.129	0//0	1//0	0//0	70477000	8	5			-1	8809600		8809600			89782000		SPL_6027		SPL_6027		5.47753e+07														0	141.333	0
sp|O09167|RL21_MOUSE	Rpl21	sp|O09167|RL21_MOUSE	sp|O09167|RL21_MOUSE	60S ribosomal protein L21 OS=Mus musculus OX=10090 GN=Rpl21 PE=1 SV=3	1	10	50.6	18.562	160	0	162.62	1//0	1//0	1//0	2163600000	7	65			-1	309080000	48533000	177630000	82916000	1756900000	1456400000	482400000				6.05147e+08	6.38476e+08	2.43318e+08	-0.270625	0.381612090680101	-1.86473	0.0855920114122682	-1.5941	0.270520231213873	0.0773478	0.436342592592593	-1.31444	0.195849546044099	-1.39179	0.330964467005076	1616.31	2849.72	712.266
sp|O09172|GSH0_MOUSE	Gclm	sp|O09172|GSH0_MOUSE	sp|O09172|GSH0_MOUSE	Glutamate--cysteine ligase regulatory subunit OS=Mus musculus OX=10090 GN=Gclm PE=1 SV=1	1	3	14.2	30.534	274	0	19.383	1//0	0//0	1//0	63739000	9	5			-1	7082100	1012500		6069600	43484000			SPL_M		SPL_21358	2.3947e+07		2.67449e+07									0.159419	0.46822308690013			33.7196	0	52.1391
sp|O35075|VP26C_MOUSE	Vps26c	sp|O35075|VP26C_MOUSE	sp|O35075|VP26C_MOUSE	Vacuolar protein sorting-associated protein 26C OS=Mus musculus OX=10090 GN=Vps26c PE=1 SV=1	1	10	46.8	32.97	297	0	218.79	1//0	1//0	1//0	414730000	15	45			-1	27649000	1710200	15458000	10481000	102710000	245060000	204990000				3.99814e+07	1.11275e+08	6.75487e+07	1.25456	0.683879093198992	0.996977	0.78601997146933	-0.257581	0.532947976878613	1.47673	0.674768518518518	0.756601	0.647211413748379	-0.720128	0.460913705583756	56.9554	247.993	90.034
sp|O35114|SCRB2_MOUSE	Scarb2	sp|O35114|SCRB2_MOUSE	sp|O35114|SCRB2_MOUSE	Lysosome membrane protein 2 OS=Mus musculus OX=10090 GN=Scarb2 PE=1 SV=3	1	2	10.5	54.043	478	0	22.162	0//0	1//0	0//0	16059000	21	2			-1	764730		764730			22455000		SPL_6027		SPL_6027		1.24816e+07														0	12.2686	0
sp|O35129|PHB2_MOUSE	Phb2	sp|O35129|PHB2_MOUSE	sp|O35129|PHB2_MOUSE	Prohibitin-2 OS=Mus musculus OX=10090 GN=Phb2 PE=1 SV=1	1	35	92.6	33.296	299	0	323.31	0//0	1//0	1//0	9574300000	22	180			-1	435200000		387870000	47332000		10900000000	1056100000	SPL_6027	SPL_21358			3.31015e+09	3.62988e+08					-3.36751	0.107514450867052					-3.1889	0.106598984771574	0	6222.61	406.592
sp|O35143|ATIF1_MOUSE	Atp5if1	sp|O35143|ATIF1_MOUSE	sp|O35143|ATIF1_MOUSE	ATPase inhibitor, mitochondrial OS=Mus musculus OX=10090 GN=Atp5if1 PE=1 SV=2	1	3	17	12.159	106	0	20.411	1//0	1//0	1//0	268040000	6	16			-1	44673000	1637300	24793000	18243000	92361000	181760000	57392000				2.58173e+07	1.15615e+08	5.35906e+07	0.976679	0.646095717884131	-0.686434	0.255349500713267	-1.66311	0.26242774566474	2.16292	0.791666666666667	1.05364	0.712062256809339	-1.10928	0.381725888324873	54.5276	397.755	156.711
sp|O35166|GOSR2_MOUSE	Gosr2	sp|O35166|GOSR2_MOUSE	sp|O35166|GOSR2_MOUSE	Golgi SNAP receptor complex member 2 OS=Mus musculus OX=10090 GN=Gosr2 PE=1 SV=2	1	7	42.9	24.725	212	0	92.182	0//0	1//0	0//0	182430000	7	26			-1	26062000		26062000			238580000		SPL_6027		SPL_6027		1.04027e+08														0	418.113	0
sp|O35207|CDKA1_MOUSE	Cdk2ap1	sp|O35207|CDKA1_MOUSE;sp|Q9CPY4|CDKA2_MOUSE	sp|O35207|CDKA1_MOUSE;sp|Q9CPY4|CDKA2_MOUSE	Cyclin-dependent kinase 2-associated protein 1 OS=Mus musculus OX=10090 GN=Cdk2ap1 PE=1 SV=2;Cyclin-dependent kinase 2-associated protein 2 OS=Mus musculus OX=10090 GN=Cdk2ap2 PE=1 SV=1	2	3	27.2	12.354	114	0	18.553	1//0	0//0	0//0	9778300	4	5			-1;-1	2444600	2444600			45816000			SPL_M	SPL_M		2.56974e+07															81.4134	0	0
sp|O35218|CPSF2_MOUSE	Cpsf2	sp|O35218|CPSF2_MOUSE	sp|O35218|CPSF2_MOUSE	Cleavage and polyadenylation specificity factor subunit 2 OS=Mus musculus OX=10090 GN=Cpsf2 PE=1 SV=1	1	10	18	88.382	782	0	86.677	0//0	1//0	0//0	133980000	41	16			-1	3267700		3267700			170720000		SPL_6027		SPL_6027		5.58553e+07														0	52.4238	0
sp|O35226-5|PSMD4_MOUSE	Psmd4	sp|O35226-5|PSMD4_MOUSE;sp|O35226-4|PSMD4_MOUSE;sp|O35226-3|PSMD4_MOUSE;sp|O35226|PSMD4_MOUSE;sp|O35226-2|PSMD4_MOUSE	sp|O35226-5|PSMD4_MOUSE;sp|O35226-4|PSMD4_MOUSE;sp|O35226-3|PSMD4_MOUSE;sp|O35226|PSMD4_MOUSE;sp|O35226-2|PSMD4_MOUSE	Isoform Rpn10E of 26S proteasome non-ATPase regulatory subunit 4 OS=Mus musculus OX=10090 GN=Psmd4;Isoform Rpn10D of 26S proteasome non-ATPase regulatory subunit 4 OS=Mus musculus OX=10090 GN=Psmd4;Isoform Rpn10C of 26S proteasome non-ATPase regulatory sub	5	7	39.6	27.912	260	0	192.52	1//0	1//0	1//0	225370000	12	21			-1;-1;-1;-1;-1	18781000	761800	11914000	6105000	75469000	138330000	75345000				2.40244e+07	9.11108e+07	3.58682e+07	0.874158	0.6272040302267	-0.00237238	0.436519258202568	-0.87653	0.391907514450867	1.92312	0.748842592592593	0.578204	0.605706874189364	-1.34492	0.338071065989848	25.3705	191.137	52.4432
sp|O35250-2|EXOC7_MOUSE	Exoc7	sp|O35250-2|EXOC7_MOUSE;sp|O35250|EXOC7_MOUSE	sp|O35250-2|EXOC7_MOUSE;sp|O35250|EXOC7_MOUSE	Isoform 2 of Exocyst complex component 7 OS=Mus musculus OX=10090 GN=Exoc7;Exocyst complex component 7 OS=Mus musculus OX=10090 GN=Exoc7 PE=1 SV=2	2	16	31.1	75.158	653	0	217.84	0//0	1//0	1//0	263580000	33	37			-1;-1	7987200		7987200			332150000		SPL_6027	SPL_21358			8.11481e+07	0													0	128.139	0
sp|O35286|DHX15_MOUSE	Dhx15	sp|O35286|DHX15_MOUSE	sp|O35286|DHX15_MOUSE	Pre-mRNA-splicing factor ATP-dependent RNA helicase DHX15 OS=Mus musculus OX=10090 GN=Dhx15 PE=1 SV=2	1	3	4.4	91.006	795	0	28.855	1//0	1//0	1//0	37365000	38	3			-1	983290		138590	844700		5266500					0	4.09319e+06	1.57149e+07											1.94083	0.890355329949239	0	2.2234	7.25615
sp|O35290|ECP3_MOUSE	Ear3	sp|O35290|ECP3_MOUSE;sp|P97426|ECP1_MOUSE	sp|O35290|ECP3_MOUSE	Eosinophil cationic-type ribonuclease 3 OS=Mus musculus OX=10090 GN=Ear3 PE=1 SV=1	2	3	17.3	17.744	156	0	19.076	1//0	1//0	1//0	53556000	10	8			-1;-1	5355600	2947000	2408600			30868000					7.7447e+07	1.872e+07	0							-2.04863	0.143518518518519					98.145	38.6412	0
sp|O35350|CAN1_MOUSE	Capn1	sp|O35350|CAN1_MOUSE	sp|O35350|CAN1_MOUSE	Calpain-1 catalytic subunit OS=Mus musculus OX=10090 GN=Capn1 PE=1 SV=1	1	11	17.4	82.105	713	0	122.67	1//0	1//0	1//0	213340000	41	26			-1	5203300	131600	2805600	2266100	54060000	125090000	73480000				1.41796e+07	4.49534e+07	4.54888e+07	1.21033	0.677581863979849	0.44279	0.601997146932953	-0.767543	0.410404624277457	1.66462	0.712962962962963	1.6817	0.826199740596628	0.0170806	0.624365482233503	4.38272	45.0103	19.4663
sp|O35382|EXOC4_MOUSE	Exoc4	sp|O35382|EXOC4_MOUSE	sp|O35382|EXOC4_MOUSE	Exocyst complex component 4 OS=Mus musculus OX=10090 GN=Exoc4 PE=1 SV=2	1	15	19.3	110.54	975	0	295.15	0//0	1//0	1//0	377450000	56	41			-1	6740200		6299500	440690		441170000	21794000	SPL_6027	SPL_21358			1.56505e+08	1.20825e+07					-4.33933	0.0531791907514451					-3.69521	0.0720812182741117	0	101.063	3.78562
sp|O35387|HAX1_MOUSE	Hax1	sp|O35387|HAX1_MOUSE	sp|O35387|HAX1_MOUSE	HCLS1-associated protein X-1 OS=Mus musculus OX=10090 GN=Hax1 PE=1 SV=1	1	2	7.1	31.654	280	0.0011236	12.975	0//0	1//0	0//0	26655000	15	2			-1	1777000		1777000			33681000		SPL_6027		SPL_6027		2.07165e+07														0	28.5084	0
sp|O35435|PYRD_MOUSE	Dhodh	sp|O35435|PYRD_MOUSE	sp|O35435|PYRD_MOUSE	Dihydroorotate dehydrogenase (quinone), mitochondrial OS=Mus musculus OX=10090 GN=Dhodh PE=1 SV=2	1	7	26.6	42.699	395	0	53.035	0//0	1//0	0//0	68274000	21	12			-1	3251100		3251100			89028000		SPL_6027		SPL_6027		4.26435e+07														0	52.1575	0
sp|O35465|FKBP8_MOUSE	Fkbp8	sp|O35465|FKBP8_MOUSE;sp|O35465-2|FKBP8_MOUSE	sp|O35465|FKBP8_MOUSE;sp|O35465-2|FKBP8_MOUSE	Peptidyl-prolyl cis-trans isomerase FKBP8 OS=Mus musculus OX=10090 GN=Fkbp8 PE=1 SV=2;Isoform 2 of Peptidyl-prolyl cis-trans isomerase FKBP8 OS=Mus musculus OX=10090 GN=Fkbp8	2	2	8.2	43.528	402	0	18.64	0//0	1//0	1//0	5489200	20	2			-1;-1	274460		274460			7472400		SPL_6027	SPL_21358			4.26627e+06	0													0	4.40317	0
sp|O35593|PSDE_MOUSE	Psmd14	sp|O35593|PSDE_MOUSE	sp|O35593|PSDE_MOUSE	26S proteasome non-ATPase regulatory subunit 14 OS=Mus musculus OX=10090 GN=Psmd14 PE=1 SV=2	1	13	71.9	34.577	310	0	211.49	1//0	1//0	1//0	699240000	14	58			-1	49946000	1090600	28558000	20297000	136010000	416110000	275570000				3.35083e+07	1.4901e+08	1.08265e+08	1.61325	0.726700251889169	1.01871	0.791726105563481	-0.594546	0.44971098265896	2.15282	0.790509259259259	1.69198	0.827496757457847	-0.460841	0.524873096446701	36.3206	458.156	174.355
sp|O35609|SCAM3_MOUSE	Scamp3	sp|O35609|SCAM3_MOUSE	sp|O35609|SCAM3_MOUSE	Secretory carrier-associated membrane protein 3 OS=Mus musculus OX=10090 GN=Scamp3 PE=1 SV=3	1	5	30.7	38.458	349	0	108.23	0//0	1//0	0//0	100330000	8	13			-1	12542000		12542000			128980000		SPL_6027		SPL_6027		6.06715e+07														0	201.212	0
sp|O35643|AP1B1_MOUSE	Ap1b1	sp|O35643|AP1B1_MOUSE	sp|O35643|AP1B1_MOUSE	AP-1 complex subunit beta-1 OS=Mus musculus OX=10090 GN=Ap1b1 PE=1 SV=2	1	15	23.5	103.93	943	0	152.47	1//0	1//0	1//0	307440000	43	42			-1	7149700	334310	4718800	2096500	85390000	249310000	71380000				3.30917e+07	9.64897e+07	4.41375e+07	1.5458	0.71536523929471	-0.258547	0.353780313837375	-1.80435	0.238150289017341	1.5439	0.695601851851852	0.415534	0.562905317769131	-1.12837	0.378680203045685	11.1336	75.7038	18.0094
sp|O35648|CETN3_MOUSE	Cetn3	sp|O35648|CETN3_MOUSE	sp|O35648|CETN3_MOUSE	Centrin-3 OS=Mus musculus OX=10090 GN=Cetn3 PE=1 SV=1	1	2	15	19.519	167	0	24.175	0//0	1//0	0//0	40229000	11	4			-1	3657200		3657200			54656000		SPL_6027		SPL_6027		3.12667e+07														0	58.6725	0
sp|O35654|DPOD2_MOUSE	Pold2	sp|O35654|DPOD2_MOUSE	sp|O35654|DPOD2_MOUSE	DNA polymerase delta subunit 2 OS=Mus musculus OX=10090 GN=Pold2 PE=1 SV=2	1	3	8.1	51.354	469	0	28.593	0//0	1//0	1//0	55338000	21	4			-1	2635100		158230	2476900			44078000	SPL_6027	SPL_21358			2.58252e+06	2.54661e+07											3.30173	0.969543147208122	0	2.53849	21.2771
sp|O35658|C1QBP_MOUSE	C1qbp	sp|O35658|C1QBP_MOUSE	sp|O35658|C1QBP_MOUSE	Complement component 1 Q subcomponent-binding protein, mitochondrial OS=Mus musculus OX=10090 GN=C1qbp PE=1 SV=1	1	10	54.7	31.013	278	0	323.31	1//0	1//0	1//0	3776000000	13	118			-1	290460000	3619600	122830000	164010000	293100000	1911100000	1774700000				1.23659e+08	9.13979e+08	7.9703e+08	2.70494	0.85264483627204	2.59811	0.948644793152639	-0.106828	0.564161849710983	2.88579	0.872685185185185	2.68827	0.933852140077821	-0.197527	0.579695431472081	120.545	1970.56	1408.88
sp|O35678|MGLL_MOUSE	Mgll	sp|O35678|MGLL_MOUSE;sp|O35678-2|MGLL_MOUSE	sp|O35678|MGLL_MOUSE	Monoglyceride lipase OS=Mus musculus OX=10090 GN=Mgll PE=1 SV=1	2	5	23.4	33.387	303	0	45.569	1//0	1//0	1//0	57971000	17	14			-1;-1	3410100	258660	2198000	953450	18796000	33759000	28993000				1.1556e+07	2.63575e+07	7.93566e+06	0.844846	0.622166246851385	0.625279	0.66904422253923	-0.219568	0.542196531791908	1.18957	0.62962962962963	-0.542225	0.30609597924773	-1.73179	0.272081218274112	8.61424	35.2626	8.19033
sp|O35691|PININ_MOUSE	Pnn	sp|O35691|PININ_MOUSE	sp|O35691|PININ_MOUSE	Pinin OS=Mus musculus OX=10090 GN=Pnn PE=1 SV=4	1	6	9.1	82.435	725	0	41.864	0//0	1//0	1//0	141660000	34	14			-1	4166300		2488800	1677500		98859000	59996000	SPL_6027	SPL_21358			4.67566e+07	2.79243e+07					-0.720506	0.419653179190751					-0.743646	0.455837563451777	0	39.9279	14.4101
sp|O35704|SPTC1_MOUSE	Sptlc1	sp|O35704|SPTC1_MOUSE	sp|O35704|SPTC1_MOUSE	Serine palmitoyltransferase 1 OS=Mus musculus OX=10090 GN=Sptlc1 PE=1 SV=2	1	9	26.6	52.534	473	0	130.5	0//0	1//0	0//0	337300000	20	20			-1	16865000		16865000			420730000		SPL_6027		SPL_6027		1.22664e+08														0	270.565	0
sp|O35737|HNRH1_MOUSE	Hnrnph1	sp|O35737|HNRH1_MOUSE	sp|O35737|HNRH1_MOUSE	Heterogeneous nuclear ribonucleoprotein H OS=Mus musculus OX=10090 GN=Hnrnph1 PE=1 SV=3	1	9	39.9	49.199	449	0	171.29	1//0	1//0	1//0	210010000	19	28			-1	11053000	759810	6822500	3471100	75894000	112100000	103740000				3.79386e+07	5.32259e+07	3.22895e+07	0.562729	0.55919395465995	0.450915	0.607703281027104	-0.111814	0.561849710982659	0.488461	0.494212962962963	-0.232603	0.361867704280156	-0.721063	0.45989847715736	25.3042	109.453	29.8175
sp|O35744|CHIL3_MOUSE	Chil3	sp|O35744|CHIL3_MOUSE;sp|Q91Z98|CHIL4_MOUSE	sp|O35744|CHIL3_MOUSE	Chitinase-like protein 3 OS=Mus musculus OX=10090 GN=Chil3 PE=1 SV=2	2	4	15.8	44.458	398	0	38.738	1//0	1//0	0//0	34386000	19	12			-1;-1	1809800	75102	1734700		13016000	33795000			SPL_M	SPL_6027	3.74995e+06	2.07056e+07		1.37652	0.69647355163728					2.46508	0.829861111111111					2.50115	27.8298	0
sp|O35864|CSN5_MOUSE	Cops5	sp|O35864|CSN5_MOUSE	sp|O35864|CSN5_MOUSE	COP9 signalosome complex subunit 5 OS=Mus musculus OX=10090 GN=Cops5 PE=1 SV=3	1	2	7.5	37.548	334	0	59.366	1//0	1//0	1//0	89375000	17	11			-1	5257400	136630	1164500	3956200	14107000	22140000					6.10402e+06	1.53864e+07	3.29282e+07	0.650244	0.579345088161209					1.33382	0.65162037037037	2.43149	0.913099870298314	1.09767	0.816243654822335	4.55024	18.6821	33.9846
sp|O35955|PSB10_MOUSE	Psmb10	sp|O35955|PSB10_MOUSE	sp|O35955|PSB10_MOUSE	Proteasome subunit beta type-10 OS=Mus musculus OX=10090 GN=Psmb10 PE=1 SV=1	1	2	11.4	29.063	273	0.0011662	14.538	0//0	1//0	1//0	46919000	12	3			-1	3909900		1499100	2410800		17566000	28743000	SPL_6027	SPL_21358			1.39816e+07	1.41635e+07					0.710425	0.754913294797688					0.0186507	0.625380710659899	0	24.0501	20.7093
sp|O54692|ZW10_MOUSE	Zw10	sp|O54692|ZW10_MOUSE	sp|O54692|ZW10_MOUSE	Centromere/kinetochore protein zw10 homolog OS=Mus musculus OX=10090 GN=Zw10 PE=1 SV=3	1	14	26.3	88.062	779	0	259.43	0//0	1//0	0//0	167440000	42	27			-1	3986800		3986800			209620000		SPL_6027		SPL_6027		6.26383e+07														0	63.9603	0
sp|O54734|OST48_MOUSE	Ddost	sp|O54734|OST48_MOUSE	sp|O54734|OST48_MOUSE	Dolichyl-diphosphooligosaccharide--protein glycosyltransferase 48 kDa subunit OS=Mus musculus OX=10090 GN=Ddost PE=1 SV=2	1	25	72.3	49.027	441	0	323.31	1//0	1//0	1//0	3762300000	19	122			-1	198020000	7136900	157580000	33294000	580410000	3778500000	698090000				2.70224e+08	1.338e+09	2.31768e+08	2.70267	0.851385390428212	0.266341	0.532097004279601	-2.43633	0.16878612716763	2.30785	0.80787037037037	-0.221474	0.367055771725032	-2.52932	0.170558375634518	237.683	2528.06	286.002
sp|O54774|AP3D1_MOUSE	Ap3d1	sp|O54774|AP3D1_MOUSE	sp|O54774|AP3D1_MOUSE	AP-3 complex subunit delta-1 OS=Mus musculus OX=10090 GN=Ap3d1 PE=1 SV=1	1	4	3.6	135.08	1199	0	24.972	1//0	1//0	1//0	2937200000	56	36			-1	52449000	37226000	3384700	11838000	8463400000	1154800000	876900000				5.47849e+09	1.47313e+08	3.24576e+08	-2.87359	0.0415617128463476	-3.27075	0.0299572039942939	-0.397159	0.497109826589595	-5.21682	0.00578703703703704	-4.07715	0.0220492866407263	1.13967	0.822335025380711	1239.75	54.3008	101.691
sp|O54910|IKBE_MOUSE	Nfkbie	sp|O54910|IKBE_MOUSE	sp|O54910|IKBE_MOUSE	NF-kappa-B inhibitor epsilon OS=Mus musculus OX=10090 GN=Nfkbie PE=1 SV=2	1	7	34.1	39.2	364	0	106.74	1//0	1//0	0//0	97595000	14	21			-1	6971000	144410	6826600		8493100	119940000			SPL_M	SPL_6027	5.31316e+06	4.55085e+07		3.81988	0.915617128463476					3.0985	0.894675925925926					4.80934	109.519	0
sp|O54916-3|REPS1_MOUSE	Reps1	sp|O54916-3|REPS1_MOUSE;sp|O54916-4|REPS1_MOUSE;sp|O54916|REPS1_MOUSE;sp|O54916-2|REPS1_MOUSE;sp|Q80XA6|REPS2_MOUSE	sp|O54916-3|REPS1_MOUSE;sp|O54916-4|REPS1_MOUSE;sp|O54916|REPS1_MOUSE	Isoform 3 of RalBP1-associated Eps domain-containing protein 1 OS=Mus musculus OX=10090 GN=Reps1;Isoform 4 of RalBP1-associated Eps domain-containing protein 1 OS=Mus musculus OX=10090 GN=Reps1;RalBP1-associated Eps domain-containing protein 1 OS=Mus muscu	5	4	6.8	77.613	716	0	27.099	0//0	1//0	0//0	21099000	31	3			-1;-1;-1;-1;-1	680610		680610			28537000		SPL_6027		SPL_6027		1.63983e+07														0	10.919	0
sp|O54941|SMCE1_MOUSE	Smarce1	sp|O54941|SMCE1_MOUSE	sp|O54941|SMCE1_MOUSE	SWI/SNF-related matrix-associated actin-dependent regulator of chromatin subfamily E member 1 OS=Mus musculus OX=10090 GN=Smarce1 PE=1 SV=1	1	8	33.1	46.638	411	0	165.72	1//0	1//0	1//0	279620000	19	38			-1	14717000	2836900	5576000	6304100	234510000	117630000	130830000				9.39053e+07	5.06884e+07	5.39148e+07	-0.995393	0.224181360201511	-0.841956	0.219686162624822	0.153437	0.623121387283237	-0.889549	0.267361111111111	-0.800525	0.261997405966278	0.0890244	0.644670050761421	94.4783	89.4559	54.1535
sp|O54946|DNJB6_MOUSE	Dnajb6	sp|O54946|DNJB6_MOUSE;sp|O75190-2|DNJB6_HUMAN;CON__sp|O75190-2|DNJB6_HUMAN;sp|O54946-2|DNJB6_MOUSE;sp|O75190-3|DNJB6_HUMAN;CON__sp|O75190-3|DNJB6_HUMAN;sp|O75190|DNJB6_HUMAN;CON__sp|O75190|DNJB6_HUMAN;sp|Q9QYI8|DNJB7_MOUSE	sp|O54946|DNJB6_MOUSE;sp|O75190-2|DNJB6_HUMAN;CON__sp|O75190-2|DNJB6_HUMAN;sp|O54946-2|DNJB6_MOUSE;sp|O75190-3|DNJB6_HUMAN;CON__sp|O75190-3|DNJB6_HUMAN;sp|O75190|DNJB6_HUMAN;CON__sp|O75190|DNJB6_HUMAN	DnaJ homolog subfamily B member 6 OS=Mus musculus OX=10090 GN=Dnajb6 PE=1 SV=4;Isoform B of DnaJ homolog subfamily B member 6 OS=Homo sapiens GN=DNAJB6;;Isoform B of DnaJ homolog subfamily B member 6 OS=Mus musculus OX=10090 GN=Dnajb6;Isoform a of DnaJ hom	9	4	15.9	39.807	365	0	73.118	1//0	1//0	1//0	171050000	13	19		+	-1;-1;-1;-1;-1;-1;-1;-1;-1	13157000	479060	7832600	4845700	37460000	124700000	49721000				1.63666e+07	7.91381e+07	3.08416e+07	1.73504	0.746851385390428	0.408504	0.587731811697575	-1.32653	0.313294797687861	2.27362	0.802083333333333	0.914125	0.680933852140078	-1.3595	0.336040609137056	15.9543	125.659	41.6256
sp|O54956|DPOE2_MOUSE	Pole2	sp|O54956|DPOE2_MOUSE	sp|O54956|DPOE2_MOUSE	DNA polymerase epsilon subunit 2 OS=Mus musculus OX=10090 GN=Pole2 PE=2 SV=2	1	2	9.1	59.386	527	0.001194	15.868	0//0	1//0	1//0	38146000	25	5			-1	1525800		818190	707660		16970000	22820000	SPL_6027	SPL_21358			1.58976e+07	8.66187e+06					0.427312	0.689017341040462					-0.876062	0.431472081218274	0	13.1262	6.07895
sp|O54962|BAF_MOUSE	Banf1	sp|O54962|BAF_MOUSE	sp|O54962|BAF_MOUSE	Barrier-to-autointegration factor OS=Mus musculus OX=10090 GN=Banf1 PE=1 SV=1	1	4	50.6	10.102	89	0	35.212	1//0	1//0	0//0	67196000	5	13			-1	13439000	9485700	3953500		226820000	18308000			SPL_M	SPL_6027	1.24642e+08	1.53636e+07		-3.631	0.0188916876574307					-3.0202	0.0532407407407407					315.906	63.4261	0
sp|O54984|GET3_MOUSE	Get3	sp|O54984|GET3_MOUSE	sp|O54984|GET3_MOUSE	ATPase GET3 OS=Mus musculus OX=10090 GN=Get3 PE=1 SV=2	1	4	18.1	38.822	348	0	22.96	0//0	1//0	0//0	26006000	15	5			-1	1733700		1733700			31168000		SPL_6027		SPL_6027		2.0212e+07														0	27.8138	0
sp|O55013|TPPC3_MOUSE	Trappc3	sp|O55013|TPPC3_MOUSE	sp|O55013|TPPC3_MOUSE	Trafficking protein particle complex subunit 3 OS=Mus musculus OX=10090 GN=Trappc3 PE=1 SV=1	1	3	16.1	20.302	180	0	20.913	1//0	1//0	1//0	58636000	9	12			-1	6515100	644830	4124000	1746300	27158000	29124000	34299000				1.52515e+07	2.88469e+07	7.69497e+06	0.100831	0.459697732997481	0.336789	0.570613409415121	0.235958	0.64393063583815	0.919464	0.577546296296296	-0.986964	0.234760051880674	-1.90643	0.241624365482234	21.475	66.1614	15.0011
sp|O55022|PGRC1_MOUSE	Pgrmc1	sp|O55022|PGRC1_MOUSE	sp|O55022|PGRC1_MOUSE	Membrane-associated progesterone receptor component 1 OS=Mus musculus OX=10090 GN=Pgrmc1 PE=1 SV=4	1	9	51.8	21.694	195	0	74.975	1//0	1//0	0//0	278800000	8	17			-1	34849000	159340	34690000		12685000	344400000			SPL_M	SPL_6027	3.34989e+06	1.50904e+08		4.76289	0.952141057934509					5.49337	0.983796296296296					5.30656	556.532	0
sp|O55023|IMPA1_MOUSE	Impa1	sp|O55023|IMPA1_MOUSE	sp|O55023|IMPA1_MOUSE	Inositol monophosphatase 1 OS=Mus musculus OX=10090 GN=Impa1 PE=1 SV=1	1	7	27.8	30.436	277	0	44.303	1//0	0//0	0//0	53707000	16	15			-1	3356700	3356700			247930000			SPL_M	SPL_M		8.35536e+07															111.789	0	0
sp|O55029|COPB2_MOUSE	Copb2	sp|O55029|COPB2_MOUSE	sp|O55029|COPB2_MOUSE	Coatomer subunit beta OS=Mus musculus OX=10090 GN=Copb2 PE=1 SV=2	1	22	31.9	102.45	905	0	284.13	1//0	1//0	1//0	937560000	45	86			-1	20835000	719200	15317000	4798400	213400000	671870000	338410000				5.41738e+07	1.97634e+08	5.93023e+07	1.65462	0.732997481108312	0.665212	0.676176890156919	-0.98941	0.369942196531792	1.86716	0.741898148148148	0.130491	0.463035019455253	-1.73667	0.27005076142132	23.9518	245.731	41.2192
sp|O55102|BL1S1_MOUSE	Bloc1s1	sp|O55102|BL1S1_MOUSE	sp|O55102|BL1S1_MOUSE	Biogenesis of lysosome-related organelles complex 1 subunit 1 OS=Mus musculus OX=10090 GN=Bloc1s1 PE=1 SV=2	1	2	32	14.281	125	0	32.522	0//0	1//0	0//0	13437000	7	5			-1	1919500		1919500			16581000		SPL_6027		SPL_6027		1.04432e+07														0	30.7946	0
sp|O55106|STRN_MOUSE	Strn	sp|O55106|STRN_MOUSE	sp|O55106|STRN_MOUSE	Striatin OS=Mus musculus OX=10090 GN=Strn PE=1 SV=2	1	12	24.6	85.965	780	0	168	0//0	1//0	0//0	141850000	36	27			-1	3940300		3940300			178170000		SPL_6027		SPL_6027		5.50883e+07														0	63.2143	0
sp|O55128|SAP18_MOUSE	Sap18	sp|O55128|SAP18_MOUSE	sp|O55128|SAP18_MOUSE	Histone deacetylase complex subunit SAP18 OS=Mus musculus OX=10090 GN=Sap18 PE=1 SV=1	1	11	71.9	17.595	153	0	182.5	1//0	1//0	1//0	422920000	12	35			-1	35243000	210210	30405000	4627800	16181000	484390000	26262000				6.62904e+06	1.79473e+08	2.7189e+07	4.9038	0.954659949622166	0.698676	0.686162624821683	-4.20512	0.0601156069364162	4.75883	0.96875	2.03615	0.865110246433204	-2.72267	0.150253807106599	7.0007	487.788	39.7538
sp|O55131|SEPT7_MOUSE	Septin7	sp|O55131|SEPT7_MOUSE;sp|Q9DA97|SEP14_MOUSE	sp|O55131|SEPT7_MOUSE	Septin-7 OS=Mus musculus OX=10090 GN=Septin7 PE=1 SV=1	2	34	60.8	50.549	436	0	323.31	1//0	1//0	1//0	5336500000	22	228			-1;-1	242570000	6901600	138170000	97494000	1129200000	3103000000	2001300000				1.73772e+08	7.40405e+08	5.32542e+08	1.45836	0.704030226700252	0.825636	0.733238231098431	-0.632726	0.440462427745665	2.09112	0.778935185185185	1.6157	0.817120622568093	-0.475419	0.521827411167513	229.846	2216.66	837.494
sp|O55142|RL35A_MOUSE	Rpl35a	sp|O55142|RL35A_MOUSE	sp|O55142|RL35A_MOUSE	60S ribosomal protein L35a OS=Mus musculus OX=10090 GN=Rpl35a PE=1 SV=2	1	2	7.3	12.554	110	0.0011093	12.613	1//0	1//0	0//0	50296000	7	4			-1	7185200	796720	6388400		28108000	55966000			SPL_M	SPL_6027	1.46563e+07	3.47556e+07		0.99357	0.649874055415617					1.24573	0.636574074074074					26.5334	102.489	0
sp|O55143|AT2A2_MOUSE	Atp2a2	sp|O55143|AT2A2_MOUSE;sp|O55143-2|AT2A2_MOUSE	sp|O55143|AT2A2_MOUSE;sp|O55143-2|AT2A2_MOUSE	Sarcoplasmic/endoplasmic reticulum calcium ATPase 2 OS=Mus musculus OX=10090 GN=Atp2a2 PE=1 SV=2;Isoform 2 of Sarcoplasmic/endoplasmic reticulum calcium ATPase 2 OS=Mus musculus OX=10090 GN=Atp2a2	2	36	42	114.86	1044	0	323.31	0//1	1//0	1//0	2460200000	47	123			-1;-1	52344000		51866000	478120		3155000000	23099000	SPL_6027	SPL_21358			4.63287e+08	1.10022e+07					-7.09367	0.00578034682080925					-5.39605	0.0182741116751269	0	832.087	4.10715
sp|O55222|ILK_MOUSE	Ilk	sp|O55222|ILK_MOUSE	sp|O55222|ILK_MOUSE	Integrin-linked protein kinase OS=Mus musculus OX=10090 GN=Ilk PE=1 SV=2	1	11	29	51.373	452	0	150.47	1//0	1//0	1//0	396030000	24	36			-1	16501000	474840	5513700	10513000	96205000	165810000	178870000				2.99493e+07	6.17531e+07	1.05917e+08	0.785347	0.613350125944584	0.894728	0.758915834522111	0.10938	0.611560693641618	1.04399	0.611111111111111	1.82234	0.844357976653696	0.778349	0.768527918781726	15.8138	88.4564	90.3088
sp|O70131|NINJ1_MOUSE	Ninj1	sp|O70131|NINJ1_MOUSE	sp|O70131|NINJ1_MOUSE	Ninjurin-1 OS=Mus musculus OX=10090 GN=Ninj1 PE=1 SV=1	1	4	21.7	16.555	152	0	165.98	0//0	1//0	0//0	109290000	4	17			-1	27322000		27322000			142330000		SPL_6027		SPL_6027		7.71599e+07														0	438.327	0
sp|O70152|DPM1_MOUSE	Dpm1	sp|O70152|DPM1_MOUSE	sp|O70152|DPM1_MOUSE	Dolichol-phosphate mannosyltransferase subunit 1 OS=Mus musculus OX=10090 GN=Dpm1 PE=1 SV=1	1	11	55	29.174	260	0	127.9	0//0	1//0	1//0	416120000	16	34			-1	26008000		22288000	3720100		473380000	41687000	SPL_6027	SPL_21358			1.66652e+08	2.91419e+07					-3.50533	0.102890173410405					-2.51567	0.174619289340102	0	357.567	31.9564
sp|O70172|PI42A_MOUSE	Pip4k2a	sp|O70172|PI42A_MOUSE	sp|O70172|PI42A_MOUSE	Phosphatidylinositol 5-phosphate 4-kinase type-2 alpha OS=Mus musculus OX=10090 GN=Pip4k2a PE=1 SV=1	1	2	6.2	46.151	405	0.0011255	12.987	1//0	0//0	1//0	23757000	18	3			-1	1319900	133290		1186600	11894000			SPL_M		SPL_21358	6.30506e+06		1.04569e+07									0.729876	0.640726329442283			4.439	0	10.1931
sp|O70194|EIF3D_MOUSE	Eif3d	sp|O70194|EIF3D_MOUSE	sp|O70194|EIF3D_MOUSE	Eukaryotic translation initiation factor 3 subunit D OS=Mus musculus OX=10090 GN=Eif3d PE=1 SV=2	1	3	5.8	63.988	548	0.00062189	18.293	0//0	1//0	0//0	11795000	24	2			-1	491450		491450			16419000		SPL_6027		SPL_6027		9.16699e+06														0	7.88434	0
sp|O70251|EF1B_MOUSE	Eef1b	sp|O70251|EF1B_MOUSE	sp|O70251|EF1B_MOUSE	Elongation factor 1-beta OS=Mus musculus OX=10090 GN=Eef1b PE=1 SV=5	1	7	59.1	24.693	225	0	192.83	1//0	1//0	1//0	459000000	12	42			-1	38250000	6022300	15103000	17125000	306070000	217030000	217600000				1.47642e+08	9.66301e+07	6.75192e+07	-0.495967	0.332493702770781	-0.492183	0.29243937232525	0.00378408	0.58728323699422	-0.611554	0.315972222222222	-1.12873	0.216601815823606	-0.517176	0.508629441624366	200.563	242.298	147.107
sp|O70252|HMOX2_MOUSE	Hmox2	sp|O70252|HMOX2_MOUSE	sp|O70252|HMOX2_MOUSE	Heme oxygenase 2 OS=Mus musculus OX=10090 GN=Hmox2 PE=1 SV=1	1	18	64.1	35.738	315	0	303.86	0//0	1//0	0//0	552360000	18	44			-1	30687000		30687000			715330000		SPL_6027		SPL_6027		1.56015e+08														0	492.312	0
sp|O70325-2|GPX4_MOUSE	Gpx4	sp|O70325-2|GPX4_MOUSE;sp|O70325|GPX4_MOUSE;sp|O70325-3|GPX4_MOUSE	sp|O70325-2|GPX4_MOUSE;sp|O70325|GPX4_MOUSE;sp|O70325-3|GPX4_MOUSE	Isoform Cytoplasmic of Phospholipid hydroperoxide glutathione peroxidase OS=Mus musculus OX=10090 GN=Gpx4;Phospholipid hydroperoxide glutathione peroxidase OS=Mus musculus OX=10090 GN=Gpx4 PE=1 SV=4;Isoform Nuclear of Phospholipid hydroperoxide glutathione	3	6	35.9	19.522	170	0	40.4	1//0	1//0	0//0	54309000	11	12			-1;-1;-1	4937200	4004700	932500		208550000	7698200			SPL_M	SPL_6027	7.97504e+07	7.97226e+06		-4.75973	0.00629722921914358					-3.32243	0.0416666666666667					133.37	14.9601	0
sp|O70370|CATS_MOUSE	Ctss	sp|O70370|CATS_MOUSE	sp|O70370|CATS_MOUSE	Cathepsin S OS=Mus musculus OX=10090 GN=Ctss PE=1 SV=2	1	6	33.8	38.474	340	0	82.942	1//0	1//0	0//0	54599000	13	14			-1	4199900	291390	3908500		19658000	61227000			SPL_M	SPL_6027	9.95478e+06	3.3073e+07		1.63905	0.731738035264484					1.73219	0.72337962962963					9.70426	62.7041	0
sp|O70378|EMC8_MOUSE	Emc8	sp|O70378|EMC8_MOUSE	sp|O70378|EMC8_MOUSE	ER membrane protein complex subunit 8 OS=Mus musculus OX=10090 GN=Emc8 PE=1 SV=1	1	6	39.6	23.348	207	0	66.99	1//0	1//0	1//0	109900000	11	17			-1	9990900	698280	8355100	937590	29953000	101410000	27980000				2.01856e+07	4.42871e+07	5.0492e+06	1.75943	0.749370277078086	-0.0983045	0.405135520684736	-1.85773	0.227745664739884	1.13356	0.622685185185185	-1.9992	0.111543450064851	-3.13276	0.109644670050761	23.2551	134.041	8.05409
sp|O70404|VAMP8_MOUSE	Vamp8	sp|O70404|VAMP8_MOUSE	sp|O70404|VAMP8_MOUSE	Vesicle-associated membrane protein 8 OS=Mus musculus OX=10090 GN=Vamp8 PE=1 SV=1	1	4	40.6	11.451	101	0	30.788	0//0	1//0	0//0	76556000	6	9			-1	12759000		12759000			94323000		SPL_6027		SPL_6027		5.43062e+07														0	204.693	0
sp|O70435|PSA3_MOUSE	Psma3	sp|O70435|PSA3_MOUSE	sp|O70435|PSA3_MOUSE	Proteasome subunit alpha type-3 OS=Mus musculus OX=10090 GN=Psma3 PE=1 SV=3	1	2	11	28.405	255	0.00060606	16.992	0//0	1//0	1//0	18659000	12	2			-1	1554900		591360	963550		8304700		SPL_6027	SPL_21358			5.51541e+06	5.661e+06											0.0375879	0.633502538071066	0	9.4872	8.27709
sp|O70439|STX7_MOUSE	Stx7	sp|O70439|STX7_MOUSE	sp|O70439|STX7_MOUSE	Syntaxin-7 OS=Mus musculus OX=10090 GN=Stx7 PE=1 SV=3	1	6	26.1	29.82	261	0	110.2	0//0	1//0	0//0	65517000	12	11			-1	5459700		5459700			84028000		SPL_6027		SPL_6027		3.43282e+07														0	87.5901	0
sp|O70503|DHB12_MOUSE	Hsd17b12	sp|O70503|DHB12_MOUSE;sp|O70503-2|DHB12_MOUSE	sp|O70503|DHB12_MOUSE;sp|O70503-2|DHB12_MOUSE	Very-long-chain 3-oxoacyl-CoA reductase OS=Mus musculus OX=10090 GN=Hsd17b12 PE=1 SV=1;Isoform 2 of Very-long-chain 3-oxoacyl-CoA reductase OS=Mus musculus OX=10090 GN=Hsd17b12	2	5	18.3	34.741	312	0	30.69	0//0	1//0	1//0	81448000	16	8			-1;-1	5090500		4614600	475920		93204000	8587200	SPL_6027	SPL_21358			4.56957e+07	3.72807e+06					-3.44013	0.105202312138728					-3.61556	0.0761421319796954	0	74.0321	4.08825
sp|O70572|NSMA_MOUSE	Smpd2	sp|O70572|NSMA_MOUSE	sp|O70572|NSMA_MOUSE	Sphingomyelin phosphodiesterase 2 OS=Mus musculus OX=10090 GN=Smpd2 PE=1 SV=1	1	3	8.6	47.466	419	0.00060569	16.95	0//0	1//0	0//0	26535000	25	6			-1	1061400		1061400			35331000		SPL_6027		SPL_6027		2.0623e+07														0	17.0281	0
sp|O70591|PFD2_MOUSE	Pfdn2	sp|O70591|PFD2_MOUSE	sp|O70591|PFD2_MOUSE	Prefoldin subunit 2 OS=Mus musculus OX=10090 GN=Pfdn2 PE=1 SV=2	1	6	48.7	16.534	154	0	219.99	1//0	1//0	1//0	823190000	10	31			-1	82319000	2101400	12739000	67479000	191450000	160790000	470950000				5.52254e+07	8.5904e+07	2.81949e+08	-0.25179	0.385390428211587	1.29861	0.838801711840228	1.5504	0.901734104046243	0.637392	0.521990740740741	2.35203	0.90402075226978	1.71464	0.876142131979695	69.9837	204.372	579.659
sp|O88188|LY86_MOUSE	Ly86	sp|O88188|LY86_MOUSE	sp|O88188|LY86_MOUSE	Lymphocyte antigen 86 OS=Mus musculus OX=10090 GN=Ly86 PE=1 SV=1	1	3	46.9	17.811	162	0	45.364	0//0	1//0	0//0	44185000	5	6			-1	8837000		8837000			55417000		SPL_6027		SPL_6027		3.43412e+07														0	141.772	0
sp|O88351|IKKB_MOUSE	Ikbkb	sp|O88351|IKKB_MOUSE;sp|Q60680-2|IKKA_MOUSE;sp|Q60680-3|IKKA_MOUSE;sp|Q60680|IKKA_MOUSE	sp|O88351|IKKB_MOUSE	Inhibitor of nuclear factor kappa-B kinase subunit beta OS=Mus musculus OX=10090 GN=Ikbkb PE=1 SV=1	4	3	3.4	86.689	757	0	18.774	0//0	1//0	1//0	34859000	43	7			-1;-1;-1;-1	810670		481300	329370		18616000	20185000	SPL_6027	SPL_21358			1.60851e+07	6.93419e+06					0.11674	0.616184971098266					-1.21392	0.353299492385787	0	7.7215	2.82936
sp|O88441|MTX2_MOUSE	Mtx2	sp|O88441|MTX2_MOUSE	sp|O88441|MTX2_MOUSE	Metaxin-2 OS=Mus musculus OX=10090 GN=Mtx2 PE=1 SV=1	1	13	66.2	29.758	263	0	323.31	0//0	1//0	1//0	445070000	12	42			-1	37089000		34705000	2384200		535100000	21360000	SPL_6027	SPL_21358			1.47293e+08	1.40078e+07					-4.64682	0.0393063583815029					-3.39439	0.0913705583756345	0	556.773	20.4808
sp|O88456|CPNS1_MOUSE	Capns1	sp|O88456|CPNS1_MOUSE;sp|Q9D7J7|CPNS2_MOUSE	sp|O88456|CPNS1_MOUSE	Calpain small subunit 1 OS=Mus musculus OX=10090 GN=Capns1 PE=1 SV=1	2	7	45.4	28.463	269	0	203.2	1//0	1//0	1//0	455600000	11	40			-1;-1	41418000	4264800	13939000	23214000	207500000	168690000	261040000				1.10138e+08	9.38009e+07	1.25022e+08	-0.298737	0.3727959697733	0.33116	0.56490727532097	0.629896	0.732947976878613	-0.231639	0.384259259259259	0.18287	0.478599221789883	0.41451	0.704568527918782	142.032	223.624	199.413
sp|O88487|DC1I2_MOUSE	Dync1i2	sp|O88487|DC1I2_MOUSE;sp|O88485-2|DC1I1_MOUSE;sp|O88485|DC1I1_MOUSE	sp|O88487|DC1I2_MOUSE	Cytoplasmic dynein 1 intermediate chain 2 OS=Mus musculus OX=10090 GN=Dync1i2 PE=1 SV=1	3	28	67.6	68.393	612	0	323.31	1//0	1//0	1//0	1945000000	19	123			-1;-1;-1	102370000	1282100	84525000	16559000	172710000	1960700000	313160000				5.06375e+07	4.43653e+08	9.16043e+07	3.50495	0.90176322418136	0.858548	0.743223965763195	-2.6464	0.149132947976879	3.13115	0.898148148148148	0.855208	0.666666666666667	-2.27594	0.201015228426396	42.6982	1356.04	142.245
sp|O88522|NEMO_MOUSE	Ikbkg	sp|O88522|NEMO_MOUSE	sp|O88522|NEMO_MOUSE	NF-kappa-B essential modulator OS=Mus musculus OX=10090 GN=Ikbkg PE=1 SV=2	1	10	29.1	47.972	412	0	119.23	0//0	1//0	1//0	113530000	21	23			-1	5406200		5001900	404300		135170000		SPL_6027	SPL_21358			3.77435e+07	4.15686e+06											-3.18266	0.10761421319797	0	80.2456	3.47302
sp|O88531|PPT1_MOUSE	Ppt1	sp|O88531|PPT1_MOUSE	sp|O88531|PPT1_MOUSE	Palmitoyl-protein thioesterase 1 OS=Mus musculus OX=10090 GN=Ppt1 PE=1 SV=2	1	9	41.2	34.49	306	0	189.03	0//0	1//0	0//0	134630000	14	28			-1	9616400		9616400			174290000		SPL_6027		SPL_6027		5.63012e+07														0	154.276	0
sp|O88543|CSN3_MOUSE	Cops3	sp|O88543|CSN3_MOUSE	sp|O88543|CSN3_MOUSE	COP9 signalosome complex subunit 3 OS=Mus musculus OX=10090 GN=Cops3 PE=1 SV=3	1	7	20.3	47.832	423	0	106.59	0//0	1//0	1//0	171440000	25	19			-1	6857600		2701200	4156400		66634000	110130000	SPL_6027	SPL_21358			3.26459e+07	4.14401e+07					0.724877	0.761849710982659					0.344127	0.69238578680203	0	43.3354	35.7043
sp|O88544|CSN4_MOUSE	Cops4	sp|O88544|CSN4_MOUSE	sp|O88544|CSN4_MOUSE	COP9 signalosome complex subunit 4 OS=Mus musculus OX=10090 GN=Cops4 PE=1 SV=1	1	9	29.8	46.284	406	0	105.26	1//0	1//0	1//0	214970000	26	21			-1	8268200	327710	3944800	3995700	57029000	80836000	120940000				2.23915e+07	5.04968e+07	5.0863e+07	0.503302	0.545340050377834	1.08452	0.800285306704708	0.581222	0.721387283236994	1.17324	0.627314814814815	1.18367	0.735408560311284	0.0104256	0.623350253807107	10.9138	63.2865	34.3239
sp|O88569-3|ROA2_MOUSE	Hnrnpa2b1	sp|O88569-3|ROA2_MOUSE;sp|O88569-2|ROA2_MOUSE;sp|O88569|ROA2_MOUSE	sp|O88569-3|ROA2_MOUSE;sp|O88569-2|ROA2_MOUSE;sp|O88569|ROA2_MOUSE	Isoform 3 of Heterogeneous nuclear ribonucleoproteins A2/B1 OS=Mus musculus OX=10090 GN=Hnrnpa2b1;Isoform 2 of Heterogeneous nuclear ribonucleoproteins A2/B1 OS=Mus musculus OX=10090 GN=Hnrnpa2b1;Heterogeneous nuclear ribonucleoproteins A2/B1 OS=Mus muscul	3	2	7.6	32.46	301	0.0021459	11.38	1//0	1//0	1//0	961610	17	4			-1;-1;-1	56565	56565			4510600						2.5271e+06	0	0													1.8838	0	0
sp|O88587-2|COMT_MOUSE	Comt	sp|O88587-2|COMT_MOUSE;sp|O88587|COMT_MOUSE	sp|O88587-2|COMT_MOUSE;sp|O88587|COMT_MOUSE	Isoform Soluble of Catechol O-methyltransferase OS=Mus musculus OX=10090 GN=Comt;Catechol O-methyltransferase OS=Mus musculus OX=10090 GN=Comt PE=1 SV=2	2	3	21.6	24.707	222	0	21.997	0//0	1//0	0//0	43191000	13	8			-1;-1	3322400		3322400			54845000		SPL_6027		SPL_6027		3.35683e+07														0	53.3013	0
sp|O88630|GOSR1_MOUSE	Gosr1	sp|O88630|GOSR1_MOUSE	sp|O88630|GOSR1_MOUSE	Golgi SNAP receptor complex member 1 OS=Mus musculus OX=10090 GN=Gosr1 PE=1 SV=2	1	5	26.4	28.489	250	0	88.985	0//0	1//0	0//0	41533000	16	9			-1	2595800		2595800			55477000		SPL_6027		SPL_6027		2.70984e+07														0	41.6445	0
sp|O88653|LTOR3_MOUSE	Lamtor3	sp|O88653|LTOR3_MOUSE	sp|O88653|LTOR3_MOUSE	Ragulator complex protein LAMTOR3 OS=Mus musculus OX=10090 GN=Lamtor3 PE=1 SV=1	1	3	50	13.553	124	0	41.421	1//0	1//0	1//0	278330000	6	25			-1	46388000	1262800	35727000	9398500	78347000	219940000	58183000				1.9912e+07	1.66606e+08	2.76088e+07	1.48916	0.707808564231738	-0.42928	0.310984308131241	-1.91844	0.224277456647399	3.06472	0.891203703703704	0.471487	0.579766536964981	-2.59324	0.161421319796954	42.0555	573.169	80.7351
sp|O88668|CREG1_MOUSE	Creg1	sp|O88668|CREG1_MOUSE	sp|O88668|CREG1_MOUSE	Protein CREG1 OS=Mus musculus OX=10090 GN=Creg1 PE=1 SV=1	1	3	18.6	24.452	220	0	102.64	1//0	1//0	1//0	142210000	9	10			-1	15801000	116890	1206000	14478000	6588900	12238000					2.76475e+06	8.43617e+06	6.37953e+07	0.893258	0.630982367758186					1.60944	0.708333333333333	4.52823	0.990920881971466	2.91879	0.956345177664975	3.89283	19.3479	124.369
sp|O88685|PRS6A_MOUSE	Psmc3	sp|O88685|PRS6A_MOUSE	sp|O88685|PRS6A_MOUSE	26S proteasome regulatory subunit 6A OS=Mus musculus OX=10090 GN=Psmc3 PE=1 SV=2	1	28	68.1	49.548	442	0	323.31	1//0	1//0	1//0	2511700000	26	171			-1	96604000	3928600	72171000	20505000	578260000	1991200000	757030000				9.92075e+07	3.99027e+08	1.16954e+08	1.78385	0.750629722921914	0.388632	0.583452211126961	-1.39522	0.302890173410405	2.00796	0.760416666666667	0.237415	0.491569390402075	-1.77055	0.26497461928934	130.836	1157.84	176.142
sp|O88738-3|BIRC6_MOUSE	Birc6	sp|O88738-3|BIRC6_MOUSE;sp|O88738-2|BIRC6_MOUSE;sp|O88738|BIRC6_MOUSE	sp|O88738-3|BIRC6_MOUSE;sp|O88738-2|BIRC6_MOUSE;sp|O88738|BIRC6_MOUSE	Isoform 3 of Baculoviral IAP repeat-containing protein 6 OS=Mus musculus OX=10090 GN=Birc6;Isoform 2 of Baculoviral IAP repeat-containing protein 6 OS=Mus musculus OX=10090 GN=Birc6;Baculoviral IAP repeat-containing protein 6 OS=Mus musculus OX=10090 GN=Bi	3	11	3.5	530.51	4867	0	83.71	0//0	1//0	1//0	77167000	189	21			-1;-1;-1	408290		204310	203980		40733000	40567000	SPL_6027	SPL_21358			1.91992e+07	1.88747e+07					-0.00589146	0.583815028901734					-0.0245897	0.613197969543147	0	3.27775	1.75223
sp|O88746|TOM1_MOUSE	Tom1	sp|O88746|TOM1_MOUSE;sp|O88746-2|TOM1_MOUSE	sp|O88746|TOM1_MOUSE	Target of Myb protein 1 OS=Mus musculus OX=10090 GN=Tom1 PE=1 SV=1	2	6	22.6	54.325	492	0	37.325	1//0	1//0	1//0	40064000	21	11			-1;-1	1907800	452080	852310	603420	24846000	21639000	31308000				2.03952e+07	1.39109e+07	6.20406e+06	-0.19938	0.400503778337531	0.333518	0.567760342368046	0.532898	0.714450867052023	-0.55201	0.326388888888889	-1.71694	0.150453955901427	-1.16493	0.365482233502538	15.0558	13.6736	5.1835
sp|O88844|IDHC_MOUSE	Idh1	sp|O88844|IDHC_MOUSE	sp|O88844|IDHC_MOUSE	Isocitrate dehydrogenase [NADP] cytoplasmic OS=Mus musculus OX=10090 GN=Idh1 PE=1 SV=2	1	6	18.8	46.674	414	0	111.15	1//0	1//0	1//0	288230000	26	19			-1	11086000	559800	233220	10293000	59368000		234140000				3.82496e+07	4.71278e+06	1.3102e+08			1.97961	0.920114122681883			-3.0208	0.0520833333333333	1.77627	0.836575875486381	4.79706	0.996954314720812	18.6432	3.74155	88.419
sp|O88874|CCNK_MOUSE	Ccnk	sp|O88874|CCNK_MOUSE	sp|O88874|CCNK_MOUSE	Cyclin-K OS=Mus musculus OX=10090 GN=Ccnk PE=1 SV=3	1	5	20.4	61.363	554	0	323.31	1//0	1//0	1//0	170960000	18	22			-1	9497800	71602	2000400	7425800	12451000	48684000	107240000				3.38695e+06	2.79849e+07	5.89786e+07	1.96719	0.778337531486146	3.10651	0.962910128388017	1.13932	0.836994219653179	3.04659	0.888888888888889	4.12213	0.979247730220493	1.07555	0.813197969543147	2.38459	32.0925	63.7892
sp|O88952|LIN7C_MOUSE	Lin7c	sp|O88952|LIN7C_MOUSE;sp|Q8JZS0|LIN7A_MOUSE;sp|O88951|LIN7B_MOUSE	sp|O88952|LIN7C_MOUSE	Protein lin-7 homolog C OS=Mus musculus OX=10090 GN=Lin7c PE=1 SV=2	3	8	54.8	21.834	197	0	260.25	1//0	1//0	1//0	1238900000	11	47			-1;-1;-1	112630000	6413900	10184000	96031000	435930000	177820000	759580000				1.57208e+08	4.51321e+07	4.1239e+08	-1.29368	0.168765743073048	0.801105	0.723252496433666	2.09478	0.953757225433526	-1.80045	0.166666666666667	1.39133	0.778210116731518	3.19178	0.964467005076142	213.604	163.382	824.926
sp|O88958|GNPI1_MOUSE	Gnpda1	sp|O88958|GNPI1_MOUSE	sp|O88958|GNPI1_MOUSE	Glucosamine-6-phosphate isomerase 1 OS=Mus musculus OX=10090 GN=Gnpda1 PE=1 SV=3	1	4	21.8	32.549	289	0	28.805	1//0	0//0	1//0	37866000	15	5			-1	2524400	342960		2181500	23988000			SPL_M		SPL_21358	1.35191e+07		1.60202e+07									0.244893	0.495460440985733			11.4217	0	18.7395
sp|O88967|YMEL1_MOUSE	Yme1l1	sp|O88967|YMEL1_MOUSE	sp|O88967|YMEL1_MOUSE	ATP-dependent zinc metalloprotease YME1L1 OS=Mus musculus OX=10090 GN=Yme1l1 PE=1 SV=1	1	8	18.7	80.027	715	0	72.073	0//0	1//0	0//0	56442000	38	12			-1	1485300		1485300			71920000		SPL_6027		SPL_6027		3.28045e+07														0	23.8287	0
sp|O88986|KBL_MOUSE	Gcat	sp|O88986|KBL_MOUSE	sp|O88986|KBL_MOUSE	2-amino-3-ketobutyrate coenzyme A ligase, mitochondrial OS=Mus musculus OX=10090 GN=Gcat PE=1 SV=2	1	14	50	44.93	416	0	323.31	1//0	1//0	1//0	328110000	17	77			-1	19301000	9414500	8918100	968080	688680000	251570000	15327000				1.7099e+08	4.67174e+07	8.05742e+06	-1.45287	0.152392947103275	-5.48969	0.00998573466476462	-4.03681	0.0728323699421965	-1.87188	0.153935185185185	-4.40745	0.0155642023346304	-2.53557	0.169543147208122	313.534	143.073	8.31601
sp|O89017|LGMN_MOUSE	Lgmn	sp|O89017|LGMN_MOUSE	sp|O89017|LGMN_MOUSE	Legumain OS=Mus musculus OX=10090 GN=Lgmn PE=1 SV=1	1	5	15.6	49.372	435	0	86.299	1//0	1//0	1//0	175690000	17	12			-1	10335000	89034	2594200	7651600	20984000	64940000	88534000				3.97761e+06	3.42755e+07	5.94895e+07	1.62982	0.729219143576826	2.07694	0.927246790299572	0.447124	0.695953757225434	3.1072	0.895833333333333	3.90266	0.976653696498054	0.795455	0.773604060913706	2.96513	41.6188	65.7288
sp|O89023|TPP1_MOUSE	Tpp1	sp|O89023|TPP1_MOUSE	sp|O89023|TPP1_MOUSE	Tripeptidyl-peptidase 1 OS=Mus musculus OX=10090 GN=Tpp1 PE=1 SV=2	1	7	28.3	61.341	562	0	287.3	1//0	1//0	1//0	2257400000	20	70			-1	112870000	1596500	48153000	63121000	201670000	1170200000	1122000000				8.391e+07	5.71349e+08	4.71372e+08	2.53669	0.838790931989924	2.476	0.947218259629101	-0.0606824	0.572254335260116	2.76746	0.862268518518518	2.48995	0.916990920881971	-0.277505	0.56243654822335	53.1688	772.519	542.222
sp|O89050|MKLN1_MOUSE	Mkln1	sp|O89050|MKLN1_MOUSE	sp|O89050|MKLN1_MOUSE	Muskelin OS=Mus musculus OX=10090 GN=Mkln1 PE=1 SV=1	1	14	27.6	84.877	735	0	131.35	1//0	1//0	0//0	151920000	42	25			-1	3617200	188990	3428300		37813000	184910000			SPL_M	SPL_6027	2.08595e+07	6.13576e+07		2.28987	0.814861460957179					1.55654	0.699074074074074					6.294	55.0003	0
sp|O89053|COR1A_MOUSE	Coro1a	sp|O89053|COR1A_MOUSE	sp|O89053|COR1A_MOUSE	Coronin-1A OS=Mus musculus OX=10090 GN=Coro1a PE=1 SV=5	1	30	56.8	50.989	461	0	323.31	1//0	1//0	1//0	19677000000	19	314			-1	1035600000	160180000	104690000	770750000	14123000000	3062400000	11975000000				3.46043e+09	5.82464e+08	3.47816e+09	-2.20531	0.0780856423173804	-0.238021	0.362339514978602	1.96729	0.944508670520231	-2.57071	0.0972222222222222	0.00737294	0.430609597924773	2.57808	0.939086294416244	5334.53	1679.54	6620.9
sp|O89079|COPE_MOUSE	Cope	sp|O89079|COPE_MOUSE	sp|O89079|COPE_MOUSE	Coatomer subunit epsilon OS=Mus musculus OX=10090 GN=Cope PE=1 SV=3	1	10	52.3	34.567	308	0	249.77	1//0	1//0	1//0	281690000	13	35			-1	21668000	534420	14876000	6257400	36437000	227170000	85103000				1.82578e+07	7.91938e+07	3.98269e+07	2.6403	0.846347607052897	1.22381	0.823109843081312	-1.41649	0.298265895953757	2.11687	0.78587962962963	1.12523	0.72632944228275	-0.991644	0.410152284263959	17.798	238.656	53.7524
sp|P00405|COX2_MOUSE	Mtco2	sp|P00405|COX2_MOUSE	sp|P00405|COX2_MOUSE	Cytochrome c oxidase subunit 2 OS=Mus musculus OX=10090 GN=Mtco2 PE=1 SV=1	1	9	56.8	25.976	227	0	311.79	1//0	1//0	1//0	2527700000	6	49			-1	421290000	406650	402770000	18111000	20395000	3123600000	70515000				6.41202e+06	1.49602e+09	5.32019e+07	7.25885	0.992443324937028	1.78971	0.902995720399429	-5.46914	0.0265895953757225	7.86614	0.998842592592593	3.05263	0.955901426718547	-4.81351	0.0304568527918782	13.5428	6461.65	155.577
sp|P00493|HPRT_MOUSE	Hprt1	sp|P00493|HPRT_MOUSE	sp|P00493|HPRT_MOUSE	Hypoxanthine-guanine phosphoribosyltransferase OS=Mus musculus OX=10090 GN=Hprt1 PE=1 SV=3	1	12	69.7	24.57	218	0	134.55	1//0	1//0	1//0	461560000	13	59			-1	35504000	8903400	20040000	6560700	450450000	371470000	129650000				1.70586e+08	1.28769e+08	3.99247e+07	-0.278121	0.379093198992443	-1.79674	0.0912981455064194	-1.51862	0.282080924855491	-0.405718	0.349537037037037	-2.09514	0.0998702983138781	-1.68943	0.279187817258883	296.513	321.502	56.3578
sp|P00688|AMYP_MOUSE	Amy2	sp|P00688|AMYP_MOUSE;sp|P00687|AMY1_MOUSE	sp|P00688|AMYP_MOUSE	Pancreatic alpha-amylase OS=Mus musculus OX=10090 GN=Amy2 PE=1 SV=2	2	22	63.4	57.318	508	0	323.31	1//0	1//0	0//0	1612300000	24	121			-1;-1	67179000	11966000	55213000		1511700000	1521700000			SPL_M	SPL_6027	3.54991e+08	4.45079e+08		0.0095121	0.438287153652393					0.326277	0.474537037037037					398.508	885.783	0
sp|P00761|TRYP_PIG		sp|P00761|TRYP_PIG;CON__sp|P00761|TRYP_PIG	sp|P00761|TRYP_PIG;CON__sp|P00761|TRYP_PIG	Trypsin OS=Sus scrofa PE=1 SV=1;	2	4	25.1	24.409	231	0	323.31	1//0	1//0	1//0	4806600000	12	49		+	-1;-1	400550000	274940000	60252000	65358000	15261000000	945570000	640360000				7.16713e+09	4.74023e+08	3.35926e+08	-4.01252	0.0163727959697733	-4.57482	0.014265335235378	-0.562301	0.461271676300578	-3.91837	0.0231481481481481	-4.41518	0.012970168612192	-0.496814	0.516751269035533	9156.42	966.624	561.439
sp|P00920|CAH2_MOUSE	Ca2	sp|P00920|CAH2_MOUSE	sp|P00920|CAH2_MOUSE	Carbonic anhydrase 2 OS=Mus musculus OX=10090 GN=Ca2 PE=1 SV=4	1	4	34.6	29.032	260	0	35.188	1//0	1//0	1//0	64997000	13	12			-1	4999700	909170	449940	3640600	37440000	18138000	46766000				3.10607e+07	4.54607e+06	2.31714e+07	-1.04557	0.216624685138539	0.32088	0.557774607703281	1.36644	0.868208092485549	-2.7724	0.0752314814814815	-0.422743	0.334630350194553	2.34965	0.926903553299492	30.2784	7.2184	31.2735
sp|P01592|IGJ_MOUSE	Jchain	sp|P01592|IGJ_MOUSE	sp|P01592|IGJ_MOUSE	Immunoglobulin J chain OS=Mus musculus OX=10090 GN=Jchain PE=1 SV=4	1	2	16.4	18.013	159	0.0011249	12.983	1//0	0//0	0//0	6845800	8	2			-1	855730	855730			33336000			SPL_M	SPL_M		1.79908e+07															28.4987	0	0
sp|P01638|KV5A6_MOUSE		sp|P01638|KV5A6_MOUSE;sp|P01637|KV5A5_MOUSE	sp|P01638|KV5A6_MOUSE;sp|P01637|KV5A5_MOUSE	Ig kappa chain V-V region L6 (Fragment) OS=Mus musculus OX=10090 PE=4 SV=1;Ig kappa chain V-V region T1 OS=Mus musculus OX=10090 PE=4 SV=1	2	4	38.3	12.986	115	0	79.471	1//0	1//0	1//0	503970000	4	19			-1;-1	125990000	822270	92511000	32660000	43845000	449490000	91070000				8.6436e+06	2.87602e+08	6.39612e+07	3.3578	0.894206549118388	1.05456	0.796005706134094	-2.30324	0.190751445086705	5.0563	0.978009259259259	2.88749	0.946822308690013	-2.1688	0.210152284263959	27.3843	1484.16	280.556
sp|P01728|LV2A_MOUSE		sp|P01728|LV2A_MOUSE;sp|P01723|LV1A_MOUSE;sp|P01729|LV2B_MOUSE;sp|P01727|LV1E_MOUSE;sp|P01726|LV1D_MOUSE	sp|P01728|LV2A_MOUSE;sp|P01723|LV1A_MOUSE;sp|P01729|LV2B_MOUSE;sp|P01727|LV1E_MOUSE;sp|P01726|LV1D_MOUSE	Ig lambda-2 chain V region OS=Mus musculus OX=10090 PE=3 SV=1;Ig lambda-1 chain V region OS=Mus musculus OX=10090 PE=1 SV=2;Ig lambda-2 chain V region MOPC 315 OS=Mus musculus OX=10090 PE=1 SV=1;Ig lambda-1 chain V region S43 OS=Mus musculus OX=10090 PE=1	5	2	35.9	12.222	117	0.00060496	16.719	1//0	1//0	0//0	26576000	3	4			-1;-1;-1;-1;-1	8858600	3381600	5477000		47349000				SPL_M	SPL_6027	2.66606e+07	1.27703e+07								-1.06192	0.234953703703704					112.619	87.8676	0
sp|P01831|THY1_MOUSE	Thy1	sp|P01831|THY1_MOUSE	sp|P01831|THY1_MOUSE	Thy-1 membrane glycoprotein OS=Mus musculus OX=10090 GN=Thy1 PE=1 SV=1	1	3	22.2	18.08	162	0	37.72	0//0	1//0	0//0	41608000	7	5			-1	5943900		5943900			55767000		SPL_6027		SPL_6027		3.23379e+07														0	95.3581	0
sp|P01837|IGKC_MOUSE	Igkc	sp|P01837|IGKC_MOUSE	sp|P01837|IGKC_MOUSE	Immunoglobulin kappa constant OS=Mus musculus OX=10090 GN=Igkc PE=1 SV=2	1	8	88.8	11.934	107	0	252.58	1//0	1//0	1//0	573480000	4	43			-1	143370000	15048000	122700000	5624300	120210000	765210000	39455000				1.55361e+08	2.94681e+08	1.10145e+07	2.6703	0.847607052896725	-1.60728	0.109843081312411	-4.27758	0.0543352601156069	0.923532	0.578703703703704	-3.81814	0.0285343709468223	-4.74168	0.033502538071066	501.149	1968.48	48.3139
sp|P01843|LAC1_MOUSE		sp|P01843|LAC1_MOUSE	sp|P01843|LAC1_MOUSE	Ig lambda-1 chain C region OS=Mus musculus OX=10090 PE=1 SV=1	1	3	51.4	11.575	105	0	246.48	1//0	1//0	1//0	580450000	5	23			-1	116090000	1609300	11001000	103480000	53561000	87398000	403760000				2.11463e+07	4.27513e+07	2.53315e+08	0.706417	0.594458438287154	2.91424	0.961483594864479	2.20783	0.961849710982659	1.01556	0.604166666666667	3.58245	0.971465629053178	2.56689	0.937055837563452	53.5951	176.489	888.915
sp|P01844|LAC2_MOUSE	Iglc2	sp|P01844|LAC2_MOUSE;sp|P01845|LAC3_MOUSE	sp|P01844|LAC2_MOUSE;sp|P01845|LAC3_MOUSE	Ig lambda-2 chain C region OS=Mus musculus OX=10090 GN=Iglc2 PE=1 SV=1;Ig lambda-3 chain C region OS=Mus musculus OX=10090 GN=Iglc3 PE=1 SV=1	2	4	63.5	11.254	104	0	55.721	1//0	1//0	0//0	82167000	6	18			-1;-1	13695000	12046000	1648600		339040000	11343000			SPL_M	SPL_6027	1.89941e+08	7.68772e+06		-4.90158	0.00503778337531486					-4.62685	0.0138888888888889					401.172	26.4485	0
sp|P01872-2|IGHM_MOUSE	Ighm	sp|P01872-2|IGHM_MOUSE	sp|P01872-2|IGHM_MOUSE	Isoform 2 of Immunoglobulin heavy constant mu OS=Mus musculus OX=10090 GN=Ighm	1	22	47.8	52.526	475	0	323.31	1//0	1//0	1//0	3489200000	21	160			-1	166150000	24284000	90375000	51495000	2465400000	2025200000	1231200000				4.24951e+08	4.33384e+08	2.66216e+08	-0.283757	0.375314861460957	-1.00176	0.198288159771755	-0.717999	0.420809248554913	0.0283486	0.428240740740741	-0.674699	0.282749675745785	-0.703047	0.465989847715736	808.739	1449.89	442.353
sp|P01881|IGHD_MOUSE		sp|P01881|IGHD_MOUSE;sp|P01882|IGHDM_MOUSE	sp|P01881|IGHD_MOUSE;sp|P01882|IGHDM_MOUSE	Ig delta chain C region secreted form OS=Mus musculus OX=10090 PE=1 SV=2;Ig delta chain C region membrane-bound form OS=Mus musculus OX=10090 PE=1 SV=3	2	2	14	28.368	257	0	48.056	0//0	1//0	0//0	43463000	12	4			-1;-1	3622000		3622000			54389000		SPL_6027		SPL_6027		3.37807e+07														0	58.1078	0
sp|P01887|B2MG_MOUSE	B2m	sp|P01887|B2MG_MOUSE	sp|P01887|B2MG_MOUSE	Beta-2-microglobulin OS=Mus musculus OX=10090 GN=B2m PE=1 SV=2	1	6	66.4	13.779	119	0	238.03	1//0	1//0	1//0	10283000000	6	93			-1	1713800000	41232000	851800000	820750000	1370200000	6042800000	4622400000				6.50143e+08	2.9459e+09	2.26937e+09	2.14083	0.799748110831234	1.75426	0.897289586305278	-0.386575	0.501734104046243	2.17988	0.793981481481482	1.80346	0.841763942931258	-0.376417	0.541116751269036	1373.16	13665.4	7050.41
sp|P01898|HA10_MOUSE	H2-Q10	sp|P01898|HA10_MOUSE	sp|P01898|HA10_MOUSE	H-2 class I histocompatibility antigen, Q10 alpha chain OS=Mus musculus OX=10090 GN=H2-Q10 PE=1 SV=3	1	2	17.5	37.251	325	0	24.045	0//1	1//0	0//1	37629000	17	6			-1	2213500		2213500			48928000		SPL_6027		SPL_6027		2.92455e+07														0	35.5112	0
sp|P01899|HA11_MOUSE	H2-D1	sp|P01899|HA11_MOUSE;sp|P14429|HA17_MOUSE;sp|P14431|HA19_MOUSE	sp|P01899|HA11_MOUSE	H-2 class I histocompatibility antigen, D-B alpha chain OS=Mus musculus OX=10090 GN=H2-D1 PE=1 SV=2	3	10	32	40.836	362	0	107.06	1//0	1//0	1//0	395810000	20	33			-1;-1;-1	19791000	755500	7304700	11730000	77530000	160470000	215980000				3.97091e+07	8.41123e+07	1.02252e+08	1.04948	0.658690176322418	1.47807	0.864479315263909	0.428594	0.690173410404624	1.08285	0.614583333333333	1.36458	0.77431906614786	0.281734	0.681218274111675	25.1607	117.189	100.763
sp|P01902|HA1D_MOUSE	H2-K1	sp|P01902|HA1D_MOUSE	sp|P01902|HA1D_MOUSE	H-2 class I histocompatibility antigen, K-D alpha chain OS=Mus musculus OX=10090 GN=H2-K1 PE=1 SV=1	1	7	22	41.489	368	0	54.804	0//1	1//0	0//0	75106000	22	9			-1	3413900		3413900			93770000		SPL_6027		SPL_6027		4.18852e+07														0	54.7693	0
sp|P01942|HBA_MOUSE	Hba	sp|P01942|HBA_MOUSE;sp|P06467|HBAZ_MOUSE	sp|P01942|HBA_MOUSE	Hemoglobin subunit alpha OS=Mus musculus OX=10090 GN=Hba PE=1 SV=2	2	32	100	15.085	142	0	323.31	1//0	1//0	1//0	439130000000	8	2848			-1;-1	54891000000	10214000000	7543100000	37134000000	220110000000	114740000000	327750000000				1.6165e+11	2.49075e+10	8.58494e+10	-0.939856	0.231738035264484	0.574371	0.6490727532097	1.51423	0.897109826589595	-2.69822	0.0833333333333333	-0.912993	0.243839169909209	1.78523	0.881218274111675	340160	121014	318989
sp|P02088|HBB1_MOUSE	Hbb-b1	sp|P02088|HBB1_MOUSE;sp|P02104|HBE_MOUSE	sp|P02088|HBB1_MOUSE	Hemoglobin subunit beta-1 OS=Mus musculus OX=10090 GN=Hbb-b1 PE=1 SV=2	2	19	97.3	15.84	147	0	323.31	1//0	1//0	1//0	178000000000	11	638			-1;-1	16182000000	432720000	714680000	15034000000	24420000000	10427000000	132840000000				8.76771e+09	4.02855e+09	4.40598e+10	-1.22774	0.185138539042821	2.44355	0.942938659058488	3.67129	0.991907514450867	-1.12194	0.231481481481481	2.32919	0.90272373540856	3.45113	0.976649746192893	14411	11465.6	129145
sp|P02089|HBB2_MOUSE	Hbb-b2	sp|P02089|HBB2_MOUSE	sp|P02089|HBB2_MOUSE	Hemoglobin subunit beta-2 OS=Mus musculus OX=10090 GN=Hbb-b2 PE=1 SV=2	1	31	97.3	15.878	147	0	323.31	1//0	1//0	1//0	230040000000	11	692			-1	20913000000	554740000	941780000	19417000000	20245000000	11848000000	183300000000				9.39562e+09	4.97219e+09	4.02634e+10	-0.772922	0.26448362720403	3.17857	0.965763195435093	3.95149	0.994219653179191	-0.918107	0.263888888888889	2.09941	0.8715953307393	3.01751	0.959390862944162	18474.7	15109	166796
sp|P02533|K1C14_HUMAN	KRT14	sp|P02533|K1C14_HUMAN;CON__sp|P02533|K1C14_HUMAN;sp|Q04695|K1C17_HUMAN;CON__sp|Q04695|K1C17_HUMAN;sp|Q9QWL7|K1C17_MOUSE;sp|Q61414|K1C15_MOUSE;sp|P08779|K1C16_HUMAN;CON__sp|P08779|K1C16_HUMAN;sp|Q61781|K1C14_MOUSE;sp|P08727|K1C19_HUMAN;CON__sp|P08727|K1C19_HUMAN;sp|P19001|K1C19_MOUSE;sp|P19012|K1C15_HUMAN;CON__sp|P19012|K1C15_HUMAN;sp|Q6IFX2|K1C42_MOUSE	sp|P02533|K1C14_HUMAN;CON__sp|P02533|K1C14_HUMAN;sp|Q04695|K1C17_HUMAN;CON__sp|Q04695|K1C17_HUMAN;sp|Q9QWL7|K1C17_MOUSE;sp|Q61414|K1C15_MOUSE;sp|P08779|K1C16_HUMAN;CON__sp|P08779|K1C16_HUMAN;sp|Q61781|K1C14_MOUSE	Keratin, type I cytoskeletal 14 OS=Homo sapiens GN=KRT14 PE=1 SV=4;;Keratin, type I cytoskeletal 17 OS=Homo sapiens GN=KRT17 PE=1 SV=2;;Keratin, type I cytoskeletal 17 OS=Mus musculus OX=10090 GN=Krt17 PE=1 SV=3;Keratin, type I cytoskeletal 15 OS=Mus muscu	15	3	11.2	51.561	472	0	20.879	0//1	1//0	0//0	16899000	30	5		+	-1;-1;-1;-1;-1;-1;-1;-1;-1;-1;-1;-1;-1;-1;-1	563310		563310			21021000		SPL_6027		SPL_6027		1.31345e+07														0	9.03719	0
sp|P02798|MT2_MOUSE	Mt2	sp|P02798|MT2_MOUSE	sp|P02798|MT2_MOUSE	Metallothionein-2 OS=Mus musculus OX=10090 GN=Mt2 PE=1 SV=2	1	2	21.3	6.1153	61	0	18.66	1//0	1//0	1//0	59795000	3	10			-1	19932000	8684300	612630	10635000	105430000	4175000	38714000				6.84665e+07	1.42846e+06	1.56199e+07	-4.65837	0.00755667506297229	-1.44536	0.128388017118402	3.21301	0.98728323699422	-5.58286	0.00462962962962963	-2.13202	0.0959792477302205	3.45085	0.975634517766497	289.216	9.82843	91.3568
sp|P04184|KITH_MOUSE	Tk1	sp|P04184|KITH_MOUSE	sp|P04184|KITH_MOUSE	Thymidine kinase, cytosolic OS=Mus musculus OX=10090 GN=Tk1 PE=1 SV=3	1	4	22.3	25.776	233	0	37.787	1//0	0//0	1//0	46115000	12	5			-1	3842900	272270		3570600	19548000		32476000	SPL_M		SPL_21358	8.58628e+06		2.09778e+07			0.732353	0.700427960057061					1.28876	0.761348897535668			9.0675	0	30.6722
sp|P04223-2|HA1K_MOUSE	H2-K1	sp|P04223-2|HA1K_MOUSE;sp|P04223|HA1K_MOUSE	sp|P04223-2|HA1K_MOUSE;sp|P04223|HA1K_MOUSE	Isoform 2 of H-2 class I histocompatibility antigen, K-K alpha chain OS=Mus musculus OX=10090 GN=H2-K1;H-2 class I histocompatibility antigen, K-K alpha chain OS=Mus musculus OX=10090 GN=H2-K1 PE=1 SV=1	2	4	23.1	40.63	360	0	38.299	0//1	1//0	1//0	83099000	18	9			-1;-1	4616600		3853000	763660		85195000		SPL_6027	SPL_21358			5.39028e+07	6.72998e+06											-3.00169	0.115736040609137	0	61.8137	6.56
sp|P04228|HA2D_MOUSE	H2-Aa	sp|P04228|HA2D_MOUSE;sp|P14435|HA2F_MOUSE;sp|P14437|HA2S_MOUSE;sp|P14436|HA2R_MOUSE;sp|P23150|HA2J_MOUSE;sp|P01910|HA2K_MOUSE;sp|P04227|HA2Q_MOUSE	sp|P04228|HA2D_MOUSE;sp|P14435|HA2F_MOUSE;sp|P14437|HA2S_MOUSE;sp|P14436|HA2R_MOUSE;sp|P23150|HA2J_MOUSE;sp|P01910|HA2K_MOUSE	H-2 class II histocompatibility antigen, A-D alpha chain OS=Mus musculus OX=10090 GN=H2-Aa PE=1 SV=1;H-2 class II histocompatibility antigen, A-F alpha chain OS=Mus musculus OX=10090 GN=H2-Aa PE=1 SV=1;H-2 class II histocompatibility antigen, A-S alpha cha	7	3	29.3	28.243	256	0	39.107	1//0	1//0	0//0	72369000	7	8			-1;-1;-1;-1;-1;-1;-1	10338000	90485	10248000		15568000	77027000			SPL_M	SPL_6027	1.66454e+06	5.57535e+07		2.30678	0.818639798488665					5.06587	0.979166666666667					3.01345	164.409	0
sp|P04264|K2C1_HUMAN	KRT1	sp|P04264|K2C1_HUMAN;CON__sp|P04264|K2C1_HUMAN	sp|P04264|K2C1_HUMAN;CON__sp|P04264|K2C1_HUMAN	Keratin, type II cytoskeletal 1 OS=Homo sapiens GN=KRT1 PE=1 SV=6;	2	36	55.3	66.038	644	0	323.31	1//0	1//0	1//0	3218700000	31	176		+	-1;-1	103830000	1379800	68010000	34439000	291730000	2452400000	1074300000				6.90569e+07	4.0788e+08	2.95155e+08	3.07149	0.874055415617129	1.88069	0.907275320970043	-1.1908	0.33757225433526	2.56229	0.84375	2.09562	0.869001297016861	-0.466672	0.523857868020305	45.952	1091.09	295.838
sp|P04441-2|HG2A_MOUSE	Cd74	sp|P04441-2|HG2A_MOUSE;sp|P04441|HG2A_MOUSE	sp|P04441-2|HG2A_MOUSE;sp|P04441|HG2A_MOUSE	Isoform Short of H-2 class II histocompatibility antigen gamma chain OS=Mus musculus OX=10090 GN=Cd74;H-2 class II histocompatibility antigen gamma chain OS=Mus musculus OX=10090 GN=Cd74 PE=1 SV=3	2	13	75.3	24.454	215	0	252.7	1//0	1//0	1//0	573420000	13	46			-1;-1	44110000	2548500	38597000	2964200	177660000	619330000	67656000				7.56245e+07	2.13026e+08	1.88657e+07	1.80159	0.755667506297229	-1.39283	0.135520684736091	-3.19442	0.119075144508671	1.4941	0.68287037037037	-2.00309	0.108949416342412	-3.49719	0.083248730964467	84.8736	619.212	25.4631
sp|P04919-2|B3AT_MOUSE	Slc4a1	sp|P04919-2|B3AT_MOUSE;sp|P04919|B3AT_MOUSE	sp|P04919-2|B3AT_MOUSE;sp|P04919|B3AT_MOUSE	Isoform 2 of Band 3 anion transport protein OS=Mus musculus OX=10090 GN=Slc4a1;Band 3 anion transport protein OS=Mus musculus OX=10090 GN=Slc4a1 PE=1 SV=1	2	27	41.1	94.233	850	0	323.31	1//0	1//0	1//0	6832300000	30	161			-1;-1	227740000	1153900	219160000	7425700	183870000	8511900000	182690000				7.81686e+07	1.97059e+09	1.02683e+08	5.53272	0.973551637279597	-0.00928844	0.430813124108417	-5.54201	0.0254335260115607	4.65589	0.966435185185185	0.393536	0.551232166018158	-4.26236	0.0467005076142132	38.4287	3515.99	63.7883
sp|P05064|ALDOA_MOUSE	Aldoa	sp|P05064|ALDOA_MOUSE	sp|P05064|ALDOA_MOUSE	Fructose-bisphosphate aldolase A OS=Mus musculus OX=10090 GN=Aldoa PE=1 SV=2	1	8	26.6	39.355	364	0	76.465	1//0	1//0	1//0	773210000	22	31			-1	35146000	1138600	2919700	31087000	170650000	96964000	514900000				5.88741e+07	4.72824e+07	2.81137e+08	-0.815519	0.254408060453401	1.59325	0.8830242510699	2.40877	0.973410404624277	-0.316329	0.368055555555556	2.25557	0.888456549935149	2.5719	0.938071065989848	37.9192	46.8408	267.044
sp|P05208|CEL2A_MOUSE	Cela2a	sp|P05208|CEL2A_MOUSE	sp|P05208|CEL2A_MOUSE	Chymotrypsin-like elastase family member 2A OS=Mus musculus OX=10090 GN=Cela2a PE=1 SV=1	1	11	74.5	28.913	271	0	214.19	1//0	1//0	0//0	289060000	13	41			-1	22236000	21829000	406760		1313900000	11306000			SPL_M	SPL_6027	4.45063e+08	4.10982e+06		-6.86062	0.00125944584382872					-6.75879	0.00115740740740741					726.979	6.52566	0
sp|P05213|TBA1B_MOUSE	Tuba1b	sp|P05213|TBA1B_MOUSE	sp|P05213|TBA1B_MOUSE	Tubulin alpha-1B chain OS=Mus musculus OX=10090 GN=Tuba1b PE=1 SV=2	1	44	83.1	50.151	451	0	323.31	1//0	1//0	1//0	16632000000	21	374			-1	792010000	26867000	589330000	175810000	2894200000	14693000000	4220500000				7.40606e+08	3.5684e+09	9.16112e+08	2.34389	0.822418136020151	0.544249	0.639087018544936	-1.79964	0.239306358381503	2.2685	0.800925925925926	0.306819	0.525291828793774	-1.96168	0.23248730964467	894.761	9454.63	1510.24
sp|P05977-2|MYL1_MOUSE	Myl1	sp|P05977-2|MYL1_MOUSE;sp|P05977|MYL1_MOUSE;sp|P02602|MYL1_RABIT;CON__sp|P02602|MYL1_RABIT;sp|P09542|MYL3_MOUSE	sp|P05977-2|MYL1_MOUSE;sp|P05977|MYL1_MOUSE;sp|P02602|MYL1_RABIT;CON__sp|P02602|MYL1_RABIT;sp|P09542|MYL3_MOUSE	Isoform MLC3 of Myosin light chain 1/3, skeletal muscle isoform OS=Mus musculus OX=10090 GN=Myl1;Myosin light chain 1/3, skeletal muscle isoform OS=Mus musculus OX=10090 GN=Myl1 PE=1 SV=2;Myosin light chain 1/3, skeletal muscle isoform OS=Oryctolagus cunic	5	2	10.7	16.6	150	0	22.527	1//0	1//0	1//0	424760000	10	12		+	-1;-1;-1;-1;-1	42476000	2283900	36306000	3886000	106060000	437350000	58104000				6.00211e+07	2.82179e+08	1.90257e+07	2.04391	0.789672544080604	-0.868171	0.218259629101284	-2.91208	0.132947976878613	2.23307	0.795138888888889	-1.65752	0.154345006485084	-3.89059	0.0588832487309645	76.0615	582.458	33.3815
sp|P06151|LDHA_MOUSE	Ldha	sp|P06151|LDHA_MOUSE;sp|P00342|LDHC_MOUSE	sp|P06151|LDHA_MOUSE	L-lactate dehydrogenase A chain OS=Mus musculus OX=10090 GN=Ldha PE=1 SV=3	2	34	91.3	36.498	332	0	323.31	1//0	1//0	1//0	43157000000	18	433			-1;-1	2397600000	70969000	117570000	2209100000	8016100000	3346700000	30243000000				1.41329e+09	4.70568e+08	8.5857e+09	-1.26016	0.177581863979849	1.91563	0.914407988587732	3.17579	0.986127167630058	-1.58658	0.179398148148148	2.60288	0.927367055771725	4.18946	0.989847715736041	2363.51	1886.18	18976.6
sp|P06342|HB2Q_MOUSE	H2-Ab1	sp|P06342|HB2Q_MOUSE;sp|P01921|HB2D_MOUSE	sp|P06342|HB2Q_MOUSE;sp|P01921|HB2D_MOUSE	H-2 class II histocompatibility antigen, A-Q beta chain OS=Mus musculus OX=10090 GN=H2-Ab1 PE=1 SV=1;H-2 class II histocompatibility antigen, A-D beta chain OS=Mus musculus OX=10090 GN=H2-Ab1 PE=1 SV=1	2	3	21.9	29.95	265	0	20.272	0//0	1//0	1//0	86759000	15	8			-1;-1	5783900		4243500	1540400		79676000		SPL_6027	SPL_21358			4.94716e+07	1.13129e+07											-2.12863	0.214213197969543	0	68.0785	13.2324
sp|P06344|HB2U_MOUSE		sp|P06344|HB2U_MOUSE;sp|P06346|HB2F_MOUSE;sp|P06345|HB2S_MOUSE;sp|P06343|HB2K_MOUSE;sp|P14483|HB2A_MOUSE	sp|P06344|HB2U_MOUSE;sp|P06346|HB2F_MOUSE;sp|P06345|HB2S_MOUSE	H-2 class II histocompatibility antigen, A-U beta chain OS=Mus musculus OX=10090 PE=1 SV=1;H-2 class II histocompatibility antigen, A-F beta chain (Fragment) OS=Mus musculus OX=10090 GN=H2-Ab1 PE=1 SV=1;H-2 class II histocompatibility antigen, A-S beta cha	5	9	37.6	30.041	263	0	92.956	1//0	1//0	0//0	373730000	14	35			-1;-1;-1;-1;-1	26695000	40933	26654000		7279600	483150000			SPL_M	SPL_6027	1.50599e+06	1.44705e+08		6.05247	0.979848866498741					6.58625	0.993055555555556					1.36321	427.611	0
sp|P06728|APOA4_MOUSE	Apoa4	sp|P06728|APOA4_MOUSE	sp|P06728|APOA4_MOUSE	Apolipoprotein A-IV OS=Mus musculus OX=10090 GN=Apoa4 PE=1 SV=3	1	11	38	45.029	395	0	117.84	0//0	1//0	1//0	215970000	23	31			-1	9389800		9111800	278020		270620000	4726800	SPL_6027	SPL_21358			8.76216e+07	3.13072e+06					-5.83926	0.0208092485549133					-4.80672	0.0314720812182741	0	146.181	2.38825
sp|P07091|S10A4_MOUSE	S100a4	sp|P07091|S10A4_MOUSE	sp|P07091|S10A4_MOUSE	Protein S100-A4 OS=Mus musculus OX=10090 GN=S100a4 PE=1 SV=1	1	2	24.8	11.721	101	0	20.506	1//0	1//0	1//0	255190000	5	11			-1	51039000	1189300	11404000	38445000	82613000	70850000	111970000				1.56273e+07	4.43167e+07	9.41127e+07	-0.221601	0.395465994962217	0.438672	0.599144079885877	0.660272	0.742196531791907	1.50378	0.685185185185185	2.59032	0.926070038910506	1.08654	0.815228426395939	39.6077	182.955	330.25
sp|P07146|TRY2_MOUSE	Prss2	sp|P07146|TRY2_MOUSE	sp|P07146|TRY2_MOUSE	Anionic trypsin-2 OS=Mus musculus OX=10090 GN=Prss2 PE=1 SV=1	1	2	11.4	26.203	246	0.0011848	15.33	1//0	0//0	0//0	21341000	6	5			-1	3556800	3556800			98277000			SPL_M	SPL_M		5.60828e+07															118.453	0	0
sp|P07356|ANXA2_MOUSE	Anxa2	sp|P07356|ANXA2_MOUSE	sp|P07356|ANXA2_MOUSE	Annexin A2 OS=Mus musculus OX=10090 GN=Anxa2 PE=1 SV=2	1	10	31.6	38.676	339	0	115.88	1//0	1//0	0//0	104760000	21	34			-1	4988700	3100200	1888500		285930000	66495000			SPL_M	SPL_6027	1.02869e+08	2.3776e+07		-2.10434	0.0843828715365239					-2.11323	0.135416666666667					103.247	30.2972	0
sp|P07724|ALBU_MOUSE	Alb	sp|P07724|ALBU_MOUSE	sp|P07724|ALBU_MOUSE	Albumin OS=Mus musculus OX=10090 GN=Alb PE=1 SV=3	1	34	70.9	68.692	608	0	323.31	1//0	1//0	1//0	3369900000	38	246			-1	88683000	14829000	28401000	45452000	2567500000	1319200000	1568400000				4.30164e+08	2.09438e+08	3.17388e+08	-0.960701	0.230478589420655	-0.711071	0.248216833095578	0.24963	0.646242774566474	-1.03836	0.243055555555556	-0.438638	0.330739299610895	0.599722	0.738071065989848	493.855	455.638	390.442
sp|P07742|RIR1_MOUSE	Rrm1	sp|P07742|RIR1_MOUSE	sp|P07742|RIR1_MOUSE	Ribonucleoside-diphosphate reductase large subunit OS=Mus musculus OX=10090 GN=Rrm1 PE=1 SV=2	1	3	4.9	90.209	792	0	24.088	0//0	0//0	1//0	55670000	42	7			-1	1325500			1325500			45425000		SPL_21358	SPL_21358			2.7256e+07													0	0	11.3863
sp|P07759|SPA3K_MOUSE	Serpina3k	sp|P07759|SPA3K_MOUSE;sp|P29621|SPA3C_MOUSE;sp|Q91WP6|SPA3N_MOUSE;sp|Q03734|SPA3M_MOUSE;sp|Q5I2A0|SPA3G_MOUSE;sp|Q80X76|SPA3F_MOUSE	sp|P07759|SPA3K_MOUSE;sp|P29621|SPA3C_MOUSE;sp|Q91WP6|SPA3N_MOUSE;sp|Q03734|SPA3M_MOUSE;sp|Q5I2A0|SPA3G_MOUSE	Serine protease inhibitor A3K OS=Mus musculus OX=10090 GN=Serpina3k PE=1 SV=2;Serine protease inhibitor A3C OS=Mus musculus OX=10090 GN=Serpina3c PE=2 SV=1;Serine protease inhibitor A3N OS=Mus musculus OX=10090 GN=Serpina3n PE=1 SV=1;Serine protease inhibi	6	3	6.9	46.879	418	0	22.984	1//0	1//0	0//0	41252000	19	6			-1;-1;-1;-1;-1;-1	2171200	275780	1895400		34452000	37692000			SPL_M	SPL_6027	1.37701e+07	2.79891e+07		0.129671	0.462216624685139					1.02333	0.605324074074074					9.1844	30.4079	0
sp|P07901|HS90A_MOUSE	Hsp90aa1	sp|P07901|HS90A_MOUSE	sp|P07901|HS90A_MOUSE	Heat shock protein HSP 90-alpha OS=Mus musculus OX=10090 GN=Hsp90aa1 PE=1 SV=4	1	11	32.9	84.787	733	0	123.78	1//0	1//0	1//0	251300000	34	25			-1	7391200	241160	6306500	843570	44352000	271210000					2.15482e+07	1.10046e+08	1.40422e+07	2.61234	0.842569269521411					2.35247	0.815972222222222	-0.617797	0.291828793774319	-2.97026	0.119796954314721	8.03144	101.175	7.24644
sp|P08032|SPTA1_MOUSE	Spta1	sp|P08032|SPTA1_MOUSE	sp|P08032|SPTA1_MOUSE	Spectrin alpha chain, erythrocytic 1 OS=Mus musculus OX=10090 GN=Spta1 PE=1 SV=3	1	46	27.5	279.86	2415	0	323.31	1//0	1//0	1//0	953300000	137	152			-1	6958400	1025200	1095800	4837500	533920000	213000000	654880000				8.19808e+07	3.01624e+07	1.47816e+08	-1.32577	0.163727959697733	0.294607	0.550641940085592	1.62038	0.909826589595376	-1.44253	0.196759259259259	0.850447	0.665369649805447	2.29298	0.922842639593909	34.1426	17.5799	41.5551
sp|P08113|ENPL_MOUSE	Hsp90b1	sp|P08113|ENPL_MOUSE	sp|P08113|ENPL_MOUSE	Endoplasmin OS=Mus musculus OX=10090 GN=Hsp90b1 PE=1 SV=2	1	12	22.2	92.475	802	0	112.61	1//0	1//0	1//0	152160000	39	24			-1	3901500	248140	2743800	909520	57679000	102890000	45184000				2.54321e+07	4.24401e+07	1.73665e+07	0.834985	0.620906801007557	-0.352234	0.328102710413695	-1.18722	0.339884393063584	0.738781	0.547453703703704	-0.550338	0.304798962386511	-1.28912	0.345177664974619	8.26389	44.0188	7.81296
sp|P08207|S10AA_MOUSE	S100a10	sp|P08207|S10AA_MOUSE	sp|P08207|S10AA_MOUSE	Protein S100-A10 OS=Mus musculus OX=10090 GN=S100a10 PE=1 SV=2	1	4	49.5	11.186	97	0	48.03	0//0	1//0	1//0	151240000	4	16			-1	37809000		18478000	19331000		80741000	82131000	SPL_6027	SPL_21358			5.74466e+07	3.78559e+07					0.0246254	0.589595375722543					-0.601704	0.490355329949239	0	296.443	166.057
sp|P08226|APOE_MOUSE	Apoe	sp|P08226|APOE_MOUSE	sp|P08226|APOE_MOUSE	Apolipoprotein E OS=Mus musculus OX=10090 GN=Apoe PE=1 SV=2	1	7	28	35.866	311	0	63.002	0//0	1//0	0//0	147290000	15	14			-1	9819500		9819500			186930000		SPL_6027		SPL_6027		8.54769e+07														0	157.534	0
sp|P08508|FCGR3_MOUSE	Fcgr3	sp|P08508|FCGR3_MOUSE;sp|P08101-2|FCGR2_MOUSE;sp|P08101-3|FCGR2_MOUSE;sp|P08101|FCGR2_MOUSE	sp|P08508|FCGR3_MOUSE	Low affinity immunoglobulin gamma Fc region receptor III OS=Mus musculus OX=10090 GN=Fcgr3 PE=1 SV=1	4	5	21.5	30.036	261	0	101.68	0//0	1//0	0//0	143980000	13	11			-1;-1;-1;-1	11075000		11075000			179090000		SPL_6027		SPL_6027		1.06063e+08														0	177.676	0
sp|P08556|RASN_MOUSE	Nras	sp|P08556|RASN_MOUSE;sp|Q61411-2|RASH_MOUSE;sp|P32883-2|RASK_MOUSE;sp|Q61411|RASH_MOUSE;sp|P32883|RASK_MOUSE	sp|P08556|RASN_MOUSE;sp|Q61411-2|RASH_MOUSE;sp|P32883-2|RASK_MOUSE;sp|Q61411|RASH_MOUSE;sp|P32883|RASK_MOUSE	GTPase NRas OS=Mus musculus OX=10090 GN=Nras PE=1 SV=1;Isoform 2 of GTPase HRas OS=Mus musculus OX=10090 GN=Hras;Isoform 2B of GTPase KRas OS=Mus musculus OX=10090 GN=Kras;GTPase HRas OS=Mus musculus OX=10090 GN=Hras PE=1 SV=2;GTPase KRas OS=Mus musculus O	5	2	10.6	21.199	189	0.0021786	11.992	0//0	1//0	0//0	12646000	10	4			-1;-1;-1;-1;-1	1264600		1264600			16317000		SPL_6027		SPL_6027		9.82829e+06														0	20.288	0
sp|P08680|HEM0_MOUSE	Alas2	sp|P08680|HEM0_MOUSE	sp|P08680|HEM0_MOUSE	5-aminolevulinate synthase, erythroid-specific, mitochondrial OS=Mus musculus OX=10090 GN=Alas2 PE=1 SV=3	1	16	40.2	64.753	587	0	136.52	1//0	1//0	1//0	516480000	29	62			-1	17810000	8996700	3277100	5535900	1062600000	174480000	231550000				3.37763e+08	5.02862e+07	7.62906e+07	-2.60647	0.0541561712846348	-2.1982	0.0627674750356633	0.408262	0.682080924855491	-2.74778	0.0787037037037037	-2.14643	0.0946822308690013	0.601343	0.739086294416244	299.62	52.5746	47.5545
sp|P08752|GNAI2_MOUSE	Gnai2	sp|P08752|GNAI2_MOUSE;sp|B2RSH2|GNAI1_MOUSE;sp|P18872-2|GNAO_MOUSE;sp|P18872|GNAO_MOUSE;sp|P20612|GNAT1_MOUSE;sp|Q3V3I2|GNAT3_MOUSE;sp|P50149|GNAT2_MOUSE;sp|Q8CGK7|GNAL_MOUSE	sp|P08752|GNAI2_MOUSE	Guanine nucleotide-binding protein G(i) subunit alpha-2 OS=Mus musculus OX=10090 GN=Gnai2 PE=1 SV=5	8	16	54.6	40.489	355	0	323.31	1//0	1//0	1//0	701390000	17	64			-1;-1;-1;-1;-1;-1;-1;-1	41258000	544090	38980000	1734200	33639000	840150000	46712000				2.43075e+07	1.9043e+08	1.44338e+07	4.64244	0.95088161209068	0.473658	0.613409415121255	-4.16878	0.0624277456647399	2.96979	0.883101851851852	-0.751957	0.268482490272374	-3.72174	0.0700507614213198	18.12	625.357	14.8971
sp|P09055|ITB1_MOUSE	Itgb1	sp|P09055|ITB1_MOUSE;sp|P09055-2|ITB1_MOUSE	sp|P09055|ITB1_MOUSE;sp|P09055-2|ITB1_MOUSE	Integrin beta-1 OS=Mus musculus OX=10090 GN=Itgb1 PE=1 SV=1;Isoform 2 of Integrin beta-1 OS=Mus musculus OX=10090 GN=Itgb1	2	2	4.9	88.231	798	0	39.274	0//0	1//0	0//0	21603000	34	4			-1;-1	635400		635400			28048000		SPL_6027		SPL_6027		1.67904e+07														0	10.1937	0
sp|P09103|PDIA1_MOUSE	P4hb	sp|P09103|PDIA1_MOUSE	sp|P09103|PDIA1_MOUSE	Protein disulfide-isomerase OS=Mus musculus OX=10090 GN=P4hb PE=1 SV=2	1	10	21.2	57.058	509	0	127.29	0//0	1//0	1//0	99354000	33	14			-1	3010700		2510600	500120		109550000		SPL_6027	SPL_21358			3.64696e+07	8.08028e+06											-2.17422	0.209137055837563	0	40.2776	4.29613
sp|P09528|FRIH_MOUSE	Fth1	sp|P09528|FRIH_MOUSE	sp|P09528|FRIH_MOUSE	Ferritin heavy chain OS=Mus musculus OX=10090 GN=Fth1 PE=1 SV=2	1	10	64.8	21.066	182	0	268.62	1//0	1//0	1//0	1354700000	11	68			-1	123150000	5033100	30757000	87365000	302620000	400550000	809950000				1.03477e+08	1.57154e+08	4.47134e+08	0.404475	0.520151133501259	1.42033	0.860199714693295	1.01585	0.815028901734104	0.602865	0.513888888888889	2.11139	0.872892347600519	1.50853	0.861928934010152	167.619	493.435	750.483
sp|P09581|CSF1R_MOUSE	Csf1r	sp|P09581|CSF1R_MOUSE	sp|P09581|CSF1R_MOUSE	Macrophage colony-stimulating factor 1 receptor OS=Mus musculus OX=10090 GN=Csf1r PE=1 SV=3	1	3	5.3	109.18	977	0	38.682	0//0	1//0	0//0	16563000	32	5			-1	517600		517600			19729000		SPL_6027		SPL_6027		1.2873e+07														0	8.30387	0
sp|P09813|APOA2_MOUSE	Apoa2	sp|P09813|APOA2_MOUSE	sp|P09813|APOA2_MOUSE	Apolipoprotein A-II OS=Mus musculus OX=10090 GN=Apoa2 PE=1 SV=2	1	2	14.7	11.309	102	0.0011682	14.631	1//0	1//0	0//0	67476000	5	5			-1	13495000	4492500	9002700		114350000	49233000			SPL_M	SPL_6027	5.90316e+07	3.49854e+07		-1.21576	0.187657430730479					-0.754734	0.28587962962963					149.615	144.43	0
sp|P0C0A3|CHMP6_MOUSE	Chmp6	sp|P0C0A3|CHMP6_MOUSE	sp|P0C0A3|CHMP6_MOUSE	Charged multivesicular body protein 6 OS=Mus musculus OX=10090 GN=Chmp6 PE=1 SV=2	1	2	12.5	23.415	200	0	36.752	0//0	1//0	0//0	20983000	8	3			-1	2622900		2622900			26291000		SPL_6027		SPL_6027		1.63085e+07														0	42.0792	0
sp|P0CW03|LY6C2_MOUSE	Ly6c2	sp|P0CW03|LY6C2_MOUSE;sp|P0CW02|LY6C1_MOUSE	sp|P0CW03|LY6C2_MOUSE;sp|P0CW02|LY6C1_MOUSE	Lymphocyte antigen 6C2 OS=Mus musculus OX=10090 GN=Ly6c2 PE=1 SV=1;Lymphocyte antigen 6C1 OS=Mus musculus OX=10090 GN=Ly6c1 PE=2 SV=1	2	4	30.5	14.09	131	0	109.5	0//0	1//0	0//0	103840000	5	9			-1;-1	20767000		20767000			131810000		SPL_6027		SPL_6027		6.74576e+07														0	333.165	0
sp|P0DN34|NDUB1_MOUSE	Ndufb1	sp|P0DN34|NDUB1_MOUSE	sp|P0DN34|NDUB1_MOUSE	NADH dehydrogenase [ubiquinone] 1 beta subcomplex subunit 1 OS=Mus musculus OX=10090 GN=Ndufb1 PE=1 SV=1	1	2	75.4	6.954	57	0	37.382	0//0	1//0	0//0	89286000	3	11			-1	29762000		29762000			114140000		SPL_6027		SPL_6027		6.93939e+07														0	477.472	0
sp|P10107|ANXA1_MOUSE	Anxa1	sp|P10107|ANXA1_MOUSE	sp|P10107|ANXA1_MOUSE	Annexin A1 OS=Mus musculus OX=10090 GN=Anxa1 PE=1 SV=2	1	11	42.2	38.734	346	0	323.31	1//0	1//0	1//0	827400000	21	85			-1	39400000	7118700	5011600	27270000	591200000	165800000	559590000				2.28299e+08	4.57182e+07	1.80131e+08	-1.8342	0.109571788413098	-0.0792761	0.407988587731812	1.75493	0.92485549132948	-2.32008	0.116898148148148	-0.341881	0.343709468223087	1.9782	0.894416243654822	237.077	80.4012	234.255
sp|P10126|EF1A1_MOUSE	Eef1a1	sp|P10126|EF1A1_MOUSE;sp|P62631|EF1A2_MOUSE	sp|P10126|EF1A1_MOUSE	Elongation factor 1-alpha 1 OS=Mus musculus OX=10090 GN=Eef1a1 PE=1 SV=3	2	27	68	50.113	462	0	323.31	1//0	1//0	1//0	17686000000	19	293			-1;-1	930860000	112430000	155560000	662870000	9819600000	3482500000	11084000000				2.92009e+09	1.09332e+09	2.96601e+09	-1.49554	0.149874055415617	0.174742	0.485021398002853	1.67028	0.914450867052023	-1.4173	0.197916666666667	0.0225105	0.431906614785992	1.43981	0.849746192893401	3744.3	2495.65	5694.19
sp|P10417-2|BCL2_MOUSE	Bcl2	sp|P10417-2|BCL2_MOUSE;sp|P10417|BCL2_MOUSE	sp|P10417-2|BCL2_MOUSE;sp|P10417|BCL2_MOUSE	Isoform Beta of Apoptosis regulator Bcl-2 OS=Mus musculus OX=10090 GN=Bcl2;Apoptosis regulator Bcl-2 OS=Mus musculus OX=10090 GN=Bcl2 PE=1 SV=3	2	2	22.1	22.281	199	0.0011799	15.207	0//0	1//0	0//0	34901000	8	5			-1;-1	4362600		4362600			45315000		SPL_6027		SPL_6027		2.71258e+07														0	69.9893	0
sp|P10518|HEM2_MOUSE	Alad	sp|P10518|HEM2_MOUSE	sp|P10518|HEM2_MOUSE	Delta-aminolevulinic acid dehydratase OS=Mus musculus OX=10090 GN=Alad PE=1 SV=1	1	23	90.3	36.023	330	0	323.31	1//0	1//0	1//0	5431400000	14	201			-1	387960000	84716000	59111000	244130000	4940200000	1045800000	3466500000				1.6481e+09	2.78028e+08	9.36039e+08	-2.23996	0.0768261964735516	-0.51109	0.289586305278174	1.72887	0.920231213872832	-2.56751	0.099537037037037	-0.816166	0.259403372243839	1.75134	0.880203045685279	2821.33	948.319	2097.13
sp|P10605|CATB_MOUSE	Ctsb	sp|P10605|CATB_MOUSE	sp|P10605|CATB_MOUSE	Cathepsin B OS=Mus musculus OX=10090 GN=Ctsb PE=1 SV=2	1	10	45.7	37.279	339	0	323.31	1//0	1//0	1//0	658520000	15	61			-1	43901000	4545200	22420000	16936000	334510000	339860000	294990000				1.06067e+08	1.58112e+08	1.15008e+08	0.0228912	0.443324937027708	-0.181383	0.380884450784593	-0.204275	0.546820809248555	0.575967	0.508101851851852	0.11675	0.456549935149157	-0.459218	0.525888324873096	151.37	359.684	145.484
sp|P10639|THIO_MOUSE	Txn	sp|P10639|THIO_MOUSE	sp|P10639|THIO_MOUSE	Thioredoxin OS=Mus musculus OX=10090 GN=Txn PE=1 SV=3	1	7	66.7	11.675	105	0	84.344	1//0	1//0	1//0	405050000	7	38			-1	57865000	20491000	21896000	15478000	626200000	181090000	156320000				3.02777e+08	9.68128e+07	5.30455e+07	-1.78992	0.114609571788413	-2.00212	0.0756062767475036	-0.212205	0.543352601156069	-1.64499	0.175925925925926	-2.51295	0.0700389105058366	-0.867966	0.43248730964467	682.419	351.278	132.959
sp|P10649|GSTM1_MOUSE	Gstm1	sp|P10649|GSTM1_MOUSE;sp|Q8R5I6|GSTM4_MOUSE;sp|Q80W21|GSTM7_MOUSE;sp|P15626|GSTM2_MOUSE	sp|P10649|GSTM1_MOUSE	Glutathione S-transferase Mu 1 OS=Mus musculus OX=10090 GN=Gstm1 PE=1 SV=2	4	5	28	25.97	218	0	35.265	1//0	1//0	1//0	221400000	17	11			-1;-1;-1;-1	13024000	616510	702350	11705000		17424000	168240000				2.75434e+07	9.27999e+06	9.74202e+07					3.27137	0.989595375722543	-1.56951	0.18287037037037	1.82252	0.845654993514916	3.39203	0.971573604060914	20.5318	11.2678	100.548
sp|P10852|4F2_MOUSE	Slc3a2	sp|P10852|4F2_MOUSE;sp|P10852-2|4F2_MOUSE	sp|P10852|4F2_MOUSE;sp|P10852-2|4F2_MOUSE	4F2 cell-surface antigen heavy chain OS=Mus musculus OX=10090 GN=Slc3a2 PE=1 SV=1;Isoform 2 of 4F2 cell-surface antigen heavy chain OS=Mus musculus OX=10090 GN=Slc3a2	2	19	44.1	58.336	526	0	323.31	1//0	1//0	1//0	725670000	27	54			-1;-1	26877000	59117	26371000	446140	4988100	907390000	5669400				4.19463e+06	1.8543e+08	5.89752e+06	7.50709	0.994962216624685	0.184706	0.489300998573466	-7.32238	0.00346820809248555	5.46618	0.981481481481482	0.491564	0.588845654993515	-4.97462	0.0263959390862944	1.96879	423.07	3.83243
sp|P10922|H10_MOUSE	H1-0	sp|P10922|H10_MOUSE	sp|P10922|H10_MOUSE	Histone H1.0 OS=Mus musculus OX=10090 GN=H1-0 PE=2 SV=4	1	3	18.6	20.861	194	0	22.348	1//0	1//0	1//0	62770000	6	15			-1	10462000	3042900	2056600	5362200	76936000	19001000	30520000				4.79796e+07	9.59033e+06	1.57518e+07	-2.01758	0.0906801007556675	-1.3339	0.144079885877318	0.68368	0.75028901734104	-2.32277	0.115740740740741	-1.60691	0.158236057068742	0.71586	0.755329949238579	101.339	32.9941	46.0624
sp|P11103|PARP1_MOUSE	Parp1	sp|P11103|PARP1_MOUSE;sp|P11103-2|PARP1_MOUSE	sp|P11103|PARP1_MOUSE;sp|P11103-2|PARP1_MOUSE	Poly [ADP-ribose] polymerase 1 OS=Mus musculus OX=10090 GN=Parp1 PE=1 SV=3;Isoform 2 of Poly [ADP-ribose] polymerase 1 OS=Mus musculus OX=10090 GN=Parp1	2	2	2.8	113.1	1013	0.001137	13.553	1//0	0//0	0//0	9245100	49	2			-1;-1	188670	188670			43828000			SPL_M	SPL_M		2.4296e+07															6.28334	0	0
sp|P11152|LIPL_MOUSE	Lpl	sp|P11152|LIPL_MOUSE	sp|P11152|LIPL_MOUSE	Lipoprotein lipase OS=Mus musculus OX=10090 GN=Lpl PE=1 SV=3	1	3	11.2	53.109	474	0	19.995	1//0	1//0	0//0	4990300	20	2			-1	249510	26323	223190			5407700			SPL_M	SPL_6027	1.3835e+06	3.46932e+06								1.32633	0.650462962962963					0.876644	3.58064	0
sp|P11352|GPX1_MOUSE	Gpx1	sp|P11352|GPX1_MOUSE	sp|P11352|GPX1_MOUSE	Glutathione peroxidase 1 OS=Mus musculus OX=10090 GN=Gpx1 PE=1 SV=2	1	7	50.7	22.329	201	0	87.834	1//0	1//0	1//0	482160000	13	44			-1	37090000	3400800	7071100	26618000	172320000	115910000	338750000				9.10986e+07	4.40992e+07	1.23667e+08	-0.572085	0.31360201511335	0.975131	0.778887303851641	1.54722	0.900578034682081	-1.04668	0.239583333333333	0.440959	0.575875486381323	1.48764	0.85989847715736	113.258	113.442	228.654
sp|P11440|CDK1_MOUSE	Cdk1	sp|P11440|CDK1_MOUSE;sp|Q99J95-3|CDK9_MOUSE;sp|Q04735-2|CDK16_MOUSE;sp|Q14AX6|CDK12_MOUSE;sp|Q14AX6-3|CDK12_MOUSE;sp|Q69ZA1-2|CDK13_MOUSE;sp|Q14AX6-2|CDK12_MOUSE;sp|Q8K0D0|CDK17_MOUSE;sp|Q04735|CDK16_MOUSE;sp|O35495|CDK14_MOUSE;sp|Q04899|CDK18_MOUSE;sp|P49615|CDK5_MOUSE;sp|Q3V3A1|CDK15_MOUSE;sp|Q3V3A1-3|CDK15_MOUSE;sp|Q8K0D0-2|CDK17_MOUSE;sp|O35495-2|CDK14_MOUSE;sp|Q99J95|CDK9_MOUSE;sp|O35495-3|C…	sp|P11440|CDK1_MOUSE	Cyclin-dependent kinase 1 OS=Mus musculus OX=10090 GN=Cdk1 PE=1 SV=3	20	6	28.3	34.106	297	0	57.858	1//0	1//0	1//0	348230000	19	26			-1;-1;-1;-1;-1;-1;-1;-1;-1;-1;-1;-1;-1;-1;-1;-1;-1;-1;-1;-1	18328000	1768500	1839900	14720000	164600000	87500000	188930000				8.18219e+07	2.71701e+07	1.04872e+08	-0.911609	0.236775818639798	0.198887	0.504992867332382	1.1105	0.830057803468208	-1.59047	0.178240740740741	0.358068	0.544747081712062	1.94854	0.891370558375635	58.897	29.5175	126.448
sp|P11499|HS90B_MOUSE	Hsp90ab1	sp|P11499|HS90B_MOUSE	sp|P11499|HS90B_MOUSE	Heat shock protein HSP 90-beta OS=Mus musculus OX=10090 GN=Hsp90ab1 PE=1 SV=3	1	32	47.4	83.28	724	0	323.31	1//0	1//0	1//0	2448000000	35	163			-1	69942000	5710300	29153000	35078000	970010000	1074900000	1185900000				1.83376e+08	1.94845e+08	2.81149e+08	0.148131	0.469773299748111	0.289911	0.547788873038516	0.14178	0.620809248554913	0.0875267	0.438657407407407	0.616533	0.61348897535668	0.529006	0.719796954314721	190.172	467.702	301.327
sp|P11679|K2C8_MOUSE	Krt8	sp|P11679|K2C8_MOUSE;sp|P05787|K2C8_HUMAN;CON__sp|P05787|K2C8_HUMAN	sp|P11679|K2C8_MOUSE;sp|P05787|K2C8_HUMAN;CON__sp|P05787|K2C8_HUMAN	Keratin, type II cytoskeletal 8 OS=Mus musculus OX=10090 GN=Krt8 PE=1 SV=4;Keratin, type II cytoskeletal 8 OS=Homo sapiens GN=KRT8 PE=1 SV=7;	3	2	8.4	54.565	490	0.0011074	12.51	0//1	1//0	0//1	9205200	30	1		+	-1;-1;-1	306840		306840			10918000		SPL_6027		SPL_6027		7.1544e+06														0	4.92264	0
sp|P11835|ITB2_MOUSE	Itgb2	sp|P11835|ITB2_MOUSE	sp|P11835|ITB2_MOUSE	Integrin beta-2 OS=Mus musculus OX=10090 GN=Itgb2 PE=1 SV=2	1	28	47.5	85.025	771	0	323.31	1//0	1//0	1//0	755800000	47	77			-1	16081000	21884	15741000	318180	7606200	946170000	12939000				2.70301e+06	1.21534e+08	7.32156e+06	6.95878	0.991183879093199	0.766478	0.711840228245364	-6.1923	0.015028901734104	5.49064	0.982638888888889	1.43758	0.787289234760052	-4.05306	0.0527918781725888	0.72881	252.533	2.73323
sp|P11881-8|ITPR1_MOUSE	Itpr1	sp|P11881-8|ITPR1_MOUSE;sp|P11881-7|ITPR1_MOUSE;sp|P11881-6|ITPR1_MOUSE;sp|P11881-5|ITPR1_MOUSE;sp|P11881-4|ITPR1_MOUSE;sp|P11881-2|ITPR1_MOUSE;sp|P11881-3|ITPR1_MOUSE;sp|P11881|ITPR1_MOUSE	sp|P11881-8|ITPR1_MOUSE;sp|P11881-7|ITPR1_MOUSE;sp|P11881-6|ITPR1_MOUSE;sp|P11881-5|ITPR1_MOUSE;sp|P11881-4|ITPR1_MOUSE;sp|P11881-2|ITPR1_MOUSE;sp|P11881-3|ITPR1_MOUSE;sp|P11881|ITPR1_MOUSE	Isoform 8 of Inositol 1,4,5-trisphosphate receptor type 1 OS=Mus musculus OX=10090 GN=Itpr1;Isoform 7 of Inositol 1,4,5-trisphosphate receptor type 1 OS=Mus musculus OX=10090 GN=Itpr1;Isoform 6 of Inositol 1,4,5-trisphosphate receptor type 1 OS=Mus musculu	8	4	2.6	306.86	2694	0	26.448	0//0	1//0	1//0	209260000	136	9			-1;-1;-1;-1;-1;-1;-1;-1	1538700		124510	1414200		21673000		SPL_6027	SPL_21358			1.31604e+07	9.41634e+07											2.83896	0.948223350253807	0	1.99752	12.1483
sp|P11911|CD79A_MOUSE	Cd79a	sp|P11911|CD79A_MOUSE	sp|P11911|CD79A_MOUSE	B-cell antigen receptor complex-associated protein alpha chain OS=Mus musculus OX=10090 GN=Cd79a PE=1 SV=2	1	5	27.7	24.583	220	0	34.452	0//0	1//0	0//0	109490000	9	9			-1	12165000		12165000			145690000		SPL_6027		SPL_6027		7.80599e+07														0	195.163	0
sp|P11928|OAS1A_MOUSE	Oas1a	sp|P11928|OAS1A_MOUSE	sp|P11928|OAS1A_MOUSE	2-5-oligoadenylate synthase 1A OS=Mus musculus OX=10090 GN=Oas1a PE=1 SV=2	1	2	5.4	42.428	367	0.0011772	15.138	0//0	1//0	1//0	12817000	15	4			-1	854470		325590	528890		6706900		SPL_6027	SPL_21358			3.79575e+06	3.88411e+06											0.0331983	0.63248730964467	0	5.22345	4.54327
sp|P11983|TCPA_MOUSE	Tcp1	sp|P11983|TCPA_MOUSE;sp|P11983-2|TCPA_MOUSE	sp|P11983|TCPA_MOUSE;sp|P11983-2|TCPA_MOUSE	T-complex protein 1 subunit alpha OS=Mus musculus OX=10090 GN=Tcp1 PE=1 SV=3;Isoform 2 of T-complex protein 1 subunit alpha OS=Mus musculus OX=10090 GN=Tcp1	2	24	54.3	60.448	556	0	323.31	1//0	1//0	1//0	1160100000	31	128			-1;-1	37421000	2340700	12166000	22914000	410500000	406750000	610150000				9.05069e+07	8.18109e+07	1.99493e+08	-0.0132399	0.429471032745592	0.571782	0.646219686162625	0.585022	0.723699421965318	-0.145735	0.399305555555556	1.14024	0.728923476005188	1.28598	0.836548223350254	77.9531	195.179	196.836
sp|P12367|KAP2_MOUSE	Prkar2a	sp|P12367|KAP2_MOUSE	sp|P12367|KAP2_MOUSE	cAMP-dependent protein kinase type II-alpha regulatory subunit OS=Mus musculus OX=10090 GN=Prkar2a PE=1 SV=2	1	2	6.7	45.389	401	0.00059988	16.127	0//0	1//0	0//0	11456000	19	2			-1	602920		602920			15082000		SPL_6027		SPL_6027		8.90328e+06														0	9.67266	0
sp|P12399|CTL2A_MOUSE	Ctla2a	sp|P12399|CTL2A_MOUSE	sp|P12399|CTL2A_MOUSE	Protein CTLA-2-alpha OS=Mus musculus OX=10090 GN=Ctla2a PE=2 SV=2	1	2	19.7	15.883	137	0.002168	11.847	1//0	0//0	0//0	7890500	8	5			-1	986310	986310			36007000			SPL_M	SPL_M		2.0736e+07															32.8474	0	0
sp|P12787|COX5A_MOUSE	Cox5a	sp|P12787|COX5A_MOUSE	sp|P12787|COX5A_MOUSE	Cytochrome c oxidase subunit 5A, mitochondrial OS=Mus musculus OX=10090 GN=Cox5a PE=1 SV=2	1	12	63	16.101	146	0	300.9	1//0	1//0	1//0	4268800000	9	98			-1	474320000	19240000	402070000	53008000	881250000	4452500000	492170000				3.51885e+08	1.73834e+09	2.3357e+08	2.33699	0.821158690176322	-0.840395	0.221112696148359	-3.17739	0.121387283236994	2.30453	0.806712962962963	-0.591248	0.297016861219196	-2.89578	0.134010152284264	640.756	6450.42	455.35
sp|P12815|PDCD6_MOUSE	Pdcd6	sp|P12815|PDCD6_MOUSE;sp|P12815-2|PDCD6_MOUSE	sp|P12815|PDCD6_MOUSE;sp|P12815-2|PDCD6_MOUSE	Programmed cell death protein 6 OS=Mus musculus OX=10090 GN=Pdcd6 PE=1 SV=2;Isoform 2 of Programmed cell death protein 6 OS=Mus musculus OX=10090 GN=Pdcd6	2	17	80.1	21.867	191	0	323.31	1//0	1//0	0//0	1306800000	9	61			-1;-1	145200000	1520700	143680000		87384000	1663700000			SPL_M	SPL_6027	3.38006e+07	4.38657e+08		4.25088	0.933249370277078					3.69797	0.917824074074074					50.6444	2305.06	0
sp|P12970|RL7A_MOUSE	Rpl7a	sp|P12970|RL7A_MOUSE	sp|P12970|RL7A_MOUSE	60S ribosomal protein L7a OS=Mus musculus OX=10090 GN=Rpl7a PE=1 SV=2	1	16	55.3	29.976	266	0	199.54	1//0	1//0	1//0	714960000	11	51			-1	64997000	16492000	44505000	3999900	1009900000	458170000	42292000				3.26895e+08	1.7202e+08	2.15417e+07	-1.14026	0.204030226700252	-4.57768	0.0128388017118402	-3.43743	0.10635838150289	-0.926248	0.260416666666667	-3.92362	0.0246433203631647	-2.99738	0.117766497461929	549.239	713.994	34.36
sp|P13020-2|GELS_MOUSE	Gsn	sp|P13020-2|GELS_MOUSE;sp|P13020|GELS_MOUSE	sp|P13020-2|GELS_MOUSE;sp|P13020|GELS_MOUSE	Isoform 2 of Gelsolin OS=Mus musculus OX=10090 GN=Gsn;Gelsolin OS=Mus musculus OX=10090 GN=Gsn PE=1 SV=3	2	26	57.9	80.762	731	0	323.31	1//0	1//0	1//0	1697100000	30	117			-1;-1	56568000	3203400	24326000	29039000	563420000	750160000	808840000				9.66066e+07	1.66002e+08	2.61978e+08	0.412988	0.521410579345088	0.521644	0.627674750356633	0.108656	0.610404624277457	0.781009	0.554398148148148	1.43925	0.78988326848249	0.658244	0.749238578680203	106.684	390.262	249.451
sp|P13439|UMPS_MOUSE	Umps	sp|P13439|UMPS_MOUSE	sp|P13439|UMPS_MOUSE	Uridine 5-monophosphate synthase OS=Mus musculus OX=10090 GN=Umps PE=1 SV=3	1	8	26.8	52.292	481	0	78.585	0//0	1//0	0//0	63571000	26	14			-1	2445000		2445000			82117000		SPL_6027		SPL_6027		3.15177e+07														0	39.2252	0
sp|P14069|S10A6_MOUSE	S100a6	sp|P14069|S10A6_MOUSE	sp|P14069|S10A6_MOUSE	Protein S100-A6 OS=Mus musculus OX=10090 GN=S100a6 PE=1 SV=3	1	6	78.7	10.051	89	0	174.31	1//0	1//0	1//0	582330000	5	23			-1	116470000	4571400	48300000	63594000	110760000	243780000	328870000				6.00676e+07	1.49288e+08	1.55677e+08	1.13814	0.670025188916877	1.57008	0.881597717546362	0.431938	0.692485549132948	1.31344	0.646990740740741	1.37389	0.775616083009079	0.0604528	0.63756345177665	152.243	774.878	546.286
sp|P14094|AT1B1_MOUSE	Atp1b1	sp|P14094|AT1B1_MOUSE	sp|P14094|AT1B1_MOUSE	Sodium/potassium-transporting ATPase subunit beta-1 OS=Mus musculus OX=10090 GN=Atp1b1 PE=1 SV=1	1	2	8.2	35.194	304	0.0011587	14.329	0//0	1//0	0//0	24822000	15	6			-1	1654800		1654800			31597000		SPL_6027		SPL_6027		1.92917e+07														0	26.548	0
sp|P14115|RL27A_MOUSE	Rpl27a	sp|P14115|RL27A_MOUSE	sp|P14115|RL27A_MOUSE	60S ribosomal protein L27a OS=Mus musculus OX=10090 GN=Rpl27a PE=1 SV=5	1	5	28.4	16.605	148	0	105.24	1//0	1//0	1//0	952740000	7	41			-1	136110000	25697000	66448000	43960000	787080000	577800000	336330000				3.88637e+08	2.92263e+08	1.45796e+08	-0.44594	0.345088161209068	-1.22663	0.156918687589158	-0.780693	0.406936416184971	-0.411154	0.347222222222222	-1.41448	0.186770428015564	-1.00332	0.408121827411168	855.796	1066.03	377.625
sp|P14131|RS16_MOUSE	Rps16	sp|P14131|RS16_MOUSE	sp|P14131|RS16_MOUSE	40S ribosomal protein S16 OS=Mus musculus OX=10090 GN=Rps16 PE=1 SV=4	1	8	45.2	16.445	146	0	75.718	1//0	1//0	1//0	1473500000	11	59			-1	133950000	27160000	56923000	49869000	1437000000	634740000	582210000				6.51206e+08	3.3325e+08	2.68571e+08	-1.17882	0.193954659949622	-1.30345	0.148359486447932	-0.124626	0.558381502890173	-0.966507	0.253472222222222	-1.27781	0.202334630350195	-0.311303	0.554314720812183	904.519	913.217	428.385
sp|P14148|RL7_MOUSE	Rpl7	sp|P14148|RL7_MOUSE	sp|P14148|RL7_MOUSE	60S ribosomal protein L7 OS=Mus musculus OX=10090 GN=Rpl7 PE=1 SV=2	1	9	28.9	31.419	270	0	102.33	1//0	1//0	1//0	388420000	13	36			-1	29878000	2867100	24202000	2808800	177050000	387760000	32294000				9.79506e+07	1.61646e+08	1.78774e+07	1.13101	0.668765743073048	-2.45482	0.0470756062767475	-3.58583	0.0971098265895954	0.72271	0.542824074074074	-2.45392	0.072632944228275	-3.17663	0.108629441624365	95.484	388.273	24.1282
sp|P14152|MDHC_MOUSE	Mdh1	sp|P14152|MDHC_MOUSE	sp|P14152|MDHC_MOUSE	Malate dehydrogenase, cytoplasmic OS=Mus musculus OX=10090 GN=Mdh1 PE=1 SV=3	1	2	8.7	36.511	334	0.00062267	18.31	0//0	0//0	1//0	0	14	4			-1	0								SPL_21358	SPL_21358			0													0	0	0
sp|P14206|RSSA_MOUSE	Rpsa	sp|P14206|RSSA_MOUSE	sp|P14206|RSSA_MOUSE	40S ribosomal protein SA OS=Mus musculus OX=10090 GN=Rpsa PE=1 SV=4	1	19	65.4	32.838	295	0	323.31	1//0	1//0	1//0	11190000000	13	186			-1	860740000	92598000	198840000	569300000	5473700000	3524500000	6170300000				1.71506e+09	1.01306e+09	2.24442e+09	-0.635098	0.299748110831234	0.172824	0.483594864479315	0.807922	0.778034682080925	-0.759534	0.284722222222222	0.388083	0.549935149156939	1.14762	0.823350253807107	3083.82	3189.99	4890.4
sp|P14211|CALR_MOUSE	Calr	sp|P14211|CALR_MOUSE	sp|P14211|CALR_MOUSE	Calreticulin OS=Mus musculus OX=10090 GN=Calr PE=1 SV=1	1	3	8.7	47.994	416	0	23.794	0//0	1//0	1//0	76591000	22	4			-1	3481400		1455800	2025700		40320000	36431000	SPL_6027	SPL_21358			2.48913e+07	2.18188e+07					-0.146329	0.55606936416185					-0.190069	0.581725888324873	0	23.3554	17.4012
sp|P14438|HA2U_MOUSE	H2-Aa	sp|P14438|HA2U_MOUSE;sp|P14434|HA2B_MOUSE	sp|P14438|HA2U_MOUSE;sp|P14434|HA2B_MOUSE	H-2 class II histocompatibility antigen, A-U alpha chain (Fragment) OS=Mus musculus OX=10090 GN=H2-Aa PE=1 SV=1;H-2 class II histocompatibility antigen, A-B alpha chain OS=Mus musculus OX=10090 GN=H2-Aa PE=1 SV=2	2	6	31.7	25.135	227	0	129.08	0//0	1//0	0//0	140080000	8	17			-1;-1	17509000		17509000			176070000		SPL_6027		SPL_6027		8.00973e+07														0	280.897	0
sp|P14439|HA23_MOUSE	H2-Ea	sp|P14439|HA23_MOUSE;sp|P04224|HA22_MOUSE;sp|P01904|HA21_MOUSE	sp|P14439|HA23_MOUSE;sp|P04224|HA22_MOUSE	H-2 class II histocompatibility antigen, E-U alpha chain OS=Mus musculus OX=10090 GN=H2-Ea PE=2 SV=2;H-2 class II histocompatibility antigen, E-K alpha chain OS=Mus musculus OX=10090 PE=1 SV=1	3	5	34.1	29.107	255	0	94.381	0//0	1//0	0//0	54188000	14	13			-1;-1;-1	3870600		3870600			67227000		SPL_6027		SPL_6027		3.04868e+07														0	62.0961	0
sp|P14576|SRP54_MOUSE	Srp54	sp|P14576|SRP54_MOUSE	sp|P14576|SRP54_MOUSE	Signal recognition particle 54 kDa protein OS=Mus musculus OX=10090 GN=Srp54 PE=1 SV=2	1	2	5.4	55.72	504	0.0022002	12.305	0//0	1//0	0//0	18126000	30	1			-1	604200		604200			22295000		SPL_6027		SPL_6027		1.40877e+07														0	9.69319	0
sp|P14602|HSPB1_MOUSE	Hspb1	sp|P14602|HSPB1_MOUSE;sp|P14602-2|HSPB1_MOUSE;sp|P14602-3|HSPB1_MOUSE	sp|P14602|HSPB1_MOUSE;sp|P14602-2|HSPB1_MOUSE;sp|P14602-3|HSPB1_MOUSE	Heat shock protein beta-1 OS=Mus musculus OX=10090 GN=Hspb1 PE=1 SV=3;Isoform B of Heat shock protein beta-1 OS=Mus musculus OX=10090 GN=Hspb1;Isoform C of Heat shock protein beta-1 OS=Mus musculus OX=10090 GN=Hspb1	3	17	90.4	23.014	209	0	323.31	1//0	1//0	1//0	968520000	12	97			-1;-1;-1	80710000	16814000	45934000	17962000	863110000	710550000	255930000				3.10308e+08	2.00987e+08	8.9838e+07	-0.280608	0.376574307304786	-1.7538	0.094151212553495	-1.47319	0.292485549132948	-0.6266	0.311342592592593	-1.7883	0.142671854734112	-1.1617	0.366497461928934	559.963	736.92	154.297
sp|P14685|PSMD3_MOUSE	Psmd3	sp|P14685|PSMD3_MOUSE	sp|P14685|PSMD3_MOUSE	26S proteasome non-ATPase regulatory subunit 3 OS=Mus musculus OX=10090 GN=Psmd3 PE=1 SV=3	1	23	49.4	60.718	530	0	323.31	1//0	1//0	1//0	741310000	34	87			-1	21803000	762100	13162000	7879300	131690000	538420000	240460000				5.49675e+07	1.46589e+08	8.7809e+07	2.03159	0.788413098236776	0.868651	0.748930099857347	-1.16294	0.344508670520231	1.41513	0.671296296296296	0.675792	0.626459143968872	-0.739338	0.456852791878173	25.3805	211.158	67.6848
sp|P14733|LMNB1_MOUSE	Lmnb1	sp|P14733|LMNB1_MOUSE	sp|P14733|LMNB1_MOUSE	Lamin-B1 OS=Mus musculus OX=10090 GN=Lmnb1 PE=1 SV=3	1	13	28.2	66.785	588	0	90.383	0//0	1//0	0//0	119340000	36	12			-1	3315100		3315100			150490000		SPL_6027		SPL_6027		3.81387e+07														0	53.1842	0
sp|P14869|RLA0_MOUSE	Rplp0	sp|P14869|RLA0_MOUSE	sp|P14869|RLA0_MOUSE	60S acidic ribosomal protein P0 OS=Mus musculus OX=10090 GN=Rplp0 PE=1 SV=3	1	15	54.6	34.216	317	0	290.97	1//0	1//0	1//0	1772300000	13	84			-1	136330000	14839000	102090000	19406000	951030000	1592500000	282610000				3.79892e+08	6.26729e+08	1.23514e+08	0.743731	0.600755667506297	-1.75068	0.0970042796005706	-2.49441	0.166473988439306	0.722253	0.541666666666667	-1.62091	0.156939040207523	-2.34316	0.192893401015228	494.188	1637.83	166.702
sp|P14901|HMOX1_MOUSE	Hmox1	sp|P14901|HMOX1_MOUSE	sp|P14901|HMOX1_MOUSE	Heme oxygenase 1 OS=Mus musculus OX=10090 GN=Hmox1 PE=1 SV=1	1	25	88.9	32.928	289	0	323.31	1//0	1//0	1//0	3130700000	12	120			-1	260890000	1863700	259030000		113140000	4010400000					4.52814e+07	1.01008e+09	0	5.14757	0.96095717884131					4.4794	0.956018518518518					62.0675	4155.62	0
sp|P15105|GLNA_MOUSE	Glul	sp|P15105|GLNA_MOUSE	sp|P15105|GLNA_MOUSE	Glutamine synthetase OS=Mus musculus OX=10090 GN=Glul PE=1 SV=6	1	19	55.2	42.119	373	0	323.31	1//0	1//0	1//0	7774000000	15	150			-1	518270000	77564000	63687000	377020000	5909600000	1373600000	4163200000				1.37617e+09	4.71116e+08	1.82243e+09	-2.1051	0.0831234256926952	-0.505368	0.291012838801712	1.59973	0.907514450867052	-1.5465	0.186342592592593	0.405206	0.560311284046693	1.95171	0.892385786802031	2583.14	1021.73	3238.68
sp|P15307|REL_MOUSE	Rel	sp|P15307|REL_MOUSE	sp|P15307|REL_MOUSE	Proto-oncogene c-Rel OS=Mus musculus OX=10090 GN=Rel PE=1 SV=2	1	9	17.4	64.959	587	0	61.968	1//0	1//0	1//0	126310000	21	19			-1	6014900	93400	4450900	1470600		112680000	32578000				5.1545e+06	4.1335e+07	1.51196e+07					-1.79026	0.240462427745665	3.00346	0.885416666666667	1.55251	0.808041504539559	-1.45094	0.320812182741117	3.11053	71.4059	12.6328
sp|P15508|SPTB1_MOUSE	Sptb	sp|P15508|SPTB1_MOUSE	sp|P15508|SPTB1_MOUSE	Spectrin beta chain, erythrocytic OS=Mus musculus OX=10090 GN=Sptb PE=1 SV=4	1	39	23.7	245.25	2128	0	323.31	1//0	1//0	1//0	486710000	128	100			-1	3802400	628330	506410	2667700	336340000	108310000	303180000				7.1873e+07	2.04861e+07	5.57297e+07	-1.63475	0.141057934508816	-0.149746	0.383737517831669	1.48501	0.892485549132948	-1.8108	0.163194444444444	-0.367005	0.339818417639429	1.4438	0.850761421319797	20.9255	8.12434	22.9161
sp|P15530|CD79B_MOUSE	Cd79b	sp|P15530|CD79B_MOUSE	sp|P15530|CD79B_MOUSE	B-cell antigen receptor complex-associated protein beta chain OS=Mus musculus OX=10090 GN=Cd79b PE=1 SV=1	1	3	11	25.726	228	0	21.484	0//0	1//0	0//0	32315000	7	6			-1	4616400		4616400			40373000		SPL_6027		SPL_6027		2.51155e+07														0	74.061	0
sp|P15532|NDKA_MOUSE	Nme1	sp|P15532|NDKA_MOUSE	sp|P15532|NDKA_MOUSE	Nucleoside diphosphate kinase A OS=Mus musculus OX=10090 GN=Nme1 PE=1 SV=1	1	7	53.3	17.208	152	0	73.499	0//0	1//0	0//0	187590000	11	18			-1	17054000		17054000			236940000		SPL_6027		SPL_6027		1.10424e+08														0	273.598	0
sp|P15864|H12_MOUSE	H1-2	sp|P15864|H12_MOUSE;sp|Q07133|H1T_MOUSE	sp|P15864|H12_MOUSE	Histone H1.2 OS=Mus musculus OX=10090 GN=H1-2 PE=1 SV=2	2	2	34.9	21.266	212	0	21.939	1//0	1//0	1//0	96261000	10	8			-1;-1	9626100	2595000	4262700	2768400	127700000	37838000	29872000				6.81962e+07	3.31301e+07	1.35545e+07	-1.75485	0.118387909319899	-2.09589	0.0684736091298146	-0.341042	0.507514450867052	-1.04155	0.241898148148148	-2.33093	0.0778210116731518	-1.28937	0.344162436548223	86.4222	68.3866	23.7811
sp|P16045|LEG1_MOUSE	Lgals1	sp|P16045|LEG1_MOUSE	sp|P16045|LEG1_MOUSE	Galectin-1 OS=Mus musculus OX=10090 GN=Lgals1 PE=1 SV=3	1	2	22.2	14.866	135	0	19.427	1//0	0//0	0//0	7826100	9	3			-1	869570	869570			36545000			SPL_M	SPL_M		2.05669e+07															28.9596	0	0
sp|P16125|LDHB_MOUSE	Ldhb	sp|P16125|LDHB_MOUSE	sp|P16125|LDHB_MOUSE	L-lactate dehydrogenase B chain OS=Mus musculus OX=10090 GN=Ldhb PE=1 SV=2	1	11	40.1	36.572	334	0	153.06	1//0	1//0	1//0	1158700000	17	55			-1	68160000	9073100	3652900	55434000	741940000	176360000	684330000				2.49379e+08	4.15697e+07	2.99919e+08	-2.07278	0.0894206549118388	-0.11661	0.395149786019971	1.95617	0.942196531791908	-2.58473	0.09375	0.266234	0.512321660181582	2.85097	0.951269035532995	302.165	58.6035	476.19
sp|P16330-2|CN37_MOUSE	Cnp	sp|P16330-2|CN37_MOUSE;sp|P16330|CN37_MOUSE	sp|P16330-2|CN37_MOUSE;sp|P16330|CN37_MOUSE	Isoform CNPI of 2,3-cyclic-nucleotide 3-phosphodiesterase OS=Mus musculus OX=10090 GN=Cnp;2,3-cyclic-nucleotide 3-phosphodiesterase OS=Mus musculus OX=10090 GN=Cnp PE=1 SV=3	2	7	22	44.654	400	0	87.907	1//0	1//0	1//0	85003000	24	13			-1;-1	3541800	179490	2018600	1343700	26210000	32207000	46297000				1.13211e+07	2.87748e+07	1.57892e+07	0.297257	0.502518891687657	0.820801	0.730385164051355	0.523544	0.712138728323699	1.34579	0.652777777777778	0.479921	0.5810635538262	-0.865872	0.433502538071066	5.97762	32.3844	11.5427
sp|P16546-2|SPTN1_MOUSE	Sptan1	sp|P16546-2|SPTN1_MOUSE;sp|P16546|SPTN1_MOUSE	sp|P16546-2|SPTN1_MOUSE;sp|P16546|SPTN1_MOUSE	Isoform 2 of Spectrin alpha chain, non-erythrocytic 1 OS=Mus musculus OX=10090 GN=Sptan1;Spectrin alpha chain, non-erythrocytic 1 OS=Mus musculus OX=10090 GN=Sptan1 PE=1 SV=4	2	8	4.5	282.34	2452	0	59.422	0//0	1//0	1//0	65858000	141	10			-1;-1	467080		210860	256220		17900000	50159000	SPL_6027	SPL_21358			1.90419e+07	1.76875e+07					1.48655	0.89364161849711					-0.106453	0.602030456852792	0	3.38283	2.20098
sp|P16675|PPGB_MOUSE	Ctsa	sp|P16675|PPGB_MOUSE	sp|P16675|PPGB_MOUSE	Lysosomal protective protein OS=Mus musculus OX=10090 GN=Ctsa PE=1 SV=1	1	7	17.7	53.844	474	0	81.875	0//0	1//0	1//0	249780000	20	18			-1	12489000		4491500	7997600		123800000	132110000	SPL_6027	SPL_21358			6.75084e+07	7.8312e+07					0.0937284	0.606936416184971					0.214165	0.67005076142132	0	72.0572	68.701
sp|P16858|G3P_MOUSE	Gapdh	sp|P16858|G3P_MOUSE;sp|Q64467|G3PT_MOUSE	sp|P16858|G3P_MOUSE	Glyceraldehyde-3-phosphate dehydrogenase OS=Mus musculus OX=10090 GN=Gapdh PE=1 SV=2	2	19	69.4	35.81	333	0	323.31	1//0	1//0	1//0	9203600000	16	202			-1;-1	575230000	80446000	73298000	421480000	5311900000	1395700000	6492100000				1.2686e+09	3.68521e+08	1.57066e+09	-1.92824	0.102015113350126	0.289457	0.546362339514979	2.2177	0.963005780346821	-1.78342	0.167824074074074	0.308129	0.526588845654994	2.09155	0.908629441624365	2679.12	1175.92	3620.6
sp|P17182|ENOA_MOUSE	Eno1	sp|P17182|ENOA_MOUSE;sp|P21550|ENOB_MOUSE;sp|P17183|ENOG_MOUSE	sp|P17182|ENOA_MOUSE	Alpha-enolase OS=Mus musculus OX=10090 GN=Eno1 PE=1 SV=3	3	17	57.8	47.14	434	0	323.31	1//0	1//0	1//0	844880000	22	88			-1;-1;-1	38404000	10427000	7447300	20530000	810820000	269820000	555810000				2.73036e+08	6.63209e+07	1.48535e+08	-1.58738	0.143576826196474	-0.54479	0.281027104136947	1.04259	0.820809248554913	-2.04156	0.145833333333333	-0.878287	0.251621271076524	1.16327	0.824365482233503	347.254	119.477	176.357
sp|P17225|PTBP1_MOUSE	Ptbp1	sp|P17225|PTBP1_MOUSE	sp|P17225|PTBP1_MOUSE	Polypyrimidine tract-binding protein 1 OS=Mus musculus OX=10090 GN=Ptbp1 PE=1 SV=2	1	7	23.3	56.477	527	0	53.513	1//0	1//0	1//0	97865000	20	18			-1	4893300	1364900	82601	3445800	82806000	27985000	75085000				6.19642e+07	1.28395e+06	3.07262e+07	-1.56508	0.14735516372796	-0.141211	0.385164051355207	1.42387	0.882080924855491	-5.59277	0.00347222222222222	-1.01196	0.230869001297017	4.5808	0.993908629441624	45.4557	1.32517	29.6001
sp|P17427|AP2A2_MOUSE	Ap2a2	sp|P17427|AP2A2_MOUSE;sp|P17426-2|AP2A1_MOUSE;sp|P17426|AP2A1_MOUSE	sp|P17427|AP2A2_MOUSE;sp|P17426-2|AP2A1_MOUSE;sp|P17426|AP2A1_MOUSE	AP-2 complex subunit alpha-2 OS=Mus musculus OX=10090 GN=Ap2a2 PE=1 SV=2;Isoform B of AP-2 complex subunit alpha-1 OS=Mus musculus OX=10090 GN=Ap2a1;AP-2 complex subunit alpha-1 OS=Mus musculus OX=10090 GN=Ap2a1 PE=1 SV=1	3	2	3.5	104.02	938	0.0011435	13.77	0//0	1//0	0//0	16016000	49	4			-1;-1;-1	326860		326860			19906000		SPL_6027		SPL_6027		1.24478e+07														0	5.24382	0
sp|P17439|GLCM_MOUSE	Gba	sp|P17439|GLCM_MOUSE	sp|P17439|GLCM_MOUSE	Lysosomal acid glucosylceramidase OS=Mus musculus OX=10090 GN=Gba PE=1 SV=1	1	14	49.7	57.621	515	0	176.69	0//0	1//0	1//0	554690000	22	33			-1	25213000		13952000	11261000		324530000	255960000	SPL_6027	SPL_21358			1.09749e+08	9.11284e+07					-0.342433	0.50635838150289					-0.268238	0.566497461928934	0	223.832	96.7343
sp|P17665|COX7C_MOUSE	Cox7c	sp|P17665|COX7C_MOUSE	sp|P17665|COX7C_MOUSE	Cytochrome c oxidase subunit 7C, mitochondrial OS=Mus musculus OX=10090 GN=Cox7c PE=1 SV=1	1	4	50.8	7.3325	63	0	101.2	0//0	1//0	0//0	356140000	5	10			-1	71227000		71227000			480910000		SPL_6027		SPL_6027		2.65744e+08														0	1142.7	0
sp|P17742|PPIA_MOUSE	Ppia	sp|P17742|PPIA_MOUSE	sp|P17742|PPIA_MOUSE	Peptidyl-prolyl cis-trans isomerase A OS=Mus musculus OX=10090 GN=Ppia PE=1 SV=2	1	6	42.7	17.971	164	0	44.077	1//0	1//0	0//0	37394000	10	11			-1	3739400	1261500	2477900			31445000			SPL_M	SPL_6027	3.31523e+07	1.92585e+07								-0.783611	0.283564814814815					42.0122	39.753	0
sp|P17751|TPIS_MOUSE	Tpi1	sp|P17751|TPIS_MOUSE;sp|P17751-2|TPIS_MOUSE	sp|P17751|TPIS_MOUSE;sp|P17751-2|TPIS_MOUSE	Triosephosphate isomerase OS=Mus musculus OX=10090 GN=Tpi1 PE=1 SV=5;Isoform 2 of Triosephosphate isomerase OS=Mus musculus OX=10090 GN=Tpi1	2	17	85.9	26.712	249	0	323.31	1//0	1//0	1//0	18775000000	14	235			-1;-1	1341000000	209360000	90076000	1041600000	13901000000	1941800000	11720000000				3.87468e+09	5.49061e+08	3.64044e+09	-2.83972	0.0428211586901763	-0.246216	0.360912981455064	2.59351	0.980346820809249	-2.81904	0.0636574074074074	-0.0899633	0.399481193255512	2.72908	0.945177664974619	6972.39	1445.09	8947.56
sp|P17918|PCNA_MOUSE	Pcna	sp|P17918|PCNA_MOUSE	sp|P17918|PCNA_MOUSE	Proliferating cell nuclear antigen OS=Mus musculus OX=10090 GN=Pcna PE=1 SV=2	1	3	13.4	28.785	261	0.00061501	17.749	0//0	1//0	0//0	13505000	16	5			-1	844060		844060			17883000		SPL_6027		SPL_6027		1.04962e+07														0	13.5413	0
sp|P18242|CATD_MOUSE	Ctsd	sp|P18242|CATD_MOUSE	sp|P18242|CATD_MOUSE	Cathepsin D OS=Mus musculus OX=10090 GN=Ctsd PE=1 SV=1	1	8	30.2	44.953	410	0	125.87	1//0	1//0	1//0	416000000	18	35			-1	23111000	899120	15464000	6748400	87646000	317740000	133120000				3.56762e+07	1.3822e+08	5.94707e+07	1.85809	0.763224181360202	0.602967	0.661911554921541	-1.25512	0.329479768786127	1.95393	0.75462962962963	0.737216	0.642023346303502	-1.21672	0.352284263959391	29.9437	248.089	57.9701
sp|P18528|HVM57_MOUSE		sp|P18528|HVM57_MOUSE	sp|P18528|HVM57_MOUSE	Ig heavy chain V region 6.96 OS=Mus musculus OX=10090 PE=4 SV=1	1	2	30.6	11.007	98	0.00060423	16.641	1//0	0//0	1//0	3333200	5	2			-1	666650	666650			14736000			SPL_M		SPL_21358	8.75986e+06		0													22.2017	0	0
sp|P18572-2|BASI_MOUSE	Bsg	sp|P18572-2|BASI_MOUSE;sp|P18572|BASI_MOUSE	sp|P18572-2|BASI_MOUSE;sp|P18572|BASI_MOUSE	Isoform 2 of Basigin OS=Mus musculus OX=10090 GN=Bsg;Basigin OS=Mus musculus OX=10090 GN=Bsg PE=1 SV=2	2	6	25.6	29.674	273	0	86.515	1//0	1//0	0//0	308480000	13	22			-1;-1	23729000	822830	22907000		79416000	351390000			SPL_M	SPL_6027	2.81107e+07	1.9018e+08		2.14557	0.801007556675063					2.75818	0.857638888888889					27.403	367.497	0
sp|P18760|COF1_MOUSE	Cfl1	sp|P18760|COF1_MOUSE;sp|P45591|COF2_MOUSE	sp|P18760|COF1_MOUSE	Cofilin-1 OS=Mus musculus OX=10090 GN=Cfl1 PE=1 SV=3	2	15	72.9	18.559	166	0	323.31	1//0	1//0	1//0	1507100000	10	123			-1;-1	150710000	56561000	25719000	68435000	1962300000	486260000	1097500000				7.30288e+08	1.02828e+08	2.01696e+08	-2.01275	0.0919395465994962	-0.838325	0.222539229671897	1.17442	0.842774566473988	-2.82823	0.0625	-1.85629	0.133592736705577	0.971946	0.791878172588833	1883.67	412.61	587.871
sp|P19096|FAS_MOUSE	Fasn	sp|P19096|FAS_MOUSE	sp|P19096|FAS_MOUSE	Fatty acid synthase OS=Mus musculus OX=10090 GN=Fasn PE=1 SV=2	1	32	18.9	272.43	2504	0	323.31	1//0	1//0	1//0	947730000	117	78			-1	8100200	583390	115610	7401200	378270000	22448000	663210000				9.49486e+07	1.0513e+07	1.74641e+08	-4.07476	0.0138539042821159	0.810049	0.724679029957204	4.88481	0.997687861271676	-3.17498	0.0451388888888889	0.879177	0.671854734111543	4.05415	0.986802030456853	19.4288	1.85473	63.5778
sp|P19157|GSTP1_MOUSE	Gstp1	sp|P19157|GSTP1_MOUSE;sp|P46425|GSTP2_MOUSE	sp|P19157|GSTP1_MOUSE	Glutathione S-transferase P 1 OS=Mus musculus OX=10090 GN=Gstp1 PE=1 SV=2	2	11	66.7	23.609	210	0	323.31	1//0	1//0	1//0	2187200000	9	85			-1;-1	243020000	29272000	30679000	183070000	1074400000	495800000	1428400000				4.29941e+08	1.55933e+08	5.68523e+08	-1.1157	0.209068010075567	0.410869	0.589158345221113	1.52657	0.898265895953757	-1.46321	0.195601851851852	0.40308	0.559014267185473	1.86629	0.888324873096447	974.856	492.184	1572.61
sp|P19253|RL13A_MOUSE	Rpl13a	sp|P19253|RL13A_MOUSE	sp|P19253|RL13A_MOUSE	60S ribosomal protein L13a OS=Mus musculus OX=10090 GN=Rpl13a PE=1 SV=4	1	7	31	23.464	203	0	49.74	1//0	1//0	0//0	151950000	9	16			-1	16883000	2292500	14591000		107510000	157490000			SPL_M	SPL_6027	5.42211e+07	7.20777e+07		0.550789	0.557934508816121					0.410698	0.480324074074074					76.3479	234.084	0
sp|P19324|SERPH_MOUSE	Serpinh1	sp|P19324|SERPH_MOUSE	sp|P19324|SERPH_MOUSE	Serpin H1 OS=Mus musculus OX=10090 GN=Serpinh1 PE=1 SV=3	1	4	12.7	46.533	417	0	39.43	1//0	1//0	1//0	37170000	23	10			-1	1616100	519910	425480	670690	43887000	23596000					3.14251e+07	7.6058e+06	7.55245e+06	-0.895251	0.243073047858942					-2.04675	0.144675925925926	-2.0569	0.101167315175097	-0.0101552	0.617258883248731	17.3147	6.82598	5.76137
sp|P19426-2|NELFE_MOUSE	Nelfe	sp|P19426-2|NELFE_MOUSE;sp|P19426|NELFE_MOUSE	sp|P19426-2|NELFE_MOUSE;sp|P19426|NELFE_MOUSE	Isoform 2 of Negative elongation factor E OS=Mus musculus OX=10090 GN=Nelfe;Negative elongation factor E OS=Mus musculus OX=10090 GN=Nelfe PE=1 SV=2	2	13	45.8	41.483	367	0	213.05	0//0	1//0	1//0	178560000	18	31			-1;-1	9920000		9576100	343960		218880000		SPL_6027	SPL_21358			7.87992e+07	3.03123e+06											-4.70021	0.0355329949238579	0	153.63	2.95469
sp|P19437|CD20_MOUSE	Ms4a1	sp|P19437|CD20_MOUSE	sp|P19437|CD20_MOUSE	B-lymphocyte antigen CD20 OS=Mus musculus OX=10090 GN=Ms4a1 PE=1 SV=1	1	10	55.7	31.958	291	0	240.73	0//0	1//0	0//0	466260000	8	30			-1	58283000		58283000			614040000		SPL_6027		SPL_6027		2.13797e+08														0	935.035	0
sp|P19536|COX5B_MOUSE	Cox5b	sp|P19536|COX5B_MOUSE	sp|P19536|COX5B_MOUSE	Cytochrome c oxidase subunit 5B, mitochondrial OS=Mus musculus OX=10090 GN=Cox5b PE=1 SV=1	1	12	62.5	13.813	128	0	221.93	1//0	1//0	1//0	5009900000	8	123			-1	626240000	22248000	468620000	135370000	1099200000	4388600000	1100900000				3.28141e+08	1.63771e+09	4.52334e+08	1.99731	0.783375314861461	0.00222952	0.440798858773181	-1.99508	0.216184971098266	2.31929	0.811342592592593	0.463072	0.578469520103761	-1.85622	0.250761421319797	740.933	7518.08	1162.86
sp|P19783|COX41_MOUSE	Cox4i1	sp|P19783|COX41_MOUSE	sp|P19783|COX41_MOUSE	Cytochrome c oxidase subunit 4 isoform 1, mitochondrial OS=Mus musculus OX=10090 GN=Cox4i1 PE=1 SV=2	1	17	57.4	19.53	169	0	314.12	1//0	1//0	0//0	2142500000	11	61			-1	194770000	175030	194590000		12481000	2773800000			SPL_M	SPL_6027	5.05958e+06	1.12799e+09		7.79599	0.996221662468514					7.80052	0.997685185185185					5.82909	3121.81	0
sp|P19973-2|LSP1_MOUSE	Lsp1	sp|P19973-2|LSP1_MOUSE;sp|P19973|LSP1_MOUSE	sp|P19973-2|LSP1_MOUSE;sp|P19973|LSP1_MOUSE	Isoform 2 of Lymphocyte-specific protein 1 OS=Mus musculus OX=10090 GN=Lsp1;Lymphocyte-specific protein 1 OS=Mus musculus OX=10090 GN=Lsp1 PE=1 SV=2	2	3	12.2	36.548	328	0	21.477	1//0	1//0	0//0	18426000	17	7			-1;-1	1083900	157580	926270		17625000	13920000			SPL_M	SPL_6027	7.04029e+06	1.22385e+07		-0.340464	0.367758186397985					0.797723	0.560185185185185					5.24794	14.8602	0
sp|P20029|BIP_MOUSE	Hspa5	sp|P20029|BIP_MOUSE	sp|P20029|BIP_MOUSE	Endoplasmic reticulum chaperone BiP OS=Mus musculus OX=10090 GN=Hspa5 PE=1 SV=3	1	39	55.7	72.421	655	0	323.31	1//0	1//0	1//0	9219400000	32	362			-1	288110000	31530000	103280000	153290000	4649300000	4027600000	4415700000				5.73075e+08	5.25309e+08	5.92168e+08	-0.207093	0.397984886649874	-0.0743714	0.410841654778887	0.132722	0.61849710982659	-0.125558	0.403935185185185	0.0472837	0.437094682230869	0.172842	0.661928934010152	1050.05	1656.92	1316.79
sp|P20040|HB24_MOUSE		sp|P20040|HB24_MOUSE;sp|P18468|HB2I_MOUSE;sp|P04231|HB23_MOUSE;sp|P04230|HB21_MOUSE	sp|P20040|HB24_MOUSE;sp|P18468|HB2I_MOUSE;sp|P04231|HB23_MOUSE	H-2 class II histocompatibility antigen, E-Q beta chain OS=Mus musculus OX=10090 PE=1 SV=1;H-2 class II histocompatibility antigen, I-A beta chain OS=Mus musculus OX=10090 GN=H2-Eb1 PE=1 SV=1;H-2 class II histocompatibility antigen, E-S beta chain (Fragmen	4	9	39	30.204	264	0	107.48	0//0	1//0	0//0	347760000	14	28			-1;-1;-1;-1	24840000		24840000			441540000		SPL_6027		SPL_6027		1.45176e+08														0	398.509	0
sp|P20152|VIME_MOUSE	Vim	sp|P20152|VIME_MOUSE;sp|P08670|VIME_HUMAN;CON__sp|P08670|VIME_HUMAN	sp|P20152|VIME_MOUSE;sp|P08670|VIME_HUMAN;CON__sp|P08670|VIME_HUMAN	Vimentin OS=Mus musculus OX=10090 GN=Vim PE=1 SV=3;Vimentin OS=Homo sapiens GN=VIM PE=1 SV=4;	3	2	4.1	53.687	466	0.0021942	12.256	0//0	1//0	0//0	13695000	32	4		+	-1;-1;-1	427980		427980			17042000		SPL_6027		SPL_6027		1.06442e+07														0	6.86609	0
sp|P20491|FCERG_MOUSE	Fcer1g	sp|P20491|FCERG_MOUSE	sp|P20491|FCERG_MOUSE	High affinity immunoglobulin epsilon receptor subunit gamma OS=Mus musculus OX=10090 GN=Fcer1g PE=1 SV=1	1	4	32.6	9.6523	86	0	30.911	0//0	1//0	0//0	125210000	2	10			-1	62603000		62603000			160730000		SPL_6027		SPL_6027		8.33308e+07														0	1004.34	0
sp|P20664|PRI1_MOUSE	Prim1	sp|P20664|PRI1_MOUSE	sp|P20664|PRI1_MOUSE	DNA primase small subunit OS=Mus musculus OX=10090 GN=Prim1 PE=1 SV=1	1	2	5	49.295	417	0.0011068	12.493	0//0	1//0	0//0	15549000	27	3			-1	575870		575870			20198000		SPL_6027		SPL_6027		1.20846e+07														0	9.23869	0
sp|P20918|PLMN_MOUSE	Plg	sp|P20918|PLMN_MOUSE	sp|P20918|PLMN_MOUSE	Plasminogen OS=Mus musculus OX=10090 GN=Plg PE=1 SV=3	1	3	3.1	90.807	812	0	18.451	1//0	0//0	1//0	18883000	43	3			-1	439150	26062		413090			14937000	SPL_M		SPL_21358	2.94518e+06		8.69654e+06									1.56208	0.811932555123217			0.867952	0	3.54853
sp|P21107-2|TPM3_MOUSE	Tpm3	sp|P21107-2|TPM3_MOUSE;sp|P21107|TPM3_MOUSE;sp|P58771-2|TPM1_MOUSE;sp|P58771|TPM1_MOUSE;sp|P58774-2|TPM2_MOUSE;sp|P58774|TPM2_MOUSE	sp|P21107-2|TPM3_MOUSE;sp|P21107|TPM3_MOUSE	Isoform 2 of Tropomyosin alpha-3 chain OS=Mus musculus OX=10090 GN=Tpm3;Tropomyosin alpha-3 chain OS=Mus musculus OX=10090 GN=Tpm3 PE=1 SV=3	6	10	36.3	29.02	248	0	88.485	1//0	1//0	1//0	131100000	16	23			-1;-1;-1;-1;-1;-1	8194000	589940	7604100		31561000	169500000					2.48059e+07	4.74755e+07	0	2.42507	0.832493702770781					0.936496	0.583333333333333					19.647	121.993	0
sp|P21126|UBL4A_MOUSE	Ubl4a	sp|P21126|UBL4A_MOUSE	sp|P21126|UBL4A_MOUSE	Ubiquitin-like protein 4A OS=Mus musculus OX=10090 GN=Ubl4a PE=1 SV=1	1	4	26.8	17.8	157	0	28.886	0//0	1//0	0//0	38679000	9	7			-1	4297700		4297700			51071000		SPL_6027		SPL_6027		2.82685e+07														0	68.9481	0
sp|P21279|GNAQ_MOUSE	Gnaq	sp|P21279|GNAQ_MOUSE;sp|P30677|GNA14_MOUSE;sp|P21278|GNA11_MOUSE	sp|P21279|GNAQ_MOUSE	Guanine nucleotide-binding protein G(q) subunit alpha OS=Mus musculus OX=10090 GN=Gnaq PE=1 SV=4	3	5	19.2	42.158	359	0	35.944	0//0	1//0	0//0	45634000	19	10			-1;-1;-1	2401800		2401800			57577000		SPL_6027		SPL_6027		2.94146e+07														0	38.5321	0
sp|P21460|CYTC_MOUSE	Cst3	sp|P21460|CYTC_MOUSE	sp|P21460|CYTC_MOUSE	Cystatin-C OS=Mus musculus OX=10090 GN=Cst3 PE=1 SV=2	1	2	20	15.531	140	0.0021704	11.858	1//0	0//0	0//0	15089000	8	3			-1	1886100	1886100			70257000			SPL_M	SPL_M		3.96526e+07															62.8134	0	0
sp|P21614|VTDB_MOUSE	Gc	sp|P21614|VTDB_MOUSE	sp|P21614|VTDB_MOUSE	Vitamin D-binding protein OS=Mus musculus OX=10090 GN=Gc PE=1 SV=2	1	5	13.7	53.6	476	0	40.612	0//0	1//0	1//0	49154000	24	10			-1	2048100		1489400	558700		33800000	21031000	SPL_6027	SPL_21358			2.63328e+07	6.56484e+06					-0.684506	0.427745664739884					-2.00403	0.225380710659898	0	23.8945	4.79935
sp|P21956-2|MFGM_MOUSE	Mfge8	sp|P21956-2|MFGM_MOUSE;sp|P21956|MFGM_MOUSE	sp|P21956-2|MFGM_MOUSE;sp|P21956|MFGM_MOUSE	Isoform 2 of Lactadherin OS=Mus musculus OX=10090 GN=Mfge8;Lactadherin OS=Mus musculus OX=10090 GN=Mfge8 PE=1 SV=3	2	12	35.2	47.169	426	0	97.689	0//0	1//0	0//0	104590000	21	15			-1;-1	4980300		4980300			129530000		SPL_6027		SPL_6027		4.02301e+07														0	79.899	0
sp|P21958|TAP1_MOUSE	Tap1	sp|P21958|TAP1_MOUSE	sp|P21958|TAP1_MOUSE	Antigen peptide transporter 1 OS=Mus musculus OX=10090 GN=Tap1 PE=1 SV=3	1	9	20.6	78.863	724	0	146.22	0//0	1//0	0//0	153690000	30	17			-1	5122900		5122900			196570000		SPL_6027		SPL_6027		8.14027e+07														0	82.1868	0
sp|P22315|HEMH_MOUSE	Fech	sp|P22315|HEMH_MOUSE	sp|P22315|HEMH_MOUSE	Ferrochelatase, mitochondrial OS=Mus musculus OX=10090 GN=Fech PE=1 SV=2	1	19	60	47.13	420	0	323.31	1//0	1//0	1//0	2617900000	25	124			-1	104720000	4674600	21213000	78828000	682380000	694390000	1519600000				1.73121e+08	1.70137e+08	4.22553e+08	0.0251708	0.444584382871537	1.15504	0.810271041369472	1.12987	0.832369942196532	-0.0250822	0.420138888888889	1.28735	0.760051880674449	1.31243	0.83756345177665	155.68	340.321	677.149
sp|P23116|EIF3A_MOUSE	Eif3a	sp|P23116|EIF3A_MOUSE	sp|P23116|EIF3A_MOUSE	Eukaryotic translation initiation factor 3 subunit A OS=Mus musculus OX=10090 GN=Eif3a PE=1 SV=5	1	6	5.8	161.93	1344	0	38.98	0//0	1//0	1//0	72999000	65	8			-1	1123100		245070	877990			48466000	SPL_6027	SPL_21358			1.23807e+07	2.42139e+07											0.967743	0.790862944162437	0	3.93166	7.54212
sp|P23198|CBX3_MOUSE	Cbx3	sp|P23198|CBX3_MOUSE;sp|P83917|CBX1_MOUSE	sp|P23198|CBX3_MOUSE	Chromobox protein homolog 3 OS=Mus musculus OX=10090 GN=Cbx3 PE=1 SV=2	2	3	23	20.855	183	0	33.753	1//0	1//0	1//0	26499000	8	9			-1;-1	3312400	816060	2496400		26495000	27788000					1.71566e+07	1.55216e+07	0	0.0687419	0.455919395465995					-0.14449	0.400462962962963					27.1775	40.0498	0
sp|P23492|PNPH_MOUSE	Pnp	sp|P23492|PNPH_MOUSE	sp|P23492|PNPH_MOUSE	Purine nucleoside phosphorylase OS=Mus musculus OX=10090 GN=Pnp PE=1 SV=2	1	11	55.4	32.277	289	0	199.72	1//0	1//0	1//0	420240000	15	22			-1	28016000	60528	722350	27233000	9424000		341530000				2.38597e+06	8.42125e+06	1.25565e+08			5.17953	0.995720399429387			1.81946	0.737268518518518	5.71771	0.998702983138781	3.89825	0.981725888324873	2.01579	11.5887	233.937
sp|P23927|CRYAB_MOUSE	Cryab	sp|P23927|CRYAB_MOUSE	sp|P23927|CRYAB_MOUSE	Alpha-crystallin B chain OS=Mus musculus OX=10090 GN=Cryab PE=1 SV=2	1	3	19.4	20.069	175	0.000612	17.523	1//0	1//0	1//0	21042000	10	6			-1	2104200	137390	457120	1509700		5402300	13247000				3.61059e+06	3.55273e+06	7.39137e+06					1.29402	0.861271676300578	-0.0233056	0.421296296296296	1.03361	0.705577172503243	1.05691	0.809137055837563	4.57555	7.33358	12.9686
sp|P24547|IMDH2_MOUSE	Impdh2	sp|P24547|IMDH2_MOUSE	sp|P24547|IMDH2_MOUSE	Inosine-5-monophosphate dehydrogenase 2 OS=Mus musculus OX=10090 GN=Impdh2 PE=1 SV=2	1	28	64.6	55.814	514	0	323.31	1//0	1//0	1//0	5045900000	21	201			-1	240280000	19946000	24178000	196160000	2094000000	828430000	3134900000				3.50363e+08	1.24222e+08	7.08607e+08	-1.33781	0.161209068010076	0.582158	0.653352353780314	1.91997	0.936416184971098	-1.49593	0.193287037037037	1.01613	0.701686121919585	2.51207	0.934010152284264	664.269	387.888	1685.05
sp|P24549|AL1A1_MOUSE	Aldh1a1	sp|P24549|AL1A1_MOUSE;sp|O35945|AL1A7_MOUSE	sp|P24549|AL1A1_MOUSE;sp|O35945|AL1A7_MOUSE	Retinal dehydrogenase 1 OS=Mus musculus OX=10090 GN=Aldh1a1 PE=1 SV=5;Aldehyde dehydrogenase, cytosolic 1 OS=Mus musculus OX=10090 GN=Aldh1a7 PE=1 SV=1	2	7	20	54.467	501	0	53.587	1//0	1//0	1//0	129610000	22	14			-1;-1	5891200	161380	1571900	4157900		37289000	85073000				9.33003e+06	2.60447e+07	4.47855e+07					1.18995	0.846242774566474	1.48104	0.675925925925926	2.26308	0.891050583657588	0.782042	0.770558375634518	5.37449	25.218	35.7172
sp|P25206|MCM3_MOUSE	Mcm3	sp|P25206|MCM3_MOUSE	sp|P25206|MCM3_MOUSE	DNA replication licensing factor MCM3 OS=Mus musculus OX=10090 GN=Mcm3 PE=1 SV=2	1	30	46.2	91.545	812	0	323.31	1//0	1//0	1//0	1644400000	51	125			-1	32242000	1405000	10168000	20669000	449500000	542150000	890680000				6.31134e+07	1.05104e+08	2.81007e+08	0.270371	0.498740554156171	0.986586	0.784593437945792	0.716215	0.757225433526012	0.735794	0.545138888888889	2.15459	0.878080415045396	1.41879	0.848730964467005	46.7912	163.125	177.551
sp|P25444|RS2_MOUSE	Rps2	sp|P25444|RS2_MOUSE	sp|P25444|RS2_MOUSE	40S ribosomal protein S2 OS=Mus musculus OX=10090 GN=Rps2 PE=1 SV=3	1	15	48.8	31.231	293	0	200.49	1//0	1//0	1//0	1331900000	18	82			-1	73993000	8493900	41550000	23949000	796750000	778010000	451770000				2.21837e+08	2.83337e+08	1.45113e+08	-0.0343384	0.425692695214106	-0.818539	0.229671897289586	-0.7842	0.405780346820809	0.353024	0.478009259259259	-0.612319	0.293125810635538	-0.965343	0.414213197969543	282.875	666.587	205.727
sp|P25799-4|NFKB1_MOUSE	Nfkb1	sp|P25799-4|NFKB1_MOUSE;sp|P25799-2|NFKB1_MOUSE;sp|P25799-3|NFKB1_MOUSE;sp|P25799|NFKB1_MOUSE	sp|P25799-4|NFKB1_MOUSE;sp|P25799-2|NFKB1_MOUSE;sp|P25799-3|NFKB1_MOUSE;sp|P25799|NFKB1_MOUSE	Isoform 4 of Nuclear factor NF-kappa-B p105 subunit OS=Mus musculus OX=10090 GN=Nfkb1;Isoform 2 of Nuclear factor NF-kappa-B p105 subunit OS=Mus musculus OX=10090 GN=Nfkb1;Isoform 3 of Nuclear factor NF-kappa-B p105 subunit OS=Mus musculus OX=10090 GN=Nfkb	4	17	61.8	39.756	356	0	323.31	1//0	1//0	1//0	862090000	19	73			-1;-1;-1;-1	45373000	2081000	27346000	15946000	227500000	534320000	356280000				6.18096e+07	1.75325e+08	9.83599e+07	1.23184	0.680100755667506	0.647145	0.671897289586305	-0.584693	0.452023121387283	1.50413	0.686342592592593	0.67024	0.625162127107652	-0.833892	0.439593908629442	69.3043	438.712	136.979
sp|P25911-2|LYN_MOUSE	Lyn	sp|P25911-2|LYN_MOUSE;sp|P25911|LYN_MOUSE;sp|P16277|BLK_MOUSE	sp|P25911-2|LYN_MOUSE;sp|P25911|LYN_MOUSE	Isoform 2 of Tyrosine-protein kinase Lyn OS=Mus musculus OX=10090 GN=Lyn;Tyrosine-protein kinase Lyn OS=Mus musculus OX=10090 GN=Lyn PE=1 SV=4	3	9	21	56.285	491	0	65.444	0//0	1//0	0//0	74762000	28	15			-1;-1;-1	2670100		2670100			90511000		SPL_6027		SPL_6027		3.50182e+07														0	42.8365	0
sp|P26039|TLN1_MOUSE	Tln1	sp|P26039|TLN1_MOUSE	sp|P26039|TLN1_MOUSE	Talin-1 OS=Mus musculus OX=10090 GN=Tln1 PE=1 SV=2	1	15	11.2	269.82	2541	0	160.45	1//0	1//0	1//0	173710000	134	40			-1	1296300	204450	43195	1048700	126610000	5746100	122270000				3.31698e+07	4.49858e+06	4.4401e+07	-4.46166	0.0113350125944584	-0.0503209	0.416547788873039	4.41134	0.995375722543353	-2.88233	0.0590277777777778	0.420724	0.565499351491569	3.30305	0.970558375634518	6.80887	0.692978	9.00855
sp|P26041|MOES_MOUSE	Msn	sp|P26041|MOES_MOUSE;sp|P26043|RADI_MOUSE;sp|P26040|EZRI_MOUSE	sp|P26041|MOES_MOUSE;sp|P26043|RADI_MOUSE;sp|P26040|EZRI_MOUSE	Moesin OS=Mus musculus OX=10090 GN=Msn PE=1 SV=3;Radixin OS=Mus musculus OX=10090 GN=Rdx PE=1 SV=3;Ezrin OS=Mus musculus OX=10090 GN=Ezr PE=1 SV=3	3	4	7.1	67.766	577	0	34.019	1//0	1//0	1//0	95790000	34	12			-1;-1;-1	2817400	295330	772250	1749800	53711000	44576000	30615000				2.63886e+07	2.04069e+07	2.91269e+07	-0.26895	0.382871536523929	-0.810979	0.232524964336662	-0.542028	0.464739884393064	-0.370862	0.356481481481481	0.142435	0.465629053177691	0.513298	0.717766497461929	9.83548	12.3892	15.0311
sp|P26369|U2AF2_MOUSE	U2af2	sp|P26369|U2AF2_MOUSE	sp|P26369|U2AF2_MOUSE	Splicing factor U2AF 65 kDa subunit OS=Mus musculus OX=10090 GN=U2af2 PE=1 SV=3	1	4	9.7	53.516	475	0	32.218	1//0	1//0	0//0	58228000	15	7			-1	3881900	254830	3627100		35266000	55277000			SPL_M	SPL_6027	1.00455e+07	4.22848e+07		0.648401	0.57808564231738					2.07359	0.774305555555556					8.48669	58.1896	0
sp|P26443|DHE3_MOUSE	Glud1	sp|P26443|DHE3_MOUSE	sp|P26443|DHE3_MOUSE	Glutamate dehydrogenase 1, mitochondrial OS=Mus musculus OX=10090 GN=Glud1 PE=1 SV=1	1	3	7.3	61.336	558	0	18.604	1//0	1//0	0//0	31968000	31	4			-1	1031200	13314	1017900			45197000			SPL_M	SPL_6027	1.08462e+06	2.45246e+07								4.49897	0.958333333333333					0.443401	16.3302	0
sp|P26450|P85A_MOUSE	Pik3r1	sp|P26450|P85A_MOUSE;sp|O08908|P85B_MOUSE;sp|Q9QZE2-2|CLNK_MOUSE;sp|Q9QZE2|CLNK_MOUSE;sp|Q64143|P55G_MOUSE	sp|P26450|P85A_MOUSE	Phosphatidylinositol 3-kinase regulatory subunit alpha OS=Mus musculus OX=10090 GN=Pik3r1 PE=1 SV=2	5	20	28.9	83.516	724	0	294.77	1//0	1//0	1//0	502320000	34	55			-1;-1;-1;-1;-1	14774000	402800	3678600	10693000	104940000	130660000	295160000				3.07279e+07	3.60069e+07	1.29445e+08	0.316253	0.505037783375315	1.49193	0.865905848787446	1.17568	0.84393063583815	0.228721	0.461805555555556	2.07471	0.866407263294423	1.84599	0.885279187817259	13.4146	59.0158	91.8551
sp|P26516|PSMD7_MOUSE	Psmd7	sp|P26516|PSMD7_MOUSE	sp|P26516|PSMD7_MOUSE	26S proteasome non-ATPase regulatory subunit 7 OS=Mus musculus OX=10090 GN=Psmd7 PE=1 SV=2	1	18	63.2	36.539	321	0	323.31	1//0	1//0	1//0	1854200000	15	88			-1	123610000	2755300	66060000	54798000	243230000	1157600000	749920000				6.29744e+07	3.44859e+08	2.94881e+08	2.25074	0.809823677581864	1.62442	0.885877318116976	-0.626328	0.442774566473988	2.45317	0.827546296296296	2.22729	0.885862516212711	-0.225874	0.574619289340102	91.7607	1059.8	470.726
sp|P26645|MARCS_MOUSE	Marcks	sp|P26645|MARCS_MOUSE	sp|P26645|MARCS_MOUSE	Myristoylated alanine-rich C-kinase substrate OS=Mus musculus OX=10090 GN=Marcks PE=1 SV=2	1	7	41.7	29.661	309	0	193.55	0//0	1//0	1//0	722730000	11	30			-1	65703000		63367000	2335900		846420000	88773000	SPL_6027	SPL_21358			4.85779e+08	1.16114e+07					-3.25318	0.114450867052023					-5.38669	0.0192893401015228	0	1016.6	20.0659
sp|P27005|S10A8_MOUSE	S100a8	sp|P27005|S10A8_MOUSE	sp|P27005|S10A8_MOUSE	Protein S100-A8 OS=Mus musculus OX=10090 GN=S100a8 PE=1 SV=3	1	11	100	10.294	89	0	323.31	1//0	1//0	1//0	20861000000	5	281			-1	4172200000	865830000	512190000	2794200000	19306000000	4311600000	11370000000				1.02036e+10	1.43492e+09	6.32108e+09	-2.16275	0.0806045340050378	-0.763817	0.241084165477889	1.39894	0.879768786127168	-2.83004	0.0613425925925926	-0.690833	0.281452658884565	2.1392	0.913705583756345	28835	8217.07	24002.8
sp|P27046|MA2A1_MOUSE	Man2a1	sp|P27046|MA2A1_MOUSE;sp|Q8BRK9-2|MA2A2_MOUSE;sp|Q8BRK9|MA2A2_MOUSE	sp|P27046|MA2A1_MOUSE	Alpha-mannosidase 2 OS=Mus musculus OX=10090 GN=Man2a1 PE=1 SV=2	3	6	6	131.63	1150	0	38.266	0//0	1//0	0//0	40353000	56	6			-1;-1;-1	720600		720600			55123000		SPL_6027		SPL_6027		2.44097e+07														0	11.5606	0
sp|P27048|RSMB_MOUSE	Snrpb	sp|P27048|RSMB_MOUSE;sp|P63163|RSMN_MOUSE	sp|P27048|RSMB_MOUSE;sp|P63163|RSMN_MOUSE	Small nuclear ribonucleoprotein-associated protein B OS=Mus musculus OX=10090 GN=Snrpb PE=1 SV=1;Small nuclear ribonucleoprotein-associated protein N OS=Mus musculus OX=10090 GN=Snrpn PE=1 SV=1	2	7	26	23.656	231	0	52.5	1//0	1//0	1//0	371710000	13	28			-1;-1	28593000	129320	12016000	16448000	11221000	181950000	196360000				4.41804e+06	8.33712e+07	9.51744e+07	4.01927	0.924433249370277	4.12923	0.984308131241084	0.109959	0.615028901734104	4.23807	0.949074074074074	4.4291	0.989623865110246	0.191025	0.665989847715736	4.30679	192.773	141.292
sp|P27659|RL3_MOUSE	Rpl3	sp|P27659|RL3_MOUSE	sp|P27659|RL3_MOUSE	60S ribosomal protein L3 OS=Mus musculus OX=10090 GN=Rpl3 PE=1 SV=3	1	12	36.2	46.109	403	0	277.83	1//0	1//0	1//0	977340000	20	67			-1	48867000	7696600	33829000	7341000	557800000	893690000	250770000				2.34831e+08	2.16855e+08	6.17581e+07	0.680027	0.58816120906801	-1.15338	0.171184022824536	-1.83341	0.234682080924855	-0.114896	0.40625	-1.92693	0.123216601815824	-1.81203	0.255837563451777	256.323	542.719	63.0607
sp|P27773|PDIA3_MOUSE	Pdia3	sp|P27773|PDIA3_MOUSE	sp|P27773|PDIA3_MOUSE	Protein disulfide-isomerase A3 OS=Mus musculus OX=10090 GN=Pdia3 PE=1 SV=2	1	23	55.4	56.678	505	0	323.31	1//0	1//0	1//0	1318400000	30	96			-1	43948000	1680600	30433000	11835000	278110000	970550000	470010000				7.67106e+07	2.00225e+08	1.22615e+08	1.80315	0.756926952141058	0.757036	0.710413694721826	-1.04611	0.367630057803468	1.38412	0.66087962962963	0.676635	0.627756160830091	-0.70749	0.462944162436548	55.9696	488.237	101.665
sp|P28078|DMA_MOUSE	H2-DMa	sp|P28078|DMA_MOUSE	sp|P28078|DMA_MOUSE	Class II histocompatibility antigen, M alpha chain OS=Mus musculus OX=10090 GN=H2-DMa PE=1 SV=1	1	2	15.7	28.95	261	0	18.612	0//0	1//0	0//0	32383000	5	4			-1	6476600		6476600			41732000		SPL_6027		SPL_6027		2.51688e+07														0	103.904	0
sp|P28293|CATG_MOUSE	Ctsg	sp|P28293|CATG_MOUSE	sp|P28293|CATG_MOUSE	Cathepsin G OS=Mus musculus OX=10090 GN=Ctsg PE=1 SV=2	1	7	31.8	29.095	261	0	114.76	1//0	1//0	0//0	70677000	13	20			-1	5436700	1483800	3952900		70834000	81444000			SPL_M	SPL_6027	3.97656e+07	3.14035e+07		0.201366	0.482367758186398					-0.340596	0.362268518518519					49.4155	63.4164	0
sp|P28656|NP1L1_MOUSE	Nap1l1	sp|P28656|NP1L1_MOUSE	sp|P28656|NP1L1_MOUSE	Nucleosome assembly protein 1-like 1 OS=Mus musculus OX=10090 GN=Nap1l1 PE=1 SV=2	1	5	22	45.345	391	0	63.167	1//0	1//0	1//0	180810000	13	25			-1	13908000	905440	7206900	5796000	51106000	79389000	103330000				3.09331e+07	5.40079e+07	3.68895e+07	0.635446	0.575566750629723	1.01569	0.787446504992867	0.380248	0.673988439306358	0.804021	0.561342592592593	0.254057	0.505836575875486	-0.549963	0.50253807106599	30.1542	115.62	49.7888
sp|P28658|ATX10_MOUSE	Atxn10	sp|P28658|ATX10_MOUSE	sp|P28658|ATX10_MOUSE	Ataxin-10 OS=Mus musculus OX=10090 GN=Atxn10 PE=1 SV=2	1	3	8.2	53.706	475	0	45.622	0//0	1//0	0//0	25644000	28	6			-1	915850		915850			33019000		SPL_6027		SPL_6027		1.99306e+07														0	14.693	0
sp|P28660-2|NCKP1_MOUSE	Nckap1	sp|P28660-2|NCKP1_MOUSE;sp|P28660|NCKP1_MOUSE	sp|P28660-2|NCKP1_MOUSE;sp|P28660|NCKP1_MOUSE	Isoform 2 of Nck-associated protein 1 OS=Mus musculus OX=10090 GN=Nckap1;Nck-associated protein 1 OS=Mus musculus OX=10090 GN=Nckap1 PE=1 SV=2	2	9	12.4	118.52	1037	0	195.01	1//0	1//0	1//0	199560000	55	39			-1;-1	3628300	573350	374730	2680300	159260000	45327000	91630000				7.68152e+07	1.34891e+07	5.37593e+07	-1.81294	0.112090680100756	-0.797492	0.2339514978602	1.01545	0.813872832369942	-2.5096	0.103009259259259	-0.514878	0.315175097276265	1.99472	0.898477157360406	19.0945	6.0118	23.0243
sp|P28661-4|SEPT4_MOUSE	Septin4	sp|P28661-4|SEPT4_MOUSE;sp|P28661-2|SEPT4_MOUSE;sp|P28661|SEPT4_MOUSE;sp|P28661-5|SEPT4_MOUSE;sp|P28661-3|SEPT4_MOUSE;sp|P28661-6|SEPT4_MOUSE	sp|P28661-4|SEPT4_MOUSE;sp|P28661-2|SEPT4_MOUSE;sp|P28661|SEPT4_MOUSE;sp|P28661-5|SEPT4_MOUSE;sp|P28661-3|SEPT4_MOUSE	Isoform 4 of Septin-4 OS=Mus musculus OX=10090 GN=Septin4;Isoform 2 of Septin-4 OS=Mus musculus OX=10090 GN=Septin4;Septin-4 OS=Mus musculus OX=10090 GN=Septin4 PE=1 SV=1;Isoform 5 of Septin-4 OS=Mus musculus OX=10090 GN=Septin4;Isoform 3 of Septin-4 OS=Mu	6	9	35.6	43.788	379	0	116.54	0//0	1//0	1//0	137680000	21	16			-1;-1;-1;-1;-1;-1	6556400		5751800	804590		151620000		SPL_6027	SPL_21358			5.42282e+07	8.2724e+06											-2.71267	0.152284263959391	0	92.2762	6.91159
sp|P28665|MUG1_MOUSE	Mug1	sp|P28665|MUG1_MOUSE;sp|P28666|MUG2_MOUSE	sp|P28665|MUG1_MOUSE	Murinoglobulin-1 OS=Mus musculus OX=10090 GN=Mug1 PE=1 SV=3	2	5	4.4	165.3	1476	0	33.42	0//0	1//0	1//0	87872000	63	10			-1;-1	1394800		428210	966580		37026000	49837000	SPL_6027	SPL_21358			2.09672e+07	2.98138e+07					0.428679	0.691329479768786					0.507841	0.716751269035533	0	6.86978	8.30312
sp|P28798|GRN_MOUSE	Grn	sp|P28798|GRN_MOUSE	sp|P28798|GRN_MOUSE	Progranulin OS=Mus musculus OX=10090 GN=Grn PE=1 SV=2	1	10	24.6	63.458	589	0	323.31	1//0	1//0	1//0	8521800000	23	103			-1	370510000	35610000	101420000	233480000	1865700000	2954500000	6522500000				2.0805e+09	1.55608e+09	2.34688e+09	0.663197	0.584382871536524	1.80571	0.904422253922967	1.14251	0.838150289017341	-0.419011	0.346064814814815	0.173812	0.477302204928664	0.592823	0.73502538071066	1185.93	1627.08	2005.64
sp|P29341|PABP1_MOUSE	Pabpc1	sp|P29341|PABP1_MOUSE	sp|P29341|PABP1_MOUSE	Polyadenylate-binding protein 1 OS=Mus musculus OX=10090 GN=Pabpc1 PE=1 SV=2	1	18	33.3	70.67	636	0	270.96	1//0	1//0	1//0	356600000	31	56			-1	11503000	2389700	4050600	5062800	308410000	170940000	163380000				8.80591e+07	3.55411e+07	5.85456e+07	-0.85136	0.249370277078086	-0.916618	0.212553495007133	-0.0652586	0.571098265895954	-1.30898	0.210648148148148	-0.58891	0.298313878080415	0.720071	0.757360406091371	79.585	64.9838	43.4905
sp|P29387|GBB4_MOUSE	Gnb4	sp|P29387|GBB4_MOUSE	sp|P29387|GBB4_MOUSE	Guanine nucleotide-binding protein subunit beta-4 OS=Mus musculus OX=10090 GN=Gnb4 PE=1 SV=4	1	4	47.1	37.379	340	0	58.458	0//1	1//0	0//1	60573000	14	6			-1	4326600		4326600			80059000		SPL_6027		SPL_6027		4.70772e+07														0	69.4117	0
sp|P29391|FRIL1_MOUSE	Ftl1	sp|P29391|FRIL1_MOUSE;sp|P49945|FRIL2_MOUSE	sp|P29391|FRIL1_MOUSE;sp|P49945|FRIL2_MOUSE	Ferritin light chain 1 OS=Mus musculus OX=10090 GN=Ftl1 PE=1 SV=2;Ferritin light chain 2 OS=Mus musculus OX=10090 GN=Ftl2 PE=3 SV=2	2	14	73.2	20.802	183	0	323.31	1//0	1//0	1//0	5032700000	11	112			-1;-1	457520000	25038000	138290000	294190000	1520800000	1702800000	2803300000				5.06701e+08	7.59934e+08	1.15633e+09	0.163079	0.476070528967254	0.882296	0.754636233951498	0.719217	0.759537572254335	0.584739	0.511574074074074	1.19034	0.739299610894942	0.605601	0.741116751269036	833.849	2218.59	2527.15
sp|P29533|VCAM1_MOUSE	Vcam1	sp|P29533|VCAM1_MOUSE;sp|P29533-2|VCAM1_MOUSE	sp|P29533|VCAM1_MOUSE	Vascular cell adhesion protein 1 OS=Mus musculus OX=10090 GN=Vcam1 PE=1 SV=1	2	8	16.8	81.317	739	0	68.488	0//0	1//0	0//0	82733000	39	15			-1;-1	2121400		2121400			108880000		SPL_6027		SPL_6027		3.03319e+07														0	34.0337	0
sp|P29788|VTNC_MOUSE	Vtn	sp|P29788|VTNC_MOUSE	sp|P29788|VTNC_MOUSE	Vitronectin OS=Mus musculus OX=10090 GN=Vtn PE=1 SV=2	1	2	7.1	54.848	478	0.0021019	10.534	1//0	1//0	0//0	10410000	19	1			-1	547880	315400	232480			5452200			SPL_M	SPL_6027	1.57485e+07	3.43302e+06								-2.19766	0.126157407407407					10.5039	3.72968	0
sp|P30285|CDK4_MOUSE	Cdk4	sp|P30285|CDK4_MOUSE	sp|P30285|CDK4_MOUSE	Cyclin-dependent kinase 4 OS=Mus musculus OX=10090 GN=Cdk4 PE=1 SV=1	1	8	42.6	33.75	303	0	69.735	1//0	1//0	1//0	138110000	16	20			-1	8631600	754730	2176800	5700100	46559000	47223000	85313000				3.17349e+07	2.14754e+07	4.46516e+07	0.0204296	0.442065491183879	0.873706	0.750356633380884	0.853276	0.789595375722543	-0.563388	0.324074074074074	0.492641	0.590142671854734	1.05603	0.808121827411168	25.135	34.9224	48.965
sp|P30355|AL5AP_MOUSE	Alox5ap	sp|P30355|AL5AP_MOUSE	sp|P30355|AL5AP_MOUSE	Arachidonate 5-lipoxygenase-activating protein OS=Mus musculus OX=10090 GN=Alox5ap PE=1 SV=2	1	3	34.8	18.136	161	0	18.415	0//0	1//0	0//0	136050000	5	7			-1	27209000		27209000			178310000		SPL_6027		SPL_6027		1.05736e+08														0	436.514	0
sp|P31230|AIMP1_MOUSE	Aimp1	sp|P31230|AIMP1_MOUSE	sp|P31230|AIMP1_MOUSE	Aminoacyl tRNA synthase complex-interacting multifunctional protein 1 OS=Mus musculus OX=10090 GN=Aimp1 PE=1 SV=2	1	10	46.8	33.997	310	0	230.24	1//0	1//0	1//0	633370000	17	59			-1	37257000	1807900	16771000	18678000	177880000	239060000	362840000				6.32367e+07	1.19949e+08	1.33377e+08	0.426468	0.522670025188917	1.02843	0.793152639087018	0.601961	0.729479768786127	0.923589	0.579861111111111	1.07667	0.719844357976654	0.153083	0.656852791878173	60.2091	269.057	160.448
sp|P31725|S10A9_MOUSE	S100a9	sp|P31725|S10A9_MOUSE	sp|P31725|S10A9_MOUSE	Protein S100-A9 OS=Mus musculus OX=10090 GN=S100a9 PE=1 SV=3	1	12	86.7	13.049	113	0	323.31	1//0	1//0	1//0	16028000000	7	177			-1	2289700000	685060000	455930000	1148700000	22325000000	3659800000	6913100000				9.84241e+09	2.0545e+09	3.4122e+09	-2.60882	0.052896725440806	-1.69126	0.101283880171184	0.917568	0.801156069364162	-2.26022	0.121527777777778	-1.52831	0.164721141374838	0.731913	0.759390862944162	22814.8	7314.49	9867.57
sp|P32233|DRG1_MOUSE	Drg1	sp|P32233|DRG1_MOUSE	sp|P32233|DRG1_MOUSE	Developmentally-regulated GTP-binding protein 1 OS=Mus musculus OX=10090 GN=Drg1 PE=1 SV=1	1	8	29.7	40.512	367	0	66.99	1//0	1//0	1//0	258710000	23	26			-1	11248000	1840600		9407800	190640000		188700000				8.85437e+07	0	8.06672e+07			-0.0147564	0.425106990014265					-0.134406	0.38780804150454			61.2981	0	80.8149
sp|P33610|PRI2_MOUSE	Prim2	sp|P33610|PRI2_MOUSE	sp|P33610|PRI2_MOUSE	DNA primase large subunit OS=Mus musculus OX=10090 GN=Prim2 PE=1 SV=1	1	6	17	58.408	505	0	79.114	1//0	1//0	1//0	192320000	28	27			-1	6868500	88071	2572000	4208400	16575000	79065000	108240000				6.48061e+06	5.07341e+07	5.76913e+07	2.25403	0.811083123425693	2.70715	0.95435092724679	0.453123	0.698265895953757	2.96875	0.881944444444444	3.15415	0.959792477302205	0.185398	0.663959390862944	2.93306	41.2626	36.151
sp|P33611|DPOA2_MOUSE	Pola2	sp|P33611|DPOA2_MOUSE	sp|P33611|DPOA2_MOUSE	DNA polymerase alpha subunit B OS=Mus musculus OX=10090 GN=Pola2 PE=1 SV=2	1	4	7.8	66.213	600	0	28.556	1//0	1//0	1//0	53542000	27	8			-1	1983000	73224	635190	1274600		17749000	32968000				5.19561e+06	1.33291e+07	1.68495e+07					0.893329	0.795375722543353	1.35922	0.65625	1.69734	0.828793774319066	0.338127	0.691370558375635	2.4386	10.1904	10.9491
sp|P34022|RANG_MOUSE	Ranbp1	sp|P34022|RANG_MOUSE	sp|P34022|RANG_MOUSE	Ran-specific GTPase-activating protein OS=Mus musculus OX=10090 GN=Ranbp1 PE=1 SV=2	1	4	31.5	23.596	203	0	28.879	0//0	1//0	0//0	36521000	6	4			-1	6086800		6086800			43733000		SPL_6027		SPL_6027		2.35327e+07														0	97.6506	0
sp|P34884|MIF_MOUSE	Mif	sp|P34884|MIF_MOUSE	sp|P34884|MIF_MOUSE	Macrophage migration inhibitory factor OS=Mus musculus OX=10090 GN=Mif PE=1 SV=2	1	10	46.1	12.504	115	0	277.89	1//0	1//0	1//0	29867000000	5	164			-1	5973400000	4243400000	579470000	1150500000	93782000000	5652300000	6830200000				5.34143e+10	2.0326e+09	2.81637e+09	-4.0524	0.0151133501259446	-3.77931	0.021398002853067	0.27309	0.648554913294798	-4.71583	0.0115740740740741	-4.24531	0.0181582360570687	0.470516	0.709644670050761	141319	9296.45	9883.03
sp|P35123|UBP4_MOUSE	Usp4	sp|P35123|UBP4_MOUSE;sp|Q8R5H1-5|UBP15_MOUSE;sp|Q8R5H1-2|UBP15_MOUSE;sp|Q8R5H1|UBP15_MOUSE	sp|P35123|UBP4_MOUSE	Ubiquitin carboxyl-terminal hydrolase 4 OS=Mus musculus OX=10090 GN=Usp4 PE=1 SV=3	4	7	13.1	108.34	962	0	51.775	0//0	1//0	1//0	66120000	48	8			-1;-1;-1;-1	1377500		902360	475140		55610000		SPL_6027	SPL_21358			2.62857e+07	1.11657e+07											-1.2352	0.347208121827411	0	14.4766	4.08155
sp|P35235|PTN11_MOUSE	Ptpn11	sp|P35235|PTN11_MOUSE;sp|P35235-1|PTN11_MOUSE	sp|P35235|PTN11_MOUSE;sp|P35235-1|PTN11_MOUSE	Tyrosine-protein phosphatase non-receptor type 11 OS=Mus musculus OX=10090 GN=Ptpn11 PE=1 SV=3;Isoform 2 of Tyrosine-protein phosphatase non-receptor type 11 OS=Mus musculus OX=10090 GN=Ptpn11	2	4	9.4	68.034	593	0	25.215	1//0	0//0	1//0	29456000	39	7			-1;-1	755280	96755		658520	17655000			SPL_M		SPL_21358	9.91668e+06		1.2574e+07									0.342519	0.542153047989624			3.22227	0	5.65682
sp|P35278|RAB5C_MOUSE	Rab5c	sp|P35278|RAB5C_MOUSE	sp|P35278|RAB5C_MOUSE	Ras-related protein Rab-5C OS=Mus musculus OX=10090 GN=Rab5c PE=1 SV=2	1	4	27.3	23.412	216	0	63.332	0//0	1//0	1//0	80794000	11	10			-1	7344900		7186500	158410		102340000	3402200	SPL_6027	SPL_21358			5.83704e+07	853120					-4.91076	0.0358381502890173					-6.09634	0.00913705583756345	0	115.293	1.36077
sp|P35279-2|RAB6A_MOUSE	Rab6a	sp|P35279-2|RAB6A_MOUSE;sp|P35279|RAB6A_MOUSE;sp|P61294|RAB6B_MOUSE;sp|Q8BHD0|RB39A_MOUSE	sp|P35279-2|RAB6A_MOUSE;sp|P35279|RAB6A_MOUSE	Isoform 2 of Ras-related protein Rab-6A OS=Mus musculus OX=10090 GN=Rab6a;Ras-related protein Rab-6A OS=Mus musculus OX=10090 GN=Rab6a PE=1 SV=4	4	7	37.5	23.545	208	0	83.631	1//0	1//0	0//0	228480000	13	18			-1;-1;-1;-1	17576000	137740	17438000		19667000	244130000			SPL_M	SPL_6027	4.70567e+06	1.12361e+08		3.6338	0.909319899244333					4.5776	0.962962962962963					4.5872	279.758	0
sp|P35282|RAB21_MOUSE	Rab21	sp|P35282|RAB21_MOUSE	sp|P35282|RAB21_MOUSE	Ras-related protein Rab-21 OS=Mus musculus OX=10090 GN=Rab21 PE=1 SV=4	1	7	32.9	24.106	222	0	83.785	1//0	1//0	0//0	115160000	13	18			-1	8858300	138950	8719400		6818900	143730000			SPL_M	SPL_6027	4.74698e+06	5.73762e+07		4.39768	0.942065491183879					3.59537	0.914351851851852					4.6275	139.885	0
sp|P35293|RAB18_MOUSE	Rab18	sp|P35293|RAB18_MOUSE	sp|P35293|RAB18_MOUSE	Ras-related protein Rab-18 OS=Mus musculus OX=10090 GN=Rab18 PE=1 SV=2	1	6	39.8	23.035	206	0	131.86	0//0	1//0	0//0	100410000	13	13			-1	7723700		7723700			127590000		SPL_6027		SPL_6027		5.89801e+07														0	123.911	0
sp|P35329|CD22_MOUSE	Cd22	sp|P35329|CD22_MOUSE;sp|P35329-3|CD22_MOUSE;sp|P35329-2|CD22_MOUSE	sp|P35329|CD22_MOUSE;sp|P35329-3|CD22_MOUSE;sp|P35329-2|CD22_MOUSE	B-cell receptor CD22 OS=Mus musculus OX=10090 GN=Cd22 PE=1 SV=1;Isoform 3 of B-cell receptor CD22 OS=Mus musculus OX=10090 GN=Cd22;Isoform 2 of B-cell receptor CD22 OS=Mus musculus OX=10090 GN=Cd22	3	9	18.1	96.581	862	0	128.43	0//0	1//0	0//0	111030000	36	23			-1;-1;-1	3084200		3084200			139920000		SPL_6027		SPL_6027		4.39175e+07														0	49.4799	0
sp|P35459|LY6D_MOUSE	Ly6d	sp|P35459|LY6D_MOUSE	sp|P35459|LY6D_MOUSE	Lymphocyte antigen 6D OS=Mus musculus OX=10090 GN=Ly6d PE=1 SV=1	1	4	48.8	13.395	127	0	146.84	0//0	1//0	0//0	284610000	4	18			-1	71152000		71152000			365470000		SPL_6027		SPL_6027		1.80486e+08														0	1141.49	0
sp|P35527|K1C9_HUMAN	KRT9	sp|P35527|K1C9_HUMAN;CON__sp|P35527|K1C9_HUMAN;sp|P05784|K1C18_MOUSE;sp|Q99456|K1C12_HUMAN;CON__sp|Q99456|K1C12_HUMAN	sp|P35527|K1C9_HUMAN;CON__sp|P35527|K1C9_HUMAN	Keratin, type I cytoskeletal 9 OS=Homo sapiens GN=KRT9 PE=1 SV=3;	5	28	64.7	62.064	623	0	323.31	1//0	1//0	1//0	2324000000	26	112		+	-1;-1;-1;-1;-1	89383000	524470	55504000	33355000	86088000	1698600000	864690000				3.58357e+07	2.28425e+08	2.95277e+08	4.30239	0.939546599496222	3.3283	0.968616262482168	-0.974091	0.373410404624277	2.67225	0.849537037037037	3.0426	0.954604409857328	0.370348	0.698477157360406	17.4666	890.452	286.526
sp|P35550|FBRL_MOUSE	Fbl	sp|P35550|FBRL_MOUSE;sp|Q80WS3|FBLL1_MOUSE	sp|P35550|FBRL_MOUSE	rRNA 2-O-methyltransferase fibrillarin OS=Mus musculus OX=10090 GN=Fbl PE=1 SV=2	2	11	48.6	34.306	327	0	108.85	1//0	1//0	1//0	828020000	20	63			-1;-1	41401000	3750500	20583000	17068000	347700000	456070000	360690000				1.66518e+08	1.78086e+08	1.37228e+08	0.391412	0.516372795969773	0.0529164	0.449358059914408	-0.338496	0.508670520231214	0.0968949	0.44212962962963	-0.279106	0.35538261997406	-0.376001	0.542131979695431	124.904	330.213	146.618
sp|P35564|CALX_MOUSE	Canx	sp|P35564|CALX_MOUSE	sp|P35564|CALX_MOUSE	Calnexin OS=Mus musculus OX=10090 GN=Canx PE=1 SV=1	1	8	19.8	67.277	591	0	75.636	0//0	1//0	1//0	148600000	24	19			-1	6191600		6191600			190090000		SPL_6027	SPL_21358			8.14066e+07	0													0	99.3319	0
sp|P35585|AP1M1_MOUSE	Ap1m1	sp|P35585|AP1M1_MOUSE;sp|Q9WVP1|AP1M2_MOUSE;sp|Q9WVP1-2|AP1M2_MOUSE	sp|P35585|AP1M1_MOUSE	AP-1 complex subunit mu-1 OS=Mus musculus OX=10090 GN=Ap1m1 PE=1 SV=3	3	8	26.7	48.542	423	0	50.223	1//0	1//0	1//0	72326000	25	13			-1;-1;-1	2893000	90799	1883600	918630	11810000	63144000					5.96539e+06	3.36907e+07	1.12439e+07	2.41864	0.831234256926952					2.49766	0.835648148148148	0.914453	0.682230869001297	-1.58321	0.29746192893401	3.02391	30.2186	7.89122
sp|P35700|PRDX1_MOUSE	Prdx1	sp|P35700|PRDX1_MOUSE	sp|P35700|PRDX1_MOUSE	Peroxiredoxin-1 OS=Mus musculus OX=10090 GN=Prdx1 PE=1 SV=1	1	19	70.4	22.176	199	0	174.32	1//0	1//0	1//0	2249100000	14	136			-1	160650000	72729000	30522000	57398000	4288200000	650630000	1059900000				1.00671e+09	1.69358e+08	2.49512e+08	-2.72046	0.0465994962216625	-2.01644	0.0741797432239658	0.704019	0.753757225433526	-2.57151	0.0960648148148148	-2.01248	0.106355382619974	0.559032	0.727918781725888	2422.12	489.665	493.061
sp|P35762|CD81_MOUSE	Cd81	sp|P35762|CD81_MOUSE	sp|P35762|CD81_MOUSE	CD81 antigen OS=Mus musculus OX=10090 GN=Cd81 PE=1 SV=2	1	2	18.2	25.814	236	0	160.66	0//0	1//0	0//0	126310000	7	8			-1	18044000		18044000			159960000		SPL_6027		SPL_6027		9.8167e+07														0	289.48	0
sp|P35821|PTN1_MOUSE	Ptpn1	sp|P35821|PTN1_MOUSE	sp|P35821|PTN1_MOUSE	Tyrosine-protein phosphatase non-receptor type 1 OS=Mus musculus OX=10090 GN=Ptpn1 PE=1 SV=2	1	4	15	49.593	432	0	26.5	0//0	1//0	0//0	48198000	24	5			-1	2008200		2008200			60944000		SPL_6027		SPL_6027		3.30015e+07														0	32.2176	0
sp|P35908|K22E_HUMAN	KRT2	sp|P35908|K22E_HUMAN;CON__sp|P35908|K22E_HUMAN;sp|Q6NXH9|K2C73_MOUSE;sp|Q6IFZ9|K2C74_MOUSE;sp|Q9R0H5|K2C71_MOUSE;sp|O95678|K2C75_HUMAN;CON__sp|O95678|K2C75_HUMAN	sp|P35908|K22E_HUMAN;CON__sp|P35908|K22E_HUMAN	Keratin, type II cytoskeletal 2 epidermal OS=Homo sapiens GN=KRT2 PE=1 SV=2;	7	15	37.9	65.432	639	0	156.97	1//0	1//0	0//1	214260000	39	34		+	-1;-1;-1;-1;-1;-1;-1	5493800	261800	5232000		58217000	250350000			SPL_M	SPL_6027	2.68323e+07	7.17e+07		2.10443	0.797229219143577					1.41801	0.672453703703704					8.71882	83.9371	0
sp|P35979|RL12_MOUSE	Rpl12	sp|P35979|RL12_MOUSE	sp|P35979|RL12_MOUSE	60S ribosomal protein L12 OS=Mus musculus OX=10090 GN=Rpl12 PE=1 SV=2	1	8	60	17.804	165	0	323.31	1//0	1//0	1//0	3631400000	9	89			-1	403490000	100860000	229320000	73313000	3459700000	3032400000	928010000				1.66623e+09	8.8765e+08	2.56518e+08	-0.190187	0.403022670025189	-1.89843	0.0841654778887304	-1.70825	0.255491329479769	-0.908524	0.265046296296296	-2.69946	0.0570687418936446	-1.79093	0.260913705583756	3358.98	3678.98	629.774
sp|P35980|RL18_MOUSE	Rpl18	sp|P35980|RL18_MOUSE	sp|P35980|RL18_MOUSE	60S ribosomal protein L18 OS=Mus musculus OX=10090 GN=Rpl18 PE=1 SV=3	1	10	36.2	21.644	188	0	108.84	1//0	1//0	1//0	458890000	7	35			-1	65555000	10537000	53968000	1050800	361900000	471430000	7294700				1.93834e+08	2.02499e+08	3.60132e+06	0.381452	0.515113350125945	-5.6326	0.00713266761768902	-6.01405	0.0184971098265896	0.0630923	0.435185185185185	-5.75015	0.00778210116731518	-5.81324	0.0121827411167513	350.917	865.81	9.02659
sp|P36371|TAP2_MOUSE	Tap2	sp|P36371|TAP2_MOUSE	sp|P36371|TAP2_MOUSE	Antigen peptide transporter 2 OS=Mus musculus OX=10090 GN=Tap2 PE=1 SV=1	1	9	19.9	77.444	702	0	138.91	0//0	1//0	0//0	272800000	32	25			-1	8525000		8525000			349900000		SPL_6027		SPL_6027		1.0731e+08														0	136.767	0
sp|P36423|THAS_MOUSE	Tbxas1	sp|P36423|THAS_MOUSE	sp|P36423|THAS_MOUSE	Thromboxane-A synthase OS=Mus musculus OX=10090 GN=Tbxas1 PE=1 SV=2	1	5	15	60.39	533	0	31.388	0//0	1//0	0//0	38246000	24	7			-1	1593600		1593600			48965000		SPL_6027		SPL_6027		1.93776e+07														0	25.5662	0
sp|P36536|SAR1A_MOUSE	Sar1a	sp|P36536|SAR1A_MOUSE	sp|P36536|SAR1A_MOUSE	GTP-binding protein SAR1a OS=Mus musculus OX=10090 GN=Sar1a PE=1 SV=1	1	4	45.5	22.371	198	0	78.692	0//0	1//0	0//0	101810000	10	15			-1	10181000		10181000			137210000		SPL_6027		SPL_6027		7.08931e+07														0	163.334	0
sp|P37040|NCPR_MOUSE	Por	sp|P37040|NCPR_MOUSE	sp|P37040|NCPR_MOUSE	NADPH--cytochrome P450 reductase OS=Mus musculus OX=10090 GN=Por PE=1 SV=2	1	14	30.2	77.043	678	0	193.6	0//0	1//0	1//0	194300000	35	29			-1	5551400		5343900	207470		242000000		SPL_6027	SPL_21358			7.01043e+07	3.55525e+06											-4.30148	0.0446700507614213	0	85.7323	1.78221
sp|P38060|HMGCL_MOUSE	Hmgcl	sp|P38060|HMGCL_MOUSE	sp|P38060|HMGCL_MOUSE	Hydroxymethylglutaryl-CoA lyase, mitochondrial OS=Mus musculus OX=10090 GN=Hmgcl PE=1 SV=2	1	11	38.5	34.238	325	0	128.46	1//0	1//0	1//0	145570000	17	43			-1	8563000	4289300	259160	4014500	329390000	7039500	65690000				1.15411e+08	3.42427e+06	3.34137e+07	-5.54818	0.00377833753148615	-2.32605	0.0556348074179743	3.22213	0.988439306358382	-5.07484	0.00694444444444444	-1.78827	0.143968871595331	3.28657	0.968527918781726	142.848	4.15771	34.4854
sp|P38647|GRP75_MOUSE	Hspa9	sp|P38647|GRP75_MOUSE	sp|P38647|GRP75_MOUSE	Stress-70 protein, mitochondrial OS=Mus musculus OX=10090 GN=Hspa9 PE=1 SV=3	1	36	61.4	73.46	679	0	323.31	1//0	1//0	1//0	4276300000	38	206			-1	112530000	4364800	43288000	64881000	956430000	1603500000	2403500000				1.28896e+08	2.49512e+08	4.33446e+08	0.745493	0.602015113350126	1.32941	0.844507845934379	0.583912	0.722543352601156	0.952904	0.590277777777778	1.74965	0.835278858625162	0.796743	0.774619289340101	145.362	694.47	557.341
sp|P39054-2|DYN2_MOUSE	Dnm2	sp|P39054-2|DYN2_MOUSE;sp|P39054|DYN2_MOUSE;sp|P39053-5|DYN1_MOUSE;sp|P39053-3|DYN1_MOUSE;sp|P39053-6|DYN1_MOUSE;sp|P39053-4|DYN1_MOUSE;sp|P39053|DYN1_MOUSE	sp|P39054-2|DYN2_MOUSE;sp|P39054|DYN2_MOUSE	Isoform 2 of Dynamin-2 OS=Mus musculus OX=10090 GN=Dnm2;Dynamin-2 OS=Mus musculus OX=10090 GN=Dnm2 PE=1 SV=2	7	5	6.9	97.732	866	0	38.831	0//0	1//0	0//0	204840000	46	8			-1;-1;-1;-1;-1;-1;-1	4453100		4453100			303090000		SPL_6027		SPL_6027		1.55532e+08														0	71.4412	0
sp|P39087-2|GRIK2_MOUSE	Grik2	sp|P39087-2|GRIK2_MOUSE;sp|P39087|GRIK2_MOUSE	sp|P39087-2|GRIK2_MOUSE;sp|P39087|GRIK2_MOUSE	Isoform GluR6-2 of Glutamate receptor ionotropic, kainate 2 OS=Mus musculus OX=10090 GN=Grik2;Glutamate receptor ionotropic, kainate 2 OS=Mus musculus OX=10090 GN=Grik2 PE=1 SV=4	2	2	3	97.882	869	0.0031315	10.221	0//0	1//0	0//0	34069000	38	3			-1;-1	896560		896560			41142000		SPL_6027		SPL_6027		2.6479e+07														0	14.3835	0
sp|P39655|LOX12_MOUSE	Alox12	sp|P39655|LOX12_MOUSE	sp|P39655|LOX12_MOUSE	Polyunsaturated fatty acid lipoxygenase ALOX12 OS=Mus musculus OX=10090 GN=Alox12 PE=1 SV=4	1	4	9	75.389	663	0	39.434	0//0	1//0	0//0	36162000	36	7			-1	1004500		1004500			46867000		SPL_6027		SPL_6027		2.44779e+07														0	16.1152	0
sp|P39876|TIMP3_MOUSE	Timp3	sp|P39876|TIMP3_MOUSE	sp|P39876|TIMP3_MOUSE	Metalloproteinase inhibitor 3 OS=Mus musculus OX=10090 GN=Timp3 PE=1 SV=1	1	3	15.2	24.182	211	0.0006105	17.421	1//0	0//0	0//0	8426300	11	4			-1	766030	766030			40289000			SPL_M	SPL_M		2.21444e+07															25.5114	0	0
sp|P40124|CAP1_MOUSE	Cap1	sp|P40124|CAP1_MOUSE	sp|P40124|CAP1_MOUSE	Adenylyl cyclase-associated protein 1 OS=Mus musculus OX=10090 GN=Cap1 PE=1 SV=4	1	16	50.8	51.564	474	0	322.13	1//0	1//0	1//0	517600000	27	64			-1	19170000	1546100	5273400	12351000	174940000	174140000	311710000				5.91938e+07	6.4533e+07	1.31637e+08	-0.00661257	0.430730478589421	0.833344	0.738944365192582	0.839957	0.786127167630058	0.124592	0.445601851851852	1.15304	0.731517509727626	1.02845	0.803045685279188	51.4903	84.6012	106.098
sp|P40142|TKT_MOUSE	Tkt	sp|P40142|TKT_MOUSE	sp|P40142|TKT_MOUSE	Transketolase OS=Mus musculus OX=10090 GN=Tkt PE=1 SV=1	1	15	35.6	67.63	623	0	164.14	1//0	1//0	1//0	476420000	29	48			-1	16428000	437630	4764400	11226000	118500000	170250000	223420000				2.9206e+07	5.63134e+07	1.13239e+08	0.522768	0.550377833753149	0.914871	0.7660485021398	0.392104	0.678612716763006	0.947213	0.58912037037037	1.95503	0.858625162127108	1.00782	0.797969543147208	14.5745	76.4354	96.4337
sp|P40336|VP26A_MOUSE	Vps26a	sp|P40336|VP26A_MOUSE;sp|P40336-2|VP26A_MOUSE	sp|P40336|VP26A_MOUSE;sp|P40336-2|VP26A_MOUSE	Vacuolar protein sorting-associated protein 26A OS=Mus musculus OX=10090 GN=Vps26a PE=1 SV=1;Isoform 2 of Vacuolar protein sorting-associated protein 26A OS=Mus musculus OX=10090 GN=Vps26a	2	4	17.1	38.113	327	0	25.255	0//0	1//0	0//0	13905000	18	3			-1;-1	772510		772510			16597000		SPL_6027		SPL_6027		1.08074e+07														0	12.3934	0
sp|P41105|RL28_MOUSE	Rpl28	sp|P41105|RL28_MOUSE	sp|P41105|RL28_MOUSE	60S ribosomal protein L28 OS=Mus musculus OX=10090 GN=Rpl28 PE=1 SV=2	1	13	52.6	15.733	137	0	224.65	1//0	1//0	1//0	3082300000	9	82			-1	342480000	87708000	165710000	89055000	3669400000	1795300000	745740000				1.50242e+09	8.09444e+08	3.92401e+08	-1.03132	0.220403022670025	-2.2988	0.0570613409415121	-1.26748	0.326011560693642	-0.892282	0.266203703703704	-1.93688	0.120622568093385	-1.0446	0.396954314720812	2920.97	2658.49	765.001
sp|P41216|ACSL1_MOUSE	Acsl1	sp|P41216|ACSL1_MOUSE	sp|P41216|ACSL1_MOUSE	Long-chain-fatty-acid--CoA ligase 1 OS=Mus musculus OX=10090 GN=Acsl1 PE=1 SV=2	1	2	5	77.951	699	0.002154	11.614	0//0	1//0	0//0	7561500	37	1			-1	204360		204360			11612000		SPL_6027		SPL_6027		5.87689e+06														0	3.27855	0
sp|P41241|CSK_MOUSE	Csk	sp|P41241|CSK_MOUSE;sp|P41242-3|MATK_MOUSE;sp|P41242|MATK_MOUSE;sp|P41242-2|MATK_MOUSE	sp|P41241|CSK_MOUSE	Tyrosine-protein kinase CSK OS=Mus musculus OX=10090 GN=Csk PE=1 SV=2	4	8	25.6	50.716	450	0	99.872	1//0	1//0	1//0	208950000	27	29			-1;-1;-1;-1	7739000	1981200	1099000	4658800	243930000	40717000	87709000				1.01088e+08	1.87722e+07	6.15853e+07	-2.58276	0.0579345088161209	-1.47567	0.126961483594864	1.10709	0.828901734104046	-2.42894	0.109953703703704	-0.714954	0.276264591439689	1.71399	0.875126903553299	65.9806	17.6313	40.0201
sp|P42208|SEPT2_MOUSE	Septin2	sp|P42208|SEPT2_MOUSE	sp|P42208|SEPT2_MOUSE	Septin-2 OS=Mus musculus OX=10090 GN=Septin2 PE=1 SV=2	1	20	67.3	41.525	361	0	323.31	1//0	1//0	1//0	2705900000	20	134			-1	135300000	4614900	82644000	48037000	551620000	1907400000	909210000				1.02807e+08	4.44866e+08	2.78612e+08	1.78986	0.751889168765743	0.720939	0.69472182596291	-1.06892	0.364161849710983	2.11343	0.783564814814815	1.43832	0.788586251621271	-0.675111	0.474111675126904	153.692	1325.86	412.648
sp|P42209|SEPT1_MOUSE	Septin1	sp|P42209|SEPT1_MOUSE	sp|P42209|SEPT1_MOUSE	Septin-1 OS=Mus musculus OX=10090 GN=Septin1 PE=1 SV=2	1	14	53.3	42.019	366	0	114.32	0//0	1//0	1//0	236840000	23	29			-1	10297000		9976700	320460		293170000	8650300	SPL_6027	SPL_21358			8.46407e+07	3.60861e+06					-5.08284	0.0335260115606936					-4.55184	0.0395939086294416	0	160.056	2.75282
sp|P42225|STAT1_MOUSE	Stat1	sp|P42225|STAT1_MOUSE	sp|P42225|STAT1_MOUSE	Signal transducer and activator of transcription 1 OS=Mus musculus OX=10090 GN=Stat1 PE=1 SV=1	1	19	28.4	87.196	749	0	323.31	1//0	1//0	1//0	604430000	38	66			-1	15906000	1422200	10739000	3745000	315180000	431900000	140570000				8.79337e+07	1.18434e+08	5.53724e+07	0.454521	0.530226700251889	-1.16489	0.169757489300999	-1.61941	0.267052023121387	0.429594	0.482638888888889	-0.667249	0.286640726329442	-1.09684	0.384771573604061	47.364	172.286	32.1703
sp|P42227|STAT3_MOUSE	Stat3	sp|P42227|STAT3_MOUSE;sp|P42227-2|STAT3_MOUSE	sp|P42227|STAT3_MOUSE;sp|P42227-2|STAT3_MOUSE	Signal transducer and activator of transcription 3 OS=Mus musculus OX=10090 GN=Stat3 PE=1 SV=2;Isoform Stat3B of Signal transducer and activator of transcription 3 OS=Mus musculus OX=10090 GN=Stat3	2	35	65.3	88.053	770	0	323.31	1//0	1//0	1//0	1734900000	39	115			-1;-1	44484000	212010	41497000	2775400	43941000	2093600000	94053000				2.1729e+07	3.69061e+08	5.0585e+07	5.57427	0.974811083123426	1.09791	0.803138373751783	-4.47637	0.0473988439306358	4.08617	0.94212962962963	1.21909	0.753566796368353	-2.86708	0.13502538071066	7.06064	665.737	23.8413
sp|P42228|STAT4_MOUSE	Stat4	sp|P42228|STAT4_MOUSE	sp|P42228|STAT4_MOUSE	Signal transducer and activator of transcription 4 OS=Mus musculus OX=10090 GN=Stat4 PE=1 SV=1	1	3	4.9	85.94	749	0	26.209	0//0	1//0	1//0	31032000	35	4			-1	886620		227780	658840		9211200	20067000	SPL_6027	SPL_21358			6.19611e+06	1.12898e+07					1.12336	0.83121387283237					0.865589	0.782741116751269	0	3.65428	5.65957
sp|P42932|TCPQ_MOUSE	Cct8	sp|P42932|TCPQ_MOUSE	sp|P42932|TCPQ_MOUSE	T-complex protein 1 subunit theta OS=Mus musculus OX=10090 GN=Cct8 PE=1 SV=3	1	30	60	59.555	548	0	323.31	1//0	1//0	1//0	2380800000	36	168			-1	66134000	6788400	16119000	43226000	1144600000	623080000	1419400000				1.70964e+08	1.34561e+08	2.76251e+08	-0.877354	0.246851385390428	0.310438	0.554921540656205	1.18779	0.845086705202312	-0.345431	0.359953703703704	0.69229	0.62905317769131	1.03772	0.804060913705584	226.076	258.597	371.32
sp|P43024|CX6A1_MOUSE	Cox6a1	sp|P43024|CX6A1_MOUSE	sp|P43024|CX6A1_MOUSE	Cytochrome c oxidase subunit 6A1, mitochondrial OS=Mus musculus OX=10090 GN=Cox6a1 PE=1 SV=2	1	5	63.1	12.352	111	0	148.76	1//0	1//0	1//0	3144300000	6	67			-1	524040000	17396000	412940000	93707000	544980000	2869700000	541930000				2.74306e+08	1.81427e+09	2.7527e+08	2.39662	0.828715365239295	-0.00809677	0.433666191155492	-2.40472	0.173410404624277	2.72553	0.855324074074074	0.00506223	0.428015564202335	-2.72047	0.151269035532995	579.345	6624.8	804.962
sp|P43274|H14_MOUSE	H1-4	sp|P43274|H14_MOUSE	sp|P43274|H14_MOUSE	Histone H1.4 OS=Mus musculus OX=10090 GN=H1-4 PE=1 SV=2	1	4	37.4	21.977	219	0	35.36	1//0	1//0	1//0	228420000	10	21			-1	22842000	13778000	9064700		625380000	137200000					3.51379e+08	7.04514e+07	0	-2.18845	0.0793450881612091					-2.31833	0.118055555555556					458.854	145.425	0
sp|P43275|H11_MOUSE	H1-1	sp|P43275|H11_MOUSE	sp|P43275|H11_MOUSE	Histone H1.1 OS=Mus musculus OX=10090 GN=H1-1 PE=1 SV=2	1	5	30.5	21.785	213	0	91.717	1//0	1//0	1//0	530870000	7	40			-1	75838000	31835000	17108000	26895000	955630000	160840000	220830000				5.33361e+08	9.30772e+07	9.21737e+07	-2.57083	0.0604534005037783	-2.11352	0.0670470756062767	0.45731	0.699421965317919	-2.51861	0.101851851851852	-2.53269	0.0687418936446174	-0.0140723	0.616243654822335	1060.21	274.464	231.034
sp|P43276|H15_MOUSE	H1-5	sp|P43276|H15_MOUSE	sp|P43276|H15_MOUSE	Histone H1.5 OS=Mus musculus OX=10090 GN=H1-5 PE=1 SV=2	1	6	34.1	22.576	223	0	55.651	1//0	1//0	1//0	295620000	9	30			-1	32847000	16998000	11330000	4519000	711840000	119230000	49181000				3.54631e+08	7.40288e+07	1.99122e+07	-2.57781	0.0591939546599496	-3.85538	0.0185449358059914	-1.27757	0.322543352601156	-2.26016	0.122685185185185	-4.15459	0.0207522697795071	-1.89443	0.244670050761421	566.09	181.767	38.8191
sp|P43277|H13_MOUSE	H1-3	sp|P43277|H13_MOUSE	sp|P43277|H13_MOUSE	Histone H1.3 OS=Mus musculus OX=10090 GN=H1-3 PE=1 SV=2	1	14	37.1	22.099	221	0	143.6	1//0	1//0	1//0	3131000000	11	95			-1	284640000	81140000	74661000	128840000	3974700000	1073900000	1249700000				1.42913e+09	3.99751e+08	5.08258e+08	-1.88799	0.103274559193955	-1.66926	0.10413694721826	0.218722	0.639306358381503	-1.83796	0.159722222222222	-1.49151	0.175097276264591	0.346458	0.693401015228426	2702.23	1197.79	1106.76
sp|P46061|RAGP1_MOUSE	Rangap1	sp|P46061|RAGP1_MOUSE	sp|P46061|RAGP1_MOUSE	Ran GTPase-activating protein 1 OS=Mus musculus OX=10090 GN=Rangap1 PE=1 SV=2	1	5	17	63.53	589	0	42.766	1//0	1//0	1//0	14534000	28	7			-1	519070	53282	465790			17864000					3.92066e+06	1.01365e+07	0							1.37039	0.659722222222222					1.77447	7.47268	0
sp|P46414|CDN1B_MOUSE	Cdkn1b	sp|P46414|CDN1B_MOUSE	sp|P46414|CDN1B_MOUSE	Cyclin-dependent kinase inhibitor 1B OS=Mus musculus OX=10090 GN=Cdkn1b PE=1 SV=2	1	6	37.1	22.193	197	0	53.853	1//0	1//0	1//0	221840000	12	20			-1	18487000	1951800	5784700	10750000	104890000	81449000	123300000				5.47037e+07	5.39518e+07	6.31601e+07	-0.364908	0.36272040302267	0.233296	0.51925820256776	0.598204	0.728323699421965	-0.019967	0.422453703703704	0.207374	0.486381322957198	0.227341	0.674111675126904	65.0015	92.804	92.3447
sp|P46460|NSF_MOUSE	Nsf	sp|P46460|NSF_MOUSE	sp|P46460|NSF_MOUSE	Vesicle-fusing ATPase OS=Mus musculus OX=10090 GN=Nsf PE=1 SV=2	1	10	21.2	82.613	744	0	112.33	1//0	1//0	1//0	107730000	43	22			-1	2505300	60931	1573200	871160	12522000	93863000	21729000				6.88535e+06	3.49928e+07	1.83403e+07	2.90609	0.86272040302267	0.795157	0.720399429386591	-2.11093	0.204624277456647	2.34546	0.8125	1.41342	0.783398184176394	-0.932042	0.424365482233503	2.02921	25.2389	7.48344
sp|P46471|PRS7_MOUSE	Psmc2	sp|P46471|PRS7_MOUSE	sp|P46471|PRS7_MOUSE	26S proteasome regulatory subunit 7 OS=Mus musculus OX=10090 GN=Psmc2 PE=1 SV=5	1	22	62.8	48.647	433	0	323.31	1//0	1//0	1//0	861820000	26	97			-1	33147000	1135300	19782000	12229000	188930000	570870000	308540000				4.21092e+07	1.23117e+08	8.46537e+07	1.59531	0.724181360201511	0.707606	0.689015691868759	-0.887705	0.388439306358381	1.54782	0.696759259259259	1.00744	0.697795071335927	-0.540381	0.503553299492386	37.8093	317.363	105.05
sp|P46638|RB11B_MOUSE	Rab11b	sp|P46638|RB11B_MOUSE;sp|P62492|RB11A_MOUSE;sp|Q9WTL2|RAB25_MOUSE	sp|P46638|RB11B_MOUSE;sp|P62492|RB11A_MOUSE	Ras-related protein Rab-11B OS=Mus musculus OX=10090 GN=Rab11b PE=1 SV=3;Ras-related protein Rab-11A OS=Mus musculus OX=10090 GN=Rab11a PE=1 SV=3	3	13	57.3	24.489	218	0	323.31	0//0	1//0	0//0	535800000	15	28			-1;-1;-1	35720000		35720000			700930000		SPL_6027		SPL_6027		2.38854e+08														0	573.057	0
sp|P46664|PURA2_MOUSE	Adss2	sp|P46664|PURA2_MOUSE;sp|P28650|PURA1_MOUSE;sp|P28650-2|PURA1_MOUSE	sp|P46664|PURA2_MOUSE	Adenylosuccinate synthetase isozyme 2 OS=Mus musculus OX=10090 GN=Adss2 PE=1 SV=2	3	3	7.5	50.02	456	0	18.434	1//0	0//0	1//0	37675000	20	6			-1;-1;-1	1883800	221590		1662200	21137000			SPL_M		SPL_21358	1.16465e+07		1.62756e+07									0.482814	0.582360570687419			7.37969	0	14.2786
sp|P46718|PDCD2_MOUSE	Pdcd2	sp|P46718|PDCD2_MOUSE	sp|P46718|PDCD2_MOUSE	Programmed cell death protein 2 OS=Mus musculus OX=10090 GN=Pdcd2 PE=2 SV=2	1	12	45.5	38.341	343	0	109.23	1//0	1//0	1//0	527180000	19	59			-1	27746000	1529300	10989000	15229000	183820000	217690000	249420000				5.71645e+07	8.15878e+07	8.625e+07	0.243981	0.492443324937028	0.440283	0.600570613409415	0.196302	0.63121387283237	0.513235	0.497685185185185	0.593406	0.610894941634241	0.0801708	0.642639593908629	50.9308	176.297	130.82
sp|P46737|BRCC3_MOUSE	Brcc3	sp|P46737|BRCC3_MOUSE	sp|P46737|BRCC3_MOUSE	Lys-63-specific deubiquitinase BRCC36 OS=Mus musculus OX=10090 GN=Brcc3 PE=1 SV=1	1	2	7.9	33.34	291	0.0011416	13.695	0//0	1//0	0//0	18721000	16	2			-1	1170100		1170100			24522000		SPL_6027		SPL_6027		1.455e+07														0	18.7719	0
sp|P46978|STT3A_MOUSE	Stt3a	sp|P46978|STT3A_MOUSE	sp|P46978|STT3A_MOUSE	Dolichyl-diphosphooligosaccharide--protein glycosyltransferase subunit STT3A OS=Mus musculus OX=10090 GN=Stt3a PE=1 SV=1	1	13	15.5	80.597	705	0	245.02	0//0	1//0	1//0	587190000	31	42			-1	18942000		18354000	587770		708640000	20349000	SPL_6027	SPL_21358			2.05708e+08	8.92092e+06					-5.12202	0.0323699421965318					-4.52726	0.0406091370558376	0	294.454	5.04907
sp|P47738|ALDH2_MOUSE	Aldh2	sp|P47738|ALDH2_MOUSE;sp|Q9JHW9|AL1A3_MOUSE;sp|Q62148|AL1A2_MOUSE	sp|P47738|ALDH2_MOUSE	Aldehyde dehydrogenase, mitochondrial OS=Mus musculus OX=10090 GN=Aldh2 PE=1 SV=1	3	25	56.8	56.537	519	0	323.31	1//0	1//0	1//0	2908400000	23	139			-1;-1;-1	126450000	301380	54385000	71764000	32892000	1482200000	1534700000				1.82168e+07	2.39884e+08	3.48173e+08	5.49386	0.972292191435768	5.54408	0.998573466476462	0.0502165	0.596531791907514	3.719	0.920138888888889	4.25646	0.98313878080415	0.537465	0.723857868020305	10.037	872.5	616.468
sp|P47740|AL3A2_MOUSE	Aldh3a2	sp|P47740|AL3A2_MOUSE;sp|P47739|AL3A1_MOUSE	sp|P47740|AL3A2_MOUSE	Aldehyde dehydrogenase family 3 member A2 OS=Mus musculus OX=10090 GN=Aldh3a2 PE=1 SV=2	2	22	49.6	53.97	484	0	318.25	0//0	1//0	1//0	2674400000	19	92			-1;-1	140760000		130930000	9827800		3203600000	167590000	SPL_6027	SPL_21358			6.06019e+08	6.57224e+07					-4.25669	0.0554913294797688					-3.20491	0.104568527918782	0	2100.51	84.4228
sp|P47753|CAZA1_MOUSE	Capza1	sp|P47753|CAZA1_MOUSE	sp|P47753|CAZA1_MOUSE	F-actin-capping protein subunit alpha-1 OS=Mus musculus OX=10090 GN=Capza1 PE=1 SV=4	1	10	69.6	32.939	286	0	323.31	1//0	1//0	1//0	1347600000	13	81			-1	103660000	7607500	49684000	46373000	557480000	652140000	580130000				1.50671e+08	2.94575e+08	1.80864e+08	0.226262	0.48992443324937	0.0574562	0.450784593437946	-0.168805	0.551445086705202	0.967231	0.592592592592593	0.263499	0.508430609597925	-0.703732	0.46497461928934	253.355	797.081	398.354
sp|P47754|CAZA2_MOUSE	Capza2	sp|P47754|CAZA2_MOUSE	sp|P47754|CAZA2_MOUSE	F-actin-capping protein subunit alpha-2 OS=Mus musculus OX=10090 GN=Capza2 PE=1 SV=3	1	16	79	32.967	286	0	323.31	1//0	1//0	1//0	2356900000	13	108			-1	181300000	20634000	54037000	106630000	1090600000	945100000	1285000000				4.45328e+08	3.636e+08	4.07215e+08	-0.206583	0.399244332493703	0.236646	0.520684736091298	0.443229	0.694797687861272	-0.292516	0.37037037037037	-0.129079	0.390402075226978	0.163437	0.65989847715736	687.181	866.917	915.974
sp|P47757-2|CAPZB_MOUSE	Capzb	sp|P47757-2|CAPZB_MOUSE;sp|P47757-4|CAPZB_MOUSE;sp|P47757|CAPZB_MOUSE	sp|P47757-2|CAPZB_MOUSE;sp|P47757-4|CAPZB_MOUSE;sp|P47757|CAPZB_MOUSE	Isoform 2 of F-actin-capping protein subunit beta OS=Mus musculus OX=10090 GN=Capzb;Isoform 3 of F-actin-capping protein subunit beta OS=Mus musculus OX=10090 GN=Capzb;F-actin-capping protein subunit beta OS=Mus musculus OX=10090 GN=Capzb PE=1 SV=3	3	16	72.8	30.628	272	0	238.74	1//0	1//0	1//0	1656200000	16	143			-1;-1;-1	103510000	10679000	44593000	48241000	887420000	638560000	819260000				1.79702e+08	2.3979e+08	2.11721e+08	-0.474795	0.336272040302267	-0.115296	0.396576319543509	0.359499	0.668208092485549	0.416166	0.481481481481481	0.236558	0.490272373540856	-0.179607	0.585786802030457	355.646	715.406	414.4
sp|P47758|SRPRB_MOUSE	Srprb	sp|P47758|SRPRB_MOUSE	sp|P47758|SRPRB_MOUSE	Signal recognition particle receptor subunit beta OS=Mus musculus OX=10090 GN=Srprb PE=1 SV=1	1	10	45.4	29.579	269	0	123.86	0//0	1//0	0//0	207630000	16	19			-1	12977000		12977000			273140000		SPL_6027		SPL_6027		8.00232e+07														0	208.19	0
sp|P47856-2|GFPT1_MOUSE	Gfpt1	sp|P47856-2|GFPT1_MOUSE;sp|P47856|GFPT1_MOUSE;sp|Q9Z2Z9|GFPT2_MOUSE	sp|P47856-2|GFPT1_MOUSE;sp|P47856|GFPT1_MOUSE	Isoform 2 of Glutamine--fructose-6-phosphate aminotransferase [isomerizing] 1 OS=Mus musculus OX=10090 GN=Gfpt1;Glutamine--fructose-6-phosphate aminotransferase [isomerizing] 1 OS=Mus musculus OX=10090 GN=Gfpt1 PE=1 SV=3	3	10	19.7	76.722	681	0	72.506	1//0	1//0	1//0	108560000	42	20			-1;-1;-1	2584800	166780	1411100	1007000	47556000	55997000	41045000				1.84081e+07	2.71756e+07	2.0706e+07	0.235722	0.491183879093199	-0.212421	0.370898716119829	-0.448143	0.486705202312139	0.561969	0.50462962962963	0.169703	0.473411154345006	-0.392266	0.537055837563452	5.55433	22.6383	8.65034
sp|P47911|RL6_MOUSE	Rpl6	sp|P47911|RL6_MOUSE	sp|P47911|RL6_MOUSE	60S ribosomal protein L6 OS=Mus musculus OX=10090 GN=Rpl6 PE=1 SV=3	1	12	40.9	33.509	296	0	113.69	1//0	1//0	1//0	623550000	15	54			-1	41570000	3815200	31232000	6523100	320150000	492280000	153500000				9.50208e+07	1.603e+08	4.47038e+07	0.620731	0.573047858942065	-1.06051	0.186875891583452	-1.68124	0.260115606936416	0.754459	0.549768518518518	-1.08785	0.224383916990921	-1.84231	0.252791878172589	127.059	501.056	56.0348
sp|P47915|RL29_MOUSE	Rpl29	sp|P47915|RL29_MOUSE	sp|P47915|RL29_MOUSE	60S ribosomal protein L29 OS=Mus musculus OX=10090 GN=Rpl29 PE=1 SV=2	1	9	41.2	17.587	160	0	107.39	1//0	1//0	1//0	1332600000	7	40			-1	190370000	76859000	42511000	70997000	2139200000	438600000	721880000				1.29051e+09	1.59563e+08	2.38258e+08	-2.28609	0.0743073047858942	-1.56724	0.119828815977175	0.718853	0.758381502890173	-3.01574	0.0543981481481481	-2.43734	0.0752269779507134	0.578402	0.72994923857868	2559.66	682.005	609.879
sp|P47941|CRKL_MOUSE	Crkl	sp|P47941|CRKL_MOUSE	sp|P47941|CRKL_MOUSE	Crk-like protein OS=Mus musculus OX=10090 GN=Crkl PE=1 SV=2	1	14	61.4	33.83	303	0	102.43	1//0	1//0	0//0	176560000	15	36			-1	11771000	8225000	3545500		557880000	89720000			SPL_M	SPL_6027	1.65272e+08	3.79458e+07		-2.63645	0.0503778337531486					-2.12283	0.134259259259259					273.92	56.8805	0
sp|P47955|RLA1_MOUSE	Rplp1	sp|P47955|RLA1_MOUSE	sp|P47955|RLA1_MOUSE	60S acidic ribosomal protein P1 OS=Mus musculus OX=10090 GN=Rplp1 PE=1 SV=1	1	5	94.7	11.475	114	0	131.04	1//0	1//0	1//0	358530000	3	32			-1	119510000	31613000	71945000	15953000	439490000	276840000	42246000				2.30547e+08	1.60307e+08	2.34315e+07	-0.666778	0.290931989924433	-3.37894	0.0271041369472183	-2.71217	0.143352601156069	-0.52422	0.328703703703704	-3.29854	0.0402075226977951	-2.77432	0.143147208121827	1052.82	1154.21	137.04
sp|P47962|RL5_MOUSE	Rpl5	sp|P47962|RL5_MOUSE	sp|P47962|RL5_MOUSE	60S ribosomal protein L5 OS=Mus musculus OX=10090 GN=Rpl5 PE=1 SV=3	1	9	35	34.4	297	0	79.534	1//0	1//0	1//0	384280000	11	28			-1	34934000	1299800	31653000	1981300	70032000	432050000	26881000				3.75751e+07	1.5188e+08	1.06701e+07	2.62511	0.845088161209068	-1.38143	0.138373751783167	-4.00654	0.0751445086705202	2.01508	0.763888888888889	-1.81621	0.138780804150454	-3.83129	0.0639593908629442	43.2877	507.81	17.0198
sp|P47963|RL13_MOUSE	Rpl13	sp|P47963|RL13_MOUSE	sp|P47963|RL13_MOUSE	60S ribosomal protein L13 OS=Mus musculus OX=10090 GN=Rpl13 PE=1 SV=3	1	16	57.8	24.305	211	0	323.31	1//0	1//0	1//0	15602000000	10	158			-1	1560200000	368700000	862090000	329380000	16295000000	10710000000	3982200000				5.93465e+09	4.19873e+09	1.12118e+09	-0.605471	0.308564231738035	-2.03279	0.072753209700428	-1.42732	0.297109826589595	-0.499209	0.334490740740741	-2.40415	0.0765239948119326	-1.90494	0.242639593908629	12278.9	13830.5	2829.44
sp|P47964|RL36_MOUSE	Rpl36	sp|P47964|RL36_MOUSE	sp|P47964|RL36_MOUSE	60S ribosomal protein L36 OS=Mus musculus OX=10090 GN=Rpl36 PE=1 SV=2	1	3	19	12.215	105	0	23.129	1//0	1//0	1//0	193220000	3	12			-1	64407000	15015000	49392000		224290000	171710000					1.18382e+08	1.15164e+08	0	-0.385391	0.358942065491184					-0.0397688	0.416666666666667					500.05	792.397	0
sp|P48025|KSYK_MOUSE	Syk	sp|P48025|KSYK_MOUSE	sp|P48025|KSYK_MOUSE	Tyrosine-protein kinase SYK OS=Mus musculus OX=10090 GN=Syk PE=1 SV=2	1	3	7	71.376	629	0	22.125	0//0	1//0	1//0	44219000	35	5			-1	1263400		728200	535190		30767000		SPL_6027	SPL_21358			1.9809e+07	9.17096e+06											-1.11101	0.380710659898477	0	11.6825	4.59739
sp|P48410|ABCD1_MOUSE	Abcd1	sp|P48410|ABCD1_MOUSE	sp|P48410|ABCD1_MOUSE	ATP-binding cassette sub-family D member 1 OS=Mus musculus OX=10090 GN=Abcd1 PE=1 SV=1	1	6	13.2	81.858	736	0	42.375	0//0	1//0	0//0	31001000	34	6			-1	911790		911790			38610000		SPL_6027		SPL_6027		1.94139e+07														0	14.6279	0
sp|P48771|CX7A2_MOUSE	Cox7a2	sp|P48771|CX7A2_MOUSE	sp|P48771|CX7A2_MOUSE	Cytochrome c oxidase subunit 7A2, mitochondrial OS=Mus musculus OX=10090 GN=Cox7a2 PE=1 SV=2	1	4	60.2	9.2908	83	0	116.03	1//0	1//0	1//0	1202500000	4	31			-1	300620000	9059800	242880000	48675000	313700000	944230000	337960000				9.52363e+07	7.41447e+08	9.53242e+07	1.58975	0.721662468513854	0.107467	0.463623395149786	-1.48229	0.286705202312139	2.96076	0.87962962962963	0.0013309	0.426718547341115	-2.95943	0.121827411167513	301.722	3896.53	418.128
sp|P48962|ADT1_MOUSE	Slc25a4	sp|P48962|ADT1_MOUSE	sp|P48962|ADT1_MOUSE	ADP/ATP translocase 1 OS=Mus musculus OX=10090 GN=Slc25a4 PE=1 SV=4	1	10	56	32.904	298	0	96.57	1//0	1//0	0//1	338530000	21	25			-1	16121000	188910	15932000		21920000	425310000			SPL_M	SPL_6027	1.04253e+07	1.61096e+08		4.2782	0.938287153652393					3.94976	0.930555555555556					6.29134	255.597	0
sp|P49222|EPB42_MOUSE	Epb42	sp|P49222|EPB42_MOUSE	sp|P49222|EPB42_MOUSE	Protein 4.2 OS=Mus musculus OX=10090 GN=Epb42 PE=1 SV=3	1	5	7.7	76.755	691	0	31.513	0//0	1//0	1//0	66768000	34	6			-1	1963800		474410	1489400			43502000	SPL_6027	SPL_21358			1.25367e+07	2.47919e+07											0.983708	0.795939086294416	0	7.61097	12.7943
sp|P49717|MCM4_MOUSE	Mcm4	sp|P49717|MCM4_MOUSE;sp|Q9CWV1-2|MCM8_MOUSE;sp|Q9CWV1|MCM8_MOUSE	sp|P49717|MCM4_MOUSE	DNA replication licensing factor MCM4 OS=Mus musculus OX=10090 GN=Mcm4 PE=1 SV=1	3	36	61.4	96.735	862	0	323.31	0//0	1//0	1//0	1943400000	43	119			-1;-1;-1	45196000		33606000	11589000		1815400000	491600000	SPL_6027	SPL_21358			3.3819e+08	2.26689e+08					-1.88473	0.226589595375723					-0.577119	0.496446700507614	0	539.142	99.5519
sp|P49718|MCM5_MOUSE	Mcm5	sp|P49718|MCM5_MOUSE	sp|P49718|MCM5_MOUSE	DNA replication licensing factor MCM5 OS=Mus musculus OX=10090 GN=Mcm5 PE=1 SV=2	1	29	54.1	82.406	734	0	323.31	1//0	1//0	1//0	3240600000	40	165			-1	81015000	2814700	22131000	56070000	833510000	1124400000	1629200000				1.41495e+08	2.32184e+08	3.96188e+08	0.431884	0.525188916876574	0.966892	0.777460770328103	0.535008	0.715606936416185	0.714517	0.539351851851852	1.48543	0.797665369649806	0.770918	0.766497461928934	93.7389	355.048	481.653
sp|P49722|PSA2_MOUSE	Psma2	sp|P49722|PSA2_MOUSE	sp|P49722|PSA2_MOUSE	Proteasome subunit alpha type-2 OS=Mus musculus OX=10090 GN=Psma2 PE=1 SV=3	1	8	52.1	25.926	234	0	77.365	0//0	1//0	1//0	110610000	10	19			-1	11061000		7058600	4002000		71075000	54090000	SPL_6027	SPL_21358			3.32439e+07	1.95937e+07					-0.39398	0.499421965317919					-0.762704	0.451776649746193	0	113.241	34.378
sp|P49817|CAV1_MOUSE	Cav1	sp|P49817|CAV1_MOUSE;sp|P49817-2|CAV1_MOUSE;sp|P51637|CAV3_MOUSE	sp|P49817|CAV1_MOUSE;sp|P49817-2|CAV1_MOUSE;sp|P51637|CAV3_MOUSE	Caveolin-1 OS=Mus musculus OX=10090 GN=Cav1 PE=1 SV=1;Isoform 2 of Caveolin-1 OS=Mus musculus OX=10090 GN=Cav1;Caveolin-3 OS=Mus musculus OX=10090 GN=Cav3 PE=1 SV=1	3	2	10.7	20.538	178	0.0021763	11.925	0//0	1//0	0//0	66025000	10	3			-1;-1;-1	6602500		6602500			83708000		SPL_6027		SPL_6027		5.13151e+07														0	105.924	0
sp|P50096|IMDH1_MOUSE	Impdh1	sp|P50096|IMDH1_MOUSE	sp|P50096|IMDH1_MOUSE	Inosine-5-monophosphate dehydrogenase 1 OS=Mus musculus OX=10090 GN=Impdh1 PE=1 SV=2	1	6	20.4	55.278	514	0	56.313	1//0	1//0	1//0	92434000	20	7			-1	4621700	378660	154500	4088600			66299000				1.99017e+07	2.40159e+06	4.00347e+07							-3.05083	0.0486111111111111	1.00836	0.699092088197147	4.05919	0.987817258883249	12.6106	2.47865	35.1219
sp|P50171|DHB8_MOUSE	Hsd17b8	sp|P50171|DHB8_MOUSE;sp|P50171-2|DHB8_MOUSE	sp|P50171|DHB8_MOUSE;sp|P50171-2|DHB8_MOUSE	Estradiol 17-beta-dehydrogenase 8 OS=Mus musculus OX=10090 GN=Hsd17b8 PE=1 SV=2;Isoform Long of Estradiol 17-beta-dehydrogenase 8 OS=Mus musculus OX=10090 GN=Hsd17b8	2	2	9.7	26.588	259	0.00060827	17.241	0//0	1//0	1//0	21939000	12	5			-1;-1	1828200		751730	1076500			11408000	SPL_6027	SPL_21358			7.01108e+06	6.32459e+06											-0.148663	0.591878172588832	0	12.06	9.24736
sp|P50172|DHI1_MOUSE	Hsd11b1	sp|P50172|DHI1_MOUSE	sp|P50172|DHI1_MOUSE	Corticosteroid 11-beta-dehydrogenase isozyme 1 OS=Mus musculus OX=10090 GN=Hsd11b1 PE=1 SV=3	1	4	15.1	32.364	292	0	31.634	0//0	1//0	0//0	50347000	18	9			-1	2797000		2797000			64979000		SPL_6027		SPL_6027		3.17317e+07														0	44.8723	0
sp|P50247|SAHH_MOUSE	Ahcy	sp|P50247|SAHH_MOUSE	sp|P50247|SAHH_MOUSE	Adenosylhomocysteinase OS=Mus musculus OX=10090 GN=Ahcy PE=1 SV=3	1	6	17.1	47.688	432	0	88.311	0//0	1//0	1//0	130260000	26	14			-1	5009800		1965600	3044200		65828000	70008000	SPL_6027	SPL_21358			3.70805e+07	3.87507e+07					0.0888184	0.604624277456647					0.0635619	0.638578680203046	0	31.5342	26.1503
sp|P50431|GLYC_MOUSE	Shmt1	sp|P50431|GLYC_MOUSE;sp|Q9CZN7-2|GLYM_MOUSE;sp|Q9CZN7|GLYM_MOUSE	sp|P50431|GLYC_MOUSE	Serine hydroxymethyltransferase, cytosolic OS=Mus musculus OX=10090 GN=Shmt1 PE=1 SV=3	3	3	10	52.6	478	0.00060459	16.642	1//0	1//0	0//0	4458200	25	3			-1;-1;-1	178330	178330			19858000				SPL_M	SPL_6027	1.17161e+07	0														5.93899	0	0
sp|P50516|VATA_MOUSE	Atp6v1a	sp|P50516|VATA_MOUSE;sp|P50516-2|VATA_MOUSE	sp|P50516|VATA_MOUSE;sp|P50516-2|VATA_MOUSE	V-type proton ATPase catalytic subunit A OS=Mus musculus OX=10090 GN=Atp6v1a PE=1 SV=2;Isoform 2 of V-type proton ATPase catalytic subunit A OS=Mus musculus OX=10090 GN=Atp6v1a	2	23	48.6	68.325	617	0	323.31	1//0	1//0	1//0	524720000	33	84			-1;-1	15901000	874250	10861000	4165200	165100000	354130000	206240000				5.68177e+07	9.71567e+07	4.45436e+07	1.10094	0.663727959697733	0.320984	0.559201141226819	-0.779955	0.408092485549133	0.773974	0.553240740740741	-0.35112	0.342412451361868	-1.12509	0.379695431472081	29.1155	174.243	35.7799
sp|P50518|VATE1_MOUSE	Atp6v1e1	sp|P50518|VATE1_MOUSE;sp|Q9D593|VATE2_MOUSE	sp|P50518|VATE1_MOUSE	V-type proton ATPase subunit E 1 OS=Mus musculus OX=10090 GN=Atp6v1e1 PE=1 SV=2	2	9	43.8	26.157	226	0	134.38	1//0	1//0	1//0	381070000	13	33			-1;-1	29313000	923660	8801700	19588000	81714000	156360000	181740000				3.15563e+07	6.34992e+07	1.2467e+08	0.936216	0.636020151133501	1.15322	0.808844507845934	0.217004	0.638150289017341	1.00881	0.601851851851852	1.98212	0.861219195849546	0.973308	0.792893401015228	30.761	141.206	168.265
sp|P50543|S10AB_MOUSE	S100a11	sp|P50543|S10AB_MOUSE	sp|P50543|S10AB_MOUSE	Protein S100-A11 OS=Mus musculus OX=10090 GN=S100a11 PE=1 SV=1	1	7	84.7	11.083	98	0	132.26	1//0	1//0	1//0	493830000	5	28			-1	98766000	2348900	34889000	61528000	63902000	189520000	301000000				3.08649e+07	1.1822e+08	1.5062e+08	1.56842	0.720403022670025	2.23583	0.935805991440799	0.667413	0.744508670520231	1.93743	0.75	2.28688	0.894941634241245	0.349442	0.694416243654822	78.2262	559.725	528.538
sp|P50544|ACADV_MOUSE	Acadvl	sp|P50544|ACADV_MOUSE	sp|P50544|ACADV_MOUSE	Very long-chain specific acyl-CoA dehydrogenase, mitochondrial OS=Mus musculus OX=10090 GN=Acadvl PE=1 SV=3	1	29	55.2	70.875	656	0	323.31	0//0	1//0	1//0	1047200000	40	91			-1	26179000		15189000	10990000		640370000	521280000	SPL_6027	SPL_21358			1.76505e+08	1.13339e+08					-0.296847	0.521387283236994					-0.639067	0.483248730964467	0	243.677	94.4064
sp|P50637|TSPO_MOUSE	Tspo	sp|P50637|TSPO_MOUSE	sp|P50637|TSPO_MOUSE	Translocator protein OS=Mus musculus OX=10090 GN=Tspo PE=1 SV=1	1	6	34.9	18.841	169	0	197.45	0//0	1//0	0//0	130220000	6	11			-1	21704000		21704000			175530000		SPL_6027		SPL_6027		7.73923e+07														0	348.198	0
sp|P51125-7|ICAL_MOUSE	Cast	sp|P51125-7|ICAL_MOUSE;sp|P51125-3|ICAL_MOUSE;sp|P51125-2|ICAL_MOUSE;sp|P51125-6|ICAL_MOUSE;sp|P51125|ICAL_MOUSE;sp|P51125-5|ICAL_MOUSE;sp|P51125-4|ICAL_MOUSE	sp|P51125-7|ICAL_MOUSE;sp|P51125-3|ICAL_MOUSE;sp|P51125-2|ICAL_MOUSE;sp|P51125-6|ICAL_MOUSE;sp|P51125|ICAL_MOUSE;sp|P51125-5|ICAL_MOUSE;sp|P51125-4|ICAL_MOUSE	Isoform 7 of Calpastatin OS=Mus musculus OX=10090 GN=Cast;Isoform 3 of Calpastatin OS=Mus musculus OX=10090 GN=Cast;Isoform 2 of Calpastatin OS=Mus musculus OX=10090 GN=Cast;Isoform 6 of Calpastatin OS=Mus musculus OX=10090 GN=Cast;Calpastatin OS=Mus muscu	7	2	4.4	76.607	705	0.0011293	13.135	0//0	1//0	0//0	17661000	33	3			-1;-1;-1;-1;-1;-1;-1	535190		535190			19074000		SPL_6027		SPL_6027		1.37264e+07														0	8.58606	0
sp|P51150|RAB7A_MOUSE	Rab7a	sp|P51150|RAB7A_MOUSE	sp|P51150|RAB7A_MOUSE	Ras-related protein Rab-7a OS=Mus musculus OX=10090 GN=Rab7a PE=1 SV=2	1	17	79.7	23.489	207	0	257.43	0//0	1//0	0//0	464980000	14	32			-1	33213000		33213000			591400000		SPL_6027		SPL_6027		1.72104e+08														0	532.837	0
sp|P51174|ACADL_MOUSE	Acadl	sp|P51174|ACADL_MOUSE	sp|P51174|ACADL_MOUSE	Long-chain specific acyl-CoA dehydrogenase, mitochondrial OS=Mus musculus OX=10090 GN=Acadl PE=1 SV=2	1	2	9.3	47.907	430	0.0011744	15.006	0//0	1//0	1//0	12774000	21	4			-1	608290		307500	300780		7660700		SPL_6027	SPL_21358			5.01893e+06	3.09248e+06											-0.698614	0.469035532994924	0	4.93323	2.58376
sp|P51175|PPOX_MOUSE	Ppox	sp|P51175|PPOX_MOUSE	sp|P51175|PPOX_MOUSE	Protoporphyrinogen oxidase OS=Mus musculus OX=10090 GN=Ppox PE=1 SV=1	1	3	12.8	50.87	477	0	21.337	1//0	1//0	0//0	18425000	26	4			-1	708640	115870	592770		18376000	14292000			SPL_M	SPL_6027	7.91707e+06	1.19785e+07		-0.362615	0.363979848866499					0.597406	0.512731481481482					3.85886	9.50982	0
sp|P51410|RL9_MOUSE	Rpl9	sp|P51410|RL9_MOUSE	sp|P51410|RL9_MOUSE	60S ribosomal protein L9 OS=Mus musculus OX=10090 GN=Rpl9 PE=1 SV=2	1	7	60.4	21.881	192	0	152.51	1//0	1//0	1//0	453530000	9	35			-1	50392000	8774700	34687000	6930000	409910000	357500000	62581000				2.07537e+08	1.74913e+08	3.05361e+07	-0.197364	0.40176322418136	-2.71151	0.0399429386590585	-2.51415	0.163005780346821	-0.246732	0.380787037037037	-2.76478	0.053177691309987	-2.51805	0.17258883248731	292.227	556.484	59.5301
sp|P51437|CAMP_MOUSE	Camp	sp|P51437|CAMP_MOUSE	sp|P51437|CAMP_MOUSE	Cathelicidin antimicrobial peptide OS=Mus musculus OX=10090 GN=Camp PE=1 SV=2	1	4	41.3	19.453	172	0	133.26	1//0	1//0	1//0	110400000	6	15			-1	18399000	5285900	11565000	1548300	144210000	61820000	37982000				8.33473e+07	5.05678e+07	4.5482e+06	-1.22203	0.18639798488665	-1.92478	0.0827389443651926	-0.702758	0.424277456647399	-0.720918	0.292824074074074	-4.19577	0.0194552529182879	-3.47485	0.0873096446700508	176.038	185.537	13.3002
sp|P51660|DHB4_MOUSE	Hsd17b4	sp|P51660|DHB4_MOUSE	sp|P51660|DHB4_MOUSE	Peroxisomal multifunctional enzyme type 2 OS=Mus musculus OX=10090 GN=Hsd17b4 PE=1 SV=3	1	7	12.9	79.481	735	0	49.438	1//0	1//0	0//0	33971000	34	10			-1	999150	275020	724120		47106000	28168000			SPL_M	SPL_6027	2.02709e+07	1.60996e+07		-0.741854	0.27455919395466					-0.332389	0.363425925925926					9.15909	11.6171	0
sp|P51807|DYLT1_MOUSE	Dynlt1	sp|P51807|DYLT1_MOUSE	sp|P51807|DYLT1_MOUSE	Dynein light chain Tctex-type 1 OS=Mus musculus OX=10090 GN=Dynlt1 PE=1 SV=1	1	5	79.6	12.483	113	0	224.41	1//0	1//0	0//0	210990000	6	21			-1	35164000	401570	34763000		14265000	262950000			SPL_M	SPL_6027	6.33187e+06	1.41863e+08		4.20424	0.931989924433249					4.48573	0.957175925925926					13.3736	557.703	0
sp|P51863|VA0D1_MOUSE	Atp6v0d1	sp|P51863|VA0D1_MOUSE	sp|P51863|VA0D1_MOUSE	V-type proton ATPase subunit d 1 OS=Mus musculus OX=10090 GN=Atp6v0d1 PE=1 SV=2	1	3	9.7	40.301	351	0	22.575	0//0	1//0	0//0	54811000	16	7			-1	3425700		3425700			71781000		SPL_6027		SPL_6027		4.25995e+07														0	54.9586	0
sp|P51881|ADT2_MOUSE	Slc25a5	sp|P51881|ADT2_MOUSE;sp|Q3V132|ADT4_MOUSE	sp|P51881|ADT2_MOUSE	ADP/ATP translocase 2 OS=Mus musculus OX=10090 GN=Slc25a5 PE=1 SV=3	2	31	85.9	32.931	298	0	323.31	1//0	1//0	1//0	5006800000	20	153			-1;-1	250340000	8204900	166560000	75581000	1005200000	3851700000	1492600000				2.56188e+08	1.05161e+09	5.21505e+08	1.93801	0.768261964735516	0.570345	0.644793152639087	-1.36767	0.305202312138728	2.03733	0.767361111111111	1.02548	0.702983138780804	-1.01185	0.404060913705584	273.251	2672.13	649.256
sp|P52293|IMA1_MOUSE	Kpna2	sp|P52293|IMA1_MOUSE	sp|P52293|IMA1_MOUSE	Importin subunit alpha-1 OS=Mus musculus OX=10090 GN=Kpna2 PE=1 SV=2	1	2	6.2	57.927	529	0	19.774	0//0	1//0	0//0	8708200	22	5			-1	395830		395830			10206000		SPL_6027		SPL_6027		6.7682e+06														0	6.35031	0
sp|P52332|JAK1_MOUSE	Jak1	sp|P52332|JAK1_MOUSE	sp|P52332|JAK1_MOUSE	Tyrosine-protein kinase JAK1 OS=Mus musculus OX=10090 GN=Jak1 PE=1 SV=1	1	2	2.2	133.37	1153	0.0036496	10.174	0//0	1//0	0//0	68313000	65	3			-1	1051000		1051000			91396000		SPL_6027		SPL_6027		5.30935e+07														0	16.8612	0
sp|P52432|RPAC1_MOUSE	Polr1c	sp|P52432|RPAC1_MOUSE	sp|P52432|RPAC1_MOUSE	DNA-directed RNA polymerases I and III subunit RPAC1 OS=Mus musculus OX=10090 GN=Polr1c PE=1 SV=3	1	2	6.9	39.106	346	0.0021368	11.259	0//0	1//0	1//0	15791000	12	2			-1	1315900		822140	493790		5723300	11282000	SPL_6027	SPL_21358			7.66767e+06	2.9011e+06					0.979104	0.809248554913295					-1.40219	0.328934010152284	0	13.1896	4.24176
sp|P52479|UBP10_MOUSE	Usp10	sp|P52479|UBP10_MOUSE;sp|P52479-2|UBP10_MOUSE	sp|P52479|UBP10_MOUSE;sp|P52479-2|UBP10_MOUSE	Ubiquitin carboxyl-terminal hydrolase 10 OS=Mus musculus OX=10090 GN=Usp10 PE=1 SV=3;Isoform 2 of Ubiquitin carboxyl-terminal hydrolase 10 OS=Mus musculus OX=10090 GN=Usp10	2	5	9.7	87.021	792	0	32.299	1//0	0//0	0//0	28693000	34	11			-1;-1	843930	843930			132340000			SPL_M	SPL_M		6.21074e+07															28.1057	0	0
sp|P52480|KPYM_MOUSE	Pkm	sp|P52480|KPYM_MOUSE;sp|P52480-2|KPYM_MOUSE;sp|P53657|KPYR_MOUSE	sp|P52480|KPYM_MOUSE;sp|P52480-2|KPYM_MOUSE	Pyruvate kinase PKM OS=Mus musculus OX=10090 GN=Pkm PE=1 SV=4;Isoform M1 of Pyruvate kinase PKM OS=Mus musculus OX=10090 GN=Pkm	3	17	47.5	57.844	531	0	323.31	1//0	1//0	1//0	882220000	30	42			-1;-1;-1	29407000	732100	283410	28392000	42467000	18586000	778140000				5.39139e+07	6.60817e+06	2.66187e+08	-1.19213	0.191435768261965	4.19562	0.98716119828816	5.38774	1	-3.02833	0.0509259259259259	2.30371	0.896238651102464	5.33205	0.998984771573604	24.3814	4.54675	243.893
sp|P52503|NDUS6_MOUSE	Ndufs6	sp|P52503|NDUS6_MOUSE	sp|P52503|NDUS6_MOUSE	NADH dehydrogenase [ubiquinone] iron-sulfur protein 6, mitochondrial OS=Mus musculus OX=10090 GN=Ndufs6 PE=1 SV=2	1	6	59.5	13.02	116	0	122.06	1//0	1//0	1//0	1038800000	7	44			-1	148400000	15472000	80483000	52442000	441650000	637230000	465810000				2.26999e+08	3.86581e+08	1.79725e+08	0.528911	0.551637279596977	0.0768381	0.457917261055635	-0.452073	0.485549132947977	0.768088	0.552083333333333	-0.336889	0.346303501945525	-1.10498	0.382741116751269	515.269	1291.19	450.488
sp|P52623|UCK1_MOUSE	Uck1	sp|P52623|UCK1_MOUSE	sp|P52623|UCK1_MOUSE	Uridine-cytidine kinase 1 OS=Mus musculus OX=10090 GN=Uck1 PE=1 SV=2	1	5	21.3	31.068	277	0	37.881	0//0	1//0	0//0	42099000	12	4			-1	3508300		3508300			54256000		SPL_6027		SPL_6027		2.73463e+07														0	56.2837	0
sp|P52825|CPT2_MOUSE	Cpt2	sp|P52825|CPT2_MOUSE	sp|P52825|CPT2_MOUSE	Carnitine O-palmitoyltransferase 2, mitochondrial OS=Mus musculus OX=10090 GN=Cpt2 PE=1 SV=2	1	5	10	73.98	658	0	31.237	0//0	1//0	0//0	25922000	33	4			-1	785520		785520			33218000		SPL_6027		SPL_6027		1.968e+07														0	12.6021	0
sp|P53026|RL10A_MOUSE	Rpl10a	sp|P53026|RL10A_MOUSE	sp|P53026|RL10A_MOUSE	60S ribosomal protein L10a OS=Mus musculus OX=10090 GN=Rpl10a PE=1 SV=3	1	11	47.9	24.916	217	0	170.44	1//0	1//0	1//0	1425500000	11	76			-1	129590000	17547000	75620000	36427000	946420000	907880000	465380000				3.42092e+08	3.25299e+08	1.4152e+08	-0.0599789	0.420654911838791	-1.02407	0.195435092724679	-0.964092	0.375722543352601	-0.0726181	0.412037037037037	-1.27338	0.203631647211414	-1.20076	0.357360406091371	584.374	1213.17	312.915
sp|P53702|CCHL_MOUSE	Hccs	sp|P53702|CCHL_MOUSE	sp|P53702|CCHL_MOUSE	Holocytochrome c-type synthase OS=Mus musculus OX=10090 GN=Hccs PE=1 SV=2	1	4	22.8	30.977	272	0	30.947	0//0	1//0	0//0	20716000	14	6			-1	1479700		1479700			25612000		SPL_6027		SPL_6027		1.46061e+07														0	23.7389	0
sp|P53811|PIPNB_MOUSE	Pitpnb	sp|P53811|PIPNB_MOUSE	sp|P53811|PIPNB_MOUSE	Phosphatidylinositol transfer protein beta isoform OS=Mus musculus OX=10090 GN=Pitpnb PE=1 SV=2	1	2	8.1	31.487	271	0.0031364	10.317	0//0	1//0	0//0	0	19	2			-1	0							SPL_6027		SPL_6027		0														0	0	0
sp|P53986|MOT1_MOUSE	Slc16a1	sp|P53986|MOT1_MOUSE	sp|P53986|MOT1_MOUSE	Monocarboxylate transporter 1 OS=Mus musculus OX=10090 GN=Slc16a1 PE=1 SV=1	1	5	11.4	53.267	493	0	323.31	0//0	1//0	1//0	471220000	13	26			-1	36248000		29551000	6696700		451380000	90100000	SPL_6027	SPL_21358			2.87743e+08	4.26229e+07					-2.32474	0.183815028901734					-2.75508	0.145177664974619	0	474.087	57.526
sp|P53994|RAB2A_MOUSE	Rab2a	sp|P53994|RAB2A_MOUSE;sp|P59279|RAB2B_MOUSE	sp|P53994|RAB2A_MOUSE	Ras-related protein Rab-2A OS=Mus musculus OX=10090 GN=Rab2a PE=1 SV=1	2	11	57.5	23.547	212	0	250.19	0//0	1//0	0//0	313040000	14	19			-1;-1	22360000		22360000			398940000		SPL_6027		SPL_6027		1.76521e+08														0	358.722	0
sp|P53995|APC1_MOUSE	Anapc1	sp|P53995|APC1_MOUSE	sp|P53995|APC1_MOUSE	Anaphase-promoting complex subunit 1 OS=Mus musculus OX=10090 GN=Anapc1 PE=1 SV=2	1	15	12.9	215.99	1944	0	135.2	0//0	1//0	1//0	226770000	86	28			-1	2636900		2114300	522630		233930000	31996000	SPL_6027	SPL_21358			5.00067e+07	2.20057e+07					-2.87011	0.135260115606936					-1.18424	0.361421319796954	0	33.9198	4.4895
sp|P53996-2|CNBP_MOUSE	Cnbp	sp|P53996-2|CNBP_MOUSE;sp|P53996-3|CNBP_MOUSE;sp|P53996|CNBP_MOUSE	sp|P53996-2|CNBP_MOUSE;sp|P53996-3|CNBP_MOUSE;sp|P53996|CNBP_MOUSE	Isoform 2 of Cellular nucleic acid-binding protein OS=Mus musculus OX=10090 GN=Cnbp;Isoform 3 of Cellular nucleic acid-binding protein OS=Mus musculus OX=10090 GN=Cnbp;Cellular nucleic acid-binding protein OS=Mus musculus OX=10090 GN=Cnbp PE=1 SV=2	3	6	45.3	18.742	170	0	152.88	1//0	1//0	1//0	260750000	12	41			-1;-1;-1	21730000	6356800	2007600	13365000	268660000	53132000	202680000				1.45922e+08	1.87239e+07	7.85217e+07	-2.33813	0.0705289672544081	-0.406578	0.316690442225392	1.93155	0.938728323699422	-2.96224	0.056712962962963	-0.894034	0.247730220492866	2.06821	0.905583756345178	211.703	32.208	114.808
sp|P54116|STOM_MOUSE	Stom	sp|P54116|STOM_MOUSE	sp|P54116|STOM_MOUSE	Stomatin OS=Mus musculus OX=10090 GN=Stom PE=1 SV=3	1	13	56	31.375	284	0	222.46	0//0	1//0	0//0	635760000	15	32			-1	42384000		42384000			813980000		SPL_6027		SPL_6027		3.37454e+08														0	679.967	0
sp|P54775|PRS6B_MOUSE	Psmc4	sp|P54775|PRS6B_MOUSE	sp|P54775|PRS6B_MOUSE	26S proteasome regulatory subunit 6B OS=Mus musculus OX=10090 GN=Psmc4 PE=1 SV=2	1	24	75.6	47.408	418	0	323.31	1//0	1//0	1//0	1027300000	21	105			-1	48919000	1065900	27485000	20368000	183450000	591870000	447410000				4.16105e+07	1.28218e+08	1.05342e+08	1.68989	0.739294710327456	1.28621	0.833095577746077	-0.403683	0.495953757225434	1.62357	0.709490740740741	1.34006	0.770428015564202	-0.283511	0.560406091370558	35.498	440.942	174.965
sp|P54818|GALC_MOUSE	Galc	sp|P54818|GALC_MOUSE	sp|P54818|GALC_MOUSE	Galactocerebrosidase OS=Mus musculus OX=10090 GN=Galc PE=1 SV=2	1	7	18.7	77.256	684	0	55.163	1//0	1//0	0//0	69267000	25	12			-1	2770700	358550	2412100		30062000	80562000			SPL_M	SPL_6027	2.35565e+07	3.38766e+07		1.42216	0.701511335012594					0.524165	0.5					11.9409	38.6974	0
sp|P54822|PUR8_MOUSE	Adsl	sp|P54822|PUR8_MOUSE	sp|P54822|PUR8_MOUSE	Adenylosuccinate lyase OS=Mus musculus OX=10090 GN=Adsl PE=1 SV=2	1	8	30	54.866	484	0	93.959	1//0	1//0	1//0	226250000	23	19			-1	9837000	142840	588680	9105500		39244000	156120000				8.63351e+06	1.05231e+07	7.56884e+07					1.99211	0.947976878612717	0.285547	0.471064814814815	3.13205	0.958495460440986	2.84651	0.949238578680203	4.75705	9.4442	78.2181
sp|P55096|ABCD3_MOUSE	Abcd3	sp|P55096|ABCD3_MOUSE	sp|P55096|ABCD3_MOUSE	ATP-binding cassette sub-family D member 3 OS=Mus musculus OX=10090 GN=Abcd3 PE=1 SV=2	1	2	4.2	75.474	659	0.0011669	14.54	0//0	1//0	0//0	18519000	35	4			-1	529100		529100			23325000		SPL_6027		SPL_6027		1.43929e+07														0	8.48836	0
sp|P55258|RAB8A_MOUSE	Rab8a	sp|P55258|RAB8A_MOUSE	sp|P55258|RAB8A_MOUSE	Ras-related protein Rab-8A OS=Mus musculus OX=10090 GN=Rab8a PE=1 SV=2	1	3	21.7	23.668	207	0	111.99	1//0	1//0	1//0	187010000	13	20			-1	14385000	815510	11322000	2247700	58965000	135120000	42459000				2.78606e+07	1.14396e+08	1.43059e+07	1.19631	0.675062972292191	-0.473788	0.302425106990014	-1.6701	0.261271676300578	2.03774	0.768518518518518	-0.961618	0.239948119325551	-2.99936	0.116751269035533	27.1592	181.639	19.3082
sp|P56135|ATPK_MOUSE	Atp5mf	sp|P56135|ATPK_MOUSE	sp|P56135|ATPK_MOUSE	ATP synthase subunit f, mitochondrial OS=Mus musculus OX=10090 GN=Atp5mf PE=1 SV=3	1	4	33	10.344	88	0	40.09	1//0	1//0	1//0	512570000	4	28			-1	128140000	5551500	102450000	20140000	142790000	482280000	89677000				5.83576e+07	3.02495e+08	3.94409e+07	1.75598	0.748110831234257	-0.671085	0.25962910128388	-2.42706	0.171098265895954	2.37392	0.818287037037037	-0.565226	0.303501945525292	-2.93915	0.128934010152284	184.884	1643.61	173.007
sp|P56382|ATP5E_MOUSE	Atp5f1e	sp|P56382|ATP5E_MOUSE	sp|P56382|ATP5E_MOUSE	ATP synthase subunit epsilon, mitochondrial OS=Mus musculus OX=10090 GN=Atp5f1e PE=1 SV=2	1	3	44.2	5.8378	52	0	20.137	1//0	1//0	1//0	520110000	3	20			-1	173370000	15574000	105310000	52491000	182420000	388030000	196580000				1.22787e+08	2.45536e+08	7.70986e+07	1.0889	0.661209068010076	0.107853	0.465049928673324	-0.981052	0.372254335260116	0.99978	0.600694444444444	-0.67138	0.284046692607004	-1.67116	0.282233502538071	518.666	1689.49	450.909
sp|P56391|CX6B1_MOUSE	Cox6b1	sp|P56391|CX6B1_MOUSE	sp|P56391|CX6B1_MOUSE	Cytochrome c oxidase subunit 6B1 OS=Mus musculus OX=10090 GN=Cox6b1 PE=1 SV=2	1	12	84.9	10.071	86	0	238.43	1//0	1//0	1//0	2394400000	6	86			-1	399060000	39279000	331360000	28426000	1035700000	2490800000	262230000				4.48838e+08	1.05956e+09	7.19256e+07	1.266	0.685138539042821	-1.9817	0.0770328102710414	-3.2477	0.115606936416185	1.2392	0.634259259259259	-2.64162	0.0609597924773022	-3.88082	0.0598984771573604	1308.12	5316.01	244.185
sp|P56394|COX17_MOUSE	Cox17	sp|P56394|COX17_MOUSE	sp|P56394|COX17_MOUSE	Cytochrome c oxidase copper chaperone OS=Mus musculus OX=10090 GN=Cox17 PE=1 SV=2	1	3	42.9	6.784	63	0	35.711	1//0	0//0	0//0	36476000	4	5			-1	9119100	9119100			168670000			SPL_M	SPL_M		9.58592e+07															303.697	0	0
sp|P56395|CYB5_MOUSE	Cyb5a	sp|P56395|CYB5_MOUSE	sp|P56395|CYB5_MOUSE	Cytochrome b5 OS=Mus musculus OX=10090 GN=Cyb5a PE=1 SV=2	1	8	82.8	15.241	134	0	194.56	1//0	1//0	0//0	1123500000	6	40			-1	187260000	7672600	179590000		262620000	1345800000			SPL_M	SPL_6027	1.20981e+08	5.04396e+08		2.35742	0.82367758186398					2.05977	0.770833333333333					255.523	2881.17	0
sp|P56399|UBP5_MOUSE	Usp5	sp|P56399|UBP5_MOUSE	sp|P56399|UBP5_MOUSE	Ubiquitin carboxyl-terminal hydrolase 5 OS=Mus musculus OX=10090 GN=Usp5 PE=1 SV=1	1	6	8.4	95.832	858	0	90.096	1//0	1//0	1//0	96687000	38	26			-1	2544400	108640	1469700	966100	24909000	64242000	28470000				1.0849e+07	3.45188e+07	1.79738e+07	1.36685	0.692695214105793	0.192775	0.500713266761769	-1.17407	0.342196531791908	1.66983	0.716435185185185	0.728342	0.639429312581064	-0.941484	0.420304568527919	3.61808	23.5784	8.299
sp|P56400|GP1BB_MOUSE	Gp1bb	sp|P56400|GP1BB_MOUSE	sp|P56400|GP1BB_MOUSE	Platelet glycoprotein Ib beta chain OS=Mus musculus OX=10090 GN=Gp1bb PE=1 SV=1	1	4	32.5	21.763	206	0	24.853	0//0	1//0	0//0	81486000	5	10			-1	16297000		16297000			95321000		SPL_6027		SPL_6027		5.73064e+07														0	261.453	0
sp|P56480|ATPB_MOUSE	Atp5f1b	sp|P56480|ATPB_MOUSE	sp|P56480|ATPB_MOUSE	ATP synthase subunit beta, mitochondrial OS=Mus musculus OX=10090 GN=Atp5f1b PE=1 SV=2	1	46	85.1	56.3	529	0	323.31	1//0	1//0	1//0	35929000000	29	564			-1	1238900000	83286000	827270000	328390000	12885000000	27625000000	9734200000				2.42246e+09	6.0372e+09	1.83915e+09	1.10028	0.662468513853904	-0.404558	0.319543509272468	-1.50484	0.283236994219653	1.31741	0.648148148148148	-0.397431	0.33852140077821	-1.71484	0.276142131979695	2773.7	13271.9	2820.94
sp|P56528|CD38_MOUSE	Cd38	sp|P56528|CD38_MOUSE	sp|P56528|CD38_MOUSE	ADP-ribosyl cyclase/cyclic ADP-ribose hydrolase 1 OS=Mus musculus OX=10090 GN=Cd38 PE=1 SV=2	1	3	13.8	34.407	304	0	157.26	0//0	1//0	0//0	103550000	16	12			-1	6471800		6471800			130650000		SPL_6027		SPL_6027		8.048e+07														0	103.827	0
sp|P57080|UBP25_MOUSE	Usp25	sp|P57080|UBP25_MOUSE	sp|P57080|UBP25_MOUSE	Ubiquitin carboxyl-terminal hydrolase 25 OS=Mus musculus OX=10090 GN=Usp25 PE=1 SV=2	1	5	6.3	121.42	1055	0	33.958	0//0	1//0	0//0	32754000	59	5			-1	555160		555160			43243000		SPL_6027		SPL_6027		2.09484e+07														0	8.90644	0
sp|P57746|VATD_MOUSE	Atp6v1d	sp|P57746|VATD_MOUSE	sp|P57746|VATD_MOUSE	V-type proton ATPase subunit D OS=Mus musculus OX=10090 GN=Atp6v1d PE=1 SV=1	1	2	10.5	28.369	247	0.001113	12.832	0//0	1//0	1//0	35398000	13	4			-1	2722900		969640	1753300		7251900	28780000	SPL_6027	SPL_21358			9.79703e+06	1.11593e+07					1.98864	0.946820809248555					0.187824	0.66497461928934	0	15.556	15.0612
sp|P57776|EF1D_MOUSE	Eef1d	sp|P57776|EF1D_MOUSE;sp|P57776-3|EF1D_MOUSE	sp|P57776|EF1D_MOUSE;sp|P57776-3|EF1D_MOUSE	Elongation factor 1-delta OS=Mus musculus OX=10090 GN=Eef1d PE=1 SV=3;Isoform 3 of Elongation factor 1-delta OS=Mus musculus OX=10090 GN=Eef1d	2	12	53.4	31.293	281	0	213.02	1//0	1//0	1//0	949420000	17	60			-1;-1	55848000	5991100	10140000	39717000	399830000	246350000	614860000				1.88432e+08	7.60048e+07	2.64101e+08	-0.698677	0.28463476070529	0.620871	0.667617689015692	1.31955	0.863583815028902	-1.30988	0.209490740740741	0.487043	0.584954604409857	1.79693	0.882233502538071	199.524	162.676	341.177
sp|P57780|ACTN4_MOUSE	Actn4	sp|P57780|ACTN4_MOUSE;sp|Q9JI91|ACTN2_MOUSE;sp|O88990|ACTN3_MOUSE	sp|P57780|ACTN4_MOUSE	Alpha-actinin-4 OS=Mus musculus OX=10090 GN=Actn4 PE=1 SV=1	3	6	24.7	104.98	912	0	39.707	1//0	1//0	1//0	70967000	55	12			-1;-1;-1	1290300	30351	445100	814870	14701000	36391000	23342000				4.38687e+06	1.51478e+07	2.19428e+07	1.30767	0.688916876574307	0.667014	0.679029957203994	-0.640654	0.436994219653179	1.78785	0.732638888888889	2.32249	0.900129701686122	0.534637	0.721827411167513	1.01079	7.14075	6.9999
sp|P57784|RU2A_MOUSE	Snrpa1	sp|P57784|RU2A_MOUSE	sp|P57784|RU2A_MOUSE	U2 small nuclear ribonucleoprotein A OS=Mus musculus OX=10090 GN=Snrpa1 PE=1 SV=2	1	3	18.8	28.357	255	0.00061767	17.881	0//0	1//0	1//0	21515000	10	4			-1	2151500		547900	1603600		6705500		SPL_6027	SPL_21358			4.25835e+06	7.85115e+06											0.882611	0.785786802030457	0	8.78997	13.7753
sp|P58021|TM9S2_MOUSE	Tm9sf2	sp|P58021|TM9S2_MOUSE	sp|P58021|TM9S2_MOUSE	Transmembrane 9 superfamily member 2 OS=Mus musculus OX=10090 GN=Tm9sf2 PE=1 SV=1	1	10	17.5	75.329	662	0	118.08	0//0	1//0	0//0	340800000	17	28			-1	20047000		20047000			437220000		SPL_6027		SPL_6027		1.74682e+08														0	321.614	0
sp|P58252|EF2_MOUSE	Eef2	sp|P58252|EF2_MOUSE	sp|P58252|EF2_MOUSE	Elongation factor 2 OS=Mus musculus OX=10090 GN=Eef2 PE=1 SV=2	1	23	35.8	95.313	858	0	213	1//0	1//0	1//0	620650000	45	67			-1	13792000	808710	3762800	9220700	186420000	156590000	395960000				4.73137e+07	4.60952e+07	1.16627e+08	-0.251565	0.386649874055416	1.0868	0.801711840228245	1.33836	0.864739884393064	-0.0376413	0.417824074074074	1.30157	0.763942931258106	1.33921	0.842639593908629	26.9328	60.3667	79.2077
sp|P58281|OPA1_MOUSE	Opa1	sp|P58281|OPA1_MOUSE;sp|P58281-2|OPA1_MOUSE	sp|P58281|OPA1_MOUSE;sp|P58281-2|OPA1_MOUSE	Dynamin-like 120 kDa protein, mitochondrial OS=Mus musculus OX=10090 GN=Opa1 PE=1 SV=1;Isoform 2 of Dynamin-like 120 kDa protein, mitochondrial OS=Mus musculus OX=10090 GN=Opa1	2	2	3.4	111.34	960	0.0021142	10.821	1//0	0//0	1//0	4753400	55	3			-1;-1	86425	86425			21329000			SPL_M		SPL_21358	1.24917e+07		0													2.87824	0	0
sp|P58404-2|STRN4_MOUSE	Strn4	sp|P58404-2|STRN4_MOUSE;sp|P58404|STRN4_MOUSE	sp|P58404-2|STRN4_MOUSE;sp|P58404|STRN4_MOUSE	Isoform 2 of Striatin-4 OS=Mus musculus OX=10090 GN=Strn4;Striatin-4 OS=Mus musculus OX=10090 GN=Strn4 PE=1 SV=2	2	4	10.5	80.974	753	0	24.427	0//0	1//0	0//0	23380000	22	4			-1;-1	1062700		1062700			29959000		SPL_6027		SPL_6027		1.44628e+07														0	17.0489	0
sp|P58468|F207A_MOUSE	Fam207a	sp|P58468|F207A_MOUSE	sp|P58468|F207A_MOUSE	Protein FAM207A OS=Mus musculus OX=10090 GN=Fam207a PE=1 SV=1	1	4	25.1	24.814	219	0	26.867	0//0	0//0	1//0	217950000	10	10			-1	21795000			21795000			184930000		SPL_21358	SPL_21358			1.05025e+08													0	0	187.224
sp|P58871|TB182_MOUSE	Tnks1bp1	sp|P58871|TB182_MOUSE	sp|P58871|TB182_MOUSE	182 kDa tankyrase-1-binding protein OS=Mus musculus OX=10090 GN=Tnks1bp1 PE=1 SV=2	1	3	2.6	181.82	1720	0	23.081	1//0	1//0	1//0	87525000	82	12			-1	1067400	236870	109940	720570	76748000	22320000	51557000				5.10447e+07	7.00673e+06	2.89283e+07	-1.78179	0.115869017632242	-0.573961	0.276747503566334	1.20783	0.848554913294798	-2.86495	0.0601851851851852	-0.819279	0.25810635538262	2.04567	0.90253807106599	7.88856	1.76377	6.18985
sp|P59017|B2L13_MOUSE	Bcl2l13	sp|P59017|B2L13_MOUSE	sp|P59017|B2L13_MOUSE	Bcl-2-like protein 13 OS=Mus musculus OX=10090 GN=Bcl2l13 PE=1 SV=2	1	3	17.1	46.719	434	0	32.422	1//0	1//0	0//0	110070000	15	9			-1	7338200	213560	7124600		29645000	124540000			SPL_M	SPL_6027	8.41849e+06	8.30609e+07		2.07075	0.792191435768262					3.30254	0.907407407407407					7.11226	114.3	0
sp|P59235|NUP43_MOUSE	Nup43	sp|P59235|NUP43_MOUSE	sp|P59235|NUP43_MOUSE	Nucleoporin Nup43 OS=Mus musculus OX=10090 GN=Nup43 PE=1 SV=2	1	7	27.4	41.989	380	0	97.142	0//0	1//0	0//0	97713000	12	12			-1	8142700		8142700			124830000		SPL_6027		SPL_6027		6.39187e+07														0	130.633	0
sp|P59764-2|DOCK4_MOUSE	Dock4	sp|P59764-2|DOCK4_MOUSE;sp|P59764|DOCK4_MOUSE;sp|Q8CIQ7|DOCK3_MOUSE	sp|P59764-2|DOCK4_MOUSE;sp|P59764|DOCK4_MOUSE	Isoform 2 of Dedicator of cytokinesis protein 4 OS=Mus musculus OX=10090 GN=Dock4;Dedicator of cytokinesis protein 4 OS=Mus musculus OX=10090 GN=Dock4 PE=1 SV=1	3	5	3.2	222.19	1936	0	40.428	0//0	1//0	1//0	25135000	99	10			-1;-1;-1	253890		208600	45293		27975000	4909300	SPL_6027	SPL_21358			1.40725e+07	2.19535e+06					-2.51055	0.164161849710983					-2.68036	0.158375634517766	0	3.34657	0.389076
sp|P59999|ARPC4_MOUSE	Arpc4	sp|P59999|ARPC4_MOUSE	sp|P59999|ARPC4_MOUSE	Actin-related protein 2/3 complex subunit 4 OS=Mus musculus OX=10090 GN=Arpc4 PE=1 SV=3	1	11	73.2	19.667	168	0	189.4	1//0	1//0	1//0	1314400000	10	56			-1	131440000	19992000	41835000	69614000	923390000	463100000	677980000				4.42574e+08	2.24469e+08	3.08055e+08	-0.995616	0.222921914357683	-0.445697	0.308131241084165	0.549919	0.71907514450867	-0.979401	0.252314814814815	-0.52273	0.312581063553826	0.456671	0.70761421319797	665.801	671.16	597.999
sp|P60122|RUVB1_MOUSE	Ruvbl1	sp|P60122|RUVB1_MOUSE	sp|P60122|RUVB1_MOUSE	RuvB-like 1 OS=Mus musculus OX=10090 GN=Ruvbl1 PE=1 SV=1	1	21	62.1	50.213	456	0	323.31	1//0	1//0	1//0	2045400000	20	156			-1	102270000	20257000	44629000	37382000	1600300000	974480000	1108100000				3.8018e+08	2.00407e+08	1.75441e+08	-0.715638	0.282115869017632	-0.530254	0.285306704707561	0.185384	0.630057803468208	-0.923748	0.262731481481481	-1.1157	0.219195849546044	-0.191952	0.580710659898477	674.626	715.984	321.119
sp|P60229|EIF3E_MOUSE	Eif3e	sp|P60229|EIF3E_MOUSE	sp|P60229|EIF3E_MOUSE	Eukaryotic translation initiation factor 3 subunit E OS=Mus musculus OX=10090 GN=Eif3e PE=1 SV=1	1	6	14.6	52.22	445	0	49.046	1//0	1//0	1//0	73959000	28	12			-1	2641400	93884	1397900	1149600		52947000					6.90818e+06	2.90399e+07	1.57598e+07							2.07166	0.771990740740741	1.18987	0.738002594033722	-0.88179	0.429441624365482	3.12665	22.4265	9.8753
sp|P60335|PCBP1_MOUSE	Pcbp1	sp|P60335|PCBP1_MOUSE	sp|P60335|PCBP1_MOUSE	Poly(rC)-binding protein 1 OS=Mus musculus OX=10090 GN=Pcbp1 PE=1 SV=1	1	15	77.8	37.497	356	0	315.16	1//0	1//0	1//0	1468500000	17	96			-1	86383000	12204000	24723000	49456000	943960000	529420000	759330000				3.71918e+08	1.6311e+08	2.71238e+08	-0.834313	0.253148614609572	-0.313999	0.335235378031384	0.520314	0.710982658959538	-1.18914	0.224537037037037	-0.455422	0.328145265888457	0.733719	0.760406091370558	406.434	396.632	424.837
sp|P60605|UB2G2_MOUSE	Ube2g2	sp|P60605|UB2G2_MOUSE	sp|P60605|UB2G2_MOUSE	Ubiquitin-conjugating enzyme E2 G2 OS=Mus musculus OX=10090 GN=Ube2g2 PE=1 SV=1	1	4	43.6	18.566	165	0	40.363	1//0	1//0	0//0	107950000	5	14			-1	21589000	5149200	16440000		113150000	105050000			SPL_M	SPL_6027	6.76599e+07	5.3914e+07		-0.10716	0.414357682619647					-0.327642	0.364583333333333					171.486	263.747	0
sp|P60710|ACTB_MOUSE	Actb	sp|P60710|ACTB_MOUSE	sp|P60710|ACTB_MOUSE	Actin, cytoplasmic 1 OS=Mus musculus OX=10090 GN=Actb PE=1 SV=1	1	56	99.2	41.736	375	0	323.31	1//0	1//0	1//0	93702000000	20	720			-1	4685100000	672720000	3186000000	826390000	48353000000	92835000000	18201000000				2.12063e+10	1.79458e+10	3.43821e+09	0.941063	0.63727959697733	-1.40959	0.131241084165478	-2.35065	0.18150289017341	-0.240852	0.383101851851852	-2.62476	0.0635538261997406	-2.38391	0.189847715736041	22403.8	51113.1	7098.86
sp|P60766|CDC42_MOUSE	Cdc42	sp|P60766|CDC42_MOUSE;sp|P60766-1|CDC42_MOUSE;sp|Q9ER71-2|RHOJ_MOUSE;sp|Q8R527|RHOQ_MOUSE;sp|Q9ER71|RHOJ_MOUSE	sp|P60766|CDC42_MOUSE;sp|P60766-1|CDC42_MOUSE	Cell division control protein 42 homolog OS=Mus musculus OX=10090 GN=Cdc42 PE=1 SV=2;Isoform 1 of Cell division control protein 42 homolog OS=Mus musculus OX=10090 GN=Cdc42	5	9	58.6	21.258	191	0	323.31	1//0	1//0	1//0	1931600000	9	88			-1;-1;-1;-1;-1	214620000	13580000	100230000	100820000	573550000	833220000	1081100000				2.85918e+08	4.84951e+08	3.77921e+08	0.538778	0.555415617128463	0.914509	0.764621968616263	0.375731	0.671676300578035	0.762237	0.550925925925926	0.402484	0.557717250324254	-0.359753	0.550253807106599	452.259	1607.99	866.065
sp|P60843|IF4A1_MOUSE	Eif4a1	sp|P60843|IF4A1_MOUSE;sp|P10630|IF4A2_MOUSE;sp|P10630-2|IF4A2_MOUSE;sp|Q91VC3|IF4A3_MOUSE	sp|P60843|IF4A1_MOUSE;sp|P10630|IF4A2_MOUSE;sp|P10630-2|IF4A2_MOUSE	Eukaryotic initiation factor 4A-I OS=Mus musculus OX=10090 GN=Eif4a1 PE=1 SV=1;Eukaryotic initiation factor 4A-II OS=Mus musculus OX=10090 GN=Eif4a2 PE=1 SV=2;Isoform 2 of Eukaryotic initiation factor 4A-II OS=Mus musculus OX=10090 GN=Eif4a2	4	12	37.2	46.153	406	0	284.93	1//0	1//0	1//0	1006800000	22	70			-1;-1;-1;-1	45763000	3330200	14394000	28038000	399550000	329220000	539200000				1.3682e+08	1.24036e+08	1.94028e+08	-0.279324	0.377833753148615	0.432444	0.59771754636234	0.711769	0.75606936416185	-0.141523	0.40162037037037	0.50399	0.591439688715953	0.645513	0.747208121827411	110.907	230.923	240.852
sp|P60867|RS20_MOUSE	Rps20	sp|P60867|RS20_MOUSE	sp|P60867|RS20_MOUSE	40S ribosomal protein S20 OS=Mus musculus OX=10090 GN=Rps20 PE=1 SV=1	1	8	63.9	13.373	119	0	142.25	1//0	1//0	1//0	2923100000	5	103			-1	584610000	114810000	180520000	289280000	2677200000	1096400000	1293000000				1.21666e+09	5.4032e+08	5.49913e+08	-1.28795	0.171284634760705	-1.05	0.189728958630528	0.237948	0.645086705202312	-1.17103	0.225694444444444	-1.14565	0.215304798962387	0.0253892	0.629441624365482	3823.56	2896.09	2484.97
sp|P60898|RPB9_MOUSE	Polr2i	sp|P60898|RPB9_MOUSE	sp|P60898|RPB9_MOUSE	DNA-directed RNA polymerase II subunit RPB9 OS=Mus musculus OX=10090 GN=Polr2i PE=1 SV=1	1	2	28.8	14.523	125	0.0011422	13.704	0//0	1//0	0//0	17849000	8	3			-1	2231200		2231200			21000000		SPL_6027		SPL_6027		1.38728e+07														0	35.7952	0
sp|P61021|RAB5B_MOUSE	Rab5b	sp|P61021|RAB5B_MOUSE	sp|P61021|RAB5B_MOUSE	Ras-related protein Rab-5B OS=Mus musculus OX=10090 GN=Rab5b PE=1 SV=1	1	3	23.3	23.707	215	0	31.749	0//0	1//0	0//0	56095000	11	6			-1	5099600		5099600			72947000		SPL_6027		SPL_6027		4.35981e+07														0	81.813	0
sp|P61022|CHP1_MOUSE	Chp1	sp|P61022|CHP1_MOUSE	sp|P61022|CHP1_MOUSE	Calcineurin B homologous protein 1 OS=Mus musculus OX=10090 GN=Chp1 PE=1 SV=2	1	10	58.5	22.432	195	0	292.44	0//0	1//0	1//0	179560000	10	21			-1	17956000		15676000	2279700		203310000		SPL_6027	SPL_21358			7.65575e+07	1.11612e+07											-2.77806	0.142131979695431	0	251.49	19.5831
sp|P61027|RAB10_MOUSE	Rab10	sp|P61027|RAB10_MOUSE;sp|Q9DD03|RAB13_MOUSE	sp|P61027|RAB10_MOUSE	Ras-related protein Rab-10 OS=Mus musculus OX=10090 GN=Rab10 PE=1 SV=1	2	5	24.5	22.541	200	0	202.57	1//0	1//0	0//0	272490000	13	17			-1;-1	20961000	406000	20555000		52684000	322960000			SPL_M	SPL_6027	1.38704e+07	1.84622e+08		2.61592	0.843828715365239					3.73449	0.922453703703704					13.5212	329.764	0
sp|P61028|RAB8B_MOUSE	Rab8b	sp|P61028|RAB8B_MOUSE;sp|Q8K386|RAB15_MOUSE	sp|P61028|RAB8B_MOUSE	Ras-related protein Rab-8B OS=Mus musculus OX=10090 GN=Rab8b PE=1 SV=1	2	3	24.6	23.603	207	0	73.489	1//0	1//0	1//0	235710000	12	14			-1;-1	19642000		8496700	11146000		94149000	151110000				0	7.92451e+07	6.54824e+07					0.682581	0.749132947976879					-0.275215	0.563451776649746	0	136.313	95.7464
sp|P61161|ARP2_MOUSE	Actr2	sp|P61161|ARP2_MOUSE	sp|P61161|ARP2_MOUSE	Actin-related protein 2 OS=Mus musculus OX=10090 GN=Actr2 PE=1 SV=1	1	20	57.6	44.76	394	0	323.31	1//0	1//0	1//0	4962200000	13	188			-1	381710000	50997000	103540000	227170000	3048400000	1816400000	2415300000				7.1684e+08	4.37098e+08	6.11906e+08	-0.74697	0.272040302267003	-0.33585	0.33095577746077	0.41112	0.684393063583815	-0.713694	0.295138888888889	-0.22834	0.364461738002594	0.485354	0.711675126903553	1698.37	1661.09	1951.44
sp|P61164|ACTZ_MOUSE	Actr1a	sp|P61164|ACTZ_MOUSE	sp|P61164|ACTZ_MOUSE	Alpha-centractin OS=Mus musculus OX=10090 GN=Actr1a PE=1 SV=1	1	14	57.7	42.613	376	0	192.7	1//0	1//0	1//0	884370000	19	68			-1	46546000	1432600	34885000	10228000	155310000	666520000	314100000				6.43895e+07	2.7069e+08	7.52165e+07	2.1015	0.795969773299748	1.01607	0.788873038516405	-1.08542	0.358381502890173	2.07174	0.773148148148148	0.224222	0.488975356679637	-1.84752	0.251776649746193	47.7104	559.661	87.8606
sp|P61166|TM258_MOUSE	Tmem258	sp|P61166|TM258_MOUSE	sp|P61166|TM258_MOUSE	Transmembrane protein 258 OS=Mus musculus OX=10090 GN=Tmem258 PE=1 SV=1	1	2	57	9.0788	79	0.0011689	14.636	0//0	1//0	0//0	102390000	2	4			-1	51194000		51194000			134550000		SPL_6027		SPL_6027		7.95772e+07														0	821.306	0
sp|P61222|ABCE1_MOUSE	Abce1	sp|P61222|ABCE1_MOUSE	sp|P61222|ABCE1_MOUSE	ATP-binding cassette sub-family E member 1 OS=Mus musculus OX=10090 GN=Abce1 PE=1 SV=1	1	2	8.3	67.314	599	0.0026261	10.47	0//0	1//0	1//0	2930200	29	2			-1	101040		101040			4566500		SPL_6027	SPL_21358			2.27739e+06	0													0	1.62099	0
sp|P61226|RAP2B_MOUSE	Rap2b	sp|P61226|RAP2B_MOUSE;sp|Q80ZJ1-2|RAP2A_MOUSE;sp|Q80ZJ1|RAP2A_MOUSE	sp|P61226|RAP2B_MOUSE	Ras-related protein Rap-2b OS=Mus musculus OX=10090 GN=Rap2b PE=1 SV=1	3	3	34.4	20.504	183	0	26.145	0//0	1//0	0//0	35136000	11	4			-1;-1;-1	3194100		3194100			45341000		SPL_6027		SPL_6027		2.73077e+07														0	51.243	0
sp|P61255|RL26_MOUSE	Rpl26	sp|P61255|RL26_MOUSE	sp|P61255|RL26_MOUSE	60S ribosomal protein L26 OS=Mus musculus OX=10090 GN=Rpl26 PE=1 SV=1	1	13	54.5	17.258	145	0	224.43	1//0	1//0	1//0	2456100000	6	90			-1	409360000	120560000	161070000	127730000	3108400000	1382000000	751620000				1.14559e+09	5.75142e+08	2.96393e+08	-1.16941	0.195214105793451	-2.0481	0.0713266761768902	-0.878682	0.390751445086705	-0.994104	0.248842592592593	-1.95051	0.118028534370947	-0.956404	0.417258883248731	4015.05	2584.05	1097.23
sp|P61290|PSME3_MOUSE	Psme3	sp|P61290|PSME3_MOUSE	sp|P61290|PSME3_MOUSE	Proteasome activator complex subunit 3 OS=Mus musculus OX=10090 GN=Psme3 PE=1 SV=1	1	12	56.7	29.506	254	0	112.18	1//0	1//0	1//0	347930000	13	33			-1	26764000	1108800	4282000	21373000	89608000	58592000	221520000				3.48636e+07	3.60141e+07	9.06413e+07	-0.612924	0.306045340050378	1.30574	0.840228245363766	1.91866	0.935260115606936	0.0468379	0.431712962962963	1.37844	0.776913099870298	1.33161	0.841624365482234	36.9268	68.6962	183.598
sp|P61358|RL27_MOUSE	Rpl27	sp|P61358|RL27_MOUSE	sp|P61358|RL27_MOUSE	60S ribosomal protein L27 OS=Mus musculus OX=10090 GN=Rpl27 PE=1 SV=2	1	11	53.7	15.798	136	0	135.75	1//0	1//0	1//0	3746200000	5	68			-1	749240000	29843000	474480000	244920000	863270000	2457900000	1472200000				3.65521e+08	1.25746e+09	5.13497e+08	1.50954	0.710327455919396	0.77009	0.713266761768902	-0.739453	0.416184971098266	1.78249	0.730324074074074	0.490402	0.586251621271077	-1.29209	0.342131979695431	993.872	7612.09	2103.91
sp|P61514|RL37A_MOUSE	Rpl37a	sp|P61514|RL37A_MOUSE	sp|P61514|RL37A_MOUSE	60S ribosomal protein L37a OS=Mus musculus OX=10090 GN=Rpl37a PE=1 SV=2	1	6	56.5	10.275	92	0	180.19	1//0	1//0	1//0	1651900000	4	55			-1	412970000	94081000	178970000	139920000	1714200000	913480000	509100000				9.28165e+08	5.02352e+08	2.29683e+08	-0.90809	0.238035264483627	-1.75151	0.0955777460770328	-0.843424	0.396531791907514	-0.885683	0.268518518518519	-2.01473	0.105058365758755	-1.12905	0.377664974619289	3133.21	2871.22	1201.94
sp|P61620|S61A1_MOUSE	Sec61a1	sp|P61620|S61A1_MOUSE;sp|Q9JLR1|S61A2_MOUSE	sp|P61620|S61A1_MOUSE	Protein transport protein Sec61 subunit alpha isoform 1 OS=Mus musculus OX=10090 GN=Sec61a1 PE=1 SV=2	2	10	29	52.264	476	0	141.76	0//0	1//0	1//0	378750000	16	29			-1;-1	23672000		21878000	1794300		460670000	20732000	SPL_6027	SPL_21358			1.80357e+08	1.40559e+07					-4.4738	0.0485549132947977					-3.6816	0.0730964467005076	0	350.989	15.4134
sp|P61750|ARF4_MOUSE	Arf4	sp|P61750|ARF4_MOUSE	sp|P61750|ARF4_MOUSE	ADP-ribosylation factor 4 OS=Mus musculus OX=10090 GN=Arf4 PE=1 SV=2	1	3	61.7	20.396	180	0	105.66	0//0	1//0	1//0	126370000	10	7			-1	12637000		6618200	6019300		87884000	46589000	SPL_6027	SPL_21358			5.14375e+07	2.94704e+07					-0.915611	0.386127167630058					-0.803557	0.442639593908629	0	106.176	51.707
sp|P61804|DAD1_MOUSE	Dad1	sp|P61804|DAD1_MOUSE	sp|P61804|DAD1_MOUSE	Dolichyl-diphosphooligosaccharide--protein glycosyltransferase subunit DAD1 OS=Mus musculus OX=10090 GN=Dad1 PE=1 SV=3	1	4	46.9	12.497	113	0	75.326	0//0	1//0	0//0	62726000	5	6			-1	12545000		12545000			89421000		SPL_6027		SPL_6027		4.36587e+07														0	201.26	0
sp|P61965|WDR5_MOUSE	Wdr5	sp|P61965|WDR5_MOUSE	sp|P61965|WDR5_MOUSE	WD repeat-containing protein 5 OS=Mus musculus OX=10090 GN=Wdr5 PE=1 SV=1	1	2	8.4	36.588	334	0.0011855	15.419	1//0	1//0	0//0	75666000	16	7			-1	4729100	478340	4250800		42102000	70979000			SPL_M	SPL_6027	2.01131e+07	5.28604e+07		0.753503	0.603274559193955					1.39405	0.667824074074074					15.9303	68.1957	0
sp|P61979-3|HNRPK_MOUSE	Hnrnpk	sp|P61979-3|HNRPK_MOUSE;sp|P61979|HNRPK_MOUSE;sp|P61979-2|HNRPK_MOUSE	sp|P61979-3|HNRPK_MOUSE;sp|P61979|HNRPK_MOUSE;sp|P61979-2|HNRPK_MOUSE	Isoform 3 of Heterogeneous nuclear ribonucleoprotein K OS=Mus musculus OX=10090 GN=Hnrnpk;Heterogeneous nuclear ribonucleoprotein K OS=Mus musculus OX=10090 GN=Hnrnpk PE=1 SV=1;Isoform 2 of Heterogeneous nuclear ribonucleoprotein K OS=Mus musculus OX=10090	3	12	31.7	48.51	439	0	107.99	1//0	1//0	1//0	349000000	25	38			-1;-1;-1	13960000	828130	3834900	9297100	91003000	101320000	223040000				4.62938e+07	3.85341e+07	6.82192e+07	0.154933	0.473551637279597	1.29332	0.834522111269615	1.13838	0.835838150289017	-0.264683	0.375	0.559358	0.603112840466926	0.824041	0.779695431472081	27.5795	61.5234	79.864
sp|P61982|1433G_MOUSE	Ywhag	sp|P61982|1433G_MOUSE	sp|P61982|1433G_MOUSE	14-3-3 protein gamma OS=Mus musculus OX=10090 GN=Ywhag PE=1 SV=2	1	4	37.2	28.302	247	0	96.585	1//0	1//0	1//0	77067000	16	9			-1	4816700	193320	3487500	1135800	24460000	36885000	38040000				8.12862e+06	4.33692e+07	8.89732e+06	0.59261	0.568010075566751	0.637093	0.670470756062768	0.044483	0.594219653179191	2.41559	0.822916666666667	0.13036	0.461738002594034	-2.28523	0.2	6.4382	55.95	9.75676
sp|P62046|LRCH1_MOUSE	Lrch1	sp|P62046|LRCH1_MOUSE	sp|P62046|LRCH1_MOUSE	Leucine-rich repeat and calponin homology domain-containing protein 1 OS=Mus musculus OX=10090 GN=Lrch1 PE=1 SV=2	1	3	6.6	79.075	709	0	21.37	1//0	1//0	0//0	13211000	35	4			-1	377450	60116	317330			14514000			SPL_M	SPL_6027	5.52941e+06	8.63219e+06								0.6426	0.525462962962963					2.00206	5.09093	0
sp|P62071|RRAS2_MOUSE	Rras2	sp|P62071|RRAS2_MOUSE	sp|P62071|RRAS2_MOUSE	Ras-related protein R-Ras2 OS=Mus musculus OX=10090 GN=Rras2 PE=1 SV=1	1	3	17.2	23.399	204	0	44.603	0//0	1//0	0//0	47297000	15	7			-1	3153100		3153100			61352000		SPL_6027		SPL_6027		3.67599e+07														0	50.5852	0
sp|P62073|TIM10_MOUSE	Timm10	sp|P62073|TIM10_MOUSE	sp|P62073|TIM10_MOUSE	Mitochondrial import inner membrane translocase subunit Tim10 OS=Mus musculus OX=10090 GN=Timm10 PE=1 SV=1	1	9	71.1	10.333	90	0	323.31	0//0	1//0	1//0	2416000000	7	62			-1	345140000		275420000	69720000		2417500000	500050000	SPL_6027	SPL_21358			8.81517e+08	2.38944e+08					-2.27337	0.194219653179191					-1.88332	0.246700507614213	0	4418.57	598.909
sp|P62075|TIM13_MOUSE	Timm13	sp|P62075|TIM13_MOUSE	sp|P62075|TIM13_MOUSE	Mitochondrial import inner membrane translocase subunit Tim13 OS=Mus musculus OX=10090 GN=Timm13 PE=1 SV=1	1	5	61.1	10.458	95	0	70.369	1//0	1//0	1//0	246640000	6	15			-1	41107000	1299100	15813000	23995000	47587000	82766000	148550000				2.04846e+07	6.69268e+07	7.0488e+07	0.798471	0.615869017632242	1.64231	0.890156918687589	0.843838	0.788439306358382	1.70804	0.71875	1.78284	0.837872892347601	0.0747951	0.640609137055838	43.2644	253.688	206.122
sp|P62077|TIM8B_MOUSE	Timm8b	sp|P62077|TIM8B_MOUSE	sp|P62077|TIM8B_MOUSE	Mitochondrial import inner membrane translocase subunit Tim8 B OS=Mus musculus OX=10090 GN=Timm8b PE=1 SV=1	1	4	50.6	9.2864	83	0	31.666	0//0	1//0	1//0	86096000	7	8			-1	12299000		2267400	10032000		21268000	58226000	SPL_6027	SPL_21358			1.23359e+07	3.43817e+07					1.45298	0.886705202312139					1.47878	0.856852791878173	0	36.3759	86.177
sp|P62082|RS7_MOUSE	Rps7	sp|P62082|RS7_MOUSE	sp|P62082|RS7_MOUSE	40S ribosomal protein S7 OS=Mus musculus OX=10090 GN=Rps7 PE=2 SV=1	1	9	60.3	22.127	194	0	321.41	1//0	1//0	1//0	1422600000	11	80			-1	129320000	24262000	26405000	78656000	1120800000	312880000	921530000				3.94817e+08	1.35066e+08	3.71654e+08	-1.84085	0.10831234256927	-0.282426	0.348074179743224	1.55842	0.904046242774566	-1.54753	0.185185185185185	-0.0872232	0.402075226977951	1.4603	0.852791878172589	808.006	423.616	675.671
sp|P62137|PP1A_MOUSE	Ppp1ca	sp|P62137|PP1A_MOUSE	sp|P62137|PP1A_MOUSE	Serine/threonine-protein phosphatase PP1-alpha catalytic subunit OS=Mus musculus OX=10090 GN=Ppp1ca PE=1 SV=1	1	10	42.4	37.54	330	0	194.76	1//0	1//0	1//0	268270000	18	40			-1	14904000	956540	4953100	8994000	107550000	90578000	129750000				3.47842e+07	5.37503e+07	6.51948e+07	-0.247775	0.389168765743073	0.270727	0.533523537803138	0.518502	0.708670520231214	0.627842	0.519675925925926	0.906327	0.679636835278859	0.278485	0.679187817258883	31.856	79.4627	77.2603
sp|P62141|PP1B_MOUSE	Ppp1cb	sp|P62141|PP1B_MOUSE	sp|P62141|PP1B_MOUSE	Serine/threonine-protein phosphatase PP1-beta catalytic subunit OS=Mus musculus OX=10090 GN=Ppp1cb PE=1 SV=3	1	3	36.1	37.186	327	0	25.01	0//1	1//0	1//0	110940000	17	8			-1	6525800		1136600	5389200		37909000	66501000	SPL_6027	SPL_21358			1.50175e+07	4.48548e+07					0.810836	0.779190751445087					1.57861	0.867005076142132	0	18.2345	46.2943
sp|P62192|PRS4_MOUSE	Psmc1	sp|P62192|PRS4_MOUSE	sp|P62192|PRS4_MOUSE	26S proteasome regulatory subunit 4 OS=Mus musculus OX=10090 GN=Psmc1 PE=1 SV=1	1	22	68.6	49.184	440	0	323.31	1//0	1//0	1//0	727800000	26	65			-1	27992000	586090	19699000	7707300	65301000	641250000	190840000				4.00468e+07	1.3911e+08	8.26982e+07	3.29571	0.886649874055416	1.54719	0.878744650499287	-1.74852	0.247398843930636	1.79647	0.733796296296296	1.04617	0.708171206225681	-0.750302	0.453807106598985	19.5188	316.031	66.2073
sp|P62196|PRS8_MOUSE	Psmc5	sp|P62196|PRS8_MOUSE	sp|P62196|PRS8_MOUSE	26S proteasome regulatory subunit 8 OS=Mus musculus OX=10090 GN=Psmc5 PE=1 SV=1	1	19	61.1	45.626	406	0	323.31	1//0	1//0	1//0	899560000	24	77			-1	37481000	1395200	25132000	10954000	219070000	547870000	345860000				5.21308e+07	1.36734e+08	7.86334e+07	1.32244	0.691435768261965	0.658796	0.674750356633381	-0.663645	0.432369942196532	1.39116	0.665509259259259	0.593007	0.609597924773022	-0.798153	0.443654822335025	46.4648	403.193	94.0971
sp|P62242|RS8_MOUSE	Rps8	sp|P62242|RS8_MOUSE	sp|P62242|RS8_MOUSE	40S ribosomal protein S8 OS=Mus musculus OX=10090 GN=Rps8 PE=1 SV=2	1	15	55.8	24.205	208	0	323.31	1//0	1//0	1//0	1717800000	10	91			-1	171780000	30569000	123870000	17342000	1396500000	1486900000	290330000				5.22298e+08	4.58113e+08	6.85762e+07	0.090492	0.457178841309824	-2.26605	0.0613409415121255	-2.35654	0.180346820809249	-0.189169	0.392361111111111	-2.92909	0.0440985732814527	-2.73992	0.147208121827411	1018.05	1987.25	148.971
sp|P62245|RS15A_MOUSE	Rps15a	sp|P62245|RS15A_MOUSE	sp|P62245|RS15A_MOUSE	40S ribosomal protein S15a OS=Mus musculus OX=10090 GN=Rps15a PE=1 SV=2	1	9	60.8	14.839	130	0	160	1//0	1//0	1//0	882380000	9	41			-1	98043000	16297000	35769000	45977000	333040000	534280000	573940000				3.18091e+08	1.93696e+08	1.47069e+08	0.681901	0.590680100755667	0.785204	0.716119828815977	0.103304	0.609248554913295	-0.715645	0.293981481481481	-1.11294	0.220492866407263	-0.397297	0.536040609137056	542.745	573.843	394.952
sp|P62259|1433E_MOUSE	Ywhae	sp|P62259|1433E_MOUSE	sp|P62259|1433E_MOUSE	14-3-3 protein epsilon OS=Mus musculus OX=10090 GN=Ywhae PE=1 SV=1	1	13	64.7	29.174	255	0	175.43	1//0	1//0	1//0	513290000	17	52			-1	30194000	1668200	15493000	13033000	156830000	290940000	209070000				7.06523e+07	1.21886e+08	8.76341e+07	0.89152	0.629722921914358	0.414785	0.592011412268188	-0.476736	0.479768786127168	0.786722	0.556712962962963	0.310755	0.530479896238651	-0.475967	0.520812182741117	55.5566	248.554	111.956
sp|P62264|RS14_MOUSE	Rps14	sp|P62264|RS14_MOUSE	sp|P62264|RS14_MOUSE	40S ribosomal protein S14 OS=Mus musculus OX=10090 GN=Rps14 PE=1 SV=3	1	13	74.8	16.273	151	0	272.79	1//0	1//0	1//0	4398700000	4	129			-1	1099700000	233900000	493110000	372680000	4257800000	2512200000	1383300000				1.26115e+09	7.69624e+08	4.52194e+08	-0.761157	0.267002518891688	-1.62199	0.108416547788873	-0.860837	0.394219653179191	-0.712518	0.296296296296296	-1.47973	0.17769130998703	-0.767212	0.450761421319797	7789.65	7910.97	3201.4
sp|P62267|RS23_MOUSE	Rps23	sp|P62267|RS23_MOUSE	sp|P62267|RS23_MOUSE	40S ribosomal protein S23 OS=Mus musculus OX=10090 GN=Rps23 PE=1 SV=3	1	9	49	15.807	143	0	86.799	1//0	1//0	1//0	981380000	6	54			-1	163560000	23825000	81629000	58110000	814810000	483320000	272800000				3.14833e+08	2.33646e+08	1.51508e+08	-0.753485	0.270780856423174	-1.57862	0.118402282453638	-0.825135	0.402312138728324	-0.430261	0.344907407407407	-1.05519	0.226977950713359	-0.62493	0.484263959390863	793.452	1309.58	499.177
sp|P62270|RS18_MOUSE	Rps18	sp|P62270|RS18_MOUSE	sp|P62270|RS18_MOUSE	40S ribosomal protein S18 OS=Mus musculus OX=10090 GN=Rps18 PE=1 SV=3	1	25	73.7	17.718	152	0	323.31	1//0	1//0	1//0	23682000000	9	212			-1	2631300000	458620000	991300000	1181400000	17010000000	11953000000	11087000000				6.19272e+09	4.13555e+09	3.32689e+09	-0.50901	0.327455919395466	-0.617514	0.266761768901569	-0.108504	0.563005780346821	-0.582492	0.321759259259259	-0.896399	0.246433203631647	-0.313907	0.553299492385787	15273.6	15903.4	10148.5
sp|P62274|RS29_MOUSE	Rps29	sp|P62274|RS29_MOUSE	sp|P62274|RS29_MOUSE	40S ribosomal protein S29 OS=Mus musculus OX=10090 GN=Rps29 PE=1 SV=2	1	6	57.1	6.6767	56	0	286.12	1//0	1//0	1//0	3688800000	2	53			-1	1844400000	407820000	871340000	565240000	3664100000	1768500000	1594000000				2.06559e+09	1.2469e+09	5.53478e+08	-1.05093	0.21536523929471	-1.20081	0.158345221112696	-0.149875	0.553757225433526	-0.728204	0.291666666666667	-1.89996	0.125810635538262	-1.17175	0.364467005076142	13581.8	13978.9	4855.53
sp|P62281|RS11_MOUSE	Rps11	sp|P62281|RS11_MOUSE	sp|P62281|RS11_MOUSE	40S ribosomal protein S11 OS=Mus musculus OX=10090 GN=Rps11 PE=1 SV=3	1	13	53.2	18.431	158	0	194.1	1//0	1//0	1//0	2341700000	10	90			-1	234170000	45460000	116510000	72200000	2081400000	1295700000	875330000				8.06384e+08	5.04412e+08	2.37126e+08	-0.683823	0.285894206549118	-1.24966	0.152639087018545	-0.565833	0.458959537572254	-0.676866	0.304398148148148	-1.76581	0.147859922178988	-1.08895	0.386802030456853	1513.97	1869.17	620.213
sp|P62301|RS13_MOUSE	Rps13	sp|P62301|RS13_MOUSE	sp|P62301|RS13_MOUSE	40S ribosomal protein S13 OS=Mus musculus OX=10090 GN=Rps13 PE=1 SV=2	1	15	64.9	17.222	151	0	223.9	1//0	1//0	1//0	3827600000	9	134			-1	425290000	112910000	180640000	131730000	3821600000	2352000000	1668300000				1.57872e+09	6.60563e+08	3.50933e+08	-0.700289	0.283375314861461	-1.1958	0.161198288159772	-0.495509	0.477456647398844	-1.25699	0.21412037037037	-2.16949	0.0920881971465629	-0.912499	0.42741116751269	3760.28	2898.01	1131.59
sp|P62305|RUXE_MOUSE	Snrpe	sp|P62305|RUXE_MOUSE	sp|P62305|RUXE_MOUSE	Small nuclear ribonucleoprotein E OS=Mus musculus OX=10090 GN=Snrpe PE=1 SV=1	1	3	52.2	10.803	92	0	65.55	1//0	1//0	1//0	54210000	4	9			-1	13553000	1754100	11798000		37820000	54887000					1.84393e+07	3.66798e+07	0	0.537315	0.554156171284635					0.992204	0.599537037037037					58.4174	189.276	0
sp|P62307|RUXF_MOUSE	Snrpf	sp|P62307|RUXF_MOUSE	sp|P62307|RUXF_MOUSE	Small nuclear ribonucleoprotein F OS=Mus musculus OX=10090 GN=Snrpf PE=1 SV=1	1	2	39.5	9.7251	86	0	50.097	1//0	1//0	1//0	112380000	3	11			-1	37461000	2665700	19679000	15117000	40245000	64392000	41667000				2.10165e+07	4.58836e+07	2.22032e+07	0.678072	0.586901763224181	0.0500957	0.44793152639087	-0.627976	0.441618497109827	1.12645	0.62037037037037	0.0792407	0.447470817120623	-1.04721	0.39492385786802	88.7767	315.711	129.858
sp|P62309|RUXG_MOUSE	Snrpg	sp|P62309|RUXG_MOUSE	sp|P62309|RUXG_MOUSE	Small nuclear ribonucleoprotein G OS=Mus musculus OX=10090 GN=Snrpg PE=1 SV=1	1	3	26.3	8.496	76	0	20.962	1//0	1//0	1//0	111600000	3	10			-1	37201000	1254700	24622000	11324000	32648000	77439000	31374000				9.89229e+06	5.74112e+07	1.66324e+07	1.24607	0.682619647355164	-0.0574251	0.413694721825963	-1.30349	0.317919075144509	2.53696	0.842592592592593	0.749624	0.64591439688716	-1.78733	0.261928934010152	41.7857	395.011	97.2755
sp|P62315|SMD1_MOUSE	Snrpd1	sp|P62315|SMD1_MOUSE	sp|P62315|SMD1_MOUSE	Small nuclear ribonucleoprotein Sm D1 OS=Mus musculus OX=10090 GN=Snrpd1 PE=1 SV=1	1	3	37	13.281	119	0	45.928	1//0	1//0	1//0	117700000	4	13			-1	29425000	972760	21976000	6476600	26681000	95934000	31338000				1.02258e+07	6.83204e+07	1.26834e+07	1.84623	0.759445843828715	0.2321	0.517831669044223	-1.61413	0.268208092485549	2.74011	0.856481481481482	0.310736	0.529182879377432	-2.42937	0.185786802030457	32.3962	352.561	55.6353
sp|P62317|SMD2_MOUSE	Snrpd2	sp|P62317|SMD2_MOUSE	sp|P62317|SMD2_MOUSE	Small nuclear ribonucleoprotein Sm D2 OS=Mus musculus OX=10090 GN=Snrpd2 PE=1 SV=1	1	6	52.5	13.527	118	0	112.37	1//0	1//0	1//0	435560000	8	23			-1	54446000	415710	27270000	26759000	30404000	319730000	128180000				8.74e+06	1.19188e+08	1.04811e+08	3.39452	0.896725440806045	2.07584	0.925820256776034	-1.31868	0.314450867052023	3.76946	0.923611111111111	3.58401	0.972762645914397	-0.185453	0.582741116751269	13.8445	437.493	229.865
sp|P62320|SMD3_MOUSE	Snrpd3	sp|P62320|SMD3_MOUSE	sp|P62320|SMD3_MOUSE	Small nuclear ribonucleoprotein Sm D3 OS=Mus musculus OX=10090 GN=Snrpd3 PE=1 SV=1	1	6	54.8	13.916	126	0	140.2	1//0	1//0	1//0	496670000	6	38			-1	82778000	9887000	55936000	16955000	294580000	360890000	138390000				1.45391e+08	2.16615e+08	4.98061e+07	0.2929	0.5	-1.08992	0.181169757489301	-1.38282	0.304046242774566	0.575197	0.506944444444444	-1.54555	0.162127107652399	-2.12074	0.215228426395939	329.27	897.382	145.647
sp|P62334|PRS10_MOUSE	Psmc6	sp|P62334|PRS10_MOUSE	sp|P62334|PRS10_MOUSE	26S proteasome regulatory subunit 10B OS=Mus musculus OX=10090 GN=Psmc6 PE=1 SV=1	1	22	63	44.172	389	0	323.31	1//0	1//0	1//0	1508500000	20	108			-1	75424000	1596600	47812000	26015000	270860000	993710000	554250000				5.31563e+07	2.24269e+08	1.17125e+08	1.87528	0.76448362720403	1.03299	0.794579172610556	-0.842288	0.397687861271676	2.07692	0.775462962962963	1.13974	0.727626459143969	-0.937185	0.422335025380711	53.1721	767.049	223.474
sp|P62342|SELT_MOUSE	Selenot	sp|P62342|SELT_MOUSE	sp|P62342|SELT_MOUSE	Thioredoxin reductase-like selenoprotein T OS=Mus musculus OX=10090 GN=Selenot PE=1 SV=2	1	3	14.9	22.292	195	0	22.337	0//0	1//0	0//0	78293000	11	5			-1	7117500		7117500			100570000		SPL_6027		SPL_6027		6.08497e+07														0	114.186	0
sp|P62627|DLRB1_MOUSE	Dynlrb1	sp|P62627|DLRB1_MOUSE	sp|P62627|DLRB1_MOUSE	Dynein light chain roadblock-type 1 OS=Mus musculus OX=10090 GN=Dynlrb1 PE=1 SV=3	1	4	52.1	10.99	96	0	39.106	0//0	1//0	1//0	82656000	6	9			-1	13776000		8752600	5023400		54341000	40100000	SPL_6027	SPL_21358			3.81128e+07	1.47564e+07					-0.438439	0.492485549132948					-1.36894	0.334010152284264	0	140.418	43.152
sp|P62700|YPEL5_MOUSE	Ypel5	sp|P62700|YPEL5_MOUSE	sp|P62700|YPEL5_MOUSE	Protein yippee-like 5 OS=Mus musculus OX=10090 GN=Ypel5 PE=1 SV=1	1	4	44.6	13.841	121	0	137.22	1//0	1//0	1//0	325240000	7	28			-1	46463000	2524200	18839000	25099000	92337000	157230000	147990000				4.64354e+07	8.28668e+07	7.12191e+07	0.767896	0.605793450881612	0.680519	0.683309557774608	-0.0873768	0.567630057803468	0.83557	0.565972222222222	0.617039	0.614785992217899	-0.21853	0.575634517766497	84.0643	302.234	215.606
sp|P62702|RS4X_MOUSE	Rps4x	sp|P62702|RS4X_MOUSE	sp|P62702|RS4X_MOUSE	40S ribosomal protein S4, X isoform OS=Mus musculus OX=10090 GN=Rps4x PE=1 SV=2	1	25	65	29.597	263	0	323.31	1//0	1//0	1//0	6726600000	15	224			-1	448440000	74362000	231450000	142630000	5134100000	3747800000	2590400000				1.17431e+09	7.68487e+08	5.47813e+08	-0.454067	0.340050377833753	-0.986937	0.199714693295292	-0.532869	0.467052023121387	-0.611727	0.314814814814815	-1.10006	0.221789883268482	-0.488337	0.519796954314721	2476.5	3713.16	1225.22
sp|P62715|PP2AB_MOUSE	Ppp2cb	sp|P62715|PP2AB_MOUSE	sp|P62715|PP2AB_MOUSE	Serine/threonine-protein phosphatase 2A catalytic subunit beta isoform OS=Mus musculus OX=10090 GN=Ppp2cb PE=1 SV=1	1	16	68.3	35.575	309	0	323.31	1//0	1//0	1//0	1392500000	16	82			-1	87029000	5726400	34576000	46726000	467000000	600160000	704280000				1.69791e+08	2.61579e+08	1.83585e+08	0.361925	0.508816120906801	0.592727	0.656205420827389	0.230802	0.641618497109827	0.623491	0.518518518518518	0.112691	0.453955901426719	-0.5108	0.509644670050761	190.708	554.703	401.386
sp|P62717|RL18A_MOUSE	Rpl18a	sp|P62717|RL18A_MOUSE	sp|P62717|RL18A_MOUSE	60S ribosomal protein L18a OS=Mus musculus OX=10090 GN=Rpl18a PE=1 SV=1	1	8	40.3	20.732	176	0	66.884	1//0	1//0	0//0	183520000	9	15			-1	20391000	1920600	18471000		108480000	186330000			SPL_M	SPL_6027	4.54268e+07	8.81434e+07		0.780431	0.609571788413098					0.956308	0.591435185185185					63.9624	296.331	0
sp|P62751|RL23A_MOUSE	Rpl23a	sp|P62751|RL23A_MOUSE	sp|P62751|RL23A_MOUSE	60S ribosomal protein L23a OS=Mus musculus OX=10090 GN=Rpl23a PE=1 SV=1	1	17	61.5	17.695	156	0	323.31	1//0	1//0	1//0	5467900000	7	140			-1	781120000	163660000	364090000	253370000	5077000000	3089800000	1949500000				1.77222e+09	1.09889e+09	5.65385e+08	-0.716463	0.280856423173804	-1.38087	0.139800285306705	-0.664409	0.43121387283237	-0.689504	0.302083333333333	-1.64825	0.155642023346304	-0.958746	0.415228426395939	5450.43	5841.1	2176.5
sp|P62754|RS6_MOUSE	Rps6	sp|P62754|RS6_MOUSE	sp|P62754|RS6_MOUSE	40S ribosomal protein S6 OS=Mus musculus OX=10090 GN=Rps6 PE=1 SV=1	1	9	33.7	28.68	249	0	248.18	1//0	1//0	1//0	1144300000	9	76			-1	127140000	29315000	67318000	30512000	929500000	926130000	406150000				3.78968e+08	2.18461e+08	1.34446e+08	-0.00524015	0.431989924433249	-1.19444	0.16262482168331	-1.1892	0.338728323699422	-0.794698	0.28125	-1.49504	0.173800259403372	-0.700347	0.467005076142132	976.288	1079.98	262.104
sp|P62806|H4_MOUSE	H4c1	sp|P62806|H4_MOUSE	sp|P62806|H4_MOUSE	Histone H4 OS=Mus musculus OX=10090 GN=H4c1 PE=1 SV=2	1	12	68	11.367	103	0	152.41	1//0	1//0	1//0	2192600000	6	81			-1	365440000	35791000	194080000	135570000	1106100000	1267500000	794050000				2.94977e+08	5.09324e+08	3.32413e+08	0.196504	0.481108312342569	-0.47818	0.299572039942939	-0.674684	0.428901734104046	0.787981	0.55787037037037	0.172372	0.476005188067445	-0.615609	0.486294416243655	1191.96	3113.63	1164.57
sp|P62814|VATB2_MOUSE	Atp6v1b2	sp|P62814|VATB2_MOUSE	sp|P62814|VATB2_MOUSE	V-type proton ATPase subunit B, brain isoform OS=Mus musculus OX=10090 GN=Atp6v1b2 PE=1 SV=1	1	17	52.6	56.55	511	0	250	1//0	1//0	1//0	929440000	25	76			-1	37178000	3217000	11849000	22111000	385790000	341510000	496150000				1.0799e+08	1.21873e+08	2.00314e+08	-0.175888	0.404282115869018	0.362961	0.576319543509273	0.538849	0.716763005780347	0.174483	0.457175925925926	0.891363	0.67704280155642	0.71688	0.756345177664975	107.137	190.094	189.938
sp|P62821|RAB1A_MOUSE	Rab1A	sp|P62821|RAB1A_MOUSE	sp|P62821|RAB1A_MOUSE	Ras-related protein Rab-1A OS=Mus musculus OX=10090 GN=Rab1A PE=1 SV=3	1	6	62.9	22.677	205	0	146.97	1//0	1//0	0//0	209250000	15	23			-1	13950000	505980	13444000		50765000	253610000			SPL_M	SPL_6027	1.99454e+07	9.77918e+07		2.32071	0.819899244332494					2.29366	0.805555555555556					16.8508	215.682	0
sp|P62827|RAN_MOUSE	Ran	sp|P62827|RAN_MOUSE;sp|Q61820|RANT_MOUSE	sp|P62827|RAN_MOUSE	GTP-binding nuclear protein Ran OS=Mus musculus OX=10090 GN=Ran PE=1 SV=3	2	13	50.9	24.423	216	0	115.31	1//0	1//0	1//0	828870000	10	64			-1;-1	82887000	7472600	41198000	34217000	384030000	424270000	348530000				1.40032e+08	1.84267e+08	1.24955e+08	0.143764	0.464735516372796	-0.139936	0.386590584878745	-0.2837	0.529479768786127	0.396036	0.479166666666667	-0.164347	0.381322957198444	-0.560383	0.500507614213198	248.863	660.94	293.931
sp|P62830|RL23_MOUSE	Rpl23	sp|P62830|RL23_MOUSE	sp|P62830|RL23_MOUSE	60S ribosomal protein L23 OS=Mus musculus OX=10090 GN=Rpl23 PE=1 SV=1	1	16	71.4	14.865	140	0	270.6	1//0	1//0	1//0	3289600000	9	110			-1	365510000	84595000	144920000	135990000	3605600000	1495800000	1187800000				9.44774e+08	4.87995e+08	3.78709e+08	-1.26932	0.175062972292191	-1.60195	0.115549215406562	-0.332625	0.509826589595376	-0.953101	0.255787037037037	-1.31888	0.194552529182879	-0.365778	0.548223350253807	2817.3	2324.95	1168.18
sp|P62835|RAP1A_MOUSE	Rap1a	sp|P62835|RAP1A_MOUSE;sp|P35276|RAB3D_MOUSE	sp|P62835|RAP1A_MOUSE	Ras-related protein Rap-1A OS=Mus musculus OX=10090 GN=Rap1a PE=1 SV=1	2	3	60.3	20.987	184	0	37.522	0//1	1//0	0//1	55558000	10	4			-1;-1	5555800		5555800			70804000		SPL_6027		SPL_6027		4.31803e+07														0	89.1318	0
sp|P62843|RS15_MOUSE	Rps15	sp|P62843|RS15_MOUSE	sp|P62843|RS15_MOUSE	40S ribosomal protein S15 OS=Mus musculus OX=10090 GN=Rps15 PE=1 SV=2	1	9	64.1	17.04	145	0	323.31	1//0	1//0	1//0	2467200000	6	97			-1	411200000	82115000	222650000	106430000	1335400000	2285800000	893360000				1.24817e+09	7.90901e+08	2.57264e+08	0.775427	0.607052896725441	-0.579958	0.273894436519258	-1.35539	0.308670520231214	-0.65824	0.306712962962963	-2.27849	0.0843060959792477	-1.62025	0.289340101522843	2734.7	3571.98	914.256
sp|P62849-2|RS24_MOUSE	Rps24	sp|P62849-2|RS24_MOUSE;sp|P62849-3|RS24_MOUSE;sp|P62849|RS24_MOUSE	sp|P62849-2|RS24_MOUSE;sp|P62849-3|RS24_MOUSE;sp|P62849|RS24_MOUSE	Isoform 2 of 40S ribosomal protein S24 OS=Mus musculus OX=10090 GN=Rps24;Isoform 3 of 40S ribosomal protein S24 OS=Mus musculus OX=10090 GN=Rps24;40S ribosomal protein S24 OS=Mus musculus OX=10090 GN=Rps24 PE=1 SV=1	3	7	45.4	15.069	130	0	87.092	1//0	1//0	1//0	861560000	6	47			-1;-1;-1	143590000	45072000	67271000	31249000	1251400000	496420000	178760000				6.13202e+08	3.05138e+08	9.17972e+07	-1.33391	0.162468513853904	-2.80745	0.0385164051355207	-1.47354	0.291329479768786	-1.0069	0.247685185185185	-2.73984	0.0544747081712062	-1.73294	0.271065989847716	1501.05	1079.23	268.435
sp|P62852|RS25_MOUSE	Rps25	sp|P62852|RS25_MOUSE	sp|P62852|RS25_MOUSE	40S ribosomal protein S25 OS=Mus musculus OX=10090 GN=Rps25 PE=1 SV=1	1	8	39.2	13.742	125	0	94.882	1//0	1//0	1//0	2179000000	5	53			-1	435800000	124090000	165760000	145950000	2519600000	1107900000	939110000				1.32271e+09	5.29338e+08	3.57291e+08	-1.18537	0.192695214105793	-1.42383	0.12981455064194	-0.238462	0.53757225433526	-1.32123	0.207175925925926	-1.88833	0.127107652399481	-0.567092	0.499492385786802	4132.61	2659.29	1253.74
sp|P62855|RS26_MOUSE	Rps26	sp|P62855|RS26_MOUSE	sp|P62855|RS26_MOUSE	40S ribosomal protein S26 OS=Mus musculus OX=10090 GN=Rps26 PE=1 SV=3	1	4	44.3	13.015	115	0	79.125	1//0	1//0	1//0	736500000	5	38			-1	147300000	19772000	61722000	65807000	432950000	274870000	415050000				2.31385e+08	1.97531e+08	1.61093e+08	-0.655451	0.293450881612091	-0.0609153	0.412268188302425	0.594536	0.726011560693642	-0.228218	0.385416666666667	-0.522405	0.313878080415045	-0.294187	0.558375634517767	658.474	990.207	565.296
sp|P62858|RS28_MOUSE	Rps28	sp|P62858|RS28_MOUSE	sp|P62858|RS28_MOUSE	40S ribosomal protein S28 OS=Mus musculus OX=10090 GN=Rps28 PE=1 SV=1	1	5	40.6	7.8409	69	0	58.388	1//0	1//0	0//0	233270000	3	24			-1	77757000	18161000	59596000		275890000	208980000			SPL_M	SPL_6027	1.19809e+08	1.12099e+08		-0.400728	0.355163727959698					-0.0959637	0.408564814814815					604.822	956.1	0
sp|P62862|RS30_MOUSE	Fau	sp|P62862|RS30_MOUSE	sp|P62862|RS30_MOUSE	40S ribosomal protein S30 OS=Mus musculus OX=10090 GN=Fau PE=1 SV=1	1	4	20.3	6.6478	59	0	29.846	1//0	1//0	0//0	456130000	2	24			-1	228060000	178700000	49361000		1643200000	140570000			SPL_M	SPL_6027	9.16698e+08	7.67281e+07		-3.54715	0.0214105793450882					-3.57862	0.0347222222222222					5951.31	791.899	0
sp|P62869|ELOB_MOUSE	Elob	sp|P62869|ELOB_MOUSE	sp|P62869|ELOB_MOUSE	Elongin-B OS=Mus musculus OX=10090 GN=Elob PE=1 SV=1	1	9	91.5	13.17	118	0	171.47	1//0	1//0	1//0	920590000	9	46			-1	102290000	8515700	44333000	49438000	391080000	463670000	402650000				1.54794e+08	2.31501e+08	1.77385e+08	0.245635	0.493702770780856	0.0420626	0.446504992867332	-0.203572	0.547976878612717	0.580669	0.509259259259259	0.196532	0.48378728923476	-0.384136	0.538071065989848	283.601	711.235	424.683
sp|P62874|GBB1_MOUSE	Gnb1	sp|P62874|GBB1_MOUSE;sp|Q61011|GBB3_MOUSE	sp|P62874|GBB1_MOUSE	Guanine nucleotide-binding protein G(I)/G(S)/G(T) subunit beta-1 OS=Mus musculus OX=10090 GN=Gnb1 PE=1 SV=3	2	12	72.9	37.377	340	0	323.31	1//0	1//0	1//0	3639000000	13	80			-1;-1	279920000	6190300	183890000	89845000	527690000	2999900000	963340000				1.81753e+08	1.25472e+09	4.61608e+08	2.50715	0.836272040302267	0.868354	0.747503566333809	-1.6388	0.265895953757225	2.78732	0.865740740740741	1.34469	0.771725032425422	-1.44263	0.323857868020305	206.158	2950.15	771.787
sp|P62878|RBX1_MOUSE	Rbx1	sp|P62878|RBX1_MOUSE	sp|P62878|RBX1_MOUSE	E3 ubiquitin-protein ligase RBX1 OS=Mus musculus OX=10090 GN=Rbx1 PE=1 SV=1	1	6	51.9	12.274	108	0	115.25	1//0	1//0	1//0	235420000	3	22			-1	78474000	450140	54727000	23297000	19936000	199670000	58110000				3.54883e+06	1.08763e+08	3.42179e+07	3.32417	0.889168765743073	1.54341	0.875891583452211	-1.78076	0.242774566473988	4.9377	0.974537037037037	3.26933	0.963683527885863	-1.66837	0.283248730964467	14.9912	877.986	200.126
sp|P62880|GBB2_MOUSE	Gnb2	sp|P62880|GBB2_MOUSE	sp|P62880|GBB2_MOUSE	Guanine nucleotide-binding protein G(I)/G(S)/G(T) subunit beta-2 OS=Mus musculus OX=10090 GN=Gnb2 PE=1 SV=3	1	20	86.8	37.331	340	0	323.31	1//0	1//0	1//0	5609400000	13	164			-1	431490000	17220000	265690000	148580000	1261600000	3810100000	2066700000				3.50304e+08	1.38722e+09	5.67192e+08	1.59457	0.722921914357683	0.712074	0.691868758915835	-0.8825	0.389595375722543	1.98552	0.756944444444444	0.695229	0.631647211413748	-1.29029	0.343147208121827	573.484	4262.47	1276.33
sp|P62889|RL30_MOUSE	Rpl30	sp|P62889|RL30_MOUSE	sp|P62889|RL30_MOUSE	60S ribosomal protein L30 OS=Mus musculus OX=10090 GN=Rpl30 PE=1 SV=2	1	6	58.3	12.784	115	0	163.38	1//0	1//0	1//0	336780000	6	35			-1	56131000	35921000	16325000	3884900	994350000	120610000	30277000				4.2574e+08	7.61288e+07	1.1412e+07	-3.0434	0.0340050377833753	-5.03746	0.0114122681883024	-1.99406	0.217341040462428	-2.48346	0.106481481481481	-5.22135	0.0103761348897536	-2.73789	0.149238578680203	1196.29	261.902	33.3721
sp|P62892|RL39_MOUSE	Rpl39	sp|P62892|RL39_MOUSE	sp|P62892|RL39_MOUSE	60S ribosomal protein L39 OS=Mus musculus OX=10090 GN=Rpl39 PE=1 SV=2	1	3	25.5	6.4066	51	0	75.404	1//0	1//0	1//0	2491300000	1	38			-1	2491300000	975640000	999420000	516190000	4397800000	1398100000	430810000				2.56398e+09	7.76759e+08	2.52731e+08	-1.65331	0.138539042821159	-3.35166	0.0285306704707561	-1.69834	0.258959537572254	-1.72284	0.172453703703704	-3.34271	0.0389105058365759	-1.61986	0.290355329949239	32492.1	16033.7	4434.18
sp|P62900|RL31_MOUSE	Rpl31	sp|P62900|RL31_MOUSE	sp|P62900|RL31_MOUSE	60S ribosomal protein L31 OS=Mus musculus OX=10090 GN=Rpl31 PE=1 SV=1	1	10	57.6	14.463	125	0	97.162	1//0	1//0	1//0	4689800000	7	63			-1	669970000	171980000	329310000	168690000	5414600000	2904600000	1301800000				2.47712e+09	1.39248e+09	5.04265e+08	-0.898515	0.241813602015113	-2.05635	0.0699001426533524	-1.15783	0.345664739884393	-0.831012	0.274305555555556	-2.29641	0.0817120622568093	-1.4654	0.317766497461929	5727.51	5283.13	1449.08
sp|P62908|RS3_MOUSE	Rps3	sp|P62908|RS3_MOUSE	sp|P62908|RS3_MOUSE	40S ribosomal protein S3 OS=Mus musculus OX=10090 GN=Rps3 PE=1 SV=1	1	29	82.7	26.674	243	0	323.31	1//0	1//0	1//0	9606800000	19	278			-1	505620000	67421000	131920000	306280000	5180700000	2735000000	6117700000				1.50136e+09	6.69426e+08	1.00029e+09	-0.921606	0.234256926952141	0.239842	0.523537803138374	1.16145	0.841618497109827	-1.16528	0.226851851851852	-0.58586	0.299610894941634	0.579415	0.730964467005076	2245.35	2116.39	2631.01
sp|P62911|RL32_MOUSE	Rpl32	sp|P62911|RL32_MOUSE;sp|P17932|RL32P_MOUSE	sp|P62911|RL32_MOUSE	60S ribosomal protein L32 OS=Mus musculus OX=10090 GN=Rpl32 PE=1 SV=2	2	11	50.4	15.86	135	0	209.48	1//0	1//0	1//0	1670400000	8	63			-1;-1	208800000	32287000	111990000	64528000	1252600000	954800000	582890000				4.94793e+08	4.78761e+08	2.3368e+08	-0.391655	0.357682619647355	-1.10363	0.176890156918688	-0.711975	0.423121387283237	-0.0475198	0.414351851851852	-1.08229	0.22568093385214	-1.03477	0.4	1075.27	1796.66	554.309
sp|P62918|RL8_MOUSE	Rpl8	sp|P62918|RL8_MOUSE	sp|P62918|RL8_MOUSE	60S ribosomal protein L8 OS=Mus musculus OX=10090 GN=Rpl8 PE=1 SV=2	1	15	44.7	28.024	257	0	169.73	1//0	1//0	1//0	1122600000	11	73			-1	102050000	15277000	66611000	20162000	726240000	938620000	259710000				3.02488e+08	3.10514e+08	1.08582e+08	0.370095	0.511335012594458	-1.48354	0.125534950071327	-1.85364	0.230057803468208	0.0377793	0.429398148148148	-1.47809	0.178988326848249	-1.51587	0.308629441624366	508.775	1068.64	173.196
sp|P62960|YBOX1_MOUSE	Ybx1	sp|P62960|YBOX1_MOUSE;sp|Q9Z2C8-2|YBOX2_MOUSE;sp|Q9JKB3-2|YBOX3_MOUSE;sp|Q9Z2C8|YBOX2_MOUSE;sp|Q9JKB3|YBOX3_MOUSE	sp|P62960|YBOX1_MOUSE	Y-box-binding protein 1 OS=Mus musculus OX=10090 GN=Ybx1 PE=1 SV=3	5	8	34.2	35.73	322	0	241.41	1//0	1//0	1//0	315190000	12	41			-1;-1;-1;-1;-1	26266000	9673400	7251500	9341000	451830000	135840000	156410000				2.01958e+08	5.76334e+07	5.16859e+07	-1.73387	0.125944584382872	-1.53045	0.122681883024251	0.203424	0.635838150289017	-1.80908	0.165509259259259	-1.96621	0.115434500648508	-0.157134	0.588832487309645	322.157	116.336	80.2411
sp|P62983|RS27A_MOUSE	Rps27a	sp|P62983|RS27A_MOUSE;sp|P62984|RL40_MOUSE;sp|P0CG49|UBB_MOUSE;sp|P0CG50|UBC_MOUSE	sp|P62983|RS27A_MOUSE	Ubiquitin-40S ribosomal protein S27a OS=Mus musculus OX=10090 GN=Rps27a PE=1 SV=2	4	4	36.5	17.951	156	0	95.573	1//0	1//0	1//0	295520000	6	30			-1;-1;-1;-1	49254000	17230000	31516000	507700	477750000	242060000	6443600				2.44321e+08	1.40093e+08	1.49141e+06	-0.980891	0.22544080604534	-6.21225	0.00285306704707561	-5.23135	0.0312138728323699	-0.802395	0.278935185185185	-7.35596	0.00259403372243839	-6.55357	0.00609137055837563	573.817	505.612	4.36125
sp|P63001|RAC1_MOUSE	Rac1	sp|P63001|RAC1_MOUSE;sp|P60764|RAC3_MOUSE	sp|P63001|RAC1_MOUSE;sp|P60764|RAC3_MOUSE	Ras-related C3 botulinum toxin substrate 1 OS=Mus musculus OX=10090 GN=Rac1 PE=1 SV=1;Ras-related C3 botulinum toxin substrate 3 OS=Mus musculus OX=10090 GN=Rac3 PE=1 SV=1	2	3	38	21.45	192	0	21.478	0//1	1//0	1//0	102150000	7	9			-1;-1	14593000		4385400	10208000		35484000	64261000	SPL_6027	SPL_21358			2.38585e+07	3.49841e+07					0.856775	0.791907514450867					0.552199	0.725888324873096	0	70.355	87.6888
sp|P63002|TLE5_MOUSE	Tle5	sp|P63002|TLE5_MOUSE;sp|P63002-2|TLE5_MOUSE	sp|P63002|TLE5_MOUSE;sp|P63002-2|TLE5_MOUSE	TLE family member 5 OS=Mus musculus OX=10090 GN=Tle5 PE=1 SV=1;Isoform 2 of TLE family member 5 OS=Mus musculus OX=10090 GN=Tle5	2	2	12.2	22	197	0.0011648	14.501	0//0	1//0	1//0	29860000	8	3			-1;-1	3732600		2045900	1686600		22171000		SPL_6027	SPL_21358			1.2721e+07	6.60616e+06											-0.945331	0.418274111675127	0	32.8224	14.4882
sp|P63017|HSP7C_MOUSE	Hspa8	sp|P63017|HSP7C_MOUSE;sp|P17156|HSP72_MOUSE	sp|P63017|HSP7C_MOUSE	Heat shock cognate 71 kDa protein OS=Mus musculus OX=10090 GN=Hspa8 PE=1 SV=1	2	42	79.4	70.87	646	0	323.31	1//0	1//0	1//0	24740000000	33	429			-1;-1	749700000	44535000	283710000	421450000	6887000000	11690000000	11943000000				1.16762e+09	2.35317e+09	2.16163e+09	0.763327	0.604534005037783	0.794218	0.718972895863053	0.0308903	0.591907514450867	1.01103	0.603009259259259	0.888552	0.675745784695201	-0.122481	0.6	1483.16	4551.56	3620.34
sp|P63024|VAMP3_MOUSE	Vamp3	sp|P63024|VAMP3_MOUSE;sp|P63044|VAMP2_MOUSE	sp|P63024|VAMP3_MOUSE	Vesicle-associated membrane protein 3 OS=Mus musculus OX=10090 GN=Vamp3 PE=1 SV=1	2	3	39.8	11.48	103	0	66.636	0//0	1//0	0//0	43043000	5	4			-1;-1	8608600		8608600			53637000		SPL_6027		SPL_6027		3.34529e+07														0	138.108	0
sp|P63037|DNJA1_MOUSE	Dnaja1	sp|P63037|DNJA1_MOUSE	sp|P63037|DNJA1_MOUSE	DnaJ homolog subfamily A member 1 OS=Mus musculus OX=10090 GN=Dnaja1 PE=1 SV=1	1	22	68.3	44.868	397	0	323.31	1//0	1//0	1//0	3679200000	19	171			-1	193640000	14223000	77070000	102350000	1234000000	1549600000	1974200000				4.55355e+08	6.34996e+08	6.2418e+08	0.328553	0.507556675062972	0.677926	0.68188302425107	0.349372	0.663583815028902	0.479755	0.493055555555556	0.45497	0.577172503242542	-0.0247851	0.612182741116751	473.674	1236.44	879.208
sp|P63038|CH60_MOUSE	Hspd1	sp|P63038|CH60_MOUSE;sp|P63038-2|CH60_MOUSE	sp|P63038|CH60_MOUSE	60 kDa heat shock protein, mitochondrial OS=Mus musculus OX=10090 GN=Hspd1 PE=1 SV=1	2	41	72.6	60.955	573	0	323.31	1//0	1//0	1//0	4568200000	33	310			-1;-1	138430000	11931000	65030000	61470000	1881500000	2543000000	1878500000				2.8829e+08	3.62402e+08	2.73542e+08	0.434648	0.526448362720403	-0.00230217	0.437945791726106	-0.43695	0.49364161849711	0.330073	0.475694444444444	-0.0757576	0.407263294422827	-0.40583	0.53502538071066	397.342	1043.28	528.04
sp|P63073|IF4E_MOUSE	Eif4e	sp|P63073|IF4E_MOUSE	sp|P63073|IF4E_MOUSE	Eukaryotic translation initiation factor 4E OS=Mus musculus OX=10090 GN=Eif4e PE=1 SV=1	1	6	26.7	25.053	217	0	57.384	1//0	1//0	1//0	609620000	11	49			-1	55420000	9243900	8764800	37411000	551230000	143890000	257400000				2.53264e+08	5.68798e+07	1.84539e+08	-1.93769	0.0994962216624685	-1.09864	0.179743223965763	0.839046	0.784971098265896	-2.15465	0.128472222222222	-0.456712	0.326848249027237	1.69794	0.874111675126904	307.853	140.614	321.368
sp|P63085|MK01_MOUSE	Mapk1	sp|P63085|MK01_MOUSE;sp|Q6P5G0|MK04_MOUSE;sp|Q61532|MK06_MOUSE	sp|P63085|MK01_MOUSE	Mitogen-activated protein kinase 1 OS=Mus musculus OX=10090 GN=Mapk1 PE=1 SV=3	3	3	19.3	41.275	358	0	21.378	0//0	0//0	1//0	63323000	22	5			-1;-1;-1	2878300			2878300			53858000		SPL_21358	SPL_21358			3.10026e+07													0	0	24.7252
sp|P63094-2|GNAS2_MOUSE	Gnas	sp|P63094-2|GNAS2_MOUSE;sp|P63094|GNAS2_MOUSE;sp|Q6R0H7-4|GNAS1_MOUSE;sp|Q6R0H7|GNAS1_MOUSE;sp|P63094-3|GNAS2_MOUSE	sp|P63094-2|GNAS2_MOUSE;sp|P63094|GNAS2_MOUSE;sp|Q6R0H7-4|GNAS1_MOUSE;sp|Q6R0H7|GNAS1_MOUSE;sp|P63094-3|GNAS2_MOUSE	Isoform Gnas-2 of Guanine nucleotide-binding protein G(s) subunit alpha isoforms short OS=Mus musculus OX=10090 GN=Gnas;Guanine nucleotide-binding protein G(s) subunit alpha isoforms short OS=Mus musculus OX=10090 GN=Gnas PE=1 SV=1;Isoform XLas-4 of Guanin	5	3	15	44.265	380	0	23.394	0//0	1//0	0//0	19608000	19	5			-1;-1;-1;-1;-1	1032000		1032000			24801000		SPL_6027		SPL_6027		1.52396e+07														0	16.5564	0
sp|P63101|1433Z_MOUSE	Ywhaz	sp|P63101|1433Z_MOUSE	sp|P63101|1433Z_MOUSE	14-3-3 protein zeta/delta OS=Mus musculus OX=10090 GN=Ywhaz PE=1 SV=1	1	17	75.9	27.771	245	0	323.31	1//0	1//0	1//0	1223600000	14	85			-1	87400000	4382000	35397000	47620000	286760000	506520000	705260000				1.08283e+08	1.53467e+08	2.06143e+08	0.820775	0.618387909319899	1.29831	0.83737517831669	0.477536	0.70635838150289	0.503124	0.496527777777778	0.928844	0.686121919584955	0.42572	0.705583756345178	145.935	567.875	409.066
sp|P63213|GBG2_MOUSE	Gng2	sp|P63213|GBG2_MOUSE	sp|P63213|GBG2_MOUSE	Guanine nucleotide-binding protein G(I)/G(S)/G(O) subunit gamma-2 OS=Mus musculus OX=10090 GN=Gng2 PE=1 SV=2	1	5	78.9	7.8501	71	0	78.231	1//0	1//0	1//0	266070000	4	18			-1	66519000	4801600	47186000	14531000	94831000	228740000	56269000				5.04744e+07	1.3215e+08	2.84572e+07	1.27028	0.68639798488665	-0.753018	0.243937232524964	-2.0233	0.213872832369942	1.38855	0.662037037037037	-0.826756	0.254215304798962	-2.21531	0.206091370558376	159.909	757.006	124.824
sp|P63254|CRIP1_MOUSE	Crip1	sp|P63254|CRIP1_MOUSE	sp|P63254|CRIP1_MOUSE	Cysteine-rich protein 1 OS=Mus musculus OX=10090 GN=Crip1 PE=1 SV=2	1	4	59.7	8.5497	77	0	50.732	1//0	1//0	1//0	1095000000	4	44			-1	273740000	90644000	57329000	125770000	1514900000	353140000	486890000				9.52845e+08	1.78228e+08	2.46307e+08	-2.10091	0.0856423173803526	-1.63755	0.106990014265335	0.463356	0.702890173410405	-2.41852	0.111111111111111	-1.95179	0.116731517509728	0.466732	0.708629441624365	3018.75	919.73	1080.39
sp|P63260|ACTG_MOUSE	Actg1	sp|P63260|ACTG_MOUSE	sp|P63260|ACTG_MOUSE	Actin, cytoplasmic 2 OS=Mus musculus OX=10090 GN=Actg1 PE=1 SV=1	1	2	99.2	41.792	375	0	179.16	1//0	1//0	1//0	460760000	20	20			-1	23038000	2209000	17881000	2948100	172620000	504880000	56713000				1.161e+08	2.7794e+08	2.88675e+07	1.54834	0.716624685138539	-1.60585	0.111269614835949	-3.15419	0.123699421965318	1.2594	0.640046296296296	-2.00785	0.107652399481193	-3.26726	0.099492385786802	73.5671	286.865	25.3248
sp|P63276|RS17_MOUSE	Rps17	sp|P63276|RS17_MOUSE	sp|P63276|RS17_MOUSE	40S ribosomal protein S17 OS=Mus musculus OX=10090 GN=Rps17 PE=1 SV=2	1	12	65.9	15.524	135	0	323.31	1//0	1//0	1//0	1514300000	5	100			-1	302850000	79174000	110730000	112950000	1717400000	661120000	650880000				5.96602e+08	2.6766e+08	2.15313e+08	-1.37724	0.159949622166247	-1.39976	0.134094151212553	-0.0225206	0.58150289017341	-1.15637	0.228009259259259	-1.47033	0.180285343709468	-0.313967	0.552284263959391	2636.76	1776.44	970.264
sp|P63321|RALA_MOUSE	Rala	sp|P63321|RALA_MOUSE	sp|P63321|RALA_MOUSE	Ras-related protein Ral-A OS=Mus musculus OX=10090 GN=Rala PE=1 SV=1	1	4	23.8	23.553	206	0	75.93	0//0	1//0	1//0	96070000	10	11			-1	9607000		9074100	532950		105320000	18794000	SPL_6027	SPL_21358			6.65738e+07	2.6093e+06					-2.48644	0.167630057803468					-4.67322	0.0375634517766497	0	145.576	4.57815
sp|P63323|RS12_MOUSE	Rps12	sp|P63323|RS12_MOUSE	sp|P63323|RS12_MOUSE	40S ribosomal protein S12 OS=Mus musculus OX=10090 GN=Rps12 PE=1 SV=2	1	10	60.6	14.525	132	0	323.31	1//0	1//0	1//0	2146300000	7	68			-1	306610000	14900000	110180000	181530000	775160000	858220000	949970000				2.08481e+08	2.80994e+08	4.79113e+08	0.146853	0.468513853904282	0.293388	0.549215406562054	0.146534	0.621965317919075	0.430626	0.483796296296296	1.20045	0.745784695201038	0.769825	0.765482233502538	496.22	1767.62	1559.38
sp|P63325|RS10_MOUSE	Rps10	sp|P63325|RS10_MOUSE	sp|P63325|RS10_MOUSE	40S ribosomal protein S10 OS=Mus musculus OX=10090 GN=Rps10 PE=1 SV=1	1	16	72.1	18.916	165	0	323.31	1//0	1//0	1//0	4994100000	10	152			-1	499410000	84672000	234740000	180000000	4116200000	2475800000	1914900000				1.67491e+09	1.09101e+09	7.19076e+08	-0.733418	0.275818639798489	-1.10404	0.17546362339515	-0.370626	0.502890173410405	-0.618423	0.3125	-1.21987	0.206225680933852	-0.601443	0.491370558375635	2819.86	3765.94	1546.24
sp|P67778|PHB_MOUSE	Phb	sp|P67778|PHB_MOUSE	sp|P67778|PHB_MOUSE	Prohibitin OS=Mus musculus OX=10090 GN=Phb PE=1 SV=1	1	36	97.1	29.82	272	0	323.31	1//0	1//0	1//0	8247500000	17	188			-1	485150000	173030	448860000	36110000	19789000	9740500000	620440000				7.73048e+06	1.67349e+09	1.65451e+08	8.94315	1	4.97052	0.994293865905849	-3.97263	0.0774566473988439	7.75809	0.996527777777778	4.4197	0.988326848249027	-3.33839	0.0964467005076142	5.76248	7201.07	310.192
sp|P67871|CSK2B_MOUSE	Csnk2b	sp|P67871|CSK2B_MOUSE	sp|P67871|CSK2B_MOUSE	Casein kinase II subunit beta OS=Mus musculus OX=10090 GN=Csnk2b PE=1 SV=1	1	5	34	24.942	215	0	48.533	1//0	1//0	1//0	260310000	10	13			-1	26031000	910630	1269700	23851000		62109000	162100000				2.39311e+07	9.86803e+06	1.16774e+08					1.38401	0.869364161849711	-1.27805	0.211805555555556	2.28676	0.893644617380026	3.56481	0.978680203045685	30.327	20.3698	204.885
sp|P67984|RL22_MOUSE	Rpl22	sp|P67984|RL22_MOUSE	sp|P67984|RL22_MOUSE	60S ribosomal protein L22 OS=Mus musculus OX=10090 GN=Rpl22 PE=1 SV=2	1	6	47.7	14.759	128	0	77.386	1//0	1//0	1//0	433570000	4	30			-1	108390000	15318000	26739000	66336000	136970000	104920000	404000000				1.39242e+08	8.31275e+07	1.29912e+08	-0.38457	0.360201511335013	1.5605	0.880171184022825	1.94507	0.941040462427746	-0.744198	0.287037037037037	-0.100065	0.396887159533074	0.644133	0.745177664974619	510.141	428.974	569.84
sp|P68033|ACTC_MOUSE	Actc1	sp|P68033|ACTC_MOUSE;sp|P68134|ACTS_MOUSE	sp|P68033|ACTC_MOUSE;sp|P68134|ACTS_MOUSE	Actin, alpha cardiac muscle 1 OS=Mus musculus OX=10090 GN=Actc1 PE=1 SV=1;Actin, alpha skeletal muscle OS=Mus musculus OX=10090 GN=Acta1 PE=1 SV=1	2	15	90.5	42.019	377	0	323.31	1//0	1//0	1//0	9936200000	20	134			-1;-1	496810000	31433000	365460000	99919000	2531900000	9564700000	1919100000				1.6378e+09	4.66857e+09	9.78401e+08	1.9175	0.767002518891688	-0.399791	0.320970042796006	-2.31729	0.184971098265896	1.51122	0.689814814814815	-0.743265	0.27367055771725	-2.25448	0.203045685279188	1046.82	5863.08	858.325
sp|P68040|RACK1_MOUSE	Rack1	sp|P68040|RACK1_MOUSE	sp|P68040|RACK1_MOUSE	Receptor of activated protein C kinase 1 OS=Mus musculus OX=10090 GN=Rack1 PE=1 SV=3	1	4	18	35.076	317	0	34.431	1//0	0//0	1//0	61417000	20	6			-1	3070900	380310		2690600			45817000	SPL_M		SPL_21358	1.99887e+07		2.63455e+07									0.398371	0.553826199740597			12.6656	0	23.1128
sp|P68181-4|KAPCB_MOUSE	Prkacb	sp|P68181-4|KAPCB_MOUSE;sp|P68181-2|KAPCB_MOUSE;sp|P68181-3|KAPCB_MOUSE;sp|P68181|KAPCB_MOUSE;sp|P05132-2|KAPCA_MOUSE;sp|P05132|KAPCA_MOUSE	sp|P68181-4|KAPCB_MOUSE;sp|P68181-2|KAPCB_MOUSE;sp|P68181-3|KAPCB_MOUSE;sp|P68181|KAPCB_MOUSE	Isoform 4 of cAMP-dependent protein kinase catalytic subunit beta OS=Mus musculus OX=10090 GN=Prkacb;Isoform 2 of cAMP-dependent protein kinase catalytic subunit beta OS=Mus musculus OX=10090 GN=Prkacb;Isoform 3 of cAMP-dependent protein kinase catalytic s	6	4	13.6	46.013	398	0	35.151	0//0	1//0	1//0	34075000	21	8			-1;-1;-1;-1;-1;-1	1622600		742720	879900		10197000	24062000	SPL_6027	SPL_21358			1.21224e+07	9.04665e+06					1.23861	0.855491329479769					-0.42222	0.530964467005076	0	11.9155	7.55852
sp|P68254-2|1433T_MOUSE	Ywhaq	sp|P68254-2|1433T_MOUSE;sp|P68254|1433T_MOUSE	sp|P68254-2|1433T_MOUSE;sp|P68254|1433T_MOUSE	Isoform 2 of 14-3-3 protein theta OS=Mus musculus OX=10090 GN=Ywhaq;14-3-3 protein theta OS=Mus musculus OX=10090 GN=Ywhaq PE=1 SV=1	2	3	25.1	27.7	243	0	107.62	0//0	1//0	1//0	113340000	14	10			-1;-1	8095400		3095700	4999700		51194000	62999000	SPL_6027	SPL_21358			3.36844e+07	3.42702e+07					0.299354	0.652023121387283					0.0248752	0.628426395939086	0	49.6644	42.9485
sp|P68368|TBA4A_MOUSE	Tuba4a	sp|P68368|TBA4A_MOUSE	sp|P68368|TBA4A_MOUSE	Tubulin alpha-4A chain OS=Mus musculus OX=10090 GN=Tuba4a PE=1 SV=1	1	5	64.5	49.924	448	0	111.11	1//0	1//0	1//0	447700000	21	29			-1	21319000	603080	17775000	2940500	95551000	345440000	156220000				3.32827e+07	2.25433e+08	3.02332e+07	1.85409	0.761964735516373	0.709236	0.690442225392297	-1.14486	0.347976878612717	2.75985	0.858796296296296	-0.138641	0.38651102464332	-2.89849	0.131979695431472	20.0846	285.165	25.2595
sp|P68372|TBB4B_MOUSE	Tubb4b	sp|P68372|TBB4B_MOUSE;sp|Q9D6F9|TBB4A_MOUSE	sp|P68372|TBB4B_MOUSE;sp|Q9D6F9|TBB4A_MOUSE	Tubulin beta-4B chain OS=Mus musculus OX=10090 GN=Tubb4b PE=1 SV=1;Tubulin beta-4A chain OS=Mus musculus OX=10090 GN=Tubb4a PE=1 SV=3	2	35	83.1	49.83	445	0	323.31	1//0	1//0	1//0	13994000000	19	412			-1;-1	736500000	46303000	380570000	309630000	4438500000	9138100000	4780900000				8.52008e+08	1.60249e+09	1.1248e+09	1.04182	0.657430730478589	0.10721	0.462196861626248	-0.934612	0.38150289017341	0.911374	0.575231481481482	0.40073	0.556420233463035	-0.510645	0.510659898477157	1542.04	6105.49	2659.79
sp|P68373|TBA1C_MOUSE	Tuba1c	sp|P68373|TBA1C_MOUSE	sp|P68373|TBA1C_MOUSE	Tubulin alpha-1C chain OS=Mus musculus OX=10090 GN=Tuba1c PE=1 SV=1	1	3	82.6	49.909	449	0	120.74	0//1	1//0	1//0	378090000	21	12			-1	18004000		16820000	1184400		410580000	63202000	SPL_6027	SPL_21358			2.74522e+08	1.21775e+07					-2.69962	0.144508670520231					-4.49463	0.0416243654822335	0	269.844	10.1742
sp|P68510|1433F_MOUSE	Ywhah	sp|P68510|1433F_MOUSE	sp|P68510|1433F_MOUSE	14-3-3 protein eta OS=Mus musculus OX=10090 GN=Ywhah PE=1 SV=2	1	7	44.7	28.211	246	0	184.76	1//0	1//0	1//0	242300000	16	22			-1	15144000	428140	10598000	4117300	51839000	208590000	49195000				1.80022e+07	1.15268e+08	3.22528e+07	2.00856	0.78463476070529	-0.0755262	0.40941512125535	-2.08409	0.208092485549133	2.67875	0.850694444444444	0.841251	0.662775616083009	-1.83749	0.253807106598985	14.2585	170.024	35.3685
sp|P69566|RANB9_MOUSE	Ranbp9	sp|P69566|RANB9_MOUSE;sp|P69566-2|RANB9_MOUSE	sp|P69566|RANB9_MOUSE;sp|P69566-2|RANB9_MOUSE	Ran-binding protein 9 OS=Mus musculus OX=10090 GN=Ranbp9 PE=1 SV=1;Isoform 2 of Ran-binding protein 9 OS=Mus musculus OX=10090 GN=Ranbp9	2	11	23.4	71.011	653	0	198.04	1//0	1//0	1//0	188850000	21	30			-1;-1	8993000	135630	7817700	1039700	13194000	214280000	15212000				7.48508e+06	6.78619e+07	1.06895e+07	4.02154	0.925692695214106	0.205328	0.50641940085592	-3.81622	0.0855491329479769	3.18051	0.900462962962963	0.514109	0.595330739299611	-2.6664	0.159390862944162	4.51693	125.419	8.93124
sp|P70168|IMB1_MOUSE	Kpnb1	sp|P70168|IMB1_MOUSE	sp|P70168|IMB1_MOUSE	Importin subunit beta-1 OS=Mus musculus OX=10090 GN=Kpnb1 PE=1 SV=2	1	27	48.7	97.183	876	0	323.31	1//0	1//0	1//0	4051400000	35	152			-1	115760000	2167500	45876000	67712000	508970000	1993600000	1924100000				1.49586e+08	4.38094e+08	5.332e+08	1.96972	0.779596977329975	1.91853	0.91583452211127	-0.0511922	0.576878612716763	1.55027	0.697916666666667	1.8337	0.849546044098573	0.283434	0.682233502538071	72.185	735.989	581.66
sp|P70191|TRAF5_MOUSE	Traf5	sp|P70191|TRAF5_MOUSE	sp|P70191|TRAF5_MOUSE	TNF receptor-associated factor 5 OS=Mus musculus OX=10090 GN=Traf5 PE=1 SV=1	1	3	5.4	64.144	558	0.00061425	17.733	0//0	1//0	1//0	149840000	39	2			-1	3842100		110810	3731300			123730000	SPL_6027	SPL_21358			3.35888e+06	7.1246e+07											4.40676	0.991878172588832	0	1.77773	32.0526
sp|P70195|PSB7_MOUSE	Psmb7	sp|P70195|PSB7_MOUSE	sp|P70195|PSB7_MOUSE	Proteasome subunit beta type-7 OS=Mus musculus OX=10090 GN=Psmb7 PE=1 SV=1	1	2	13.7	29.891	277	0.0011319	13.273	0//0	1//0	1//0	25082000	11	3			-1	2280200		511340	1768800		7028500		SPL_6027	SPL_21358			4.37159e+06	9.52606e+06											1.12372	0.819289340101523	0	8.20344	15.1944
sp|P70224|GIMA1_MOUSE	Gimap1	sp|P70224|GIMA1_MOUSE	sp|P70224|GIMA1_MOUSE	GTPase IMAP family member 1 OS=Mus musculus OX=10090 GN=Gimap1 PE=1 SV=3	1	2	9.4	30.828	277	0.0011723	14.881	0//0	1//0	0//0	13967000	18	4			-1	775920		775920			17459000		SPL_6027		SPL_6027		1.08549e+07														0	12.4481	0
sp|P70227|ITPR3_MOUSE	Itpr3	sp|P70227|ITPR3_MOUSE	sp|P70227|ITPR3_MOUSE	Inositol 1,4,5-trisphosphate receptor type 3 OS=Mus musculus OX=10090 GN=Itpr3 PE=1 SV=3	1	11	6.4	304.27	2670	0	90.168	0//0	1//0	1//0	123430000	137	15			-1	900980		721820	179160		120400000		SPL_6027	SPL_21358			3.38304e+07	1.2017e+07											-1.49324	0.316751269035533	0	11.5802	1.53902
sp|P70288|HDAC2_MOUSE	Hdac2	sp|P70288|HDAC2_MOUSE	sp|P70288|HDAC2_MOUSE	Histone deacetylase 2 OS=Mus musculus OX=10090 GN=Hdac2 PE=1 SV=1	1	3	25.8	55.302	488	0.0011926	15.777	1//0	1//0	1//0	11264000	21	4			-1	536360	379610	156750		25585000	17642000					2.09498e+07	2.55843e+06	0	-0.536284	0.32367758186398					-3.03361	0.0497685185185185					12.6423	2.51474	0
sp|P70290|EM55_MOUSE	Mpp1	sp|P70290|EM55_MOUSE	sp|P70290|EM55_MOUSE	55 kDa erythrocyte membrane protein OS=Mus musculus OX=10090 GN=Mpp1 PE=1 SV=1	1	6	16.1	52.227	466	0	39.034	1//0	1//0	1//0	88970000	25	13			-1	3558800	384570	185060	2989200	50864000	21654000	42667000				2.52667e+07	3.59585e+06	3.01208e+07	-1.23201	0.182619647355164	-0.253524	0.356633380884451	0.978487	0.808092485549133	-2.81283	0.0671296296296296	0.253525	0.504539559014267	3.06635	0.961421319796954	12.8075	2.96892	25.6778
sp|P70295|AUP1_MOUSE	Aup1	sp|P70295|AUP1_MOUSE	sp|P70295|AUP1_MOUSE	Lipid droplet-regulating VLDL assembly factor AUP1 OS=Mus musculus OX=10090 GN=Aup1 PE=1 SV=1	1	7	32.9	46.121	410	0	56.481	1//0	1//0	1//0	81799000	16	12			-1	5112500		3718900	1393600		80704000					0	4.09879e+07	1.09169e+07											-1.90864	0.240609137055838	0	59.6624	11.9713
sp|P70302|STIM1_MOUSE	Stim1	sp|P70302|STIM1_MOUSE	sp|P70302|STIM1_MOUSE	Stromal interaction molecule 1 OS=Mus musculus OX=10090 GN=Stim1 PE=1 SV=2	1	8	12.8	77.566	685	0	58.605	0//0	1//0	1//0	131420000	31	16			-1	4239400		4239400			157890000		SPL_6027	SPL_21358			6.62576e+07	0													0	68.0128	0
sp|P70303|PYRG2_MOUSE	Ctps2	sp|P70303|PYRG2_MOUSE;sp|P70303-3|PYRG2_MOUSE;sp|P70303-2|PYRG2_MOUSE;sp|P70698|PYRG1_MOUSE	sp|P70303|PYRG2_MOUSE;sp|P70303-3|PYRG2_MOUSE;sp|P70303-2|PYRG2_MOUSE	CTP synthase 2 OS=Mus musculus OX=10090 GN=Ctps2 PE=1 SV=1;Isoform 3 of CTP synthase 2 OS=Mus musculus OX=10090 GN=Ctps2;Isoform 2 of CTP synthase 2 OS=Mus musculus OX=10090 GN=Ctps2	4	15	31.7	65.514	586	0	142.9	1//0	1//0	1//0	309330000	29	28			-1;-1;-1;-1	10666000	1289700	1471500	7905200	175930000	71697000	175990000				5.62313e+07	2.96268e+07	5.97284e+07	-1.29502	0.167506297229219	0.00049194	0.439372325249643	1.29551	0.86242774566474	-0.92447	0.261574074074074	0.0870458	0.448767833981842	1.01152	0.798984771573604	42.9513	23.6073	67.9073
sp|P70315|WASP_MOUSE	Was	sp|P70315|WASP_MOUSE	sp|P70315|WASP_MOUSE	Wiskott-Aldrich syndrome protein homolog OS=Mus musculus OX=10090 GN=Was PE=1 SV=1	1	4	8.7	54.191	520	0	49.06	1//0	1//0	0//0	37592000	19	9			-1	1978500	86706	1891800		22194000	30580000			SPL_M	SPL_6027	4.32934e+06	2.79367e+07		0.462419	0.535264483627204					2.68994	0.853009259259259					2.8876	30.3502	0
sp|P70333|HNRH2_MOUSE	Hnrnph2	sp|P70333|HNRH2_MOUSE	sp|P70333|HNRH2_MOUSE	Heterogeneous nuclear ribonucleoprotein H2 OS=Mus musculus OX=10090 GN=Hnrnph2 PE=1 SV=1	1	2	24.7	49.279	449	0	18.72	0//1	1//0	0//1	19441000	18	5			-1	1080100		1080100			25517000		SPL_6027		SPL_6027		1.51099e+07														0	17.3281	0
sp|P70372|ELAV1_MOUSE	Elavl1	sp|P70372|ELAV1_MOUSE	sp|P70372|ELAV1_MOUSE	ELAV-like protein 1 OS=Mus musculus OX=10090 GN=Elavl1 PE=1 SV=2	1	3	11	36.169	326	0	34.841	1//0	1//0	1//0	48011000	15	8			-1	3200700	138200	1599100	1463400	20434000	21059000					5.44787e+06	1.86428e+07	1.07471e+07	0.0434653	0.447103274559194					1.77485	0.728009259259259	0.980186	0.691309987029831	-0.794667	0.444670050761421	4.60252	25.6544	12.5709
sp|P70429-2|EVL_MOUSE	Evl	sp|P70429-2|EVL_MOUSE;sp|P70429|EVL_MOUSE	sp|P70429-2|EVL_MOUSE;sp|P70429|EVL_MOUSE	Isoform 1 of Ena/VASP-like protein OS=Mus musculus OX=10090 GN=Evl;Ena/VASP-like protein OS=Mus musculus OX=10090 GN=Evl PE=1 SV=2	2	10	35.9	42.122	393	0	85.865	1//0	1//0	1//0	337190000	20	34			-1;-1	16859000	2939200	1247400	12673000	286650000	32063000	204160000				1.26985e+08	1.93895e+07	1.06264e+08	-3.16031	0.0277078085642317	-0.48959	0.295292439372325	2.67072	0.98150289017341	-2.7113	0.0821759259259259	-0.256999	0.356679636835279	2.45431	0.928934010152284	97.8852	20.0121	108.864
sp|P70452|STX4_MOUSE	Stx4	sp|P70452|STX4_MOUSE	sp|P70452|STX4_MOUSE	Syntaxin-4 OS=Mus musculus OX=10090 GN=Stx4 PE=1 SV=1	1	14	59.7	34.165	298	0	226.16	1//0	1//0	1//0	1013800000	15	40			-1	67589000	316680	65216000	2055500	11363000	1241400000	13731000				1.24835e+07	6.06078e+08	1.50952e+07	6.77148	0.98992443324937	0.273093	0.534950071326676	-6.49839	0.0092485549132948	5.60142	0.986111111111111	0.274073	0.517509727626459	-5.32734	0.0203045685279188	10.5465	1046.26	17.6572
sp|P70460|VASP_MOUSE	Vasp	sp|P70460|VASP_MOUSE	sp|P70460|VASP_MOUSE	Vasodilator-stimulated phosphoprotein OS=Mus musculus OX=10090 GN=Vasp PE=1 SV=4	1	9	33.3	39.666	375	0	188.51	1//0	1//0	1//0	698680000	17	43			-1	41099000	7190900	3469500	30439000	418060000	116590000	544490000				2.28392e+08	3.66313e+07	2.26962e+08	-1.84227	0.107052896725441	0.381196	0.579172610556348	2.22346	0.964161849710983	-2.64036	0.0891203703703704	-0.00905726	0.424124513618677	2.6313	0.941116751269035	239.481	55.6612	261.477
sp|P70662-2|LDB1_MOUSE	Ldb1	sp|P70662-2|LDB1_MOUSE;sp|P70662-3|LDB1_MOUSE;sp|P70662|LDB1_MOUSE;sp|O55203-3|LDB2_MOUSE;sp|O55203-2|LDB2_MOUSE;sp|O55203|LDB2_MOUSE	sp|P70662-2|LDB1_MOUSE;sp|P70662-3|LDB1_MOUSE;sp|P70662|LDB1_MOUSE	Isoform 2 of LIM domain-binding protein 1 OS=Mus musculus OX=10090 GN=Ldb1;Isoform 3 of LIM domain-binding protein 1 OS=Mus musculus OX=10090 GN=Ldb1;LIM domain-binding protein 1 OS=Mus musculus OX=10090 GN=Ldb1 PE=1 SV=2	6	4	15.7	36.667	319	0	34.941	0//0	1//0	1//0	144540000	11	7			-1;-1;-1;-1;-1;-1	13140000		497800	12642000			117660000	SPL_6027	SPL_21358			4.25594e+06	6.80836e+07											3.99976	0.985786802030457	0	7.98621	108.597
sp|P70677|CASP3_MOUSE	Casp3	sp|P70677|CASP3_MOUSE	sp|P70677|CASP3_MOUSE	Caspase-3 OS=Mus musculus OX=10090 GN=Casp3 PE=1 SV=1	1	3	14.4	31.474	277	0	23.682	0//0	0//0	1//0	114720000	16	3			-1	7169900			7169900			96693000		SPL_21358	SPL_21358			5.61655e+07													0	0	61.5909
sp|P80313|TCPH_MOUSE	Cct7	sp|P80313|TCPH_MOUSE	sp|P80313|TCPH_MOUSE	T-complex protein 1 subunit eta OS=Mus musculus OX=10090 GN=Cct7 PE=1 SV=1	1	26	61.8	59.652	544	0	323.31	1//0	1//0	1//0	1228200000	29	122			-1	42353000	3344000	11142000	27867000	388970000	465000000	709280000				1.27891e+08	8.33704e+07	1.39757e+08	0.257572	0.496221662468514	0.866696	0.746077032810271	0.609125	0.730635838150289	-0.617312	0.313657407407407	0.128	0.460440985732815	0.745312	0.763451776649746	111.366	178.751	239.383
sp|P80314|TCPB_MOUSE	Cct2	sp|P80314|TCPB_MOUSE	sp|P80314|TCPB_MOUSE	T-complex protein 1 subunit beta OS=Mus musculus OX=10090 GN=Cct2 PE=1 SV=4	1	32	74.2	57.477	535	0	323.31	1//0	1//0	1//0	2311000000	32	181			-1	72219000	6252200	19779000	46188000	916130000	728860000	1371800000				1.65728e+08	1.19018e+08	2.49793e+08	-0.329911	0.369017632241814	0.582446	0.654778887303852	0.912357	0.798843930635838	-0.477629	0.337962962962963	0.59192	0.608300907911803	1.06955	0.812182741116751	208.219	317.315	396.764
sp|P80315|TCPD_MOUSE	Cct4	sp|P80315|TCPD_MOUSE	sp|P80315|TCPD_MOUSE	T-complex protein 1 subunit delta OS=Mus musculus OX=10090 GN=Cct4 PE=1 SV=3	1	25	66.8	58.066	539	0	323.31	1//0	1//0	1//0	1950000000	32	137			-1	60939000	5555000	15825000	39559000	860040000	582330000	1097800000				2.51276e+08	1.31765e+08	2.86455e+08	-0.562567	0.316120906801008	0.35214	0.572039942938659	0.914706	0.8	-0.931309	0.259259259259259	0.189039	0.479896238651102	1.12035	0.818274111675127	185	253.881	339.82
sp|P80316|TCPE_MOUSE	Cct5	sp|P80316|TCPE_MOUSE	sp|P80316|TCPE_MOUSE	T-complex protein 1 subunit epsilon OS=Mus musculus OX=10090 GN=Cct5 PE=1 SV=1	1	29	68.2	59.623	541	0	323.31	1//0	1//0	1//0	2576000000	31	162			-1	83097000	5570400	20182000	57344000	967490000	781240000	1373300000				1.72391e+08	1.7016e+08	3.74215e+08	-0.308481	0.370277078085642	0.505328	0.62339514978602	0.813809	0.780346820809249	-0.0187965	0.423611111111111	1.11818	0.72503242542153	1.13698	0.821319796954315	185.513	323.78	492.597
sp|P80317|TCPZ_MOUSE	Cct6a	sp|P80317|TCPZ_MOUSE;sp|Q61390|TCPW_MOUSE	sp|P80317|TCPZ_MOUSE	T-complex protein 1 subunit zeta OS=Mus musculus OX=10090 GN=Cct6a PE=1 SV=3	2	23	59.1	58.004	531	0	323.31	1//0	1//0	1//0	2333600000	26	153			-1;-1	89755000	7375100	31417000	50964000	991580000	856700000	1206300000				1.99425e+08	1.93413e+08	2.69534e+08	-0.210939	0.396725440806045	0.282788	0.542082738944365	0.493727	0.707514450867052	-0.0441602	0.415509259259259	0.434621	0.573281452658885	0.478781	0.710659898477157	245.616	504.023	437.791
sp|P80318|TCPG_MOUSE	Cct3	sp|P80318|TCPG_MOUSE	sp|P80318|TCPG_MOUSE	T-complex protein 1 subunit gamma OS=Mus musculus OX=10090 GN=Cct3 PE=1 SV=1	1	29	69.2	60.629	545	0	323.31	1//0	1//0	1//0	3039800000	32	170			-1	94994000	9130100	27447000	58417000	1374300000	1158800000	1546000000				3.32747e+08	1.89182e+08	3.1699e+08	-0.246065	0.39168765743073	0.169843	0.48074179743224	0.415909	0.685549132947977	-0.814647	0.277777777777778	-0.0699897	0.408560311284047	0.744657	0.76243654822335	304.063	440.333	501.814
sp|P83870|PHF5A_MOUSE	Phf5a	sp|P83870|PHF5A_MOUSE	sp|P83870|PHF5A_MOUSE	PHD finger-like domain-containing protein 5A OS=Mus musculus OX=10090 GN=Phf5a PE=1 SV=1	1	3	40	12.405	110	0	72.484	1//0	1//0	1//0	119490000	8	16			-1	14936000	2737000	8229800	3969400	78132000	75784000	61114000				5.75437e+07	5.11708e+07	1.55472e+07	-0.0440203	0.423173803526448	-0.354411	0.326676176890157	-0.31039	0.517919075144509	-0.169336	0.395833333333333	-1.888	0.1284046692607	-1.71867	0.275126903553299	91.1513	132.031	34.098
sp|P83882|RL36A_MOUSE	Rpl36a	sp|P83882|RL36A_MOUSE	sp|P83882|RL36A_MOUSE	60S ribosomal protein L36a OS=Mus musculus OX=10090 GN=Rpl36a PE=3 SV=2	1	5	33	12.441	106	0	60.029	1//0	1//0	1//0	804420000	4	24			-1	201110000	91720000	105510000	3877000	1888900000	336180000	35854000				9.35609e+08	3.28013e+08	7.59274e+06	-2.49024	0.0629722921914358	-5.71927	0.00570613409415121	-3.22903	0.117919075144509	-1.51215	0.189814814814815	-6.94514	0.00389105058365759	-5.43299	0.017258883248731	3054.58	1692.7	33.3042
sp|P83887|TBG1_MOUSE	Tubg1	sp|P83887|TBG1_MOUSE;sp|Q8VCK3|TBG2_MOUSE	sp|P83887|TBG1_MOUSE;sp|Q8VCK3|TBG2_MOUSE	Tubulin gamma-1 chain OS=Mus musculus OX=10090 GN=Tubg1 PE=1 SV=1;Tubulin gamma-2 chain OS=Mus musculus OX=10090 GN=Tubg2 PE=1 SV=1	2	13	54.8	51.1	451	0	172.27	1//0	1//0	1//0	251090000	21	36			-1;-1	11957000	269030	10479000	1208800	24241000	275840000	24286000				1.48473e+07	8.29429e+07	1.24277e+07	3.50831	0.903022670025189	0.00267568	0.442225392296719	-3.50563	0.101734104046243	2.48191	0.832175925925926	-0.256639	0.357976653696498	-2.73855	0.148223350253807	8.9596	168.115	10.3838
sp|P83940|ELOC_MOUSE	Eloc	sp|P83940|ELOC_MOUSE	sp|P83940|ELOC_MOUSE	Elongin-C OS=Mus musculus OX=10090 GN=Eloc PE=1 SV=1	1	8	66.1	12.473	112	0	63.128	1//0	1//0	0//0	116190000	7	32			-1	16599000	11053000	5545200		346740000	65218000			SPL_M	SPL_6027	1.37739e+08	3.01687e+07		-2.41051	0.0654911838790932					-2.19081	0.127314814814815					368.102	88.9617	0
sp|P84078|ARF1_MOUSE	Arf1	sp|P84078|ARF1_MOUSE;sp|P61205|ARF3_MOUSE	sp|P84078|ARF1_MOUSE;sp|P61205|ARF3_MOUSE	ADP-ribosylation factor 1 OS=Mus musculus OX=10090 GN=Arf1 PE=1 SV=2;ADP-ribosylation factor 3 OS=Mus musculus OX=10090 GN=Arf3 PE=2 SV=2	2	13	81.2	20.697	181	0	244.31	1//0	1//0	1//0	647360000	10	53			-1;-1	64736000	446170	50954000	13336000	27139000	620830000	148890000				1.17252e+07	2.55779e+08	6.52912e+07	4.51576	0.948362720403023	2.45581	0.945791726105564	-2.05995	0.21271676300578	4.44721	0.953703703703704	2.47727	0.915693904020752	-1.96993	0.231472081218274	14.859	817.456	114.559
sp|P84084|ARF5_MOUSE	Arf5	sp|P84084|ARF5_MOUSE	sp|P84084|ARF5_MOUSE	ADP-ribosylation factor 5 OS=Mus musculus OX=10090 GN=Arf5 PE=1 SV=2	1	5	73.9	20.529	180	0	38.762	1//0	1//0	1//0	157670000	11	16			-1	14334000	651650	9963400	3718500	41122000	121630000	43785000				1.88376e+07	7.64234e+07	2.00264e+07	1.56452	0.719143576826196	0.0905263	0.46077032810271	-1.47399	0.290173410404624	2.0204	0.766203703703704	0.0882903	0.450064850843061	-1.93211	0.23756345177665	21.7021	159.843	31.9427
sp|P84089|ERH_MOUSE	Erh	sp|P84089|ERH_MOUSE	sp|P84089|ERH_MOUSE	Enhancer of rudimentary homolog OS=Mus musculus OX=10090 GN=Erh PE=1 SV=1	1	3	26	12.259	104	0	51.563	1//0	1//0	1//0	241080000	5	15			-1	48215000	7451500	19131000	21633000	129400000	114790000	139480000				9.79116e+07	7.43423e+07	5.29571e+07	-0.172841	0.405541561712846	0.108221	0.466476462196862	0.281061	0.64971098265896	-0.397297	0.351851851851852	-0.886656	0.250324254215305	-0.48936	0.518781725888325	248.16	306.919	185.832
sp|P84091|AP2M1_MOUSE	Ap2m1	sp|P84091|AP2M1_MOUSE	sp|P84091|AP2M1_MOUSE	AP-2 complex subunit mu OS=Mus musculus OX=10090 GN=Ap2m1 PE=1 SV=1	1	2	6.9	49.654	435	0.0011834	15.301	0//0	1//0	0//0	19730000	26	4			-1	758850		758850			25005000		SPL_6027		SPL_6027		1.53344e+07														0	12.1742	0
sp|P84096|RHOG_MOUSE	Rhog	sp|P84096|RHOG_MOUSE	sp|P84096|RHOG_MOUSE	Rho-related GTP-binding protein RhoG OS=Mus musculus OX=10090 GN=Rhog PE=1 SV=1	1	15	84.8	21.308	191	0	323.31	1//0	1//0	1//0	1389500000	11	61			-1	126320000	6080200	65599000	54640000	293950000	936940000	517000000				1.2893e+08	2.88745e+08	2.94271e+08	1.67239	0.734256926952141	0.814594	0.72753209700428	-0.857792	0.395375722543353	1.16321	0.626157407407407	1.19056	0.740596627756161	0.0273481	0.631472081218274	202.491	1052.41	469.369
sp|P84099|RL19_MOUSE	Rpl19	sp|P84099|RL19_MOUSE	sp|P84099|RL19_MOUSE	60S ribosomal protein L19 OS=Mus musculus OX=10090 GN=Rpl19 PE=1 SV=1	1	8	28.1	23.466	196	0	104.96	1//0	1//0	1//0	624590000	6	42			-1	104100000	17067000	62269000	24763000	545250000	375380000	162050000				2.41385e+08	2.2775e+08	6.66429e+07	-0.538566	0.321158690176322	-1.75048	0.0984308131241084	-1.21191	0.334104046242775	-0.0838881	0.41087962962963	-1.85681	0.132295719844358	-1.77293	0.263959390862944	568.388	998.983	212.719
sp|P84104-2|SRSF3_MOUSE	Srsf3	sp|P84104-2|SRSF3_MOUSE;sp|P84104|SRSF3_MOUSE;sp|Q8BL97-3|SRSF7_MOUSE;sp|Q8BL97-4|SRSF7_MOUSE;sp|Q8BL97-2|SRSF7_MOUSE;sp|Q8BL97|SRSF7_MOUSE	sp|P84104-2|SRSF3_MOUSE;sp|P84104|SRSF3_MOUSE	Isoform Short of Serine/arginine-rich splicing factor 3 OS=Mus musculus OX=10090 GN=Srsf3;Serine/arginine-rich splicing factor 3 OS=Mus musculus OX=10090 GN=Srsf3 PE=1 SV=1	6	8	56.5	14.203	124	0	65.081	1//0	1//0	1//0	382560000	8	38			-1;-1;-1;-1;-1;-1	47820000	17045000	20992000	9782300	627960000	195880000	88886000				2.67322e+08	1.14421e+08	3.83143e+07	-1.6807	0.134760705289673	-2.82064	0.0370898716119829	-1.13994	0.35028901734104	-1.22422	0.217592592592593	-2.80263	0.0505836575875486	-1.5784	0.300507614213198	567.656	336.775	84.032
sp|P84228|H32_MOUSE	H3c2	sp|P84228|H32_MOUSE	sp|P84228|H32_MOUSE	Histone H3.2 OS=Mus musculus OX=10090 GN=H3c2 PE=1 SV=2	1	7	52.9	15.388	136	0	122.17	1//0	1//0	1//0	826710000	4	31			-1	206680000	38401000	68523000	99753000	726490000	349420000	322130000				4.03676e+08	1.62218e+08	1.60056e+08	-1.05598	0.214105793450882	-1.1733	0.166904422253923	-0.117319	0.560693641618497	-1.31526	0.208333333333333	-1.33462	0.190661478599222	-0.0193646	0.615228426395939	1278.88	1099.32	856.899
sp|P85094|ISC2A_MOUSE	Isoc2a	sp|P85094|ISC2A_MOUSE	sp|P85094|ISC2A_MOUSE	Isochorismatase domain-containing protein 2A OS=Mus musculus OX=10090 GN=Isoc2a PE=1 SV=1	1	11	73.8	22.417	206	0	267.36	1//0	1//0	1//0	2390000000	8	100			-1	298750000	180070000	47550000	71130000	6458400000	582000000	610210000				3.07231e+09	1.99724e+08	2.36422e+08	-3.47209	0.0226700251889169	-3.4038	0.0242510699001427	0.0682867	0.6	-3.94324	0.0208333333333333	-3.69989	0.0324254215304799	0.243354	0.677157360406091	5996.93	762.845	611.021
sp|P97300-3|NPTN_MOUSE	Nptn	sp|P97300-3|NPTN_MOUSE;sp|P97300-1|NPTN_MOUSE;sp|P97300|NPTN_MOUSE;sp|P97300-4|NPTN_MOUSE	sp|P97300-3|NPTN_MOUSE;sp|P97300-1|NPTN_MOUSE;sp|P97300|NPTN_MOUSE	Isoform 3 of Neuroplastin OS=Mus musculus OX=10090 GN=Nptn;Isoform 1 of Neuroplastin OS=Mus musculus OX=10090 GN=Nptn;Neuroplastin OS=Mus musculus OX=10090 GN=Nptn PE=1 SV=3	4	6	22	30.821	277	0	47.73	0//0	1//0	0//0	160040000	13	19			-1;-1;-1;-1	12311000		12311000			205700000		SPL_6027		SPL_6027		1.01488e+08														0	197.506	0
sp|P97310|MCM2_MOUSE	Mcm2	sp|P97310|MCM2_MOUSE	sp|P97310|MCM2_MOUSE	DNA replication licensing factor MCM2 OS=Mus musculus OX=10090 GN=Mcm2 PE=1 SV=3	1	31	47.6	102.08	904	0	323.31	0//0	1//0	1//0	873050000	40	68			-1	21826000		20084000	1742200		1026900000	68682000	SPL_6027	SPL_21358			1.94922e+08	3.01077e+07					-3.90222	0.0797687861271676					-2.69469	0.156345177664975	0	322.208	14.9659
sp|P97311|MCM6_MOUSE	Mcm6	sp|P97311|MCM6_MOUSE	sp|P97311|MCM6_MOUSE	DNA replication licensing factor MCM6 OS=Mus musculus OX=10090 GN=Mcm6 PE=1 SV=1	1	39	55.2	92.866	821	0	323.31	1//0	1//0	1//0	1683300000	49	139			-1	34353000	81804	28508000	5762800	18039000	1659000000	356290000				1.05338e+07	2.76955e+08	7.95451e+07	6.52305	0.988664987405542	4.30386	0.988587731811698	-2.21919	0.197687861271676	4.71656	0.967592592592593	2.91675	0.948119325551232	-1.79981	0.257868020304569	2.72435	457.354	49.5036
sp|P97314|CSRP2_MOUSE	Csrp2	sp|P97314|CSRP2_MOUSE	sp|P97314|CSRP2_MOUSE	Cysteine and glycine-rich protein 2 OS=Mus musculus OX=10090 GN=Csrp2 PE=1 SV=3	1	12	64.2	20.926	193	0	229.39	1//0	1//0	1//0	655600000	11	48			-1	59600000	56753000	2320300	526640	2865200000	29785000	10383000				1.14112e+09	1.9837e+07	2.83623e+06	-6.58791	0.00251889168765743	-8.10827	0.0014265335235378	-1.52036	0.28092485549133	-5.84611	0.00231481481481481	-8.65226	0.0012970168612192	-2.80615	0.14010152284264	1890.06	37.2246	4.52395
sp|P97315|CSRP1_MOUSE	Csrp1	sp|P97315|CSRP1_MOUSE	sp|P97315|CSRP1_MOUSE	Cysteine and glycine-rich protein 1 OS=Mus musculus OX=10090 GN=Csrp1 PE=1 SV=3	1	10	64.2	20.583	193	0	164.04	1//0	1//0	1//0	435840000	11	38			-1	39622000	19798000	18574000	1251000	1008000000	256010000	14282000				4.99186e+08	1.18513e+08	6.73723e+06	-1.97722	0.0944584382871537	-6.14115	0.00427960057061341	-4.16393	0.0635838150289017	-2.07453	0.141203703703704	-6.21128	0.00518806744487678	-4.13675	0.049746192893401	659.34	297.983	10.7463
sp|P97351|RS3A_MOUSE	Rps3a	sp|P97351|RS3A_MOUSE	sp|P97351|RS3A_MOUSE	40S ribosomal protein S3a OS=Mus musculus OX=10090 GN=Rps3a PE=1 SV=3	1	22	65.9	29.885	264	0	323.31	1//0	1//0	1//0	3077800000	17	152			-1	181050000	37353000	80594000	63101000	2955700000	1469900000	1217700000				9.5201e+08	4.11542e+08	3.62394e+08	-1.00778	0.221662468513854	-1.27934	0.151212553495007	-0.271559	0.531791907514451	-1.20994	0.22337962962963	-1.39342	0.189364461738003	-0.183478	0.583756345177665	1243.98	1292.97	542.051
sp|P97352|S10AD_MOUSE	S100a13	sp|P97352|S10AD_MOUSE	sp|P97352|S10AD_MOUSE	Protein S100-A13 OS=Mus musculus OX=10090 GN=S100a13 PE=1 SV=1	1	2	36.7	11.158	98	0	55.755	0//0	1//0	0//0	55335000	6	3			-1	9222600		9222600			72121000		SPL_6027		SPL_6027		4.3007e+07														0	147.958	0
sp|P97363|SPTC2_MOUSE	Sptlc2	sp|P97363|SPTC2_MOUSE	sp|P97363|SPTC2_MOUSE	Serine palmitoyltransferase 2 OS=Mus musculus OX=10090 GN=Sptlc2 PE=1 SV=2	1	11	21.2	62.981	560	0	200.97	0//0	1//0	0//0	141230000	31	23			-1	4555900		4555900			175420000		SPL_6027		SPL_6027		5.3533e+07														0	73.0904	0
sp|P97370|AT1B3_MOUSE	Atp1b3	sp|P97370|AT1B3_MOUSE	sp|P97370|AT1B3_MOUSE	Sodium/potassium-transporting ATPase subunit beta-3 OS=Mus musculus OX=10090 GN=Atp1b3 PE=1 SV=1	1	13	53.6	31.775	278	0	151.47	0//0	1//0	0//0	678320000	12	37			-1	56527000		56527000			869480000		SPL_6027		SPL_6027		3.43073e+08														0	906.864	0
sp|P97371|PSME1_MOUSE	Psme1	sp|P97371|PSME1_MOUSE	sp|P97371|PSME1_MOUSE	Proteasome activator complex subunit 1 OS=Mus musculus OX=10090 GN=Psme1 PE=1 SV=2	1	32	85.9	28.673	249	0	323.31	1//0	1//0	1//0	27822000000	15	354			-1	1854800000	140890000	240390000	1473600000	9572600000	4541100000	18939000000				2.37976e+09	1.30595e+09	5.88194e+09	-1.07587	0.212846347607053	0.984377	0.781740370898716	2.06025	0.951445086705202	-0.865716	0.271990740740741	1.30548	0.765239948119325	2.17119	0.915736040609137	4692.11	3856.58	12658.5
sp|P97372|PSME2_MOUSE	Psme2	sp|P97372|PSME2_MOUSE	sp|P97372|PSME2_MOUSE	Proteasome activator complex subunit 2 OS=Mus musculus OX=10090 GN=Psme2 PE=1 SV=4	1	25	87.9	27.057	239	0	323.31	1//0	1//0	1//0	6598300000	15	206			-1	439880000	21696000	63505000	354680000	1493400000	1175100000	4617300000				5.1329e+08	3.7841e+08	1.5547e+09	-0.345817	0.365239294710327	1.62845	0.888730385164051	1.97427	0.945664739884393	-0.439826	0.34375	1.59879	0.815823605706874	2.03862	0.900507614213198	722.549	1018.81	3046.77
sp|P97377-2|CDK2_MOUSE	Cdk2	sp|P97377-2|CDK2_MOUSE;sp|P97377|CDK2_MOUSE;sp|Q80YP0|CDK3_MOUSE;sp|Q80YP0-2|CDK3_MOUSE	sp|P97377-2|CDK2_MOUSE;sp|P97377|CDK2_MOUSE	Isoform CDK2-alpha of Cyclin-dependent kinase 2 OS=Mus musculus OX=10090 GN=Cdk2;Cyclin-dependent kinase 2 OS=Mus musculus OX=10090 GN=Cdk2 PE=1 SV=2	4	10	38.9	33.887	298	0	65.855	1//0	1//0	1//0	246100000	19	27			-1;-1;-1;-1	12952000	2146500	4151900	6654000	177280000	100880000	121800000				6.55046e+07	5.60777e+07	6.18979e+07	-0.81339	0.255667506297229	-0.541516	0.282453637660485	0.271874	0.647398843930636	-0.224171	0.387731481481481	-0.0817067	0.40337224383917	0.142464	0.649746192893401	71.4856	66.609	57.1592
sp|P97390|VPS45_MOUSE	Vps45	sp|P97390|VPS45_MOUSE	sp|P97390|VPS45_MOUSE	Vacuolar protein sorting-associated protein 45 OS=Mus musculus OX=10090 GN=Vps45 PE=1 SV=1	1	4	7.9	65.052	570	0	27.091	0//0	1//0	1//0	30374000	32	6			-1	949180		949180			38319000		SPL_6027	SPL_21358			2.36068e+07	0													0	15.2277	0
sp|P97430|SLPI_MOUSE	Slpi	sp|P97430|SLPI_MOUSE	sp|P97430|SLPI_MOUSE	Antileukoproteinase OS=Mus musculus OX=10090 GN=Slpi PE=1 SV=1	1	2	15.3	14.308	131	0.001108	12.517	1//0	0//0	0//0	5574200	10	3			-1	557420	557420			25162000			SPL_M	SPL_M		1.46492e+07															18.564	0	0
sp|P97450|ATP5J_MOUSE	Atp5pf	sp|P97450|ATP5J_MOUSE	sp|P97450|ATP5J_MOUSE	ATP synthase-coupling factor 6, mitochondrial OS=Mus musculus OX=10090 GN=Atp5pf PE=1 SV=1	1	9	55.6	12.496	108	0	167.75	1//0	1//0	1//0	942910000	6	44			-1	157150000	360500	121650000	35144000	22393000	806420000	287720000				5.68433e+06	3.76414e+08	1.03238e+08	5.17041	0.963476070528967	3.68355	0.980028530670471	-1.48687	0.285549132947977	6.04918	0.991898148148148	4.18285	0.981841763942931	-1.86634	0.248730964467005	12.0059	1951.63	301.894
sp|P97461|RS5_MOUSE	Rps5	sp|P97461|RS5_MOUSE	sp|P97461|RS5_MOUSE	40S ribosomal protein S5 OS=Mus musculus OX=10090 GN=Rps5 PE=1 SV=3	1	19	70.6	22.889	204	0	323.31	1//0	1//0	1//0	4541800000	10	134			-1	454180000	13853000	265790000	174530000	870010000	3031100000	1654800000				1.70852e+08	9.85472e+08	4.7715e+08	1.80074	0.7544080604534	0.927553	0.768901569186876	-0.873185	0.393063583815029	2.52807	0.83912037037037	1.48169	0.795071335927367	-1.04637	0.395939086294416	461.351	4264.07	1499.25
sp|P97496-2|SMRC1_MOUSE	Smarcc1	sp|P97496-2|SMRC1_MOUSE;sp|P97496|SMRC1_MOUSE	sp|P97496-2|SMRC1_MOUSE;sp|P97496|SMRC1_MOUSE	Isoform 2 of SWI/SNF complex subunit SMARCC1 OS=Mus musculus OX=10090 GN=Smarcc1;SWI/SNF complex subunit SMARCC1 OS=Mus musculus OX=10090 GN=Smarcc1 PE=1 SV=2	2	2	9.5	120.09	1075	0.0011179	12.912	0//1	1//0	1//0	30271000	46	5			-1;-1	658070		194440	463630		17649000	13666000	SPL_6027	SPL_21358			6.95147e+06	1.04417e+07					-0.368995	0.504046242774566					0.586961	0.731979695431472	0	3.1194	3.98268
sp|P97742|CPT1A_MOUSE	Cpt1a	sp|P97742|CPT1A_MOUSE	sp|P97742|CPT1A_MOUSE	Carnitine O-palmitoyltransferase 1, liver isoform OS=Mus musculus OX=10090 GN=Cpt1a PE=1 SV=4	1	6	12.5	88.25	773	0	72.934	0//0	1//0	0//0	106350000	38	15			-1	2798600		2798600			131940000		SPL_6027		SPL_6027		6.9527e+07														0	44.898	0
sp|P97760|RPB3_MOUSE	Polr2c	sp|P97760|RPB3_MOUSE	sp|P97760|RPB3_MOUSE	DNA-directed RNA polymerase II subunit RPB3 OS=Mus musculus OX=10090 GN=Polr2c PE=1 SV=2	1	2	8.7	31.443	275	0.0021064	10.625	0//0	1//0	0//0	6393300	14	0			-1	456660		456660			8131500		SPL_6027		SPL_6027		4.96884e+06														0	7.3262	0
sp|P97807-2|FUMH_MOUSE	Fh	sp|P97807-2|FUMH_MOUSE;sp|P97807|FUMH_MOUSE	sp|P97807-2|FUMH_MOUSE;sp|P97807|FUMH_MOUSE	Isoform Cytoplasmic of Fumarate hydratase, mitochondrial OS=Mus musculus OX=10090 GN=Fh;Fumarate hydratase, mitochondrial OS=Mus musculus OX=10090 GN=Fh PE=1 SV=3	2	2	7.3	50.052	467	0.0011396	13.626	1//0	1//0	1//0	9918900	25	6			-1;-1	396760	75748	178440	142560	6863800	7594900					4.97664e+06	3.46722e+06	1.74497e+06	0.146023	0.467254408060453					-0.521392	0.329861111111111	-1.51197	0.169909208819715	-0.99058	0.411167512690355	2.52266	2.86272	1.22462
sp|P97821|CATC_MOUSE	Ctsc	sp|P97821|CATC_MOUSE	sp|P97821|CATC_MOUSE	Dipeptidyl peptidase 1 OS=Mus musculus OX=10090 GN=Ctsc PE=1 SV=1	1	5	15.4	52.376	462	0	72.063	1//0	1//0	1//0	154170000	21	21			-1	7341300	3646200	1025500	2669500	338860000	28170000	65731000				1.65499e+08	1.67376e+07	2.74472e+07	-3.58846	0.0201511335012594	-2.36604	0.0527817403708987	1.22241	0.852023121387283	-3.30566	0.0428240740740741	-2.59209	0.0674448767833982	0.713569	0.754314720812183	121.431	16.4521	22.9316
sp|P97823|LYPA1_MOUSE	Lypla1	sp|P97823|LYPA1_MOUSE;sp|P97823-2|LYPA1_MOUSE	sp|P97823|LYPA1_MOUSE;sp|P97823-2|LYPA1_MOUSE	Acyl-protein thioesterase 1 OS=Mus musculus OX=10090 GN=Lypla1 PE=1 SV=1;Isoform 2 of Acyl-protein thioesterase 1 OS=Mus musculus OX=10090 GN=Lypla1	2	5	38.7	24.687	230	0	46.559	0//0	1//0	0//0	37241000	11	8			-1;-1	3385500		3385500			49440000		SPL_6027		SPL_6027		2.3133e+07														0	54.3136	0
sp|P99024|TBB5_MOUSE	Tubb5	sp|P99024|TBB5_MOUSE	sp|P99024|TBB5_MOUSE	Tubulin beta-5 chain OS=Mus musculus OX=10090 GN=Tubb5 PE=1 SV=1	1	10	79.1	49.67	444	0	323.31	1//0	1//0	1//0	3750900000	19	103			-1	197410000	9887900	121010000	66513000	939820000	2590900000	1319500000				4.12647e+08	1.158e+09	4.95348e+08	1.463	0.705289672544081	0.489535	0.620542082738944	-0.973462	0.374566473988439	1.48865	0.680555555555556	0.263535	0.509727626459144	-1.22512	0.350253807106599	329.3	1941.37	571.36
sp|P99026|PSB4_MOUSE	Psmb4	sp|P99026|PSB4_MOUSE	sp|P99026|PSB4_MOUSE	Proteasome subunit beta type-4 OS=Mus musculus OX=10090 GN=Psmb4 PE=1 SV=1	1	2	12.1	29.116	264	0	18.883	0//0	1//0	1//0	45314000	11	6			-1	4119500		953030	3166400		11484000	30993000	SPL_6027	SPL_21358			8.14791e+06	1.70531e+07					1.43232	0.883236994219653					1.06553	0.811167512690355	0	15.2895	27.2
sp|P99027|RLA2_MOUSE	Rplp2	sp|P99027|RLA2_MOUSE	sp|P99027|RLA2_MOUSE	60S acidic ribosomal protein P2 OS=Mus musculus OX=10090 GN=Rplp2 PE=1 SV=3	1	14	100	11.651	115	0	323.31	1//0	1//0	1//0	5742100000	5	127			-1	1148400000	635630000	381690000	131100000	13607000000	3200200000	945680000				6.42991e+09	1.13063e+09	2.8278e+08	-2.08812	0.0869017632241814	-3.84685	0.0199714693295292	-1.75874	0.24393063583815	-2.50767	0.104166666666667	-4.50705	0.0116731517509728	-1.99938	0.22741116751269	21168.6	6123.46	1126.18
sp|P99028|QCR6_MOUSE	Uqcrh	sp|P99028|QCR6_MOUSE	sp|P99028|QCR6_MOUSE	Cytochrome b-c1 complex subunit 6, mitochondrial OS=Mus musculus OX=10090 GN=Uqcrh PE=1 SV=2	1	3	30.3	10.435	89	0	206.05	1//0	1//0	1//0	632330000	7	25			-1	90333000	6642200	47899000	35792000	278520000	383430000	166740000				1.22188e+08	2.60591e+08	1.22664e+08	0.461182	0.532745591939547	-0.740181	0.245363766048502	-1.20136	0.335260115606936	1.09268	0.615740740740741	0.00560689	0.429312581063554	-1.08707	0.387817258883249	221.208	768.445	307.461
sp|P99029-2|PRDX5_MOUSE	Prdx5	sp|P99029-2|PRDX5_MOUSE;sp|P99029|PRDX5_MOUSE	sp|P99029-2|PRDX5_MOUSE;sp|P99029|PRDX5_MOUSE	Isoform Cytoplasmic+peroxisomal of Peroxiredoxin-5, mitochondrial OS=Mus musculus OX=10090 GN=Prdx5;Peroxiredoxin-5, mitochondrial OS=Mus musculus OX=10090 GN=Prdx5 PE=1 SV=2	2	8	59.3	17.015	162	0	58.018	1//0	1//0	1//0	110220000	10	23			-1;-1	11022000	1864500	3506700	5650600	58893000	56159000	64401000				3.10636e+07	2.72547e+07	2.76652e+07	-0.0685789	0.419395465994962	0.128987	0.472182596291013	0.197566	0.632369942196532	-0.188721	0.393518518518519	-0.16715	0.378728923476005	0.0215708	0.62741116751269	62.0941	56.258	48.5398
sp|Q00558|HAP40_MOUSE	F8a1	sp|Q00558|HAP40_MOUSE	sp|Q00558|HAP40_MOUSE	40-kDa huntingtin-associated protein OS=Mus musculus OX=10090 GN=F8a1 PE=1 SV=1	1	8	29.5	40.489	380	0	65.812	0//0	1//0	1//0	66229000	11	13			-1	6020800		4729300	1291500		69595000	11963000	SPL_6027	SPL_21358			2.98558e+07	6.95519e+06					-2.5404	0.160693641618497					-2.10185	0.218274111675127	0	75.8722	11.0943
sp|Q00612|G6PD1_MOUSE	G6pdx	sp|Q00612|G6PD1_MOUSE;sp|P97324|G6PD2_MOUSE	sp|Q00612|G6PD1_MOUSE	Glucose-6-phosphate 1-dehydrogenase X OS=Mus musculus OX=10090 GN=G6pdx PE=1 SV=3	2	6	13.8	59.262	515	0	47.454	0//0	0//0	1//0	174320000	32	7			-1;-1	5447400			5447400			149530000		SPL_21358	SPL_21358			6.11032e+07													0	0	46.7943
sp|Q00623|APOA1_MOUSE	Apoa1	sp|Q00623|APOA1_MOUSE	sp|Q00623|APOA1_MOUSE	Apolipoprotein A-I OS=Mus musculus OX=10090 GN=Apoa1 PE=1 SV=2	1	13	54.9	30.615	264	0	168.24	1//0	1//0	1//0	1583300000	14	66			-1	113100000	4425200	53611000	55061000	413100000	746930000	758480000				9.14268e+07	3.43154e+08	2.65946e+08	0.854482	0.623425692695214	0.87662	0.751783166904422	0.0221381	0.588439306358381	1.90817	0.747685185185185	1.54045	0.805447470817121	-0.367721	0.547208121827411	147.374	860.082	472.985
sp|Q00896|A1AT3_MOUSE	Serpina1c	sp|Q00896|A1AT3_MOUSE;sp|P07758|A1AT1_MOUSE;sp|Q00897|A1AT4_MOUSE;sp|P22599|A1AT2_MOUSE;sp|Q00898|A1AT5_MOUSE	sp|Q00896|A1AT3_MOUSE;sp|P07758|A1AT1_MOUSE;sp|Q00897|A1AT4_MOUSE;sp|P22599|A1AT2_MOUSE;sp|Q00898|A1AT5_MOUSE	Alpha-1-antitrypsin 1-3 OS=Mus musculus OX=10090 GN=Serpina1c PE=1 SV=2;Alpha-1-antitrypsin 1-1 OS=Mus musculus OX=10090 GN=Serpina1a PE=1 SV=4;Alpha-1-antitrypsin 1-4 OS=Mus musculus OX=10090 GN=Serpina1d PE=1 SV=1;Alpha-1-antitrypsin 1-2 OS=Mus musculus	5	8	28.6	45.823	412	0	87.101	1//0	1//0	1//0	344430000	15	32			-1;-1;-1;-1;-1	22962000	1163200	5680200	16119000	86748000	140650000	148790000				4.10016e+07	6.62214e+07	1.09927e+08	0.697207	0.593198992443325	0.778375	0.714693295292439	0.081168	0.602312138728324	0.69162	0.532407407407407	1.42279	0.785992217898833	0.731173	0.758375634517766	38.7385	91.1275	138.466
sp|Q00PI9|HNRL2_MOUSE	Hnrnpul2	sp|Q00PI9|HNRL2_MOUSE	sp|Q00PI9|HNRL2_MOUSE	Heterogeneous nuclear ribonucleoprotein U-like protein 2 OS=Mus musculus OX=10090 GN=Hnrnpul2 PE=1 SV=2	1	10	16	84.939	745	0	95.602	1//0	1//0	0//0	358690000	34	33			-1	10550000	1867300	8682300		338770000	338080000			SPL_M	SPL_6027	1.66846e+08	1.77928e+08		-0.00294145	0.433249370277078					0.0927726	0.440972222222222					62.1873	139.29	0
sp|Q01405|SC23A_MOUSE	Sec23a	sp|Q01405|SC23A_MOUSE	sp|Q01405|SC23A_MOUSE	Protein transport protein Sec23A OS=Mus musculus OX=10090 GN=Sec23a PE=1 SV=2	1	15	30.6	86.161	765	0	280.18	1//0	1//0	1//0	1046400000	37	63			-1	28281000	1829300	3084000	23368000	405750000	189730000	593780000				9.77658e+07	4.92994e+07	2.24556e+08	-1.09664	0.211586901763224	0.549337	0.641940085592011	1.64598	0.913294797687861	-0.987758	0.25	1.19968	0.744487678339818	2.18743	0.918781725888325	60.9218	49.4767	200.736
sp|Q01514|GBP1_MOUSE	Gbp1	sp|Q01514|GBP1_MOUSE	sp|Q01514|GBP1_MOUSE	Guanylate-binding protein 1 OS=Mus musculus OX=10090 GN=Gbp1 PE=1 SV=1	1	3	7.5	67.711	589	0	20.669	0//0	1//0	0//0	27455000	28	4			-1	980520		980520			35029000		SPL_6027		SPL_6027		2.13382e+07														0	15.7305	0
sp|Q01730|RSU1_MOUSE	Rsu1	sp|Q01730|RSU1_MOUSE	sp|Q01730|RSU1_MOUSE	Ras suppressor protein 1 OS=Mus musculus OX=10090 GN=Rsu1 PE=1 SV=3	1	18	72.9	31.55	277	0	323.31	1//0	1//0	1//0	4054800000	14	138			-1	289630000	6826200	61313000	221490000	545120000	1172900000	2425100000				1.52673e+08	2.92929e+08	9.35358e+08	1.10543	0.664987405541562	2.1534	0.931526390870185	1.04796	0.821965317919075	0.940107	0.585648148148148	2.61508	0.928664072632944	1.67497	0.871065989847716	227.335	983.646	1902.64
sp|Q01768|NDKB_MOUSE	Nme2	sp|Q01768|NDKB_MOUSE	sp|Q01768|NDKB_MOUSE	Nucleoside diphosphate kinase B OS=Mus musculus OX=10090 GN=Nme2 PE=1 SV=1	1	2	46.1	17.363	152	0	38.932	0//0	1//0	1//0	53642000	11	11			-1	4876500		2647300	2229300		25971000	34160000	SPL_6027	SPL_21358			2.26325e+07	1.2006e+07					0.395406	0.679768786127168					-0.914646	0.426395939086294	0	42.4707	19.1501
sp|Q01853|TERA_MOUSE	Vcp	sp|Q01853|TERA_MOUSE	sp|Q01853|TERA_MOUSE	Transitional endoplasmic reticulum ATPase OS=Mus musculus OX=10090 GN=Vcp PE=1 SV=4	1	14	23.9	89.321	806	0	146.86	1//0	1//0	1//0	226070000	42	39			-1	5382600	193120	2994800	2194700	72332000	139560000	66377000				1.93787e+07	4.77198e+07	4.51294e+07	0.94818	0.638539042821159	-0.123951	0.393723252496434	-1.07213	0.363005780346821	1.30011	0.643518518518518	1.21959	0.754863813229572	-0.0805216	0.604060913705584	6.43154	48.0456	18.8529
sp|Q02013|AQP1_MOUSE	Aqp1	sp|Q02013|AQP1_MOUSE	sp|Q02013|AQP1_MOUSE	Aquaporin-1 OS=Mus musculus OX=10090 GN=Aqp1 PE=1 SV=3	1	2	15.6	28.793	269	0	34.472	0//0	1//0	0//0	18128000	6	1			-1	3021400		3021400			21901000		SPL_6027		SPL_6027		1.40897e+07														0	48.4724	0
sp|Q02357-5|ANK1_MOUSE	Ank1	sp|Q02357-5|ANK1_MOUSE;sp|Q02357-2|ANK1_MOUSE;sp|Q02357|ANK1_MOUSE;sp|Q02357-3|ANK1_MOUSE;sp|Q02357-4|ANK1_MOUSE;sp|Q02357-6|ANK1_MOUSE	sp|Q02357-5|ANK1_MOUSE;sp|Q02357-2|ANK1_MOUSE;sp|Q02357|ANK1_MOUSE;sp|Q02357-3|ANK1_MOUSE;sp|Q02357-4|ANK1_MOUSE;sp|Q02357-6|ANK1_MOUSE	Isoform 5 of Ankyrin-1 OS=Mus musculus OX=10090 GN=Ank1;Isoform Br2 of Ankyrin-1 OS=Mus musculus OX=10090 GN=Ank1;Ankyrin-1 OS=Mus musculus OX=10090 GN=Ank1 PE=1 SV=2;Isoform Er3 of Ankyrin-1 OS=Mus musculus OX=10090 GN=Ank1;Isoform Br4 of Ankyrin-1 OS=Mus	6	2	1.3	192.03	1744	0.0021727	11.872	1//0	0//0	1//0	8068600	89	4			-1;-1;-1;-1;-1;-1	90658			90658			7111700	SPL_M		SPL_21358	0		3.95035e+06													0	0	0.778771
sp|Q03265|ATPA_MOUSE	Atp5f1a	sp|Q03265|ATPA_MOUSE	sp|Q03265|ATPA_MOUSE	ATP synthase subunit alpha, mitochondrial OS=Mus musculus OX=10090 GN=Atp5f1a PE=1 SV=1	1	54	75.8	59.752	553	0	323.31	1//0	1//0	1//0	25015000000	31	470			-1	806940000	66812000	611050000	129080000	8628300000	22533000000	6269900000				2.11263e+09	3.82186e+09	5.28048e+08	1.38489	0.697732997481108	-0.460634	0.30527817403709	-1.84553	0.232369942196532	0.855239	0.569444444444444	-2.0003	0.110246433203632	-2.85554	0.137055837563452	2225.06	9803.09	1108.82
sp|Q03958|PFD6_MOUSE	Pfdn6	sp|Q03958|PFD6_MOUSE	sp|Q03958|PFD6_MOUSE	Prefoldin subunit 6 OS=Mus musculus OX=10090 GN=Pfdn6 PE=1 SV=1	1	4	28.3	14.454	127	0	67.013	1//0	1//0	1//0	90186000	8	10			-1	11273000	1192000	4341800	5739400	48014000	30689000	47554000				2.50605e+07	2.69959e+07	2.24798e+07	-0.645733	0.295969773299748	-0.0138884	0.427960057061341	0.631845	0.735260115606936	0.107329	0.444444444444444	-0.156786	0.382619974059663	-0.264114	0.568527918781726	39.6976	69.6556	49.3026
sp|Q04207-2|TF65_MOUSE	Rela	sp|Q04207-2|TF65_MOUSE;sp|Q04207|TF65_MOUSE	sp|Q04207-2|TF65_MOUSE;sp|Q04207|TF65_MOUSE	Isoform p65 delta of Transcription factor p65 OS=Mus musculus OX=10090 GN=Rela;Transcription factor p65 OS=Mus musculus OX=10090 GN=Rela PE=1 SV=1	2	9	21.5	59.06	539	0	72.156	1//0	1//0	1//0	248480000	18	34			-1;-1	13804000	859280	6470100	6474900	105700000	110560000	114610000				3.69483e+07	5.85508e+07	5.70618e+07	0.0648541	0.453400503778338	0.116758	0.467902995720399	0.0519034	0.597687861271676	0.664181	0.527777777777778	0.627018	0.616083009079118	-0.0371633	0.609137055837564	28.6169	103.8	55.6207
sp|Q04863|RELB_MOUSE	Relb	sp|Q04863|RELB_MOUSE	sp|Q04863|RELB_MOUSE	Transcription factor RelB OS=Mus musculus OX=10090 GN=Relb PE=1 SV=2	1	2	6.1	60.305	558	0.0021153	10.822	0//0	1//0	0//0	9150300	28	1			-1	326800		326800			10740000		SPL_6027		SPL_6027		7.1118e+06														0	5.24286	0
sp|Q05117|PPA5_MOUSE	Acp5	sp|Q05117|PPA5_MOUSE	sp|Q05117|PPA5_MOUSE	Tartrate-resistant acid phosphatase type 5 OS=Mus musculus OX=10090 GN=Acp5 PE=1 SV=2	1	5	24.5	36.807	327	0	46.696	1//0	1//0	0//0	90757000	12	14			-1	7563100	1731700	5831400		114440000	73003000			SPL_M	SPL_6027	5.46114e+07	4.69571e+07		-0.648564	0.294710327455919					-0.217859	0.388888888888889					57.6714	93.5533	0
sp|Q05144|RAC2_MOUSE	Rac2	sp|Q05144|RAC2_MOUSE	sp|Q05144|RAC2_MOUSE	Ras-related C3 botulinum toxin substrate 2 OS=Mus musculus OX=10090 GN=Rac2 PE=1 SV=1	1	14	52.6	21.441	192	0	224.39	1//0	1//0	1//0	8704200000	7	107			-1	1243500000	28152000	744980000	470320000	1412200000	6707100000	2380500000				3.44574e+08	1.9431e+09	1.14118e+09	2.24774	0.808564231738035	0.75332	0.70756062767475	-1.49442	0.284393063583815	2.49547	0.834490740740741	1.72764	0.832684824902724	-0.767828	0.449746192893401	937.556	11951.7	4040.15
sp|Q05915|GCH1_MOUSE	Gch1	sp|Q05915|GCH1_MOUSE	sp|Q05915|GCH1_MOUSE	GTP cyclohydrolase 1 OS=Mus musculus OX=10090 GN=Gch1 PE=1 SV=1	1	9	32.8	27.014	241	0	56.788	1//0	1//0	1//0	99826000	15	17			-1	6655100	3944900		2710100	265430000		41502000				9.82137e+07	0	1.99029e+07			-2.67708	0.0427960057061341					-2.30294	0.0804150453955901			131.378	0	23.2803
sp|Q06185|ATP5I_MOUSE	Atp5me	sp|Q06185|ATP5I_MOUSE	sp|Q06185|ATP5I_MOUSE	ATP synthase subunit e, mitochondrial OS=Mus musculus OX=10090 GN=Atp5me PE=1 SV=2	1	4	54.9	8.2355	71	0	73.227	1//0	1//0	1//0	563500000	4	27			-1	140870000	14464000	91490000	34920000	332050000	335430000	188010000				1.52045e+08	2.72466e+08	6.83857e+07	0.0146112	0.44080604534005	-0.820591	0.226818830242511	-0.835202	0.398843930635838	0.841575	0.568287037037037	-1.15273	0.214007782101167	-1.99431	0.228426395939086	481.7	1467.78	299.97
sp|Q06890|CLUS_MOUSE	Clu	sp|Q06890|CLUS_MOUSE	sp|Q06890|CLUS_MOUSE	Clusterin OS=Mus musculus OX=10090 GN=Clu PE=1 SV=1	1	4	11.8	51.655	448	0	30.125	0//0	1//0	0//0	38193000	19	6			-1	2010100		2010100			48571000		SPL_6027		SPL_6027		2.54202e+07														0	32.2481	0
sp|Q07813|BAX_MOUSE	Bax	sp|Q07813|BAX_MOUSE	sp|Q07813|BAX_MOUSE	Apoptosis regulator BAX OS=Mus musculus OX=10090 GN=Bax PE=1 SV=1	1	4	24.5	21.394	192	0	134.69	0//0	1//0	0//0	185200000	8	11			-1	23150000		23150000			235770000		SPL_6027		SPL_6027		1.31214e+08														0	371.396	0
sp|Q08093|CNN2_MOUSE	Cnn2	sp|Q08093|CNN2_MOUSE;sp|Q9DAW9|CNN3_MOUSE	sp|Q08093|CNN2_MOUSE	Calponin-2 OS=Mus musculus OX=10090 GN=Cnn2 PE=1 SV=1	2	8	38	33.155	305	0	189.33	1//0	0//0	1//0	127570000	13	20			-1;-1	9812800	2032400		7780400	94164000		114340000	SPL_M		SPL_21358	4.88584e+07		3.6904e+07			0.280083	0.53922967189729					-0.404831	0.337224383916991			67.6857	0	66.8352
sp|Q08642|PADI2_MOUSE	Padi2	sp|Q08642|PADI2_MOUSE	sp|Q08642|PADI2_MOUSE	Protein-arginine deiminase type-2 OS=Mus musculus OX=10090 GN=Padi2 PE=1 SV=2	1	6	14.7	76.249	673	0	39.81	1//0	1//0	0//0	26694000	30	11			-1	889790	247930	641870		29497000	28895000			SPL_M	SPL_6027	1.61226e+07	1.4966e+07		-0.0297484	0.426952141057934					-0.107399	0.407407407407407					8.2569	10.2975	0
sp|Q08857|CD36_MOUSE	Cd36	sp|Q08857|CD36_MOUSE	sp|Q08857|CD36_MOUSE	Platelet glycoprotein 4 OS=Mus musculus OX=10090 GN=Cd36 PE=1 SV=2	1	15	36.4	52.697	472	0	210.53	0//0	1//0	0//0	1074900000	16	40			-1	67179000		67179000			1375800000		SPL_6027		SPL_6027		4.15312e+08														0	1077.75	0
sp|Q09143|SL7A1_MOUSE	Slc7a1	sp|Q09143|SL7A1_MOUSE	sp|Q09143|SL7A1_MOUSE	High affinity cationic amino acid transporter 1 OS=Mus musculus OX=10090 GN=Slc7a1 PE=1 SV=1	1	2	6.4	67.091	622	0	21.103	0//0	1//0	0//0	18996000	19	2			-1	999770		999770			22340000		SPL_6027		SPL_6027		1.47636e+07														0	16.0393	0
sp|Q09200|B4GN1_MOUSE	B4galnt1	sp|Q09200|B4GN1_MOUSE	sp|Q09200|B4GN1_MOUSE	Beta-1,4 N-acetylgalactosaminyltransferase 1 OS=Mus musculus OX=10090 GN=B4galnt1 PE=1 SV=1	1	11	29.8	59.211	533	0	72.552	0//0	1//0	1//0	71725000	29	17			-1	2473300		2473300			89988000		SPL_6027	SPL_21358			3.67622e+07	0													0	39.6792	0
sp|Q11136|PEPD_MOUSE	Pepd	sp|Q11136|PEPD_MOUSE	sp|Q11136|PEPD_MOUSE	Xaa-Pro dipeptidase OS=Mus musculus OX=10090 GN=Pepd PE=1 SV=3	1	4	9.3	55.028	493	0	45.321	0//0	0//0	1//0	49758000	24	6			-1	2073200			2073200			42477000		SPL_21358	SPL_21358			2.22553e+07													0	0	17.8092
sp|Q3TAP4|AP5B1_MOUSE	Ap5b1	sp|Q3TAP4|AP5B1_MOUSE	sp|Q3TAP4|AP5B1_MOUSE	AP-5 complex subunit beta-1 OS=Mus musculus OX=10090 GN=Ap5b1 PE=1 SV=1	1	2	3.2	94.678	876	0.0021751	11.885	0//0	1//0	0//0	7223100	34	3			-1	212440		212440			9341600		SPL_6027		SPL_6027		5.61387e+06														0	3.40818	0
sp|Q3TAS6-2|EMC10_MOUSE	Emc10	sp|Q3TAS6-2|EMC10_MOUSE;sp|Q3TAS6|EMC10_MOUSE	sp|Q3TAS6-2|EMC10_MOUSE;sp|Q3TAS6|EMC10_MOUSE	Isoform 2 of ER membrane protein complex subunit 10 OS=Mus musculus OX=10090 GN=Emc10;ER membrane protein complex subunit 10 OS=Mus musculus OX=10090 GN=Emc10 PE=2 SV=2	2	2	15	26.687	254	0.0006215	18.284	0//0	1//0	0//0	24817000	9	2			-1;-1	2757400		2757400			30587000		SPL_6027		SPL_6027		1.92881e+07														0	44.237	0
sp|Q3TBD2|HMHA1_MOUSE	Arhgap45	sp|Q3TBD2|HMHA1_MOUSE;sp|Q3TBD2-2|HMHA1_MOUSE;sp|Q3TBD2-3|HMHA1_MOUSE;sp|Q3TBD2-4|HMHA1_MOUSE	sp|Q3TBD2|HMHA1_MOUSE;sp|Q3TBD2-2|HMHA1_MOUSE	Rho GTPase-activating protein 45 OS=Mus musculus OX=10090 GN=Arhgap45 PE=1 SV=2;Isoform 2 of Rho GTPase-activating protein 45 OS=Mus musculus OX=10090 GN=Arhgap45	4	13	15.9	122.9	1116	0	323.31	1//0	1//0	1//0	298700000	40	33			-1;-1;-1;-1	7467400	96587	6873100	497730	15591000	336150000	27589000				1.01533e+07	1.34258e+08	9.7476e+06	4.43032	0.943324937027708	0.82338	0.731811697574893	-3.60694	0.0947976878612717	3.72498	0.921296296296296	-0.0588332	0.411154345006485	-3.78382	0.067005076142132	3.21667	110.265	4.2756
sp|Q3TBT3-3|STING_MOUSE	Sting1	sp|Q3TBT3-3|STING_MOUSE;sp|Q3TBT3|STING_MOUSE;sp|Q3TBT3-2|STING_MOUSE	sp|Q3TBT3-3|STING_MOUSE;sp|Q3TBT3|STING_MOUSE;sp|Q3TBT3-2|STING_MOUSE	Isoform 3 of Stimulator of interferon genes protein OS=Mus musculus OX=10090 GN=Sting1;Stimulator of interferon genes protein OS=Mus musculus OX=10090 GN=Sting1 PE=1 SV=2;Isoform 2 of Stimulator of interferon genes protein OS=Mus musculus OX=10090 GN=Sting	3	6	23.4	38.036	337	0	101.65	0//0	1//0	0//0	130870000	15	17			-1;-1;-1	8724700		8724700			168780000		SPL_6027		SPL_6027		7.54799e+07														0	139.971	0
sp|Q3TC33|CC127_MOUSE	Ccdc127	sp|Q3TC33|CC127_MOUSE;sp|Q3TC33-2|CC127_MOUSE	sp|Q3TC33|CC127_MOUSE;sp|Q3TC33-2|CC127_MOUSE	Coiled-coil domain-containing protein 127 OS=Mus musculus OX=10090 GN=Ccdc127 PE=1 SV=2;Isoform 2 of Coiled-coil domain-containing protein 127 OS=Mus musculus OX=10090 GN=Ccdc127	2	7	34.6	30.509	260	0	114.5	0//0	1//0	0//0	153670000	14	13			-1;-1	10977000		10977000			199600000		SPL_6027		SPL_6027		8.3611e+07														0	176.104	0
sp|Q3TCJ1|ABRX2_MOUSE	Abraxas2	sp|Q3TCJ1|ABRX2_MOUSE	sp|Q3TCJ1|ABRX2_MOUSE	BRISC complex subunit Abraxas 2 OS=Mus musculus OX=10090 GN=Abraxas2 PE=1 SV=1	1	2	5.8	46.942	415	0.0011621	14.388	0//0	1//0	1//0	69107000	14	6			-1	4936200		494450	4441800		13401000	48086000	SPL_6027	SPL_21358			5.38021e+06	3.04457e+07					1.84328	0.928323699421965					2.5005	0.931979695431472	0	7.93247	38.156
sp|Q3TDN2-2|FAF2_MOUSE	Faf2	sp|Q3TDN2-2|FAF2_MOUSE;sp|Q3TDN2|FAF2_MOUSE	sp|Q3TDN2-2|FAF2_MOUSE;sp|Q3TDN2|FAF2_MOUSE	Isoform 2 of FAS-associated factor 2 OS=Mus musculus OX=10090 GN=Faf2;FAS-associated factor 2 OS=Mus musculus OX=10090 GN=Faf2 PE=1 SV=2	2	4	14.3	50.23	426	0	26.161	0//0	1//0	0//0	17839000	19	3			-1;-1	938920		938920			23177000		SPL_6027		SPL_6027		1.10647e+07														0	15.0631	0
sp|Q3TDQ1|STT3B_MOUSE	Stt3b	sp|Q3TDQ1|STT3B_MOUSE	sp|Q3TDQ1|STT3B_MOUSE	Dolichyl-diphosphooligosaccharide--protein glycosyltransferase subunit STT3B OS=Mus musculus OX=10090 GN=Stt3b PE=1 SV=2	1	6	12.9	93.245	823	0	52.097	0//0	1//0	0//0	76595000	32	14			-1	2393600		2393600			91614000		SPL_6027		SPL_6027		4.13968e+07														0	38.4006	0
sp|Q3TEA8-3|HP1B3_MOUSE	Hp1bp3	sp|Q3TEA8-3|HP1B3_MOUSE;sp|Q3TEA8-2|HP1B3_MOUSE;sp|Q3TEA8|HP1B3_MOUSE	sp|Q3TEA8-3|HP1B3_MOUSE;sp|Q3TEA8-2|HP1B3_MOUSE;sp|Q3TEA8|HP1B3_MOUSE	Isoform 3 of Heterochromatin protein 1-binding protein 3 OS=Mus musculus OX=10090 GN=Hp1bp3;Isoform 2 of Heterochromatin protein 1-binding protein 3 OS=Mus musculus OX=10090 GN=Hp1bp3;Heterochromatin protein 1-binding protein 3 OS=Mus musculus OX=10090 GN=	3	7	13.6	56.84	516	0	48.61	1//0	1//0	1//0	93373000	23	17			-1;-1;-1	4059700	726850	2706200	626610	94527000	60849000					4.39333e+07	3.66889e+07	7.05605e+06	-0.635493	0.298488664987406					-0.259974	0.377314814814815	-2.63838	0.0622568093385214	-2.37841	0.190862944162437	24.2065	43.4156	5.38271
sp|Q3THE2|ML12B_MOUSE	Myl12b	sp|Q3THE2|ML12B_MOUSE	sp|Q3THE2|ML12B_MOUSE	Myosin regulatory light chain 12B OS=Mus musculus OX=10090 GN=Myl12b PE=1 SV=2	1	14	66.3	19.779	172	0	323.31	1//0	1//0	1//0	1634800000	9	79			-1	181640000	24751000	129680000	27208000	923510000	1534500000	236420000				4.17487e+08	5.32509e+08	1.09206e+08	0.732569	0.596977329974811	-1.96578	0.079885877318117	-2.69834	0.145664739884393	0.351075	0.476851851851852	-1.93468	0.121919584954604	-2.28576	0.198984771573604	824.291	2080.46	233.722
sp|Q3THS6|METK2_MOUSE	Mat2a	sp|Q3THS6|METK2_MOUSE	sp|Q3THS6|METK2_MOUSE	S-adenosylmethionine synthase isoform type-2 OS=Mus musculus OX=10090 GN=Mat2a PE=1 SV=2	1	20	56.5	43.688	395	0	323.31	1//0	1//0	1//0	5600700000	19	150			-1	294770000	10318000	68212000	216240000	1238500000	1613300000	3168900000				2.67147e+08	3.97009e+08	9.29607e+08	0.381421	0.513853904282116	1.35539	0.848787446504993	0.973967	0.806936416184971	0.571535	0.505787037037037	1.79898	0.840466926070039	1.22745	0.831472081218274	343.624	1094.33	1857.55
sp|Q3THW5|H2AV_MOUSE	H2az2	sp|Q3THW5|H2AV_MOUSE;sp|P0C0S6|H2AZ_MOUSE	sp|Q3THW5|H2AV_MOUSE;sp|P0C0S6|H2AZ_MOUSE	Histone H2A.V OS=Mus musculus OX=10090 GN=H2az2 PE=1 SV=3;Histone H2A.Z OS=Mus musculus OX=10090 GN=H2az1 PE=1 SV=2	2	2	43	13.509	128	0	41.502	0//1	1//0	0//1	88035000	5	5			-1;-1	17607000		17607000			124660000		SPL_6027		SPL_6027		6.84213e+07														0	282.469	0
sp|Q3TKT4-2|SMCA4_MOUSE	Smarca4	sp|Q3TKT4-2|SMCA4_MOUSE;sp|Q3TKT4|SMCA4_MOUSE;sp|Q6DIC0|SMCA2_MOUSE	sp|Q3TKT4-2|SMCA4_MOUSE;sp|Q3TKT4|SMCA4_MOUSE	Isoform 2 of Transcription activator BRG1 OS=Mus musculus OX=10090 GN=Smarca4;Transcription activator BRG1 OS=Mus musculus OX=10090 GN=Smarca4 PE=1 SV=1	3	7	5.8	181.51	1614	0	104.47	1//0	1//0	1//0	25863000	60	11			-1;-1;-1	431050	160760	14750	255550			13355000				2.14658e+07	687825	7.50687e+06							-4.96385	0.00925925925925926	-1.51576	0.167315175097276	3.4481	0.974619289340102	5.35385	0.236635	2.19523
sp|Q3TPX4|EXOC5_MOUSE	Exoc5	sp|Q3TPX4|EXOC5_MOUSE	sp|Q3TPX4|EXOC5_MOUSE	Exocyst complex component 5 OS=Mus musculus OX=10090 GN=Exoc5 PE=1 SV=2	1	5	12.4	81.737	708	0	46.017	0//0	1//0	0//0	65959000	41	9			-1	1608800		1608800			84972000		SPL_6027		SPL_6027		4.07551e+07														0	25.81	0
sp|Q3TRM8|HXK3_MOUSE	Hk3	sp|Q3TRM8|HXK3_MOUSE;sp|P52792-2|HXK4_MOUSE;sp|P52792|HXK4_MOUSE	sp|Q3TRM8|HXK3_MOUSE	Hexokinase-3 OS=Mus musculus OX=10090 GN=Hk3 PE=1 SV=2	3	4	6.7	100.1	922	0	24.327	1//0	0//0	0//0	22428000	48	7			-1;-1;-1	467250	467250			106130000			SPL_M	SPL_M		5.34251e+07															15.561	0	0
sp|Q3TUH1|TAM41_MOUSE	Tamm41	sp|Q3TUH1|TAM41_MOUSE;sp|Q3TUH1-2|TAM41_MOUSE	sp|Q3TUH1|TAM41_MOUSE;sp|Q3TUH1-2|TAM41_MOUSE	Phosphatidate cytidylyltransferase, mitochondrial OS=Mus musculus OX=10090 GN=Tamm41 PE=1 SV=2;Isoform 2 of Phosphatidate cytidylyltransferase, mitochondrial OS=Mus musculus OX=10090 GN=Tamm41	2	2	10.4	37.827	337	0.0011136	12.836	0//0	1//0	0//0	7443800	17	2			-1;-1	437870		437870			9573700		SPL_6027		SPL_6027		5.78549e+06														0	7.02476	0
sp|Q3TWL2|PP4P1_MOUSE	Pip4p1	sp|Q3TWL2|PP4P1_MOUSE	sp|Q3TWL2|PP4P1_MOUSE	Type 1 phosphatidylinositol 4,5-bisphosphate 4-phosphatase OS=Mus musculus OX=10090 GN=Pip4p1 PE=1 SV=1	1	7	26.4	30.047	284	0	63.795	0//0	1//0	0//0	105030000	13	13			-1	8079200		8079200			133850000		SPL_6027		SPL_6027		4.72401e+07														0	129.615	0
sp|Q3TXS7|PSMD1_MOUSE	Psmd1	sp|Q3TXS7|PSMD1_MOUSE	sp|Q3TXS7|PSMD1_MOUSE	26S proteasome non-ATPase regulatory subunit 1 OS=Mus musculus OX=10090 GN=Psmd1 PE=1 SV=1	1	27	43.1	105.73	953	0	323.31	1//0	1//0	1//0	1112800000	45	89			-1	24729000	342010	20008000	4379200	77034000	1126600000	192490000				4.04455e+07	2.15636e+08	9.39299e+07	3.87034	0.918136020151133	1.32122	0.843081312410842	-2.54912	0.159537572254335	2.41455	0.821759259259259	1.2156	0.750972762645914	-1.19894	0.359390862944162	11.3901	320.989	37.6182
sp|Q3TXT3|SOSSC_MOUSE	Inip	sp|Q3TXT3|SOSSC_MOUSE;sp|Q3TXT3-2|SOSSC_MOUSE	sp|Q3TXT3|SOSSC_MOUSE;sp|Q3TXT3-2|SOSSC_MOUSE	SOSS complex subunit C OS=Mus musculus OX=10090 GN=Inip PE=3 SV=1;Isoform 2 of SOSS complex subunit C OS=Mus musculus OX=10090 GN=Inip	2	2	24	11.411	104	0	25.605	0//0	1//0	1//0	189320000	4	14			-1;-1	47331000		23722000	23609000		135350000	65253000	SPL_6027	SPL_21358			7.3747e+07	4.62353e+07					-1.05258	0.366473988439306					-0.673591	0.476142131979695	0	380.572	202.806
sp|Q3TYS2|CYBC1_MOUSE	Cybc1	sp|Q3TYS2|CYBC1_MOUSE	sp|Q3TYS2|CYBC1_MOUSE	Cytochrome b-245 chaperone 1 OS=Mus musculus OX=10090 GN=Cybc1 PE=1 SV=2	1	8	23.5	20.921	187	0	71.773	0//0	1//0	0//0	187250000	11	18			-1	17023000		17023000			231550000		SPL_6027		SPL_6027		1.08936e+08														0	273.1	0
sp|Q3TZX8-3|NOL9_MOUSE	Nol9	sp|Q3TZX8-3|NOL9_MOUSE;sp|Q3TZX8-2|NOL9_MOUSE;sp|Q3TZX8|NOL9_MOUSE	sp|Q3TZX8-3|NOL9_MOUSE;sp|Q3TZX8-2|NOL9_MOUSE;sp|Q3TZX8|NOL9_MOUSE	Isoform 3 of Polynucleotide 5-hydroxyl-kinase NOL9 OS=Mus musculus OX=10090 GN=Nol9;Isoform 2 of Polynucleotide 5-hydroxyl-kinase NOL9 OS=Mus musculus OX=10090 GN=Nol9;Polynucleotide 5-hydroxyl-kinase NOL9 OS=Mus musculus OX=10090 GN=Nol9 PE=1 SV=1	3	2	3.2	70.969	627	0.0011561	14.29	0//0	1//0	1//0	39601000	21	3			-1;-1;-1	1885800		1312500	573300		35544000		SPL_6027	SPL_21358			2.14212e+07	5.89434e+06											-1.86164	0.249746192893401	0	21.0565	4.92477
sp|Q3TZZ7|ESYT2_MOUSE	Esyt2	sp|Q3TZZ7|ESYT2_MOUSE;sp|Q3TZZ7-2|ESYT2_MOUSE	sp|Q3TZZ7|ESYT2_MOUSE;sp|Q3TZZ7-2|ESYT2_MOUSE	Extended synaptotagmin-2 OS=Mus musculus OX=10090 GN=Esyt2 PE=1 SV=1;Isoform 2 of Extended synaptotagmin-2 OS=Mus musculus OX=10090 GN=Esyt2	2	4	7	94.138	845	0	29.435	0//0	1//0	0//0	35238000	39	3			-1;-1	903550		903550			46465000		SPL_6027		SPL_6027		2.57282e+07														0	14.4957	0
sp|Q3U0B3|DHR11_MOUSE	Dhrs11	sp|Q3U0B3|DHR11_MOUSE	sp|Q3U0B3|DHR11_MOUSE	Dehydrogenase/reductase SDR family member 11 OS=Mus musculus OX=10090 GN=Dhrs11 PE=1 SV=1	1	2	9.6	28.274	260	0	25.262	0//0	0//0	1//0	53845000	14	4			-1	3846000			3846000			45895000		SPL_21358	SPL_21358			2.63619e+07													0	0	33.0379
sp|Q3U0V1|FUBP2_MOUSE	Khsrp	sp|Q3U0V1|FUBP2_MOUSE	sp|Q3U0V1|FUBP2_MOUSE	Far upstream element-binding protein 2 OS=Mus musculus OX=10090 GN=Khsrp PE=1 SV=2	1	9	18.2	76.775	748	0	96.005	1//0	1//0	1//0	189200000	33	26			-1	5733500	431490	2060200	3241800	91612000	59405000	93595000				3.74204e+07	3.06708e+07	5.2376e+07	-0.624952	0.302267002518892	0.0308949	0.445078459343795	0.655847	0.741040462427746	-0.286958	0.371527777777778	0.485082	0.583657587548638	0.77204	0.76751269035533	14.3701	33.0518	27.8477
sp|Q3U1J0-2|S38A5_MOUSE	Slc38a5	sp|Q3U1J0-2|S38A5_MOUSE;sp|Q3U1J0|S38A5_MOUSE	sp|Q3U1J0-2|S38A5_MOUSE;sp|Q3U1J0|S38A5_MOUSE	Isoform 2 of Sodium-coupled neutral amino acid transporter 5 OS=Mus musculus OX=10090 GN=Slc38a5;Sodium-coupled neutral amino acid transporter 5 OS=Mus musculus OX=10090 GN=Slc38a5 PE=1 SV=1	2	2	3.4	51.883	471	0.0021906	12.194	0//0	1//0	0//0	24120000	16	3			-1;-1	1507500		1507500			30684000		SPL_6027		SPL_6027		1.87466e+07														0	24.1848	0
sp|Q3U1J4|DDB1_MOUSE	Ddb1	sp|Q3U1J4|DDB1_MOUSE	sp|Q3U1J4|DDB1_MOUSE	DNA damage-binding protein 1 OS=Mus musculus OX=10090 GN=Ddb1 PE=1 SV=2	1	30	34.5	126.85	1140	0	323.31	1//0	1//0	1//0	1282800000	50	112			-1	25657000	1203500	10943000	13510000	396120000	608320000	566180000				8.93412e+07	1.82686e+08	1.64377e+08	0.618893	0.571788413098237	0.515323	0.626248216833096	-0.10357	0.565317919075145	1.03197	0.608796296296296	0.879613	0.673151750972763	-0.152356	0.590862944162437	40.0806	175.559	116.054
sp|Q3U1Z5-2|GPSM3_MOUSE	Gpsm3	sp|Q3U1Z5-2|GPSM3_MOUSE;sp|Q3U1Z5|GPSM3_MOUSE	sp|Q3U1Z5-2|GPSM3_MOUSE;sp|Q3U1Z5|GPSM3_MOUSE	Isoform 2 of G-protein-signaling modulator 3 OS=Mus musculus OX=10090 GN=Gpsm3;G-protein-signaling modulator 3 OS=Mus musculus OX=10090 GN=Gpsm3 PE=1 SV=2	2	2	29.8	13.492	121	0	18.552	0//0	1//0	1//0	31938000	4	6			-1;-1	7984400		5839400	2145000		25617000	11653000	SPL_6027	SPL_21358			1.81538e+07	4.20083e+06					-1.1364	0.352601156069364					-2.11153	0.216243654822335	0	93.6816	18.426
sp|Q3U2I3|F16A2_MOUSE	Fam160a2	sp|Q3U2I3|F16A2_MOUSE;sp|Q3U2I3-2|F16A2_MOUSE;sp|Q3U2I3-3|F16A2_MOUSE	sp|Q3U2I3|F16A2_MOUSE;sp|Q3U2I3-2|F16A2_MOUSE;sp|Q3U2I3-3|F16A2_MOUSE	FTS and Hook-interacting protein OS=Mus musculus OX=10090 GN=Fam160a2 PE=1 SV=2;Isoform 2 of FTS and Hook-interacting protein OS=Mus musculus OX=10090 GN=Fam160a2;Isoform 3 of FTS and Hook-interacting protein OS=Mus musculus OX=10090 GN=Fam160a2	3	2	3.2	106.54	975	0.0011765	15.087	0//0	1//0	0//0	14507000	42	1			-1;-1;-1	345410		345410			18532000		SPL_6027		SPL_6027		1.12751e+07														0	5.54142	0
sp|Q3U2S8|HVCN1_MOUSE	Hvcn1	sp|Q3U2S8|HVCN1_MOUSE	sp|Q3U2S8|HVCN1_MOUSE	Voltage-gated hydrogen channel 1 OS=Mus musculus OX=10090 GN=Hvcn1 PE=1 SV=2	1	6	20.4	31.242	269	0	158.92	0//0	1//0	0//0	130710000	10	14			-1	13071000		13071000			165720000		SPL_6027		SPL_6027		9.12383e+07														0	209.698	0
sp|Q3U319|BRE1B_MOUSE	Rnf40	sp|Q3U319|BRE1B_MOUSE	sp|Q3U319|BRE1B_MOUSE	E3 ubiquitin-protein ligase BRE1B OS=Mus musculus OX=10090 GN=Rnf40 PE=1 SV=2	1	3	3.2	113.97	1001	0	19.882	0//0	1//0	0//0	11130000	53	3			-1	210000		210000			13019000		SPL_6027		SPL_6027		8.65037e+06														0	3.36903	0
sp|Q3U487|HECD3_MOUSE	Hectd3	sp|Q3U487|HECD3_MOUSE;sp|Q3U487-2|HECD3_MOUSE	sp|Q3U487|HECD3_MOUSE	E3 ubiquitin-protein ligase HECTD3 OS=Mus musculus OX=10090 GN=Hectd3 PE=1 SV=2	2	17	30.8	97.346	861	0	171.48	1//0	1//0	1//0	388500000	45	43			-1;-1	8633300	107040	6949200	1577100	30720000	369810000	77598000				1.26578e+07	1.09485e+08	3.47471e+07	3.58953	0.906801007556675	1.33684	0.845934379457917	-2.25269	0.196531791907514	3.11264	0.896990740740741	1.45687	0.791180285343709	-1.65577	0.286294416243655	3.56479	111.486	13.5476
sp|Q3U4G0|CDIN1_MOUSE	Cdin1	sp|Q3U4G0|CDIN1_MOUSE;sp|Q3U4G0-2|CDIN1_MOUSE	sp|Q3U4G0|CDIN1_MOUSE;sp|Q3U4G0-2|CDIN1_MOUSE	CDAN1-interacting nuclease 1 OS=Mus musculus OX=10090 GN=Cdin1 PE=2 SV=2;Isoform 2 of CDAN1-interacting nuclease 1 OS=Mus musculus OX=10090 GN=Cdin1	2	2	8.9	32.112	281	0.0021288	11.071	0//0	1//0	0//0	12753000	13	3			-1;-1	981030		981030			16625000		SPL_6027		SPL_6027		9.9121e+06														0	15.7387	0
sp|Q3U7R1|ESYT1_MOUSE	Esyt1	sp|Q3U7R1|ESYT1_MOUSE;sp|Q3U7R1-2|ESYT1_MOUSE	sp|Q3U7R1|ESYT1_MOUSE;sp|Q3U7R1-2|ESYT1_MOUSE	Extended synaptotagmin-1 OS=Mus musculus OX=10090 GN=Esyt1 PE=1 SV=2;Isoform 2 of Extended synaptotagmin-1 OS=Mus musculus OX=10090 GN=Esyt1	2	3	3.8	121.55	1092	0.0006068	17.112	0//0	1//0	0//0	14987000	47	3			-1;-1	318870		318870			19745000		SPL_6027		SPL_6027		1.16481e+07														0	5.11564	0
sp|Q3U829|AP5Z1_MOUSE	Ap5z1	sp|Q3U829|AP5Z1_MOUSE	sp|Q3U829|AP5Z1_MOUSE	AP-5 complex subunit zeta-1 OS=Mus musculus OX=10090 GN=Ap5z1 PE=2 SV=1	1	7	10.8	89.406	807	0	80.338	0//0	1//0	0//0	79107000	39	13			-1	2028400		2028400			100060000		SPL_6027		SPL_6027		5.04757e+07														0	32.5417	0
sp|Q3U9G9|LBR_MOUSE	Lbr	sp|Q3U9G9|LBR_MOUSE	sp|Q3U9G9|LBR_MOUSE	Delta(14)-sterol reductase LBR OS=Mus musculus OX=10090 GN=Lbr PE=1 SV=2	1	12	20.1	71.439	626	0	208.02	0//0	1//0	1//0	873530000	23	50			-1	37979000		29929000	8050900		883300000	164710000	SPL_6027	SPL_21358			2.60698e+08	8.72361e+07					-2.42298	0.172254335260116					-1.57938	0.298477157360406	0	480.151	69.1589
sp|Q3U9N9|MOT10_MOUSE	Slc16a10	sp|Q3U9N9|MOT10_MOUSE;sp|Q3U9N9-2|MOT10_MOUSE	sp|Q3U9N9|MOT10_MOUSE;sp|Q3U9N9-2|MOT10_MOUSE	Monocarboxylate transporter 10 OS=Mus musculus OX=10090 GN=Slc16a10 PE=1 SV=1;Isoform 2 of Monocarboxylate transporter 10 OS=Mus musculus OX=10090 GN=Slc16a10	2	2	4.9	55.32	512	0.002161	11.708	0//0	1//0	0//0	13349000	11	3			-1;-1	1213500		1213500			17064000		SPL_6027		SPL_6027		1.0375e+07														0	19.4682	0
sp|Q3UBZ5|MI4GD_MOUSE	Mif4gd	sp|Q3UBZ5|MI4GD_MOUSE;sp|Q3UBZ5-2|MI4GD_MOUSE	sp|Q3UBZ5|MI4GD_MOUSE;sp|Q3UBZ5-2|MI4GD_MOUSE	MIF4G domain-containing protein OS=Mus musculus OX=10090 GN=Mif4gd PE=1 SV=1;Isoform 2 of MIF4G domain-containing protein OS=Mus musculus OX=10090 GN=Mif4gd	2	2	9.5	25.493	222	0.0011217	12.961	0//0	1//0	0//0	2397500	14	1			-1;-1	171250		171250			3703100		SPL_6027		SPL_6027		1.86341e+06														0	2.74737	0
sp|Q3UEB3-3|PUF60_MOUSE	Puf60	sp|Q3UEB3-3|PUF60_MOUSE;sp|Q3UEB3-2|PUF60_MOUSE;sp|Q3UEB3|PUF60_MOUSE	sp|Q3UEB3-3|PUF60_MOUSE;sp|Q3UEB3-2|PUF60_MOUSE;sp|Q3UEB3|PUF60_MOUSE	Isoform 3 of Poly(U)-binding-splicing factor PUF60 OS=Mus musculus OX=10090 GN=Puf60;Isoform 2 of Poly(U)-binding-splicing factor PUF60 OS=Mus musculus OX=10090 GN=Puf60;Poly(U)-binding-splicing factor PUF60 OS=Mus musculus OX=10090 GN=Puf60 PE=1 SV=2	3	5	18.8	54.028	499	0	50.633	1//0	1//0	0//0	49962000	23	17			-1;-1;-1	2172300	452280	1720000		54820000	50427000			SPL_M	SPL_6027	2.73373e+07	2.68343e+07		-0.120506	0.413098236775819					-0.0267886	0.418981481481481					15.0624	27.594	0
sp|Q3UGS4|MCRI1_MOUSE	Mcrip1	sp|Q3UGS4|MCRI1_MOUSE	sp|Q3UGS4|MCRI1_MOUSE	Mapk-regulated corepressor-interacting protein 1 OS=Mus musculus OX=10090 GN=Mcrip1 PE=1 SV=1	1	4	50.5	11.101	97	0	29.629	1//0	1//0	1//0	104910000	7	16			-1	14987000	5316900	1290000	8380000	170720000	28473000	35438000				9.78094e+07	7.01838e+06	2.87196e+07	-2.58397	0.0566750629722922	-2.26826	0.0599144079885877	0.315703	0.655491329479769	-3.80076	0.0277777777777778	-1.76794	0.146562905317769	2.03283	0.899492385786802	177.071	20.6955	71.9859
sp|Q3UI43|BABA1_MOUSE	Babam1	sp|Q3UI43|BABA1_MOUSE	sp|Q3UI43|BABA1_MOUSE	BRISC and BRCA1-A complex member 1 OS=Mus musculus OX=10090 GN=Babam1 PE=1 SV=1	1	2	13.2	36.793	333	0	22.942	0//0	1//0	0//0	20453000	14	2			-1	1461000		1461000			26567000		SPL_6027		SPL_6027		1.58967e+07														0	23.4388	0
sp|Q3UJB9-2|EDC4_MOUSE	Edc4	sp|Q3UJB9-2|EDC4_MOUSE;sp|Q3UJB9|EDC4_MOUSE	sp|Q3UJB9-2|EDC4_MOUSE;sp|Q3UJB9|EDC4_MOUSE	Isoform 2 of Enhancer of mRNA-decapping protein 4 OS=Mus musculus OX=10090 GN=Edc4;Enhancer of mRNA-decapping protein 4 OS=Mus musculus OX=10090 GN=Edc4 PE=1 SV=2	2	18	19.9	150.65	1390	0	303.76	0//0	1//0	0//0	378490000	54	39			-1;-1	7009000		7009000			473960000		SPL_6027		SPL_6027		1.35984e+08														0	112.446	0
sp|Q3UJU9|RMD3_MOUSE	Rmdn3	sp|Q3UJU9|RMD3_MOUSE	sp|Q3UJU9|RMD3_MOUSE	Regulator of microtubule dynamics protein 3 OS=Mus musculus OX=10090 GN=Rmdn3 PE=1 SV=2	1	2	6.6	52.028	470	0	33.544	0//0	1//0	0//0	25046000	24	7			-1	1043600		1043600			32527000		SPL_6027		SPL_6027		1.94658e+07														0	16.7425	0
sp|Q3ULD5|MCCB_MOUSE	Mccc2	sp|Q3ULD5|MCCB_MOUSE	sp|Q3ULD5|MCCB_MOUSE	Methylcrotonoyl-CoA carboxylase beta chain, mitochondrial OS=Mus musculus OX=10090 GN=Mccc2 PE=1 SV=1	1	18	46.5	61.378	563	0	272.67	1//0	1//0	1//0	557180000	29	90			-1	19213000	3480600	5110900	10622000	370610000	214230000	336450000				1.21737e+08	4.30406e+07	9.6752e+07	-0.790741	0.261964735516373	-0.13951	0.388017118402282	0.651232	0.73757225433526	-1.49999	0.19212962962963	-0.331401	0.347600518806744	1.16859	0.825380710659898	115.916	81.9943	91.2452
sp|Q3UM29|COG7_MOUSE	Cog7	sp|Q3UM29|COG7_MOUSE	sp|Q3UM29|COG7_MOUSE	Conserved oligomeric Golgi complex subunit 7 OS=Mus musculus OX=10090 GN=Cog7 PE=1 SV=1	1	13	23.8	86.072	770	0	88.916	0//0	1//0	0//0	92232000	41	18			-1	2249600		2249600			122290000		SPL_6027		SPL_6027		3.15087e+07														0	36.0904	0
sp|Q3UMB9|WASC4_MOUSE	Washc4	sp|Q3UMB9|WASC4_MOUSE	sp|Q3UMB9|WASC4_MOUSE	WASH complex subunit 4 OS=Mus musculus OX=10090 GN=Washc4 PE=1 SV=2	1	2	2.1	136.37	1173	0.0021436	11.362	1//0	1//0	1//0	174270000	65	5			-1	2681000	213150	50930	2416900		4155600					3.64105e+07	2.57294e+06	7.6915e+07							-3.82286	0.0266203703703704	1.07891	0.721141374837873	4.90178	0.997969543147208	7.09861	0.817071	20.7617
sp|Q3UMR5|MCU_MOUSE	Mcu	sp|Q3UMR5|MCU_MOUSE;sp|Q3UMR5-2|MCU_MOUSE	sp|Q3UMR5|MCU_MOUSE	Calcium uniporter protein, mitochondrial OS=Mus musculus OX=10090 GN=Mcu PE=1 SV=2	2	6	22	39.681	350	0	61.325	0//0	1//0	0//0	79049000	17	14			-1;-1	4650000		4650000			95770000		SPL_6027		SPL_6027		4.9459e+07														0	74.6	0
sp|Q3UPL0-2|SC31A_MOUSE	Sec31a	sp|Q3UPL0-2|SC31A_MOUSE;sp|Q3UPL0|SC31A_MOUSE	sp|Q3UPL0-2|SC31A_MOUSE;sp|Q3UPL0|SC31A_MOUSE	Isoform 2 of Protein transport protein Sec31A OS=Mus musculus OX=10090 GN=Sec31a;Protein transport protein Sec31A OS=Mus musculus OX=10090 GN=Sec31a PE=1 SV=2	2	2	2.7	129.56	1191	0.00060753	17.209	1//0	1//0	1//0	87841000	45	8			-1;-1	1952000	168410	226880	1556700	25233000	21196000	58260000				1.99158e+07	7.93491e+06	3.42982e+07	-0.25152	0.387909319899244	1.20719	0.820256776034237	1.45871	0.887861271676301	-1.32763	0.206018518518519	0.784219	0.652399481193256	2.11185	0.912690355329949	5.60862	3.63984	13.3724
sp|Q3URD3-4|SLMAP_MOUSE	Slmap	sp|Q3URD3-4|SLMAP_MOUSE;sp|Q3URD3-3|SLMAP_MOUSE;sp|Q3URD3-5|SLMAP_MOUSE;sp|Q3URD3-2|SLMAP_MOUSE;sp|Q3URD3|SLMAP_MOUSE	sp|Q3URD3-4|SLMAP_MOUSE;sp|Q3URD3-3|SLMAP_MOUSE;sp|Q3URD3-5|SLMAP_MOUSE;sp|Q3URD3-2|SLMAP_MOUSE;sp|Q3URD3|SLMAP_MOUSE	Isoform 4 of Sarcolemmal membrane-associated protein OS=Mus musculus OX=10090 GN=Slmap;Isoform 3 of Sarcolemmal membrane-associated protein OS=Mus musculus OX=10090 GN=Slmap;Isoform 5 of Sarcolemmal membrane-associated protein OS=Mus musculus OX=10090 GN=S	5	8	27	41.864	359	0	75.804	0//0	1//0	0//0	62669000	25	11			-1;-1;-1;-1;-1	2506800		2506800			79165000		SPL_6027		SPL_6027		3.98385e+07														0	40.2166	0
sp|Q3URF8|KCD21_MOUSE	Kctd21	sp|Q3URF8|KCD21_MOUSE	sp|Q3URF8|KCD21_MOUSE	BTB/POZ domain-containing protein KCTD21 OS=Mus musculus OX=10090 GN=Kctd21 PE=1 SV=1	1	2	13.1	29.623	260	0.0021231	10.872	1//0	0//0	0//0	1436400	12	1			-1	119700	119700			6876300			SPL_M	SPL_M		3.77489e+06															3.98641	0	0
sp|Q3URS9-2|MITOK_MOUSE	Ccdc51	sp|Q3URS9-2|MITOK_MOUSE;sp|Q3URS9|MITOK_MOUSE	sp|Q3URS9-2|MITOK_MOUSE;sp|Q3URS9|MITOK_MOUSE	Isoform 2 of Mitochondrial potassium channel OS=Mus musculus OX=10090 GN=Ccdc51;Mitochondrial potassium channel OS=Mus musculus OX=10090 GN=Ccdc51 PE=1 SV=1	2	4	13.6	41.761	375	0	51.567	0//0	1//0	0//0	63601000	20	6			-1;-1	3180000		3180000			81769000		SPL_6027		SPL_6027		4.94318e+07														0	51.0168	0
sp|Q3USZ8|DIK2A_MOUSE	Dipk2a	sp|Q3USZ8|DIK2A_MOUSE	sp|Q3USZ8|DIK2A_MOUSE	Divergent protein kinase domain 2A OS=Mus musculus OX=10090 GN=Dipk2a PE=1 SV=2	1	2	7.2	49.462	430	0.0011758	15.072	0//0	1//0	0//0	22743000	19	3			-1	1197000		1197000			30160000		SPL_6027		SPL_6027		1.76761e+07														0	19.2035	0
sp|Q3UVL4|VPS51_MOUSE	Vps51	sp|Q3UVL4|VPS51_MOUSE;sp|Q3UVL4-2|VPS51_MOUSE;sp|Q3UVL4-3|VPS51_MOUSE	sp|Q3UVL4|VPS51_MOUSE;sp|Q3UVL4-2|VPS51_MOUSE	Vacuolar protein sorting-associated protein 51 homolog OS=Mus musculus OX=10090 GN=Vps51 PE=1 SV=2;Isoform 2 of Vacuolar protein sorting-associated protein 51 homolog OS=Mus musculus OX=10090 GN=Vps51	3	5	8.2	86.186	782	0	112.88	0//0	1//0	0//0	59948000	41	12			-1;-1;-1	1462200		1462200			76906000		SPL_6027		SPL_6027		3.46011e+07														0	23.4581	0
sp|Q3UZ39|LRRF1_MOUSE	Lrrfip1	sp|Q3UZ39|LRRF1_MOUSE;sp|Q3UZ39-3|LRRF1_MOUSE;sp|Q3UZ39-2|LRRF1_MOUSE;sp|Q91WK0-2|LRRF2_MOUSE;sp|Q91WK0|LRRF2_MOUSE	sp|Q3UZ39|LRRF1_MOUSE;sp|Q3UZ39-3|LRRF1_MOUSE;sp|Q3UZ39-2|LRRF1_MOUSE	Leucine-rich repeat flightless-interacting protein 1 OS=Mus musculus OX=10090 GN=Lrrfip1 PE=1 SV=2;Isoform 3 of Leucine-rich repeat flightless-interacting protein 1 OS=Mus musculus OX=10090 GN=Lrrfip1;Isoform 2 of Leucine-rich repeat flightless-interacting	5	4	8.2	79.248	729	0	35.275	1//0	1//0	1//0	151700000	35	14			-1;-1;-1;-1;-1	4334400	149310	336950	3848200	33116000	22410000	96518000				1.37336e+07	9.16579e+06	6.59416e+07	-0.563386	0.314861460957179	1.54327	0.874465049928673	2.10666	0.95606936416185	-0.583377	0.320601851851852	2.26348	0.892347600518807	2.84686	0.950253807106599	4.97252	5.40569	33.0568
sp|Q3UZA1-2|CPZIP_MOUSE	Rcsd1	sp|Q3UZA1-2|CPZIP_MOUSE;sp|Q3UZA1|CPZIP_MOUSE	sp|Q3UZA1-2|CPZIP_MOUSE;sp|Q3UZA1|CPZIP_MOUSE	Isoform 2 of CapZ-interacting protein OS=Mus musculus OX=10090 GN=Rcsd1;CapZ-interacting protein OS=Mus musculus OX=10090 GN=Rcsd1 PE=1 SV=1	2	6	32.5	40.857	382	0	57.091	1//0	1//0	1//0	330250000	20	34			-1;-1	16513000	6543800	1575600	8393200	566820000	64404000	156980000				2.93177e+08	2.44914e+07	8.21851e+07	-3.13767	0.0302267002518892	-1.85231	0.087018544935806	1.28536	0.858959537572254	-3.58142	0.0335648148148148	-1.83482	0.134889753566796	1.7466	0.879187817258883	217.93	25.2774	72.0993
sp|Q3V1L4|5NTC_MOUSE	Nt5c2	sp|Q3V1L4|5NTC_MOUSE	sp|Q3V1L4|5NTC_MOUSE	Cytosolic purine 5-nucleotidase OS=Mus musculus OX=10090 GN=Nt5c2 PE=1 SV=2	1	6	12.1	64.808	560	0	142.31	1//0	1//0	1//0	192890000	25	11			-1	7715600	560870	205640	6949100	77664000		134200000				3.68491e+07	3.99557e+06	8.16264e+07			0.789067	0.717546362339515			-3.20516	0.0439814814814815	1.14741	0.730220492866407	4.35256	0.990862944162437	18.6788	3.29909	59.6942
sp|Q3V3E1|UBS3A_MOUSE	Ubash3a	sp|Q3V3E1|UBS3A_MOUSE	sp|Q3V3E1|UBS3A_MOUSE	Ubiquitin-associated and SH3 domain-containing protein A OS=Mus musculus OX=10090 GN=Ubash3a PE=1 SV=1	1	3	6.1	70.144	624	0.00061728	17.876	1//0	0//0	0//0	4954700	32	5			-1	154830	154830			22624000			SPL_M	SPL_M		1.30208e+07															5.15636	0	0
sp|Q3V3R1|C1TM_MOUSE	Mthfd1l	sp|Q3V3R1|C1TM_MOUSE	sp|Q3V3R1|C1TM_MOUSE	Monofunctional C1-tetrahydrofolate synthase, mitochondrial OS=Mus musculus OX=10090 GN=Mthfd1l PE=1 SV=2	1	15	20.5	105.73	977	0	108.45	1//0	1//0	1//0	218760000	51	22			-1	4289400	148130	500440	3640900	48253000	42907000	133490000				1.98538e+07	1.74938e+07	5.07325e+07	-0.169406	0.406801007556675	1.46804	0.863052781740371	1.63745	0.910982658959538	-0.182573	0.394675925925926	1.35349	0.773022049286641	1.53607	0.86497461928934	4.93323	8.02857	31.2761
sp|Q3V4B5|COMD6_MOUSE	Commd6	sp|Q3V4B5|COMD6_MOUSE	sp|Q3V4B5|COMD6_MOUSE	COMM domain-containing protein 6 OS=Mus musculus OX=10090 GN=Commd6 PE=1 SV=1	1	6	80.5	9.7951	87	0	228.74	1//0	1//0	1//0	793120000	8	37			-1	99141000	12028000	23971000	63142000	344360000	292100000	483110000				2.03695e+08	1.33809e+08	2.42179e+08	-0.237455	0.392947103274559	0.488434	0.617689015691869	0.725889	0.763005780346821	-0.606234	0.318287037037037	0.249666	0.50064850843061	0.855901	0.780710659898477	400.573	384.567	542.403
sp|Q4KML4|ABRAL_MOUSE	Abracl	sp|Q4KML4|ABRAL_MOUSE	sp|Q4KML4|ABRAL_MOUSE	Costars family protein ABRACL OS=Mus musculus OX=10090 GN=Abracl PE=1 SV=1	1	2	35.8	9.0303	81	0.0011274	13.08	0//0	1//0	0//0	13573000	4	4			-1	3393300		3393300			17654000		SPL_6027		SPL_6027		1.05492e+07														0	54.4388	0
sp|Q4PJX1|ODR4_MOUSE	Odr4	sp|Q4PJX1|ODR4_MOUSE;sp|Q4PJX1-3|ODR4_MOUSE;sp|Q4PJX1-2|ODR4_MOUSE	sp|Q4PJX1|ODR4_MOUSE;sp|Q4PJX1-3|ODR4_MOUSE;sp|Q4PJX1-2|ODR4_MOUSE	Protein odr-4 homolog OS=Mus musculus OX=10090 GN=Odr4 PE=1 SV=2;Isoform 3 of Protein odr-4 homolog OS=Mus musculus OX=10090 GN=Odr4;Isoform 2 of Protein odr-4 homolog OS=Mus musculus OX=10090 GN=Odr4	3	12	39.8	49.997	447	0	125.31	0//0	1//0	1//0	159900000	21	28			-1;-1;-1	7614100		6957900	656150		184610000	10814000	SPL_6027	SPL_21358			5.11127e+07	6.74618e+06					-4.09351	0.0682080924855491					-2.92154	0.130964467005076	0	111.626	5.63646
sp|Q4QQM4|P5I11_MOUSE	Trp53i11	sp|Q4QQM4|P5I11_MOUSE	sp|Q4QQM4|P5I11_MOUSE	Tumor protein p53-inducible protein 11 OS=Mus musculus OX=10090 GN=Trp53i11 PE=1 SV=1	1	2	13.2	20.91	189	0	18.836	0//0	1//0	0//0	46290000	6	5			-1	7715000		7715000			58213000		SPL_6027		SPL_6027		3.59773e+07														0	123.772	0
sp|Q4VBE8|WDR18_MOUSE	Wdr18	sp|Q4VBE8|WDR18_MOUSE	sp|Q4VBE8|WDR18_MOUSE	WD repeat-containing protein 18 OS=Mus musculus OX=10090 GN=Wdr18 PE=1 SV=1	1	12	38.1	47.211	431	0	205.44	0//0	1//0	1//0	626870000	18	51			-1	34826000		27321000	7505400		608570000	142920000	SPL_6027	SPL_21358			2.07186e+08	6.38544e+07					-2.09022	0.206936416184971					-1.69807	0.277157360406091	0	438.311	64.4729
sp|Q4VC33|MAEA_MOUSE	Maea	sp|Q4VC33|MAEA_MOUSE;sp|Q4VC33-2|MAEA_MOUSE	sp|Q4VC33|MAEA_MOUSE;sp|Q4VC33-2|MAEA_MOUSE	E3 ubiquitin-protein transferase MAEA OS=Mus musculus OX=10090 GN=Maea PE=1 SV=1;Isoform 2 of E3 ubiquitin-protein transferase MAEA OS=Mus musculus OX=10090 GN=Maea	2	11	35.1	45.336	396	0	193.71	1//0	1//0	1//0	224340000	23	30			-1;-1	9754000	139630	6329000	3285400	16468000	212460000	35251000				8.43964e+06	6.81229e+07	3.69953e+07	3.68945	0.910579345088161	1.098	0.804564907275321	-2.59146	0.153757225433526	3.01289	0.886574074074074	2.13209	0.876783398184176	-0.880798	0.430456852791878	4.65015	101.536	28.2223
sp|Q569Z6|TR150_MOUSE	Thrap3	sp|Q569Z6|TR150_MOUSE	sp|Q569Z6|TR150_MOUSE	Thyroid hormone receptor-associated protein 3 OS=Mus musculus OX=10090 GN=Thrap3 PE=1 SV=1	1	2	3.4	108.18	951	0.0011527	14.12	1//0	1//0	0//0	20626000	43	4			-1	479680	60615	419060		21967000	12233000			SPL_M	SPL_6027	6.84984e+06	1.40052e+07		-0.84456	0.250629722921914					1.03182	0.607638888888889					2.01868	6.72299	0
sp|Q571I9|A16A1_MOUSE	Aldh16a1	sp|Q571I9|A16A1_MOUSE	sp|Q571I9|A16A1_MOUSE	Aldehyde dehydrogenase family 16 member A1 OS=Mus musculus OX=10090 GN=Aldh16a1 PE=1 SV=2	1	16	28.7	84.755	802	0	241.7	1//0	1//0	1//0	1208800000	22	86			-1	54944000	5310100	4699200	44934000	623490000	185800000	706760000				2.36048e+08	4.34306e+07	2.4099e+08	-1.74662	0.120906801007557	0.180854	0.486447931526391	1.92747	0.93757225433526	-2.4423	0.107638888888889	0.0298924	0.433203631647211	2.47219	0.930964467005076	176.844	75.3893	385.992
sp|Q58A65-6|JIP4_MOUSE	Spag9	sp|Q58A65-6|JIP4_MOUSE;sp|Q58A65-3|JIP4_MOUSE;sp|Q58A65-4|JIP4_MOUSE;sp|Q58A65-5|JIP4_MOUSE;sp|Q58A65-2|JIP4_MOUSE;sp|Q58A65|JIP4_MOUSE	sp|Q58A65-6|JIP4_MOUSE;sp|Q58A65-3|JIP4_MOUSE;sp|Q58A65-4|JIP4_MOUSE;sp|Q58A65-5|JIP4_MOUSE;sp|Q58A65-2|JIP4_MOUSE;sp|Q58A65|JIP4_MOUSE	Isoform 6 of C-Jun-amino-terminal kinase-interacting protein 4 OS=Mus musculus OX=10090 GN=Spag9;Isoform 3 of C-Jun-amino-terminal kinase-interacting protein 4 OS=Mus musculus OX=10090 GN=Spag9;Isoform 4 of C-Jun-amino-terminal kinase-interacting protein 4	6	2	2.5	125.35	1142	0.0021108	10.724	0//0	1//0	1//0	75168000	58	2			-1;-1;-1;-1;-1;-1	1296000		819610	476400		59065000		SPL_6027	SPL_21358			3.69471e+07	1.3528e+07											-1.44952	0.322842639593909	0	13.149	4.09237
sp|Q5DTM8|BRE1A_MOUSE	Rnf20	sp|Q5DTM8|BRE1A_MOUSE;sp|Q5DTM8-2|BRE1A_MOUSE	sp|Q5DTM8|BRE1A_MOUSE;sp|Q5DTM8-2|BRE1A_MOUSE	E3 ubiquitin-protein ligase BRE1A OS=Mus musculus OX=10090 GN=Rnf20 PE=1 SV=2;Isoform 2 of E3 ubiquitin-protein ligase BRE1A OS=Mus musculus OX=10090 GN=Rnf20	2	4	6	113.52	973	0	25.854	0//0	1//0	0//0	9623900	54	2			-1;-1	178220		178220			12110000		SPL_6027		SPL_6027		7.47985e+06														0	2.85919	0
sp|Q5EG47|AAPK1_MOUSE	Prkaa1	sp|Q5EG47|AAPK1_MOUSE	sp|Q5EG47|AAPK1_MOUSE	5-AMP-activated protein kinase catalytic subunit alpha-1 OS=Mus musculus OX=10090 GN=Prkaa1 PE=1 SV=2	1	2	4.7	63.928	559	0.0026233	10.45	0//0	1//0	1//0	6739500	25	1			-1	269580		269580			10241000		SPL_6027	SPL_21358			5.23802e+06	0													0	4.32488	0
sp|Q5KU39|VPS41_MOUSE	Vps41	sp|Q5KU39|VPS41_MOUSE	sp|Q5KU39|VPS41_MOUSE	Vacuolar protein sorting-associated protein 41 homolog OS=Mus musculus OX=10090 GN=Vps41 PE=1 SV=1	1	13	20.8	98.601	853	0	101.12	0//0	1//0	0//0	160940000	44	18			-1	3657700		3657700			208910000		SPL_6027		SPL_6027		4.8532e+07														0	58.6805	0
sp|Q5ND34|WDR81_MOUSE	Wdr81	sp|Q5ND34|WDR81_MOUSE;sp|Q5ND34-2|WDR81_MOUSE;sp|Q5ND34-3|WDR81_MOUSE	sp|Q5ND34|WDR81_MOUSE;sp|Q5ND34-2|WDR81_MOUSE;sp|Q5ND34-3|WDR81_MOUSE	WD repeat-containing protein 81 OS=Mus musculus OX=10090 GN=Wdr81 PE=1 SV=2;Isoform 2 of WD repeat-containing protein 81 OS=Mus musculus OX=10090 GN=Wdr81;Isoform 3 of WD repeat-containing protein 81 OS=Mus musculus OX=10090 GN=Wdr81	3	26	21.4	211.94	1934	0	317.16	1//0	1//0	1//0	507440000	83	53			-1;-1;-1	6113700	18833	5632800	462000	10653000	604330000					4.10793e+06	9.46451e+07	1.87745e+07	5.826	0.976070528967254					4.52604	0.959490740740741	2.19229	0.881971465629053	-2.33376	0.193908629441624	0.627202	90.3671	3.96868
sp|Q5SQX6|CYFP2_MOUSE	Cyfip2	sp|Q5SQX6|CYFP2_MOUSE	sp|Q5SQX6|CYFP2_MOUSE	Cytoplasmic FMR1-interacting protein 2 OS=Mus musculus OX=10090 GN=Cyfip2 PE=1 SV=2	1	11	10.1	145.66	1253	0	79.898	1//0	1//0	1//0	234480000	65	36			-1	3607400	379930	2081900	1145600	140690000	115530000	94475000				5.50111e+07	6.83599e+07	3.64562e+07	-0.284252	0.374055415617128	-0.574515	0.275320970042796	-0.290263	0.527167630057803	0.313429	0.47337962962963	-0.59356	0.295719844357977	-0.906989	0.428426395939086	12.6529	33.4	9.84094
sp|Q5SSH7-2|ZZEF1_MOUSE	Zzef1	sp|Q5SSH7-2|ZZEF1_MOUSE;sp|Q5SSH7|ZZEF1_MOUSE	sp|Q5SSH7-2|ZZEF1_MOUSE;sp|Q5SSH7|ZZEF1_MOUSE	Isoform 2 of Zinc finger ZZ-type and EF-hand domain-containing protein 1 OS=Mus musculus OX=10090 GN=Zzef1;Zinc finger ZZ-type and EF-hand domain-containing protein 1 OS=Mus musculus OX=10090 GN=Zzef1 PE=1 SV=2	2	8	5.1	324.44	2891	0	63.292	0//0	1//0	1//0	80333000	128	16			-1;-1	627600		388000	239600		67208000	21576000	SPL_6027	SPL_21358			2.49525e+07	1.50156e+07					-1.63921	0.264739884393064					-0.732726	0.457868020304569	0	6.22469	2.05821
sp|Q5SUA5|MYO1G_MOUSE	Myo1g	sp|Q5SUA5|MYO1G_MOUSE;sp|Q5SYD0-2|MYO1D_MOUSE;sp|Q5SYD0|MYO1D_MOUSE	sp|Q5SUA5|MYO1G_MOUSE	Unconventional myosin-Ig OS=Mus musculus OX=10090 GN=Myo1g PE=1 SV=1	3	10	12.6	117.23	1024	0	85.989	0//0	1//0	0//0	107630000	57	20			-1;-1;-1	1888200		1888200			136790000		SPL_6027		SPL_6027		3.32826e+07														0	30.2924	0
sp|Q5SUQ9-3|CTC1_MOUSE	Ctc1	sp|Q5SUQ9-3|CTC1_MOUSE;sp|Q5SUQ9-2|CTC1_MOUSE;sp|Q5SUQ9|CTC1_MOUSE	sp|Q5SUQ9-3|CTC1_MOUSE;sp|Q5SUQ9-2|CTC1_MOUSE;sp|Q5SUQ9|CTC1_MOUSE	Isoform 3 of CST complex subunit CTC1 OS=Mus musculus OX=10090 GN=Ctc1;Isoform 2 of CST complex subunit CTC1 OS=Mus musculus OX=10090 GN=Ctc1;CST complex subunit CTC1 OS=Mus musculus OX=10090 GN=Ctc1 PE=1 SV=2	3	2	3.1	106.6	966	0.0021494	11.479	1//0	1//0	0//0	7152800	41	3			-1;-1;-1	174460	29800	144660		8044400	4660600			SPL_M	SPL_6027	3.21085e+06	4.60965e+06		-0.787469	0.263224181360202					0.521703	0.498842592592593					0.99244	2.32078	0
sp|Q5SW19|CLU_MOUSE	Cluh	sp|Q5SW19|CLU_MOUSE;sp|Q5SW19-3|CLU_MOUSE;sp|Q5SW19-2|CLU_MOUSE	sp|Q5SW19|CLU_MOUSE;sp|Q5SW19-3|CLU_MOUSE;sp|Q5SW19-2|CLU_MOUSE	Clustered mitochondria protein homolog OS=Mus musculus OX=10090 GN=Cluh PE=1 SV=2;Isoform 3 of Clustered mitochondria protein homolog OS=Mus musculus OX=10090 GN=Cluh;Isoform 2 of Clustered mitochondria protein homolog OS=Mus musculus OX=10090 GN=Cluh	3	4	3.7	148.07	1315	0	31.28	1//0	1//0	0//0	41176000	71	6			-1;-1;-1	579940	299500	280440			24957000			SPL_M	SPL_6027	5.58828e+07	1.54752e+07								-1.85244	0.157407407407407					9.97435	4.4991	0
sp|Q5SWT3|S2535_MOUSE	Slc25a35	sp|Q5SWT3|S2535_MOUSE	sp|Q5SWT3|S2535_MOUSE	Solute carrier family 25 member 35 OS=Mus musculus OX=10090 GN=Slc25a35 PE=1 SV=2	1	2	6.7	32.63	300	0.0016565	12.414	0//0	1//0	0//0	25838000	21	4			-1	1230400		1230400			34509000		SPL_6027		SPL_6027		2.00813e+07														0	19.7393	0
sp|Q5SWU9|ACACA_MOUSE	Acaca	sp|Q5SWU9|ACACA_MOUSE;sp|Q5SWU9-2|ACACA_MOUSE	sp|Q5SWU9|ACACA_MOUSE;sp|Q5SWU9-2|ACACA_MOUSE	Acetyl-CoA carboxylase 1 OS=Mus musculus OX=10090 GN=Acaca PE=1 SV=1;Isoform 2 of Acetyl-CoA carboxylase 1 OS=Mus musculus OX=10090 GN=Acaca	2	5	2.8	265.25	2345	0	31.529	1//0	1//0	1//0	48012000	121	7			-1;-1	396800	20296	53333	323170		8918800	32930000				6.45383e+06	5.01558e+06	1.91447e+07					1.88448	0.930635838150289	-0.363738	0.357638888888889	1.56871	0.814526588845655	1.93245	0.889340101522843	0.675925	0.855622	2.7761
sp|Q5U458|DJC11_MOUSE	Dnajc11	sp|Q5U458|DJC11_MOUSE	sp|Q5U458|DJC11_MOUSE	DnaJ homolog subfamily C member 11 OS=Mus musculus OX=10090 GN=Dnajc11 PE=1 SV=2	1	8	18.6	63.232	559	0	108.58	0//0	1//0	0//0	151670000	27	18			-1	5617400		5617400			196950000		SPL_6027		SPL_6027		8.18967e+07														0	90.12	0
sp|Q5XJY5|COPD_MOUSE	Arcn1	sp|Q5XJY5|COPD_MOUSE	sp|Q5XJY5|COPD_MOUSE	Coatomer subunit delta OS=Mus musculus OX=10090 GN=Arcn1 PE=1 SV=2	1	29	51.9	57.229	511	0	323.31	1//0	1//0	1//0	1557600000	26	103			-1	59907000	1079200	31414000	27414000	187680000	922190000	672680000				3.98184e+07	3.17607e+08	2.00035e+08	2.29679	0.816120906801008	1.84165	0.905848787446505	-0.455144	0.484393063583815	2.99573	0.884259259259259	2.32874	0.901426718547341	-0.666994	0.477157360406091	35.941	503.975	235.492
sp|Q5XPI3|RN123_MOUSE	Rnf123	sp|Q5XPI3|RN123_MOUSE;sp|Q5XPI3-2|RN123_MOUSE	sp|Q5XPI3|RN123_MOUSE;sp|Q5XPI3-2|RN123_MOUSE	E3 ubiquitin-protein ligase RNF123 OS=Mus musculus OX=10090 GN=Rnf123 PE=1 SV=1;Isoform 2 of E3 ubiquitin-protein ligase RNF123 OS=Mus musculus OX=10090 GN=Rnf123	2	3	2.5	148.65	1314	0.00062035	18.099	0//0	1//0	1//0	56404000	56	6			-1;-1	1007200		777750	229470		28988000	36950000	SPL_6027	SPL_21358			3.38507e+07	6.29145e+06					0.350119	0.664739884393064					-2.42772	0.186802030456853	0	12.4775	1.97119
sp|Q60597-2|ODO1_MOUSE	Ogdh	sp|Q60597-2|ODO1_MOUSE;sp|Q60597|ODO1_MOUSE;sp|Q60597-4|ODO1_MOUSE;sp|Q60597-3|ODO1_MOUSE	sp|Q60597-2|ODO1_MOUSE;sp|Q60597|ODO1_MOUSE;sp|Q60597-4|ODO1_MOUSE;sp|Q60597-3|ODO1_MOUSE	Isoform 2 of 2-oxoglutarate dehydrogenase, mitochondrial OS=Mus musculus OX=10090 GN=Ogdh;2-oxoglutarate dehydrogenase, mitochondrial OS=Mus musculus OX=10090 GN=Ogdh PE=1 SV=3;Isoform 4 of 2-oxoglutarate dehydrogenase, mitochondrial OS=Mus musculus OX=100	4	16	21.6	115.42	1013	0	116.15	1//0	1//0	1//0	161630000	47	27			-1;-1;-1;-1	3438800	58943	2952800	427060	16224000	171160000					7.28041e+06	5.13695e+07	9.82721e+06	3.39914	0.897984886649874					2.81882	0.868055555555556	0.432762	0.570687418936446	-2.38606	0.188832487309645	1.963	47.3718	3.66853
sp|Q60605-2|MYL6_MOUSE	Myl6	sp|Q60605-2|MYL6_MOUSE	sp|Q60605-2|MYL6_MOUSE	Isoform Smooth muscle of Myosin light polypeptide 6 OS=Mus musculus OX=10090 GN=Myl6	1	13	80.8	16.961	151	0	323.31	1//0	1//0	1//0	4350000000	10	95			-1	435000000	28249000	338330000	68423000	1367200000	4160300000	709030000				4.52854e+08	1.3724e+09	2.31636e+08	1.60546	0.72544080604534	-0.947306	0.205420827389444	-2.55277	0.157225433526012	1.59958	0.706018518518518	-0.967185	0.238651102464332	-2.56677	0.166497461928934	940.786	5427.83	587.768
sp|Q60634-3|FLOT2_MOUSE	Flot2	sp|Q60634-3|FLOT2_MOUSE;sp|Q60634-2|FLOT2_MOUSE;sp|Q60634|FLOT2_MOUSE	sp|Q60634-3|FLOT2_MOUSE;sp|Q60634-2|FLOT2_MOUSE;sp|Q60634|FLOT2_MOUSE	Isoform 3 of Flotillin-2 OS=Mus musculus OX=10090 GN=Flot2;Isoform 2 of Flotillin-2 OS=Mus musculus OX=10090 GN=Flot2;Flotillin-2 OS=Mus musculus OX=10090 GN=Flot2 PE=1 SV=2	3	12	39.1	41.658	379	0	149.07	0//0	1//0	0//0	152700000	24	18			-1;-1;-1	6362500		6362500			194300000		SPL_6027		SPL_6027		4.73107e+07														0	102.074	0
sp|Q60675|LAMA2_MOUSE	Lama2	sp|Q60675|LAMA2_MOUSE	sp|Q60675|LAMA2_MOUSE	Laminin subunit alpha-2 OS=Mus musculus OX=10090 GN=Lama2 PE=1 SV=2	1	2	0.8	343.81	3118	0.003143	10.36	1//0	1//0	0//0	63810000	159	2			-1	401320	19471	381850		14587000				SPL_M	SPL_6027	8.13622e+06	4.71877e+07								2.53598	0.841435185185185					0.648449	6.12603	0
sp|Q60710|SAMH1_MOUSE	Samhd1	sp|Q60710|SAMH1_MOUSE	sp|Q60710|SAMH1_MOUSE	Deoxynucleoside triphosphate triphosphohydrolase SAMHD1 OS=Mus musculus OX=10090 GN=Samhd1 PE=1 SV=3	1	32	54.9	75.892	658	0	323.31	1//0	1//0	1//0	2815200000	37	182			-1	76087000	12675000	9788500	53624000	2040200000	524200000	1754100000				3.9122e+08	1.11547e+08	3.48068e+08	-1.96052	0.0957178841309824	-0.21798	0.368045649072753	1.74254	0.921387283236994	-1.81033	0.164351851851852	-0.16861	0.376134889753567	1.64172	0.869035532994924	422.12	157.037	460.641
sp|Q60737|CSK21_MOUSE	Csnk2a1	sp|Q60737|CSK21_MOUSE	sp|Q60737|CSK21_MOUSE	Casein kinase II subunit alpha OS=Mus musculus OX=10090 GN=Csnk2a1 PE=1 SV=2	1	9	33.5	45.133	391	0	178.24	1//0	1//0	1//0	350660000	18	41			-1	19481000	1039600	5451200	12990000	108020000	115750000	196360000				3.22044e+07	3.86883e+07	1.01019e+08	0.0997137	0.458438287153652	0.862203	0.744650499286733	0.762489	0.772254335260116	0.264642	0.467592592592593	1.6493	0.821011673151751	1.38466	0.844670050761421	34.6222	87.4537	111.587
sp|Q60749|KHDR1_MOUSE	Khdrbs1	sp|Q60749|KHDR1_MOUSE	sp|Q60749|KHDR1_MOUSE	KH domain-containing, RNA-binding, signal transduction-associated protein 1 OS=Mus musculus OX=10090 GN=Khdrbs1 PE=1 SV=2	1	7	16	48.37	443	0	196.41	1//0	1//0	1//0	601320000	12	35			-1	50110000	8469800	4306300	37334000	440010000	85161000	399930000				2.26074e+08	4.01631e+07	1.96159e+08	-2.36927	0.0692695214105793	-0.137789	0.38944365192582	2.23148	0.965317919075145	-2.49285	0.105324074074074	-0.20477	0.369649805447471	2.28808	0.921827411167513	282.073	69.086	320.707
sp|Q60766-2|IRGM1_MOUSE	Irgm1	sp|Q60766-2|IRGM1_MOUSE;sp|Q60766|IRGM1_MOUSE	sp|Q60766-2|IRGM1_MOUSE;sp|Q60766|IRGM1_MOUSE	Isoform 2 of Immunity-related GTPase family M protein 1 OS=Mus musculus OX=10090 GN=Irgm1;Immunity-related GTPase family M protein 1 OS=Mus musculus OX=10090 GN=Irgm1 PE=1 SV=1	2	4	13.7	44.887	393	0	30.609	0//0	1//0	0//0	13333000	18	6			-1;-1	740740		740740			17727000		SPL_6027		SPL_6027		1.03628e+07														0	11.8837	0
sp|Q60770-2|STXB3_MOUSE	Stxbp3	sp|Q60770-2|STXB3_MOUSE;sp|Q60770|STXB3_MOUSE	sp|Q60770-2|STXB3_MOUSE;sp|Q60770|STXB3_MOUSE	Isoform 2 of Syntaxin-binding protein 3 OS=Mus musculus OX=10090 GN=Stxbp3;Syntaxin-binding protein 3 OS=Mus musculus OX=10090 GN=Stxbp3 PE=1 SV=1	2	2	6	61.678	537	0.0011409	13.658	0//0	1//0	1//0	29544000	28	3			-1;-1	1055100		131480	923650		7220200	20333000	SPL_6027	SPL_21358			2.86131e+06	1.26621e+07					1.49371	0.894797687861272					2.14577	0.914720812182741	0	2.10934	7.93434
sp|Q60778|IKBB_MOUSE	Nfkbib	sp|Q60778|IKBB_MOUSE	sp|Q60778|IKBB_MOUSE	NF-kappa-B inhibitor beta OS=Mus musculus OX=10090 GN=Nfkbib PE=1 SV=2	1	2	10	37.965	359	0.0011869	15.471	0//0	1//0	0//0	15897000	13	3			-1	1222800		1222800			22246000		SPL_6027		SPL_6027		1.23553e+07														0	19.6174	0
sp|Q60809|CNOT7_MOUSE	Cnot7	sp|Q60809|CNOT7_MOUSE	sp|Q60809|CNOT7_MOUSE	CCR4-NOT transcription complex subunit 7 OS=Mus musculus OX=10090 GN=Cnot7 PE=1 SV=1	1	7	38.9	32.718	285	0	102.77	0//0	1//0	1//0	144490000	15	17			-1	9632900		6915700	2717200		119810000	47267000	SPL_6027	SPL_21358			5.82689e+07	1.99549e+07					-1.34184	0.312138728323699					-1.54598	0.304568527918782	0	110.949	23.3413
sp|Q60854|SPB6_MOUSE	Serpinb6	sp|Q60854|SPB6_MOUSE	sp|Q60854|SPB6_MOUSE	Serpin B6 OS=Mus musculus OX=10090 GN=Serpinb6 PE=1 SV=1	1	3	10.8	42.598	378	0	41.676	1//0	0//0	0//0	7860000	21	5			-1	374290	374290			36529000			SPL_M	SPL_M		2.0656e+07															12.4651	0	0
sp|Q60864|STIP1_MOUSE	Stip1	sp|Q60864|STIP1_MOUSE	sp|Q60864|STIP1_MOUSE	Stress-induced-phosphoprotein 1 OS=Mus musculus OX=10090 GN=Stip1 PE=1 SV=1	1	3	6.1	62.581	543	0	18.818	1//0	1//0	1//0	62857000	34	5			-1	1848700	89688	245390	1513700	14508000	10390000					8.01394e+06	6.48444e+06	2.51972e+07	-0.481653	0.335012594458438					-0.305529	0.369212962962963	1.65268	0.82230869001297	1.95821	0.893401015228426	2.98691	3.9368	13.003
sp|Q60865|CAPR1_MOUSE	Caprin1	sp|Q60865|CAPR1_MOUSE	sp|Q60865|CAPR1_MOUSE	Caprin-1 OS=Mus musculus OX=10090 GN=Caprin1 PE=1 SV=2	1	8	16.8	78.168	707	0	58.767	1//0	1//0	1//0	165870000	21	24			-1	7898600	1007400	1862400	5028900	101380000	45955000	93675000				3.86409e+07	3.03963e+07	4.58758e+07	-1.14148	0.202770780856423	-0.114037	0.398002853067047	1.02744	0.817341040462428	-0.346232	0.358796296296296	0.247606	0.498054474708171	0.593838	0.736040609137056	33.5498	29.8785	43.1993
sp|Q60866|PTER_MOUSE	Pter	sp|Q60866|PTER_MOUSE;sp|Q60866-2|PTER_MOUSE	sp|Q60866|PTER_MOUSE;sp|Q60866-2|PTER_MOUSE	Phosphotriesterase-related protein OS=Mus musculus OX=10090 GN=Pter PE=1 SV=1;Isoform 2 of Phosphotriesterase-related protein OS=Mus musculus OX=10090 GN=Pter	2	6	22.1	39.218	349	0	52.577	1//0	0//0	1//0	57128000	18	12			-1;-1	3173800	768190		2405600	64204000			SPL_M		SPL_21358	3.63387e+07		2.11998e+07									-0.777458	0.265888456549935			25.5833	0	20.6646
sp|Q60928|GGT1_MOUSE	Ggt1	sp|Q60928|GGT1_MOUSE	sp|Q60928|GGT1_MOUSE	Glutathione hydrolase 1 proenzyme OS=Mus musculus OX=10090 GN=Ggt1 PE=1 SV=1	1	4	7.9	61.562	568	0	48.032	0//0	1//0	0//0	12148000	27	4			-1	449920		449920			14350000		SPL_6027		SPL_6027		9.44142e+06														0	7.21807	0
sp|Q60930|VDAC2_MOUSE	Vdac2	sp|Q60930|VDAC2_MOUSE	sp|Q60930|VDAC2_MOUSE	Voltage-dependent anion-selective channel protein 2 OS=Mus musculus OX=10090 GN=Vdac2 PE=1 SV=2	1	13	58	31.732	295	0	323.31	0//0	1//0	1//0	934770000	15	50			-1	62318000		53761000	8556900		964870000	194740000	SPL_6027	SPL_21358			3.56747e+08	5.62925e+07					-2.30879	0.18728323699422					-2.66389	0.160406091370558	0	862.489	73.5055
sp|Q60931|VDAC3_MOUSE	Vdac3	sp|Q60931|VDAC3_MOUSE	sp|Q60931|VDAC3_MOUSE	Voltage-dependent anion-selective channel protein 3 OS=Mus musculus OX=10090 GN=Vdac3 PE=1 SV=1	1	9	41	30.752	283	0	323.31	0//0	1//0	0//0	344190000	14	28			-1	24585000		24585000			431960000		SPL_6027		SPL_6027		1.60286e+08														0	394.418	0
sp|Q60932-2|VDAC1_MOUSE	Vdac1	sp|Q60932-2|VDAC1_MOUSE;sp|Q60932|VDAC1_MOUSE	sp|Q60932-2|VDAC1_MOUSE;sp|Q60932|VDAC1_MOUSE	Isoform Mt-VDAC1 of Voltage-dependent anion-selective channel protein 1 OS=Mus musculus OX=10090 GN=Vdac1;Voltage-dependent anion-selective channel protein 1 OS=Mus musculus OX=10090 GN=Vdac1 PE=1 SV=3	2	24	84.8	30.755	283	0	323.31	0//0	1//0	1//0	3313800000	17	105			-1;-1	194930000		178030000	16899000		3739400000	296550000	SPL_6027	SPL_21358			9.32668e+08	1.1588e+08					-3.65646	0.0913294797687861					-3.00873	0.114720812182741	0	2856.14	145.166
sp|Q60953-2|PML_MOUSE	Pml	sp|Q60953-2|PML_MOUSE;sp|Q60953|PML_MOUSE	sp|Q60953-2|PML_MOUSE;sp|Q60953|PML_MOUSE	Isoform 2 of Protein PML OS=Mus musculus OX=10090 GN=Pml;Protein PML OS=Mus musculus OX=10090 GN=Pml PE=1 SV=3	2	5	8.8	93.262	839	0	38.297	0//0	1//0	0//0	57206000	38	8			-1;-1	1505400		1505400			75586000		SPL_6027		SPL_6027		3.21409e+07														0	24.1512	0
sp|Q60967|PAPS1_MOUSE	Papss1	sp|Q60967|PAPS1_MOUSE	sp|Q60967|PAPS1_MOUSE	Bifunctional 3-phosphoadenosine 5-phosphosulfate synthase 1 OS=Mus musculus OX=10090 GN=Papss1 PE=1 SV=1	1	5	14.4	70.793	624	0	33.955	1//0	1//0	1//0	15926000	32	10			-1	497700	402820	94881		59356000						3.12792e+07	2.35977e+06	0							-3.72848	0.03125					13.4153	1.52218	0
sp|Q60972|RBBP4_MOUSE	Rbbp4	sp|Q60972|RBBP4_MOUSE	sp|Q60972|RBBP4_MOUSE	Histone-binding protein RBBP4 OS=Mus musculus OX=10090 GN=Rbbp4 PE=1 SV=5	1	15	57.9	47.655	425	0	323.31	1//0	1//0	1//0	1606400000	13	104			-1	123570000	13683000	45885000	64001000	800490000	560280000	945710000				3.03866e+08	2.49336e+08	2.66068e+08	-0.514735	0.324937027707809	0.240514	0.526390870185449	0.75525	0.769942196531792	-0.285344	0.372685185185185	-0.191642	0.37094682230869	0.0937021	0.646700507614213	455.69	736.134	549.782
sp|Q60973|RBBP7_MOUSE	Rbbp7	sp|Q60973|RBBP7_MOUSE	sp|Q60973|RBBP7_MOUSE	Histone-binding protein RBBP7 OS=Mus musculus OX=10090 GN=Rbbp7 PE=1 SV=1	1	6	40.2	47.789	425	0	107.76	1//0	1//0	1//0	469520000	15	35			-1	31301000	1151800	15616000	14533000	77559000	252370000	243470000				4.54026e+07	1.55896e+08	7.75892e+07	1.70217	0.740554156171285	1.65038	0.891583452211127	-0.0517964	0.575722543352601	1.77974	0.729166666666667	0.77308	0.651102464332036	-1.00666	0.406091370558376	38.3588	250.528	124.841
sp|Q61017|GBGT2_MOUSE	Gngt2	sp|Q61017|GBGT2_MOUSE	sp|Q61017|GBGT2_MOUSE	Guanine nucleotide-binding protein G(I)/G(S)/G(O) subunit gamma-T2 OS=Mus musculus OX=10090 GN=Gngt2 PE=3 SV=2	1	2	31.9	7.8019	69	0	19.462	0//0	1//0	0//0	21516000	3	6			-1	7171900		7171900			27667000		SPL_6027		SPL_6027		1.67223e+07														0	115.059	0
sp|Q61024|ASNS_MOUSE	Asns	sp|Q61024|ASNS_MOUSE	sp|Q61024|ASNS_MOUSE	Asparagine synthetase [glutamine-hydrolyzing] OS=Mus musculus OX=10090 GN=Asns PE=1 SV=3	1	13	28	64.282	561	0	113.28	1//0	1//0	1//0	263320000	30	36			-1	8777500	598260	1980000	6199200	94677000	88283000	131440000				3.59247e+07	2.83058e+07	7.55164e+07	-0.100878	0.418136020151133	0.473318	0.611982881597718	0.574197	0.720231213872832	-0.34388	0.361111111111111	1.07181	0.715953307392996	1.41569	0.847715736040609	19.9241	31.7652	53.2524
sp|Q61029-3|LAP2B_MOUSE	Tmpo	sp|Q61029-3|LAP2B_MOUSE;sp|Q61029|LAP2B_MOUSE;sp|Q61029-2|LAP2B_MOUSE;sp|Q61029-4|LAP2B_MOUSE;sp|Q61033-2|LAP2A_MOUSE;sp|Q61033|LAP2A_MOUSE	sp|Q61029-3|LAP2B_MOUSE;sp|Q61029|LAP2B_MOUSE;sp|Q61029-2|LAP2B_MOUSE;sp|Q61029-4|LAP2B_MOUSE	Isoform Epsilon of Lamina-associated polypeptide 2, isoforms beta/delta/epsilon/gamma OS=Mus musculus OX=10090 GN=Tmpo;Lamina-associated polypeptide 2, isoforms beta/delta/epsilon/gamma OS=Mus musculus OX=10090 GN=Tmpo PE=1 SV=4;Isoform Delta of Lamina-ass	6	7	29.9	46.049	412	0	83.781	1//0	1//0	1//0	146120000	21	20			-1;-1;-1;-1;-1;-1	6957900	213490	5133900	1610500		112460000	58739000				1.17818e+07	7.24843e+07	1.65588e+07					-0.937021	0.380346820809249	2.6211	0.846064814814815	0.49103	0.587548638132296	-2.13007	0.213197969543147	7.10993	82.3632	13.8345
sp|Q61037-7|TSC2_MOUSE	Tsc2	sp|Q61037-7|TSC2_MOUSE;sp|Q61037-6|TSC2_MOUSE;sp|Q61037-4|TSC2_MOUSE;sp|Q61037-3|TSC2_MOUSE;sp|Q61037-2|TSC2_MOUSE;sp|Q61037-5|TSC2_MOUSE;sp|Q61037|TSC2_MOUSE	sp|Q61037-7|TSC2_MOUSE;sp|Q61037-6|TSC2_MOUSE;sp|Q61037-4|TSC2_MOUSE;sp|Q61037-3|TSC2_MOUSE;sp|Q61037-2|TSC2_MOUSE;sp|Q61037-5|TSC2_MOUSE;sp|Q61037|TSC2_MOUSE	Isoform F of Tuberin OS=Mus musculus OX=10090 GN=Tsc2;Isoform E of Tuberin OS=Mus musculus OX=10090 GN=Tsc2;Isoform C of Tuberin OS=Mus musculus OX=10090 GN=Tsc2;Isoform B of Tuberin OS=Mus musculus OX=10090 GN=Tsc2;Isoform A of Tuberin OS=Mus musculus OX=	7	5	5	189.85	1704	0	40.875	0//0	1//0	1//0	38245000	80	7			-1;-1;-1;-1;-1;-1;-1	478060		478060			47780000		SPL_6027	SPL_21358			2.3679e+07	0													0	7.66952	0
sp|Q61070|EI24_MOUSE	Ei24	sp|Q61070|EI24_MOUSE	sp|Q61070|EI24_MOUSE	Etoposide-induced protein 2.4 OS=Mus musculus OX=10090 GN=Ei24 PE=1 SV=3	1	2	6.2	38.932	340	0.0021075	10.677	0//0	1//0	0//0	13896000	13	1			-1	1068900		1068900			16143000		SPL_6027		SPL_6027		1.08003e+07														0	17.1484	0
sp|Q61081|CDC37_MOUSE	Cdc37	sp|Q61081|CDC37_MOUSE	sp|Q61081|CDC37_MOUSE	Hsp90 co-chaperone Cdc37 OS=Mus musculus OX=10090 GN=Cdc37 PE=1 SV=1	1	4	16.9	44.593	379	0	55.656	1//0	1//0	1//0	19312000	17	6			-1	1136000	146700	989270		16949000	12532000					6.55377e+06	1.0542e+07	0	-0.435583	0.347607052896725					0.685744	0.530092592592593					4.8856	15.8709	0
sp|Q61093|CY24B_MOUSE	Cybb	sp|Q61093|CY24B_MOUSE	sp|Q61093|CY24B_MOUSE	Cytochrome b-245 heavy chain OS=Mus musculus OX=10090 GN=Cybb PE=1 SV=1	1	3	8.1	65.304	570	0	30.549	0//0	1//0	0//0	34062000	27	7			-1	1261500		1261500			42070000		SPL_6027		SPL_6027		2.64731e+07														0	20.2383	0
sp|Q61103|REQU_MOUSE	Dpf2	sp|Q61103|REQU_MOUSE	sp|Q61103|REQU_MOUSE	Zinc finger protein ubi-d4 OS=Mus musculus OX=10090 GN=Dpf2 PE=1 SV=1	1	3	11	44.229	391	0	132.75	1//0	1//0	1//0	122930000	21	17			-1	5854000	311170	1151100	4391700	40482000	17656000	79731000				1.71728e+07	1.87877e+07	4.51531e+07	-1.19712	0.190176322418136	0.97786	0.780313837375178	2.17498	0.958381502890173	0.129659	0.446759259259259	1.3947	0.779507133592737	1.26504	0.833502538071066	10.363	18.4671	37.7256
sp|Q61152|PTN18_MOUSE	Ptpn18	sp|Q61152|PTN18_MOUSE	sp|Q61152|PTN18_MOUSE	Tyrosine-protein phosphatase non-receptor type 18 OS=Mus musculus OX=10090 GN=Ptpn18 PE=1 SV=1	1	2	10.8	50.201	453	0	65.03	1//0	0//0	1//0	153400000	26	14			-1	5899900	1962700		3937300	233820000		89112000	SPL_M		SPL_21358	1.34104e+08		5.01193e+07			-1.39171	0.136947218259629					-1.41992	0.184176394293126			65.3645	0	33.8222
sp|Q61171|PRDX2_MOUSE	Prdx2	sp|Q61171|PRDX2_MOUSE	sp|Q61171|PRDX2_MOUSE	Peroxiredoxin-2 OS=Mus musculus OX=10090 GN=Prdx2 PE=1 SV=3	1	8	53	21.778	198	0	74.834	1//0	1//0	1//0	226010000	10	31			-1	22601000	8271400	1077300	13252000	290300000	33917000	180540000				1.73985e+08	8.37275e+06	6.09006e+07	-3.09746	0.0314861460957179	-0.685226	0.256776034236805	2.41224	0.974566473988439	-4.37712	0.0162037037037037	-1.51444	0.168612191958495	2.86268	0.952284263959391	275.465	17.2831	113.837
sp|Q61187|TS101_MOUSE	Tsg101	sp|Q61187|TS101_MOUSE	sp|Q61187|TS101_MOUSE	Tumor susceptibility gene 101 protein OS=Mus musculus OX=10090 GN=Tsg101 PE=1 SV=2	1	6	23.3	44.123	391	0	39.55	0//0	1//0	0//0	56039000	16	9			-1	3502400		3502400			75888000		SPL_6027		SPL_6027		3.01654e+07														0	56.1891	0
sp|Q61207|SAP_MOUSE	Psap	sp|Q61207|SAP_MOUSE	sp|Q61207|SAP_MOUSE	Prosaposin OS=Mus musculus OX=10090 GN=Psap PE=1 SV=2	1	14	30.5	61.422	557	0	323.31	1//0	1//0	1//0	10740000000	31	95			-1	346460000	3808400	326060000	16597000	1209300000	12276000000	688860000				2.85275e+08	6.57476e+09	2.44055e+08	3.3436	0.891687657430731	-0.811889	0.231098430813124	-4.15549	0.0647398843930636	4.52652	0.960648148148148	-0.225145	0.365758754863813	-4.75166	0.0324873096446701	126.832	5230.99	142.572
sp|Q61210|ARHG1_MOUSE	Arhgef1	sp|Q61210|ARHG1_MOUSE;sp|Q61210-4|ARHG1_MOUSE;sp|Q61210-3|ARHG1_MOUSE	sp|Q61210|ARHG1_MOUSE;sp|Q61210-4|ARHG1_MOUSE;sp|Q61210-3|ARHG1_MOUSE	Rho guanine nucleotide exchange factor 1 OS=Mus musculus OX=10090 GN=Arhgef1 PE=1 SV=2;Isoform 4 of Rho guanine nucleotide exchange factor 1 OS=Mus musculus OX=10090 GN=Arhgef1;Isoform 3 of Rho guanine nucleotide exchange factor 1 OS=Mus musculus OX=10090	3	11	20.5	102.8	920	0	176.6	1//0	1//0	1//0	379110000	45	44			-1;-1;-1	8424600	1123500	2993000	4308100	214850000	156960000	199200000				9.69876e+07	6.51226e+07	7.91431e+07	-0.452933	0.341309823677582	-0.109112	0.399429386590585	0.343821	0.661271676300578	-0.574642	0.322916666666667	-0.293337	0.351491569390402	0.281305	0.680203045685279	37.4163	48.0168	37.0075
sp|Q61216|MRE11_MOUSE	Mre11	sp|Q61216|MRE11_MOUSE;sp|Q61216-2|MRE11_MOUSE	sp|Q61216|MRE11_MOUSE;sp|Q61216-2|MRE11_MOUSE	Double-strand break repair protein MRE11 OS=Mus musculus OX=10090 GN=Mre11 PE=1 SV=1;Isoform 2 of Double-strand break repair protein MRE11 OS=Mus musculus OX=10090 GN=Mre11	2	3	5.1	80.222	706	0	19.005	0//0	1//0	1//0	2573200	33	4			-1;-1	77977		77977			3873400		SPL_6027	SPL_21358			1.99992e+06	0													0	1.25099	0
sp|Q61233|PLSL_MOUSE	Lcp1	sp|Q61233|PLSL_MOUSE;sp|Q99K51|PLST_MOUSE	sp|Q61233|PLSL_MOUSE	Plastin-2 OS=Mus musculus OX=10090 GN=Lcp1 PE=1 SV=4	2	9	19.5	70.148	627	0	78.699	1//0	1//0	1//0	98893000	38	19			-1;-1	2602500	60124	827820	1714500		23397000	71779000				6.00421e+06	2.00665e+07	3.18979e+07					1.61724	0.908670520231214	1.74075	0.724537037037037	2.40942	0.909208819714656	0.668671	0.751269035532995	2.00233	13.2807	14.7279
sp|Q61235|SNTB2_MOUSE	Sntb2	sp|Q61235|SNTB2_MOUSE	sp|Q61235|SNTB2_MOUSE	Beta-2-syntrophin OS=Mus musculus OX=10090 GN=Sntb2 PE=1 SV=2	1	6	14.2	56.381	520	0	45.097	0//0	1//0	0//0	49070000	26	11			-1	1887300		1887300			63943000		SPL_6027		SPL_6027		2.58264e+07														0	30.278	0
sp|Q61239|FNTA_MOUSE	Fnta	sp|Q61239|FNTA_MOUSE	sp|Q61239|FNTA_MOUSE	Protein farnesyltransferase/geranylgeranyltransferase type-1 subunit alpha OS=Mus musculus OX=10090 GN=Fnta PE=1 SV=1	1	2	12.2	44.013	377	0.0016538	12.361	1//0	0//0	0//0	1929400	16	2			-1	120590	120590			8483300			SPL_M	SPL_M		5.07051e+06															4.01605	0	0
sp|Q61249|IGBP1_MOUSE	Igbp1	sp|Q61249|IGBP1_MOUSE;sp|Q9QZ29|IGB1B_MOUSE	sp|Q61249|IGBP1_MOUSE	Immunoglobulin-binding protein 1 OS=Mus musculus OX=10090 GN=Igbp1 PE=1 SV=1	2	3	14.4	38.97	340	0	53.06	0//0	1//0	1//0	46795000	18	8			-1;-1	2599700		866590	1733200		26576000	18079000	SPL_6027	SPL_21358			1.21234e+07	1.52738e+07					-0.555809	0.46242774566474					0.333262	0.690355329949239	0	13.9027	14.8885
sp|Q61263|SOAT1_MOUSE	Soat1	sp|Q61263|SOAT1_MOUSE	sp|Q61263|SOAT1_MOUSE	Sterol O-acyltransferase 1 OS=Mus musculus OX=10090 GN=Soat1 PE=1 SV=2	1	2	5.7	63.798	540	0.00061463	17.734	0//0	1//0	0//0	53723000	22	6			-1	2442000		2442000			69455000		SPL_6027		SPL_6027		4.17541e+07														0	39.177	0
sp|Q61334|BAP29_MOUSE	Bcap29	sp|Q61334|BAP29_MOUSE	sp|Q61334|BAP29_MOUSE	B-cell receptor-associated protein 29 OS=Mus musculus OX=10090 GN=Bcap29 PE=1 SV=1	1	3	10	27.964	240	0	31.577	0//0	1//0	0//0	43767000	13	8			-1	3366700		3366700			56022000		SPL_6027		SPL_6027		3.40166e+07														0	54.012	0
sp|Q61335|BAP31_MOUSE	Bcap31	sp|Q61335|BAP31_MOUSE	sp|Q61335|BAP31_MOUSE	B-cell receptor-associated protein 31 OS=Mus musculus OX=10090 GN=Bcap31 PE=1 SV=4	1	9	39.2	27.956	245	0	185.23	0//0	1//0	1//0	503530000	14	37			-1	35967000		35595000	371970		638930000	5758700	SPL_6027	SPL_21358			2.43904e+08	2.54962e+06					-6.79377	0.0069364161849711					-6.57989	0.0050761421319797	0	571.051	3.1953
sp|Q61387|COX7R_MOUSE	Cox7a2l	sp|Q61387|COX7R_MOUSE	sp|Q61387|COX7R_MOUSE	Cytochrome c oxidase subunit 7A-related protein, mitochondrial OS=Mus musculus OX=10090 GN=Cox7a2l PE=1 SV=1	1	5	56.8	12.399	111	0	45.679	1//0	1//0	0//0	81078000	5	12			-1	16216000	2248200	13967000		57423000	83621000			SPL_M	SPL_6027	2.95416e+07	4.818e+07		0.542237	0.556675062972292					0.705687	0.534722222222222					74.8726	224.073	0
sp|Q61462-2|CY24A_MOUSE	Cyba	sp|Q61462-2|CY24A_MOUSE;sp|Q61462|CY24A_MOUSE	sp|Q61462-2|CY24A_MOUSE;sp|Q61462|CY24A_MOUSE	Isoform 2 of Cytochrome b-245 light chain OS=Mus musculus OX=10090 GN=Cyba;Cytochrome b-245 light chain OS=Mus musculus OX=10090 GN=Cyba PE=1 SV=3	2	4	32.3	17.593	164	0	32.738	0//0	1//0	0//0	178450000	5	12			-1;-1	35690000		35690000			232180000		SPL_6027		SPL_6027		1.30894e+08														0	572.575	0
sp|Q61510|TRI25_MOUSE	Trim25	sp|Q61510|TRI25_MOUSE	sp|Q61510|TRI25_MOUSE	E3 ubiquitin/ISG15 ligase TRIM25 OS=Mus musculus OX=10090 GN=Trim25 PE=1 SV=2	1	8	18.6	71.726	634	0	79.282	1//0	1//0	1//0	81331000	34	18			-1	2392100	370610	1204400	817080	49624000	36620000	48931000				3.31148e+07	2.85016e+07	1.36011e+07	-0.438406	0.346347607052897	-0.0202893	0.42225392296719	0.418117	0.686705202312139	-0.216433	0.390046296296296	-1.28376	0.199740596627756	-1.06732	0.392893401015228	12.3426	19.3222	7.01889
sp|Q61543|GSLG1_MOUSE	Glg1	sp|Q61543|GSLG1_MOUSE	sp|Q61543|GSLG1_MOUSE	Golgi apparatus protein 1 OS=Mus musculus OX=10090 GN=Glg1 PE=1 SV=1	1	3	2.9	133.73	1175	0	19.342	0//0	1//0	0//0	20150000	60	3			-1	335840		335840			24792000		SPL_6027		SPL_6027		1.5661e+07														0	5.38789	0
sp|Q61549|AGRE1_MOUSE	Adgre1	sp|Q61549|AGRE1_MOUSE	sp|Q61549|AGRE1_MOUSE	Adhesion G protein-coupled receptor E1 OS=Mus musculus OX=10090 GN=Adgre1 PE=1 SV=1	1	2	4.9	102.13	931	0.001182	15.277	0//0	1//0	0//0	18369000	22	4			-1	834950		834950			22527000		SPL_6027		SPL_6027		1.42765e+07														0	13.3951	0
sp|Q61598-2|GDIB_MOUSE	Gdi2	sp|Q61598-2|GDIB_MOUSE;sp|Q61598|GDIB_MOUSE;sp|P50396|GDIA_MOUSE	sp|Q61598-2|GDIB_MOUSE;sp|Q61598|GDIB_MOUSE	Isoform 2 of Rab GDP dissociation inhibitor beta OS=Mus musculus OX=10090 GN=Gdi2;Rab GDP dissociation inhibitor beta OS=Mus musculus OX=10090 GN=Gdi2 PE=1 SV=1	3	4	14.9	46.657	409	0	28.177	1//0	0//0	0//0	10178000	26	3			-1;-1;-1	391470	391470			47898000			SPL_M	SPL_M		2.40771e+07															13.0373	0	0
sp|Q61599|GDIR2_MOUSE	Arhgdib	sp|Q61599|GDIR2_MOUSE	sp|Q61599|GDIR2_MOUSE	Rho GDP-dissociation inhibitor 2 OS=Mus musculus OX=10090 GN=Arhgdib PE=1 SV=3	1	5	51	22.851	200	0	58.849	1//0	0//0	1//0	144890000	11	19			-1	13171000	1717800		11454000	78465000		116940000	SPL_M		SPL_21358	4.27849e+07		6.16851e+07			0.575647	0.650499286733238					0.52782	0.597924773022049			57.2085	0	98.3922
sp|Q61656|DDX5_MOUSE	Ddx5	sp|Q61656|DDX5_MOUSE;sp|Q501J6|DDX17_MOUSE;sp|Q501J6-2|DDX17_MOUSE	sp|Q61656|DDX5_MOUSE	Probable ATP-dependent RNA helicase DDX5 OS=Mus musculus OX=10090 GN=Ddx5 PE=1 SV=2	3	12	22.6	69.289	614	0	169.98	1//0	1//0	1//0	349020000	33	32			-1;-1;-1	10576000	498170	638570	9439500	101040000	30152000	238570000				3.54608e+07	1.49261e+07	9.85941e+07	-1.7446	0.122166246851385	1.23949	0.825962910128388	2.98409	0.983815028901734	-1.24839	0.215277777777778	1.47528	0.793774319066148	2.72367	0.944162436548223	16.5907	10.2446	81.0873
sp|Q61696|HS71A_MOUSE	Hspa1a	sp|Q61696|HS71A_MOUSE;sp|P17879|HS71B_MOUSE	sp|Q61696|HS71A_MOUSE;sp|P17879|HS71B_MOUSE	Heat shock 70 kDa protein 1A OS=Mus musculus OX=10090 GN=Hspa1a PE=1 SV=2;Heat shock 70 kDa protein 1B OS=Mus musculus OX=10090 GN=Hspa1b PE=1 SV=3	2	2	12	70.078	641	0.0021053	10.625	0//1	1//0	0//1	13078000	33	2			-1;-1	396310		396310			16202000		SPL_6027		SPL_6027		1.01646e+07														0	6.35801	0
sp|Q61753|SERA_MOUSE	Phgdh	sp|Q61753|SERA_MOUSE	sp|Q61753|SERA_MOUSE	D-3-phosphoglycerate dehydrogenase OS=Mus musculus OX=10090 GN=Phgdh PE=1 SV=3	1	26	56.3	56.585	533	0	323.31	1//0	1//0	1//0	5594200000	20	157			-1	279710000	1170100	203130000	75416000	127840000	4999100000	1523600000				4.90799e+07	9.63209e+08	3.74316e+08	5.28926	0.968513853904282	3.57507	0.978601997146933	-1.71418	0.254335260115607	4.29465	0.951388888888889	2.93105	0.949416342412451	-1.36359	0.33502538071066	38.9682	3258.82	647.839
sp|Q61768|KINH_MOUSE	Kif5b	sp|Q61768|KINH_MOUSE;sp|P28738|KIF5C_MOUSE;sp|P33175|KIF5A_MOUSE	sp|Q61768|KINH_MOUSE	Kinesin-1 heavy chain OS=Mus musculus OX=10090 GN=Kif5b PE=1 SV=3	3	36	50.3	109.55	963	0	323.31	1//0	1//0	1//0	2487500000	58	163			-1;-1;-1	42889000	499930	13636000	28753000	139420000	967940000	1455800000				4.19977e+07	1.67498e+08	4.66383e+08	2.79548	0.858942065491184	3.3843	0.97432239657632	0.588823	0.72485549132948	1.99576	0.759259259259259	3.47313	0.96757457846952	1.47737	0.855837563451777	16.6493	218.763	246.994
sp|Q61792|LASP1_MOUSE	Lasp1	sp|Q61792|LASP1_MOUSE;sp|Q9DC07|LNEBL_MOUSE	sp|Q61792|LASP1_MOUSE	LIM and SH3 domain protein 1 OS=Mus musculus OX=10090 GN=Lasp1 PE=1 SV=1	2	4	17.9	29.994	263	0	23.238	1//0	1//0	0//0	15124000	14	5			-1;-1	1080300	867220	213060		55186000				SPL_M	SPL_6027	3.19066e+07	2.31827e+06								-3.78274	0.0289351851851852					28.8813	3.41813	0
sp|Q61823|PDCD4_MOUSE	Pdcd4	sp|Q61823|PDCD4_MOUSE	sp|Q61823|PDCD4_MOUSE	Programmed cell death protein 4 OS=Mus musculus OX=10090 GN=Pdcd4 PE=1 SV=1	1	6	21.3	51.702	469	0	74.231	1//0	1//0	1//0	85114000	23	18			-1	3700600	37313	3084800	578510	8250500	83093000	12455000				2.25534e+06	3.79131e+07	6.51442e+06	3.33217	0.890428211586902	0.594172	0.659058487874465	-2.738	0.139884393063584	4.07128	0.940972222222222	1.53029	0.804150453955901	-2.54099	0.168527918781726	1.24265	49.4895	4.96952
sp|Q61838|PZP_MOUSE	Pzp	sp|Q61838|PZP_MOUSE	sp|Q61838|PZP_MOUSE	Pregnancy zone protein OS=Mus musculus OX=10090 GN=Pzp PE=1 SV=3	1	5	6	165.85	1495	0	32.523	1//0	1//0	1//0	22668000	61	8			-1	371610	114490	161640	95483	30445000	16436000					1.83531e+07	7.66339e+06	2.85165e+06	-0.889346	0.245591939546599					-1.25997	0.212962962962963	-2.68616	0.0583657587548638	-1.42619	0.325888324873096	3.8129	2.59319	0.820219
sp|Q61879|MYH10_MOUSE	Myh10	sp|Q61879|MYH10_MOUSE;sp|P13542|MYH8_MOUSE;sp|Q28641|MYH4_RABIT;CON__sp|Q28641|MYH4_RABIT;sp|Q5SX39|MYH4_MOUSE;sp|P13541|MYH3_MOUSE;sp|A2AQP0|MYH7B_MOUSE;sp|Q5SX40|MYH1_MOUSE	sp|Q61879|MYH10_MOUSE	Myosin-10 OS=Mus musculus OX=10090 GN=Myh10 PE=1 SV=2	8	4	12.5	228.99	1976	0	32.339	0//1	1//0	0//1	8702700	100	5			-1;-1;-1;-1;-1;-1;-1;-1	87027		87027			11182000		SPL_6027		SPL_6027		6.76389e+06														0	1.39618	0
sp|Q61881|MCM7_MOUSE	Mcm7	sp|Q61881|MCM7_MOUSE	sp|Q61881|MCM7_MOUSE	DNA replication licensing factor MCM7 OS=Mus musculus OX=10090 GN=Mcm7 PE=1 SV=1	1	13	19.1	81.21	719	0	245.01	1//0	1//0	1//0	555880000	39	47			-1	14253000	125410	11257000	2870600	38188000	571590000	80317000				1.28537e+07	2.02034e+08	5.48115e+07	3.90379	0.919395465994962	1.07259	0.79885877318117	-2.8312	0.136416184971098	3.97434	0.931712962962963	2.09229	0.867704280155642	-1.88205	0.247715736040609	4.17657	180.596	24.659
sp|Q61937|NPM_MOUSE	Npm1	sp|Q61937|NPM_MOUSE	sp|Q61937|NPM_MOUSE	Nucleophosmin OS=Mus musculus OX=10090 GN=Npm1 PE=1 SV=1	1	4	24.3	32.56	292	0	41.086	1//0	1//0	1//0	93481000	12	6			-1	7790100	342460	1613300	5834400			60327000				1.07996e+07	1.50461e+07	3.42778e+07							0.478411	0.490740740740741	1.66629	0.824902723735409	1.18788	0.82741116751269	11.4051	25.8822	50.1187
sp|Q61941|NNTM_MOUSE	Nnt	sp|Q61941|NNTM_MOUSE	sp|Q61941|NNTM_MOUSE	NAD(P) transhydrogenase, mitochondrial OS=Mus musculus OX=10090 GN=Nnt PE=1 SV=2	1	13	18.1	113.84	1086	0	111.3	0//0	1//0	0//0	203040000	41	27			-1	4952100		4952100			263080000		SPL_6027		SPL_6027		7.01139e+07														0	79.4466	0
sp|Q61990-2|PCBP2_MOUSE	Pcbp2	sp|Q61990-2|PCBP2_MOUSE;sp|Q61990-3|PCBP2_MOUSE;sp|Q61990|PCBP2_MOUSE;sp|P57722-2|PCBP3_MOUSE;sp|P57722|PCBP3_MOUSE	sp|Q61990-2|PCBP2_MOUSE;sp|Q61990-3|PCBP2_MOUSE;sp|Q61990|PCBP2_MOUSE;sp|P57722-2|PCBP3_MOUSE;sp|P57722|PCBP3_MOUSE	Isoform 2 of Poly(rC)-binding protein 2 OS=Mus musculus OX=10090 GN=Pcbp2;Isoform 3 of Poly(rC)-binding protein 2 OS=Mus musculus OX=10090 GN=Pcbp2;Poly(rC)-binding protein 2 OS=Mus musculus OX=10090 GN=Pcbp2 PE=1 SV=1;Isoform 2 of Poly(rC)-binding protein	5	4	25.7	34.917	331	0	31.285	1//0	1//0	1//0	241550000	15	18			-1;-1;-1;-1;-1	16103000	2138600	2751300	11214000	141160000	65594000	140770000				8.43026e+07	3.20754e+07	8.23514e+07	-1.1057	0.210327455919395	-0.00399143	0.43509272467903	1.1017	0.826589595375723	-1.39411	0.200231481481481	-0.0337836	0.416342412451362	1.36033	0.843654822335025	71.2225	44.1392	96.3306
sp|Q62086|PON2_MOUSE	Pon2	sp|Q62086|PON2_MOUSE	sp|Q62086|PON2_MOUSE	Serum paraoxonase/arylesterase 2 OS=Mus musculus OX=10090 GN=Pon2 PE=1 SV=2	1	4	18.9	39.617	354	0	38.829	0//0	1//0	0//0	55722000	13	11			-1	4286300		4286300			70617000		SPL_6027		SPL_6027		3.91851e+07														0	68.7652	0
sp|Q62087|PON3_MOUSE	Pon3	sp|Q62087|PON3_MOUSE	sp|Q62087|PON3_MOUSE	Serum paraoxonase/lactonase 3 OS=Mus musculus OX=10090 GN=Pon3 PE=1 SV=2	1	5	36.4	39.351	354	0	56.087	0//0	1//0	0//0	105500000	13	9			-1	8115400		8115400			133160000		SPL_6027		SPL_6027		7.31059e+07														0	130.196	0
sp|Q62167|DDX3X_MOUSE	Ddx3x	sp|Q62167|DDX3X_MOUSE;sp|P16381|DDX3L_MOUSE;sp|Q62095|DDX3Y_MOUSE;sp|Q61496|DDX4_MOUSE	sp|Q62167|DDX3X_MOUSE;sp|P16381|DDX3L_MOUSE;sp|Q62095|DDX3Y_MOUSE	ATP-dependent RNA helicase DDX3X OS=Mus musculus OX=10090 GN=Ddx3x PE=1 SV=3;Putative ATP-dependent RNA helicase Pl10 OS=Mus musculus OX=10090 GN=D1Pas1 PE=1 SV=1;ATP-dependent RNA helicase DDX3Y OS=Mus musculus OX=10090 GN=Ddx3y PE=1 SV=2	4	15	28.1	73.101	662	0	131.9	1//0	1//0	1//0	301580000	39	51			-1;-1;-1;-1	7732900	1277100	1513800	4942100	234010000	86476000	143030000				5.7782e+07	2.70877e+07	5.94168e+07	-1.4362	0.153652392947103	-0.710252	0.251069900142653	0.725946	0.764161849710983	-1.09298	0.232638888888889	0.0402491	0.43579766536965	1.13323	0.820304568527919	42.5317	24.2859	42.4537
sp|Q62186|SSRD_MOUSE	Ssr4	sp|Q62186|SSRD_MOUSE	sp|Q62186|SSRD_MOUSE	Translocon-associated protein subunit delta OS=Mus musculus OX=10090 GN=Ssr4 PE=1 SV=1	1	10	55.8	18.936	172	0	152.94	1//0	1//0	0//0	815620000	6	42			-1	135940000	1336600	134600000		31341000	1080700000			SPL_M	SPL_6027	2.10751e+07	3.22956e+08		5.10777	0.958438287153652					3.93773	0.929398148148148					44.5133	2159.39	0
sp|Q62188|DPYL3_MOUSE	Dpysl3	sp|Q62188|DPYL3_MOUSE	sp|Q62188|DPYL3_MOUSE	Dihydropyrimidinase-related protein 3 OS=Mus musculus OX=10090 GN=Dpysl3 PE=1 SV=1	1	19	59.8	61.936	570	0	244.87	1//0	1//0	1//0	862470000	29	72			-1	29740000	6580300	1846900	21313000	781900000	111390000	586140000				1.97298e+08	2.79822e+07	1.20362e+08	-2.81136	0.0453400503778338	-0.415739	0.315263908701855	2.39563	0.972254335260116	-2.8178	0.0648148148148148	-0.713001	0.277561608300908	2.10479	0.911675126903553	219.146	29.6298	183.083
sp|Q62189|SNRPA_MOUSE	Snrpa	sp|Q62189|SNRPA_MOUSE	sp|Q62189|SNRPA_MOUSE	U1 small nuclear ribonucleoprotein A OS=Mus musculus OX=10090 GN=Snrpa PE=1 SV=3	1	2	7	31.835	287	0.0011167	12.867	1//0	1//0	0//0	10552000	12	4			-1	879340	278250	601100		15477000	11161000			SPL_M	SPL_6027	8.77484e+06	5.60619e+06		-0.47166	0.337531486146096					-0.646353	0.30787037037037					9.26666	9.64346	0
sp|Q62192|CD180_MOUSE	Cd180	sp|Q62192|CD180_MOUSE	sp|Q62192|CD180_MOUSE	CD180 antigen OS=Mus musculus OX=10090 GN=Cd180 PE=1 SV=2	1	11	21.6	74.302	661	0	180.5	0//0	1//0	0//0	161550000	23	24			-1	7024000		7024000			215900000		SPL_6027		SPL_6027		7.02372e+07														0	112.686	0
sp|Q62203|SF3A2_MOUSE	Sf3a2	sp|Q62203|SF3A2_MOUSE	sp|Q62203|SF3A2_MOUSE	Splicing factor 3A subunit 2 OS=Mus musculus OX=10090 GN=Sf3a2 PE=1 SV=2	1	6	20.2	49.911	475	0	50.881	1//0	1//0	1//0	99176000	13	12			-1	7628900	424180	3968600	3236100	29201000	59778000	40695000				1.44914e+07	3.46536e+07	2.0597e+07	1.0336	0.654911838790932	0.478834	0.614835948644793	-0.554763	0.463583815028902	1.25781	0.638888888888889	0.507232	0.592736705577173	-0.750574	0.452791878172589	14.1266	63.6683	27.7988
sp|Q62219-7|TGFI1_MOUSE	Tgfb1i1	sp|Q62219-7|TGFI1_MOUSE;sp|Q62219-10|TGFI1_MOUSE;sp|Q62219-9|TGFI1_MOUSE;sp|Q62219-5|TGFI1_MOUSE;sp|Q62219-4|TGFI1_MOUSE;sp|Q62219-2|TGFI1_MOUSE;sp|Q62219|TGFI1_MOUSE;sp|Q62219-3|TGFI1_MOUSE	sp|Q62219-7|TGFI1_MOUSE;sp|Q62219-10|TGFI1_MOUSE;sp|Q62219-9|TGFI1_MOUSE;sp|Q62219-5|TGFI1_MOUSE;sp|Q62219-4|TGFI1_MOUSE;sp|Q62219-2|TGFI1_MOUSE;sp|Q62219|TGFI1_MOUSE;sp|Q62219-3|TGFI1_MOUSE	Isoform 7 of Transforming growth factor beta-1-induced transcript 1 protein OS=Mus musculus OX=10090 GN=Tgfb1i1;Isoform 10 of Transforming growth factor beta-1-induced transcript 1 protein OS=Mus musculus OX=10090 GN=Tgfb1i1;Isoform 9 of Transforming growt	8	2	8.6	38.289	350	0.002139	11.298	0//0	1//0	0//0	0	21	2			-1;-1;-1;-1;-1;-1;-1;-1	0							SPL_6027		SPL_6027		0														0	0	0
sp|Q62241|RU1C_MOUSE	Snrpc	sp|Q62241|RU1C_MOUSE	sp|Q62241|RU1C_MOUSE	U1 small nuclear ribonucleoprotein C OS=Mus musculus OX=10090 GN=Snrpc PE=1 SV=1	1	3	19.5	17.364	159	0	32.927	1//0	1//0	1//0	63936000	3	11			-1	21312000	1239000	13709000	6364100	27488000	31253000	26460000				9.76796e+06	3.1964e+07	9.34765e+06	0.185193	0.478589420654912	-0.0549889	0.415121255349501	-0.240182	0.535260115606936	1.71032	0.721064814814815	-0.0634532	0.409857328145266	-1.77377	0.262944162436548	41.2628	219.934	54.6689
sp|Q62261-2|SPTB2_MOUSE	Sptbn1	sp|Q62261-2|SPTB2_MOUSE;sp|Q62261|SPTB2_MOUSE	sp|Q62261-2|SPTB2_MOUSE;sp|Q62261|SPTB2_MOUSE	Isoform 2 of Spectrin beta chain, non-erythrocytic 1 OS=Mus musculus OX=10090 GN=Sptbn1;Spectrin beta chain, non-erythrocytic 1 OS=Mus musculus OX=10090 GN=Sptbn1 PE=1 SV=2	2	3	2.8	251.15	2154	0.0011876	15.501	0//0	1//0	0//1	24621000	128	3			-1;-1	192350		192350			32629000		SPL_6027		SPL_6027		1.91357e+07														0	3.08587	0
sp|Q62276-2|MED22_MOUSE	Med22	sp|Q62276-2|MED22_MOUSE;sp|Q62276|MED22_MOUSE	sp|Q62276-2|MED22_MOUSE;sp|Q62276|MED22_MOUSE	Isoform 2 of Mediator of RNA polymerase II transcription subunit 22 OS=Mus musculus OX=10090 GN=Med22;Mediator of RNA polymerase II transcription subunit 22 OS=Mus musculus OX=10090 GN=Med22 PE=1 SV=2	2	4	40.7	16.435	140	0	37.277	0//0	1//0	1//0	92946000	8	12			-1;-1	11618000		9271400	2346900		96081000	15682000	SPL_6027	SPL_21358			5.48545e+07	9.19206e+06					-2.61514	0.151445086705202					-2.57715	0.164467005076142	0	148.741	20.1604
sp|Q62318|TIF1B_MOUSE	Trim28	sp|Q62318|TIF1B_MOUSE;sp|Q62318-2|TIF1B_MOUSE	sp|Q62318|TIF1B_MOUSE;sp|Q62318-2|TIF1B_MOUSE	Transcription intermediary factor 1-beta OS=Mus musculus OX=10090 GN=Trim28 PE=1 SV=3;Isoform 2 of Transcription intermediary factor 1-beta OS=Mus musculus OX=10090 GN=Trim28	2	10	18.6	88.846	834	0	165.75	1//0	1//0	1//0	190840000	29	34			-1;-1	6580800	230450	4105800	2244600	65502000	93648000	79287000				1.75632e+07	5.20063e+07	3.18694e+07	0.515709	0.547858942065491	0.275545	0.536376604850214	-0.240164	0.536416184971098	1.56613	0.701388888888889	0.859616	0.667963683527886	-0.706516	0.463959390862944	7.67476	65.8694	19.2816
sp|Q62348|TSN_MOUSE	Tsn	sp|Q62348|TSN_MOUSE	sp|Q62348|TSN_MOUSE	Translin OS=Mus musculus OX=10090 GN=Tsn PE=1 SV=1	1	4	25.9	26.201	228	0	66.646	1//0	1//0	1//0	199130000	12	24			-1	16594000	2778400	1570600	12245000	143200000	44570000	116750000				8.76181e+07	1.46484e+07	7.19421e+07	-1.68389	0.133501259445844	-0.294609	0.339514978601997	1.38928	0.871676300578035	-2.58048	0.0949074074074074	-0.284392	0.352788586251621	2.29609	0.923857868020305	92.53	25.1972	105.187
sp|Q62351|TFR1_MOUSE	Tfrc	sp|Q62351|TFR1_MOUSE	sp|Q62351|TFR1_MOUSE	Transferrin receptor protein 1 OS=Mus musculus OX=10090 GN=Tfrc PE=1 SV=1	1	7	12.6	85.73	763	0	146.3	1//0	1//0	1//0	77614000	38	16			-1	2042500		1844400	198100		85772000	6829100				0	4.16446e+07	3.68553e+06					-3.65074	0.092485549132948					-3.49819	0.0822335025380711	0	29.5897	1.70172
sp|Q62376-2|RU17_MOUSE	Snrnp70	sp|Q62376-2|RU17_MOUSE;sp|Q62376|RU17_MOUSE	sp|Q62376-2|RU17_MOUSE;sp|Q62376|RU17_MOUSE	Isoform 2 of U1 small nuclear ribonucleoprotein 70 kDa OS=Mus musculus OX=10090 GN=Snrnp70;U1 small nuclear ribonucleoprotein 70 kDa OS=Mus musculus OX=10090 GN=Snrnp70 PE=1 SV=2	2	2	15.1	19.79	166	0.0021505	11.568	0//0	1//0	0//0	8866100	11	0			-1;-1	806010		806010			12141000		SPL_6027		SPL_6027		6.89084e+06														0	12.9308	0
sp|Q62419|SH3G1_MOUSE	Sh3gl1	sp|Q62419|SH3G1_MOUSE;sp|Q62420|SH3G2_MOUSE	sp|Q62419|SH3G1_MOUSE	Endophilin-A2 OS=Mus musculus OX=10090 GN=Sh3gl1 PE=1 SV=1	2	9	37.8	41.518	368	0	129.68	1//0	1//0	1//0	323910000	20	30			-1;-1	16195000	2093800	5321300	8780300	187390000	127810000	164000000				7.24788e+07	7.98321e+07	6.5619e+07	-0.552043	0.318639798488665	-0.192348	0.37660485021398	0.359695	0.669364161849711	0.13941	0.450231481481481	-0.143445	0.385214007782101	-0.282855	0.561421319796954	69.7306	85.3697	75.4246
sp|Q62425|NDUA4_MOUSE	Ndufa4	sp|Q62425|NDUA4_MOUSE	sp|Q62425|NDUA4_MOUSE	Cytochrome c oxidase subunit NDUFA4 OS=Mus musculus OX=10090 GN=Ndufa4 PE=1 SV=2	1	11	81.7	9.3267	82	0	209.47	1//0	1//0	1//0	5336700000	6	97			-1	889450000	39896000	486710000	362850000	1170200000	3360600000	2162800000				5.90259e+08	1.69558e+09	9.3879e+08	1.52196	0.711586901763224	0.886145	0.756062767475036	-0.635819	0.439306358381503	1.52236	0.69212962962963	0.669455	0.623865110246433	-0.852904	0.436548223350254	1328.67	7808.3	3116.96
sp|Q62452|UD19_MOUSE	Ugt1a9	sp|Q62452|UD19_MOUSE;sp|Q6ZQM8|UD17_MOUSE;sp|Q64435|UD16_MOUSE;sp|P70691|UD12_MOUSE;sp|Q63886|UD11_MOUSE	sp|Q62452|UD19_MOUSE;sp|Q6ZQM8|UD17_MOUSE;sp|Q64435|UD16_MOUSE;sp|P70691|UD12_MOUSE;sp|Q63886|UD11_MOUSE	UDP-glucuronosyltransferase 1A9 OS=Mus musculus OX=10090 GN=Ugt1a9 PE=1 SV=3;UDP-glucuronosyltransferase 1A7 OS=Mus musculus OX=10090 GN=Ugt1a7 PE=1 SV=1;UDP-glucuronosyltransferase 1-6 OS=Mus musculus OX=10090 GN=Ugt1a6 PE=1 SV=1;UDP-glucuronosyltransfera	5	2	5.5	60.007	528	0	36.814	0//0	1//0	0//0	1829800	24	2			-1;-1;-1;-1;-1	76240		76240			1829800		SPL_6027		SPL_6027		1.42214e+06														0	1.22312	0
sp|Q62465|VAT1_MOUSE	Vat1	sp|Q62465|VAT1_MOUSE	sp|Q62465|VAT1_MOUSE	Synaptic vesicle membrane protein VAT-1 homolog OS=Mus musculus OX=10090 GN=Vat1 PE=1 SV=3	1	8	30.5	43.096	406	0	58.413	1//0	1//0	0//0	60171000	15	10			-1	4011400	395390	3616000			68445000			SPL_M	SPL_6027	1.55863e+07	3.00502e+07								0.947095	0.587962962962963					13.1678	58.0116	0
sp|Q62523|ZYX_MOUSE	Zyx	sp|Q62523|ZYX_MOUSE	sp|Q62523|ZYX_MOUSE	Zyxin OS=Mus musculus OX=10090 GN=Zyx PE=1 SV=2	1	2	7.1	60.545	564	0	20.201	1//0	1//0	0//0	2914700	18	2			-1	161930	48242	113690			2046400			SPL_M	SPL_6027	2.28204e+06	1.59049e+06								-0.520853	0.331018518518519					1.60662	1.82393	0
sp|Q63829|COMD3_MOUSE	Commd3	sp|Q63829|COMD3_MOUSE	sp|Q63829|COMD3_MOUSE	COMM domain-containing protein 3 OS=Mus musculus OX=10090 GN=Commd3 PE=1 SV=1	1	12	64.6	22.037	195	0	323.31	1//0	1//0	1//0	1496600000	10	79			-1	149660000	7248200	63283000	79125000	434970000	769590000	628080000				1.4148e+08	2.16912e+08	2.30319e+08	0.823174	0.619647355163728	0.530032	0.633380884450785	-0.293142	0.526011560693642	0.616509	0.517361111111111	0.703035	0.634241245136187	0.0865264	0.643654822335025	241.389	1015.25	679.7
sp|Q63836|SBP2_MOUSE	Selenbp2	sp|Q63836|SBP2_MOUSE;sp|P17563|SBP1_MOUSE	sp|Q63836|SBP2_MOUSE;sp|P17563|SBP1_MOUSE	Selenium-binding protein 2 OS=Mus musculus OX=10090 GN=Selenbp2 PE=1 SV=2;Methanethiol oxidase OS=Mus musculus OX=10090 GN=Selenbp1 PE=1 SV=2	2	2	4.2	52.609	472	0.0026219	10.427	0//0	1//0	0//0	7117600	31	0			-1;-1	229600		229600			9711700		SPL_6027		SPL_6027		5.53189e+06														0	3.68348	0
sp|Q63850|NUP62_MOUSE	Nup62	sp|Q63850|NUP62_MOUSE	sp|Q63850|NUP62_MOUSE	Nuclear pore glycoprotein p62 OS=Mus musculus OX=10090 GN=Nup62 PE=1 SV=2	1	3	8.6	53.254	526	0	29.174	0//0	1//0	0//0	33995000	10	9			-1	3399500		3399500			43352000		SPL_6027		SPL_6027		2.64213e+07														0	54.5382	0
sp|Q64012-2|RALY_MOUSE	Raly	sp|Q64012-2|RALY_MOUSE;sp|Q64012|RALY_MOUSE	sp|Q64012-2|RALY_MOUSE;sp|Q64012|RALY_MOUSE	Isoform 1 of RNA-binding protein Raly OS=Mus musculus OX=10090 GN=Raly;RNA-binding protein Raly OS=Mus musculus OX=10090 GN=Raly PE=1 SV=3	2	7	27.7	31.198	296	0	45.798	1//0	1//0	1//0	145120000	17	21			-1;-1	8536600	4317000	401960	3817600	213120000	91852000	94801000				1.46683e+08	5.31093e+06	3.17743e+07	-1.21428	0.188916876574307	-1.16869	0.168330955777461	0.0455911	0.595375722543353	-4.7876	0.0104166666666667	-2.20677	0.0881971465629053	2.58083	0.94010152284264	143.771	6.44865	32.794
sp|Q64105|SPRE_MOUSE	Spr	sp|Q64105|SPRE_MOUSE	sp|Q64105|SPRE_MOUSE	Sepiapterin reductase OS=Mus musculus OX=10090 GN=Spr PE=1 SV=1	1	3	16.9	27.883	261	0	24.611	0//0	0//0	1//0	70607000	14	1			-1	5043300			5043300			60184000		SPL_21358	SPL_21358			3.45686e+07													0	0	43.323
sp|Q64213-2|SF01_MOUSE	Sf1	sp|Q64213-2|SF01_MOUSE;sp|Q64213-3|SF01_MOUSE;sp|Q64213|SF01_MOUSE	sp|Q64213-2|SF01_MOUSE;sp|Q64213-3|SF01_MOUSE;sp|Q64213|SF01_MOUSE	Isoform CW17E of Splicing factor 1 OS=Mus musculus OX=10090 GN=Sf1;Isoform 3 of Splicing factor 1 OS=Mus musculus OX=10090 GN=Sf1;Splicing factor 1 OS=Mus musculus OX=10090 GN=Sf1 PE=1 SV=6	3	3	6.6	59.656	548	0	22.776	1//0	1//0	1//0	84768000	14	7			-1;-1;-1	6054800	486390	1025200	4543300	29890000	18956000	52712000				1.7895e+07	1.11547e+07	3.11416e+07	-0.657008	0.292191435768262	0.818469	0.728958630527817	1.47548	0.891329479768786	-0.681904	0.303240740740741	0.799286	0.656290531776913	1.48119	0.857868020304569	16.1984	16.4473	39.0279
sp|Q64253|LY6E_MOUSE	Ly6e	sp|Q64253|LY6E_MOUSE	sp|Q64253|LY6E_MOUSE	Lymphocyte antigen 6E OS=Mus musculus OX=10090 GN=Ly6e PE=1 SV=3	1	2	27.9	14.392	136	0	157.52	0//0	1//0	0//0	151560000	5	6			-1	30312000		30312000			192210000		SPL_6027		SPL_6027		1.17794e+08														0	486.296	0
sp|Q64261|CDK6_MOUSE	Cdk6	sp|Q64261|CDK6_MOUSE	sp|Q64261|CDK6_MOUSE	Cyclin-dependent kinase 6 OS=Mus musculus OX=10090 GN=Cdk6 PE=1 SV=2	1	4	19.3	37.028	326	0	23.905	0//0	1//0	1//0	88718000	19	7			-1	4669400			4669400			75177000	SPL_6027	SPL_21358			0	3.91358e+07													0	0	40.1111
sp|Q64362|AKTIP_MOUSE	Aktip	sp|Q64362|AKTIP_MOUSE	sp|Q64362|AKTIP_MOUSE	AKT-interacting protein OS=Mus musculus OX=10090 GN=Aktip PE=1 SV=1	1	4	21.9	32.941	292	0	40.644	0//0	1//0	1//0	99476000	13	13			-1	7652000		7019900	632120		107000000	16715000	SPL_6027	SPL_21358			6.12167e+07	4.0233e+06					-2.6784	0.147976878612717					-3.92748	0.0578680203045685	0	112.62	5.43004
sp|Q64373-2|B2CL1_MOUSE	Bcl2l1	sp|Q64373-2|B2CL1_MOUSE;sp|Q64373-3|B2CL1_MOUSE;sp|Q64373-4|B2CL1_MOUSE;sp|Q64373|B2CL1_MOUSE	sp|Q64373-2|B2CL1_MOUSE;sp|Q64373-3|B2CL1_MOUSE;sp|Q64373-4|B2CL1_MOUSE;sp|Q64373|B2CL1_MOUSE	Isoform Bcl-X(S) of Bcl-2-like protein 1 OS=Mus musculus OX=10090 GN=Bcl2l1;Isoform Bcl-X(beta) of Bcl-2-like protein 1 OS=Mus musculus OX=10090 GN=Bcl2l1;Isoform Bcl-X(delta-TM) of Bcl-2-like protein 1 OS=Mus musculus OX=10090 GN=Bcl2l1;Bcl-2-like protein	4	2	11.2	18.961	170	0.0011862	15.432	0//0	1//0	0//0	26314000	6	4			-1;-1;-1;-1	4385700		4385700			33553000		SPL_6027		SPL_6027		2.04517e+07														0	70.3599	0
sp|Q64471|GSTT1_MOUSE	Gstt1	sp|Q64471|GSTT1_MOUSE	sp|Q64471|GSTT1_MOUSE	Glutathione S-transferase theta-1 OS=Mus musculus OX=10090 GN=Gstt1 PE=1 SV=4	1	2	8.8	27.374	240	0.0011468	13.868	0//0	1//0	0//0	10728000	11	1			-1	975320		975320			13327000		SPL_6027		SPL_6027		8.33832e+06														0	15.6471	0
sp|Q64518-1|AT2A3_MOUSE	Atp2a3	sp|Q64518-1|AT2A3_MOUSE;sp|Q64518|AT2A3_MOUSE;sp|Q64518-3|AT2A3_MOUSE	sp|Q64518-1|AT2A3_MOUSE;sp|Q64518|AT2A3_MOUSE;sp|Q64518-3|AT2A3_MOUSE	Isoform SERCA3B of Sarcoplasmic/endoplasmic reticulum calcium ATPase 3 OS=Mus musculus OX=10090 GN=Atp2a3;Sarcoplasmic/endoplasmic reticulum calcium ATPase 3 OS=Mus musculus OX=10090 GN=Atp2a3 PE=1 SV=4;Isoform SERCA3C of Sarcoplasmic/endoplasmic reticulum	3	45	44.8	113.64	1038	0	323.31	1//0	1//0	1//0	3161400000	48	148			-1;-1;-1	65863000	77319	64834000	951690	10194000	4064300000	17024000				9.7534e+06	5.52921e+08	2.23652e+07	8.63914	0.998740554156171	0.73985	0.704707560627675	-7.89929	0.0023121387283237	5.82502	0.988425925925926	1.19728	0.743190661478599	-4.62774	0.0385786802030457	2.57498	1040.13	8.17521
sp|Q64521|GPDM_MOUSE	Gpd2	sp|Q64521|GPDM_MOUSE	sp|Q64521|GPDM_MOUSE	Glycerol-3-phosphate dehydrogenase, mitochondrial OS=Mus musculus OX=10090 GN=Gpd2 PE=1 SV=2	1	27	55.4	80.953	727	0	316.62	1//0	1//0	1//0	1017300000	43	98			-1	23659000	1140000	12699000	9819700	341940000	559200000	388810000				6.73153e+07	1.41243e+08	1.17556e+08	0.709621	0.595717884130982	0.185322	0.490727532097004	-0.524299	0.469364161849711	1.06917	0.613425925925926	0.804345	0.657587548638132	-0.264824	0.56751269035533	37.9658	203.73	84.3533
sp|Q64523|H2A2C_MOUSE	H2ac20	sp|Q64523|H2A2C_MOUSE;sp|Q6GSS7|H2A2A_MOUSE	sp|Q64523|H2A2C_MOUSE;sp|Q6GSS7|H2A2A_MOUSE	Histone H2A type 2-C OS=Mus musculus OX=10090 GN=H2ac20 PE=1 SV=3;Histone H2A type 2-A OS=Mus musculus OX=10090 GN=Hist2h2aa1 PE=1 SV=3	2	3	62	13.988	129	0	130.78	0//1	1//0	1//0	782360000	5	13			-1;-1	156470000		148310000	8164400		1062900000	46656000	SPL_6027	SPL_21358			5.76328e+08	1.99863e+07					-4.5098	0.0439306358381503					-4.84981	0.0294416243654822	0	2379.34	70.1339
[truncated: 1,047 more rows]
