# Supplementary material for: Differential Affinity Chromatography Coupled to Mass Spectrometry: A Suitable Tool to Identify Common Binding Proteins of a Broad-Range Antimicrobial Peptide Derived from Leucinostatin
Source: Biomedicines. 2022 Oct 23;10(11):2675. doi: 10.3390/biomedicines10112675 (PMC9687860; doi:10.3390/biomedicines10112675)
Supplement: Supplementary file 1 [file biomedicines-10-02675-s001.zip › TableS3.xlsx]

## Sheet: Table S3
GN	Annotation	Number of proteins	Razor + unique peptides	Sequence coverage [%]	Mol. weight [kDa]	iBAQ	LFQ S2_6027	Top3 S2_6027	rAbu S2_6027	rAbu(x10e3)	rAbu (% of total)
TGRH88_008910	Sec61beta family protein	1	6	57.6	10.103	87285000	503830000	9.27083e+07	33180.1	33.1801	8.98828
TGRH88_013490	Dense granule protein GRA12	1	26	64	47.912	59851000	1155600000	8.70038e+07	22751.5	22.7515	6.16323
TGRH88_067710	Eukaryotic porin protein	1	23	77.6	31.352	52591000	863010000	7.09728e+07	19991.7	19.9917	5.41563
TGRH88_002590	Unspecified product	1	19	60.5	29.568	38014000	587050000	4.58121e+07	14450.5	14.4505	3.91454
TGRH88_000580	Unspecified product	1	7	58.5	17.913	30725000	201940000	2.52073e+07	11679.7	11.6797	3.16395
TGRH88_067940	14-3-3 protein	1	23	65.9	37.173	29756000	599100000	3.81514e+07	11311.3	11.3113	3.06416
TGRH88_061860	Unspecified product	1	6	47.3	19.246	19804000	191210000	3.40224e+07	7528.2	7.5282	2.03934
TGRH88_004320	Zinc finger CDGSH-type domain-containing protein	1	5	54.2	13.162	18245000	105610000	1.54835e+07	6935.57	6.93557	1.8788
TGRH88_006890	Putative ubiquinol cytochrome c oxidoreductase	1	16	37.4	54.792	17961000	443780000	4.25309e+07	6827.61	6.82761	1.84956
TGRH88_018120	Unspecified product	1	9	49.1	25.833	17304000	183570000	2.35193e+07	6577.87	6.57787	1.7819
TGRH88_074430	Unspecified product	1	13	48.9	34.955	17201000	282110000	3.92359e+07	6538.71	6.53871	1.77129
TGRH88_067370	Unspecified product	1	9	44.1	15.488	17130000	148630000	2.02459e+07	6511.72	6.51172	1.76398
TGRH88_081780	putative calmodulin	1	5	71.3	9.7801	16412000	78634000	1.3207e+07	6238.78	6.23878	1.69005
TGRH88_040180	Facilitative glucose transporter GT1	1	11	16	61.687	15657000	257440000	3.00829e+07	5951.78	5.95178	1.6123
TGRH88_051090	Chaperonin protein BiP	1	31	49	73.252	15530000	465300000	2.86556e+07	5903.5	5.9035	1.59922
TGRH88_003600	Dense granule protein GRA8	1	7	24.7	28.527	15294000	128910000	1.88086e+07	5813.79	5.81379	1.57492
TGRH88_050010	Putative cytochrome C oxidase subunit IIb	1	5	52.4	21.228	13590000	104870000	1.72905e+07	5166.04	5.16604	1.39945
TGRH88_022800	ribosomal protein RPS17	1	8	55.3	15.228	12807000	74213000	1.18473e+07	4868.4	4.8684	1.31882
TGRH88_012110	unspecified product	1	4	33.1	13.491	12161000	70544000	1.10536e+07	4622.83	4.62283	1.25229
TGRH88_068380	Cg8 family protein	1	8	39.2	23.76	12051000	127630000	1.65803e+07	4581.01	4.58101	1.24097
TGRH88_072250	myosin light chain MLC1	1	7	55.9	24.124	11978000	103970000	1.19368e+07	4553.26	4.55326	1.23345
TGRH88_077450	SAG-related sequence SRS29B	1	16	62.5	34.829	11892000	230130000	1.70437e+07	4520.57	4.52057	1.22459
TGRH88_016820	Putative calmodulin	1	8	64.7	15.277	11813000	113040000	1.0869e+07	4490.54	4.49054	1.21646
TGRH88_007360	YOU2 family C2C2 zinc finger protein	1	9	63.8	17.125	11069000	105270000	1.48598e+07	4207.72	4.20772	1.13984
TGRH88_080370	SAG-related sequence SRS34A	1	6	36.6	18.981	10164000	107880000	1.54065e+07	3863.7	3.8637	1.04665
TGRH88_067080	Unspecified product	1	10	46.8	24.547	9781000	160730000	1.96795e+07	3718.11	3.71811	1.00721
TGRH88_005920	ribosomal protein RPS10	1	4	33.6	17.398	8931000	77704000	1.49036e+07	3394.99	3.39499	0.919681
TGRH88_041400	Putative peptidase M16 family protein	1	14	45.8	56.915	8380700	218590000	2.26255e+07	3185.8	3.1858	0.863013
TGRH88_024580	ribosomal protein RPS15	1	3	26.7	17.157	8289200	48079000	9.44084e+06	3151.02	3.15102	0.853591
TGRH88_074190	Putative calcium binding protein precursor	1	17	59.7	38.277	8095500	132800000	1.17878e+07	3077.39	3.07739	0.833644
TGRH88_058240	Acid phosphatase GAP50	1	14	47.3	46.606	8001600	185820000	2.14444e+07	3041.69	3.04169	0.823975
TGRH88_008430	TB2/DP1, HVA22 family protein	1	3	19	19.036	7990600	46435000	9.10061e+06	3037.51	3.03751	0.822842
TGRH88_043730	putative GAP45	1	8	46.1	27.318	7890900	92011000	1.5707e+07	2999.61	2.99961	0.812575
TGRH88_013580	ubiquinol-cytochrome c reductase	1	7	43.2	26.741	7724200	96759000	1.48122e+07	2936.24	2.93624	0.795409
TGRH88_025670	unspecified product	1	4	21.1	25.436	7576500	72997000	1.25823e+07	2880.1	2.8801	0.7802
TGRH88_021450	unspecified product	1	4	19.3	23.416	7477100	50368000	8.7139e+06	2842.31	2.84231	0.769964
TGRH88_074780	peroxiredoxin PRX3	1	9	32.9	30.463	6895300	100000000	1.33271e+07	2621.15	2.62115	0.710052
TGRH88_011750	ribosomal protein RPSA	1	11	56.1	31.512	6607900	76533000	8.03173e+06	2511.9	2.5119	0.680457
TGRH88_083200	unspecified product	1	3	33.9	20.245	6394000	49206000	9.70957e+06	2430.59	2.43059	0.65843
TGRH88_028550	putative prohibitin	1	12	63.8	30.221	6131300	88799000	9.98684e+06	2330.72	2.33072	0.631378
TGRH88_038860	Rhoptry protein ROP2 (RH)	2	9	31.5	43.078	5699200	104320000	1.12613e+07	2166.47	2.16647	0.586882
TGRH88_044770	ribosomal protein RPS18	1	6	44.9	17.722	5687800	49519000	6.99514e+06	2162.13	2.16213	0.585708
TGRH88_047230	unspecified product	1	6	56.6	14.374	5424500	36678000	5.8967e+06	2062.05	2.06205	0.558595
TGRH88_029380	membrane protein	1	4	19.4	24.515	5332800	72092000	1.37267e+07	2027.19	2.02719	0.549152
TGRH88_046190	putative cytochrome C oxidase subunit IIa	1	4	15.7	34.488	5176000	79929000	1.53692e+07	1967.58	1.96758	0.533005
TGRH88_034260	Rhoptry protein ROP18	1	12	31.2	62.342	5154900	148180000	2.33798e+07	1959.56	1.95956	0.530832
TGRH88_057300	signal peptidase subunit protein	1	6	39.4	19.514	5136200	24834000	3.55566e+06	1952.45	1.95245	0.528907
TGRH88_039670	MIC2-associated protein M2AP	1	7	39.7	34.573	5123500	46200000	6.81192e+06	1947.62	1.94762	0.527599
TGRH88_050720	putative DnaJ family chaperone	1	14	50.7	47.448	4706100	77336000	8.59072e+06	1788.96	1.78896	0.484617
TGRH88_043050	ribosomal protein RPS19	1	5	22.6	27.567	4652900	53917000	9.21746e+06	1768.73	1.76873	0.479138
TGRH88_064730	histone H2Bb	2	2	33.9	12.575	4573500	31155000	6.07698e+06	1738.55	1.73855	0.470962
TGRH88_036350	Putative peptidase M16, alpha subunit	1	12	28.4	62.161	4373800	109140000	9.87501e+06	1662.64	1.66264	0.450398
TGRH88_054460	unspecified product	1	2	23.4	15.971	4293000	20667000	4.07454e+06	1631.92	1.63192	0.442077
TGRH88_021840	Unspecified product	1	15	8.4	234.45	4217100	407180000	3.94433e+07	1603.07	1.60307	0.434261
TGRH88_067960	unspecified product	1	5	56.4	14.407	4192000	32546000	5.47847e+06	1593.53	1.59353	0.431677
TGRH88_037060	unspecified product	1	3	28.9	15.269	4059300	27432000	5.39371e+06	1543.08	1.54308	0.418012
TGRH88_053810	putative atp synthase F1, epsilon subunit	1	2	30.1	8.4786	3861200	18495000	3.66465e+06	1467.78	1.46778	0.397612
TGRH88_072660	NAC domain-containing protein	1	5	42.1	20.316	3805300	33262000	5.08424e+06	1446.53	1.44653	0.391856
TGRH88_068890	ATP synthase beta subunit ATP-B	1	16	42.9	59.916	3751500	108680000	9.93667e+06	1426.08	1.42608	0.386315
TGRH88_060850	unspecified product	1	9	36.6	42.82	3724900	71781000	9.24964e+06	1415.97	1.41597	0.383576
TGRH88_020190	rhoptry protein ROP7	2	8	36.5	63.394	3709600	85971000	1.07377e+07	1410.15	1.41015	0.382001
TGRH88_054760	putative integral membrane protein, DUF56 family protein	1	3	28.7	18.101	3699300	25046000	4.91533e+06	1406.24	1.40624	0.38094
TGRH88_000140	putative transmembrane protein	2	8	29	47.738	3692200	78497000	9.53163e+06	1403.54	1.40354	0.380209
TGRH88_049300	ribosomal protein RPP2	1	2	39.8	11.768	3533800	16998000	3.35389e+06	1343.32	1.34332	0.363898
TGRH88_060800	cytochrome c1, heme protein	1	9	28.6	45.968	3282200	60104000	6.5442e+06	1247.68	1.24768	0.337989
TGRH88_041990	Myosin A	1	28	41.4	93.333	3269100	145070000	9.69915e+06	1242.7	1.2427	0.33664
TGRH88_063660	putative mitochondria-associated granulocyte macrophage CSF signaling molecule	1	4	44.9	14.639	3250200	21999000	3.81253e+06	1235.52	1.23552	0.334693
TGRH88_034710	putative ATPase synthase subunit alpha	1	12	21.6	61.111	3171000	98016000	1.24993e+07	1205.41	1.20541	0.326538
TGRH88_008890	unspecified product	1	2	44.3	11.577	3134600	9065400	1.78506e+06	1191.57	1.19157	0.322789
TGRH88_077070	SPFH domain / Band 7 family protein	1	7	27.9	32.061	3058700	47019000	5.34914e+06	1162.72	1.16272	0.314974
TGRH88_071930	putative myosin heavy chain	1	6	36.1	23.334	3006200	31934000	4.515e+06	1142.76	1.14276	0.309567
TGRH88_002330	putative myosin light chain 2	1	11	42.5	40.542	2927300	53715000	6.29915e+06	1112.77	1.11277	0.301442
TGRH88_005290	unspecified product	1	3	38.2	15.081	2825300	21845000	4.29039e+06	1074	1.074	0.290939
TGRH88_082400	enolase 2	2	11	38.9	52.113	2775400	53423000	6.48291e+06	1055.03	1.05503	0.2858
TGRH88_045660	putative ATP synthase	1	4	35	19.457	2736600	29130000	5.40117e+06	1040.28	1.04028	0.281805
TGRH88_057710	rhoptry protein ROP5	1	8	56.3	60.591	2652600	56415000	6.53057e+06	1008.35	1.00835	0.273155
TGRH88_039000	unspecified product	1	4	39.6	13.042	2645300	17890000	3.13398e+06	1005.57	1.00557	0.272403
TGRH88_076910	heat shock protein	1	5	31.8	21.035	2536700	26954000	4.19217e+06	964.29	0.96429	0.26122
TGRH88_063650	putative adenine nucleotide translocator	1	8	26.1	35.255	2437300	49106000	5.35132e+06	926.504	0.926504	0.250984
TGRH88_018100	unspecified product	1	4	18.2	31.412	2419000	32768000	6.54714e+06	919.548	0.919548	0.2491
TGRH88_019820	putative elongation factor 1-alpha (EF-1-ALPHA)	2	11	42.2	49.005	2401900	59505000	5.87099e+06	913.048	0.913048	0.247339
TGRH88_043750	ubiquitin interaction motif family protein	1	9	37.6	41.377	2371700	41209000	4.6775e+06	901.567	0.901567	0.244229
TGRH88_077950	unspecified product	1	3	45.3	9.7939	2355100	9095900	1.7882e+06	895.257	0.895257	0.242519
TGRH88_049530	putative cyclase-associated protein	1	6	39	21.759	2226000	32281000	4.48142e+06	846.182	0.846182	0.229225
TGRH88_045360	putative membrane protein	1	4	37.5	14.904	2211700	16826000	3.02974e+06	840.746	0.840746	0.227753
TGRH88_013230	tryptophanyl-tRNA synthetase (TrpRS2)	1	17	41.7	67.817	2055300	65594000	3.92339e+06	781.293	0.781293	0.211647
TGRH88_039680	unspecified product	1	4	47.8	15.147	1962300	17108000	2.92007e+06	745.94	0.74594	0.20207
TGRH88_017040	putative vacuolar atp synthase subunit e	1	7	27.2	39.129	1946400	35749000	5.7374e+06	739.896	0.739896	0.200433
TGRH88_074880	unspecified product	1	7	38.2	39.498	1916600	31355000	3.94108e+06	728.568	0.728568	0.197364
TGRH88_057840	putative vacuolar ATP synthase subunit b	1	13	45.1	56.614	1900900	47734000	3.36464e+06	722.6	0.7226	0.195748
TGRH88_057220	putative elongation factor 1-gamma	1	8	29.2	44.039	1891600	32932000	3.98527e+06	719.064	0.719064	0.19479
TGRH88_031240	dense granule protein GRA14	1	7	28.4	44.753	1889700	31057000	4.399e+06	718.342	0.718342	0.194594
TGRH88_077080	putative IMP dehydrogenase	1	10	26.1	59.046	1863500	48546000	5.58565e+06	708.383	0.708383	0.191896
TGRH88_024410	unspecified product	1	7	28.1	35.227	1816500	19384000	2.30338e+06	690.516	0.690516	0.187056
TGRH88_045340	putative mitochondrial inner membrane translocase subunit TIM17	1	2	10.9	24.692	1789100	10377000	2.03765e+06	680.1	0.6801	0.184235
TGRH88_077110	putative deoxyuridine 5-triphosphate nucleotidohydrolase	1	4	29.4	18.19	1756100	13647000	2.42711e+06	667.556	0.667556	0.180837
TGRH88_000070	unspecified product	1	5	15.6	51.171	1755200	28907000	4.61981e+06	667.214	0.667214	0.180744
TGRH88_069840	putative COPI associated protein	1	2	13.7	29.924	1682500	12021000	2.87433e+06	639.578	0.639578	0.173258
TGRH88_062210	GTP-binding nuclear protein ran/tc4	1	7	39.3	25.997	1671000	22543000	3.0256e+06	635.206	0.635206	0.172073
TGRH88_061450	thioredoxin domain-containing protein	1	3	15.1	33.676	1530100	11845000	2.32352e+06	581.645	0.581645	0.157564
TGRH88_018740	unspecified product	1	5	19.5	44.583	1517400	21987000	3.61383e+06	576.818	0.576818	0.156256
TGRH88_064360	putative eukaryotic initiation factor-3, subunit 3	1	7	16.2	65.657	1510900	33692000	4.95741e+06	574.347	0.574347	0.155587
TGRH88_001760	unspecified product	1	5	35.6	27.46	1500500	24598000	3.93397e+06	570.393	0.570393	0.154516
TGRH88_045970	EF-1 guanine nucleotide exchange domain-containing protein	1	4	24.4	36.029	1495500	24443000	4.8259e+06	568.493	0.568493	0.154001
TGRH88_033530	unspecified product	1	4	26.1	22.522	1491600	15909000	3.0496e+06	567.01	0.56701	0.153599
TGRH88_027910	putative heat shock protein 90	1	14	22	97.553	1490800	67766000	6.25628e+06	566.706	0.566706	0.153517
TGRH88_051410	unspecified product	1	2	16.1	22.26	1409700	12210000	2.40835e+06	535.877	0.535877	0.145166
TGRH88_038870	rhoptry protein ROP8	1	3	12.9	65.407	1393700	37703000	7.40737e+06	529.795	0.529795	0.143518
TGRH88_029860	cAMP-dependent protein kinase regulatory subunit	1	6	21.3	42.796	1379100	29237000	4.89021e+06	524.245	0.524245	0.142015
TGRH88_070180	unspecified product	1	3	17.8	17.94	1335900	14206000	2.78943e+06	507.823	0.507823	0.137566
TGRH88_031730	ribosomal protein RPS7	1	5	41.8	22.587	1327700	14111000	2.21957e+06	504.706	0.504706	0.136722
TGRH88_026860	ATP synthase F1, delta subunit protein	1	6	29	27.635	1287900	19875000	2.91188e+06	489.577	0.489577	0.132623
TGRH88_014870	NAD/NADP octopine/nopaline dehydrogenase, alpha-helical domain-containing protein	1	11	44.4	48.072	1276200	24636000	2.6294e+06	485.129	0.485129	0.131418
TGRH88_008000	unspecified product	1	3	19.6	24.27	1258600	9722500	1.91118e+06	478.439	0.478439	0.129606
TGRH88_039180	unspecified product	1	4	18.9	27.554	1237800	17953000	3.15517e+06	470.532	0.470532	0.127464
TGRH88_013340	FAD Malate-dehydrogenase (MDH-FAD)	1	6	11.8	60.336	1188700	26358000	4.49964e+06	451.867	0.451867	0.122408
TGRH88_018990	profilin PRF	1	2	20.2	17.555	1174400	9057300	1.78346e+06	446.431	0.446431	0.120935
TGRH88_074750	unspecified product	1	11	12.1	139.08	1171600	69304000	7.22865e+06	445.367	0.445367	0.120647
TGRH88_042550	unspecified product	1	5	18.4	38.654	1158400	17924000	2.69356e+06	440.349	0.440349	0.119288
TGRH88_007550	microneme protein MIC3	1	6	25.3	40.528	1118700	20575000	2.85366e+06	425.258	0.425258	0.1152
TGRH88_024520	SAG-related sequence SRS25	1	2	21.5	20.782	1101600	4295600	836455	418.757	0.418757	0.113439
TGRH88_019670	translation initiation factor 3 subunit	1	4	26.7	31.812	1100300	8138400	1.78831e+06	418.263	0.418263	0.113305
TGRH88_057140	putative syntaxin 6	1	2	11.8	26.962	1065900	13537000	2.63035e+06	405.186	0.405186	0.109762
TGRH88_067730	unspecified product	1	3	22.1	24.896	1031100	5946900	1.17436e+06	391.958	0.391958	0.106179
TGRH88_039230	putative TIM10 family protein	1	2	34.2	8.0721	1011300	4888600	959818	384.431	0.384431	0.10414
TGRH88_064100	SAC3/GANP family protein	1	3	11.2	41.072	1002400	11624000	2.28338e+06	381.048	0.381048	0.103223
TGRH88_039020	flavoprotein subunit of succinate dehydrogenase	1	6	13.6	72.733	998970	35773000	5.86746e+06	379.744	0.379744	0.10287
TGRH88_029740	ribosomal protein RPS5	1	4	29.2	21.613	986080	10491000	1.80446e+06	374.844	0.374844	0.101543
TGRH88_052360	eukaryotic initiation factor-2, alpha subunit	1	5	21.6	39.126	957920	18435000	2.87033e+06	364.139	0.364139	0.098643
TGRH88_040220	DJ-1 family protein	1	3	15.6	27.904	934740	10824000	2.12916e+06	355.328	0.355328	0.096256
TGRH88_008360	MSP (Major sperm protein) domain-containing protein	1	3	25.1	25.975	933730	9052100	1.77241e+06	354.944	0.354944	0.096152
TGRH88_077980	2-oxoglutarate/malate translocase OMT	1	6	31.9	35.071	920730	17803000	2.40367e+06	350.002	0.350002	0.0948133
TGRH88_038120	unspecified product	1	4	19.7	35.195	885550	11963000	2.27642e+06	336.629	0.336629	0.0911906
TGRH88_076800	ribosomal protein RPS3A	1	4	23.6	29.371	871220	12650000	2.22882e+06	331.182	0.331182	0.089715
TGRH88_081010	unspecified product	1	2	9.5	28.19	869240	13418000	2.63998e+06	330.429	0.330429	0.0895111
TGRH88_068800	SAC3/GANP family protein	1	4	22.7	29.693	864170	10820000	1.94983e+06	328.502	0.328502	0.088989
TGRH88_011050	beta-tubulin	3	5	15.6	50.073	850520	15614000	2.55902e+06	323.313	0.323313	0.0875834
TGRH88_045270	phosphatidylserine decarboxylase	1	2	4.9	48.394	826120	19923000	3.92031e+06	314.038	0.314038	0.0850708
TGRH88_064880	putative phosphate carrier	1	5	12.5	53.093	813240	20399000	3.21149e+06	309.141	0.309141	0.0837444
TGRH88_081490	proteasome regulatory subunit	1	3	13.7	35.261	807080	11696000	2.298e+06	306.8	0.3068	0.0831101
TGRH88_041950	putative eukaryotic initiation factor-2 beta	1	4	25.1	26.233	784590	11346000	1.93755e+06	298.251	0.298251	0.0807942
TGRH88_047540	putative eukaryotic initiation factor-3, subunit 5	1	2	9.5	38.069	771690	14047000	2.78315e+06	293.347	0.293347	0.0794658
TGRH88_054990	unspecified product	1	2	24.4	10.033	764240	3705600	725329	290.515	0.290515	0.0786986
TGRH88_064560	putative seryl-tRNA synthetase, cytoplasmic	1	7	20.7	54.146	758240	21975000	3.10352e+06	288.234	0.288234	0.0780807
TGRH88_036510	GAPM1a	1	2	16.1	33.534	753370	4270600	858037	286.383	0.286383	0.0775792
TGRH88_063000	putative protein disulfide isomerase-related protein (provisional)	1	4	10.1	59.88	749530	18893000	3.4255e+06	284.923	0.284923	0.0771838
TGRH88_000170	unspecified product	3	2	10.9	48.408	746940	12960000	2.55212e+06	283.938	0.283938	0.0769171
TGRH88_050260	emp24/gp25L/p24 family protein	1	5	14.7	74.76	742390	21531000	3.92159e+06	282.209	0.282209	0.0764486
TGRH88_014590	putative eukaryotic initiation factor-3, delta subunit	1	4	18.2	37.766	725970	13273000	2.25954e+06	275.967	0.275967	0.0747577
TGRH88_065840	unspecified product	1	2	27.8	10.041	723520	2785700	549355	275.036	0.275036	0.0745054
TGRH88_032270	putative 26s proteasome regulatory complex subunit	1	3	14.4	47.563	702890	16973000	3.33557e+06	267.193	0.267193	0.072381
TGRH88_074270	ribosomal protein RPS23	1	2	21.7	15.801	696170	4657100	925026	264.639	0.264639	0.071689
TGRH88_006730	Rab11b	2	3	15.5	24.857	657890	10720000	2.12298e+06	250.087	0.250087	0.0677471
TGRH88_060120	microneme protein MIC8	1	6	14.6	74.533	655250	17730000	2.26092e+06	249.084	0.249084	0.0674752
TGRH88_060830	putative vacuolar ATP synthase subunit g	1	2	33.6	14.837	640900	3691800	729930	243.629	0.243629	0.0659975
TGRH88_070240	unspecified product	1	2	21	19.535	632330	3666000	720164	240.371	0.240371	0.065115
TGRH88_010730	ribosomal protein RPL32	1	2	12.9	19.602	628070	5467500	1.07297e+06	238.752	0.238752	0.0646763
TGRH88_007130	transporter, major facilitator family protein	1	3	13.6	62.981	622650	9611100	1.89105e+06	236.691	0.236691	0.0641182
TGRH88_003920	ribosomal protein RPL12	1	2	16.4	17.821	620890	5422800	1.06073e+06	236.022	0.236022	0.0639369
TGRH88_083150	unspecified product	1	2	14.8	18.815	600180	5991800	1.13926e+06	228.15	0.22815	0.0618043
TGRH88_076470	lactate dehydrogenase LDH1	1	7	29.2	35.548	585740	12451000	2.04475e+06	222.661	0.222661	0.0603173
TGRH88_058560	unspecified product	1	3	16.3	35.253	538490	8830000	1.73767e+06	204.699	0.204699	0.0554517
TGRH88_052560	proteasome 26S regulatory subunit	1	11	16.1	117.68	534320	32162000	3.34236e+06	203.114	0.203114	0.0550223
TGRH88_030540	putative chaperonin cpn60	1	7	17.7	72.223	516480	15957000	2.43639e+06	196.332	0.196332	0.0531852
TGRH88_047840	unspecified product	1	4	20.4	34.744	504180	9227300	1.43029e+06	191.657	0.191657	0.0519186
TGRH88_049140	nmda receptor glutamate-binding chain	1	2	11.3	29.275	501770	4874800	952453	190.741	0.190741	0.0516704
TGRH88_060070	ribosomal protein RPS8	1	3	20	23.462	481990	4629200	914899	183.222	0.183222	0.0496335
TGRH88_063870	centrin 2	1	2	28.8	19.153	474830	4614900	901325	180.5	0.1805	0.0488962
TGRH88_002660	dense granule protein DG32	1	3	26	24.153	471190	5021200	983857	179.116	0.179116	0.0485214
TGRH88_055140	alpha tubulin TUBA1	1	5	19	50.113	452680	9158500	1.5591e+06	172.08	0.17208	0.0466153
TGRH88_062260	ribosomal protein RPL26	1	2	16.3	16.309	439590	2968600	584104	167.104	0.167104	0.0452673
TGRH88_021020	dynamin-related protein DRPB	1	10	17	95.93	435710	18946000	1.9179e+06	165.629	0.165629	0.0448678
TGRH88_082010	Mov34/MPN/PAD-1 family protein	1	3	11.4	38.438	434570	7197700	1.40233e+06	165.195	0.165195	0.0447504
TGRH88_080990	ribosomal protein RPS13	1	2	19.2	17.176	426110	3739900	727960	161.98	0.16198	0.0438792
TGRH88_063390	putative apolipoprotein A-I binding protein	1	2	14.8	25.892	419630	4451700	876192	159.516	0.159516	0.0432119
TGRH88_079070	unspecified product	1	3	19	28.036	412550	5095000	1.01803e+06	156.825	0.156825	0.0424829
TGRH88_047320	putative splicing factor 3A subunit 2	1	2	14	27.858	408110	6697900	1.31696e+06	155.137	0.155137	0.0420256
TGRH88_033960	NAC domain-containing protein	1	3	21.7	20.507	404720	4334600	845052	153.848	0.153848	0.0416766
TGRH88_046560	phosphofructokinase PFKII	1	8	10.1	143.17	386590	19490000	2.18074e+06	146.957	0.146957	0.0398096
TGRH88_040700	unspecified product	1	2	11.2	28.504	384120	4449100	874965	146.018	0.146018	0.0395552
TGRH88_071680	putative DnaJ protein	1	4	15.9	44.619	376200	8358400	1.64244e+06	143.007	0.143007	0.0387397
TGRH88_062920	bifunctional dihydrofolate reductase-thymidylate synthase	1	5	13.4	68.751	370090	11424000	1.52667e+06	140.684	0.140684	0.0381105
TGRH88_058460	EF-1 guanine nucleotide exchange domain-containing protein	1	2	17.6	20.734	360590	2098500	410683	137.073	0.137073	0.0371322
TGRH88_059070	putative eukaryotic porin	1	2	6	50.512	359690	6903700	1.3655e+06	136.731	0.136731	0.0370395
TGRH88_050160	phosphorylase family protein	1	3	14.5	33.043	358580	6284800	1.22518e+06	136.309	0.136309	0.0369252
TGRH88_044550	putative adenylate kinase	1	3	16	28.56	355470	5846700	1.14708e+06	135.127	0.135127	0.036605
TGRH88_003260	CTP synthase	1	4	9	70.941	351120	10205000	1.90085e+06	133.473	0.133473	0.036157
TGRH88_071320	unspecified product	1	2	13.2	16.684	326040	2825200	556997	123.939	0.123939	0.0335744
TGRH88_034190	ribosomal protein RPS12	1	2	28.2	15.399	325590	2774600	556227	123.768	0.123768	0.033528
TGRH88_067900	putative citrate synthase	1	6	13.3	69.404	305820	8633400	1.15315e+06	116.253	0.116253	0.0314922
TGRH88_008770	rhoptry protein ROP15	1	2	10.2	36.589	305130	5628800	1.10044e+06	115.991	0.115991	0.0314212
TGRH88_023030	pyridine nucleotide-disulfide oxidoreductase domain-containing protein	1	2	4.1	68.886	300910	9610300	1.8849e+06	114.387	0.114387	0.0309866
TGRH88_060080	mitotic checkpoint protein, BUB3 family protein	1	3	12.7	36.574	299050	4898800	965006	113.68	0.11368	0.0307951
TGRH88_002370	T-complex protein 1 eta subunit	1	4	10.3	59.463	295600	8255100	1.62722e+06	112.368	0.112368	0.0304398
TGRH88_083160	hypoxanthine-xanthine-guanine phosphoribosyl transferase HXGPRT	1	2	8.6	31.485	295230	3686800	728531	112.227	0.112227	0.0304017
TGRH88_022870	PCI domain-containing protein	1	6	20	55.519	292840	5932700	1.00585e+06	111.319	0.111319	0.0301556
TGRH88_069400	putative 26s proteasome subunit p55	1	3	10.1	55.049	290620	8419800	1.65498e+06	110.475	0.110475	0.029927
TGRH88_078500	PCI domain-containing protein	1	3	8.1	66.707	287610	9724600	1.91077e+06	109.331	0.109331	0.029617
TGRH88_041240	lysine decarboxylase family protein	1	3	11.8	43.956	284820	5746700	1.13535e+06	108.27	0.10827	0.0293297
TGRH88_034040	putative translation elongation factor 2 family protein	1	5	8.5	93.088	284480	12056000	1.86254e+06	108.141	0.108141	0.0292947
TGRH88_035550	unspecified product	1	2	31.9	13.22	283960	2271700	431218	107.943	0.107943	0.0292411
TGRH88_021070	unspecified product	1	2	9.7	40.688	282940	5703900	1.12787e+06	107.556	0.107556	0.0291361
TGRH88_068940	microneme protein MIC7	1	3	14.1	36.34	279730	4586900	902681	106.335	0.106335	0.0288056
TGRH88_051360	apicoplast-associated thioredoxin family protein Atrx1	1	5	10.4	86.905	276160	10487000	1.63068e+06	104.978	0.104978	0.0284379
TGRH88_010700	DnaJ domain-containing protein	1	2	8.7	48.936	272130	6078700	1.18807e+06	103.446	0.103446	0.0280229
TGRH88_068000	ribosomal protein RPS16	1	3	17.1	24.001	266900	3288000	658625	101.458	0.101458	0.0274844
TGRH88_082430	unspecified product	1	5	7.5	70.039	266650	8008100	1.22714e+06	101.363	0.101363	0.0274586
TGRH88_014200	unspecified product	1	2	9.7	38.567	264110	4867100	952533	100.398	0.100398	0.0271971
TGRH88_043860	putative thioredoxin	1	4	10.5	68.947	263420	8918600	1.50958e+06	100.135	0.100135	0.027126
TGRH88_017560	glutathione s-transferase, n-terminal domain containing protein	1	2	6.6	37.831	262010	5333700	1.04441e+06	99.5993	0.0995993	0.0269808
TGRH88_032660	signal peptidase	1	2	13.9	24.664	261680	2770800	546385	99.4739	0.0994739	0.0269468
TGRH88_072780	putative vacuolar ATP synthase subunit A	1	3	7.6	68.147	259020	8256500	1.62251e+06	98.4627	0.0984627	0.0266729
TGRH88_078580	eukaryotic translation initiation factor 3 subunit 6 interacting protein	1	6	14.2	75.073	254860	8842800	1.49203e+06	96.8813	0.0968813	0.0262445
TGRH88_057610	Gpi16 subunit, GPI transamidase component protein	1	5	11.2	83.546	248570	6957500	1.00468e+06	94.4903	0.0944903	0.0255968
TGRH88_000180	unspecified product	1	2	29.2	48.137	243730	5659800	1.11034e+06	92.6504	0.0926504	0.0250984
TGRH88_025480	heat shock protein HSP28	1	4	21.7	31.035	241560	4477000	792939	91.8255	0.0918255	0.0248749
TGRH88_057070	26S proteasome regulatory subunit, S6a family AAA ATpase	1	2	9.1	47.787	231630	5141600	1.01126e+06	88.0508	0.0880508	0.0238524
TGRH88_007610	unspecified product	1	2	9.9	29.923	230650	3319100	656744	87.6783	0.0876783	0.0237515
TGRH88_039150	ribosomal protein RPS24	1	2	10.5	30.375	218220	3167300	621325	82.9532	0.0829532	0.0224715
TGRH88_025560	redoxin domain-containing protein	1	2	14.7	31.121	217920	2540900	496377	82.8391	0.0828391	0.0224406
TGRH88_047270	PCI domain-containing protein	1	2	4.3	55.682	216040	4800800	943194	82.1245	0.0821245	0.022247
TGRH88_054180	SAG-related sequence SRS52A	1	2	11.2	37.24	212500	3674800	726073	80.7788	0.0807788	0.0218825
TGRH88_055940	S15 sporozoite-expressed protein	1	2	5.6	50.24	209510	4278300	835168	79.6422	0.0796422	0.0215746
TGRH88_046580	unspecified product	1	2	14.1	25.324	203820	2375200	464259	77.4792	0.0774792	0.0209886
TGRH88_057700	rhoptry protein ROP5	2	2	34.8	60.953	202770	4719600	923773	77.0801	0.0770801	0.0208805
TGRH88_067980	Proteasome/cyclosome repeat-containing protein	1	7	8	125.58	201280	10905000	1.49533e+06	76.5137	0.0765137	0.0207271
TGRH88_033800	cyclophilin precursor	1	2	7.5	38.193	179920	3656100	717184	68.394	0.068394	0.0185275
TGRH88_065740	putative proteasome subunit alpha type 1	1	2	12.6	27.242	170570	2489300	485654	64.8397	0.0648397	0.0175647
TGRH88_041610	putative eukaryotic initiation factor-2 gamma	1	2	9.2	50.508	170090	3840900	742597	64.6573	0.0646573	0.0175152
TGRH88_051520	rhoptry protein ROP13	1	2	8.8	44.729	165080	2864700	564044	62.7528	0.0627528	0.0169993
TGRH88_014770	putative proteasome subunit beta type 1	1	2	11.4	39.899	159230	2293900	453383	60.529	0.060529	0.0163969
TGRH88_061590	fructose-bisphospatase II	1	3	12.3	42.397	157060	3243000	626080	59.7041	0.0597041	0.0161735
TGRH88_076180	DnaJ domain-containing protein	1	2	3.7	96.156	152880	5032700	986626	58.1151	0.0581151	0.015743
TGRH88_021570	unspecified product	1	2	8.4	50.2	152470	3530600	694616	57.9593	0.0579593	0.0157008
TGRH88_066140	putative 26S proteasome regulatory subunit 7	1	4	12.2	52.394	139900	3205000	690465	53.181	0.053181	0.0144064
TGRH88_060750	surp module domain-containing protein	1	3	9.4	71.701	136510	3160400	621874	51.8923	0.0518923	0.0140573
TGRH88_063150	glutamate/leucine/phenylalanine/valine dehydrogenase family protein	1	5	8	135.5	134010	7217200	1.14092e+06	50.942	0.050942	0.0137999
TGRH88_048350	phenylalanine--tRNA ligase, beta subunit protein	1	4	8.6	74.556	133140	4474400	884538	50.6112	0.0506112	0.0137103
TGRH88_010940	putative 26S protease regulatory subunit 4	1	3	12.2	49.134	131110	3411700	671937	49.8396	0.0498396	0.0135012
TGRH88_034070	CCT chaperonin gamma subunit	1	4	9.4	60.697	116280	4007000	794598	44.2022	0.0442022	0.0119741
TGRH88_016040	PCI domain-containing protein	1	2	5	61.638	114190	3968900	780333	43.4077	0.0434077	0.0117589
TGRH88_074790	sarco/endoplasmic reticulum Ca2+-ATPase	1	4	4.7	128.68	112000	5701800	950601	42.5752	0.0425752	0.0115333
TGRH88_075660	unspecified product	1	3	7.5	64.671	111700	3771600	742120	42.4611	0.0424611	0.0115024
TGRH88_047560	26S proteasome regulatory subunit	1	4	18.8	44.425	111560	2489200	429207	42.4079	0.0424079	0.011488
TGRH88_049410	unspecified product	1	2	2.3	333.81	111350	14704000	2.87454e+06	42.3281	0.0423281	0.0114664
TGRH88_048920	putative peroxiredoxin 6	1	3	7.2	44.088	110470	2371900	461312	41.9936	0.0419936	0.0113758
TGRH88_064630	heat shock protein	1	3	5.5	78.254	103470	4079300	805258	39.3326	0.0393326	0.010655
TGRH88_060290	pyruvate dehydrogenase complex subunit PDH-E1Alpha	1	3	7.7	67.487	100530	2534600	496134	38.215	0.038215	0.0103522
TGRH88_078830	cell division protein CDC48CY	1	2	3.9	89.96	98914	3912800	769794	37.6007	0.0376007	0.0101858
TGRH88_075460	unspecified product	1	2	3.8	77.043	96621	2149000	421835	36.7291	0.0367291	0.00994967
TGRH88_078930	T-complex protein 1 delta subunit	1	2	6.6	58.674	96208	3362600	657433	36.5721	0.0365721	0.00990714
TGRH88_017180	ribosomal protein RPS2	1	2	10	29.336	91157	1343600	259551	34.652	0.034652	0.00938701
TGRH88_039120	transporter, major facilitator family protein	1	2	4.7	58.166	90774	1414700	275689	34.5064	0.0345064	0.00934757
TGRH88_047240	unspecified product	1	2	19.2	20.378	88876	925240	185573	33.7849	0.0337849	0.00915212
TGRH88_049500	putative membrane protein	1	2	5.3	89.885	87603	2812600	548748	33.301	0.033301	0.00902103
TGRH88_047800	unspecified product	1	2	9.1	43.249	85815	1654000	325786	32.6213	0.0326213	0.00883691
TGRH88_008150	putative TCP-1 chaperonin	1	2	5.6	72.113	83516	2751800	538997	31.7474	0.0317474	0.00860017
TGRH88_021940	non-proton pumping type-II NADH dehydrogenase I	1	2	6.1	67.039	80550	2638900	519859	30.6199	0.0306199	0.00829474
TGRH88_037280	putative eukaryotic initiation factor-3 subunit 10	1	2	1.9	119.14	70219	3704600	719756	26.6927	0.0266927	0.00723089
TGRH88_012030	hexokinase	1	2	4.9	51.467	64793	1571000	307471	24.6301	0.0246301	0.00667214
TGRH88_004880	putative asparagine synthetase	1	2	5.3	65.868	59514	1639000	316313	22.6234	0.0226234	0.00612853
TGRH88_042710	putative serine hydroxymethyltransferase 2	1	2	5.2	65.246	56741	1258200	247721	21.5693	0.0215693	0.00584298
TGRH88_082060	glyceraldehyde-3-phosphate dehydrogenase GAPDH2	1	2	3.2	105.13	54315	2186900	433023	20.6471	0.0206471	0.00559316
TGRH88_042430	putative phenylalanyl-tRNA synthetase alpha chain A	1	2	4	67.178	54279	1539600	309098	20.6334	0.0206334	0.00558945
TGRH88_080960	asparaginyl-tRNA synthetase (NOB+tRNA synthase)	1	3	5.5	74.918	48706	1985000	388301	18.5149	0.0185149	0.00501556
TGRH88_000540	unspecified product	1	2	4.6	67.179	47341	1585700	305533	17.996	0.017996	0.004875
TGRH88_015680	Sec23/Sec24 trunk domain-containing protein	1	2	4.6	87.595	37180	1152600	225837	14.1334	0.0141334	0.00382866
TGRH88_055700	guanine nucleotide-binding protein	1	3	14.6	35.147	22332	403250	80542.1	8.48919	0.00848919	0.00229967
TGRH88_033760	unspecified product	1	2	2.7	140.82	10272	451970	85792.5	3.90475	0.00390475	0.00105777
										369.149
