# Supplementary material for: Differential Affinity Chromatography Coupled to Mass Spectrometry: A Suitable Tool to Identify Common Binding Proteins of a Broad-Range Antimicrobial Peptide Derived from Leucinostatin
Source: Biomedicines. 2022 Oct 23;10(11):2675. doi: 10.3390/biomedicines10112675 (PMC9687860; doi:10.3390/biomedicines10112675)
Supplement: Supplementary file 1 [file biomedicines-10-02675-s001.zip › TableS4.xlsx]

## Sheet: Table S4
Leading_Protein	GN	Protein IDs	Majority protein IDs	Fasta headers	Number of proteins	Razor + unique peptides	Sequence coverage [%]	Mol. weight [kDa]	Sequence length	Q-value	Score	Num Ident byMSMS//byMatch SPL_M	Num Ident byMSMS//byMatch SPL_6027	Num Ident byMSMS//byMatch SPL_21358	Intensity	iBAQ peptides	MS/MS count	Only identified by site	Potential contaminant	Taxonomy IDs	iBAQ	iBAQ SPL_6027	LFQ SPL_6027	Top3 SPL_6027	rAbu SPL_6027	rAbu (% of total)
sp|Q9CQP3|CHCH5_MOUSE	Chchd5	sp|Q9CQP3|CHCH5_MOUSE	sp|Q9CQP3|CHCH5_MOUSE	Coiled-coil-helix-coiled-coil-helix domain-containing protein 5 OS=Mus musculus OX=10090 GN=Chchd5 PE=1 SV=1	1	5	71.8	12.326	110	0	105.33	0//0	1//0	0//0	482580000	6	17			-1	80430000	80430000	619560000	3.27387e+08	1290.34	2.05669
sp|Q9D958|SPCS1_MOUSE	Spcs1	sp|Q9D958|SPCS1_MOUSE	sp|Q9D958|SPCS1_MOUSE	Signal peptidase complex subunit 1 OS=Mus musculus OX=10090 GN=Spcs1 PE=2 SV=3	1	2	8.1	18.186	161	0.00062228	18.293	0//0	1//0	0//0	383640000	5	7			-1	76728000	76728000	507120000	2.98171e+08	1230.95	1.96202
sp|O08547|SC22B_MOUSE	Sec22b	sp|O08547|SC22B_MOUSE	sp|O08547|SC22B_MOUSE	Vesicle-trafficking protein SEC22b OS=Mus musculus OX=10090 GN=Sec22b PE=1 SV=3	1	14	70.7	24.74	215	0	261.5	0//0	1//0	0//0	887420000	12	44			-1	73952000	73952000	1173500000	3.4243e+08	1186.41	1.89104
sp|Q8R5J9|PRAF3_MOUSE	Arl6ip5	sp|Q8R5J9|PRAF3_MOUSE	sp|Q8R5J9|PRAF3_MOUSE	PRA1 family protein 3 OS=Mus musculus OX=10090 GN=Arl6ip5 PE=1 SV=2	1	9	26.6	21.557	188	0	264.48	0//0	1//0	0//0	434700000	6	36			-1	72450000	72450000	548710000	2.68275e+08	1162.32	1.85263
sp|P17665|COX7C_MOUSE	Cox7c	sp|P17665|COX7C_MOUSE	sp|P17665|COX7C_MOUSE	Cytochrome c oxidase subunit 7C, mitochondrial OS=Mus musculus OX=10090 GN=Cox7c PE=1 SV=1	1	4	50.8	7.3325	63	0	101.2	0//0	1//0	0//0	356140000	5	10			-1	71227000	71227000	480910000	2.65744e+08	1142.7	1.82136
sp|P35459|LY6D_MOUSE	Ly6d	sp|P35459|LY6D_MOUSE	sp|P35459|LY6D_MOUSE	Lymphocyte antigen 6D OS=Mus musculus OX=10090 GN=Ly6d PE=1 SV=1	1	4	48.8	13.395	127	0	146.84	0//0	1//0	0//0	284610000	4	18			-1	71152000	71152000	365470000	1.80486e+08	1141.49	1.81944
sp|Q08857|CD36_MOUSE	Cd36	sp|Q08857|CD36_MOUSE	sp|Q08857|CD36_MOUSE	Platelet glycoprotein 4 OS=Mus musculus OX=10090 GN=Cd36 PE=1 SV=2	1	15	36.4	52.697	472	0	210.53	0//0	1//0	0//0	1074900000	16	40			-1	67179000	67179000	1375800000	4.15312e+08	1077.75	1.71784
sp|Q9D8V7|SC11C_MOUSE	Sec11c	sp|Q9D8V7|SC11C_MOUSE	sp|Q9D8V7|SC11C_MOUSE	Signal peptidase complex catalytic subunit SEC11C OS=Mus musculus OX=10090 GN=Sec11c PE=1 SV=3	1	10	35.4	21.66	192	0	128.77	0//0	1//0	0//0	637840000	10	28			-1	63784000	63784000	811820000	3.00348e+08	1023.29	1.63103
sp|P20491|FCERG_MOUSE	Fcer1g	sp|P20491|FCERG_MOUSE	sp|P20491|FCERG_MOUSE	High affinity immunoglobulin epsilon receptor subunit gamma OS=Mus musculus OX=10090 GN=Fcer1g PE=1 SV=1	1	4	32.6	9.6523	86	0	30.911	0//0	1//0	0//0	125210000	2	10			-1	62603000	62603000	160730000	8.33308e+07	1004.34	1.60083
sp|Q8BXV2|BRI3B_MOUSE	Bri3bp	sp|Q8BXV2|BRI3B_MOUSE	sp|Q8BXV2|BRI3B_MOUSE	BRI3-binding protein OS=Mus musculus OX=10090 GN=Bri3bp PE=1 SV=1	1	3	11.9	28.263	253	0	20.053	0//0	1//0	0//0	471090000	8	8			-1	58886000	58886000	608170000	3.66137e+08	944.709	1.50578
sp|P19437|CD20_MOUSE	Ms4a1	sp|P19437|CD20_MOUSE	sp|P19437|CD20_MOUSE	B-lymphocyte antigen CD20 OS=Mus musculus OX=10090 GN=Ms4a1 PE=1 SV=1	1	10	55.7	31.958	291	0	240.73	0//0	1//0	0//0	466260000	8	30			-1	58283000	58283000	614040000	2.13797e+08	935.035	1.49036
sp|P97370|AT1B3_MOUSE	Atp1b3	sp|P97370|AT1B3_MOUSE	sp|P97370|AT1B3_MOUSE	Sodium/potassium-transporting ATPase subunit beta-3 OS=Mus musculus OX=10090 GN=Atp1b3 PE=1 SV=1	1	13	53.6	31.775	278	0	151.47	0//0	1//0	0//0	678320000	12	37			-1	56527000	56527000	869480000	3.43073e+08	906.864	1.44546
sp|Q9DCF9-2|SSRG_MOUSE	Ssr3	sp|Q9DCF9-2|SSRG_MOUSE;sp|Q9DCF9|SSRG_MOUSE	sp|Q9DCF9-2|SSRG_MOUSE;sp|Q9DCF9|SSRG_MOUSE	Isoform 2 of Translocon-associated protein subunit gamma OS=Mus musculus OX=10090 GN=Ssr3;Translocon-associated protein subunit gamma OS=Mus musculus OX=10090 GN=Ssr3 PE=1 SV=1	2	2	10.1	20.699	179	0	257.09	0//0	1//0	0//0	260330000	5	13			-1;-1	52065000	52065000	325900000	2.02329e+08	835.28	1.33136
sp|P61166|TM258_MOUSE	Tmem258	sp|P61166|TM258_MOUSE	sp|P61166|TM258_MOUSE	Transmembrane protein 258 OS=Mus musculus OX=10090 GN=Tmem258 PE=1 SV=1	1	2	57	9.0788	79	0.0011689	14.636	0//0	1//0	0//0	102390000	2	4			-1	51194000	51194000	134550000	7.95772e+07	821.306	1.30909
sp|Q9JKW0|AR6P1_MOUSE	Arl6ip1	sp|Q9JKW0|AR6P1_MOUSE	sp|Q9JKW0|AR6P1_MOUSE	ADP-ribosylation factor-like protein 6-interacting protein 1 OS=Mus musculus OX=10090 GN=Arl6ip1 PE=1 SV=1	1	4	12.8	23.437	203	0	37.588	0//0	1//0	0//0	204710000	4	6			-1	51177000	51177000	262080000	1.44812e+08	821.034	1.30865
sp|Q9R0P6|SC11A_MOUSE	Sec11a	sp|Q9R0P6|SC11A_MOUSE	sp|Q9R0P6|SC11A_MOUSE	Signal peptidase complex catalytic subunit SEC11A OS=Mus musculus OX=10090 GN=Sec11a PE=1 SV=1	1	8	32.4	20.626	179	0	143.72	0//0	1//0	0//0	510640000	10	33			-1	51064000	51064000	582510000	2.64085e+08	819.221	1.30576
sp|P54116|STOM_MOUSE	Stom	sp|P54116|STOM_MOUSE	sp|P54116|STOM_MOUSE	Stomatin OS=Mus musculus OX=10090 GN=Stom PE=1 SV=3	1	13	56	31.375	284	0	222.46	0//0	1//0	0//0	635760000	15	32			-1	42384000	42384000	813980000	3.37454e+08	679.967	1.08381
sp|Q9D3P8|PLRKT_MOUSE	Plgrkt	sp|Q9D3P8|PLRKT_MOUSE	sp|Q9D3P8|PLRKT_MOUSE	Plasminogen receptor (KT) OS=Mus musculus OX=10090 GN=Plgrkt PE=1 SV=1	1	5	27.9	17.261	147	0	63.991	0//0	1//0	0//0	337060000	9	12			-1	37451000	37451000	435450000	2.45649e+08	600.827	0.957665
sp|Q9R0Q3|TMED2_MOUSE	Tmed2	sp|Q9R0Q3|TMED2_MOUSE	sp|Q9R0Q3|TMED2_MOUSE	Transmembrane emp24 domain-containing protein 2 OS=Mus musculus OX=10090 GN=Tmed2 PE=1 SV=1	1	6	50.2	22.705	201	0	75.607	0//0	1//0	0//0	336820000	9	22			-1	37425000	37425000	446980000	2.11121e+08	600.41	0.957
sp|P46638|RB11B_MOUSE	Rab11b	sp|P46638|RB11B_MOUSE;sp|P62492|RB11A_MOUSE;sp|Q9WTL2|RAB25_MOUSE	sp|P46638|RB11B_MOUSE;sp|P62492|RB11A_MOUSE	Ras-related protein Rab-11B OS=Mus musculus OX=10090 GN=Rab11b PE=1 SV=3;Ras-related protein Rab-11A OS=Mus musculus OX=10090 GN=Rab11a PE=1 SV=3	3	13	57.3	24.489	218	0	323.31	0//0	1//0	0//0	535800000	15	28			-1;-1;-1	35720000	35720000	700930000	2.38854e+08	573.057	0.913401
sp|Q61462-2|CY24A_MOUSE	Cyba	sp|Q61462-2|CY24A_MOUSE;sp|Q61462|CY24A_MOUSE	sp|Q61462-2|CY24A_MOUSE;sp|Q61462|CY24A_MOUSE	Isoform 2 of Cytochrome b-245 light chain OS=Mus musculus OX=10090 GN=Cyba;Cytochrome b-245 light chain OS=Mus musculus OX=10090 GN=Cyba PE=1 SV=3	2	4	32.3	17.593	164	0	32.738	0//0	1//0	0//0	178450000	5	12			-1;-1	35690000	35690000	232180000	1.30894e+08	572.575	0.912634
sp|Q922Q8|LRC59_MOUSE	Lrrc59	sp|Q922Q8|LRC59_MOUSE	sp|Q922Q8|LRC59_MOUSE	Leucine-rich repeat-containing protein 59 OS=Mus musculus OX=10090 GN=Lrrc59 PE=1 SV=1	1	14	50.2	34.877	307	0	219.13	0//0	1//0	0//0	494950000	14	27			-1	35354000	35354000	627610000	2.08928e+08	567.185	0.904042
sp|Q9R233-2|TPSN_MOUSE	Tapbp	sp|Q9R233-2|TPSN_MOUSE;sp|Q9R233|TPSN_MOUSE	sp|Q9R233-2|TPSN_MOUSE;sp|Q9R233|TPSN_MOUSE	Isoform Short of Tapasin OS=Mus musculus OX=10090 GN=Tapbp;Tapasin OS=Mus musculus OX=10090 GN=Tapbp PE=1 SV=2	2	14	32.6	46.62	435	0	149.41	0//0	1//0	0//0	644150000	19	41			-1;-1	33903000	33903000	857290000	2.84441e+08	543.906	0.866939
sp|Q9CQQ7|AT5F1_MOUSE	Atp5pb	sp|Q9CQQ7|AT5F1_MOUSE	sp|Q9CQQ7|AT5F1_MOUSE	ATP synthase F(0) complex subunit B1, mitochondrial OS=Mus musculus OX=10090 GN=Atp5pb PE=1 SV=1	1	10	32.4	28.948	256	0	130.83	0//0	1//0	0//0	574850000	17	35			-1	33815000	33815000	746260000	2.3648e+08	542.495	0.864688
sp|P51150|RAB7A_MOUSE	Rab7a	sp|P51150|RAB7A_MOUSE	sp|P51150|RAB7A_MOUSE	Ras-related protein Rab-7a OS=Mus musculus OX=10090 GN=Rab7a PE=1 SV=2	1	17	79.7	23.489	207	0	257.43	0//0	1//0	0//0	464980000	14	32			-1	33213000	33213000	591400000	1.72104e+08	532.837	0.849294
sp|Q9CR20|IR3IP_MOUSE	Ier3ip1	sp|Q9CR20|IR3IP_MOUSE	sp|Q9CR20|IR3IP_MOUSE	Immediate early response 3-interacting protein 1 OS=Mus musculus OX=10090 GN=Ier3ip1 PE=3 SV=1	1	3	61	9.0167	82	0	102.22	0//0	1//0	0//0	127100000	4	10			-1	31775000	31775000	165730000	9.87822e+07	509.767	0.812523
sp|O70252|HMOX2_MOUSE	Hmox2	sp|O70252|HMOX2_MOUSE	sp|O70252|HMOX2_MOUSE	Heme oxygenase 2 OS=Mus musculus OX=10090 GN=Hmox2 PE=1 SV=1	1	18	64.1	35.738	315	0	303.86	0//0	1//0	0//0	552360000	18	44			-1	30687000	30687000	715330000	1.56015e+08	492.312	0.784702
sp|Q64253|LY6E_MOUSE	Ly6e	sp|Q64253|LY6E_MOUSE	sp|Q64253|LY6E_MOUSE	Lymphocyte antigen 6E OS=Mus musculus OX=10090 GN=Ly6e PE=1 SV=3	1	2	27.9	14.392	136	0	157.52	0//0	1//0	0//0	151560000	5	6			-1	30312000	30312000	192210000	1.17794e+08	486.296	0.775113
sp|P0DN34|NDUB1_MOUSE	Ndufb1	sp|P0DN34|NDUB1_MOUSE	sp|P0DN34|NDUB1_MOUSE	NADH dehydrogenase [ubiquinone] 1 beta subcomplex subunit 1 OS=Mus musculus OX=10090 GN=Ndufb1 PE=1 SV=1	1	2	75.4	6.954	57	0	37.382	0//0	1//0	0//0	89286000	3	11			-1	29762000	29762000	114140000	6.93939e+07	477.472	0.761048
sp|Q78XF5|OSTC_MOUSE	Ostc	sp|Q78XF5|OSTC_MOUSE	sp|Q78XF5|OSTC_MOUSE	Oligosaccharyltransferase complex subunit OSTC OS=Mus musculus OX=10090 GN=Ostc PE=1 SV=1	1	2	12.1	16.815	149	0	34.952	0//0	1//0	0//0	148220000	5	6			-1	29643000	29643000	192070000	1.15196e+08	475.563	0.758005
sp|A0A0B4J1G0|FCGR4_MOUSE	Fcgr4	sp|A0A0B4J1G0|FCGR4_MOUSE	sp|A0A0B4J1G0|FCGR4_MOUSE	Low affinity immunoglobulin gamma Fc region receptor IV OS=Mus musculus OX=10090 GN=Fcgr4 PE=1 SV=1	1	9	56.2	28.398	249	0	121.11	0//0	1//0	0//0	364750000	13	22			-1	28058000	28058000	474370000	1.75836e+08	450.135	0.717475
sp|O70131|NINJ1_MOUSE	Ninj1	sp|O70131|NINJ1_MOUSE	sp|O70131|NINJ1_MOUSE	Ninjurin-1 OS=Mus musculus OX=10090 GN=Ninj1 PE=1 SV=1	1	4	21.7	16.555	152	0	165.98	0//0	1//0	0//0	109290000	4	17			-1	27322000	27322000	142330000	7.71599e+07	438.327	0.698655
sp|P30355|AL5AP_MOUSE	Alox5ap	sp|P30355|AL5AP_MOUSE	sp|P30355|AL5AP_MOUSE	Arachidonate 5-lipoxygenase-activating protein OS=Mus musculus OX=10090 GN=Alox5ap PE=1 SV=2	1	3	34.8	18.136	161	0	18.415	0//0	1//0	0//0	136050000	5	7			-1	27209000	27209000	178310000	1.05736e+08	436.514	0.695765
sp|O35166|GOSR2_MOUSE	Gosr2	sp|O35166|GOSR2_MOUSE	sp|O35166|GOSR2_MOUSE	Golgi SNAP receptor complex member 2 OS=Mus musculus OX=10090 GN=Gosr2 PE=1 SV=2	1	7	42.9	24.725	212	0	92.182	0//0	1//0	0//0	182430000	7	26			-1	26062000	26062000	238580000	1.04027e+08	418.113	0.666435
sp|Q9CY50|SSRA_MOUSE	Ssr1	sp|Q9CY50|SSRA_MOUSE	sp|Q9CY50|SSRA_MOUSE	Translocon-associated protein subunit alpha OS=Mus musculus OX=10090 GN=Ssr1 PE=1 SV=1	1	5	30.8	32.065	286	0	106.98	0//0	1//0	0//0	225180000	9	15			-1	25020000	25020000	294870000	1.52881e+08	401.396	0.63979
sp|P20040|HB24_MOUSE		sp|P20040|HB24_MOUSE;sp|P18468|HB2I_MOUSE;sp|P04231|HB23_MOUSE;sp|P04230|HB21_MOUSE	sp|P20040|HB24_MOUSE;sp|P18468|HB2I_MOUSE;sp|P04231|HB23_MOUSE	H-2 class II histocompatibility antigen, E-Q beta chain OS=Mus musculus OX=10090 PE=1 SV=1;H-2 class II histocompatibility antigen, I-A beta chain OS=Mus musculus OX=10090 GN=H2-Eb1 PE=1 SV=1;H-2 class II histocompatibility antigen, E-S beta chain (Fragmen	4	9	39	30.204	264	0	107.48	0//0	1//0	0//0	347760000	14	28			-1;-1;-1;-1	24840000	24840000	441540000	1.45176e+08	398.509	0.635187
sp|Q60931|VDAC3_MOUSE	Vdac3	sp|Q60931|VDAC3_MOUSE	sp|Q60931|VDAC3_MOUSE	Voltage-dependent anion-selective channel protein 3 OS=Mus musculus OX=10090 GN=Vdac3 PE=1 SV=1	1	9	41	30.752	283	0	323.31	0//0	1//0	0//0	344190000	14	28			-1	24585000	24585000	431960000	1.60286e+08	394.418	0.628667
sp|Q9DCC8|TOM20_MOUSE	Tomm20	sp|Q9DCC8|TOM20_MOUSE	sp|Q9DCC8|TOM20_MOUSE	Mitochondrial import receptor subunit TOM20 homolog OS=Mus musculus OX=10090 GN=Tomm20 PE=1 SV=1	1	4	53.1	16.284	145	0	86.867	0//0	1//0	0//0	117540000	5	9			-1	23508000	23508000	142550000	8.57979e+07	377.139	0.601126
sp|Q07813|BAX_MOUSE	Bax	sp|Q07813|BAX_MOUSE	sp|Q07813|BAX_MOUSE	Apoptosis regulator BAX OS=Mus musculus OX=10090 GN=Bax PE=1 SV=1	1	4	24.5	21.394	192	0	134.69	0//0	1//0	0//0	185200000	8	11			-1	23150000	23150000	235770000	1.31214e+08	371.396	0.591972
sp|Q8BGH2|SAM50_MOUSE	Samm50	sp|Q8BGH2|SAM50_MOUSE	sp|Q8BGH2|SAM50_MOUSE	Sorting and assembly machinery component 50 homolog OS=Mus musculus OX=10090 GN=Samm50 PE=1 SV=1	1	18	49.7	51.863	469	0	191.3	0//0	1//0	0//0	574380000	25	42			-1	22975000	22975000	737820000	2.03513e+08	368.588	0.587497
sp|Q99KF1|TMED9_MOUSE	Tmed9	sp|Q99KF1|TMED9_MOUSE	sp|Q99KF1|TMED9_MOUSE	Transmembrane emp24 domain-containing protein 9 OS=Mus musculus OX=10090 GN=Tmed9 PE=1 SV=2	1	9	40	27.127	235	0	263.51	0//0	1//0	1//0	292670000	13	30			-1	22513000	22513000	383200000	1.48358e+08	361.176	0.575683
sp|P53994|RAB2A_MOUSE	Rab2a	sp|P53994|RAB2A_MOUSE;sp|P59279|RAB2B_MOUSE	sp|P53994|RAB2A_MOUSE	Ras-related protein Rab-2A OS=Mus musculus OX=10090 GN=Rab2a PE=1 SV=1	2	11	57.5	23.547	212	0	250.19	0//0	1//0	0//0	313040000	14	19			-1;-1	22360000	22360000	398940000	1.76521e+08	358.722	0.571771
sp|P50637|TSPO_MOUSE	Tspo	sp|P50637|TSPO_MOUSE	sp|P50637|TSPO_MOUSE	Translocator protein OS=Mus musculus OX=10090 GN=Tspo PE=1 SV=1	1	6	34.9	18.841	169	0	197.45	0//0	1//0	0//0	130220000	6	11			-1	21704000	21704000	175530000	7.73923e+07	348.198	0.554996
sp|P0CW03|LY6C2_MOUSE	Ly6c2	sp|P0CW03|LY6C2_MOUSE;sp|P0CW02|LY6C1_MOUSE	sp|P0CW03|LY6C2_MOUSE;sp|P0CW02|LY6C1_MOUSE	Lymphocyte antigen 6C2 OS=Mus musculus OX=10090 GN=Ly6c2 PE=1 SV=1;Lymphocyte antigen 6C1 OS=Mus musculus OX=10090 GN=Ly6c1 PE=2 SV=1	2	4	30.5	14.09	131	0	109.5	0//0	1//0	0//0	103840000	5	9			-1;-1	20767000	20767000	131810000	6.74576e+07	333.165	0.531036
sp|P58021|TM9S2_MOUSE	Tm9sf2	sp|P58021|TM9S2_MOUSE	sp|P58021|TM9S2_MOUSE	Transmembrane 9 superfamily member 2 OS=Mus musculus OX=10090 GN=Tm9sf2 PE=1 SV=1	1	10	17.5	75.329	662	0	118.08	0//0	1//0	0//0	340800000	17	28			-1	20047000	20047000	437220000	1.74682e+08	321.614	0.512625
sp|Q9CPQ8|ATP5L_MOUSE	Atp5mg	sp|Q9CPQ8|ATP5L_MOUSE	sp|Q9CPQ8|ATP5L_MOUSE	ATP synthase subunit g, mitochondrial OS=Mus musculus OX=10090 GN=Atp5mg PE=1 SV=1	1	5	70.9	11.424	103	0	81.159	0//0	1//0	0//0	96128000	5	14			-1	19226000	19226000	122230000	5.92635e+07	308.443	0.491631
sp|Q924Z4|CERS2_MOUSE	Cers2	sp|Q924Z4|CERS2_MOUSE	sp|Q924Z4|CERS2_MOUSE	Ceramide synthase 2 OS=Mus musculus OX=10090 GN=Cers2 PE=1 SV=1	1	8	23.9	45.024	380	0	76.239	0//0	1//0	0//0	287540000	15	19			-1	19169000	19169000	374640000	1.35633e+08	307.529	0.490173
sp|Q9WUQ2|PREB_MOUSE	Preb	sp|Q9WUQ2|PREB_MOUSE	sp|Q9WUQ2|PREB_MOUSE	Prolactin regulatory element-binding protein OS=Mus musculus OX=10090 GN=Preb PE=1 SV=1	1	11	37.2	45.437	417	0	206.72	0//0	1//0	0//0	362890000	19	32			-1	19100000	19100000	469280000	1.63829e+08	306.422	0.488409
sp|Q6ZQI3|MLEC_MOUSE	Mlec	sp|Q6ZQI3|MLEC_MOUSE	sp|Q6ZQI3|MLEC_MOUSE	Malectin OS=Mus musculus OX=10090 GN=Mlec PE=1 SV=2	1	11	43	32.342	291	0	103.8	0//0	1//0	0//0	295160000	16	18			-1	18447000	18447000	377830000	1.56636e+08	295.946	0.471711
sp|Q8K3J1|NDUS8_MOUSE	Ndufs8	sp|Q8K3J1|NDUS8_MOUSE	sp|Q8K3J1|NDUS8_MOUSE	NADH dehydrogenase [ubiquinone] iron-sulfur protein 8, mitochondrial OS=Mus musculus OX=10090 GN=Ndufs8 PE=1 SV=1	1	9	42.9	24.038	212	0	101.21	0//0	1//0	0//0	238410000	13	21			-1	18339000	18339000	307470000	1.05563e+08	294.213	0.468949
sp|P35762|CD81_MOUSE	Cd81	sp|P35762|CD81_MOUSE	sp|P35762|CD81_MOUSE	CD81 antigen OS=Mus musculus OX=10090 GN=Cd81 PE=1 SV=2	1	2	18.2	25.814	236	0	160.66	0//0	1//0	0//0	126310000	7	8			-1	18044000	18044000	159960000	9.8167e+07	289.48	0.461406
sp|Q9WVA2|TIM8A_MOUSE	Timm8a1	sp|Q9WVA2|TIM8A_MOUSE;sp|Q4FZG7|TI8AB_MOUSE	sp|Q9WVA2|TIM8A_MOUSE;sp|Q4FZG7|TI8AB_MOUSE	Mitochondrial import inner membrane translocase subunit Tim8 A OS=Mus musculus OX=10090 GN=Timm8a1 PE=1 SV=1;Putative mitochondrial import inner membrane translocase subunit Tim8 A-B OS=Mus musculus OX=10090 GN=Timm8a2 PE=3 SV=1	2	4	40.2	11.042	97	0	136.05	0//0	1//0	0//0	106920000	6	10			-1;-1	17819000	17819000	136930000	7.34388e+07	285.871	0.455652
sp|Q8VD31|TPSNR_MOUSE	Tapbpl	sp|Q8VD31|TPSNR_MOUSE	sp|Q8VD31|TPSNR_MOUSE	Tapasin-related protein OS=Mus musculus OX=10090 GN=Tapbpl PE=1 SV=2	1	8	25.5	48.732	451	0	71.99	0//0	1//0	0//0	370950000	21	15			-1	17664000	17664000	498160000	2.55725e+08	283.384	0.451689
sp|Q3THW5|H2AV_MOUSE	H2az2	sp|Q3THW5|H2AV_MOUSE;sp|P0C0S6|H2AZ_MOUSE	sp|Q3THW5|H2AV_MOUSE;sp|P0C0S6|H2AZ_MOUSE	Histone H2A.V OS=Mus musculus OX=10090 GN=H2az2 PE=1 SV=3;Histone H2A.Z OS=Mus musculus OX=10090 GN=H2az1 PE=1 SV=2	2	2	43	13.509	128	0	41.502	0//1	1//0	0//1	88035000	5	5			-1;-1	17607000	17607000	124660000	6.84213e+07	282.469	0.450231
sp|P14438|HA2U_MOUSE	H2-Aa	sp|P14438|HA2U_MOUSE;sp|P14434|HA2B_MOUSE	sp|P14438|HA2U_MOUSE;sp|P14434|HA2B_MOUSE	H-2 class II histocompatibility antigen, A-U alpha chain (Fragment) OS=Mus musculus OX=10090 GN=H2-Aa PE=1 SV=1;H-2 class II histocompatibility antigen, A-B alpha chain OS=Mus musculus OX=10090 GN=H2-Aa PE=1 SV=2	2	6	31.7	25.135	227	0	129.08	0//0	1//0	0//0	140080000	8	17			-1;-1	17509000	17509000	176070000	8.00973e+07	280.897	0.447725
sp|Q9DCS9|NDUBA_MOUSE	Ndufb10	sp|Q9DCS9|NDUBA_MOUSE	sp|Q9DCS9|NDUBA_MOUSE	NADH dehydrogenase [ubiquinone] 1 beta subcomplex subunit 10 OS=Mus musculus OX=10090 GN=Ndufb10 PE=1 SV=3	1	7	51.1	21.024	176	0	165.4	0//0	1//0	0//0	172950000	10	16			-1	17295000	17295000	224350000	7.57811e+07	277.464	0.442253
sp|P15532|NDKA_MOUSE	Nme1	sp|P15532|NDKA_MOUSE	sp|P15532|NDKA_MOUSE	Nucleoside diphosphate kinase A OS=Mus musculus OX=10090 GN=Nme1 PE=1 SV=1	1	7	53.3	17.208	152	0	73.499	0//0	1//0	0//0	187590000	11	18			-1	17054000	17054000	236940000	1.10424e+08	273.598	0.43609
sp|Q3TYS2|CYBC1_MOUSE	Cybc1	sp|Q3TYS2|CYBC1_MOUSE	sp|Q3TYS2|CYBC1_MOUSE	Cytochrome b-245 chaperone 1 OS=Mus musculus OX=10090 GN=Cybc1 PE=1 SV=2	1	8	23.5	20.921	187	0	71.773	0//0	1//0	0//0	187250000	11	18			-1	17023000	17023000	231550000	1.08936e+08	273.1	0.435298
sp|O35704|SPTC1_MOUSE	Sptlc1	sp|O35704|SPTC1_MOUSE	sp|O35704|SPTC1_MOUSE	Serine palmitoyltransferase 1 OS=Mus musculus OX=10090 GN=Sptlc1 PE=1 SV=2	1	9	26.6	52.534	473	0	130.5	0//0	1//0	0//0	337300000	20	20			-1	16865000	16865000	420730000	1.22664e+08	270.565	0.431257
sp|Q9CQU3|RER1_MOUSE	Rer1	sp|Q9CQU3|RER1_MOUSE	sp|Q9CQU3|RER1_MOUSE	Protein RER1 OS=Mus musculus OX=10090 GN=Rer1 PE=1 SV=1	1	3	18.9	22.988	196	0	32.403	0//0	1//0	0//0	151270000	9	8			-1	16807000	16807000	198790000	1.17565e+08	269.635	0.429774
sp|Q8R317-2|UBQL1_MOUSE	Ubqln1	sp|Q8R317-2|UBQL1_MOUSE;sp|Q8R317|UBQL1_MOUSE;sp|Q99NB8|UBQL4_MOUSE	sp|Q8R317-2|UBQL1_MOUSE;sp|Q8R317|UBQL1_MOUSE	Isoform 2 of Ubiquilin-1 OS=Mus musculus OX=10090 GN=Ubqln1;Ubiquilin-1 OS=Mus musculus OX=10090 GN=Ubqln1 PE=1 SV=1	3	6	11.6	58.677	554	0	242	0//0	1//0	0//0	232280000	14	20			-1;-1;-1	16591000	16591000	307620000	1.21932e+08	266.17	0.424251
sp|Q920A9|FCRLA_MOUSE	Fcrla	sp|Q920A9|FCRLA_MOUSE;sp|Q920A9-2|FCRLA_MOUSE	sp|Q920A9|FCRLA_MOUSE;sp|Q920A9-2|FCRLA_MOUSE	Fc receptor-like A OS=Mus musculus OX=10090 GN=Fcrla PE=1 SV=1;Isoform 2 of Fc receptor-like A OS=Mus musculus OX=10090 GN=Fcrla	2	6	22.7	38.348	352	0	107.26	0//0	1//0	0//0	214610000	13	23			-1;-1	16508000	16508000	276410000	1.30102e+08	264.838	0.422128
sp|Q91VS7|MGST1_MOUSE	Mgst1	sp|Q91VS7|MGST1_MOUSE	sp|Q91VS7|MGST1_MOUSE	Microsomal glutathione S-transferase 1 OS=Mus musculus OX=10090 GN=Mgst1 PE=1 SV=3	1	3	18.1	17.551	155	0	31.265	0//0	1//0	0//0	82053000	5	10			-1	16411000	16411000	105570000	6.37724e+07	263.282	0.419648
sp|P56400|GP1BB_MOUSE	Gp1bb	sp|P56400|GP1BB_MOUSE	sp|P56400|GP1BB_MOUSE	Platelet glycoprotein Ib beta chain OS=Mus musculus OX=10090 GN=Gp1bb PE=1 SV=1	1	4	32.5	21.763	206	0	24.853	0//0	1//0	0//0	81486000	5	10			-1	16297000	16297000	95321000	5.73064e+07	261.453	0.416733
sp|Q99P72-5|RTN4_MOUSE	Rtn4	sp|Q99P72-5|RTN4_MOUSE;sp|Q99P72-4|RTN4_MOUSE;sp|Q99P72|RTN4_MOUSE;sp|Q99P72-1|RTN4_MOUSE;sp|Q99P72-3|RTN4_MOUSE	sp|Q99P72-5|RTN4_MOUSE;sp|Q99P72-4|RTN4_MOUSE;sp|Q99P72|RTN4_MOUSE	Isoform B of Reticulon-4 OS=Mus musculus OX=10090 GN=Rtn4;Isoform B2 of Reticulon-4 OS=Mus musculus OX=10090 GN=Rtn4;Reticulon-4 OS=Mus musculus OX=10090 GN=Rtn4 PE=1 SV=2	5	4	24.7	38.403	356	0	49.899	0//0	1//0	0//0	162820000	10	17			-1;-1;-1;-1;-1	16282000	16282000	207260000	1.02997e+08	261.212	0.416349
sp|Q8BU33|HACL2_MOUSE	Ilvbl	sp|Q8BU33|HACL2_MOUSE;sp|Q8BU33-3|HACL2_MOUSE;sp|Q8BU33-2|HACL2_MOUSE	sp|Q8BU33|HACL2_MOUSE;sp|Q8BU33-3|HACL2_MOUSE;sp|Q8BU33-2|HACL2_MOUSE	2-hydroxyacyl-CoA lyase 2 OS=Mus musculus OX=10090 GN=Ilvbl PE=1 SV=1;Isoform 3 of 2-hydroxyacyl-CoA lyase 2 OS=Mus musculus OX=10090 GN=Ilvbl;Isoform 2 of 2-hydroxyacyl-CoA lyase 2 OS=Mus musculus OX=10090 GN=Ilvbl	3	17	36.7	68.155	632	0	214.52	0//0	1//0	0//0	367130000	23	40			-1;-1;-1	15962000	15962000	472710000	1.21326e+08	256.079	0.408167
sp|Q9CQX2|CYB5B_MOUSE	Cyb5b	sp|Q9CQX2|CYB5B_MOUSE	sp|Q9CQX2|CYB5B_MOUSE	Cytochrome b5 type B OS=Mus musculus OX=10090 GN=Cyb5b PE=1 SV=1	1	4	41.1	16.318	146	0	46.417	0//0	1//0	0//0	89194000	6	7			-1	14866000	14866000	112580000	6.02952e+07	238.495	0.380141
sp|Q9CQJ8|NDUB9_MOUSE	Ndufb9	sp|Q9CQJ8|NDUB9_MOUSE	sp|Q9CQJ8|NDUB9_MOUSE	NADH dehydrogenase [ubiquinone] 1 beta subcomplex subunit 9 OS=Mus musculus OX=10090 GN=Ndufb9 PE=1 SV=3	1	6	53.1	21.984	179	0	71.221	0//0	1//0	0//0	115180000	8	16			-1	14397000	14397000	148020000	6.69474e+07	230.971	0.368148
sp|Q9QYA2|TOM40_MOUSE	Tomm40	sp|Q9QYA2|TOM40_MOUSE	sp|Q9QYA2|TOM40_MOUSE	Mitochondrial import receptor subunit TOM40 homolog OS=Mus musculus OX=10090 GN=Tomm40 PE=1 SV=3	1	8	39.1	37.895	361	0	98.075	0//0	1//0	0//0	154460000	11	15			-1	14042000	14042000	205060000	9.35569e+07	225.276	0.35907
sp|Q8BLF1|NCEH1_MOUSE	Nceh1	sp|Q8BLF1|NCEH1_MOUSE	sp|Q8BLF1|NCEH1_MOUSE	Neutral cholesterol ester hydrolase 1 OS=Mus musculus OX=10090 GN=Nceh1 PE=1 SV=1	1	8	27.5	45.739	408	0	96.033	0//0	1//0	0//0	238460000	18	21			-1	13248000	13248000	302720000	1.2589e+08	212.538	0.338767
sp|Q9QY76|VAPB_MOUSE	Vapb	sp|Q9QY76|VAPB_MOUSE	sp|Q9QY76|VAPB_MOUSE	Vesicle-associated membrane protein-associated protein B OS=Mus musculus OX=10090 GN=Vapb PE=1 SV=3	1	6	42.4	26.946	243	0	72.915	0//0	1//0	0//0	170860000	13	19			-1	13143000	13143000	222830000	1.02091e+08	210.853	0.336082
sp|Q3U2S8|HVCN1_MOUSE	Hvcn1	sp|Q3U2S8|HVCN1_MOUSE	sp|Q3U2S8|HVCN1_MOUSE	Voltage-gated hydrogen channel 1 OS=Mus musculus OX=10090 GN=Hvcn1 PE=1 SV=2	1	6	20.4	31.242	269	0	158.92	0//0	1//0	0//0	130710000	10	14			-1	13071000	13071000	165720000	9.12383e+07	209.698	0.33424
sp|P47758|SRPRB_MOUSE	Srprb	sp|P47758|SRPRB_MOUSE	sp|P47758|SRPRB_MOUSE	Signal recognition particle receptor subunit beta OS=Mus musculus OX=10090 GN=Srprb PE=1 SV=1	1	10	45.4	29.579	269	0	123.86	0//0	1//0	0//0	207630000	16	19			-1	12977000	12977000	273140000	8.00232e+07	208.19	0.331837
sp|Q9CQC9|SAR1B_MOUSE	Sar1b	sp|Q9CQC9|SAR1B_MOUSE	sp|Q9CQC9|SAR1B_MOUSE	GTP-binding protein SAR1b OS=Mus musculus OX=10090 GN=Sar1b PE=1 SV=1	1	7	58.1	22.382	198	0	52.711	0//0	1//0	0//0	128470000	10	15			-1	12847000	12847000	164490000	8.11455e+07	206.105	0.328513
sp|Q9D162-2|CC167_MOUSE	Ccdc167	sp|Q9D162-2|CC167_MOUSE;sp|Q9D162|CC167_MOUSE;sp|Q9D162-3|CC167_MOUSE	sp|Q9D162-2|CC167_MOUSE;sp|Q9D162|CC167_MOUSE;sp|Q9D162-3|CC167_MOUSE	Isoform 2 of Coiled-coil domain-containing protein 167 OS=Mus musculus OX=10090 GN=Ccdc167;Coiled-coil domain-containing protein 167 OS=Mus musculus OX=10090 GN=Ccdc167 PE=1 SV=2;Isoform 3 of Coiled-coil domain-containing protein 167 OS=Mus musculus OX=100	3	3	33.7	12.326	104	0	101.58	0//0	1//0	0//0	51145000	4	8			-1;-1;-1	12786000	12786000	64632000	3.97508e+07	205.126	0.326953
sp|Q9D7E4|CS025_MOUSE		sp|Q9D7E4|CS025_MOUSE	sp|Q9D7E4|CS025_MOUSE	UPF0449 protein C19orf25 homolog OS=Mus musculus OX=10090 PE=1 SV=1	1	4	66.1	12.111	109	0	88.961	0//0	1//0	0//0	76596000	6	9			-1	12766000	12766000	98459000	5.02947e+07	204.805	0.326441
sp|O70404|VAMP8_MOUSE	Vamp8	sp|O70404|VAMP8_MOUSE	sp|O70404|VAMP8_MOUSE	Vesicle-associated membrane protein 8 OS=Mus musculus OX=10090 GN=Vamp8 PE=1 SV=1	1	4	40.6	11.451	101	0	30.788	0//0	1//0	0//0	76556000	6	9			-1	12759000	12759000	94323000	5.43062e+07	204.693	0.326262
sp|Q9CR60|GOT1B_MOUSE	Golt1b	sp|Q9CR60|GOT1B_MOUSE	sp|Q9CR60|GOT1B_MOUSE	Vesicle transport protein GOT1B OS=Mus musculus OX=10090 GN=Golt1b PE=1 SV=1	1	3	20.3	15.421	138	0	33.833	0//0	1//0	0//0	76358000	6	9			-1	12726000	12726000	100330000	5.9346e+07	204.163	0.325418
sp|P61804|DAD1_MOUSE	Dad1	sp|P61804|DAD1_MOUSE	sp|P61804|DAD1_MOUSE	Dolichyl-diphosphooligosaccharide--protein glycosyltransferase subunit DAD1 OS=Mus musculus OX=10090 GN=Dad1 PE=1 SV=3	1	4	46.9	12.497	113	0	75.326	0//0	1//0	0//0	62726000	5	6			-1	12545000	12545000	89421000	4.36587e+07	201.26	0.32079
sp|O35609|SCAM3_MOUSE	Scamp3	sp|O35609|SCAM3_MOUSE	sp|O35609|SCAM3_MOUSE	Secretory carrier-associated membrane protein 3 OS=Mus musculus OX=10090 GN=Scamp3 PE=1 SV=3	1	5	30.7	38.458	349	0	108.23	0//0	1//0	0//0	100330000	8	13			-1	12542000	12542000	128980000	6.06715e+07	201.212	0.320713
sp|Q7TQ95|LNP_MOUSE	Lnpk	sp|Q7TQ95|LNP_MOUSE	sp|Q7TQ95|LNP_MOUSE	Endoplasmic reticulum junction formation protein lunapark OS=Mus musculus OX=10090 GN=Lnpk PE=1 SV=1	1	10	39.8	47.499	425	0	100.18	0//0	1//0	0//0	271100000	22	26			-1	12323000	12323000	346990000	1.2456e+08	197.698	0.315113
sp|P97300-3|NPTN_MOUSE	Nptn	sp|P97300-3|NPTN_MOUSE;sp|P97300-1|NPTN_MOUSE;sp|P97300|NPTN_MOUSE;sp|P97300-4|NPTN_MOUSE	sp|P97300-3|NPTN_MOUSE;sp|P97300-1|NPTN_MOUSE;sp|P97300|NPTN_MOUSE	Isoform 3 of Neuroplastin OS=Mus musculus OX=10090 GN=Nptn;Isoform 1 of Neuroplastin OS=Mus musculus OX=10090 GN=Nptn;Neuroplastin OS=Mus musculus OX=10090 GN=Nptn PE=1 SV=3	4	6	22	30.821	277	0	47.73	0//0	1//0	0//0	160040000	13	19			-1;-1;-1;-1	12311000	12311000	205700000	1.01488e+08	197.506	0.314806
sp|P11911|CD79A_MOUSE	Cd79a	sp|P11911|CD79A_MOUSE	sp|P11911|CD79A_MOUSE	B-cell antigen receptor complex-associated protein alpha chain OS=Mus musculus OX=10090 GN=Cd79a PE=1 SV=2	1	5	27.7	24.583	220	0	34.452	0//0	1//0	0//0	109490000	9	9			-1	12165000	12165000	145690000	7.80599e+07	195.163	0.311073
sp|Q9JJA2|COG8_MOUSE	Cog8	sp|Q9JJA2|COG8_MOUSE	sp|Q9JJA2|COG8_MOUSE	Conserved oligomeric Golgi complex subunit 8 OS=Mus musculus OX=10090 GN=Cog8 PE=1 SV=3	1	12	25.5	71.601	640	0	126.43	0//0	1//0	0//0	328370000	27	30			-1	12162000	12162000	416860000	1.15929e+08	195.115	0.310996
sp|Q91YN9|BAG2_MOUSE	Bag2	sp|Q91YN9|BAG2_MOUSE	sp|Q91YN9|BAG2_MOUSE	BAG family molecular chaperone regulator 2 OS=Mus musculus OX=10090 GN=Bag2 PE=1 SV=1	1	9	48.1	23.473	210	0	232.24	0//0	1//0	0//0	169030000	14	17			-1	12074000	12074000	218060000	9.17797e+07	193.703	0.308746
sp|Q8BHZ0|CYRIA_MOUSE	Cyria	sp|Q8BHZ0|CYRIA_MOUSE	sp|Q8BHZ0|CYRIA_MOUSE	CYFIP-related Rac1 interactor A OS=Mus musculus OX=10090 GN=Cyria PE=1 SV=1	1	7	29.7	37.342	323	0	107.96	0//0	1//0	0//0	215740000	18	21			-1	11985000	11985000	272440000	9.49516e+07	192.276	0.30647
sp|Q8R404|MIC13_MOUSE	Micos13	sp|Q8R404|MIC13_MOUSE	sp|Q8R404|MIC13_MOUSE	MICOS complex subunit MIC13 OS=Mus musculus OX=10090 GN=Micos13 PE=1 SV=1	1	3	50.4	13.373	119	0	40.334	0//0	1//0	0//0	35871000	3	10			-1	11957000	11957000	47899000	2.78792e+07	191.826	0.305754
sp|Q8BFZ9|ERLN2_MOUSE	Erlin2	sp|Q8BFZ9|ERLN2_MOUSE	sp|Q8BFZ9|ERLN2_MOUSE	Erlin-2 OS=Mus musculus OX=10090 GN=Erlin2 PE=1 SV=1	1	13	41.2	37.872	340	0	199.95	0//0	1//0	0//0	244340000	21	31			-1	11635000	11635000	308210000	8.60036e+07	186.661	0.29752
sp|Q91V04|TRAM1_MOUSE	Tram1	sp|Q91V04|TRAM1_MOUSE	sp|Q91V04|TRAM1_MOUSE	Translocating chain-associated membrane protein 1 OS=Mus musculus OX=10090 GN=Tram1 PE=1 SV=3	1	3	14.2	43.039	374	0	120.08	0//0	1//0	0//0	127140000	11	9			-1	11558000	11558000	170600000	9.88118e+07	185.425	0.295551
sp|P08508|FCGR3_MOUSE	Fcgr3	sp|P08508|FCGR3_MOUSE;sp|P08101-2|FCGR2_MOUSE;sp|P08101-3|FCGR2_MOUSE;sp|P08101|FCGR2_MOUSE	sp|P08508|FCGR3_MOUSE	Low affinity immunoglobulin gamma Fc region receptor III OS=Mus musculus OX=10090 GN=Fcgr3 PE=1 SV=1	4	5	21.5	30.036	261	0	101.68	0//0	1//0	0//0	143980000	13	11			-1;-1;-1;-1	11075000	11075000	179090000	1.06063e+08	177.676	0.2832
sp|Q3TC33|CC127_MOUSE	Ccdc127	sp|Q3TC33|CC127_MOUSE;sp|Q3TC33-2|CC127_MOUSE	sp|Q3TC33|CC127_MOUSE;sp|Q3TC33-2|CC127_MOUSE	Coiled-coil domain-containing protein 127 OS=Mus musculus OX=10090 GN=Ccdc127 PE=1 SV=2;Isoform 2 of Coiled-coil domain-containing protein 127 OS=Mus musculus OX=10090 GN=Ccdc127	2	7	34.6	30.509	260	0	114.5	0//0	1//0	0//0	153670000	14	13			-1;-1	10977000	10977000	199600000	8.3611e+07	176.104	0.280694
sp|Q9CXP8|GBG10_MOUSE	Gng10	sp|Q9CXP8|GBG10_MOUSE	sp|Q9CXP8|GBG10_MOUSE	Guanine nucleotide-binding protein G(I)/G(S)/G(O) subunit gamma-10 OS=Mus musculus OX=10090 GN=Gng10 PE=3 SV=1	1	3	69.1	7.2293	68	0	74.298	0//0	1//0	0//0	43583000	4	4			-1	10896000	10896000	52182000	3.38736e+07	174.805	0.278623
sp|Q9CY27|TECR_MOUSE	Tecr	sp|Q9CY27|TECR_MOUSE	sp|Q9CY27|TECR_MOUSE	Very-long-chain enoyl-CoA reductase OS=Mus musculus OX=10090 GN=Tecr PE=1 SV=1	1	5	16.2	36.09	308	0	35.235	0//0	1//0	0//0	150270000	14	9			-1	10734000	10734000	194420000	1.08444e+08	172.206	0.274481
sp|Q99LR1|ABD12_MOUSE	Abhd12	sp|Q99LR1|ABD12_MOUSE;sp|Q99LR1-2|ABD12_MOUSE	sp|Q99LR1|ABD12_MOUSE;sp|Q99LR1-2|ABD12_MOUSE	Lysophosphatidylserine lipase ABHD12 OS=Mus musculus OX=10090 GN=Abhd12 PE=1 SV=2;Isoform 2 of Lysophosphatidylserine lipase ABHD12 OS=Mus musculus OX=10090 GN=Abhd12	2	13	42	45.269	398	0	120.46	0//0	1//0	0//0	203680000	19	24			-1;-1	10720000	10720000	258840000	6.75551e+07	171.981	0.274123
sp|Q9DC16|ERGI1_MOUSE	Ergic1	sp|Q9DC16|ERGI1_MOUSE	sp|Q9DC16|ERGI1_MOUSE	Endoplasmic reticulum-Golgi intermediate compartment protein 1 OS=Mus musculus OX=10090 GN=Ergic1 PE=1 SV=1	1	6	25.5	32.562	290	0	41.16	0//0	1//0	0//0	127690000	12	11			-1	10641000	10641000	169470000	7.32691e+07	170.714	0.272103
sp|Q9D1H9|MFAP4_MOUSE	Mfap4	sp|Q9D1H9|MFAP4_MOUSE;sp|Q9D1H9-2|MFAP4_MOUSE	sp|Q9D1H9|MFAP4_MOUSE;sp|Q9D1H9-2|MFAP4_MOUSE	Microfibril-associated glycoprotein 4 OS=Mus musculus OX=10090 GN=Mfap4 PE=1 SV=1;Isoform 2 of Microfibril-associated glycoprotein 4 OS=Mus musculus OX=10090 GN=Mfap4	2	2	23	28.937	257	0	63.26	0//0	1//0	0//0	71318000	7	8			-1;-1	10188000	10188000	89807000	5.54291e+07	163.446	0.260519
sp|P36536|SAR1A_MOUSE	Sar1a	sp|P36536|SAR1A_MOUSE	sp|P36536|SAR1A_MOUSE	GTP-binding protein SAR1a OS=Mus musculus OX=10090 GN=Sar1a PE=1 SV=1	1	4	45.5	22.371	198	0	78.692	0//0	1//0	0//0	101810000	10	15			-1	10181000	10181000	137210000	7.08931e+07	163.334	0.26034
sp|Q9CQC6|BZW1_MOUSE	Bzw1	sp|Q9CQC6|BZW1_MOUSE	sp|Q9CQC6|BZW1_MOUSE	Basic leucine zipper and W2 domain-containing protein 1 OS=Mus musculus OX=10090 GN=Bzw1 PE=1 SV=1	1	9	30.8	48.043	419	0	86.778	0//0	1//0	0//0	253500000	25	15			-1	10140000	10140000	322950000	1.3411e+08	162.676	0.259291
sp|Q9CQY5-2|MAGT1_MOUSE	Magt1	sp|Q9CQY5-2|MAGT1_MOUSE;sp|Q9CQY5-3|MAGT1_MOUSE;sp|Q9CQY5|MAGT1_MOUSE	sp|Q9CQY5-2|MAGT1_MOUSE;sp|Q9CQY5-3|MAGT1_MOUSE;sp|Q9CQY5|MAGT1_MOUSE	Isoform 2 of Magnesium transporter protein 1 OS=Mus musculus OX=10090 GN=Magt1;Isoform 3 of Magnesium transporter protein 1 OS=Mus musculus OX=10090 GN=Magt1;Magnesium transporter protein 1 OS=Mus musculus OX=10090 GN=Magt1 PE=1 SV=1	3	6	19.6	34.568	306	0	37.784	0//0	1//0	0//0	131650000	13	13			-1;-1;-1	10127000	10127000	169880000	7.66473e+07	162.468	0.258959
sp|Q9CR61|NDUB7_MOUSE	Ndufb7	sp|Q9CR61|NDUB7_MOUSE	sp|Q9CR61|NDUB7_MOUSE	NADH dehydrogenase [ubiquinone] 1 beta subcomplex subunit 7 OS=Mus musculus OX=10090 GN=Ndufb7 PE=1 SV=3	1	6	46	16.331	137	0	53.884	0//0	1//0	0//0	80605000	8	12			-1	10076000	10076000	103290000	3.99479e+07	161.649	0.257655
sp|Q8BR70|YIPF6_MOUSE	Yipf6	sp|Q8BR70|YIPF6_MOUSE	sp|Q8BR70|YIPF6_MOUSE	Protein YIPF6 OS=Mus musculus OX=10090 GN=Yipf6 PE=1 SV=1	1	2	6.4	26.087	236	0.001652	12.334	0//0	1//0	0//0	79453000	8	5			-1	9931600	9931600	103610000	6.17511e+07	159.333	0.253962
sp|Q9EQS3|MYCBP_MOUSE	Mycbp	sp|Q9EQS3|MYCBP_MOUSE	sp|Q9EQS3|MYCBP_MOUSE	c-Myc-binding protein OS=Mus musculus OX=10090 GN=Mycbp PE=1 SV=5	1	4	57.3	11.97	103	0	40.086	0//0	1//0	0//0	59243000	6	9			-1	9873900	9873900	74980000	3.59756e+07	158.407	0.252487
sp|P08226|APOE_MOUSE	Apoe	sp|P08226|APOE_MOUSE	sp|P08226|APOE_MOUSE	Apolipoprotein E OS=Mus musculus OX=10090 GN=Apoe PE=1 SV=2	1	7	28	35.866	311	0	63.002	0//0	1//0	0//0	147290000	15	14			-1	9819500	9819500	186930000	8.54769e+07	157.534	0.251096
sp|Q9CQW9|IFM3_MOUSE	Ifitm3	sp|Q9CQW9|IFM3_MOUSE;sp|Q99J93|IFM2_MOUSE	sp|Q9CQW9|IFM3_MOUSE;sp|Q99J93|IFM2_MOUSE	Interferon-induced transmembrane protein 3 OS=Mus musculus OX=10090 GN=Ifitm3 PE=1 SV=1;Interferon-induced transmembrane protein 2 OS=Mus musculus OX=10090 GN=Ifitm2 PE=1 SV=1	2	2	20.4	14.954	137	0.0021918	12.234	0//0	1//0	0//0	38572000	4	3			-1;-1	9643000	9643000	53762000	2.99788e+07	154.703	0.246583
sp|O88531|PPT1_MOUSE	Ppt1	sp|O88531|PPT1_MOUSE	sp|O88531|PPT1_MOUSE	Palmitoyl-protein thioesterase 1 OS=Mus musculus OX=10090 GN=Ppt1 PE=1 SV=2	1	9	41.2	34.49	306	0	189.03	0//0	1//0	0//0	134630000	14	28			-1	9616400	9616400	174290000	5.63012e+07	154.276	0.245902
sp|Q9D379|HYEP_MOUSE	Ephx1	sp|Q9D379|HYEP_MOUSE	sp|Q9D379|HYEP_MOUSE	Epoxide hydrolase 1 OS=Mus musculus OX=10090 GN=Ephx1 PE=1 SV=2	1	15	41.5	52.576	455	0	106.84	0//0	1//0	0//0	249920000	26	27			-1	9612200	9612200	321940000	9.27922e+07	154.209	0.245795
sp|Q8VDL4|ADPGK_MOUSE	Adpgk	sp|Q8VDL4|ADPGK_MOUSE;sp|Q8VDL4-3|ADPGK_MOUSE;sp|Q8VDL4-2|ADPGK_MOUSE	sp|Q8VDL4|ADPGK_MOUSE;sp|Q8VDL4-3|ADPGK_MOUSE	ADP-dependent glucokinase OS=Mus musculus OX=10090 GN=Adpgk PE=1 SV=2;Isoform 3 of ADP-dependent glucokinase OS=Mus musculus OX=10090 GN=Adpgk	3	8	22.4	53.902	496	0	153.11	0//0	1//0	0//0	169180000	18	26			-1;-1;-1	9398900	9398900	219860000	6.8735e+07	150.787	0.240341
sp|P97352|S10AD_MOUSE	S100a13	sp|P97352|S10AD_MOUSE	sp|P97352|S10AD_MOUSE	Protein S100-A13 OS=Mus musculus OX=10090 GN=S100a13 PE=1 SV=1	1	2	36.7	11.158	98	0	55.755	0//0	1//0	0//0	55335000	6	3			-1	9222600	9222600	72121000	4.3007e+07	147.958	0.235832
sp|O88188|LY86_MOUSE	Ly86	sp|O88188|LY86_MOUSE	sp|O88188|LY86_MOUSE	Lymphocyte antigen 86 OS=Mus musculus OX=10090 GN=Ly86 PE=1 SV=1	1	3	46.9	17.811	162	0	45.364	0//0	1//0	0//0	44185000	5	6			-1	8837000	8837000	55417000	3.43412e+07	141.772	0.225972
sp|O08917|FLOT1_MOUSE	Flot1	sp|O08917|FLOT1_MOUSE	sp|O08917|FLOT1_MOUSE	Flotillin-1 OS=Mus musculus OX=10090 GN=Flot1 PE=1 SV=1	1	12	34.1	47.513	428	0	119.25	0//0	1//0	0//0	247360000	28	27			-1	8834100	8834100	319810000	7.73446e+07	141.726	0.225898
sp|O09111|NDUBB_MOUSE	Ndufb11	sp|O09111|NDUBB_MOUSE	sp|O09111|NDUBB_MOUSE	NADH dehydrogenase [ubiquinone] 1 beta subcomplex subunit 11, mitochondrial OS=Mus musculus OX=10090 GN=Ndufb11 PE=1 SV=2	1	2	19.2	17.444	151	0.00060716	17.129	0//0	1//0	0//0	70477000	8	5			-1	8809600	8809600	89782000	5.47753e+07	141.333	0.225272
sp|Q80WQ2|VAC14_MOUSE	Vac14	sp|Q80WQ2|VAC14_MOUSE	sp|Q80WQ2|VAC14_MOUSE	Protein VAC14 homolog OS=Mus musculus OX=10090 GN=Vac14 PE=1 SV=1	1	17	28.8	88.047	782	0	242.16	0//0	1//0	0//0	368660000	42	42			-1	8777600	8777600	478600000	1.09106e+08	140.819	0.224453
sp|Q3TBT3-3|STING_MOUSE	Sting1	sp|Q3TBT3-3|STING_MOUSE;sp|Q3TBT3|STING_MOUSE;sp|Q3TBT3-2|STING_MOUSE	sp|Q3TBT3-3|STING_MOUSE;sp|Q3TBT3|STING_MOUSE;sp|Q3TBT3-2|STING_MOUSE	Isoform 3 of Stimulator of interferon genes protein OS=Mus musculus OX=10090 GN=Sting1;Stimulator of interferon genes protein OS=Mus musculus OX=10090 GN=Sting1 PE=1 SV=2;Isoform 2 of Stimulator of interferon genes protein OS=Mus musculus OX=10090 GN=Sting	3	6	23.4	38.036	337	0	101.65	0//0	1//0	0//0	130870000	15	17			-1;-1;-1	8724700	8724700	168780000	7.54799e+07	139.971	0.223101
sp|Q9D6J5|NDUB8_MOUSE	Ndufb8	sp|Q9D6J5|NDUB8_MOUSE	sp|Q9D6J5|NDUB8_MOUSE	NADH dehydrogenase [ubiquinone] 1 beta subcomplex subunit 8, mitochondrial OS=Mus musculus OX=10090 GN=Ndufb8 PE=1 SV=1	1	4	32.3	21.876	186	0	33.109	0//0	1//0	0//0	86178000	10	8			-1	8617800	8617800	111660000	5.57662e+07	138.256	0.220367
sp|P63024|VAMP3_MOUSE	Vamp3	sp|P63024|VAMP3_MOUSE;sp|P63044|VAMP2_MOUSE	sp|P63024|VAMP3_MOUSE	Vesicle-associated membrane protein 3 OS=Mus musculus OX=10090 GN=Vamp3 PE=1 SV=1	2	3	39.8	11.48	103	0	66.636	0//0	1//0	0//0	43043000	5	4			-1;-1	8608600	8608600	53637000	3.34529e+07	138.108	0.220132
sp|P36371|TAP2_MOUSE	Tap2	sp|P36371|TAP2_MOUSE	sp|P36371|TAP2_MOUSE	Antigen peptide transporter 2 OS=Mus musculus OX=10090 GN=Tap2 PE=1 SV=1	1	9	19.9	77.444	702	0	138.91	0//0	1//0	0//0	272800000	32	25			-1	8525000	8525000	349900000	1.0731e+08	136.767	0.217994
sp|Q9CQ85|TIM22_MOUSE	Timm22	sp|Q9CQ85|TIM22_MOUSE	sp|Q9CQ85|TIM22_MOUSE	Mitochondrial import inner membrane translocase subunit Tim22 OS=Mus musculus OX=10090 GN=Timm22 PE=1 SV=1	1	5	27.3	20.114	194	0	45.885	0//0	1//0	0//0	59162000	7	12			-1	8451800	8451800	76370000	3.85411e+07	135.592	0.216122
sp|Q9CQZ6|NDUB3_MOUSE	Ndufb3	sp|Q9CQZ6|NDUB3_MOUSE	sp|Q9CQZ6|NDUB3_MOUSE	NADH dehydrogenase [ubiquinone] 1 beta subcomplex subunit 3 OS=Mus musculus OX=10090 GN=Ndufb3 PE=1 SV=1	1	2	17.3	11.692	104	0.0011905	15.695	0//0	1//0	0//0	42218000	5	6			-1	8443500	8443500	54901000	3.28117e+07	135.459	0.21591
sp|Q91YT2|RN185_MOUSE	Rnf185	sp|Q91YT2|RN185_MOUSE;sp|Q91YT2-2|RN185_MOUSE	sp|Q91YT2|RN185_MOUSE;sp|Q91YT2-2|RN185_MOUSE	E3 ubiquitin-protein ligase RNF185 OS=Mus musculus OX=10090 GN=Rnf185 PE=2 SV=1;Isoform 2 of E3 ubiquitin-protein ligase RNF185 OS=Mus musculus OX=10090 GN=Rnf185	2	2	11.5	20.52	192	0.0021716	11.859	0//0	1//0	0//0	50218000	6	6			-1;-1	8369700	8369700	62052000	3.903e+07	134.275	0.214023
sp|P59235|NUP43_MOUSE	Nup43	sp|P59235|NUP43_MOUSE	sp|P59235|NUP43_MOUSE	Nucleoporin Nup43 OS=Mus musculus OX=10090 GN=Nup43 PE=1 SV=2	1	7	27.4	41.989	380	0	97.142	0//0	1//0	0//0	97713000	12	12			-1	8142700	8142700	124830000	6.39187e+07	130.633	0.208218
sp|Q62087|PON3_MOUSE	Pon3	sp|Q62087|PON3_MOUSE	sp|Q62087|PON3_MOUSE	Serum paraoxonase/lactonase 3 OS=Mus musculus OX=10090 GN=Pon3 PE=1 SV=2	1	5	36.4	39.351	354	0	56.087	0//0	1//0	0//0	105500000	13	9			-1	8115400	8115400	133160000	7.31059e+07	130.196	0.20752
sp|Q3TWL2|PP4P1_MOUSE	Pip4p1	sp|Q3TWL2|PP4P1_MOUSE	sp|Q3TWL2|PP4P1_MOUSE	Type 1 phosphatidylinositol 4,5-bisphosphate 4-phosphatase OS=Mus musculus OX=10090 GN=Pip4p1 PE=1 SV=1	1	7	26.4	30.047	284	0	63.795	0//0	1//0	0//0	105030000	13	13			-1	8079200	8079200	133850000	4.72401e+07	129.615	0.206594
sp|O35250-2|EXOC7_MOUSE	Exoc7	sp|O35250-2|EXOC7_MOUSE;sp|O35250|EXOC7_MOUSE	sp|O35250-2|EXOC7_MOUSE;sp|O35250|EXOC7_MOUSE	Isoform 2 of Exocyst complex component 7 OS=Mus musculus OX=10090 GN=Exoc7;Exocyst complex component 7 OS=Mus musculus OX=10090 GN=Exoc7 PE=1 SV=2	2	16	31.1	75.158	653	0	217.84	0//0	1//0	1//0	263580000	33	37			-1;-1	7987200	7987200	332150000	8.11481e+07	128.139	0.204242
sp|Q8BGX2|TIM29_MOUSE	Timm29	sp|Q8BGX2|TIM29_MOUSE	sp|Q8BGX2|TIM29_MOUSE	Mitochondrial import inner membrane translocase subunit Tim29 OS=Mus musculus OX=10090 GN=Timm29 PE=1 SV=1	1	6	26.3	29.415	266	0	46.337	0//0	1//0	0//0	103510000	13	14			-1	7962700	7962700	134530000	6.52263e+07	127.746	0.203615
sp|Q9CX30-2|YIF1B_MOUSE	Yif1b	sp|Q9CX30-2|YIF1B_MOUSE;sp|Q9CX30|YIF1B_MOUSE	sp|Q9CX30-2|YIF1B_MOUSE;sp|Q9CX30|YIF1B_MOUSE	Isoform 2 of Protein YIF1B OS=Mus musculus OX=10090 GN=Yif1b;Protein YIF1B OS=Mus musculus OX=10090 GN=Yif1b PE=1 SV=2	2	2	13	33.512	308	0	72.279	0//0	1//0	0//0	63093000	8	6			-1;-1	7886600	7886600	80879000	4.90364e+07	126.525	0.201669
sp|Q80W04|TMCC2_MOUSE	Tmcc2	sp|Q80W04|TMCC2_MOUSE	sp|Q80W04|TMCC2_MOUSE	Transmembrane and coiled-coil domains protein 2 OS=Mus musculus OX=10090 GN=Tmcc2 PE=1 SV=1	1	12	23.2	77.053	706	0	138.66	0//0	1//0	0//0	274740000	35	28			-1	7849600	7849600	354620000	9.33253e+07	125.931	0.200723
sp|Q9DBS1|TMM43_MOUSE	Tmem43	sp|Q9DBS1|TMM43_MOUSE	sp|Q9DBS1|TMM43_MOUSE	Transmembrane protein 43 OS=Mus musculus OX=10090 GN=Tmem43 PE=1 SV=1	1	9	29.2	44.783	400	0	98.289	0//0	1//0	0//0	155210000	20	22			-1	7760600	7760600	207810000	5.6272e+07	124.503	0.198447
sp|P35293|RAB18_MOUSE	Rab18	sp|P35293|RAB18_MOUSE	sp|P35293|RAB18_MOUSE	Ras-related protein Rab-18 OS=Mus musculus OX=10090 GN=Rab18 PE=1 SV=2	1	6	39.8	23.035	206	0	131.86	0//0	1//0	0//0	100410000	13	13			-1	7723700	7723700	127590000	5.89801e+07	123.911	0.197504
sp|Q4QQM4|P5I11_MOUSE	Trp53i11	sp|Q4QQM4|P5I11_MOUSE	sp|Q4QQM4|P5I11_MOUSE	Tumor protein p53-inducible protein 11 OS=Mus musculus OX=10090 GN=Trp53i11 PE=1 SV=1	1	2	13.2	20.91	189	0	18.836	0//0	1//0	0//0	46290000	6	5			-1	7715000	7715000	58213000	3.59773e+07	123.772	0.197281
sp|Q9CQE7|ERGI3_MOUSE	Ergic3	sp|Q9CQE7|ERGI3_MOUSE;sp|Q9CQE7-2|ERGI3_MOUSE	sp|Q9CQE7|ERGI3_MOUSE;sp|Q9CQE7-2|ERGI3_MOUSE	Endoplasmic reticulum-Golgi intermediate compartment protein 3 OS=Mus musculus OX=10090 GN=Ergic3 PE=1 SV=1;Isoform 2 of Endoplasmic reticulum-Golgi intermediate compartment protein 3 OS=Mus musculus OX=10090 GN=Ergic3	2	5	26.4	43.208	383	0	71.502	0//0	1//0	0//0	96134000	13	8			-1;-1	7394900	7394900	121770000	6.6042e+07	118.637	0.189096
sp|Q9CYH2|PXL2A_MOUSE	Prxl2a	sp|Q9CYH2|PXL2A_MOUSE	sp|Q9CYH2|PXL2A_MOUSE	Peroxiredoxin-like 2A OS=Mus musculus OX=10090 GN=Prxl2a PE=1 SV=2	1	6	34.9	24.394	218	0	44.122	0//0	1//0	0//0	95778000	13	13			-1	7367500	7367500	123770000	4.89537e+07	118.197	0.188395
sp|Q9ERN0|SCAM2_MOUSE	Scamp2	sp|Q9ERN0|SCAM2_MOUSE	sp|Q9ERN0|SCAM2_MOUSE	Secretory carrier-associated membrane protein 2 OS=Mus musculus OX=10090 GN=Scamp2 PE=1 SV=1	1	2	9.7	36.464	329	0	47.727	0//0	1//0	0//0	36656000	5	6			-1	7331200	7331200	45938000	2.84895e+07	117.615	0.187467
sp|Q61017|GBGT2_MOUSE	Gngt2	sp|Q61017|GBGT2_MOUSE	sp|Q61017|GBGT2_MOUSE	Guanine nucleotide-binding protein G(I)/G(S)/G(O) subunit gamma-T2 OS=Mus musculus OX=10090 GN=Gngt2 PE=3 SV=2	1	2	31.9	7.8019	69	0	19.462	0//0	1//0	0//0	21516000	3	6			-1	7171900	7171900	27667000	1.67223e+07	115.059	0.183394
sp|P62342|SELT_MOUSE	Selenot	sp|P62342|SELT_MOUSE	sp|P62342|SELT_MOUSE	Thioredoxin reductase-like selenoprotein T OS=Mus musculus OX=10090 GN=Selenot PE=1 SV=2	1	3	14.9	22.292	195	0	22.337	0//0	1//0	0//0	78293000	11	5			-1	7117500	7117500	100570000	6.08497e+07	114.186	0.182003
sp|Q62192|CD180_MOUSE	Cd180	sp|Q62192|CD180_MOUSE	sp|Q62192|CD180_MOUSE	CD180 antigen OS=Mus musculus OX=10090 GN=Cd180 PE=1 SV=2	1	11	21.6	74.302	661	0	180.5	0//0	1//0	0//0	161550000	23	24			-1	7024000	7024000	215900000	7.02372e+07	112.686	0.179612
sp|Q3UJB9-2|EDC4_MOUSE	Edc4	sp|Q3UJB9-2|EDC4_MOUSE;sp|Q3UJB9|EDC4_MOUSE	sp|Q3UJB9-2|EDC4_MOUSE;sp|Q3UJB9|EDC4_MOUSE	Isoform 2 of Enhancer of mRNA-decapping protein 4 OS=Mus musculus OX=10090 GN=Edc4;Enhancer of mRNA-decapping protein 4 OS=Mus musculus OX=10090 GN=Edc4 PE=1 SV=2	2	18	19.9	150.65	1390	0	303.76	0//0	1//0	0//0	378490000	54	39			-1;-1	7009000	7009000	473960000	1.35984e+08	112.446	0.179228
sp|Q921L5|COG2_MOUSE	Cog2	sp|Q921L5|COG2_MOUSE	sp|Q921L5|COG2_MOUSE	Conserved oligomeric Golgi complex subunit 2 OS=Mus musculus OX=10090 GN=Cog2 PE=1 SV=2	1	17	37.1	82.039	731	0	193.65	0//0	1//0	0//0	292960000	42	32			-1	6975300	6975300	375840000	9.92496e+07	111.905	0.178366
sp|Q99K23|UFSP2_MOUSE	Ufsp2	sp|Q99K23|UFSP2_MOUSE	sp|Q99K23|UFSP2_MOUSE	Ufm1-specific protease 2 OS=Mus musculus OX=10090 GN=Ufsp2 PE=1 SV=1	1	9	27.3	52.515	461	0	141.55	0//0	1//0	0//0	152570000	22	20			-1	6934900	6934900	198640000	6.73324e+07	111.257	0.177333
sp|Q9JLJ1|SELK_MOUSE	Selenok	sp|Q9JLJ1|SELK_MOUSE	sp|Q9JLJ1|SELK_MOUSE	Selenoprotein K OS=Mus musculus OX=10090 GN=Selenok PE=1 SV=3	1	2	52.1	10.642	94	0.00060643	17.075	0//0	1//0	0//0	41598000	6	2			-1	6933000	6933000	58057000	3.23305e+07	111.226	0.177285
sp|Q8R1I1|QCR9_MOUSE	Uqcr10	sp|Q8R1I1|QCR9_MOUSE	sp|Q8R1I1|QCR9_MOUSE	Cytochrome b-c1 complex subunit 9 OS=Mus musculus OX=10090 GN=Uqcr10 PE=1 SV=1	1	2	37.5	7.4454	64	0.0011614	14.383	0//0	1//0	0//0	27398000	4	6			-1	6849400	6849400	35613000	2.12938e+07	109.885	0.175147
sp|Q9D710|TMX2_MOUSE	Tmx2	sp|Q9D710|TMX2_MOUSE	sp|Q9D710|TMX2_MOUSE	Thioredoxin-related transmembrane protein 2 OS=Mus musculus OX=10090 GN=Tmx2 PE=1 SV=1	1	5	23.4	33.942	295	0	93.441	0//0	1//0	0//0	115500000	17	11			-1	6794000	6794000	148280000	7.37774e+07	108.996	0.17373
sp|Q921M7|CYRIB_MOUSE	Cyrib	sp|Q921M7|CYRIB_MOUSE	sp|Q921M7|CYRIB_MOUSE	CYFIP-related Rac1 interactor B OS=Mus musculus OX=10090 GN=Cyrib PE=1 SV=1	1	6	22.8	36.776	324	0	93.093	0//0	1//0	0//0	129020000	19	11			-1	6790400	6790400	166640000	7.55336e+07	108.939	0.173638
sp|Q91XC9|PEX16_MOUSE	Pex16	sp|Q91XC9|PEX16_MOUSE	sp|Q91XC9|PEX16_MOUSE	Peroxisomal membrane protein PEX16 OS=Mus musculus OX=10090 GN=Pex16 PE=1 SV=2	1	2	5.7	38.677	336	0.0011204	12.957	0//0	1//0	0//0	107970000	16	3			-1	6748300	6748300	141030000	8.39178e+07	108.263	0.172562
sp|Q6PD26|PIGS_MOUSE	Pigs	sp|Q6PD26|PIGS_MOUSE	sp|Q6PD26|PIGS_MOUSE	GPI transamidase component PIG-S OS=Mus musculus OX=10090 GN=Pigs PE=1 SV=3	1	11	36.4	61.71	555	0	131.82	0//0	1//0	0//0	202420000	30	31			-1	6747400	6747400	267080000	6.69572e+07	108.249	0.172539
sp|Q9CPZ6|ORML3_MOUSE	Ormdl3	sp|Q9CPZ6|ORML3_MOUSE	sp|Q9CPZ6|ORML3_MOUSE	ORM1-like protein 3 OS=Mus musculus OX=10090 GN=Ormdl3 PE=2 SV=1	1	2	21.6	17.476	153	0	39.586	0//0	1//0	0//0	40008000	6	3			-1	6668100	6668100	51883000	3.10952e+07	106.976	0.170511
sp|P49817|CAV1_MOUSE	Cav1	sp|P49817|CAV1_MOUSE;sp|P49817-2|CAV1_MOUSE;sp|P51637|CAV3_MOUSE	sp|P49817|CAV1_MOUSE;sp|P49817-2|CAV1_MOUSE;sp|P51637|CAV3_MOUSE	Caveolin-1 OS=Mus musculus OX=10090 GN=Cav1 PE=1 SV=1;Isoform 2 of Caveolin-1 OS=Mus musculus OX=10090 GN=Cav1;Caveolin-3 OS=Mus musculus OX=10090 GN=Cav3 PE=1 SV=1	3	2	10.7	20.538	178	0.0021763	11.925	0//0	1//0	0//0	66025000	10	3			-1;-1;-1	6602500	6602500	83708000	5.13151e+07	105.924	0.168833
sp|Q91XE8|TM205_MOUSE	Tmem205	sp|Q91XE8|TM205_MOUSE	sp|Q91XE8|TM205_MOUSE	Transmembrane protein 205 OS=Mus musculus OX=10090 GN=Tmem205 PE=1 SV=1	1	2	10.1	21.18	189	0	19.699	0//0	1//0	0//0	46189000	7	4			-1	6598400	6598400	63582000	3.58981e+07	105.858	0.168729
sp|Q9JHS3|LTOR2_MOUSE	Lamtor2	sp|Q9JHS3|LTOR2_MOUSE	sp|Q9JHS3|LTOR2_MOUSE	Ragulator complex protein LAMTOR2 OS=Mus musculus OX=10090 GN=Lamtor2 PE=1 SV=1	1	4	36.8	13.48	125	0	66.656	0//0	1//0	0//0	39520000	6	10			-1	6586700	6586700	51899000	3.07159e+07	105.671	0.168429
sp|Q9EP72|EMC7_MOUSE	Emc7	sp|Q9EP72|EMC7_MOUSE	sp|Q9EP72|EMC7_MOUSE	ER membrane protein complex subunit 7 OS=Mus musculus OX=10090 GN=Emc7 PE=1 SV=1	1	4	32.4	26.31	241	0	30.525	0//0	1//0	0//0	58819000	9	6			-1	6535500	6535500	75028000	4.15266e+07	104.849	0.16712
sp|Q9Z160|COG1_MOUSE	Cog1	sp|Q9Z160|COG1_MOUSE	sp|Q9Z160|COG1_MOUSE	Conserved oligomeric Golgi complex subunit 1 OS=Mus musculus OX=10090 GN=Cog1 PE=1 SV=3	1	16	24.6	109.05	980	0	255.04	0//0	1//0	0//0	352220000	54	44			-1	6522600	6522600	454120000	1.2123e+08	104.642	0.16679
sp|P28078|DMA_MOUSE	H2-DMa	sp|P28078|DMA_MOUSE	sp|P28078|DMA_MOUSE	Class II histocompatibility antigen, M alpha chain OS=Mus musculus OX=10090 GN=H2-DMa PE=1 SV=1	1	2	15.7	28.95	261	0	18.612	0//0	1//0	0//0	32383000	5	4			-1	6476600	6476600	41732000	2.51688e+07	103.904	0.165614
sp|Q9ES97-3|RTN3_MOUSE	Rtn3	sp|Q9ES97-3|RTN3_MOUSE;sp|Q9ES97-4|RTN3_MOUSE;sp|Q9ES97-5|RTN3_MOUSE;sp|Q9ES97-2|RTN3_MOUSE;sp|Q9ES97|RTN3_MOUSE	sp|Q9ES97-3|RTN3_MOUSE;sp|Q9ES97-4|RTN3_MOUSE;sp|Q9ES97-5|RTN3_MOUSE;sp|Q9ES97-2|RTN3_MOUSE;sp|Q9ES97|RTN3_MOUSE	Isoform 3 of Reticulon-3 OS=Mus musculus OX=10090 GN=Rtn3;Isoform 4 of Reticulon-3 OS=Mus musculus OX=10090 GN=Rtn3;Isoform 5 of Reticulon-3 OS=Mus musculus OX=10090 GN=Rtn3;Isoform 2 of Reticulon-3 OS=Mus musculus OX=10090 GN=Rtn3;Reticulon-3 OS=Mus muscu	5	3	27.8	25.428	237	0	38.75	0//0	1//0	0//0	38838000	6	6			-1;-1;-1;-1;-1	6473000	6473000	49143000	3.01855e+07	103.846	0.165522
sp|P56528|CD38_MOUSE	Cd38	sp|P56528|CD38_MOUSE	sp|P56528|CD38_MOUSE	ADP-ribosyl cyclase/cyclic ADP-ribose hydrolase 1 OS=Mus musculus OX=10090 GN=Cd38 PE=1 SV=2	1	3	13.8	34.407	304	0	157.26	0//0	1//0	0//0	103550000	16	12			-1	6471800	6471800	130650000	8.048e+07	103.827	0.165491
sp|Q60634-3|FLOT2_MOUSE	Flot2	sp|Q60634-3|FLOT2_MOUSE;sp|Q60634-2|FLOT2_MOUSE;sp|Q60634|FLOT2_MOUSE	sp|Q60634-3|FLOT2_MOUSE;sp|Q60634-2|FLOT2_MOUSE;sp|Q60634|FLOT2_MOUSE	Isoform 3 of Flotillin-2 OS=Mus musculus OX=10090 GN=Flot2;Isoform 2 of Flotillin-2 OS=Mus musculus OX=10090 GN=Flot2;Flotillin-2 OS=Mus musculus OX=10090 GN=Flot2 PE=1 SV=2	3	12	39.1	41.658	379	0	149.07	0//0	1//0	0//0	152700000	24	18			-1;-1;-1	6362500	6362500	194300000	4.73107e+07	102.074	0.162696
sp|P35564|CALX_MOUSE	Canx	sp|P35564|CALX_MOUSE	sp|P35564|CALX_MOUSE	Calnexin OS=Mus musculus OX=10090 GN=Canx PE=1 SV=1	1	8	19.8	67.277	591	0	75.636	0//0	1//0	1//0	148600000	24	19			-1	6191600	6191600	190090000	8.14066e+07	99.3319	0.158326
sp|Q8BU31|RAP2C_MOUSE	Rap2c	sp|Q8BU31|RAP2C_MOUSE	sp|Q8BU31|RAP2C_MOUSE	Ras-related protein Rap-2c OS=Mus musculus OX=10090 GN=Rap2c PE=1 SV=1	1	4	34.4	20.745	183	0	56.787	0//0	1//0	0//0	74270000	12	11			-1	6189200	6189200	96342000	5.21351e+07	99.2934	0.158265
sp|Q9D023|MPC2_MOUSE	Mpc2	sp|Q9D023|MPC2_MOUSE	sp|Q9D023|MPC2_MOUSE	Mitochondrial pyruvate carrier 2 OS=Mus musculus OX=10090 GN=Mpc2 PE=1 SV=1	1	2	18.1	14.286	127	0.0021954	12.259	0//0	1//0	0//0	49512000	8	8			-1	6188900	6188900	62061000	3.84809e+07	99.2886	0.158257
sp|Q9CQH3|NDUB5_MOUSE	Ndufb5	sp|Q9CQH3|NDUB5_MOUSE	sp|Q9CQH3|NDUB5_MOUSE	NADH dehydrogenase [ubiquinone] 1 beta subcomplex subunit 5, mitochondrial OS=Mus musculus OX=10090 GN=Ndufb5 PE=1 SV=1	1	3	15.9	21.71	189	0	26.445	0//0	1//0	0//0	55058000	9	7			-1	6117600	6117600	72351000	4.27917e+07	98.1448	0.156434
sp|P34022|RANG_MOUSE	Ranbp1	sp|P34022|RANG_MOUSE	sp|P34022|RANG_MOUSE	Ran-specific GTPase-activating protein OS=Mus musculus OX=10090 GN=Ranbp1 PE=1 SV=2	1	4	31.5	23.596	203	0	28.879	0//0	1//0	0//0	36521000	6	4			-1	6086800	6086800	43733000	2.35327e+07	97.6506	0.155646
sp|Q9D8Y7|TP8L2_MOUSE	Tnfaip8l2	sp|Q9D8Y7|TP8L2_MOUSE	sp|Q9D8Y7|TP8L2_MOUSE	Tumor necrosis factor alpha-induced protein 8-like protein 2 OS=Mus musculus OX=10090 GN=Tnfaip8l2 PE=1 SV=1	1	2	18.5	20.615	184	0	38.731	0//0	1//0	0//0	48241000	8	6			-1	6030100	6030100	62312000	3.74933e+07	96.741	0.154197
sp|O08579|EMD_MOUSE	Emd	sp|O08579|EMD_MOUSE	sp|O08579|EMD_MOUSE	Emerin OS=Mus musculus OX=10090 GN=Emd PE=1 SV=1	1	4	37.8	29.435	259	0	44.681	0//0	1//0	0//0	66320000	11	10			-1	6029100	6029100	82118000	4.93074e+07	96.725	0.154171
sp|P01831|THY1_MOUSE	Thy1	sp|P01831|THY1_MOUSE	sp|P01831|THY1_MOUSE	Thy-1 membrane glycoprotein OS=Mus musculus OX=10090 GN=Thy1 PE=1 SV=1	1	3	22.2	18.08	162	0	37.72	0//0	1//0	0//0	41608000	7	5			-1	5943900	5943900	55767000	3.23379e+07	95.3581	0.151992
sp|Q8C3X2|CC90B_MOUSE	Ccdc90b	sp|Q8C3X2|CC90B_MOUSE;sp|Q8C3X2-2|CC90B_MOUSE	sp|Q8C3X2|CC90B_MOUSE;sp|Q8C3X2-2|CC90B_MOUSE	Coiled-coil domain-containing protein 90B, mitochondrial OS=Mus musculus OX=10090 GN=Ccdc90b PE=1 SV=1;Isoform 2 of Coiled-coil domain-containing protein 90B, mitochondrial OS=Mus musculus OX=10090 GN=Ccdc90b	2	7	28.9	29.596	256	0	61.596	0//0	1//0	0//0	106600000	18	19			-1;-1	5922000	5922000	136640000	4.76308e+07	95.0068	0.151432
sp|Q9D883|U2AF1_MOUSE	U2af1	sp|Q9D883|U2AF1_MOUSE;sp|Q8BGJ9|U2AF4_MOUSE;sp|Q8BGJ9-4|U2AF4_MOUSE;sp|Q8BGJ9-2|U2AF4_MOUSE;sp|Q8BGJ9-3|U2AF4_MOUSE	sp|Q9D883|U2AF1_MOUSE	Splicing factor U2AF 35 kDa subunit OS=Mus musculus OX=10090 GN=U2af1 PE=1 SV=4	5	5	27.6	27.815	239	0	40.998	0//0	1//0	0//0	64838000	11	11			-1;-1;-1;-1;-1	5894300	5894300	84180000	4.05843e+07	94.5624	0.150724
sp|Q5U458|DJC11_MOUSE	Dnajc11	sp|Q5U458|DJC11_MOUSE	sp|Q5U458|DJC11_MOUSE	DnaJ homolog subfamily C member 11 OS=Mus musculus OX=10090 GN=Dnajc11 PE=1 SV=2	1	8	18.6	63.232	559	0	108.58	0//0	1//0	0//0	151670000	27	18			-1	5617400	5617400	196950000	8.18967e+07	90.12	0.143643
sp|Q8K0G5|EIPR1_MOUSE	Eipr1	sp|Q8K0G5|EIPR1_MOUSE	sp|Q8K0G5|EIPR1_MOUSE	EARP and GARP complex-interacting protein 1 OS=Mus musculus OX=10090 GN=Eipr1 PE=1 SV=2	1	5	17.1	43.126	386	0	37.445	0//0	1//0	0//0	77984000	14	10			-1	5570300	5570300	104400000	4.18485e+07	89.3644	0.142439
sp|P62835|RAP1A_MOUSE	Rap1a	sp|P62835|RAP1A_MOUSE;sp|P35276|RAB3D_MOUSE	sp|P62835|RAP1A_MOUSE	Ras-related protein Rap-1A OS=Mus musculus OX=10090 GN=Rap1a PE=1 SV=1	2	3	60.3	20.987	184	0	37.522	0//1	1//0	0//1	55558000	10	4			-1;-1	5555800	5555800	70804000	4.31803e+07	89.1318	0.142068
sp|Q80VQ0|AL3B1_MOUSE	Aldh3b1	sp|Q80VQ0|AL3B1_MOUSE;sp|J3QMK6|AL3B3_MOUSE	sp|Q80VQ0|AL3B1_MOUSE	Aldehyde dehydrogenase family 3 member B1 OS=Mus musculus OX=10090 GN=Aldh3b1 PE=1 SV=1	2	8	25	52.292	468	0	122.67	0//0	1//0	0//0	127480000	23	19			-1;-1	5542500	5542500	169310000	6.25994e+07	88.9184	0.141728
sp|Q8CCJ3|UFL1_MOUSE	Ufl1	sp|Q8CCJ3|UFL1_MOUSE;sp|Q8CCJ3-1|UFL1_MOUSE;sp|Q8CCJ3-2|UFL1_MOUSE	sp|Q8CCJ3|UFL1_MOUSE;sp|Q8CCJ3-1|UFL1_MOUSE	E3 UFM1-protein ligase 1 OS=Mus musculus OX=10090 GN=Ufl1 PE=1 SV=2;Isoform 2 of E3 UFM1-protein ligase 1 OS=Mus musculus OX=10090 GN=Ufl1	3	14	22.1	89.519	793	0	178.65	0//0	1//0	0//0	249170000	45	28			-1;-1;-1	5537200	5537200	316080000	9.52527e+07	88.8334	0.141593
sp|O70439|STX7_MOUSE	Stx7	sp|O70439|STX7_MOUSE	sp|O70439|STX7_MOUSE	Syntaxin-7 OS=Mus musculus OX=10090 GN=Stx7 PE=1 SV=3	1	6	26.1	29.82	261	0	110.2	0//0	1//0	0//0	65517000	12	11			-1	5459700	5459700	84028000	3.43282e+07	87.5901	0.139611
sp|Q8BXQ2|PIGT_MOUSE	Pigt	sp|Q8BXQ2|PIGT_MOUSE	sp|Q8BXQ2|PIGT_MOUSE	GPI transamidase component PIG-T OS=Mus musculus OX=10090 GN=Pigt PE=1 SV=2	1	6	12.4	65.704	582	0	111.14	0//0	1//0	0//0	141100000	26	16			-1	5427100	5427100	179530000	7.78028e+07	87.0671	0.138777
sp|Q9R0Q9|MPU1_MOUSE	Mpdu1	sp|Q9R0Q9|MPU1_MOUSE	sp|Q9R0Q9|MPU1_MOUSE	Mannose-P-dolichol utilization defect 1 protein OS=Mus musculus OX=10090 GN=Mpdu1 PE=1 SV=1	1	2	8.1	26.497	247	0.0011364	13.527	0//0	1//0	0//0	31891000	6	4			-1	5315100	5315100	41512000	2.47855e+07	85.2702	0.135913
sp|Q9CR64-2|KISHA_MOUSE	Tmem167a	sp|Q9CR64-2|KISHA_MOUSE;sp|Q9CR64|KISHA_MOUSE	sp|Q9CR64-2|KISHA_MOUSE;sp|Q9CR64|KISHA_MOUSE	Isoform 2 of Protein kish-A OS=Mus musculus OX=10090 GN=Tmem167a;Protein kish-A OS=Mus musculus OX=10090 GN=Tmem167a PE=1 SV=1	2	2	30	6.775	60	0.0011154	12.863	0//0	1//0	0//0	21094000	4	4			-1;-1	5273500	5273500	26493000	1.63944e+07	84.6029	0.134849
sp|Q80UU9|PGRC2_MOUSE	Pgrmc2	sp|Q80UU9|PGRC2_MOUSE	sp|Q80UU9|PGRC2_MOUSE	Membrane-associated progesterone receptor component 2 OS=Mus musculus OX=10090 GN=Pgrmc2 PE=1 SV=2	1	4	30.4	23.334	217	0	43.833	0//0	1//0	0//0	56756000	11	6			-1	5159700	5159700	74759000	3.88782e+07	82.7772	0.131939
sp|Q9D173|TOM7_MOUSE	Tomm7	sp|Q9D173|TOM7_MOUSE	sp|Q9D173|TOM7_MOUSE	Mitochondrial import receptor subunit TOM7 homolog OS=Mus musculus OX=10090 GN=Tomm7 PE=3 SV=1	1	2	56.4	6.1773	55	0.00060132	16.261	0//0	1//0	0//0	15437000	3	3			-1	5145500	5145500	19295000	1.19975e+07	82.5493	0.131576
sp|P21958|TAP1_MOUSE	Tap1	sp|P21958|TAP1_MOUSE	sp|P21958|TAP1_MOUSE	Antigen peptide transporter 1 OS=Mus musculus OX=10090 GN=Tap1 PE=1 SV=3	1	9	20.6	78.863	724	0	146.22	0//0	1//0	0//0	153690000	30	17			-1	5122900	5122900	196570000	8.14027e+07	82.1868	0.130998
sp|P61021|RAB5B_MOUSE	Rab5b	sp|P61021|RAB5B_MOUSE	sp|P61021|RAB5B_MOUSE	Ras-related protein Rab-5B OS=Mus musculus OX=10090 GN=Rab5b PE=1 SV=1	1	3	23.3	23.707	215	0	31.749	0//0	1//0	0//0	56095000	11	6			-1	5099600	5099600	72947000	4.35981e+07	81.813	0.130403
sp|Q91VC9|GHITM_MOUSE	Ghitm	sp|Q91VC9|GHITM_MOUSE	sp|Q91VC9|GHITM_MOUSE	Growth hormone-inducible transmembrane protein OS=Mus musculus OX=10090 GN=Ghitm PE=1 SV=1	1	2	6.1	37.275	346	0.0011186	12.917	0//0	1//0	0//0	55415000	11	4			-1	5037700	5037700	71491000	4.30688e+07	80.8199	0.12882
sp|P21956-2|MFGM_MOUSE	Mfge8	sp|P21956-2|MFGM_MOUSE;sp|P21956|MFGM_MOUSE	sp|P21956-2|MFGM_MOUSE;sp|P21956|MFGM_MOUSE	Isoform 2 of Lactadherin OS=Mus musculus OX=10090 GN=Mfge8;Lactadherin OS=Mus musculus OX=10090 GN=Mfge8 PE=1 SV=3	2	12	35.2	47.169	426	0	97.689	0//0	1//0	0//0	104590000	21	15			-1;-1	4980300	4980300	129530000	4.02301e+07	79.899	0.127352
sp|Q61941|NNTM_MOUSE	Nnt	sp|Q61941|NNTM_MOUSE	sp|Q61941|NNTM_MOUSE	NAD(P) transhydrogenase, mitochondrial OS=Mus musculus OX=10090 GN=Nnt PE=1 SV=2	1	13	18.1	113.84	1086	0	111.3	0//0	1//0	0//0	203040000	41	27			-1	4952100	4952100	263080000	7.01139e+07	79.4466	0.126631
sp|Q99J56|DERL1_MOUSE	Derl1	sp|Q99J56|DERL1_MOUSE	sp|Q99J56|DERL1_MOUSE	Derlin-1 OS=Mus musculus OX=10090 GN=Derl1 PE=1 SV=1	1	2	7.6	28.834	251	0	18.697	0//0	1//0	0//0	48118000	10	4			-1	4811800	4811800	62228000	3.73979e+07	77.1958	0.123043
sp|Q3UMR5|MCU_MOUSE	Mcu	sp|Q3UMR5|MCU_MOUSE;sp|Q3UMR5-2|MCU_MOUSE	sp|Q3UMR5|MCU_MOUSE	Calcium uniporter protein, mitochondrial OS=Mus musculus OX=10090 GN=Mcu PE=1 SV=2	2	6	22	39.681	350	0	61.325	0//0	1//0	0//0	79049000	17	14			-1;-1	4650000	4650000	95770000	4.9459e+07	74.6	0.118906
sp|P15530|CD79B_MOUSE	Cd79b	sp|P15530|CD79B_MOUSE	sp|P15530|CD79B_MOUSE	B-cell antigen receptor complex-associated protein beta chain OS=Mus musculus OX=10090 GN=Cd79b PE=1 SV=1	1	3	11	25.726	228	0	21.484	0//0	1//0	0//0	32315000	7	6			-1	4616400	4616400	40373000	2.51155e+07	74.061	0.118047
sp|P97363|SPTC2_MOUSE	Sptlc2	sp|P97363|SPTC2_MOUSE	sp|P97363|SPTC2_MOUSE	Serine palmitoyltransferase 2 OS=Mus musculus OX=10090 GN=Sptlc2 PE=1 SV=2	1	11	21.2	62.981	560	0	200.97	0//0	1//0	0//0	141230000	31	23			-1	4555900	4555900	175420000	5.3533e+07	73.0904	0.1165
sp|Q8VBT0|TMX1_MOUSE	Tmx1	sp|Q8VBT0|TMX1_MOUSE	sp|Q8VBT0|TMX1_MOUSE	Thioredoxin-related transmembrane protein 1 OS=Mus musculus OX=10090 GN=Tmx1 PE=1 SV=1	1	3	11.9	31.395	278	0	28.169	0//0	1//0	0//0	45459000	10	8			-1	4545900	4545900	59404000	3.53315e+07	72.93	0.116244
sp|Q6PHN9|RAB35_MOUSE	Rab35	sp|Q6PHN9|RAB35_MOUSE	sp|Q6PHN9|RAB35_MOUSE	Ras-related protein Rab-35 OS=Mus musculus OX=10090 GN=Rab35 PE=1 SV=1	1	4	29.9	23.025	201	0	62.434	0//0	1//0	0//0	54382000	12	9			-1	4531800	4531800	68111000	3.46912e+07	72.7037	0.115883
sp|Q9ET30|TM9S3_MOUSE	Tm9sf3	sp|Q9ET30|TM9S3_MOUSE	sp|Q9ET30|TM9S3_MOUSE	Transmembrane 9 superfamily member 3 OS=Mus musculus OX=10090 GN=Tm9sf3 PE=1 SV=1	1	5	12.4	67.544	587	0	62.914	0//0	1//0	0//0	84771000	19	14			-1	4461600	4461600	107200000	5.396e+07	71.5775	0.114088
sp|Q9CXY9|GPI8_MOUSE	Pigk	sp|Q9CXY9|GPI8_MOUSE	sp|Q9CXY9|GPI8_MOUSE	GPI-anchor transamidase OS=Mus musculus OX=10090 GN=Pigk PE=1 SV=2	1	5	19.2	44.895	395	0	35.167	0//0	1//0	0//0	89175000	20	8			-1	4458800	4458800	116320000	6.42398e+07	71.5326	0.114017
sp|P39054-2|DYN2_MOUSE	Dnm2	sp|P39054-2|DYN2_MOUSE;sp|P39054|DYN2_MOUSE;sp|P39053-5|DYN1_MOUSE;sp|P39053-3|DYN1_MOUSE;sp|P39053-6|DYN1_MOUSE;sp|P39053-4|DYN1_MOUSE;sp|P39053|DYN1_MOUSE	sp|P39054-2|DYN2_MOUSE;sp|P39054|DYN2_MOUSE	Isoform 2 of Dynamin-2 OS=Mus musculus OX=10090 GN=Dnm2;Dynamin-2 OS=Mus musculus OX=10090 GN=Dnm2 PE=1 SV=2	7	5	6.9	97.732	866	0	38.831	0//0	1//0	0//0	204840000	46	8			-1;-1;-1;-1;-1;-1;-1	4453100	4453100	303090000	1.55532e+08	71.4412	0.113871
sp|Q9QYI4|DJB12_MOUSE	Dnajb12	sp|Q9QYI4|DJB12_MOUSE	sp|Q9QYI4|DJB12_MOUSE	DnaJ homolog subfamily B member 12 OS=Mus musculus OX=10090 GN=Dnajb12 PE=1 SV=2	1	6	16.8	41.987	376	0	46.904	0//0	1//0	0//0	70340000	16	12			-1	4396300	4396300	88518000	3.9345e+07	70.5299	0.112418
sp|Q8BSL7|ARF2_MOUSE	Arf2	sp|Q8BSL7|ARF2_MOUSE	sp|Q8BSL7|ARF2_MOUSE	ADP-ribosylation factor 2 OS=Mus musculus OX=10090 GN=Arf2 PE=1 SV=2	1	4	65.2	20.746	181	0	38.359	0//1	1//0	0//1	43857000	10	11			-1	4385700	4385700	57127000	3.05648e+07	70.3599	0.112147
sp|Q64373-2|B2CL1_MOUSE	Bcl2l1	sp|Q64373-2|B2CL1_MOUSE;sp|Q64373-3|B2CL1_MOUSE;sp|Q64373-4|B2CL1_MOUSE;sp|Q64373|B2CL1_MOUSE	sp|Q64373-2|B2CL1_MOUSE;sp|Q64373-3|B2CL1_MOUSE;sp|Q64373-4|B2CL1_MOUSE;sp|Q64373|B2CL1_MOUSE	Isoform Bcl-X(S) of Bcl-2-like protein 1 OS=Mus musculus OX=10090 GN=Bcl2l1;Isoform Bcl-X(beta) of Bcl-2-like protein 1 OS=Mus musculus OX=10090 GN=Bcl2l1;Isoform Bcl-X(delta-TM) of Bcl-2-like protein 1 OS=Mus musculus OX=10090 GN=Bcl2l1;Bcl-2-like protein	4	2	11.2	18.961	170	0.0011862	15.432	0//0	1//0	0//0	26314000	6	4			-1;-1;-1;-1	4385700	4385700	33553000	2.04517e+07	70.3599	0.112147
sp|P10417-2|BCL2_MOUSE	Bcl2	sp|P10417-2|BCL2_MOUSE;sp|P10417|BCL2_MOUSE	sp|P10417-2|BCL2_MOUSE;sp|P10417|BCL2_MOUSE	Isoform Beta of Apoptosis regulator Bcl-2 OS=Mus musculus OX=10090 GN=Bcl2;Apoptosis regulator Bcl-2 OS=Mus musculus OX=10090 GN=Bcl2 PE=1 SV=3	2	2	22.1	22.281	199	0.0011799	15.207	0//0	1//0	0//0	34901000	8	5			-1;-1	4362600	4362600	45315000	2.71258e+07	69.9893	0.111557
sp|P29387|GBB4_MOUSE	Gnb4	sp|P29387|GBB4_MOUSE	sp|P29387|GBB4_MOUSE	Guanine nucleotide-binding protein subunit beta-4 OS=Mus musculus OX=10090 GN=Gnb4 PE=1 SV=4	1	4	47.1	37.379	340	0	58.458	0//1	1//0	0//1	60573000	14	6			-1	4326600	4326600	80059000	4.70772e+07	69.4117	0.110636
sp|P21126|UBL4A_MOUSE	Ubl4a	sp|P21126|UBL4A_MOUSE	sp|P21126|UBL4A_MOUSE	Ubiquitin-like protein 4A OS=Mus musculus OX=10090 GN=Ubl4a PE=1 SV=1	1	4	26.8	17.8	157	0	28.886	0//0	1//0	0//0	38679000	9	7			-1	4297700	4297700	51071000	2.82685e+07	68.9481	0.109897
sp|Q9R112|SQOR_MOUSE	Sqor	sp|Q9R112|SQOR_MOUSE	sp|Q9R112|SQOR_MOUSE	Sulfide:quinone oxidoreductase, mitochondrial OS=Mus musculus OX=10090 GN=Sqor PE=1 SV=3	1	9	24.2	50.282	450	0	96.2	0//0	1//0	1//0	124630000	29	19			-1	4297500	4297500	165000000	5.53835e+07	68.9449	0.109892
sp|Q62086|PON2_MOUSE	Pon2	sp|Q62086|PON2_MOUSE	sp|Q62086|PON2_MOUSE	Serum paraoxonase/arylesterase 2 OS=Mus musculus OX=10090 GN=Pon2 PE=1 SV=2	1	4	18.9	39.617	354	0	38.829	0//0	1//0	0//0	55722000	13	11			-1	4286300	4286300	70617000	3.91851e+07	68.7652	0.109606
sp|Q8K2C7-2|OS9_MOUSE	Os9	sp|Q8K2C7-2|OS9_MOUSE;sp|Q8K2C7|OS9_MOUSE	sp|Q8K2C7-2|OS9_MOUSE;sp|Q8K2C7|OS9_MOUSE	Isoform 2 of Protein OS-9 OS=Mus musculus OX=10090 GN=Os9;Protein OS-9 OS=Mus musculus OX=10090 GN=Os9 PE=1 SV=2	2	14	36.5	69.763	617	0	140.22	0//0	1//0	0//0	132780000	31	24			-1;-1	4283300	4283300	163530000	5.85296e+07	68.7171	0.109529
sp|Q9D1I2|CAR19_MOUSE	Card19	sp|Q9D1I2|CAR19_MOUSE	sp|Q9D1I2|CAR19_MOUSE	Caspase recruitment domain-containing protein 19 OS=Mus musculus OX=10090 GN=Card19 PE=1 SV=1	1	6	39.3	20.936	183	0	48.476	0//0	1//0	0//0	55419000	13	10			-1	4263000	4263000	71502000	3.14277e+07	68.3914	0.10901
sp|Q8VDP6|CDIPT_MOUSE	Cdipt	sp|Q8VDP6|CDIPT_MOUSE	sp|Q8VDP6|CDIPT_MOUSE	CDP-diacylglycerol--inositol 3-phosphatidyltransferase OS=Mus musculus OX=10090 GN=Cdipt PE=1 SV=1	1	2	9.9	23.599	213	0.00061275	17.599	0//0	1//0	0//0	38345000	9	6			-1	4260600	4260600	53938000	2.98025e+07	68.3529	0.108948
sp|P70302|STIM1_MOUSE	Stim1	sp|P70302|STIM1_MOUSE	sp|P70302|STIM1_MOUSE	Stromal interaction molecule 1 OS=Mus musculus OX=10090 GN=Stim1 PE=1 SV=2	1	8	12.8	77.566	685	0	58.605	0//0	1//0	1//0	131420000	31	16			-1	4239400	4239400	157890000	6.62576e+07	68.0128	0.108406
sp|Q9CZ82|MED18_MOUSE	Med18	sp|Q9CZ82|MED18_MOUSE	sp|Q9CZ82|MED18_MOUSE	Mediator of RNA polymerase II transcription subunit 18 OS=Mus musculus OX=10090 GN=Med18 PE=1 SV=1	1	4	23.6	23.644	208	0	23.932	0//0	1//0	0//0	29396000	7	6			-1	4199400	4199400	38337000	2.05728e+07	67.371	0.107383
sp|Q9QZI9|SERC3_MOUSE	Serinc3	sp|Q9QZI9|SERC3_MOUSE	sp|Q9QZI9|SERC3_MOUSE	Serine incorporator 3 OS=Mus musculus OX=10090 GN=Serinc3 PE=1 SV=2	1	2	2.8	52.622	472	0	18.684	0//0	1//0	0//0	54512000	13	7			-1	4193200	4193200	70908000	4.2368e+07	67.2716	0.107225
sp|Q99L43|CDS2_MOUSE	Cds2	sp|Q99L43|CDS2_MOUSE	sp|Q99L43|CDS2_MOUSE	Phosphatidate cytidylyltransferase 2 OS=Mus musculus OX=10090 GN=Cds2 PE=1 SV=1	1	3	8.3	51.313	444	0	37.237	0//0	1//0	0//0	66602000	16	7			-1	4162600	4162600	83936000	5.17631e+07	66.7807	0.106442
sp|Q9D742|AP5S1_MOUSE	Ap5s1	sp|Q9D742|AP5S1_MOUSE	sp|Q9D742|AP5S1_MOUSE	AP-5 complex subunit sigma-1 OS=Mus musculus OX=10090 GN=Ap5s1 PE=1 SV=1	1	3	17.6	18.805	170	0	22.254	0//0	1//0	0//0	32681000	8	7			-1	4085100	4085100	42308000	2.53999e+07	65.5373	0.104461
sp|Q9D328|TM35A_MOUSE	Tmem35a	sp|Q9D328|TM35A_MOUSE	sp|Q9D328|TM35A_MOUSE	Transmembrane protein 35A OS=Mus musculus OX=10090 GN=Tmem35a PE=1 SV=1	1	2	9.6	18.505	167	0.00060277	16.545	0//0	1//0	0//0	28408000	7	5			-1	4058200	4058200	36364000	2.20788e+07	65.1058	0.103773
sp|Q9CQZ0|ORML2_MOUSE	Ormdl2	sp|Q9CQZ0|ORML2_MOUSE;sp|Q9CQZ0-2|ORML2_MOUSE;sp|Q921I0|ORML1_MOUSE	sp|Q9CQZ0|ORML2_MOUSE;sp|Q9CQZ0-2|ORML2_MOUSE;sp|Q921I0|ORML1_MOUSE	ORM1-like protein 2 OS=Mus musculus OX=10090 GN=Ormdl2 PE=1 SV=1;Isoform 2 of ORM1-like protein 2 OS=Mus musculus OX=10090 GN=Ormdl2;ORM1-like protein 1 OS=Mus musculus OX=10090 GN=Ormdl1 PE=2 SV=1	3	2	14.4	17.389	153	0	38.978	0//0	1//0	0//0	24024000	6	3			-1;-1;-1	4004000	4004000	36497000	1.86719e+07	64.2362	0.102387
sp|O54692|ZW10_MOUSE	Zw10	sp|O54692|ZW10_MOUSE	sp|O54692|ZW10_MOUSE	Centromere/kinetochore protein zw10 homolog OS=Mus musculus OX=10090 GN=Zw10 PE=1 SV=3	1	14	26.3	88.062	779	0	259.43	0//0	1//0	0//0	167440000	42	27			-1	3986800	3986800	209620000	6.26383e+07	63.9603	0.101947
sp|Q99P58|RB27B_MOUSE	Rab27b	sp|Q99P58|RB27B_MOUSE	sp|Q99P58|RB27B_MOUSE	Ras-related protein Rab-27B OS=Mus musculus OX=10090 GN=Rab27b PE=1 SV=3	1	3	17.4	24.56	218	0	19.326	0//0	1//0	0//0	51546000	13	5			-1	3965100	3965100	66270000	4.00619e+07	63.6122	0.101392
sp|O55106|STRN_MOUSE	Strn	sp|O55106|STRN_MOUSE	sp|O55106|STRN_MOUSE	Striatin OS=Mus musculus OX=10090 GN=Strn PE=1 SV=2	1	12	24.6	85.965	780	0	168	0//0	1//0	0//0	141850000	36	27			-1	3940300	3940300	178170000	5.50883e+07	63.2143	0.100758
sp|Q8C165|P20D1_MOUSE	Pm20d1	sp|Q8C165|P20D1_MOUSE	sp|Q8C165|P20D1_MOUSE	N-fatty-acyl-amino acid synthase/hydrolase PM20D1 OS=Mus musculus OX=10090 GN=Pm20d1 PE=1 SV=1	1	8	26	55.662	503	0	88.145	0//0	1//0	0//0	100950000	26	19			-1	3882600	3882600	129730000	4.54033e+07	62.2886	0.0992825
sp|Q9R0X0|MED20_MOUSE	Med20	sp|Q9R0X0|MED20_MOUSE;sp|Q9R0X0-2|MED20_MOUSE;sp|Q9R0X0-3|MED20_MOUSE	sp|Q9R0X0|MED20_MOUSE;sp|Q9R0X0-2|MED20_MOUSE	Mediator of RNA polymerase II transcription subunit 20 OS=Mus musculus OX=10090 GN=Med20 PE=1 SV=1;Isoform 2 of Mediator of RNA polymerase II transcription subunit 20 OS=Mus musculus OX=10090 GN=Med20	3	4	26.4	23.192	212	0	34.881	0//0	1//0	0//0	34922000	9	9			-1;-1;-1	3880200	3880200	45131000	2.47129e+07	62.2501	0.0992212
sp|P14439|HA23_MOUSE	H2-Ea	sp|P14439|HA23_MOUSE;sp|P04224|HA22_MOUSE;sp|P01904|HA21_MOUSE	sp|P14439|HA23_MOUSE;sp|P04224|HA22_MOUSE	H-2 class II histocompatibility antigen, E-U alpha chain OS=Mus musculus OX=10090 GN=H2-Ea PE=2 SV=2;H-2 class II histocompatibility antigen, E-K alpha chain OS=Mus musculus OX=10090 PE=1 SV=1	3	5	34.1	29.107	255	0	94.381	0//0	1//0	0//0	54188000	14	13			-1;-1;-1	3870600	3870600	67227000	3.04868e+07	62.0961	0.0989757
sp|Q6P5F7-2|TTYH3_MOUSE	Ttyh3	sp|Q6P5F7-2|TTYH3_MOUSE;sp|Q6P5F7|TTYH3_MOUSE	sp|Q6P5F7-2|TTYH3_MOUSE;sp|Q6P5F7|TTYH3_MOUSE	Isoform 2 of Protein tweety homolog 3 OS=Mus musculus OX=10090 GN=Ttyh3;Protein tweety homolog 3 OS=Mus musculus OX=10090 GN=Ttyh3 PE=1 SV=1	2	6	14.8	52.759	479	0	56.942	0//0	1//0	0//0	54026000	14	15			-1;-1	3859000	3859000	67461000	3.8509e+07	61.91	0.098679
sp|Q921J2|RHEB_MOUSE	Rheb	sp|Q921J2|RHEB_MOUSE	sp|Q921J2|RHEB_MOUSE	GTP-binding protein Rheb OS=Mus musculus OX=10090 GN=Rheb PE=1 SV=1	1	3	14.7	20.451	184	0	31.031	0//0	1//0	0//0	34362000	9	8			-1	3818000	3818000	43131000	2.67066e+07	61.2522	0.0976306
sp|Q925I1|ATAD3_MOUSE	Atad3	sp|Q925I1|ATAD3_MOUSE;sp|Q925I1-2|ATAD3_MOUSE	sp|Q925I1|ATAD3_MOUSE;sp|Q925I1-2|ATAD3_MOUSE	ATPase family AAA domain-containing protein 3 OS=Mus musculus OX=10090 GN=Atad3 PE=1 SV=1;Isoform 2 of ATPase family AAA domain-containing protein 3 OS=Mus musculus OX=10090 GN=Atad3	2	10	19.8	66.741	591	0	86.459	0//0	1//0	0//0	132610000	35	20			-1;-1	3789000	3789000	170380000	4.98825e+07	60.787	0.0968891
sp|Q9Z1R2|BAG6_MOUSE	Bag6	sp|Q9Z1R2|BAG6_MOUSE	sp|Q9Z1R2|BAG6_MOUSE	Large proline-rich protein BAG6 OS=Mus musculus OX=10090 GN=Bag6 PE=1 SV=1	1	14	16.5	121.04	1154	0	112.73	0//0	1//0	0//0	113550000	30	25			-1	3785200	3785200	146980000	3.83086e+07	60.726	0.0967919
sp|Q9D5T0|ATAD1_MOUSE	Atad1	sp|Q9D5T0|ATAD1_MOUSE	sp|Q9D5T0|ATAD1_MOUSE	Outer mitochondrial transmembrane helix translocase OS=Mus musculus OX=10090 GN=Atad1 PE=1 SV=1	1	4	18.6	40.744	361	0	39.103	0//0	1//0	0//0	63571000	17	9			-1	3739500	3739500	79963000	4.06145e+07	59.9929	0.0956233
sp|Q8VCM8|NCLN_MOUSE	Ncln	sp|Q8VCM8|NCLN_MOUSE	sp|Q8VCM8|NCLN_MOUSE	Nicalin OS=Mus musculus OX=10090 GN=Ncln PE=1 SV=2	1	7	14.2	62.907	563	0	64.397	0//0	1//0	0//0	80996000	22	15			-1	3681600	3681600	110170000	4.08866e+07	59.064	0.0941427
sp|Q5KU39|VPS41_MOUSE	Vps41	sp|Q5KU39|VPS41_MOUSE	sp|Q5KU39|VPS41_MOUSE	Vacuolar protein sorting-associated protein 41 homolog OS=Mus musculus OX=10090 GN=Vps41 PE=1 SV=1	1	13	20.8	98.601	853	0	101.12	0//0	1//0	0//0	160940000	44	18			-1	3657700	3657700	208910000	4.8532e+07	58.6805	0.0935316
sp|O35648|CETN3_MOUSE	Cetn3	sp|O35648|CETN3_MOUSE	sp|O35648|CETN3_MOUSE	Centrin-3 OS=Mus musculus OX=10090 GN=Cetn3 PE=1 SV=1	1	2	15	19.519	167	0	24.175	0//0	1//0	0//0	40229000	11	4			-1	3657200	3657200	54656000	3.12667e+07	58.6725	0.0935188
sp|Q91VU0|FAM3C_MOUSE	Fam3c	sp|Q91VU0|FAM3C_MOUSE	sp|Q91VU0|FAM3C_MOUSE	Protein FAM3C OS=Mus musculus OX=10090 GN=Fam3c PE=1 SV=1	1	2	9.7	24.752	227	0.0011608	14.374	0//0	1//0	0//0	47540000	13	3			-1	3656900	3656900	62475000	3.69488e+07	58.6677	0.0935111
sp|Q9D8V0-3|HM13_MOUSE	Hm13	sp|Q9D8V0-3|HM13_MOUSE;sp|Q9D8V0|HM13_MOUSE;sp|Q9D8V0-4|HM13_MOUSE;sp|Q9D8V0-2|HM13_MOUSE	sp|Q9D8V0-3|HM13_MOUSE;sp|Q9D8V0|HM13_MOUSE;sp|Q9D8V0-4|HM13_MOUSE;sp|Q9D8V0-2|HM13_MOUSE	Isoform 3 of Minor histocompatibility antigen H13 OS=Mus musculus OX=10090 GN=Hm13;Minor histocompatibility antigen H13 OS=Mus musculus OX=10090 GN=Hm13 PE=1 SV=1;Isoform 4 of Minor histocompatibility antigen H13 OS=Mus musculus OX=10090 GN=Hm13;Isoform 2	4	2	5.8	41.337	378	0.001171	14.815	0//0	1//0	0//0	39912000	11	4			-1;-1;-1;-1	3628300	3628300	52871000	3.10201e+07	58.2089	0.0927798
sp|P01881|IGHD_MOUSE		sp|P01881|IGHD_MOUSE;sp|P01882|IGHDM_MOUSE	sp|P01881|IGHD_MOUSE;sp|P01882|IGHDM_MOUSE	Ig delta chain C region secreted form OS=Mus musculus OX=10090 PE=1 SV=2;Ig delta chain C region membrane-bound form OS=Mus musculus OX=10090 PE=1 SV=3	2	2	14	28.368	257	0	48.056	0//0	1//0	0//0	43463000	12	4			-1;-1	3622000	3622000	54389000	3.37807e+07	58.1078	0.0926187
sp|Q8BQZ5-3|CPSF4_MOUSE	Cpsf4	sp|Q8BQZ5-3|CPSF4_MOUSE;sp|Q8BQZ5-2|CPSF4_MOUSE	sp|Q8BQZ5-3|CPSF4_MOUSE;sp|Q8BQZ5-2|CPSF4_MOUSE	Isoform 3 of Cleavage and polyadenylation specificity factor subunit 4 OS=Mus musculus OX=10090 GN=Cpsf4;Isoform 2 of Cleavage and polyadenylation specificity factor subunit 4 OS=Mus musculus OX=10090 GN=Cpsf4	2	4	23.6	23.958	212	0	26.478	0//0	1//0	0//0	46825000	13	8			-1;-1	3601900	3601900	60753000	3.16784e+07	57.7853	0.0921047
sp|Q8CBY8-2|DCTN4_MOUSE	Dctn4	sp|Q8CBY8-2|DCTN4_MOUSE;sp|Q8CBY8|DCTN4_MOUSE	sp|Q8CBY8-2|DCTN4_MOUSE;sp|Q8CBY8|DCTN4_MOUSE	Isoform 2 of Dynactin subunit 4 OS=Mus musculus OX=10090 GN=Dctn4;Dynactin subunit 4 OS=Mus musculus OX=10090 GN=Dctn4 PE=1 SV=1	2	6	18.5	52.241	460	0	47.81	0//0	1//0	1//0	68055000	19	10			-1;-1	3581800	3581800	86154000	3.71184e+07	57.4629	0.0915907
sp|Q9ERR7|SEP15_MOUSE	Selenof	sp|Q9ERR7|SEP15_MOUSE	sp|Q9ERR7|SEP15_MOUSE	Selenoprotein F OS=Mus musculus OX=10090 GN=Selenof PE=1 SV=3	1	2	17.3	17.806	162	0	37.432	0//0	1//0	0//0	31995000	9	3			-1	3555000	3555000	40011000	2.4867e+07	57.0329	0.0909054
sp|Q8C3X8|LMF2_MOUSE	Lmf2	sp|Q8C3X8|LMF2_MOUSE	sp|Q8C3X8|LMF2_MOUSE	Lipase maturation factor 2 OS=Mus musculus OX=10090 GN=Lmf2 PE=1 SV=1	1	3	7.4	79.996	702	0	92.232	0//0	1//0	0//0	77347000	22	5			-1	3515800	3515800	100460000	6.01147e+07	56.404	0.089903
sp|P52623|UCK1_MOUSE	Uck1	sp|P52623|UCK1_MOUSE	sp|P52623|UCK1_MOUSE	Uridine-cytidine kinase 1 OS=Mus musculus OX=10090 GN=Uck1 PE=1 SV=2	1	5	21.3	31.068	277	0	37.881	0//0	1//0	0//0	42099000	12	4			-1	3508300	3508300	54256000	2.73463e+07	56.2837	0.0897112
sp|Q61187|TS101_MOUSE	Tsg101	sp|Q61187|TS101_MOUSE	sp|Q61187|TS101_MOUSE	Tumor susceptibility gene 101 protein OS=Mus musculus OX=10090 GN=Tsg101 PE=1 SV=2	1	6	23.3	44.123	391	0	39.55	0//0	1//0	0//0	56039000	16	9			-1	3502400	3502400	75888000	3.01654e+07	56.1891	0.0895604
sp|Q8BP92|RCN2_MOUSE	Rcn2	sp|Q8BP92|RCN2_MOUSE	sp|Q8BP92|RCN2_MOUSE	Reticulocalbin-2 OS=Mus musculus OX=10090 GN=Rcn2 PE=1 SV=1	1	4	23.8	37.27	320	0	36.546	0//0	1//0	0//0	48265000	14	7			-1	3447500	3447500	56100000	3.52337e+07	55.3083	0.0881565
sp|P51863|VA0D1_MOUSE	Atp6v0d1	sp|P51863|VA0D1_MOUSE	sp|P51863|VA0D1_MOUSE	V-type proton ATPase subunit d 1 OS=Mus musculus OX=10090 GN=Atp6v0d1 PE=1 SV=2	1	3	9.7	40.301	351	0	22.575	0//0	1//0	0//0	54811000	16	7			-1	3425700	3425700	71781000	4.25995e+07	54.9586	0.0875991
sp|Q8CHS8|VP37A_MOUSE	Vps37a	sp|Q8CHS8|VP37A_MOUSE;sp|Q8CHS8-3|VP37A_MOUSE;sp|Q8CHS8-2|VP37A_MOUSE	sp|Q8CHS8|VP37A_MOUSE;sp|Q8CHS8-3|VP37A_MOUSE;sp|Q8CHS8-2|VP37A_MOUSE	Vacuolar protein sorting-associated protein 37A OS=Mus musculus OX=10090 GN=Vps37a PE=1 SV=1;Isoform 3 of Vacuolar protein sorting-associated protein 37A OS=Mus musculus OX=10090 GN=Vps37a;Isoform 2 of Vacuolar protein sorting-associated protein 37A OS=Mus	3	3	10.6	44.418	397	0	29.505	0//0	1//0	0//0	41093000	12	9			-1;-1;-1	3424400	3424400	52338000	3.19381e+07	54.9377	0.0875658
sp|P01902|HA1D_MOUSE	H2-K1	sp|P01902|HA1D_MOUSE	sp|P01902|HA1D_MOUSE	H-2 class I histocompatibility antigen, K-D alpha chain OS=Mus musculus OX=10090 GN=H2-K1 PE=1 SV=1	1	7	22	41.489	368	0	54.804	0//1	1//0	0//0	75106000	22	9			-1	3413900	3413900	93770000	4.18852e+07	54.7693	0.0872973
sp|Q9Z0M6|AGRE5_MOUSE	Adgre5	sp|Q9Z0M6|AGRE5_MOUSE;sp|Q9Z0M6-3|AGRE5_MOUSE;sp|Q9Z0M6-2|AGRE5_MOUSE	sp|Q9Z0M6|AGRE5_MOUSE;sp|Q9Z0M6-3|AGRE5_MOUSE;sp|Q9Z0M6-2|AGRE5_MOUSE	Adhesion G protein-coupled receptor E5 OS=Mus musculus OX=10090 GN=Adgre5 PE=1 SV=2;Isoform 3 of Adhesion G protein-coupled receptor E5 OS=Mus musculus OX=10090 GN=Adgre5;Isoform 2 of Adhesion G protein-coupled receptor E5 OS=Mus musculus OX=10090 GN=Adgre	3	7	11.5	90.412	818	0	129.94	0//0	1//0	0//0	119460000	35	16			-1;-1;-1	3413200	3413200	152690000	6.10597e+07	54.758	0.0872794
sp|Q8C522|ENDD1_MOUSE	Endod1	sp|Q8C522|ENDD1_MOUSE	sp|Q8C522|ENDD1_MOUSE	Endonuclease domain-containing 1 protein OS=Mus musculus OX=10090 GN=Endod1 PE=1 SV=2	1	7	17.8	55.262	501	0	56.94	0//0	1//0	0//0	74849000	22	13			-1	3402200	3402200	98576000	3.06766e+07	54.5816	0.0869982
sp|Q63850|NUP62_MOUSE	Nup62	sp|Q63850|NUP62_MOUSE	sp|Q63850|NUP62_MOUSE	Nuclear pore glycoprotein p62 OS=Mus musculus OX=10090 GN=Nup62 PE=1 SV=2	1	3	8.6	53.254	526	0	29.174	0//0	1//0	0//0	33995000	10	9			-1	3399500	3399500	43352000	2.64213e+07	54.5382	0.0869291
sp|Q4KML4|ABRAL_MOUSE	Abracl	sp|Q4KML4|ABRAL_MOUSE	sp|Q4KML4|ABRAL_MOUSE	Costars family protein ABRACL OS=Mus musculus OX=10090 GN=Abracl PE=1 SV=1	1	2	35.8	9.0303	81	0.0011274	13.08	0//0	1//0	0//0	13573000	4	4			-1	3393300	3393300	17654000	1.05492e+07	54.4388	0.0867706
sp|P97823|LYPA1_MOUSE	Lypla1	sp|P97823|LYPA1_MOUSE;sp|P97823-2|LYPA1_MOUSE	sp|P97823|LYPA1_MOUSE;sp|P97823-2|LYPA1_MOUSE	Acyl-protein thioesterase 1 OS=Mus musculus OX=10090 GN=Lypla1 PE=1 SV=1;Isoform 2 of Acyl-protein thioesterase 1 OS=Mus musculus OX=10090 GN=Lypla1	2	5	38.7	24.687	230	0	46.559	0//0	1//0	0//0	37241000	11	8			-1;-1	3385500	3385500	49440000	2.3133e+07	54.3136	0.0865711
sp|Q61334|BAP29_MOUSE	Bcap29	sp|Q61334|BAP29_MOUSE	sp|Q61334|BAP29_MOUSE	B-cell receptor-associated protein 29 OS=Mus musculus OX=10090 GN=Bcap29 PE=1 SV=1	1	3	10	27.964	240	0	31.577	0//0	1//0	0//0	43767000	13	8			-1	3366700	3366700	56022000	3.40166e+07	54.012	0.0860904
sp|Q8BG48|ST17B_MOUSE	Stk17b	sp|Q8BG48|ST17B_MOUSE	sp|Q8BG48|ST17B_MOUSE	Serine/threonine-protein kinase 17B OS=Mus musculus OX=10090 GN=Stk17b PE=1 SV=1	1	2	7.3	41.982	372	0	26.279	0//0	1//0	0//0	30152000	9	4			-1	3350300	3350300	37443000	2.34348e+07	53.7489	0.085671
sp|O88587-2|COMT_MOUSE	Comt	sp|O88587-2|COMT_MOUSE;sp|O88587|COMT_MOUSE	sp|O88587-2|COMT_MOUSE;sp|O88587|COMT_MOUSE	Isoform Soluble of Catechol O-methyltransferase OS=Mus musculus OX=10090 GN=Comt;Catechol O-methyltransferase OS=Mus musculus OX=10090 GN=Comt PE=1 SV=2	2	3	21.6	24.707	222	0	21.997	0//0	1//0	0//0	43191000	13	8			-1;-1	3322400	3322400	54845000	3.35683e+07	53.3013	0.0849576
sp|P14733|LMNB1_MOUSE	Lmnb1	sp|P14733|LMNB1_MOUSE	sp|P14733|LMNB1_MOUSE	Lamin-B1 OS=Mus musculus OX=10090 GN=Lmnb1 PE=1 SV=3	1	13	28.2	66.785	588	0	90.383	0//0	1//0	0//0	119340000	36	12			-1	3315100	3315100	150490000	3.81387e+07	53.1842	0.0847709
sp|Q91WF7|FIG4_MOUSE	Fig4	sp|Q91WF7|FIG4_MOUSE	sp|Q91WF7|FIG4_MOUSE	Polyphosphoinositide phosphatase OS=Mus musculus OX=10090 GN=Fig4 PE=1 SV=1	1	10	17.1	103.45	907	0	73.705	0//0	1//0	0//0	149150000	45	14			-1	3314400	3314400	193820000	8.01579e+07	53.173	0.084753
sp|O35218|CPSF2_MOUSE	Cpsf2	sp|O35218|CPSF2_MOUSE	sp|O35218|CPSF2_MOUSE	Cleavage and polyadenylation specificity factor subunit 2 OS=Mus musculus OX=10090 GN=Cpsf2 PE=1 SV=1	1	10	18	88.382	782	0	86.677	0//0	1//0	0//0	133980000	41	16			-1	3267700	3267700	170720000	5.58553e+07	52.4238	0.0835588
sp|Q8VD00|SGMR2_MOUSE	Tmem97	sp|Q8VD00|SGMR2_MOUSE	sp|Q8VD00|SGMR2_MOUSE	Sigma intracellular receptor 2 OS=Mus musculus OX=10090 GN=Tmem97 PE=1 SV=1	1	2	26.7	20.811	176	0	23.599	0//0	1//0	0//0	19555000	6	1			-1	3259100	3259100	21248000	1.51982e+07	52.2858	0.0833389
sp|O35435|PYRD_MOUSE	Dhodh	sp|O35435|PYRD_MOUSE	sp|O35435|PYRD_MOUSE	Dihydroorotate dehydrogenase (quinone), mitochondrial OS=Mus musculus OX=10090 GN=Dhodh PE=1 SV=2	1	7	26.6	42.699	395	0	53.035	0//0	1//0	0//0	68274000	21	12			-1	3251100	3251100	89028000	4.26435e+07	52.1575	0.0831343
sp|Q9QY93|DCTP1_MOUSE	Dctpp1	sp|Q9QY93|DCTP1_MOUSE	sp|Q9QY93|DCTP1_MOUSE	dCTP pyrophosphatase 1 OS=Mus musculus OX=10090 GN=Dctpp1 PE=1 SV=1	1	5	50	18.795	170	0	70.393	0//0	1//0	0//0	35316000	11	8			-1	3210600	3210600	41794000	2.26841e+07	51.5077	0.0820987
sp|Q9D0F3|LMAN1_MOUSE	Lman1	sp|Q9D0F3|LMAN1_MOUSE	sp|Q9D0F3|LMAN1_MOUSE	Protein ERGIC-53 OS=Mus musculus OX=10090 GN=Lman1 PE=1 SV=1	1	4	14.3	57.788	517	0	24.841	0//0	1//0	0//0	64158000	20	7			-1	3207900	3207900	83990000	3.92535e+07	51.4644	0.0820297
sp|P61226|RAP2B_MOUSE	Rap2b	sp|P61226|RAP2B_MOUSE;sp|Q80ZJ1-2|RAP2A_MOUSE;sp|Q80ZJ1|RAP2A_MOUSE	sp|P61226|RAP2B_MOUSE	Ras-related protein Rap-2b OS=Mus musculus OX=10090 GN=Rap2b PE=1 SV=1	3	3	34.4	20.504	183	0	26.145	0//0	1//0	0//0	35136000	11	4			-1;-1;-1	3194100	3194100	45341000	2.73077e+07	51.243	0.0816768
sp|Q3URS9-2|MITOK_MOUSE	Ccdc51	sp|Q3URS9-2|MITOK_MOUSE;sp|Q3URS9|MITOK_MOUSE	sp|Q3URS9-2|MITOK_MOUSE;sp|Q3URS9|MITOK_MOUSE	Isoform 2 of Mitochondrial potassium channel OS=Mus musculus OX=10090 GN=Ccdc51;Mitochondrial potassium channel OS=Mus musculus OX=10090 GN=Ccdc51 PE=1 SV=1	2	4	13.6	41.761	375	0	51.567	0//0	1//0	0//0	63601000	20	6			-1;-1	3180000	3180000	81769000	4.94318e+07	51.0168	0.0813162
sp|Q9JKL4|NDUF3_MOUSE	Ndufaf3	sp|Q9JKL4|NDUF3_MOUSE	sp|Q9JKL4|NDUF3_MOUSE	NADH dehydrogenase [ubiquinone] 1 alpha subcomplex assembly factor 3 OS=Mus musculus OX=10090 GN=Ndufaf3 PE=1 SV=1	1	2	18.9	20.733	185	0.00060976	17.345	0//0	1//0	0//0	28494000	9	3			-1	3166000	3166000	35202000	2.21461e+07	50.7922	0.0809582
sp|P62071|RRAS2_MOUSE	Rras2	sp|P62071|RRAS2_MOUSE	sp|P62071|RRAS2_MOUSE	Ras-related protein R-Ras2 OS=Mus musculus OX=10090 GN=Rras2 PE=1 SV=1	1	3	17.2	23.399	204	0	44.603	0//0	1//0	0//0	47297000	15	7			-1	3153100	3153100	61352000	3.67599e+07	50.5852	0.0806284
sp|Q8VHL0|UT1_MOUSE	Slc14a1	sp|Q8VHL0|UT1_MOUSE;sp|Q8VHL0-2|UT1_MOUSE	sp|Q8VHL0|UT1_MOUSE;sp|Q8VHL0-2|UT1_MOUSE	Urea transporter 1 OS=Mus musculus OX=10090 GN=Slc14a1 PE=1 SV=2;Isoform 2 of Urea transporter 1 OS=Mus musculus OX=10090 GN=Slc14a1	2	2	7.6	42.125	384	0.0021209	10.863	0//0	1//0	0//0	28176000	9	3			-1;-1	3130600	3130600	37353000	2.18986e+07	50.2243	0.080053
sp|Q9Z1R3|APOM_MOUSE	Apom	sp|Q9Z1R3|APOM_MOUSE	sp|Q9Z1R3|APOM_MOUSE	Apolipoprotein M OS=Mus musculus OX=10090 GN=Apom PE=1 SV=1	1	2	11.6	21.273	190	0.00060205	16.455	0//0	1//0	0//0	24786000	8	3			-1	3098300	3098300	32406000	1.92641e+07	49.7061	0.0792271
sp|P35329|CD22_MOUSE	Cd22	sp|P35329|CD22_MOUSE;sp|P35329-3|CD22_MOUSE;sp|P35329-2|CD22_MOUSE	sp|P35329|CD22_MOUSE;sp|P35329-3|CD22_MOUSE;sp|P35329-2|CD22_MOUSE	B-cell receptor CD22 OS=Mus musculus OX=10090 GN=Cd22 PE=1 SV=1;Isoform 3 of B-cell receptor CD22 OS=Mus musculus OX=10090 GN=Cd22;Isoform 2 of B-cell receptor CD22 OS=Mus musculus OX=10090 GN=Cd22	3	9	18.1	96.581	862	0	128.43	0//0	1//0	0//0	111030000	36	23			-1;-1;-1	3084200	3084200	139920000	4.39175e+07	49.4799	0.0788665
sp|O09005|DEGS1_MOUSE	Degs1	sp|O09005|DEGS1_MOUSE	sp|O09005|DEGS1_MOUSE	Sphingolipid delta(4)-desaturase DES1 OS=Mus musculus OX=10090 GN=Degs1 PE=1 SV=1	1	2	10.5	38.241	323	0.0006035	16.564	0//0	1//0	0//0	21508000	7	2			-1	3072600	3072600	27458000	1.67165e+07	49.2938	0.0785699
sp|Q6P5F9|XPO1_MOUSE	Xpo1	sp|Q6P5F9|XPO1_MOUSE	sp|Q6P5F9|XPO1_MOUSE	Exportin-1 OS=Mus musculus OX=10090 GN=Xpo1 PE=1 SV=1	1	11	14.1	123.09	1071	0	167.08	0//0	1//0	0//0	162730000	53	24			-1	3070400	3070400	209050000	5.67674e+07	49.2585	0.0785136
sp|Q02013|AQP1_MOUSE	Aqp1	sp|Q02013|AQP1_MOUSE	sp|Q02013|AQP1_MOUSE	Aquaporin-1 OS=Mus musculus OX=10090 GN=Aqp1 PE=1 SV=3	1	2	15.6	28.793	269	0	34.472	0//0	1//0	0//0	18128000	6	1			-1	3021400	3021400	21901000	1.40897e+07	48.4724	0.0772607
sp|Q8BG51|MIRO1_MOUSE	Rhot1	sp|Q8BG51|MIRO1_MOUSE;sp|Q8BG51-2|MIRO1_MOUSE;sp|Q8BG51-3|MIRO1_MOUSE;sp|Q8BG51-4|MIRO1_MOUSE	sp|Q8BG51|MIRO1_MOUSE;sp|Q8BG51-2|MIRO1_MOUSE;sp|Q8BG51-3|MIRO1_MOUSE;sp|Q8BG51-4|MIRO1_MOUSE	Mitochondrial Rho GTPase 1 OS=Mus musculus OX=10090 GN=Rhot1 PE=1 SV=1;Isoform 2 of Mitochondrial Rho GTPase 1 OS=Mus musculus OX=10090 GN=Rhot1;Isoform 3 of Mitochondrial Rho GTPase 1 OS=Mus musculus OX=10090 GN=Rhot1;Isoform 4 of Mitochondrial Rho GTPase	4	5	8.2	72.241	631	0	40.993	0//0	1//0	0//0	93193000	31	16			-1;-1;-1;-1	3006200	3006200	109220000	5.92177e+07	48.2285	0.076872
sp|Q9WUK4|RFC2_MOUSE	Rfc2	sp|Q9WUK4|RFC2_MOUSE	sp|Q9WUK4|RFC2_MOUSE	Replication factor C subunit 2 OS=Mus musculus OX=10090 GN=Rfc2 PE=1 SV=1	1	7	28.9	38.724	349	0	53.75	0//0	1//0	1//0	65400000	22	15			-1	2972700	2972700	82929000	3.15264e+07	47.6911	0.0760153
sp|Q8BGZ4|CDC23_MOUSE	Cdc23	sp|Q8BGZ4|CDC23_MOUSE;sp|Q8BGZ4-2|CDC23_MOUSE	sp|Q8BGZ4|CDC23_MOUSE;sp|Q8BGZ4-2|CDC23_MOUSE	Cell division cycle protein 23 homolog OS=Mus musculus OX=10090 GN=Cdc23 PE=1 SV=2;Isoform 2 of Cell division cycle protein 23 homolog OS=Mus musculus OX=10090 GN=Cdc23	2	5	13.9	68.561	597	0	72.697	0//0	1//0	0//0	94534000	32	10			-1;-1	2954200	2954200	121630000	6.09282e+07	47.3943	0.0755423
sp|Q9DBH5|LMAN2_MOUSE	Lman2	sp|Q9DBH5|LMAN2_MOUSE	sp|Q9DBH5|LMAN2_MOUSE	Vesicular integral-membrane protein VIP36 OS=Mus musculus OX=10090 GN=Lman2 PE=1 SV=2	1	5	20.9	40.429	358	0	64.609	0//0	1//0	0//0	56127000	19	8			-1	2954100	2954100	72566000	3.0636e+07	47.3927	0.0755397
sp|E9PVA8|GCN1_MOUSE	Gcn1	sp|E9PVA8|GCN1_MOUSE	sp|E9PVA8|GCN1_MOUSE	eIF-2-alpha kinase activator GCN1 OS=Mus musculus OX=10090 GN=Gcn1 PE=1 SV=1	1	42	20.6	293.02	2671	0	323.31	0//0	1//0	0//0	479520000	163	86			-1	2941800	2941800	608100000	5.90277e+07	47.1953	0.0752252
sp|Q9WVL1|AP4S1_MOUSE	Ap4s1	sp|Q9WVL1|AP4S1_MOUSE	sp|Q9WVL1|AP4S1_MOUSE	AP-4 complex subunit sigma-1 OS=Mus musculus OX=10090 GN=Ap4s1 PE=2 SV=1	1	2	13.2	16.817	144	0.0011377	13.572	0//0	1//0	0//0	20379000	7	5			-1	2911300	2911300	26780000	1.58389e+07	46.706	0.0744453
sp|Q8K5B2|MCFD2_MOUSE	Mcfd2	sp|Q8K5B2|MCFD2_MOUSE	sp|Q8K5B2|MCFD2_MOUSE	Multiple coagulation factor deficiency protein 2 homolog OS=Mus musculus OX=10090 GN=Mcfd2 PE=1 SV=1	1	2	33.1	16.168	145	0.0011211	12.957	0//0	1//0	0//0	17132000	6	2			-1	2855300	2855300	20800000	1.33149e+07	45.8076	0.0730133
sp|Q8BZ09|ODC_MOUSE	Slc25a21	sp|Q8BZ09|ODC_MOUSE	sp|Q8BZ09|ODC_MOUSE	Mitochondrial 2-oxodicarboxylate carrier OS=Mus musculus OX=10090 GN=Slc25a21 PE=1 SV=1	1	4	19.5	33.228	298	0	61.408	0//0	1//0	0//0	54158000	19	10			-1	2850400	2850400	71793000	3.71473e+07	45.729	0.072888
sp|Q91XD7|CREL1_MOUSE	Creld1	sp|Q91XD7|CREL1_MOUSE	sp|Q91XD7|CREL1_MOUSE	Protein disulfide isomerase Creld1 OS=Mus musculus OX=10090 GN=Creld1 PE=1 SV=1	1	6	18.1	45.717	420	0	51.987	0//0	1//0	0//0	59762000	21	12			-1	2845800	2845800	74323000	3.24993e+07	45.6552	0.0727704
sp|Q9WTI7-2|MYO1C_MOUSE	Myo1c	sp|Q9WTI7-2|MYO1C_MOUSE;sp|Q9WTI7-3|MYO1C_MOUSE;sp|Q9WTI7|MYO1C_MOUSE;sp|Q9WTI7-4|MYO1C_MOUSE	sp|Q9WTI7-2|MYO1C_MOUSE;sp|Q9WTI7-3|MYO1C_MOUSE;sp|Q9WTI7|MYO1C_MOUSE;sp|Q9WTI7-4|MYO1C_MOUSE	Isoform 2 of Unconventional myosin-Ic OS=Mus musculus OX=10090 GN=Myo1c;Isoform 3 of Unconventional myosin-Ic OS=Mus musculus OX=10090 GN=Myo1c;Unconventional myosin-Ic OS=Mus musculus OX=10090 GN=Myo1c PE=1 SV=2;Isoform 4 of Unconventional myosin-Ic OS=Mu	4	15	21.4	118.15	1028	0	138.61	0//0	1//0	0//0	151980000	54	26			-1;-1;-1;-1	2814500	2814500	191000000	5.77978e+07	45.1531	0.07197
sp|Q8VDI7|UBAC1_MOUSE	Ubac1	sp|Q8VDI7|UBAC1_MOUSE	sp|Q8VDI7|UBAC1_MOUSE	Ubiquitin-associated domain-containing protein 1 OS=Mus musculus OX=10090 GN=Ubac1 PE=1 SV=2	1	5	15.4	45.53	409	0	52.674	0//0	1//0	0//0	55998000	20	7			-1	2799900	2799900	68910000	3.32959e+07	44.9188	0.0715966
sp|P97742|CPT1A_MOUSE	Cpt1a	sp|P97742|CPT1A_MOUSE	sp|P97742|CPT1A_MOUSE	Carnitine O-palmitoyltransferase 1, liver isoform OS=Mus musculus OX=10090 GN=Cpt1a PE=1 SV=4	1	6	12.5	88.25	773	0	72.934	0//0	1//0	0//0	106350000	38	15			-1	2798600	2798600	131940000	6.9527e+07	44.898	0.0715634
sp|P50172|DHI1_MOUSE	Hsd11b1	sp|P50172|DHI1_MOUSE	sp|P50172|DHI1_MOUSE	Corticosteroid 11-beta-dehydrogenase isozyme 1 OS=Mus musculus OX=10090 GN=Hsd11b1 PE=1 SV=3	1	4	15.1	32.364	292	0	31.634	0//0	1//0	0//0	50347000	18	9			-1	2797000	2797000	64979000	3.17317e+07	44.8723	0.0715225
sp|Q3TAS6-2|EMC10_MOUSE	Emc10	sp|Q3TAS6-2|EMC10_MOUSE;sp|Q3TAS6|EMC10_MOUSE	sp|Q3TAS6-2|EMC10_MOUSE;sp|Q3TAS6|EMC10_MOUSE	Isoform 2 of ER membrane protein complex subunit 10 OS=Mus musculus OX=10090 GN=Emc10;ER membrane protein complex subunit 10 OS=Mus musculus OX=10090 GN=Emc10 PE=2 SV=2	2	2	15	26.687	254	0.0006215	18.284	0//0	1//0	0//0	24817000	9	2			-1;-1	2757400	2757400	30587000	1.92881e+07	44.237	0.0705099
sp|Q91ZE5|AGRE4_MOUSE	Adgre4	sp|Q91ZE5|AGRE4_MOUSE	sp|Q91ZE5|AGRE4_MOUSE	Adhesion G protein-coupled receptor E4 OS=Mus musculus OX=10090 GN=Adgre4 PE=1 SV=1	1	6	12.9	77.044	689	0	59.297	0//0	1//0	0//0	65858000	24	11			-1	2744100	2744100	82133000	3.80476e+07	44.0236	0.0701698
sp|Q8CI59|STEA3_MOUSE	Steap3	sp|Q8CI59|STEA3_MOUSE;sp|Q8CI59-2|STEA3_MOUSE	sp|Q8CI59|STEA3_MOUSE;sp|Q8CI59-2|STEA3_MOUSE	Metalloreductase STEAP3 OS=Mus musculus OX=10090 GN=Steap3 PE=1 SV=1;Isoform 2 of Metalloreductase STEAP3 OS=Mus musculus OX=10090 GN=Steap3	2	5	13.1	54.748	488	0	39.318	0//0	1//0	0//0	64773000	24	8			-1;-1	2698900	2698900	84762000	4.22111e+07	43.2985	0.069014
sp|Q9JJ00|PLS1_MOUSE	Plscr1	sp|Q9JJ00|PLS1_MOUSE	sp|Q9JJ00|PLS1_MOUSE	Phospholipid scramblase 1 OS=Mus musculus OX=10090 GN=Plscr1 PE=1 SV=1	1	2	7.6	35.914	328	0	18.824	0//0	1//0	0//0	29679000	11	5			-1	2698100	2698100	38829000	2.30666e+07	43.2857	0.0689935
sp|Q8BU14|SEC62_MOUSE	Sec62	sp|Q8BU14|SEC62_MOUSE	sp|Q8BU14|SEC62_MOUSE	Translocation protein SEC62 OS=Mus musculus OX=10090 GN=Sec62 PE=1 SV=1	1	4	7.5	45.58	398	0	33.646	0//0	1//0	0//0	42737000	16	6			-1	2671100	2671100	60666000	2.90207e+07	42.8525	0.0683031
sp|P25911-2|LYN_MOUSE	Lyn	sp|P25911-2|LYN_MOUSE;sp|P25911|LYN_MOUSE;sp|P16277|BLK_MOUSE	sp|P25911-2|LYN_MOUSE;sp|P25911|LYN_MOUSE	Isoform 2 of Tyrosine-protein kinase Lyn OS=Mus musculus OX=10090 GN=Lyn;Tyrosine-protein kinase Lyn OS=Mus musculus OX=10090 GN=Lyn PE=1 SV=4	3	9	21	56.285	491	0	65.444	0//0	1//0	0//0	74762000	28	15			-1;-1;-1	2670100	2670100	90511000	3.50182e+07	42.8365	0.0682775
sp|Q9ESM6|GDPD2_MOUSE	Gdpd2	sp|Q9ESM6|GDPD2_MOUSE	sp|Q9ESM6|GDPD2_MOUSE	Glycerophosphoinositol inositolphosphodiesterase GDPD2 OS=Mus musculus OX=10090 GN=Gdpd2 PE=1 SV=1	1	4	8.7	61.164	539	0	30.439	0//0	1//0	0//0	47997000	18	6			-1	2666500	2666500	67981000	3.36461e+07	42.7787	0.0681855
sp|P0C0A3|CHMP6_MOUSE	Chmp6	sp|P0C0A3|CHMP6_MOUSE	sp|P0C0A3|CHMP6_MOUSE	Charged multivesicular body protein 6 OS=Mus musculus OX=10090 GN=Chmp6 PE=1 SV=2	1	2	12.5	23.415	200	0	36.752	0//0	1//0	0//0	20983000	8	3			-1	2622900	2622900	26291000	1.63085e+07	42.0792	0.0670706
sp|O88630|GOSR1_MOUSE	Gosr1	sp|O88630|GOSR1_MOUSE	sp|O88630|GOSR1_MOUSE	Golgi SNAP receptor complex member 1 OS=Mus musculus OX=10090 GN=Gosr1 PE=1 SV=2	1	5	26.4	28.489	250	0	88.985	0//0	1//0	0//0	41533000	16	9			-1	2595800	2595800	55477000	2.70984e+07	41.6445	0.0663776
sp|Q9CX86|ROA0_MOUSE	Hnrnpa0	sp|Q9CX86|ROA0_MOUSE	sp|Q9CX86|ROA0_MOUSE	Heterogeneous nuclear ribonucleoprotein A0 OS=Mus musculus OX=10090 GN=Hnrnpa0 PE=1 SV=1	1	4	23.6	30.53	305	0	43.812	0//0	1//0	0//0	38843000	15	8			-1	2589600	2589600	48209000	2.83867e+07	41.545	0.066219
sp|Q9D083-3|SPC24_MOUSE	Spc24	sp|Q9D083-3|SPC24_MOUSE;sp|Q9D083-2|SPC24_MOUSE;sp|Q9D083|SPC24_MOUSE	sp|Q9D083-3|SPC24_MOUSE;sp|Q9D083-2|SPC24_MOUSE;sp|Q9D083|SPC24_MOUSE	Isoform 3 of Kinetochore protein Spc24 OS=Mus musculus OX=10090 GN=Spc24;Isoform 2 of Kinetochore protein Spc24 OS=Mus musculus OX=10090 GN=Spc24;Kinetochore protein Spc24 OS=Mus musculus OX=10090 GN=Spc24 PE=1 SV=1	3	5	48.2	16.016	137	0	46.635	0//0	1//0	0//0	23151000	9	2			-1;-1;-1	2572300	2572300	34363000	1.5676e+07	41.2675	0.0657767
sp|Q9JL26|FMNL1_MOUSE	Fmnl1	sp|Q9JL26|FMNL1_MOUSE;sp|Q9JL26-2|FMNL1_MOUSE	sp|Q9JL26|FMNL1_MOUSE;sp|Q9JL26-2|FMNL1_MOUSE	Formin-like protein 1 OS=Mus musculus OX=10090 GN=Fmnl1 PE=1 SV=1;Isoform 2 of Formin-like protein 1 OS=Mus musculus OX=10090 GN=Fmnl1	2	13	16.3	122.06	1094	0	101.03	0//0	1//0	0//0	138900000	55	21			-1;-1	2525500	2525500	175860000	4.93782e+07	40.5166	0.0645799
sp|Q80UY2|KCMF1_MOUSE	Kcmf1	sp|Q80UY2|KCMF1_MOUSE;sp|Q80UY2-2|KCMF1_MOUSE	sp|Q80UY2|KCMF1_MOUSE;sp|Q80UY2-2|KCMF1_MOUSE	E3 ubiquitin-protein ligase KCMF1 OS=Mus musculus OX=10090 GN=Kcmf1 PE=1 SV=1;Isoform 2 of E3 ubiquitin-protein ligase KCMF1 OS=Mus musculus OX=10090 GN=Kcmf1	2	5	14.7	41.791	381	0	43.604	0//0	1//0	0//0	37699000	15	7			-1;-1	2513300	2513300	48741000	2.69012e+07	40.3209	0.064268
sp|Q3URD3-4|SLMAP_MOUSE	Slmap	sp|Q3URD3-4|SLMAP_MOUSE;sp|Q3URD3-3|SLMAP_MOUSE;sp|Q3URD3-5|SLMAP_MOUSE;sp|Q3URD3-2|SLMAP_MOUSE;sp|Q3URD3|SLMAP_MOUSE	sp|Q3URD3-4|SLMAP_MOUSE;sp|Q3URD3-3|SLMAP_MOUSE;sp|Q3URD3-5|SLMAP_MOUSE;sp|Q3URD3-2|SLMAP_MOUSE;sp|Q3URD3|SLMAP_MOUSE	Isoform 4 of Sarcolemmal membrane-associated protein OS=Mus musculus OX=10090 GN=Slmap;Isoform 3 of Sarcolemmal membrane-associated protein OS=Mus musculus OX=10090 GN=Slmap;Isoform 5 of Sarcolemmal membrane-associated protein OS=Mus musculus OX=10090 GN=S	5	8	27	41.864	359	0	75.804	0//0	1//0	0//0	62669000	25	11			-1;-1;-1;-1;-1	2506800	2506800	79165000	3.98385e+07	40.2166	0.0641017
sp|Q9D4V7-2|RABL3_MOUSE	Rabl3	sp|Q9D4V7-2|RABL3_MOUSE;sp|Q9D4V7|RABL3_MOUSE	sp|Q9D4V7-2|RABL3_MOUSE;sp|Q9D4V7|RABL3_MOUSE	Isoform 2 of Rab-like protein 3 OS=Mus musculus OX=10090 GN=Rabl3;Rab-like protein 3 OS=Mus musculus OX=10090 GN=Rabl3 PE=1 SV=1	2	2	24	14.034	129	0.0021164	10.825	0//0	1//0	0//0	19971000	8	4			-1;-1	2496300	2496300	26979000	1.55215e+07	40.0482	0.0638332
sp|Q9D8X5|CNOT8_MOUSE	Cnot8	sp|Q9D8X5|CNOT8_MOUSE	sp|Q9D8X5|CNOT8_MOUSE	CCR4-NOT transcription complex subunit 8 OS=Mus musculus OX=10090 GN=Cnot8 PE=2 SV=1	1	3	12.7	33.574	292	0	28.825	0//0	1//0	0//0	39892000	16	5			-1	2493200	2493200	51466000	3.1004e+07	39.9985	0.063754
sp|Q09200|B4GN1_MOUSE	B4galnt1	sp|Q09200|B4GN1_MOUSE	sp|Q09200|B4GN1_MOUSE	Beta-1,4 N-acetylgalactosaminyltransferase 1 OS=Mus musculus OX=10090 GN=B4galnt1 PE=1 SV=1	1	11	29.8	59.211	533	0	72.552	0//0	1//0	1//0	71725000	29	17			-1	2473300	2473300	89988000	3.67622e+07	39.6792	0.0632451
sp|P13439|UMPS_MOUSE	Umps	sp|P13439|UMPS_MOUSE	sp|P13439|UMPS_MOUSE	Uridine 5-monophosphate synthase OS=Mus musculus OX=10090 GN=Umps PE=1 SV=3	1	8	26.8	52.292	481	0	78.585	0//0	1//0	0//0	63571000	26	14			-1	2445000	2445000	82117000	3.15177e+07	39.2252	0.0625214
sp|Q61263|SOAT1_MOUSE	Soat1	sp|Q61263|SOAT1_MOUSE	sp|Q61263|SOAT1_MOUSE	Sterol O-acyltransferase 1 OS=Mus musculus OX=10090 GN=Soat1 PE=1 SV=2	1	2	5.7	63.798	540	0.00061463	17.734	0//0	1//0	0//0	53723000	22	6			-1	2442000	2442000	69455000	4.17541e+07	39.177	0.0624447
sp|Q9Z2G6|SE1L1_MOUSE	Sel1l	sp|Q9Z2G6|SE1L1_MOUSE;sp|Q9Z2G6-2|SE1L1_MOUSE	sp|Q9Z2G6|SE1L1_MOUSE;sp|Q9Z2G6-2|SE1L1_MOUSE	Protein sel-1 homolog 1 OS=Mus musculus OX=10090 GN=Sel1l PE=1 SV=2;Isoform 2 of Protein sel-1 homolog 1 OS=Mus musculus OX=10090 GN=Sel1l	2	9	24.6	88.339	790	0	99.045	0//0	1//0	0//0	94255000	39	12			-1;-1	2416800	2416800	121400000	3.96762e+07	38.7728	0.0618003
sp|P21279|GNAQ_MOUSE	Gnaq	sp|P21279|GNAQ_MOUSE;sp|P30677|GNA14_MOUSE;sp|P21278|GNA11_MOUSE	sp|P21279|GNAQ_MOUSE	Guanine nucleotide-binding protein G(q) subunit alpha OS=Mus musculus OX=10090 GN=Gnaq PE=1 SV=4	3	5	19.2	42.158	359	0	35.944	0//0	1//0	0//0	45634000	19	10			-1;-1;-1	2401800	2401800	57577000	2.94146e+07	38.5321	0.0614168
sp|Q3TDQ1|STT3B_MOUSE	Stt3b	sp|Q3TDQ1|STT3B_MOUSE	sp|Q3TDQ1|STT3B_MOUSE	Dolichyl-diphosphooligosaccharide--protein glycosyltransferase subunit STT3B OS=Mus musculus OX=10090 GN=Stt3b PE=1 SV=2	1	6	12.9	93.245	823	0	52.097	0//0	1//0	0//0	76595000	32	14			-1	2393600	2393600	91614000	4.13968e+07	38.4006	0.0612071
sp|Q9D753|EXOS8_MOUSE	Exosc8	sp|Q9D753|EXOS8_MOUSE	sp|Q9D753|EXOS8_MOUSE	Exosome complex component RRP43 OS=Mus musculus OX=10090 GN=Exosc8 PE=1 SV=1	1	4	19.9	29.949	276	0	23.434	0//0	1//0	0//0	28653000	12	3			-1	2387700	2387700	39703000	1.87722e+07	38.3059	0.0610562
sp|Q8CCM6|TIM21_MOUSE	Timm21	sp|Q8CCM6|TIM21_MOUSE;sp|Q8CCM6-3|TIM21_MOUSE	sp|Q8CCM6|TIM21_MOUSE	Mitochondrial import inner membrane translocase subunit Tim21 OS=Mus musculus OX=10090 GN=Timm21 PE=1 SV=2	2	3	20.1	27.911	244	0	24.123	0//0	1//0	1//0	35220000	15	3			-1;-1	2348000	2348000	42198000	2.73737e+07	37.669	0.060041
sp|Q8C1S0|MED19_MOUSE	Med19	sp|Q8C1S0|MED19_MOUSE	sp|Q8C1S0|MED19_MOUSE	Mediator of RNA polymerase II transcription subunit 19 OS=Mus musculus OX=10090 GN=Med19 PE=1 SV=1	1	3	24.6	26.263	244	0.00061013	17.408	0//0	1//0	0//0	18763000	8	3			-1	2345400	2345400	20487000	1.45831e+07	37.6273	0.0599746
sp|Q91VK1|BZW2_MOUSE	Bzw2	sp|Q91VK1|BZW2_MOUSE	sp|Q91VK1|BZW2_MOUSE	Basic leucine zipper and W2 domain-containing protein 2 OS=Mus musculus OX=10090 GN=Bzw2 PE=1 SV=1	1	6	17.4	48.063	419	0	58.601	0//0	1//0	0//0	62465000	27	11			-1	2313500	2313500	79767000	2.99311e+07	37.1155	0.0591588
sp|Q8BJU0-2|SGTA_MOUSE	Sgta	sp|Q8BJU0-2|SGTA_MOUSE;sp|Q8BJU0|SGTA_MOUSE	sp|Q8BJU0-2|SGTA_MOUSE;sp|Q8BJU0|SGTA_MOUSE	Isoform 2 of Small glutamine-rich tetratricopeptide repeat-containing protein alpha OS=Mus musculus OX=10090 GN=Sgta;Small glutamine-rich tetratricopeptide repeat-containing protein alpha OS=Mus musculus OX=10090 GN=Sgta PE=1 SV=2	2	3	12.7	34.194	314	0.00061125	17.489	0//0	1//0	0//0	27610000	12	2			-1;-1	2300900	2300900	35443000	2.1459e+07	36.9134	0.0588366
sp|Q80UJ7|RB3GP_MOUSE	Rab3gap1	sp|Q80UJ7|RB3GP_MOUSE	sp|Q80UJ7|RB3GP_MOUSE	Rab3 GTPase-activating protein catalytic subunit OS=Mus musculus OX=10090 GN=Rab3gap1 PE=1 SV=4	1	15	20.3	110.2	981	0	122.4	0//0	1//0	1//0	114330000	50	28			-1	2286600	2286600	145820000	3.77582e+07	36.684	0.058471
sp|Q921G7|ETFD_MOUSE	Etfdh	sp|Q921G7|ETFD_MOUSE	sp|Q921G7|ETFD_MOUSE	Electron transfer flavoprotein-ubiquinone oxidoreductase, mitochondrial OS=Mus musculus OX=10090 GN=Etfdh PE=1 SV=1	1	10	19.5	68.09	616	0	63.286	0//0	1//0	0//0	73014000	32	11			-1	2281700	2281700	95031000	3.19272e+07	36.6054	0.0583457
sp|Q8CAQ8|MIC60_MOUSE	Immt	sp|Q8CAQ8|MIC60_MOUSE;sp|Q8CAQ8-5|MIC60_MOUSE	sp|Q8CAQ8|MIC60_MOUSE;sp|Q8CAQ8-5|MIC60_MOUSE	MICOS complex subunit Mic60 OS=Mus musculus OX=10090 GN=Immt PE=1 SV=1;Isoform 5 of MICOS complex subunit Mic60 OS=Mus musculus OX=10090 GN=Immt	2	2	75.8	83.899	757	0	23.653	0//1	1//0	0//1	106450000	47	7			-1;-1	2264800	2264800	138790000	8.27306e+07	36.3342	0.0579135
sp|Q8JZU2|TXTP_MOUSE	Slc25a1	sp|Q8JZU2|TXTP_MOUSE	sp|Q8JZU2|TXTP_MOUSE	Tricarboxylate transport protein, mitochondrial OS=Mus musculus OX=10090 GN=Slc25a1 PE=1 SV=1	1	4	14.5	33.931	311	0	29.127	0//0	1//0	0//0	36038000	16	9			-1	2252400	2252400	44703000	2.28938e+07	36.1353	0.0575964
sp|Q3UM29|COG7_MOUSE	Cog7	sp|Q3UM29|COG7_MOUSE	sp|Q3UM29|COG7_MOUSE	Conserved oligomeric Golgi complex subunit 7 OS=Mus musculus OX=10090 GN=Cog7 PE=1 SV=1	1	13	23.8	86.072	770	0	88.916	0//0	1//0	0//0	92232000	41	18			-1	2249600	2249600	122290000	3.15087e+07	36.0904	0.0575248
sp|Q6NZA9|TAF9B_MOUSE	Taf9b	sp|Q6NZA9|TAF9B_MOUSE;sp|Q8VI33|TAF9_MOUSE	sp|Q6NZA9|TAF9B_MOUSE;sp|Q8VI33|TAF9_MOUSE	Transcription initiation factor TFIID subunit 9B OS=Mus musculus OX=10090 GN=Taf9b PE=1 SV=2;Transcription initiation factor TFIID subunit 9 OS=Mus musculus OX=10090 GN=Taf9 PE=1 SV=1	2	2	7.6	27.172	249	0.0011792	15.185	0//0	1//0	0//0	31396000	14	6			-1;-1	2242500	2242500	41016000	2.44007e+07	35.9765	0.0573433
sp|P60898|RPB9_MOUSE	Polr2i	sp|P60898|RPB9_MOUSE	sp|P60898|RPB9_MOUSE	DNA-directed RNA polymerase II subunit RPB9 OS=Mus musculus OX=10090 GN=Polr2i PE=1 SV=1	1	2	28.8	14.523	125	0.0011422	13.704	0//0	1//0	0//0	17849000	8	3			-1	2231200	2231200	21000000	1.38728e+07	35.7952	0.0570543
sp|P01898|HA10_MOUSE	H2-Q10	sp|P01898|HA10_MOUSE	sp|P01898|HA10_MOUSE	H-2 class I histocompatibility antigen, Q10 alpha chain OS=Mus musculus OX=10090 GN=H2-Q10 PE=1 SV=3	1	2	17.5	37.251	325	0	24.045	0//1	1//0	0//1	37629000	17	6			-1	2213500	2213500	48928000	2.92455e+07	35.5112	0.0566017
sp|Q922S4-2|PDE2A_MOUSE	Pde2a	sp|Q922S4-2|PDE2A_MOUSE;sp|Q922S4-3|PDE2A_MOUSE;sp|Q922S4|PDE2A_MOUSE	sp|Q922S4-2|PDE2A_MOUSE;sp|Q922S4-3|PDE2A_MOUSE;sp|Q922S4|PDE2A_MOUSE	Isoform PDE2A1 of cGMP-dependent 3,5-cyclic phosphodiesterase OS=Mus musculus OX=10090 GN=Pde2a;Isoform PDE2A2 of cGMP-dependent 3,5-cyclic phosphodiesterase OS=Mus musculus OX=10090 GN=Pde2a;cGMP-dependent 3,5-cyclic phosphodiesterase OS=Mus musculu	3	9	19.3	103.29	916	0	109.01	0//0	1//0	0//0	108610000	50	21			-1;-1;-1	2172200	2172200	136230000	5.10425e+07	34.8486	0.0555456
sp|Q9CWD8|NUBPL_MOUSE	Nubpl	sp|Q9CWD8|NUBPL_MOUSE	sp|Q9CWD8|NUBPL_MOUSE	Iron-sulfur protein NUBPL OS=Mus musculus OX=10090 GN=Nubpl PE=1 SV=2	1	3	16.9	34.139	319	0	27.616	0//0	1//0	0//0	28075000	13	5			-1	2159600	2159600	36344000	2.18205e+07	34.6465	0.0552234
sp|Q8BFQ8|GALD1_MOUSE	Gatd1	sp|Q8BFQ8|GALD1_MOUSE	sp|Q8BFQ8|GALD1_MOUSE	Glutamine amidotransferase-like class 1 domain-containing protein 1 OS=Mus musculus OX=10090 GN=Gatd1 PE=1 SV=1	1	4	23.2	23.277	220	0	25.13	0//0	1//0	1//0	19428000	9	6			-1	2158600	2158600	26617000	1.50994e+07	34.6305	0.0551979
sp|Q8BFY9|TNPO1_MOUSE	Tnpo1	sp|Q8BFY9|TNPO1_MOUSE;sp|Q8BFY9-2|TNPO1_MOUSE;sp|Q99LG2|TNPO2_MOUSE	sp|Q8BFY9|TNPO1_MOUSE;sp|Q8BFY9-2|TNPO1_MOUSE	Transportin-1 OS=Mus musculus OX=10090 GN=Tnpo1 PE=1 SV=2;Isoform 2 of Transportin-1 OS=Mus musculus OX=10090 GN=Tnpo1	3	6	10.2	102.36	898	0	46.818	0//0	1//0	0//0	74544000	35	14			-1;-1;-1	2129800	2129800	98505000	4.76478e+07	34.1684	0.0544614
sp|P29533|VCAM1_MOUSE	Vcam1	sp|P29533|VCAM1_MOUSE;sp|P29533-2|VCAM1_MOUSE	sp|P29533|VCAM1_MOUSE	Vascular cell adhesion protein 1 OS=Mus musculus OX=10090 GN=Vcam1 PE=1 SV=1	2	8	16.8	81.317	739	0	68.488	0//0	1//0	0//0	82733000	39	15			-1;-1	2121400	2121400	108880000	3.03319e+07	34.0337	0.0542466
sp|Q6ZQK5|ACAP2_MOUSE	Acap2	sp|Q6ZQK5|ACAP2_MOUSE;sp|Q6ZQK5-2|ACAP2_MOUSE	sp|Q6ZQK5|ACAP2_MOUSE;sp|Q6ZQK5-2|ACAP2_MOUSE	Arf-GAP with coiled-coil, ANK repeat and PH domain-containing protein 2 OS=Mus musculus OX=10090 GN=Acap2 PE=1 SV=2;Isoform 2 of Arf-GAP with coiled-coil, ANK repeat and PH domain-containing protein 2 OS=Mus musculus OX=10090 GN=Acap2	2	7	15.6	87.21	770	0	75.922	0//0	1//0	0//0	89040000	42	12			-1;-1	2120000	2120000	110030000	4.11573e+07	34.0112	0.0542108
sp|Q920G8|MFRN1_MOUSE	Slc25a37	sp|Q920G8|MFRN1_MOUSE;sp|Q920G8-2|MFRN1_MOUSE;sp|Q920G8-4|MFRN1_MOUSE;sp|Q920G8-5|MFRN1_MOUSE;sp|Q920G8-3|MFRN1_MOUSE	sp|Q920G8|MFRN1_MOUSE;sp|Q920G8-2|MFRN1_MOUSE	Mitoferrin-1 OS=Mus musculus OX=10090 GN=Slc25a37 PE=1 SV=1;Isoform 2 of Mitoferrin-1 OS=Mus musculus OX=10090 GN=Slc25a37	5	3	23.4	37.509	338	0	31.26	0//0	1//0	0//0	29526000	14	6			-1;-1;-1;-1;-1	2109000	2109000	36891000	2.29481e+07	33.8347	0.0539295
sp|Q922J9-2|FACR1_MOUSE	Far1	sp|Q922J9-2|FACR1_MOUSE;sp|Q922J9-3|FACR1_MOUSE;sp|Q922J9|FACR1_MOUSE;sp|Q922J9-4|FACR1_MOUSE	sp|Q922J9-2|FACR1_MOUSE;sp|Q922J9-3|FACR1_MOUSE;sp|Q922J9|FACR1_MOUSE;sp|Q922J9-4|FACR1_MOUSE	Isoform 2 of Fatty acyl-CoA reductase 1 OS=Mus musculus OX=10090 GN=Far1;Isoform 3 of Fatty acyl-CoA reductase 1 OS=Mus musculus OX=10090 GN=Far1;Fatty acyl-CoA reductase 1 OS=Mus musculus OX=10090 GN=Far1 PE=1 SV=1;Isoform 4 of Fatty acyl-CoA reductase 1	4	2	8.1	29.508	260	0.00061576	17.757	0//0	1//0	0//0	39715000	19	3			-1;-1;-1;-1	2090300	2090300	54485000	3.08673e+07	33.5347	0.0534514
sp|Q8C754|VPS52_MOUSE	Vps52	sp|Q8C754|VPS52_MOUSE;sp|Q8C754-2|VPS52_MOUSE	sp|Q8C754|VPS52_MOUSE;sp|Q8C754-2|VPS52_MOUSE	Vacuolar protein sorting-associated protein 52 homolog OS=Mus musculus OX=10090 GN=Vps52 PE=1 SV=1;Isoform 2 of Vacuolar protein sorting-associated protein 52 homolog OS=Mus musculus OX=10090 GN=Vps52	2	5	10.2	82.043	723	0	93.261	0//0	1//0	0//0	78820000	38	8			-1;-1	2074200	2074200	103130000	4.71293e+07	33.2764	0.0530397
sp|Q8BHE8|MAIP1_MOUSE	Maip1	sp|Q8BHE8|MAIP1_MOUSE	sp|Q8BHE8|MAIP1_MOUSE	m-AAA protease-interacting protein 1, mitochondrial OS=Mus musculus OX=10090 GN=Maip1 PE=1 SV=1	1	3	11.7	32.985	291	0	35.786	0//0	1//0	0//0	39394000	19	7			-1	2073400	2073400	51513000	3.06176e+07	33.2636	0.0530192
sp|Q8R0X7|SGPL1_MOUSE	Sgpl1	sp|Q8R0X7|SGPL1_MOUSE	sp|Q8R0X7|SGPL1_MOUSE	Sphingosine-1-phosphate lyase 1 OS=Mus musculus OX=10090 GN=Sgpl1 PE=1 SV=1	1	4	10.7	63.676	568	0	37.216	0//0	1//0	0//0	53216000	26	9			-1	2046800	2046800	67577000	3.69175e+07	32.8368	0.052339
sp|Q99KX1|MLF2_MOUSE	Mlf2	sp|Q99KX1|MLF2_MOUSE	sp|Q99KX1|MLF2_MOUSE	Myeloid leukemia factor 2 OS=Mus musculus OX=10090 GN=Mlf2 PE=1 SV=1	1	3	21.9	28.055	247	0	19.315	0//0	1//0	0//0	20429000	10	4			-1	2042900	2042900	24515000	1.58779e+07	32.7743	0.0522393
sp|Q3U829|AP5Z1_MOUSE	Ap5z1	sp|Q3U829|AP5Z1_MOUSE	sp|Q3U829|AP5Z1_MOUSE	AP-5 complex subunit zeta-1 OS=Mus musculus OX=10090 GN=Ap5z1 PE=2 SV=1	1	7	10.8	89.406	807	0	80.338	0//0	1//0	0//0	79107000	39	13			-1	2028400	2028400	100060000	5.04757e+07	32.5417	0.0518685
sp|Q9CRA8|EXOS5_MOUSE	Exosc5	sp|Q9CRA8|EXOS5_MOUSE	sp|Q9CRA8|EXOS5_MOUSE	Exosome complex component RRP46 OS=Mus musculus OX=10090 GN=Exosc5 PE=1 SV=1	1	4	20	25.194	235	0	42.99	0//0	1//0	0//0	18220000	9	4			-1	2024400	2024400	24387000	1.41607e+07	32.4775	0.0517662
sp|Q9WTK3|GPAA1_MOUSE	Gpaa1	sp|Q9WTK3|GPAA1_MOUSE	sp|Q9WTK3|GPAA1_MOUSE	Glycosylphosphatidylinositol anchor attachment 1 protein OS=Mus musculus OX=10090 GN=Gpaa1 PE=1 SV=3	1	3	6	67.948	621	0	37.88	0//0	1//0	0//0	40367000	20	3			-1	2018400	2018400	51024000	3.13741e+07	32.3812	0.0516128
sp|Q06890|CLUS_MOUSE	Clu	sp|Q06890|CLUS_MOUSE	sp|Q06890|CLUS_MOUSE	Clusterin OS=Mus musculus OX=10090 GN=Clu PE=1 SV=1	1	4	11.8	51.655	448	0	30.125	0//0	1//0	0//0	38193000	19	6			-1	2010100	2010100	48571000	2.54202e+07	32.2481	0.0514006
sp|P35821|PTN1_MOUSE	Ptpn1	sp|P35821|PTN1_MOUSE	sp|P35821|PTN1_MOUSE	Tyrosine-protein phosphatase non-receptor type 1 OS=Mus musculus OX=10090 GN=Ptpn1 PE=1 SV=2	1	4	15	49.593	432	0	26.5	0//0	1//0	0//0	48198000	24	5			-1	2008200	2008200	60944000	3.30015e+07	32.2176	0.051352
sp|Q9Z127|LAT1_MOUSE	Slc7a5	sp|Q9Z127|LAT1_MOUSE	sp|Q9Z127|LAT1_MOUSE	Large neutral amino acids transporter small subunit 1 OS=Mus musculus OX=10090 GN=Slc7a5 PE=1 SV=2	1	2	5.9	55.872	512	0.0011751	15.057	0//0	1//0	0//0	31322000	16	4			-1	1957600	1957600	40838000	2.43439e+07	31.4058	0.0500581
sp|Q8BHC4|DCAKD_MOUSE	Dcakd	sp|Q8BHC4|DCAKD_MOUSE	sp|Q8BHC4|DCAKD_MOUSE	Dephospho-CoA kinase domain-containing protein OS=Mus musculus OX=10090 GN=Dcakd PE=1 SV=1	1	3	19.9	26.476	231	0	26.644	0//0	1//0	0//0	25416000	13	1			-1	1955100	1955100	30919000	1.97535e+07	31.3657	0.0499941
sp|Q9D4H1|EXOC2_MOUSE	Exoc2	sp|Q9D4H1|EXOC2_MOUSE	sp|Q9D4H1|EXOC2_MOUSE	Exocyst complex component 2 OS=Mus musculus OX=10090 GN=Exoc2 PE=1 SV=1	1	8	13.1	103.96	924	0	56.851	0//0	1//0	0//0	87493000	45	11			-1	1944300	1944300	111450000	4.20031e+07	31.1924	0.049718
sp|O55102|BL1S1_MOUSE	Bloc1s1	sp|O55102|BL1S1_MOUSE	sp|O55102|BL1S1_MOUSE	Biogenesis of lysosome-related organelles complex 1 subunit 1 OS=Mus musculus OX=10090 GN=Bloc1s1 PE=1 SV=2	1	2	32	14.281	125	0	32.522	0//0	1//0	0//0	13437000	7	5			-1	1919500	1919500	16581000	1.04432e+07	30.7946	0.0490838
sp|Q9R049-2|AMFR_MOUSE	Amfr	sp|Q9R049-2|AMFR_MOUSE;sp|Q9R049|AMFR_MOUSE	sp|Q9R049-2|AMFR_MOUSE;sp|Q9R049|AMFR_MOUSE	Isoform 2 of E3 ubiquitin-protein ligase AMFR OS=Mus musculus OX=10090 GN=Amfr;E3 ubiquitin-protein ligase AMFR OS=Mus musculus OX=10090 GN=Amfr PE=1 SV=2	2	5	11.7	72.752	639	0	40.744	0//0	1//0	0//0	53639000	28	8			-1;-1	1915700	1915700	69471000	3.38014e+07	30.7336	0.0489866
sp|Q6P9J9|ANO6_MOUSE	Ano6	sp|Q6P9J9|ANO6_MOUSE	sp|Q6P9J9|ANO6_MOUSE	Anoctamin-6 OS=Mus musculus OX=10090 GN=Ano6 PE=1 SV=1	1	6	10.6	106.25	911	0	55.992	0//0	1//0	0//0	72670000	38	10			-1	1912400	1912400	91286000	4.68312e+07	30.6807	0.0489023
sp|Q5SUA5|MYO1G_MOUSE	Myo1g	sp|Q5SUA5|MYO1G_MOUSE;sp|Q5SYD0-2|MYO1D_MOUSE;sp|Q5SYD0|MYO1D_MOUSE	sp|Q5SUA5|MYO1G_MOUSE	Unconventional myosin-Ig OS=Mus musculus OX=10090 GN=Myo1g PE=1 SV=1	3	10	12.6	117.23	1024	0	85.989	0//0	1//0	0//0	107630000	57	20			-1;-1;-1	1888200	1888200	136790000	3.32826e+07	30.2924	0.0482834
sp|Q61235|SNTB2_MOUSE	Sntb2	sp|Q61235|SNTB2_MOUSE	sp|Q61235|SNTB2_MOUSE	Beta-2-syntrophin OS=Mus musculus OX=10090 GN=Sntb2 PE=1 SV=2	1	6	14.2	56.381	520	0	45.097	0//0	1//0	0//0	49070000	26	11			-1	1887300	1887300	63943000	2.58264e+07	30.278	0.0482604
sp|Q8VE99|CC115_MOUSE	Ccdc115	sp|Q8VE99|CC115_MOUSE	sp|Q8VE99|CC115_MOUSE	Coiled-coil domain-containing protein 115 OS=Mus musculus OX=10090 GN=Ccdc115 PE=1 SV=1	1	3	21.7	19.742	180	0	26.563	0//0	1//0	0//0	22335000	12	2			-1	1861200	1861200	28382000	1.73589e+07	29.8593	0.047593
sp|Q9ERG2|STRN3_MOUSE	Strn3	sp|Q9ERG2|STRN3_MOUSE	sp|Q9ERG2|STRN3_MOUSE	Striatin-3 OS=Mus musculus OX=10090 GN=Strn3 PE=1 SV=1	1	6	11.7	87.149	796	0	114.58	0//0	1//0	0//0	49542000	27	7			-1	1834900	1834900	60910000	2.46137e+07	29.4373	0.0469205
sp|Q8BXA5|CLP1L_MOUSE	Clptm1l	sp|Q8BXA5|CLP1L_MOUSE	sp|Q8BXA5|CLP1L_MOUSE	Cleft lip and palate transmembrane protein 1-like protein OS=Mus musculus OX=10090 GN=Clptm1l PE=1 SV=1	1	3	9.1	62.183	539	0	45.056	0//0	1//0	0//0	38077000	21	6			-1	1813200	1813200	50784000	2.95938e+07	29.0892	0.0463656
sp|Q9R0A0|PEX14_MOUSE	Pex14	sp|Q9R0A0|PEX14_MOUSE	sp|Q9R0A0|PEX14_MOUSE	Peroxisomal membrane protein PEX14 OS=Mus musculus OX=10090 GN=Pex14 PE=1 SV=1	1	2	6.9	41.207	376	0.0011628	14.415	0//0	1//0	0//0	27148000	15	4			-1	1809900	1809900	33770000	2.10996e+07	29.0363	0.0462812
sp|Q924C1|XPO5_MOUSE	Xpo5	sp|Q924C1|XPO5_MOUSE;sp|Q924C1-2|XPO5_MOUSE;sp|Q924C1-3|XPO5_MOUSE	sp|Q924C1|XPO5_MOUSE;sp|Q924C1-2|XPO5_MOUSE	Exportin-5 OS=Mus musculus OX=10090 GN=Xpo5 PE=1 SV=1;Isoform 2 of Exportin-5 OS=Mus musculus OX=10090 GN=Xpo5	3	12	15.1	136.97	1204	0	116.3	0//0	1//0	0//0	102930000	57	18			-1;-1;-1	1805700	1805700	129800000	4.01497e+07	28.9689	0.0461738
sp|Q91W34|RUSF1_MOUSE	Rusf1	sp|Q91W34|RUSF1_MOUSE;sp|Q91W34-2|RUSF1_MOUSE	sp|Q91W34|RUSF1_MOUSE;sp|Q91W34-2|RUSF1_MOUSE	RUS family member 1 OS=Mus musculus OX=10090 GN=Rusf1 PE=1 SV=1;Isoform 2 of RUS family member 1 OS=Mus musculus OX=10090 GN=Rusf1	2	4	13.7	50.469	466	0	33.326	0//0	1//0	0//0	37757000	21	5			-1;-1	1798000	1798000	51525000	2.71019e+07	28.8453	0.0459769
sp|Q9D8B3|CHM4B_MOUSE	Chmp4b	sp|Q9D8B3|CHM4B_MOUSE	sp|Q9D8B3|CHM4B_MOUSE	Charged multivesicular body protein 4b OS=Mus musculus OX=10090 GN=Chmp4b PE=1 SV=2	1	2	18.3	24.936	224	0.0011716	14.862	0//0	1//0	0//0	21425000	12	3			-1	1785400	1785400	26041000	1.66516e+07	28.6432	0.0456547
sp|O35387|HAX1_MOUSE	Hax1	sp|O35387|HAX1_MOUSE	sp|O35387|HAX1_MOUSE	HCLS1-associated protein X-1 OS=Mus musculus OX=10090 GN=Hax1 PE=1 SV=1	1	2	7.1	31.654	280	0.0011236	12.975	0//0	1//0	0//0	26655000	15	2			-1	1777000	1777000	33681000	2.07165e+07	28.5084	0.0454399
sp|Q9Z266|SNAPN_MOUSE	Snapin	sp|Q9Z266|SNAPN_MOUSE	sp|Q9Z266|SNAPN_MOUSE	SNARE-associated protein Snapin OS=Mus musculus OX=10090 GN=Snapin PE=1 SV=1	1	2	34.6	14.904	136	0	24.466	0//0	1//0	0//0	14006000	8	5			-1	1750700	1750700	19946000	1.08855e+07	28.0865	0.0447674
sp|O54984|GET3_MOUSE	Get3	sp|O54984|GET3_MOUSE	sp|O54984|GET3_MOUSE	ATPase GET3 OS=Mus musculus OX=10090 GN=Get3 PE=1 SV=2	1	4	18.1	38.822	348	0	22.96	0//0	1//0	0//0	26006000	15	5			-1	1733700	1733700	31168000	2.0212e+07	27.8138	0.0443327
sp|Q9Z1D1|EIF3G_MOUSE	Eif3g	sp|Q9Z1D1|EIF3G_MOUSE	sp|Q9Z1D1|EIF3G_MOUSE	Eukaryotic translation initiation factor 3 subunit G OS=Mus musculus OX=10090 GN=Eif3g PE=1 SV=2	1	3	14.1	35.638	320	0	29.097	0//0	1//0	0//0	28669000	17	8			-1	1686400	1686400	36975000	2.22821e+07	27.0549	0.0431232
sp|Q9QYJ3|DNJB1_MOUSE	Dnajb1	sp|Q9QYJ3|DNJB1_MOUSE	sp|Q9QYJ3|DNJB1_MOUSE	DnaJ homolog subfamily B member 1 OS=Mus musculus OX=10090 GN=Dnajb1 PE=1 SV=3	1	5	19.4	38.167	340	0	51.337	0//0	1//0	1//0	33587000	20	9			-1	1679300	1679300	42231000	2.36666e+07	26.941	0.0429416
sp|O09061|PSB1_MOUSE	Psmb1	sp|O09061|PSB1_MOUSE	sp|O09061|PSB1_MOUSE	Proteasome subunit beta type-1 OS=Mus musculus OX=10090 GN=Psmb1 PE=1 SV=1	1	3	20	26.372	240	0	35.97	0//0	1//0	0//0	21528000	13	2			-1	1656000	1656000	26245000	1.67321e+07	26.5672	0.0423458
sp|P14094|AT1B1_MOUSE	Atp1b1	sp|P14094|AT1B1_MOUSE	sp|P14094|AT1B1_MOUSE	Sodium/potassium-transporting ATPase subunit beta-1 OS=Mus musculus OX=10090 GN=Atp1b1 PE=1 SV=1	1	2	8.2	35.194	304	0.0011587	14.329	0//0	1//0	0//0	24822000	15	6			-1	1654800	1654800	31597000	1.92917e+07	26.548	0.0423151
sp|Q8C0E2|VP26B_MOUSE	Vps26b	sp|Q8C0E2|VP26B_MOUSE;sp|Q8C0E2-2|VP26B_MOUSE	sp|Q8C0E2|VP26B_MOUSE	Vacuolar protein sorting-associated protein 26B OS=Mus musculus OX=10090 GN=Vps26b PE=1 SV=1	2	3	10.7	39.124	336	0	18.866	0//0	1//0	0//0	29629000	18	5			-1;-1	1646100	1646100	36640000	2.30281e+07	26.4084	0.0420927
sp|Q8BZQ7|ANC2_MOUSE	Anapc2	sp|Q8BZQ7|ANC2_MOUSE	sp|Q8BZQ7|ANC2_MOUSE	Anaphase-promoting complex subunit 2 OS=Mus musculus OX=10090 GN=Anapc2 PE=1 SV=2	1	5	9.1	95.306	837	0	40.971	0//0	1//0	0//0	56677000	35	6			-1	1619300	1619300	72166000	3.92787e+07	25.9785	0.0414074
sp|Q3TPX4|EXOC5_MOUSE	Exoc5	sp|Q3TPX4|EXOC5_MOUSE	sp|Q3TPX4|EXOC5_MOUSE	Exocyst complex component 5 OS=Mus musculus OX=10090 GN=Exoc5 PE=1 SV=2	1	5	12.4	81.737	708	0	46.017	0//0	1//0	0//0	65959000	41	9			-1	1608800	1608800	84972000	4.07551e+07	25.81	0.0411389
sp|Q91X83|METK1_MOUSE	Mat1a	sp|Q91X83|METK1_MOUSE	sp|Q91X83|METK1_MOUSE	S-adenosylmethionine synthase isoform type-1 OS=Mus musculus OX=10090 GN=Mat1a PE=1 SV=1	1	2	14.1	43.508	396	0.0011541	14.128	0//1	1//0	0//1	27257000	17	4			-1	1603300	1603300	35087000	2.11843e+07	25.7218	0.0409982
sp|Q9JIW9|RALB_MOUSE	Ralb	sp|Q9JIW9|RALB_MOUSE	sp|Q9JIW9|RALB_MOUSE	Ras-related protein Ral-B OS=Mus musculus OX=10090 GN=Ralb PE=1 SV=1	1	2	20.9	23.349	206	0	39.448	0//0	1//0	0//1	14386000	9	2			-1	1598400	1598400	17540000	1.11809e+07	25.6432	0.0408729
sp|P36423|THAS_MOUSE	Tbxas1	sp|P36423|THAS_MOUSE	sp|P36423|THAS_MOUSE	Thromboxane-A synthase OS=Mus musculus OX=10090 GN=Tbxas1 PE=1 SV=2	1	5	15	60.39	533	0	31.388	0//0	1//0	0//0	38246000	24	7			-1	1593600	1593600	48965000	1.93776e+07	25.5662	0.0407502
sp|Q9D0M0|EXOS7_MOUSE	Exosc7	sp|Q9D0M0|EXOS7_MOUSE	sp|Q9D0M0|EXOS7_MOUSE	Exosome complex exonuclease RRP42 OS=Mus musculus OX=10090 GN=Exosc7 PE=1 SV=2	1	4	21.3	31.825	291	0	24.84	0//0	1//0	0//0	28498000	18	5			-1	1583200	1583200	34766000	1.88332e+07	25.3993	0.0404842
sp|Q9D287|SPF27_MOUSE	Bcas2	sp|Q9D287|SPF27_MOUSE	sp|Q9D287|SPF27_MOUSE	Pre-mRNA-splicing factor SPF27 OS=Mus musculus OX=10090 GN=Bcas2 PE=1 SV=1	1	2	11.6	26.131	225	0	34.561	0//0	1//0	0//0	20443000	13	4			-1	1572500	1572500	26283000	1.58882e+07	25.2276	0.0402106
sp|Q9CXD6|MCUR1_MOUSE	Mcur1	sp|Q9CXD6|MCUR1_MOUSE;sp|Q9CXD6-3|MCUR1_MOUSE;sp|Q9CXD6-2|MCUR1_MOUSE	sp|Q9CXD6|MCUR1_MOUSE;sp|Q9CXD6-3|MCUR1_MOUSE;sp|Q9CXD6-2|MCUR1_MOUSE	Mitochondrial calcium uniporter regulator 1 OS=Mus musculus OX=10090 GN=Mcur1 PE=1 SV=1;Isoform 3 of Mitochondrial calcium uniporter regulator 1 OS=Mus musculus OX=10090 GN=Mcur1;Isoform 2 of Mitochondrial calcium uniporter regulator 1 OS=Mus musculus OX=1	3	4	13.8	37.849	340	0	25.961	0//0	1//0	0//0	34197000	22	5			-1;-1;-1	1554400	1554400	43483000	2.49519e+07	24.9373	0.0397478
sp|Q9JL56|GDE1_MOUSE	Gde1	sp|Q9JL56|GDE1_MOUSE	sp|Q9JL56|GDE1_MOUSE	Glycerophosphodiester phosphodiesterase 1 OS=Mus musculus OX=10090 GN=Gde1 PE=1 SV=1	1	4	19.6	37.629	331	0	27	0//0	1//0	0//0	29148000	19	6			-1	1534100	1534100	34866000	1.80684e+07	24.6116	0.0392287
sp|Q8VI75|IPO4_MOUSE	Ipo4	sp|Q8VI75|IPO4_MOUSE	sp|Q8VI75|IPO4_MOUSE	Importin-4 OS=Mus musculus OX=10090 GN=Ipo4 PE=1 SV=1	1	7	7.9	119.27	1082	0	77.401	0//0	1//0	0//0	68965000	45	13			-1	1532600	1532600	89583000	3.32047e+07	24.5875	0.0391903
sp|Q9JKK1-2|STX6_MOUSE	Stx6	sp|Q9JKK1-2|STX6_MOUSE;sp|Q9JKK1|STX6_MOUSE	sp|Q9JKK1-2|STX6_MOUSE;sp|Q9JKK1|STX6_MOUSE	Isoform 2 of Syntaxin-6 OS=Mus musculus OX=10090 GN=Stx6;Syntaxin-6 OS=Mus musculus OX=10090 GN=Stx6 PE=1 SV=1	2	4	32.2	29.155	255	0	53.295	0//0	1//0	0//0	18319000	12	4			-1;-1	1526600	1526600	20758000	1.22124e+07	24.4913	0.0390369
sp|Q9D7V9|NAAA_MOUSE	Naaa	sp|Q9D7V9|NAAA_MOUSE	sp|Q9D7V9|NAAA_MOUSE	N-acylethanolamine-hydrolyzing acid amidase OS=Mus musculus OX=10090 GN=Naaa PE=1 SV=2	1	3	13.8	40.074	362	0	34.526	0//0	1//0	0//0	22755000	15	5			-1	1517000	1517000	27904000	1.7686e+07	24.3373	0.0387914
sp|Q8R3I3|COG6_MOUSE	Cog6	sp|Q8R3I3|COG6_MOUSE	sp|Q8R3I3|COG6_MOUSE	Conserved oligomeric Golgi complex subunit 6 OS=Mus musculus OX=10090 GN=Cog6 PE=1 SV=2	1	4	9.4	73.039	657	0	57.782	0//0	1//0	0//0	48375000	32	9			-1	1511700	1511700	62974000	3.58408e+07	24.2522	0.0386559
sp|Q3U1J0-2|S38A5_MOUSE	Slc38a5	sp|Q3U1J0-2|S38A5_MOUSE;sp|Q3U1J0|S38A5_MOUSE	sp|Q3U1J0-2|S38A5_MOUSE;sp|Q3U1J0|S38A5_MOUSE	Isoform 2 of Sodium-coupled neutral amino acid transporter 5 OS=Mus musculus OX=10090 GN=Slc38a5;Sodium-coupled neutral amino acid transporter 5 OS=Mus musculus OX=10090 GN=Slc38a5 PE=1 SV=1	2	2	3.4	51.883	471	0.0021906	12.194	0//0	1//0	0//0	24120000	16	3			-1;-1	1507500	1507500	30684000	1.87466e+07	24.1848	0.0385485
sp|Q60953-2|PML_MOUSE	Pml	sp|Q60953-2|PML_MOUSE;sp|Q60953|PML_MOUSE	sp|Q60953-2|PML_MOUSE;sp|Q60953|PML_MOUSE	Isoform 2 of Protein PML OS=Mus musculus OX=10090 GN=Pml;Protein PML OS=Mus musculus OX=10090 GN=Pml PE=1 SV=3	2	5	8.8	93.262	839	0	38.297	0//0	1//0	0//0	57206000	38	8			-1;-1	1505400	1505400	75586000	3.21409e+07	24.1512	0.0384948
sp|Q8BJL1|FBX30_MOUSE	Fbxo30	sp|Q8BJL1|FBX30_MOUSE	sp|Q8BJL1|FBX30_MOUSE	F-box only protein 30 OS=Mus musculus OX=10090 GN=Fbxo30 PE=1 SV=2	1	3	5.5	82.687	746	0	41.539	0//0	1//0	0//0	49411000	33	7			-1	1497300	1497300	62393000	3.84027e+07	24.0212	0.0382877
sp|E9Q7X7|NRX2A_MOUSE	Nrxn2	sp|E9Q7X7|NRX2A_MOUSE	sp|E9Q7X7|NRX2A_MOUSE	Neurexin-2 OS=Mus musculus OX=10090 GN=Nrxn2 PE=1 SV=1	1	2	1.7	184.88	1710	0.0036477	10.155	0//0	1//0	0//0	119770000	80	2			-1	1497100	1497100	156520000	9.30869e+07	24.018	0.0382826
sp|Q8VH51-3|RBM39_MOUSE	Rbm39	sp|Q8VH51-3|RBM39_MOUSE;sp|Q8VH51-2|RBM39_MOUSE;sp|Q8VH51|RBM39_MOUSE	sp|Q8VH51-3|RBM39_MOUSE;sp|Q8VH51-2|RBM39_MOUSE;sp|Q8VH51|RBM39_MOUSE	Isoform 3 of RNA-binding protein 39 OS=Mus musculus OX=10090 GN=Rbm39;Isoform 2 of RNA-binding protein 39 OS=Mus musculus OX=10090 GN=Rbm39;RNA-binding protein 39 OS=Mus musculus OX=10090 GN=Rbm39 PE=1 SV=2	3	4	14.2	39.818	367	0	27.618	0//0	1//0	0//0	26794000	18	4			-1;-1;-1	1488600	1488600	34384000	1.94791e+07	23.8816	0.0380652
sp|O88967|YMEL1_MOUSE	Yme1l1	sp|O88967|YMEL1_MOUSE	sp|O88967|YMEL1_MOUSE	ATP-dependent zinc metalloprotease YME1L1 OS=Mus musculus OX=10090 GN=Yme1l1 PE=1 SV=1	1	8	18.7	80.027	715	0	72.073	0//0	1//0	0//0	56442000	38	12			-1	1485300	1485300	71920000	3.28045e+07	23.8287	0.0379808
sp|Q8C0L8|COG5_MOUSE	Cog5	sp|Q8C0L8|COG5_MOUSE	sp|Q8C0L8|COG5_MOUSE	Conserved oligomeric Golgi complex subunit 5 OS=Mus musculus OX=10090 GN=Cog5 PE=1 SV=3	1	4	7.1	91.39	829	0	38.392	0//0	1//0	0//0	57860000	39	6			-1	1483600	1483600	72868000	4.13843e+07	23.8014	0.0379374
sp|Q99KI3|EMC3_MOUSE	Emc3	sp|Q99KI3|EMC3_MOUSE	sp|Q99KI3|EMC3_MOUSE	ER membrane protein complex subunit 3 OS=Mus musculus OX=10090 GN=Emc3 PE=1 SV=3	1	2	8.8	29.98	261	0.0021633	11.721	0//0	1//0	0//0	19239000	13	3			-1	1479900	1479900	23953000	1.49525e+07	23.7421	0.0378427
sp|P53702|CCHL_MOUSE	Hccs	sp|P53702|CCHL_MOUSE	sp|P53702|CCHL_MOUSE	Holocytochrome c-type synthase OS=Mus musculus OX=10090 GN=Hccs PE=1 SV=2	1	4	22.8	30.977	272	0	30.947	0//0	1//0	0//0	20716000	14	6			-1	1479700	1479700	25612000	1.46061e+07	23.7389	0.0378376
sp|Q3UVL4|VPS51_MOUSE	Vps51	sp|Q3UVL4|VPS51_MOUSE;sp|Q3UVL4-2|VPS51_MOUSE;sp|Q3UVL4-3|VPS51_MOUSE	sp|Q3UVL4|VPS51_MOUSE;sp|Q3UVL4-2|VPS51_MOUSE	Vacuolar protein sorting-associated protein 51 homolog OS=Mus musculus OX=10090 GN=Vps51 PE=1 SV=2;Isoform 2 of Vacuolar protein sorting-associated protein 51 homolog OS=Mus musculus OX=10090 GN=Vps51	3	5	8.2	86.186	782	0	112.88	0//0	1//0	0//0	59948000	41	12			-1;-1;-1	1462200	1462200	76906000	3.46011e+07	23.4581	0.0373901
sp|Q3UI43|BABA1_MOUSE	Babam1	sp|Q3UI43|BABA1_MOUSE	sp|Q3UI43|BABA1_MOUSE	BRISC and BRCA1-A complex member 1 OS=Mus musculus OX=10090 GN=Babam1 PE=1 SV=1	1	2	13.2	36.793	333	0	22.942	0//0	1//0	0//0	20453000	14	2			-1	1461000	1461000	26567000	1.58967e+07	23.4388	0.0373594
sp|Q9CQ22|LTOR1_MOUSE	Lamtor1	sp|Q9CQ22|LTOR1_MOUSE	sp|Q9CQ22|LTOR1_MOUSE	Ragulator complex protein LAMTOR1 OS=Mus musculus OX=10090 GN=Lamtor1 PE=1 SV=1	1	2	27.3	17.749	161	0.0011192	12.935	0//0	1//0	0//0	13116000	9	1			-1	1457300	1457300	18310000	1.0194e+07	23.3795	0.0372648
sp|Q6PB93-2|GALT2_MOUSE	Galnt2	sp|Q6PB93-2|GALT2_MOUSE;sp|Q6PB93|GALT2_MOUSE	sp|Q6PB93-2|GALT2_MOUSE;sp|Q6PB93|GALT2_MOUSE	Isoform 2 of Polypeptide N-acetylgalactosaminyltransferase 2 OS=Mus musculus OX=10090 GN=Galnt2;Polypeptide N-acetylgalactosaminyltransferase 2 OS=Mus musculus OX=10090 GN=Galnt2 PE=1 SV=1	2	6	15.5	60.985	536	0	78.896	0//0	1//0	0//0	46587000	32	11			-1;-1	1455900	1455900	57793000	2.68383e+07	23.357	0.037229
sp|Q9JJY4|DDX20_MOUSE	Ddx20	sp|Q9JJY4|DDX20_MOUSE	sp|Q9JJY4|DDX20_MOUSE	Probable ATP-dependent RNA helicase DDX20 OS=Mus musculus OX=10090 GN=Ddx20 PE=1 SV=2	1	6	12	91.709	825	0	50.145	0//0	1//0	0//0	59698000	42	12			-1	1421400	1421400	77008000	3.91445e+07	22.8035	0.0363468
sp|Q9CQ56|USE1_MOUSE	Use1	sp|Q9CQ56|USE1_MOUSE;sp|Q9CQ56-2|USE1_MOUSE	sp|Q9CQ56|USE1_MOUSE	Vesicle transport protein USE1 OS=Mus musculus OX=10090 GN=Use1 PE=1 SV=1	2	4	22.6	30.593	270	0	26.671	0//0	1//0	0//0	26572000	19	5			-1;-1	1398500	1398500	38854000	1.70248e+07	22.4362	0.0357612
sp|Q7TSI3|PP6R1_MOUSE	Ppp6r1	sp|Q7TSI3|PP6R1_MOUSE	sp|Q7TSI3|PP6R1_MOUSE	Serine/threonine-protein phosphatase 6 regulatory subunit 1 OS=Mus musculus OX=10090 GN=Ppp6r1 PE=1 SV=1	1	6	13.9	94.526	856	0	43.542	0//0	1//0	0//0	48910000	35	8			-1	1397400	1397400	62566000	2.77353e+07	22.4185	0.0357331
sp|Q8BH79-2|ANO10_MOUSE	Ano10	sp|Q8BH79-2|ANO10_MOUSE;sp|Q8BH79|ANO10_MOUSE;sp|Q8BH79-4|ANO10_MOUSE;sp|Q8BH79-3|ANO10_MOUSE	sp|Q8BH79-2|ANO10_MOUSE;sp|Q8BH79|ANO10_MOUSE;sp|Q8BH79-4|ANO10_MOUSE	Isoform 2 of Anoctamin-10 OS=Mus musculus OX=10090 GN=Ano10;Anoctamin-10 OS=Mus musculus OX=10090 GN=Ano10 PE=1 SV=1;Isoform 4 of Anoctamin-10 OS=Mus musculus OX=10090 GN=Ano10	4	3	6.2	69.262	601	0.0006192	18.056	0//0	1//0	0//0	36260000	26	5			-1;-1;-1;-1	1394600	1394600	47694000	2.81816e+07	22.3736	0.0356615
sp|Q8R1U1|COG4_MOUSE	Cog4	sp|Q8R1U1|COG4_MOUSE	sp|Q8R1U1|COG4_MOUSE	Conserved oligomeric Golgi complex subunit 4 OS=Mus musculus OX=10090 GN=Cog4 PE=1 SV=1	1	4	5.6	88.66	785	0	36.57	0//0	1//0	0//0	57502000	42	6			-1	1369100	1369100	64900000	3.82968e+07	21.9645	0.0350095
sp|Q9DC51|GNAI3_MOUSE	Gnai3	sp|Q9DC51|GNAI3_MOUSE	sp|Q9DC51|GNAI3_MOUSE	Guanine nucleotide-binding protein G(i) subunit alpha-3 OS=Mus musculus OX=10090 GN=Gnai3 PE=1 SV=3	1	2	26.8	40.538	354	0.00059952	16.045	0//0	1//0	0//0	20470000	15	4			-1	1364700	1364700	26109000	1.59097e+07	21.8939	0.0348969
sp|Q9CZE3|RAB32_MOUSE	Rab32	sp|Q9CZE3|RAB32_MOUSE	sp|Q9CZE3|RAB32_MOUSE	Ras-related protein Rab-32 OS=Mus musculus OX=10090 GN=Rab32 PE=1 SV=3	1	2	13.9	25.068	223	0	22.882	0//0	1//0	0//0	19101000	14	3			-1	1364400	1364400	24255000	1.48458e+07	21.8891	0.0348893
sp|Q91WA6|SHRPN_MOUSE	Sharpin	sp|Q91WA6|SHRPN_MOUSE;sp|Q91WA6-2|SHRPN_MOUSE	sp|Q91WA6|SHRPN_MOUSE;sp|Q91WA6-2|SHRPN_MOUSE	Sharpin OS=Mus musculus OX=10090 GN=Sharpin PE=1 SV=1;Isoform 2 of Sharpin OS=Mus musculus OX=10090 GN=Sharpin	2	3	11.8	39.852	380	0	22.044	0//0	1//0	0//0	12259000	9	3			-1;-1	1362100	1362100	16123000	9.52768e+06	21.8522	0.0348305
sp|Q6PEB6|PHOCN_MOUSE	Mob4	sp|Q6PEB6|PHOCN_MOUSE	sp|Q6PEB6|PHOCN_MOUSE	MOB-like protein phocein OS=Mus musculus OX=10090 GN=Mob4 PE=1 SV=1	1	2	17.3	26.032	225	0.0011299	13.217	0//0	1//0	0//0	14856000	11	3			-1	1350600	1350600	19524000	1.15464e+07	21.6677	0.0345364
sp|Q9CXE7|TMED5_MOUSE	Tmed5	sp|Q9CXE7|TMED5_MOUSE	sp|Q9CXE7|TMED5_MOUSE	Transmembrane emp24 domain-containing protein 5 OS=Mus musculus OX=10090 GN=Tmed5 PE=1 SV=1	1	2	8.3	26.172	229	0.0011306	13.257	0//0	1//0	0//0	16142000	12	3			-1	1345200	1345200	22572000	1.25457e+07	21.5811	0.0343983
sp|Q8VDS8|STX18_MOUSE	Stx18	sp|Q8VDS8|STX18_MOUSE;sp|Q8VDS8-3|STX18_MOUSE;sp|Q8VDS8-2|STX18_MOUSE	sp|Q8VDS8|STX18_MOUSE;sp|Q8VDS8-3|STX18_MOUSE;sp|Q8VDS8-2|STX18_MOUSE	Syntaxin-18 OS=Mus musculus OX=10090 GN=Stx18 PE=1 SV=2;Isoform 3 of Syntaxin-18 OS=Mus musculus OX=10090 GN=Stx18;Isoform 2 of Syntaxin-18 OS=Mus musculus OX=10090 GN=Stx18	3	3	12	38.381	334	0	19.523	0//0	1//0	0//0	21034000	16	3			-1;-1;-1	1314600	1314600	27808000	1.63477e+07	21.0902	0.0336158
sp|Q9D892|ITPA_MOUSE	Itpa	sp|Q9D892|ITPA_MOUSE	sp|Q9D892|ITPA_MOUSE	Inosine triphosphate pyrophosphatase OS=Mus musculus OX=10090 GN=Itpa PE=1 SV=2	1	2	16.2	21.897	198	0.0011534	14.121	0//0	1//0	0//0	12966000	10	3			-1	1296600	1296600	16015000	1.00773e+07	20.8014	0.0331555
sp|Q6PA06|ATLA2_MOUSE	Atl2	sp|Q6PA06|ATLA2_MOUSE;sp|Q6PA06-2|ATLA2_MOUSE	sp|Q6PA06|ATLA2_MOUSE;sp|Q6PA06-2|ATLA2_MOUSE	Atlastin-2 OS=Mus musculus OX=10090 GN=Atl2 PE=1 SV=1;Isoform 2 of Atlastin-2 OS=Mus musculus OX=10090 GN=Atl2	2	7	19	66.223	583	0	44.41	0//0	1//0	0//0	29112000	23	8			-1;-1	1265700	1265700	37899000	1.36211e+07	20.3056	0.0323654
sp|P08556|RASN_MOUSE	Nras	sp|P08556|RASN_MOUSE;sp|Q61411-2|RASH_MOUSE;sp|P32883-2|RASK_MOUSE;sp|Q61411|RASH_MOUSE;sp|P32883|RASK_MOUSE	sp|P08556|RASN_MOUSE;sp|Q61411-2|RASH_MOUSE;sp|P32883-2|RASK_MOUSE;sp|Q61411|RASH_MOUSE;sp|P32883|RASK_MOUSE	GTPase NRas OS=Mus musculus OX=10090 GN=Nras PE=1 SV=1;Isoform 2 of GTPase HRas OS=Mus musculus OX=10090 GN=Hras;Isoform 2B of GTPase KRas OS=Mus musculus OX=10090 GN=Kras;GTPase HRas OS=Mus musculus OX=10090 GN=Hras PE=1 SV=2;GTPase KRas OS=Mus musculus O	5	2	10.6	21.199	189	0.0021786	11.992	0//0	1//0	0//0	12646000	10	4			-1;-1;-1;-1;-1	1264600	1264600	16317000	9.82829e+06	20.288	0.0323373
sp|Q61093|CY24B_MOUSE	Cybb	sp|Q61093|CY24B_MOUSE	sp|Q61093|CY24B_MOUSE	Cytochrome b-245 heavy chain OS=Mus musculus OX=10090 GN=Cybb PE=1 SV=1	1	3	8.1	65.304	570	0	30.549	0//0	1//0	0//0	34062000	27	7			-1	1261500	1261500	42070000	2.64731e+07	20.2383	0.032258
sp|Q6A026|PDS5A_MOUSE	Pds5a	sp|Q6A026|PDS5A_MOUSE;sp|Q4VA53-2|PDS5B_MOUSE;sp|Q4VA53|PDS5B_MOUSE;sp|Q4VA53-3|PDS5B_MOUSE	sp|Q6A026|PDS5A_MOUSE	Sister chromatid cohesion protein PDS5 homolog A OS=Mus musculus OX=10090 GN=Pds5a PE=1 SV=3	4	12	13.1	150.33	1332	0	161.82	0//0	1//0	1//0	90711000	72	17			-1;-1;-1;-1	1259900	1259900	116400000	3.71618e+07	20.2126	0.0322171
sp|Q921T2-3|TOIP1_MOUSE	Tor1aip1	sp|Q921T2-3|TOIP1_MOUSE;sp|Q921T2-2|TOIP1_MOUSE;sp|Q921T2|TOIP1_MOUSE	sp|Q921T2-3|TOIP1_MOUSE;sp|Q921T2-2|TOIP1_MOUSE;sp|Q921T2|TOIP1_MOUSE	Isoform 3 of Torsin-1A-interacting protein 1 OS=Mus musculus OX=10090 GN=Tor1aip1;Isoform 2 of Torsin-1A-interacting protein 1 OS=Mus musculus OX=10090 GN=Tor1aip1;Torsin-1A-interacting protein 1 OS=Mus musculus OX=10090 GN=Tor1aip1 PE=1 SV=3	3	3	10.2	58.415	520	0	19.117	0//0	1//0	0//0	35030000	28	4			-1;-1;-1	1251100	1251100	43830000	2.72256e+07	20.0714	0.0319921
sp|Q9CQW0|EMC6_MOUSE	Emc6	sp|Q9CQW0|EMC6_MOUSE	sp|Q9CQW0|EMC6_MOUSE	ER membrane protein complex subunit 6 OS=Mus musculus OX=10090 GN=Emc6 PE=1 SV=1	1	2	20	12.017	110	0.002199	12.298	0//0	1//0	0//0	4999100	4	1			-1	1249800	1249800	6157800	3.88528e+06	20.0506	0.0319588
sp|Q8BMK4|CKAP4_MOUSE	Ckap4	sp|Q8BMK4|CKAP4_MOUSE	sp|Q8BMK4|CKAP4_MOUSE	Cytoskeleton-associated protein 4 OS=Mus musculus OX=10090 GN=Ckap4 PE=1 SV=2	1	7	18.3	63.691	575	0	53.045	0//0	1//0	0//0	42321000	34	12			-1	1244700	1244700	52707000	2.58555e+07	19.9687	0.0318284
sp|Q5SWT3|S2535_MOUSE	Slc25a35	sp|Q5SWT3|S2535_MOUSE	sp|Q5SWT3|S2535_MOUSE	Solute carrier family 25 member 35 OS=Mus musculus OX=10090 GN=Slc25a35 PE=1 SV=2	1	2	6.7	32.63	300	0.0016565	12.414	0//0	1//0	0//0	25838000	21	4			-1	1230400	1230400	34509000	2.00813e+07	19.7393	0.0314627
sp|Q9Z1T6|FYV1_MOUSE	Pikfyve	sp|Q9Z1T6|FYV1_MOUSE;sp|Q9Z1T6-1|FYV1_MOUSE;sp|Q9Z1T6-3|FYV1_MOUSE	sp|Q9Z1T6|FYV1_MOUSE;sp|Q9Z1T6-1|FYV1_MOUSE	1-phosphatidylinositol 3-phosphate 5-kinase OS=Mus musculus OX=10090 GN=Pikfyve PE=1 SV=3;Isoform 2 of 1-phosphatidylinositol 3-phosphate 5-kinase OS=Mus musculus OX=10090 GN=Pikfyve	3	17	11.1	236.87	2097	0	148.75	0//0	1//0	0//0	129010000	105	21			-1;-1;-1	1228700	1228700	164180000	5.17853e+07	19.7121	0.0314193
sp|Q60778|IKBB_MOUSE	Nfkbib	sp|Q60778|IKBB_MOUSE	sp|Q60778|IKBB_MOUSE	NF-kappa-B inhibitor beta OS=Mus musculus OX=10090 GN=Nfkbib PE=1 SV=2	1	2	10	37.965	359	0.0011869	15.471	0//0	1//0	0//0	15897000	13	3			-1	1222800	1222800	22246000	1.23553e+07	19.6174	0.0312684
sp|Q8C079-4|STRP1_MOUSE	Strip1	sp|Q8C079-4|STRP1_MOUSE;sp|Q8C079|STRP1_MOUSE;sp|Q8C079-3|STRP1_MOUSE	sp|Q8C079-4|STRP1_MOUSE;sp|Q8C079|STRP1_MOUSE;sp|Q8C079-3|STRP1_MOUSE	Isoform 4 of Striatin-interacting protein 1 OS=Mus musculus OX=10090 GN=Strip1;Striatin-interacting protein 1 OS=Mus musculus OX=10090 GN=Strip1 PE=1 SV=2;Isoform 3 of Striatin-interacting protein 1 OS=Mus musculus OX=10090 GN=Strip1	3	4	12.1	81.617	711	0	30.744	0//0	1//0	0//0	37624000	31	7			-1;-1;-1	1213700	1213700	48357000	2.92418e+07	19.4714	0.0310357
sp|Q3U9N9|MOT10_MOUSE	Slc16a10	sp|Q3U9N9|MOT10_MOUSE;sp|Q3U9N9-2|MOT10_MOUSE	sp|Q3U9N9|MOT10_MOUSE;sp|Q3U9N9-2|MOT10_MOUSE	Monocarboxylate transporter 10 OS=Mus musculus OX=10090 GN=Slc16a10 PE=1 SV=1;Isoform 2 of Monocarboxylate transporter 10 OS=Mus musculus OX=10090 GN=Slc16a10	2	2	4.9	55.32	512	0.002161	11.708	0//0	1//0	0//0	13349000	11	3			-1;-1	1213500	1213500	17064000	1.0375e+07	19.4682	0.0310306
sp|Q3USZ8|DIK2A_MOUSE	Dipk2a	sp|Q3USZ8|DIK2A_MOUSE	sp|Q3USZ8|DIK2A_MOUSE	Divergent protein kinase domain 2A OS=Mus musculus OX=10090 GN=Dipk2a PE=1 SV=2	1	2	7.2	49.462	430	0.0011758	15.072	0//0	1//0	0//0	22743000	19	3			-1	1197000	1197000	30160000	1.76761e+07	19.2035	0.0306087
sp|Q9CQD1|RAB5A_MOUSE	Rab5a	sp|Q9CQD1|RAB5A_MOUSE	sp|Q9CQD1|RAB5A_MOUSE	Ras-related protein Rab-5A OS=Mus musculus OX=10090 GN=Rab5a PE=1 SV=1	1	2	16.7	23.598	215	0.0011242	12.981	0//0	1//0	0//0	13131000	11	3			-1	1193700	1193700	17000000	1.02055e+07	19.1506	0.0305243
sp|Q80UK8|INT2_MOUSE	Ints2	sp|Q80UK8|INT2_MOUSE;sp|Q80UK8-2|INT2_MOUSE	sp|Q80UK8|INT2_MOUSE;sp|Q80UK8-2|INT2_MOUSE	Integrator complex subunit 2 OS=Mus musculus OX=10090 GN=Ints2 PE=1 SV=2;Isoform 2 of Integrator complex subunit 2 OS=Mus musculus OX=10090 GN=Ints2	2	4	4.7	133.51	1198	0	39.312	0//0	1//0	0//0	55932000	47	10			-1;-1	1190000	1190000	70962000	3.78868e+07	19.0912	0.0304297
sp|Q8VEH5|EPMIP_MOUSE	Epm2aip1	sp|Q8VEH5|EPMIP_MOUSE	sp|Q8VEH5|EPMIP_MOUSE	EPM2A-interacting protein 1 OS=Mus musculus OX=10090 GN=Epm2aip1 PE=1 SV=1	1	3	7.4	70.095	606	0	25.095	0//0	1//0	0//0	33146000	28	5			-1	1183800	1183800	40107000	2.57619e+07	18.9917	0.0302711
sp|Q9DB40|MED27_MOUSE	Med27	sp|Q9DB40|MED27_MOUSE;sp|Q9DB40-2|MED27_MOUSE	sp|Q9DB40|MED27_MOUSE;sp|Q9DB40-2|MED27_MOUSE	Mediator of RNA polymerase II transcription subunit 27 OS=Mus musculus OX=10090 GN=Med27 PE=2 SV=2;Isoform 2 of Mediator of RNA polymerase II transcription subunit 27 OS=Mus musculus OX=10090 GN=Med27	2	2	8.4	35.297	311	0.0011581	14.317	0//0	1//0	0//0	18936000	16	3			-1;-1	1183500	1183500	24950000	1.47169e+07	18.9869	0.0302635
sp|Q91W96|APC4_MOUSE	Anapc4	sp|Q91W96|APC4_MOUSE	sp|Q91W96|APC4_MOUSE	Anaphase-promoting complex subunit 4 OS=Mus musculus OX=10090 GN=Anapc4 PE=1 SV=1	1	5	7.8	91.707	807	0	46.489	0//0	1//0	0//0	41394000	35	9			-1	1182700	1182700	52650000	2.77681e+07	18.9741	0.030243
sp|Q78ZA7|NP1L4_MOUSE	Nap1l4	sp|Q78ZA7|NP1L4_MOUSE	sp|Q78ZA7|NP1L4_MOUSE	Nucleosome assembly protein 1-like 4 OS=Mus musculus OX=10090 GN=Nap1l4 PE=1 SV=1	1	4	24	42.679	375	0	41.058	0//0	1//0	0//0	17590000	15	8			-1	1172700	1172700	22200000	1.18552e+07	18.8136	0.0299873
sp|Q9EPK7|XPO7_MOUSE	Xpo7	sp|Q9EPK7|XPO7_MOUSE;sp|Q9EPK7-2|XPO7_MOUSE	sp|Q9EPK7|XPO7_MOUSE;sp|Q9EPK7-2|XPO7_MOUSE	Exportin-7 OS=Mus musculus OX=10090 GN=Xpo7 PE=1 SV=3;Isoform 2 of Exportin-7 OS=Mus musculus OX=10090 GN=Xpo7	2	5	5.3	123.81	1087	0	51.324	0//0	1//0	0//0	59721000	51	10			-1;-1	1171000	1171000	74953000	4.23351e+07	18.7864	0.0299438
sp|P46737|BRCC3_MOUSE	Brcc3	sp|P46737|BRCC3_MOUSE	sp|P46737|BRCC3_MOUSE	Lys-63-specific deubiquitinase BRCC36 OS=Mus musculus OX=10090 GN=Brcc3 PE=1 SV=1	1	2	7.9	33.34	291	0.0011416	13.695	0//0	1//0	0//0	18721000	16	2			-1	1170100	1170100	24522000	1.455e+07	18.7719	0.0299208
sp|Q91ZR1|RAB4B_MOUSE	Rab4b	sp|Q91ZR1|RAB4B_MOUSE	sp|Q91ZR1|RAB4B_MOUSE	Ras-related protein Rab-4B OS=Mus musculus OX=10090 GN=Rab4b PE=1 SV=2	1	2	10.8	23.629	213	0.0011947	15.898	0//0	1//0	0//0	16305000	14	4			-1	1164600	1164600	21514000	1.26724e+07	18.6837	0.0297802
sp|Q8BNU0|ARMC6_MOUSE	Armc6	sp|Q8BNU0|ARMC6_MOUSE;sp|Q8BNU0-2|ARMC6_MOUSE	sp|Q8BNU0|ARMC6_MOUSE	Armadillo repeat-containing protein 6 OS=Mus musculus OX=10090 GN=Armc6 PE=1 SV=1	2	4	17.7	50.683	468	0	79.579	0//0	1//0	0//0	24233000	21	4			-1;-1	1153900	1153900	28875000	1.88339e+07	18.512	0.0295065
sp|Q924H2|MED15_MOUSE	Med15	sp|Q924H2|MED15_MOUSE	sp|Q924H2|MED15_MOUSE	Mediator of RNA polymerase II transcription subunit 15 OS=Mus musculus OX=10090 GN=Med15 PE=1 SV=3	1	4	8.2	86.606	789	0	27.001	0//0	1//0	0//0	20754000	18	3			-1	1153000	1153000	26021000	1.61307e+07	18.4976	0.0294835
sp|Q69ZN7|MYOF_MOUSE	Myof	sp|Q69ZN7|MYOF_MOUSE;sp|Q69ZN7-4|MYOF_MOUSE;sp|Q69ZN7-3|MYOF_MOUSE;sp|Q69ZN7-2|MYOF_MOUSE	sp|Q69ZN7|MYOF_MOUSE;sp|Q69ZN7-4|MYOF_MOUSE	Myoferlin OS=Mus musculus OX=10090 GN=Myof PE=1 SV=2;Isoform 4 of Myoferlin OS=Mus musculus OX=10090 GN=Myof	4	14	9.5	233.32	2048	0	139.18	0//0	1//0	0//0	139150000	121	25			-1;-1;-1;-1	1150000	1150000	173600000	5.09994e+07	18.4495	0.0294068
sp|Q9CRA9-2|FGOP2_MOUSE	Fgfr1op2	sp|Q9CRA9-2|FGOP2_MOUSE;sp|Q9CRA9|FGOP2_MOUSE	sp|Q9CRA9-2|FGOP2_MOUSE;sp|Q9CRA9|FGOP2_MOUSE	Isoform 2 of FGFR1 oncogene partner 2 homolog OS=Mus musculus OX=10090 GN=Fgfr1op2;FGFR1 oncogene partner 2 homolog OS=Mus musculus OX=10090 GN=Fgfr1op2 PE=1 SV=1	2	2	12.6	24.95	215	0.0021356	11.221	0//0	1//0	0//0	14925000	13	2			-1;-1	1148100	1148100	17583000	1.15998e+07	18.419	0.0293582
sp|Q99K70|RRAGC_MOUSE	Rragc	sp|Q99K70|RRAGC_MOUSE;sp|Q99K70-2|RRAGC_MOUSE;sp|Q7TT45|RRAGD_MOUSE	sp|Q99K70|RRAGC_MOUSE;sp|Q99K70-2|RRAGC_MOUSE;sp|Q7TT45|RRAGD_MOUSE	Ras-related GTP-binding protein C OS=Mus musculus OX=10090 GN=Rragc PE=1 SV=1;Isoform 2 of Ras-related GTP-binding protein C OS=Mus musculus OX=10090 GN=Rragc;Ras-related GTP-binding protein D OS=Mus musculus OX=10090 GN=Rragd PE=1 SV=2	3	2	5.3	44.12	398	0.0011086	12.544	0//0	1//0	0//0	21492000	19	3			-1;-1;-1	1131100	1131100	28044000	1.67035e+07	18.1463	0.0289235
sp|Q9JIQ3|DBLOH_MOUSE	Diablo	sp|Q9JIQ3|DBLOH_MOUSE	sp|Q9JIQ3|DBLOH_MOUSE	Diablo homolog, mitochondrial OS=Mus musculus OX=10090 GN=Diablo PE=1 SV=2	1	2	8.4	26.82	237	0.002187	12.121	0//0	1//0	0//0	14664000	13	3			-1	1128000	1128000	18875000	1.13967e+07	18.0965	0.0288443
sp|Q9Z2I0|LETM1_MOUSE	Letm1	sp|Q9Z2I0|LETM1_MOUSE	sp|Q9Z2I0|LETM1_MOUSE	Mitochondrial proton/calcium exchanger protein OS=Mus musculus OX=10090 GN=Letm1 PE=1 SV=1	1	6	12.3	82.988	738	0	47.092	0//0	1//0	0//0	41616000	38	7			-1	1095200	1095200	52986000	2.09634e+07	17.5703	0.0280055
sp|P70333|HNRH2_MOUSE	Hnrnph2	sp|P70333|HNRH2_MOUSE	sp|P70333|HNRH2_MOUSE	Heterogeneous nuclear ribonucleoprotein H2 OS=Mus musculus OX=10090 GN=Hnrnph2 PE=1 SV=1	1	2	24.7	49.279	449	0	18.72	0//1	1//0	0//1	19441000	18	5			-1	1080100	1080100	25517000	1.51099e+07	17.3281	0.0276194
sp|Q99LI2|CLCC1_MOUSE	Clcc1	sp|Q99LI2|CLCC1_MOUSE	sp|Q99LI2|CLCC1_MOUSE	Chloride channel CLIC-like protein 1 OS=Mus musculus OX=10090 GN=Clcc1 PE=1 SV=1	1	2	5.4	60.621	539	0.0021097	10.692	0//0	1//0	0//0	28001000	26	1			-1	1077000	1077000	34431000	2.17628e+07	17.2783	0.0275401
sp|Q61070|EI24_MOUSE	Ei24	sp|Q61070|EI24_MOUSE	sp|Q61070|EI24_MOUSE	Etoposide-induced protein 2.4 OS=Mus musculus OX=10090 GN=Ei24 PE=1 SV=3	1	2	6.2	38.932	340	0.0021075	10.677	0//0	1//0	0//0	13896000	13	1			-1	1068900	1068900	16143000	1.08003e+07	17.1484	0.027333
sp|P58404-2|STRN4_MOUSE	Strn4	sp|P58404-2|STRN4_MOUSE;sp|P58404|STRN4_MOUSE	sp|P58404-2|STRN4_MOUSE;sp|P58404|STRN4_MOUSE	Isoform 2 of Striatin-4 OS=Mus musculus OX=10090 GN=Strn4;Striatin-4 OS=Mus musculus OX=10090 GN=Strn4 PE=1 SV=2	2	4	10.5	80.974	753	0	24.427	0//0	1//0	0//0	23380000	22	4			-1;-1	1062700	1062700	29959000	1.44628e+07	17.0489	0.0271745
sp|O70572|NSMA_MOUSE	Smpd2	sp|O70572|NSMA_MOUSE	sp|O70572|NSMA_MOUSE	Sphingomyelin phosphodiesterase 2 OS=Mus musculus OX=10090 GN=Smpd2 PE=1 SV=1	1	3	8.6	47.466	419	0.00060569	16.95	0//0	1//0	0//0	26535000	25	6			-1	1061400	1061400	35331000	2.0623e+07	17.0281	0.0271412
sp|Q9EQH4-5|TAF8_MOUSE	Taf8	sp|Q9EQH4-5|TAF8_MOUSE;sp|Q9EQH4-3|TAF8_MOUSE;sp|Q9EQH4-2|TAF8_MOUSE;sp|Q9EQH4|TAF8_MOUSE;sp|Q9EQH4-4|TAF8_MOUSE	sp|Q9EQH4-5|TAF8_MOUSE;sp|Q9EQH4-3|TAF8_MOUSE;sp|Q9EQH4-2|TAF8_MOUSE;sp|Q9EQH4|TAF8_MOUSE;sp|Q9EQH4-4|TAF8_MOUSE	Isoform 5 of Transcription initiation factor TFIID subunit 8 OS=Mus musculus OX=10090 GN=Taf8;Isoform 3 of Transcription initiation factor TFIID subunit 8 OS=Mus musculus OX=10090 GN=Taf8;Isoform 2 of Transcription initiation factor TFIID subunit 8 OS=Mus	5	2	14.5	24.361	221	0	20.494	0//0	1//0	0//0	11633000	11	1			-1;-1;-1;-1;-1	1057500	1057500	14554000	9.04116e+06	16.9655	0.0270415
sp|P52332|JAK1_MOUSE	Jak1	sp|P52332|JAK1_MOUSE	sp|P52332|JAK1_MOUSE	Tyrosine-protein kinase JAK1 OS=Mus musculus OX=10090 GN=Jak1 PE=1 SV=1	1	2	2.2	133.37	1153	0.0036496	10.174	0//0	1//0	0//0	68313000	65	3			-1	1051000	1051000	91396000	5.30935e+07	16.8612	0.0268753
sp|Q9D733|GP2_MOUSE	Gp2	sp|Q9D733|GP2_MOUSE	sp|Q9D733|GP2_MOUSE	Pancreatic secretory granule membrane major glycoprotein GP2 OS=Mus musculus OX=10090 GN=Gp2 PE=1 SV=3	1	2	3.8	59.153	531	0.0021277	11.01	0//0	1//0	0//0	19907000	19	4			-1	1047700	1047700	24981000	1.54716e+07	16.8083	0.0267909
sp|Q3UJU9|RMD3_MOUSE	Rmdn3	sp|Q3UJU9|RMD3_MOUSE	sp|Q3UJU9|RMD3_MOUSE	Regulator of microtubule dynamics protein 3 OS=Mus musculus OX=10090 GN=Rmdn3 PE=1 SV=2	1	2	6.6	52.028	470	0	33.544	0//0	1//0	0//0	25046000	24	7			-1	1043600	1043600	32527000	1.94658e+07	16.7425	0.026686
sp|Q6P9Q6|FKB15_MOUSE	Fkbp15	sp|Q6P9Q6|FKB15_MOUSE;sp|Q6P9Q6-2|FKB15_MOUSE	sp|Q6P9Q6|FKB15_MOUSE;sp|Q6P9Q6-2|FKB15_MOUSE	FK506-binding protein 15 OS=Mus musculus OX=10090 GN=Fkbp15 PE=1 SV=2;Isoform B of FK506-binding protein 15 OS=Mus musculus OX=10090 GN=Fkbp15	2	6	5.1	132.96	1216	0	48.045	0//0	1//0	0//0	48959000	47	5			-1;-1	1041700	1041700	62708000	3.2381e+07	16.712	0.0266375
sp|Q6P4T2|U520_MOUSE	Snrnp200	sp|Q6P4T2|U520_MOUSE	sp|Q6P4T2|U520_MOUSE	U5 small nuclear ribonucleoprotein 200 kDa helicase OS=Mus musculus OX=10090 GN=Snrnp200 PE=1 SV=1	1	14	9.9	244.54	2136	0	123.09	0//0	1//0	0//0	117360000	113	21			-1	1038600	1038600	149610000	4.27476e+07	16.6623	0.0265582
sp|P63094-2|GNAS2_MOUSE	Gnas	sp|P63094-2|GNAS2_MOUSE;sp|P63094|GNAS2_MOUSE;sp|Q6R0H7-4|GNAS1_MOUSE;sp|Q6R0H7|GNAS1_MOUSE;sp|P63094-3|GNAS2_MOUSE	sp|P63094-2|GNAS2_MOUSE;sp|P63094|GNAS2_MOUSE;sp|Q6R0H7-4|GNAS1_MOUSE;sp|Q6R0H7|GNAS1_MOUSE;sp|P63094-3|GNAS2_MOUSE	Isoform Gnas-2 of Guanine nucleotide-binding protein G(s) subunit alpha isoforms short OS=Mus musculus OX=10090 GN=Gnas;Guanine nucleotide-binding protein G(s) subunit alpha isoforms short OS=Mus musculus OX=10090 GN=Gnas PE=1 SV=1;Isoform XLas-4 of Guanin	5	3	15	44.265	380	0	23.394	0//0	1//0	0//0	19608000	19	5			-1;-1;-1;-1;-1	1032000	1032000	24801000	1.52396e+07	16.5564	0.0263894
sp|Q8CCB4|VPS53_MOUSE	Vps53	sp|Q8CCB4|VPS53_MOUSE;sp|Q8CCB4-2|VPS53_MOUSE	sp|Q8CCB4|VPS53_MOUSE;sp|Q8CCB4-2|VPS53_MOUSE	Vacuolar protein sorting-associated protein 53 homolog OS=Mus musculus OX=10090 GN=Vps53 PE=1 SV=1;Isoform 2 of Vacuolar protein sorting-associated protein 53 homolog OS=Mus musculus OX=10090 GN=Vps53	2	4	8.8	94.422	832	0	60.531	0//0	1//0	0//0	42074000	41	6			-1;-1	1026200	1026200	53690000	2.81889e+07	16.4633	0.0262411
sp|Q6PCM2-2|INT6_MOUSE	Ints6	sp|Q6PCM2-2|INT6_MOUSE;sp|Q6PCM2|INT6_MOUSE;sp|Q6PCM2-3|INT6_MOUSE;sp|Q8BND4|INT6L_MOUSE	sp|Q6PCM2-2|INT6_MOUSE;sp|Q6PCM2|INT6_MOUSE	Isoform 2 of Integrator complex subunit 6 OS=Mus musculus OX=10090 GN=Ints6;Integrator complex subunit 6 OS=Mus musculus OX=10090 GN=Ints6 PE=1 SV=1	4	7	11.4	98.634	874	0	61.779	0//0	1//0	0//0	50234000	49	13			-1;-1;-1;-1	1025200	1025200	65152000	2.31249e+07	16.4473	0.0262155
sp|Q99L88|SNTB1_MOUSE	Sntb1	sp|Q99L88|SNTB1_MOUSE;sp|Q99L88-2|SNTB1_MOUSE	sp|Q99L88|SNTB1_MOUSE;sp|Q99L88-2|SNTB1_MOUSE	Beta-1-syntrophin OS=Mus musculus OX=10090 GN=Sntb1 PE=1 SV=4;Isoform 2 of Beta-1-syntrophin OS=Mus musculus OX=10090 GN=Sntb1	2	2	3.4	58.081	537	0.0021175	10.835	0//0	1//0	0//0	31643000	31	1			-1;-1	1020700	1020700	42226000	2.45933e+07	16.3751	0.0261005
sp|Q9WV85|NDK3_MOUSE	Nme3	sp|Q9WV85|NDK3_MOUSE	sp|Q9WV85|NDK3_MOUSE	Nucleoside diphosphate kinase 3 OS=Mus musculus OX=10090 GN=Nme3 PE=1 SV=3	1	3	19.5	19.099	169	0	20.188	0//0	1//0	0//0	12212000	12	2			-1	1017700	1017700	14874000	9.49177e+06	16.327	0.0260238
sp|P39655|LOX12_MOUSE	Alox12	sp|P39655|LOX12_MOUSE	sp|P39655|LOX12_MOUSE	Polyunsaturated fatty acid lipoxygenase ALOX12 OS=Mus musculus OX=10090 GN=Alox12 PE=1 SV=4	1	4	9	75.389	663	0	39.434	0//0	1//0	0//0	36162000	36	7			-1	1004500	1004500	46867000	2.44779e+07	16.1152	0.0256862
sp|Q09143|SL7A1_MOUSE	Slc7a1	sp|Q09143|SL7A1_MOUSE	sp|Q09143|SL7A1_MOUSE	High affinity cationic amino acid transporter 1 OS=Mus musculus OX=10090 GN=Slc7a1 PE=1 SV=1	1	2	6.4	67.091	622	0	21.103	0//0	1//0	0//0	18996000	19	2			-1	999770	999770	22340000	1.47636e+07	16.0393	0.0255653
sp|Q8BM72|HSP13_MOUSE	Hspa13	sp|Q8BM72|HSP13_MOUSE	sp|Q8BM72|HSP13_MOUSE	Heat shock 70 kDa protein 13 OS=Mus musculus OX=10090 GN=Hspa13 PE=1 SV=1	1	3	6.6	51.709	471	0.00061805	17.926	0//0	1//0	0//0	21846000	22	5			-1	993000	993000	27884000	1.6979e+07	15.9307	0.0253921
sp|Q9QXK7|CPSF3_MOUSE	Cpsf3	sp|Q9QXK7|CPSF3_MOUSE	sp|Q9QXK7|CPSF3_MOUSE	Cleavage and polyadenylation specificity factor subunit 3 OS=Mus musculus OX=10090 GN=Cpsf3 PE=1 SV=2	1	3	7.2	77.504	684	0	19.263	0//0	1//0	0//0	33467000	34	5			-1	984340	984340	40801000	2.60114e+07	15.7918	0.0251707
sp|Q3U4G0|CDIN1_MOUSE	Cdin1	sp|Q3U4G0|CDIN1_MOUSE;sp|Q3U4G0-2|CDIN1_MOUSE	sp|Q3U4G0|CDIN1_MOUSE;sp|Q3U4G0-2|CDIN1_MOUSE	CDAN1-interacting nuclease 1 OS=Mus musculus OX=10090 GN=Cdin1 PE=2 SV=2;Isoform 2 of CDAN1-interacting nuclease 1 OS=Mus musculus OX=10090 GN=Cdin1	2	2	8.9	32.112	281	0.0021288	11.071	0//0	1//0	0//0	12753000	13	3			-1;-1	981030	981030	16625000	9.9121e+06	15.7387	0.0250861
sp|Q01514|GBP1_MOUSE	Gbp1	sp|Q01514|GBP1_MOUSE	sp|Q01514|GBP1_MOUSE	Guanylate-binding protein 1 OS=Mus musculus OX=10090 GN=Gbp1 PE=1 SV=1	1	3	7.5	67.711	589	0	20.669	0//0	1//0	0//0	27455000	28	4			-1	980520	980520	35029000	2.13382e+07	15.7305	0.025073
sp|Q9QYB5-2|ADDG_MOUSE	Add3	sp|Q9QYB5-2|ADDG_MOUSE;sp|Q9QYB5|ADDG_MOUSE	sp|Q9QYB5-2|ADDG_MOUSE;sp|Q9QYB5|ADDG_MOUSE	Isoform 1 of Gamma-adducin OS=Mus musculus OX=10090 GN=Add3;Gamma-adducin OS=Mus musculus OX=10090 GN=Add3 PE=1 SV=2	2	4	8	75.406	674	0	25.169	0//0	1//0	0//0	26446000	27	3			-1;-1	979480	979480	32223000	1.74493e+07	15.7138	0.0250464
sp|Q64471|GSTT1_MOUSE	Gstt1	sp|Q64471|GSTT1_MOUSE	sp|Q64471|GSTT1_MOUSE	Glutathione S-transferase theta-1 OS=Mus musculus OX=10090 GN=Gstt1 PE=1 SV=4	1	2	8.8	27.374	240	0.0011468	13.868	0//0	1//0	0//0	10728000	11	1			-1	975320	975320	13327000	8.33832e+06	15.6471	0.02494
sp|Q9D7N9|APMAP_MOUSE	Apmap	sp|Q9D7N9|APMAP_MOUSE	sp|Q9D7N9|APMAP_MOUSE	Adipocyte plasma membrane-associated protein OS=Mus musculus OX=10090 GN=Apmap PE=1 SV=1	1	4	14.9	46.434	415	0	42.894	0//0	1//0	0//0	20107000	21	4			-1	957490	957490	27607000	1.56276e+07	15.361	0.0244841
sp|Q8R1V4|TMED4_MOUSE	Tmed4	sp|Q8R1V4|TMED4_MOUSE	sp|Q8R1V4|TMED4_MOUSE	Transmembrane emp24 domain-containing protein 4 OS=Mus musculus OX=10090 GN=Tmed4 PE=1 SV=1	1	2	21.1	26.022	227	0.0011567	14.301	0//0	1//0	0//0	12417000	13	4			-1	955190	955190	16060000	9.65111e+06	15.3241	0.0244253
sp|Q8R0G9|NU133_MOUSE	Nup133	sp|Q8R0G9|NU133_MOUSE	sp|Q8R0G9|NU133_MOUSE	Nuclear pore complex protein Nup133 OS=Mus musculus OX=10090 GN=Nup133 PE=1 SV=2	1	4	6.3	128.62	1155	0	35.742	0//0	1//0	0//0	59025000	62	5			-1	952020	952020	74949000	4.46428e+07	15.2733	0.0243442
sp|Q8VEK0|CC50A_MOUSE	Tmem30a	sp|Q8VEK0|CC50A_MOUSE;sp|Q8BHG3|CC50B_MOUSE	sp|Q8VEK0|CC50A_MOUSE;sp|Q8BHG3|CC50B_MOUSE	Cell cycle control protein 50A OS=Mus musculus OX=10090 GN=Tmem30a PE=1 SV=1;Cell cycle control protein 50B OS=Mus musculus OX=10090 GN=Tmem30b PE=2 SV=1	2	2	4.4	41.06	364	0.0021657	11.776	0//0	1//0	0//0	14269000	15	4			-1;-1	951290	951290	18502000	1.10903e+07	15.2616	0.0243256
sp|P97390|VPS45_MOUSE	Vps45	sp|P97390|VPS45_MOUSE	sp|P97390|VPS45_MOUSE	Vacuolar protein sorting-associated protein 45 OS=Mus musculus OX=10090 GN=Vps45 PE=1 SV=1	1	4	7.9	65.052	570	0	27.091	0//0	1//0	1//0	30374000	32	6			-1	949180	949180	38319000	2.36068e+07	15.2277	0.0242716
sp|Q99L47|F10A1_MOUSE	St13	sp|Q99L47|F10A1_MOUSE	sp|Q99L47|F10A1_MOUSE	Hsc70-interacting protein OS=Mus musculus OX=10090 GN=St13 PE=1 SV=1	1	2	6.5	41.655	371	0.002113	10.818	0//0	1//0	0//0	11355000	12	1			-1	946240	946240	14343000	8.82501e+06	15.1805	0.0241964
sp|Q9JI39|ABCBA_MOUSE	Abcb10	sp|Q9JI39|ABCBA_MOUSE	sp|Q9JI39|ABCBA_MOUSE	ATP-binding cassette sub-family B member 10, mitochondrial OS=Mus musculus OX=10090 GN=Abcb10 PE=1 SV=1	1	3	4.1	77.187	715	0	20.878	0//0	1//0	0//0	36700000	39	7			-1	941030	941030	48028000	2.85239e+07	15.097	0.0240632
sp|Q3TDN2-2|FAF2_MOUSE	Faf2	sp|Q3TDN2-2|FAF2_MOUSE;sp|Q3TDN2|FAF2_MOUSE	sp|Q3TDN2-2|FAF2_MOUSE;sp|Q3TDN2|FAF2_MOUSE	Isoform 2 of FAS-associated factor 2 OS=Mus musculus OX=10090 GN=Faf2;FAS-associated factor 2 OS=Mus musculus OX=10090 GN=Faf2 PE=1 SV=2	2	4	14.3	50.23	426	0	26.161	0//0	1//0	0//0	17839000	19	3			-1;-1	938920	938920	23177000	1.10647e+07	15.0631	0.0240093
sp|Q8R2U0-2|SEH1_MOUSE	Seh1l	sp|Q8R2U0-2|SEH1_MOUSE;sp|Q8R2U0|SEH1_MOUSE	sp|Q8R2U0-2|SEH1_MOUSE;sp|Q8R2U0|SEH1_MOUSE	Isoform 2 of Nucleoporin SEH1 OS=Mus musculus OX=10090 GN=Seh1l;Nucleoporin SEH1 OS=Mus musculus OX=10090 GN=Seh1l PE=2 SV=1	2	3	12.3	39.422	357	0	22.995	0//0	1//0	1//0	20365000	22	5			-1;-1	925690	925690	25772000	1.58281e+07	14.8509	0.023671
sp|Q8BTX9|HSDL1_MOUSE	Hsdl1	sp|Q8BTX9|HSDL1_MOUSE	sp|Q8BTX9|HSDL1_MOUSE	Inactive hydroxysteroid dehydrogenase-like protein 1 OS=Mus musculus OX=10090 GN=Hsdl1 PE=1 SV=1	1	2	11.5	36.867	330	0.00060168	16.329	0//0	1//0	0//0	14760000	16	5			-1	922480	922480	19024000	1.14713e+07	14.7994	0.0235889
sp|Q8K1I7|WIPF1_MOUSE	Wipf1	sp|Q8K1I7|WIPF1_MOUSE	sp|Q8K1I7|WIPF1_MOUSE	WAS/WASL-interacting protein family member 1 OS=Mus musculus OX=10090 GN=Wipf1 PE=1 SV=1	1	2	7.7	50.08	493	0.0021402	11.3	1//0	1//0	0//0	18356000	20	2			-1	917780	917780	24421000	1.42661e+07	14.724	0.0234687
sp|P28658|ATX10_MOUSE	Atxn10	sp|P28658|ATX10_MOUSE	sp|P28658|ATX10_MOUSE	Ataxin-10 OS=Mus musculus OX=10090 GN=Atxn10 PE=1 SV=2	1	3	8.2	53.706	475	0	45.622	0//0	1//0	0//0	25644000	28	6			-1	915850	915850	33019000	1.99306e+07	14.693	0.0234193
sp|P48410|ABCD1_MOUSE	Abcd1	sp|P48410|ABCD1_MOUSE	sp|P48410|ABCD1_MOUSE	ATP-binding cassette sub-family D member 1 OS=Mus musculus OX=10090 GN=Abcd1 PE=1 SV=1	1	6	13.2	81.858	736	0	42.375	0//0	1//0	0//0	31001000	34	6			-1	911790	911790	38610000	1.94139e+07	14.6279	0.0233155
sp|Q8C7X2|EMC1_MOUSE	Emc1	sp|Q8C7X2|EMC1_MOUSE;sp|Q8C7X2-2|EMC1_MOUSE;sp|Q8C7X2-3|EMC1_MOUSE	sp|Q8C7X2|EMC1_MOUSE;sp|Q8C7X2-2|EMC1_MOUSE;sp|Q8C7X2-3|EMC1_MOUSE	ER membrane protein complex subunit 1 OS=Mus musculus OX=10090 GN=Emc1 PE=1 SV=1;Isoform 2 of ER membrane protein complex subunit 1 OS=Mus musculus OX=10090 GN=Emc1;Isoform 3 of ER membrane protein complex subunit 1 OS=Mus musculus OX=10090 GN=Emc1	3	5	8.8	111.6	997	0	40.609	0//0	1//0	0//0	39002000	43	7			-1;-1;-1	907030	907030	49217000	2.66719e+07	14.5515	0.0231938
sp|Q3TZZ7|ESYT2_MOUSE	Esyt2	sp|Q3TZZ7|ESYT2_MOUSE;sp|Q3TZZ7-2|ESYT2_MOUSE	sp|Q3TZZ7|ESYT2_MOUSE;sp|Q3TZZ7-2|ESYT2_MOUSE	Extended synaptotagmin-2 OS=Mus musculus OX=10090 GN=Esyt2 PE=1 SV=1;Isoform 2 of Extended synaptotagmin-2 OS=Mus musculus OX=10090 GN=Esyt2	2	4	7	94.138	845	0	29.435	0//0	1//0	0//0	35238000	39	3			-1;-1	903550	903550	46465000	2.57282e+07	14.4957	0.0231048
sp|Q9EQQ9|OGA_MOUSE	Oga	sp|Q9EQQ9|OGA_MOUSE;sp|Q9EQQ9-3|OGA_MOUSE	sp|Q9EQQ9|OGA_MOUSE;sp|Q9EQQ9-3|OGA_MOUSE	Protein O-GlcNAcase OS=Mus musculus OX=10090 GN=Oga PE=1 SV=2;Isoform 3 of Protein O-GlcNAcase OS=Mus musculus OX=10090 GN=Oga	2	4	6.8	103.16	916	0	31.479	0//0	1//0	0//0	41394000	46	8			-1;-1	899860	899860	52966000	3.0683e+07	14.4365	0.0230105
sp|P39087-2|GRIK2_MOUSE	Grik2	sp|P39087-2|GRIK2_MOUSE;sp|P39087|GRIK2_MOUSE	sp|P39087-2|GRIK2_MOUSE;sp|P39087|GRIK2_MOUSE	Isoform GluR6-2 of Glutamate receptor ionotropic, kainate 2 OS=Mus musculus OX=10090 GN=Grik2;Glutamate receptor ionotropic, kainate 2 OS=Mus musculus OX=10090 GN=Grik2 PE=1 SV=4	2	2	3	97.882	869	0.0031315	10.221	0//0	1//0	0//0	34069000	38	3			-1;-1	896560	896560	41142000	2.6479e+07	14.3835	0.0229261
sp|Q9CWX2|CIA30_MOUSE	Ndufaf1	sp|Q9CWX2|CIA30_MOUSE	sp|Q9CWX2|CIA30_MOUSE	Complex I intermediate-associated protein 30, mitochondrial OS=Mus musculus OX=10090 GN=Ndufaf1 PE=1 SV=2	1	2	10.7	37.809	328	0.0011429	13.751	0//0	1//0	0//0	16817000	19	2			-1	885090	885090	20972000	1.30701e+07	14.1995	0.0226328
sp|Q8R3V5|SHLB2_MOUSE	Sh3glb2	sp|Q8R3V5|SHLB2_MOUSE;sp|Q8R3V5-1|SHLB2_MOUSE;sp|Q8R3V5-3|SHLB2_MOUSE	sp|Q8R3V5|SHLB2_MOUSE;sp|Q8R3V5-1|SHLB2_MOUSE;sp|Q8R3V5-3|SHLB2_MOUSE	Endophilin-B2 OS=Mus musculus OX=10090 GN=Sh3glb2 PE=1 SV=2;Isoform 1 of Endophilin-B2 OS=Mus musculus OX=10090 GN=Sh3glb2;Isoform 3 of Endophilin-B2 OS=Mus musculus OX=10090 GN=Sh3glb2	3	2	9.2	44.503	400	0	18.568	0//0	1//0	0//0	14762000	17	1			-1;-1;-1	868360	868360	18374000	1.14732e+07	13.9311	0.022205
sp|Q9CXU0|MED10_MOUSE	Med10	sp|Q9CXU0|MED10_MOUSE	sp|Q9CXU0|MED10_MOUSE	Mediator of RNA polymerase II transcription subunit 10 OS=Mus musculus OX=10090 GN=Med10 PE=1 SV=1	1	2	29.6	15.661	135	0.0021587	11.685	0//0	1//0	0//0	6904900	8	2			-1	863110	863110	8993000	5.36657e+06	13.8469	0.0220707
sp|Q8VCL2|SCO2_MOUSE	Sco2	sp|Q8VCL2|SCO2_MOUSE	sp|Q8VCL2|SCO2_MOUSE	Protein SCO2 homolog, mitochondrial OS=Mus musculus OX=10090 GN=Sco2 PE=1 SV=1	1	2	16.1	28.944	255	0.00061387	17.713	0//0	1//0	0//0	12838000	15	2			-1	855890	855890	14264000	9.97809e+06	13.7311	0.0218861
sp|Q64727|VINC_MOUSE	Vcl	sp|Q64727|VINC_MOUSE	sp|Q64727|VINC_MOUSE	Vinculin OS=Mus musculus OX=10090 GN=Vcl PE=1 SV=4	1	7	10.2	116.72	1066	0	51.512	0//0	1//0	0//0	63041000	74	9			-1	851910	851910	78264000	3.23364e+07	13.6672	0.0217843
sp|P17918|PCNA_MOUSE	Pcna	sp|P17918|PCNA_MOUSE	sp|P17918|PCNA_MOUSE	Proliferating cell nuclear antigen OS=Mus musculus OX=10090 GN=Pcna PE=1 SV=2	1	3	13.4	28.785	261	0.00061501	17.749	0//0	1//0	0//0	13505000	16	5			-1	844060	844060	17883000	1.04962e+07	13.5413	0.0215836
sp|Q8CI04|COG3_MOUSE	Cog3	sp|Q8CI04|COG3_MOUSE	sp|Q8CI04|COG3_MOUSE	Conserved oligomeric Golgi complex subunit 3 OS=Mus musculus OX=10090 GN=Cog3 PE=1 SV=3	1	4	7.3	93.282	820	0	35.7	0//0	1//0	0//0	39267000	47	7			-1	835480	835480	48722000	2.90084e+07	13.4036	0.0213642
sp|Q61549|AGRE1_MOUSE	Adgre1	sp|Q61549|AGRE1_MOUSE	sp|Q61549|AGRE1_MOUSE	Adhesion G protein-coupled receptor E1 OS=Mus musculus OX=10090 GN=Adgre1 PE=1 SV=1	1	2	4.9	102.13	931	0.001182	15.277	0//0	1//0	0//0	18369000	22	4			-1	834950	834950	22527000	1.42765e+07	13.3951	0.0213506
sp|Q9ERI2|RB27A_MOUSE	Rab27a	sp|Q9ERI2|RB27A_MOUSE	sp|Q9ERI2|RB27A_MOUSE	Ras-related protein Rab-27A OS=Mus musculus OX=10090 GN=Rab27a PE=1 SV=1	1	2	13.6	25.017	221	0.0021186	10.857	0//0	1//0	0//0	10842000	13	2			-1	834030	834030	13708000	8.42685e+06	13.3804	0.0213271
sp|Q9QZH6|ECSIT_MOUSE	Ecsit	sp|Q9QZH6|ECSIT_MOUSE	sp|Q9QZH6|ECSIT_MOUSE	Evolutionarily conserved signaling intermediate in Toll pathway, mitochondrial OS=Mus musculus OX=10090 GN=Ecsit PE=1 SV=2	1	3	11.3	49.798	435	0	18.548	0//0	1//0	0//0	20748000	25	6			-1	829910	829910	25933000	1.61254e+07	13.3143	0.0212217
sp|Q7TNC4-2|LC7L2_MOUSE	Luc7l2	sp|Q7TNC4-2|LC7L2_MOUSE;sp|Q7TNC4-3|LC7L2_MOUSE;sp|Q7TNC4-4|LC7L2_MOUSE;sp|Q7TNC4|LC7L2_MOUSE;sp|Q9CYI4-2|LUC7L_MOUSE;sp|Q9CYI4|LUC7L_MOUSE	sp|Q7TNC4-2|LC7L2_MOUSE;sp|Q7TNC4-3|LC7L2_MOUSE;sp|Q7TNC4-4|LC7L2_MOUSE;sp|Q7TNC4|LC7L2_MOUSE;sp|Q9CYI4-2|LUC7L_MOUSE;sp|Q9CYI4|LUC7L_MOUSE	Isoform 2 of Putative RNA-binding protein Luc7-like 2 OS=Mus musculus OX=10090 GN=Luc7l2;Isoform 3 of Putative RNA-binding protein Luc7-like 2 OS=Mus musculus OX=10090 GN=Luc7l2;Isoform 4 of Putative RNA-binding protein Luc7-like 2 OS=Mus musculus OX=10090	6	2	8.3	38.611	325	0.0021739	11.882	0//0	1//0	0//0	12920000	16	3			-1;-1;-1;-1;-1;-1	807500	807500	17240000	1.00415e+07	12.9547	0.0206487
sp|Q62376-2|RU17_MOUSE	Snrnp70	sp|Q62376-2|RU17_MOUSE;sp|Q62376|RU17_MOUSE	sp|Q62376-2|RU17_MOUSE;sp|Q62376|RU17_MOUSE	Isoform 2 of U1 small nuclear ribonucleoprotein 70 kDa OS=Mus musculus OX=10090 GN=Snrnp70;U1 small nuclear ribonucleoprotein 70 kDa OS=Mus musculus OX=10090 GN=Snrnp70 PE=1 SV=2	2	2	15.1	19.79	166	0.0021505	11.568	0//0	1//0	0//0	8866100	11	0			-1;-1	806010	806010	12141000	6.89084e+06	12.9308	0.0206106
sp|Q8C163|EXOG_MOUSE	Exog	sp|Q8C163|EXOG_MOUSE	sp|Q8C163|EXOG_MOUSE	Nuclease EXOG, mitochondrial OS=Mus musculus OX=10090 GN=Exog PE=1 SV=1	1	2	7.9	41.383	368	0.0021425	11.333	0//0	1//0	0//0	13572000	17	0			-1	798340	798340	18682000	1.05481e+07	12.8078	0.0204145
sp|Q8BTZ4-2|APC5_MOUSE	Anapc5	sp|Q8BTZ4-2|APC5_MOUSE;sp|Q8BTZ4|APC5_MOUSE	sp|Q8BTZ4-2|APC5_MOUSE;sp|Q8BTZ4|APC5_MOUSE	Isoform 2 of Anaphase-promoting complex subunit 5 OS=Mus musculus OX=10090 GN=Anapc5;Anaphase-promoting complex subunit 5 OS=Mus musculus OX=10090 GN=Anapc5 PE=1 SV=1	2	5	7.8	81.695	727	0	30.898	0//0	1//0	0//0	33857000	43	4			-1;-1	787370	787370	45588000	2.26791e+07	12.6318	0.020134
sp|P52825|CPT2_MOUSE	Cpt2	sp|P52825|CPT2_MOUSE	sp|P52825|CPT2_MOUSE	Carnitine O-palmitoyltransferase 2, mitochondrial OS=Mus musculus OX=10090 GN=Cpt2 PE=1 SV=2	1	5	10	73.98	658	0	31.237	0//0	1//0	0//0	25922000	33	4			-1	785520	785520	33218000	1.968e+07	12.6021	0.0200866
sp|Q921V5|MGAT2_MOUSE	Mgat2	sp|Q921V5|MGAT2_MOUSE	sp|Q921V5|MGAT2_MOUSE	Alpha-1,6-mannosyl-glycoprotein 2-beta-N-acetylglucosaminyltransferase OS=Mus musculus OX=10090 GN=Mgat2 PE=1 SV=1	1	4	12.2	51.029	442	0	27.871	0//0	1//0	0//0	17280000	22	6			-1	785450	785450	22178000	1.34301e+07	12.601	0.0200849
sp|Q9EQC5|SCYL1_MOUSE	Scyl1	sp|Q9EQC5|SCYL1_MOUSE	sp|Q9EQC5|SCYL1_MOUSE	N-terminal kinase-like protein OS=Mus musculus OX=10090 GN=Scyl1 PE=1 SV=1	1	4	7.2	89.159	806	0	34.177	0//0	1//0	0//0	27222000	35	7			-1	777780	777780	37005000	1.89136e+07	12.4779	0.0198887
sp|P70224|GIMA1_MOUSE	Gimap1	sp|P70224|GIMA1_MOUSE	sp|P70224|GIMA1_MOUSE	GTPase IMAP family member 1 OS=Mus musculus OX=10090 GN=Gimap1 PE=1 SV=3	1	2	9.4	30.828	277	0.0011723	14.881	0//0	1//0	0//0	13967000	18	4			-1	775920	775920	17459000	1.08549e+07	12.4481	0.0198412
sp|O08914|FAAH1_MOUSE	Faah	sp|O08914|FAAH1_MOUSE	sp|O08914|FAAH1_MOUSE	Fatty-acid amide hydrolase 1 OS=Mus musculus OX=10090 GN=Faah PE=1 SV=1	1	3	6.6	63.221	579	0	21.178	0//0	1//0	0//0	16264000	21	4			-1	774480	774480	19983000	1.26407e+07	12.425	0.0198043
sp|P40336|VP26A_MOUSE	Vps26a	sp|P40336|VP26A_MOUSE;sp|P40336-2|VP26A_MOUSE	sp|P40336|VP26A_MOUSE;sp|P40336-2|VP26A_MOUSE	Vacuolar protein sorting-associated protein 26A OS=Mus musculus OX=10090 GN=Vps26a PE=1 SV=1;Isoform 2 of Vacuolar protein sorting-associated protein 26A OS=Mus musculus OX=10090 GN=Vps26a	2	4	17.1	38.113	327	0	25.255	0//0	1//0	0//0	13905000	18	3			-1;-1	772510	772510	16597000	1.08074e+07	12.3934	0.019754
sp|Q8BUK6|HOOK3_MOUSE	Hook3	sp|Q8BUK6|HOOK3_MOUSE	sp|Q8BUK6|HOOK3_MOUSE	Protein Hook homolog 3 OS=Mus musculus OX=10090 GN=Hook3 PE=1 SV=2	1	4	7.4	83.217	718	0	86.227	0//0	1//0	0//0	26877000	35	7			-1	767910	767910	32147000	1.91551e+07	12.3196	0.0196363
sp|O35114|SCRB2_MOUSE	Scarb2	sp|O35114|SCRB2_MOUSE	sp|O35114|SCRB2_MOUSE	Lysosome membrane protein 2 OS=Mus musculus OX=10090 GN=Scarb2 PE=1 SV=3	1	2	10.5	54.043	478	0	22.162	0//0	1//0	0//0	16059000	21	2			-1	764730	764730	22455000	1.24816e+07	12.2686	0.019555
sp|Q9QZN4|FBX6_MOUSE	Fbxo6	sp|Q9QZN4|FBX6_MOUSE	sp|Q9QZN4|FBX6_MOUSE	F-box only protein 6 OS=Mus musculus OX=10090 GN=Fbxo6 PE=1 SV=1	1	2	12.2	34.492	295	0.0011403	13.635	0//0	1//0	0//0	12909000	17	1			-1	759370	759370	16972000	1.00333e+07	12.1826	0.019418
sp|Q9Z2Z6|MCAT_MOUSE	Slc25a20	sp|Q9Z2Z6|MCAT_MOUSE	sp|Q9Z2Z6|MCAT_MOUSE	Mitochondrial carnitine/acylcarnitine carrier protein OS=Mus musculus OX=10090 GN=Slc25a20 PE=1 SV=1	1	2	10.6	33.026	301	0.0026205	10.417	0//0	1//0	0//0	13664000	18	2			-1	759110	759110	16712000	1.06198e+07	12.1784	0.0194113
sp|P84091|AP2M1_MOUSE	Ap2m1	sp|P84091|AP2M1_MOUSE	sp|P84091|AP2M1_MOUSE	AP-2 complex subunit mu OS=Mus musculus OX=10090 GN=Ap2m1 PE=1 SV=1	1	2	6.9	49.654	435	0.0011834	15.301	0//0	1//0	0//0	19730000	26	4			-1	758850	758850	25005000	1.53344e+07	12.1742	0.0194047
sp|Q8R349|CDC16_MOUSE	Cdc16	sp|Q8R349|CDC16_MOUSE	sp|Q8R349|CDC16_MOUSE	Cell division cycle protein 16 homolog OS=Mus musculus OX=10090 GN=Cdc16 PE=1 SV=1	1	4	9.7	71.459	620	0	30.734	0//0	1//0	0//0	20174000	27	6			-1	747180	747180	25984000	1.56794e+07	11.987	0.0191062
sp|Q6P9N1-2|HYCCI_MOUSE	Fam126a	sp|Q6P9N1-2|HYCCI_MOUSE;sp|Q6P9N1-3|HYCCI_MOUSE;sp|Q6P9N1|HYCCI_MOUSE	sp|Q6P9N1-2|HYCCI_MOUSE;sp|Q6P9N1-3|HYCCI_MOUSE;sp|Q6P9N1|HYCCI_MOUSE	Isoform 2 of Hyccin OS=Mus musculus OX=10090 GN=Fam126a;Isoform 3 of Hyccin OS=Mus musculus OX=10090 GN=Fam126a;Hyccin OS=Mus musculus OX=10090 GN=Fam126a PE=1 SV=3	3	2	7.3	41.686	370	0.0011976	15.943	0//0	1//0	0//0	13379000	18	2			-1;-1;-1	743260	743260	17397000	1.03981e+07	11.9241	0.019006
sp|Q60766-2|IRGM1_MOUSE	Irgm1	sp|Q60766-2|IRGM1_MOUSE;sp|Q60766|IRGM1_MOUSE	sp|Q60766-2|IRGM1_MOUSE;sp|Q60766|IRGM1_MOUSE	Isoform 2 of Immunity-related GTPase family M protein 1 OS=Mus musculus OX=10090 GN=Irgm1;Immunity-related GTPase family M protein 1 OS=Mus musculus OX=10090 GN=Irgm1 PE=1 SV=1	2	4	13.7	44.887	393	0	30.609	0//0	1//0	0//0	13333000	18	6			-1;-1	740740	740740	17727000	1.03628e+07	11.8837	0.0189416
sp|Q9DBX3|SUSD2_MOUSE	Susd2	sp|Q9DBX3|SUSD2_MOUSE;sp|Q9DBX3-2|SUSD2_MOUSE	sp|Q9DBX3|SUSD2_MOUSE;sp|Q9DBX3-2|SUSD2_MOUSE	Sushi domain-containing protein 2 OS=Mus musculus OX=10090 GN=Susd2 PE=1 SV=1;Isoform 2 of Sushi domain-containing protein 2 OS=Mus musculus OX=10090 GN=Susd2	2	2	4.1	90.641	820	0.0021198	10.859	0//0	1//0	0//0	22054000	30	2			-1;-1	735140	735140	28214000	1.71408e+07	11.7939	0.0187984
sp|Q8VBZ0|DHRSX_MOUSE	Dhrsx	sp|Q8VBZ0|DHRSX_MOUSE	sp|Q8VBZ0|DHRSX_MOUSE	Dehydrogenase/reductase SDR family member on chromosome X homolog OS=Mus musculus OX=10090 GN=Dhrsx PE=1 SV=2	1	3	15.2	35.957	335	0	19.006	0//0	1//0	0//0	15420000	21	3			-1	734270	734270	20804000	1.19843e+07	11.7799	0.0187761
sp|Q8CG50|RAB43_MOUSE	Rab43	sp|Q8CG50|RAB43_MOUSE	sp|Q8CG50|RAB43_MOUSE	Ras-related protein Rab-43 OS=Mus musculus OX=10090 GN=Rab43 PE=1 SV=1	1	2	17.1	23.263	210	0.00060024	16.168	0//0	1//0	0//0	12357000	17	3			-1	726900	726900	14666000	9.60425e+06	11.6617	0.0185877
sp|P27046|MA2A1_MOUSE	Man2a1	sp|P27046|MA2A1_MOUSE;sp|Q8BRK9-2|MA2A2_MOUSE;sp|Q8BRK9|MA2A2_MOUSE	sp|P27046|MA2A1_MOUSE	Alpha-mannosidase 2 OS=Mus musculus OX=10090 GN=Man2a1 PE=1 SV=2	3	6	6	131.63	1150	0	38.266	0//0	1//0	0//0	40353000	56	6			-1;-1;-1	720600	720600	55123000	2.44097e+07	11.5606	0.0184266
sp|Q9R1P3|PSB2_MOUSE	Psmb2	sp|Q9R1P3|PSB2_MOUSE	sp|Q9R1P3|PSB2_MOUSE	Proteasome subunit beta type-2 OS=Mus musculus OX=10090 GN=Psmb2 PE=1 SV=1	1	2	12.9	22.906	201	0.0021858	12.119	0//0	1//0	0//0	7058100	10	1			-1	705810	705810	8939200	5.48572e+06	11.3233	0.0180484
sp|Q9Z1R4|CF047_MOUSE	D17h6s53e	sp|Q9Z1R4|CF047_MOUSE	sp|Q9Z1R4|CF047_MOUSE	Uncharacterized protein C6orf47 homolog OS=Mus musculus OX=10090 GN=D17h6s53e PE=1 SV=1	1	2	8.9	32.014	293	0.0031414	10.351	0//0	1//0	0//0	8357800	12	3			-1	696480	696480	11175000	6.49571e+06	11.1736	0.0178098
sp|Q9QUG9|GRP2_MOUSE	Rasgrp2	sp|Q9QUG9|GRP2_MOUSE;sp|Q9QUG9-2|GRP2_MOUSE;sp|Q9QUG9-3|GRP2_MOUSE	sp|Q9QUG9|GRP2_MOUSE;sp|Q9QUG9-2|GRP2_MOUSE	RAS guanyl-releasing protein 2 OS=Mus musculus OX=10090 GN=Rasgrp2 PE=1 SV=2;Isoform 2 of RAS guanyl-releasing protein 2 OS=Mus musculus OX=10090 GN=Rasgrp2	3	4	12.3	69.445	608	0	23.231	0//0	1//0	0//0	22843000	33	3			-1;-1;-1	692210	692210	28935000	1.72024e+07	11.1051	0.0177006
sp|Q8K2A7|INT10_MOUSE	Ints10	sp|Q8K2A7|INT10_MOUSE	sp|Q8K2A7|INT10_MOUSE	Integrator complex subunit 10 OS=Mus musculus OX=10090 GN=Ints10 PE=1 SV=3	1	6	9.2	82.019	710	0	34.927	0//0	1//0	0//0	25467000	37	7			-1	688310	688310	32761000	1.61087e+07	11.0426	0.0176009
sp|O54916-3|REPS1_MOUSE	Reps1	sp|O54916-3|REPS1_MOUSE;sp|O54916-4|REPS1_MOUSE;sp|O54916|REPS1_MOUSE;sp|O54916-2|REPS1_MOUSE;sp|Q80XA6|REPS2_MOUSE	sp|O54916-3|REPS1_MOUSE;sp|O54916-4|REPS1_MOUSE;sp|O54916|REPS1_MOUSE	Isoform 3 of RalBP1-associated Eps domain-containing protein 1 OS=Mus musculus OX=10090 GN=Reps1;Isoform 4 of RalBP1-associated Eps domain-containing protein 1 OS=Mus musculus OX=10090 GN=Reps1;RalBP1-associated Eps domain-containing protein 1 OS=Mus muscu	5	4	6.8	77.613	716	0	27.099	0//0	1//0	0//0	21099000	31	3			-1;-1;-1;-1;-1	680610	680610	28537000	1.63983e+07	10.919	0.017404
sp|Q8BUV8|GP107_MOUSE	Gpr107	sp|Q8BUV8|GP107_MOUSE	sp|Q8BUV8|GP107_MOUSE	Protein GPR107 OS=Mus musculus OX=10090 GN=Gpr107 PE=1 SV=2	1	2	4	62.055	551	0.0021966	12.274	0//0	1//0	0//0	17691000	26	2			-1	680420	680420	25669000	1.37496e+07	10.916	0.0173991
sp|Q91YR7-2|PRP6_MOUSE	Prpf6	sp|Q91YR7-2|PRP6_MOUSE;sp|Q91YR7|PRP6_MOUSE	sp|Q91YR7-2|PRP6_MOUSE;sp|Q91YR7|PRP6_MOUSE	Isoform 2 of Pre-mRNA-processing factor 6 OS=Mus musculus OX=10090 GN=Prpf6;Pre-mRNA-processing factor 6 OS=Mus musculus OX=10090 GN=Prpf6 PE=1 SV=1	2	3	6.1	63.96	570	0.00061958	18.082	0//0	1//0	0//0	23060000	34	3			-1;-1	678220	678220	29048000	1.79221e+07	10.8807	0.0173429
sp|Q91WG4-2|ELP2_MOUSE	Elp2	sp|Q91WG4-2|ELP2_MOUSE;sp|Q91WG4|ELP2_MOUSE	sp|Q91WG4-2|ELP2_MOUSE;sp|Q91WG4|ELP2_MOUSE	Isoform 2 of Elongator complex protein 2 OS=Mus musculus OX=10090 GN=Elp2;Elongator complex protein 2 OS=Mus musculus OX=10090 GN=Elp2 PE=1 SV=1	2	2	3.9	82.71	741	0.00060533	16.922	0//0	1//0	0//0	20803000	31	4			-1;-1	671060	671060	26356000	1.61682e+07	10.7658	0.0171598
sp|Q9CWS4|INT11_MOUSE	Ints11	sp|Q9CWS4|INT11_MOUSE	sp|Q9CWS4|INT11_MOUSE	Integrator complex subunit 11 OS=Mus musculus OX=10090 GN=Ints11 PE=1 SV=1	1	2	3.5	67.843	600	0.0021119	10.743	0//0	1//0	0//0	18752000	28	2			-1	669730	669730	24096000	1.45748e+07	10.7445	0.0171258
sp|Q6PHU5|SORT_MOUSE	Sort1	sp|Q6PHU5|SORT_MOUSE;sp|Q6PHU5-2|SORT_MOUSE	sp|Q6PHU5|SORT_MOUSE;sp|Q6PHU5-2|SORT_MOUSE	Sortilin OS=Mus musculus OX=10090 GN=Sort1 PE=1 SV=1;Isoform 2 of Sortilin OS=Mus musculus OX=10090 GN=Sort1	2	3	5.5	91.199	825	0	18.681	0//0	1//0	0//0	19105000	29	4			-1;-1	658800	658800	27147000	1.48489e+07	10.5691	0.0168463
sp|P09055|ITB1_MOUSE	Itgb1	sp|P09055|ITB1_MOUSE;sp|P09055-2|ITB1_MOUSE	sp|P09055|ITB1_MOUSE;sp|P09055-2|ITB1_MOUSE	Integrin beta-1 OS=Mus musculus OX=10090 GN=Itgb1 PE=1 SV=1;Isoform 2 of Integrin beta-1 OS=Mus musculus OX=10090 GN=Itgb1	2	2	4.9	88.231	798	0	39.274	0//0	1//0	0//0	21603000	34	4			-1;-1	635400	635400	28048000	1.67904e+07	10.1937	0.0162479
sp|Q91WN4-2|KMO_MOUSE	Kmo	sp|Q91WN4-2|KMO_MOUSE;sp|Q91WN4|KMO_MOUSE	sp|Q91WN4-2|KMO_MOUSE;sp|Q91WN4|KMO_MOUSE	Isoform 2 of Kynurenine 3-monooxygenase OS=Mus musculus OX=10090 GN=Kmo;Kynurenine 3-monooxygenase OS=Mus musculus OX=10090 GN=Kmo PE=1 SV=1	2	3	9.9	50.395	445	0	79.092	0//0	1//0	0//0	15814000	25	3			-1;-1	632580	632580	20397000	1.22913e+07	10.1485	0.0161758
sp|Q9QWR8|NAGAB_MOUSE	Naga	sp|Q9QWR8|NAGAB_MOUSE	sp|Q9QWR8|NAGAB_MOUSE	Alpha-N-acetylgalactosaminidase OS=Mus musculus OX=10090 GN=Naga PE=1 SV=2	1	2	5.1	47.234	415	0.0011696	14.641	0//0	1//0	0//0	13836000	22	3			-1	628900	628900	16768000	1.07534e+07	10.0895	0.0160817
sp|Q8K1M6-3|DNM1L_MOUSE	Dnm1l	sp|Q8K1M6-3|DNM1L_MOUSE;sp|Q8K1M6-2|DNM1L_MOUSE;sp|Q8K1M6|DNM1L_MOUSE;sp|Q8K1M6-4|DNM1L_MOUSE;sp|Q8K1M6-5|DNM1L_MOUSE	sp|Q8K1M6-3|DNM1L_MOUSE;sp|Q8K1M6-2|DNM1L_MOUSE;sp|Q8K1M6|DNM1L_MOUSE;sp|Q8K1M6-4|DNM1L_MOUSE	Isoform 3 of Dynamin-1-like protein OS=Mus musculus OX=10090 GN=Dnm1l;Isoform 2 of Dynamin-1-like protein OS=Mus musculus OX=10090 GN=Dnm1l;Dynamin-1-like protein OS=Mus musculus OX=10090 GN=Dnm1l PE=1 SV=2;Isoform 4 of Dynamin-1-like protein OS=Mus muscul	5	5	10.3	78.01	699	0	31.174	0//0	1//0	0//0	30717000	49	4			-1;-1;-1;-1;-1	626870	626870	39548000	1.88339e+07	10.0569	0.0160298
sp|Q9D071-2|MMS19_MOUSE	Mms19	sp|Q9D071-2|MMS19_MOUSE;sp|Q9D071-3|MMS19_MOUSE;sp|Q9D071|MMS19_MOUSE	sp|Q9D071-2|MMS19_MOUSE;sp|Q9D071-3|MMS19_MOUSE;sp|Q9D071|MMS19_MOUSE	Isoform 2 of MMS19 nucleotide excision repair protein homolog OS=Mus musculus OX=10090 GN=Mms19;Isoform 3 of MMS19 nucleotide excision repair protein homolog OS=Mus musculus OX=10090 GN=Mms19;MMS19 nucleotide excision repair protein homolog OS=Mus musculus	3	2	3.8	97.458	889	0	28.393	0//0	1//0	0//0	28725000	46	4			-1;-1;-1	624450	624450	37790000	2.23251e+07	10.0181	0.0159679
sp|Q91VE0|S27A4_MOUSE	Slc27a4	sp|Q91VE0|S27A4_MOUSE	sp|Q91VE0|S27A4_MOUSE	Long-chain fatty acid transport protein 4 OS=Mus musculus OX=10090 GN=Slc27a4 PE=1 SV=1	1	4	7.5	72.318	643	0	23.688	0//0	1//0	0//0	22671000	37	4			-1	612740	612740	29921000	1.41767e+07	9.8302	0.0156685
sp|P14576|SRP54_MOUSE	Srp54	sp|P14576|SRP54_MOUSE	sp|P14576|SRP54_MOUSE	Signal recognition particle 54 kDa protein OS=Mus musculus OX=10090 GN=Srp54 PE=1 SV=2	1	2	5.4	55.72	504	0.0022002	12.305	0//0	1//0	0//0	18126000	30	1			-1	604200	604200	22295000	1.40877e+07	9.69319	0.0154501
sp|P12367|KAP2_MOUSE	Prkar2a	sp|P12367|KAP2_MOUSE	sp|P12367|KAP2_MOUSE	cAMP-dependent protein kinase type II-alpha regulatory subunit OS=Mus musculus OX=10090 GN=Prkar2a PE=1 SV=2	1	2	6.7	45.389	401	0.00059988	16.127	0//0	1//0	0//0	11456000	19	2			-1	602920	602920	15082000	8.90328e+06	9.67266	0.0154174
sp|Q91YL3|UCKL1_MOUSE	Uckl1	sp|Q91YL3|UCKL1_MOUSE	sp|Q91YL3|UCKL1_MOUSE	Uridine-cytidine kinase-like 1 OS=Mus musculus OX=10090 GN=Uckl1 PE=1 SV=1	1	3	8.6	60.841	548	0	22.902	0//0	1//0	0//0	17424000	29	6			-1	600830	600830	23268000	1.35422e+07	9.63913	0.0153639
sp|Q9JIX8-3|ACINU_MOUSE	Acin1	sp|Q9JIX8-3|ACINU_MOUSE;sp|Q9JIX8-2|ACINU_MOUSE;sp|Q9JIX8-4|ACINU_MOUSE;sp|Q9JIX8|ACINU_MOUSE	sp|Q9JIX8-3|ACINU_MOUSE;sp|Q9JIX8-2|ACINU_MOUSE;sp|Q9JIX8-4|ACINU_MOUSE;sp|Q9JIX8|ACINU_MOUSE	Isoform 3 of Apoptotic chromatin condensation inducer in the nucleus OS=Mus musculus OX=10090 GN=Acin1;Isoform 2 of Apoptotic chromatin condensation inducer in the nucleus OS=Mus musculus OX=10090 GN=Acin1;Isoform 4 of Apoptotic chromatin condensation indu	4	3	7.1	65.356	565	0	21.413	0//0	1//0	0//0	14189000	24	6			-1;-1;-1;-1	591200	591200	18540000	1.10276e+07	9.48463	0.0151177
sp|Q9Z0F4|CIB1_MOUSE	Cib1	sp|Q9Z0F4|CIB1_MOUSE	sp|Q9Z0F4|CIB1_MOUSE	Calcium and integrin-binding protein 1 OS=Mus musculus OX=10090 GN=Cib1 PE=1 SV=3	1	2	14.1	21.763	191	0.00061614	17.806	0//0	1//0	0//0	8154600	14	3			-1	582470	582470	9639900	6.33786e+06	9.34458	0.0148944
sp|P20664|PRI1_MOUSE	Prim1	sp|P20664|PRI1_MOUSE	sp|P20664|PRI1_MOUSE	DNA primase small subunit OS=Mus musculus OX=10090 GN=Prim1 PE=1 SV=1	1	2	5	49.295	417	0.0011068	12.493	0//0	1//0	0//0	15549000	27	3			-1	575870	575870	20198000	1.20846e+07	9.23869	0.0147257
sp|Q9Z2A9|GGT5_MOUSE	Ggt5	sp|Q9Z2A9|GGT5_MOUSE;sp|Q9Z2A9-2|GGT5_MOUSE	sp|Q9Z2A9|GGT5_MOUSE;sp|Q9Z2A9-2|GGT5_MOUSE	Glutathione hydrolase 5 proenzyme OS=Mus musculus OX=10090 GN=Ggt5 PE=1 SV=2;Isoform 2 of Glutathione hydrolase 5 proenzyme OS=Mus musculus OX=10090 GN=Ggt5	2	2	6.3	61.673	573	0	26.377	0//0	1//0	0//0	13180000	23	2			-1;-1	573050	573050	16322000	1.02437e+07	9.19345	0.0146535
sp|Q8BMG7|RBGPR_MOUSE	Rab3gap2	sp|Q8BMG7|RBGPR_MOUSE	sp|Q8BMG7|RBGPR_MOUSE	Rab3 GTPase-activating protein non-catalytic subunit OS=Mus musculus OX=10090 GN=Rab3gap2 PE=1 SV=2	1	5	4.8	152.53	1366	0	32.927	0//0	1//0	0//0	33603000	59	7			-1	569550	569550	44188000	1.81389e+07	9.1373	0.014564
sp|P02533|K1C14_HUMAN	KRT14	sp|P02533|K1C14_HUMAN;CON__sp|P02533|K1C14_HUMAN;sp|Q04695|K1C17_HUMAN;CON__sp|Q04695|K1C17_HUMAN;sp|Q9QWL7|K1C17_MOUSE;sp|Q61414|K1C15_MOUSE;sp|P08779|K1C16_HUMAN;CON__sp|P08779|K1C16_HUMAN;sp|Q61781|K1C14_MOUSE;sp|P08727|K1C19_HUMAN;CON__sp|P08727|K1C19_HUMAN;sp|P19001|K1C19_MOUSE;sp|P19012|K1C15_HUMAN;CON__sp|P19012|K1C15_HUMAN;sp|Q6IFX2|K1C42_MOUSE	sp|P02533|K1C14_HUMAN;CON__sp|P02533|K1C14_HUMAN;sp|Q04695|K1C17_HUMAN;CON__sp|Q04695|K1C17_HUMAN;sp|Q9QWL7|K1C17_MOUSE;sp|Q61414|K1C15_MOUSE;sp|P08779|K1C16_HUMAN;CON__sp|P08779|K1C16_HUMAN;sp|Q61781|K1C14_MOUSE	Keratin, type I cytoskeletal 14 OS=Homo sapiens GN=KRT14 PE=1 SV=4;;Keratin, type I cytoskeletal 17 OS=Homo sapiens GN=KRT17 PE=1 SV=2;;Keratin, type I cytoskeletal 17 OS=Mus musculus OX=10090 GN=Krt17 PE=1 SV=3;Keratin, type I cytoskeletal 15 OS=Mus muscu	15	3	11.2	51.561	472	0	20.879	0//1	1//0	0//0	16899000	30	5		+	-1;-1;-1;-1;-1;-1;-1;-1;-1;-1;-1;-1;-1;-1;-1	563310	563310	21021000	1.31345e+07	9.03719	0.0144045
sp|Q8BH74|NU107_MOUSE	Nup107	sp|Q8BH74|NU107_MOUSE	sp|Q8BH74|NU107_MOUSE	Nuclear pore complex protein Nup107 OS=Mus musculus OX=10090 GN=Nup107 PE=1 SV=1	1	4	8.3	106.72	926	0	28.63	0//0	1//0	0//0	28379000	51	6			-1	556450	556450	38647000	2.05411e+07	8.92714	0.0142291
sp|Q6P8U6|LIPP_MOUSE	Pnlip	sp|Q6P8U6|LIPP_MOUSE	sp|Q6P8U6|LIPP_MOUSE	Pancreatic triacylglycerol lipase OS=Mus musculus OX=10090 GN=Pnlip PE=1 SV=1	1	2	7.1	51.427	465	0.0011933	15.791	0//0	1//0	0//0	11659000	21	1			-1	555170	555170	11659000	9.06113e+06	8.9066	0.0141963
sp|P57080|UBP25_MOUSE	Usp25	sp|P57080|UBP25_MOUSE	sp|P57080|UBP25_MOUSE	Ubiquitin carboxyl-terminal hydrolase 25 OS=Mus musculus OX=10090 GN=Usp25 PE=1 SV=2	1	5	6.3	121.42	1055	0	33.958	0//0	1//0	0//0	32754000	59	5			-1	555160	555160	43243000	2.09484e+07	8.90644	0.0141961
sp|Q99LM9|TADA1_MOUSE	Tada1	sp|Q99LM9|TADA1_MOUSE	sp|Q99LM9|TADA1_MOUSE	Transcriptional adapter 1 OS=Mus musculus OX=10090 GN=Tada1 PE=2 SV=1	1	3	11.3	37.408	335	0	34.225	0//0	1//0	0//0	7655900	14	5			-1	546850	546850	11788000	5.95018e+06	8.77312	0.0139836
sp|Q9WUU7|CATZ_MOUSE	Ctsz	sp|Q9WUU7|CATZ_MOUSE	sp|Q9WUU7|CATZ_MOUSE	Cathepsin Z OS=Mus musculus OX=10090 GN=Ctsz PE=1 SV=1	1	2	8.2	33.996	306	0.0011383	13.609	0//0	1//0	0//0	6975300	13	1			-1	536560	536560	8938700	5.42129e+06	8.60804	0.0137205
sp|P51125-7|ICAL_MOUSE	Cast	sp|P51125-7|ICAL_MOUSE;sp|P51125-3|ICAL_MOUSE;sp|P51125-2|ICAL_MOUSE;sp|P51125-6|ICAL_MOUSE;sp|P51125|ICAL_MOUSE;sp|P51125-5|ICAL_MOUSE;sp|P51125-4|ICAL_MOUSE	sp|P51125-7|ICAL_MOUSE;sp|P51125-3|ICAL_MOUSE;sp|P51125-2|ICAL_MOUSE;sp|P51125-6|ICAL_MOUSE;sp|P51125|ICAL_MOUSE;sp|P51125-5|ICAL_MOUSE;sp|P51125-4|ICAL_MOUSE	Isoform 7 of Calpastatin OS=Mus musculus OX=10090 GN=Cast;Isoform 3 of Calpastatin OS=Mus musculus OX=10090 GN=Cast;Isoform 2 of Calpastatin OS=Mus musculus OX=10090 GN=Cast;Isoform 6 of Calpastatin OS=Mus musculus OX=10090 GN=Cast;Calpastatin OS=Mus muscu	7	2	4.4	76.607	705	0.0011293	13.135	0//0	1//0	0//0	17661000	33	3			-1;-1;-1;-1;-1;-1;-1	535190	535190	19074000	1.37264e+07	8.58606	0.0136854
sp|Q9QYI3|DNJC7_MOUSE	Dnajc7	sp|Q9QYI3|DNJC7_MOUSE	sp|Q9QYI3|DNJC7_MOUSE	DnaJ homolog subfamily C member 7 OS=Mus musculus OX=10090 GN=Dnajc7 PE=1 SV=2	1	5	12.1	56.475	494	0	34.58	0//0	1//0	0//0	16422000	31	6			-1	529730	529730	18940000	1.12845e+07	8.49847	0.0135458
sp|P55096|ABCD3_MOUSE	Abcd3	sp|P55096|ABCD3_MOUSE	sp|P55096|ABCD3_MOUSE	ATP-binding cassette sub-family D member 3 OS=Mus musculus OX=10090 GN=Abcd3 PE=1 SV=2	1	2	4.2	75.474	659	0.0011669	14.54	0//0	1//0	0//0	18519000	35	4			-1	529100	529100	23325000	1.43929e+07	8.48836	0.0135297
sp|Q8BM55|TM214_MOUSE	Tmem214	sp|Q8BM55|TM214_MOUSE;sp|Q8BM55-3|TM214_MOUSE;sp|Q8BM55-2|TM214_MOUSE	sp|Q8BM55|TM214_MOUSE;sp|Q8BM55-3|TM214_MOUSE;sp|Q8BM55-2|TM214_MOUSE	Transmembrane protein 214 OS=Mus musculus OX=10090 GN=Tmem214 PE=1 SV=1;Isoform 3 of Transmembrane protein 214 OS=Mus musculus OX=10090 GN=Tmem214;Isoform 2 of Transmembrane protein 214 OS=Mus musculus OX=10090 GN=Tmem214	3	4	7.9	76.429	687	0	28.168	0//0	1//0	0//0	19242000	37	8			-1;-1;-1	520060	520060	24324000	1.49553e+07	8.34333	0.0132985
sp|P09581|CSF1R_MOUSE	Csf1r	sp|P09581|CSF1R_MOUSE	sp|P09581|CSF1R_MOUSE	Macrophage colony-stimulating factor 1 receptor OS=Mus musculus OX=10090 GN=Csf1r PE=1 SV=3	1	3	5.3	109.18	977	0	38.682	0//0	1//0	0//0	16563000	32	5			-1	517600	517600	19729000	1.2873e+07	8.30387	0.0132356
sp|O08912|GALT1_MOUSE	Galnt1	sp|O08912|GALT1_MOUSE	sp|O08912|GALT1_MOUSE	Polypeptide N-acetylgalactosaminyltransferase 1 OS=Mus musculus OX=10090 GN=Galnt1 PE=1 SV=1	1	6	15.9	64.254	559	0	48.669	0//0	1//0	0//0	14235000	28	9			-1	508400	508400	19389000	1.10637e+07	8.15627	0.0130004
sp|Q9R099|TBL2_MOUSE	Tbl2	sp|Q9R099|TBL2_MOUSE	sp|Q9R099|TBL2_MOUSE	Transducin beta-like protein 2 OS=Mus musculus OX=10090 GN=Tbl2 PE=1 SV=2	1	2	5.4	49.583	442	0.0011507	14.015	0//0	1//0	0//0	12619000	25	2			-1	504770	504770	15236000	9.80788e+06	8.09803	0.0129075
sp|Q9D6Z1|NOP56_MOUSE	Nop56	sp|Q9D6Z1|NOP56_MOUSE	sp|Q9D6Z1|NOP56_MOUSE	Nucleolar protein 56 OS=Mus musculus OX=10090 GN=Nop56 PE=1 SV=2	1	2	4.3	64.464	580	0	19.904	0//0	1//0	0//0	15624000	31	2			-1	504000	504000	20044000	1.2143e+07	8.08568	0.0128879
sp|E9Q634|MYO1E_MOUSE	Myo1e	sp|E9Q634|MYO1E_MOUSE	sp|E9Q634|MYO1E_MOUSE	Unconventional myosin-Ie OS=Mus musculus OX=10090 GN=Myo1e PE=1 SV=1	1	2	3.1	126.82	1107	0.0011448	13.811	0//0	1//0	0//0	28939000	58	5			-1	498940	498940	38044000	2.24914e+07	8.0045	0.0127585
sp|Q8BX17|GEMI5_MOUSE	Gemin5	sp|Q8BX17|GEMI5_MOUSE	sp|Q8BX17|GEMI5_MOUSE	Gem-associated protein 5 OS=Mus musculus OX=10090 GN=Gemin5 PE=1 SV=2	1	3	2.6	166.59	1502	0	66.609	0//0	1//0	0//0	37912000	76	6			-1	498840	498840	49088000	2.94656e+07	8.0029	0.0127559
sp|Q6DIA2|EX3L4_MOUSE	Exoc3l4	sp|Q6DIA2|EX3L4_MOUSE	sp|Q6DIA2|EX3L4_MOUSE	Exocyst complex component 3-like protein 4 OS=Mus musculus OX=10090 GN=Exoc3l4 PE=1 SV=2	1	4	8	81.034	721	0	47.19	0//0	1//0	0//0	17781000	36	7			-1	493910	493910	22970000	1.38195e+07	7.92381	0.0126298
sp|O70194|EIF3D_MOUSE	Eif3d	sp|O70194|EIF3D_MOUSE	sp|O70194|EIF3D_MOUSE	Eukaryotic translation initiation factor 3 subunit D OS=Mus musculus OX=10090 GN=Eif3d PE=1 SV=2	1	3	5.8	63.988	548	0.00062189	18.293	0//0	1//0	0//0	11795000	24	2			-1	491450	491450	16419000	9.16699e+06	7.88434	0.0125669
sp|Q8K1E0-2|STX5_MOUSE	Stx5	sp|Q8K1E0-2|STX5_MOUSE;sp|Q8K1E0|STX5_MOUSE	sp|Q8K1E0-2|STX5_MOUSE;sp|Q8K1E0|STX5_MOUSE	Isoform 2 of Syntaxin-5 OS=Mus musculus OX=10090 GN=Stx5;Syntaxin-5 OS=Mus musculus OX=10090 GN=Stx5 PE=1 SV=3	2	2	9.3	34.103	301	0.0011142	12.844	0//0	1//0	0//0	8297700	17	3			-1;-1	488100	488100	11243000	6.44908e+06	7.8306	0.0124813
sp|Q8BJZ4|RT35_MOUSE	Mrps35	sp|Q8BJZ4|RT35_MOUSE	sp|Q8BJZ4|RT35_MOUSE	28S ribosomal protein S35, mitochondrial OS=Mus musculus OX=10090 GN=Mrps35 PE=1 SV=2	1	2	12.5	35.975	320	0.0021798	12.042	0//0	1//0	0//0	8780500	18	2			-1	487800	487800	10639000	6.82431e+06	7.82578	0.0124736
sp|Q91WQ3|SYYC_MOUSE	Yars1	sp|Q91WQ3|SYYC_MOUSE	sp|Q91WQ3|SYYC_MOUSE	Tyrosine--tRNA ligase, cytoplasmic OS=Mus musculus OX=10090 GN=Yars1 PE=1 SV=3	1	3	7.8	59.105	528	0	18.846	0//0	1//0	0//0	18009000	37	4			-1	486730	486730	22525000	1.39967e+07	7.80862	0.0124462
sp|Q6PGF7|EXOC8_MOUSE	Exoc8	sp|Q6PGF7|EXOC8_MOUSE	sp|Q6PGF7|EXOC8_MOUSE	Exocyst complex component 8 OS=Mus musculus OX=10090 GN=Exoc8 PE=1 SV=1	1	4	8.4	81.034	716	0	35.663	0//0	1//0	0//0	21584000	45	6			-1	479640	479640	27317000	1.52422e+07	7.69487	0.0122649
sp|Q61037-7|TSC2_MOUSE	Tsc2	sp|Q61037-7|TSC2_MOUSE;sp|Q61037-6|TSC2_MOUSE;sp|Q61037-4|TSC2_MOUSE;sp|Q61037-3|TSC2_MOUSE;sp|Q61037-2|TSC2_MOUSE;sp|Q61037-5|TSC2_MOUSE;sp|Q61037|TSC2_MOUSE	sp|Q61037-7|TSC2_MOUSE;sp|Q61037-6|TSC2_MOUSE;sp|Q61037-4|TSC2_MOUSE;sp|Q61037-3|TSC2_MOUSE;sp|Q61037-2|TSC2_MOUSE;sp|Q61037-5|TSC2_MOUSE;sp|Q61037|TSC2_MOUSE	Isoform F of Tuberin OS=Mus musculus OX=10090 GN=Tsc2;Isoform E of Tuberin OS=Mus musculus OX=10090 GN=Tsc2;Isoform C of Tuberin OS=Mus musculus OX=10090 GN=Tsc2;Isoform B of Tuberin OS=Mus musculus OX=10090 GN=Tsc2;Isoform A of Tuberin OS=Mus musculus OX=	7	5	5	189.85	1704	0	40.875	0//0	1//0	1//0	38245000	80	7			-1;-1;-1;-1;-1;-1;-1	478060	478060	47780000	2.3679e+07	7.66952	0.0122245
sp|Q80X82|SYMPK_MOUSE	Sympk	sp|Q80X82|SYMPK_MOUSE	sp|Q80X82|SYMPK_MOUSE	Symplekin OS=Mus musculus OX=10090 GN=Sympk PE=1 SV=2	1	5	5.9	142.62	1288	0	53.312	0//0	1//0	0//0	31234000	66	5			-1	473250	473250	39438000	2.10913e+07	7.59236	0.0121015
sp|Q9WVL2|STAT2_MOUSE	Stat2	sp|Q9WVL2|STAT2_MOUSE	sp|Q9WVL2|STAT2_MOUSE	Signal transducer and activator of transcription 2 OS=Mus musculus OX=10090 GN=Stat2 PE=1 SV=1	1	4	4.9	105.42	923	0	24.319	0//0	1//0	0//0	18755000	40	8			-1	468880	468880	23247000	1.3349e+07	7.52225	0.0119898
sp|Q91XV3|BASP1_MOUSE	Basp1	sp|Q91XV3|BASP1_MOUSE	sp|Q91XV3|BASP1_MOUSE	Brain acid soluble protein 1 OS=Mus musculus OX=10090 GN=Basp1 PE=1 SV=3	1	2	15.9	22.086	226	0.002103	10.587	0//0	1//0	0//0	4608400	10	2			-1	460840	460840	5582300	3.58178e+06	7.39326	0.0117842
sp|P97760|RPB3_MOUSE	Polr2c	sp|P97760|RPB3_MOUSE	sp|P97760|RPB3_MOUSE	DNA-directed RNA polymerase II subunit RPB3 OS=Mus musculus OX=10090 GN=Polr2c PE=1 SV=2	1	2	8.7	31.443	275	0.0021064	10.625	0//0	1//0	0//0	6393300	14	0			-1	456660	456660	8131500	4.96884e+06	7.3262	0.0116773
sp|Q920A5|RISC_MOUSE	Scpep1	sp|Q920A5|RISC_MOUSE	sp|Q920A5|RISC_MOUSE	Retinoid-inducible serine carboxypeptidase OS=Mus musculus OX=10090 GN=Scpep1 PE=1 SV=2	1	3	8.6	50.964	452	0	27.867	0//0	1//0	0//0	8188500	18	4			-1	454920	454920	9969000	6.3642e+06	7.29829	0.0116328
sp|Q7TPZ8|CBPA1_MOUSE	Cpa1	sp|Q7TPZ8|CBPA1_MOUSE	sp|Q7TPZ8|CBPA1_MOUSE	Carboxypeptidase A1 OS=Mus musculus OX=10090 GN=Cpa1 PE=1 SV=1	1	2	6.4	47.384	419	0.00060864	17.242	0//0	1//0	0//0	9084500	20	3			-1	454220	454220	12204000	7.06059e+06	7.28706	0.0116149
sp|Q60928|GGT1_MOUSE	Ggt1	sp|Q60928|GGT1_MOUSE	sp|Q60928|GGT1_MOUSE	Glutathione hydrolase 1 proenzyme OS=Mus musculus OX=10090 GN=Ggt1 PE=1 SV=1	1	4	7.9	61.562	568	0	48.032	0//0	1//0	0//0	12148000	27	4			-1	449920	449920	14350000	9.44142e+06	7.21807	0.011505
sp|Q8R2K4-2|TAF6L_MOUSE	Taf6l	sp|Q8R2K4-2|TAF6L_MOUSE;sp|Q8R2K4|TAF6L_MOUSE	sp|Q8R2K4-2|TAF6L_MOUSE;sp|Q8R2K4|TAF6L_MOUSE	Isoform 2 of TAF6-like RNA polymerase II p300/CBP-associated factor-associated factor 65 kDa subunit 6L OS=Mus musculus OX=10090 GN=Taf6l;TAF6-like RNA polymerase II p300/CBP-associated factor-associated factor 65 kDa subunit 6L OS=Mus musculus OX=10090 GN	2	2	4.7	64.543	591	0.0021471	11.418	0//0	1//0	0//0	10650000	24	1			-1;-1	443740	443740	12464000	8.27708e+06	7.11893	0.0113469
sp|Q3TUH1|TAM41_MOUSE	Tamm41	sp|Q3TUH1|TAM41_MOUSE;sp|Q3TUH1-2|TAM41_MOUSE	sp|Q3TUH1|TAM41_MOUSE;sp|Q3TUH1-2|TAM41_MOUSE	Phosphatidate cytidylyltransferase, mitochondrial OS=Mus musculus OX=10090 GN=Tamm41 PE=1 SV=2;Isoform 2 of Phosphatidate cytidylyltransferase, mitochondrial OS=Mus musculus OX=10090 GN=Tamm41	2	2	10.4	37.827	337	0.0011136	12.836	0//0	1//0	0//0	7443800	17	2			-1;-1	437870	437870	9573700	5.78549e+06	7.02476	0.0111968
sp|Q9EP89|LACTB_MOUSE	Lactb	sp|Q9EP89|LACTB_MOUSE	sp|Q9EP89|LACTB_MOUSE	Serine beta-lactamase-like protein LACTB, mitochondrial OS=Mus musculus OX=10090 GN=Lactb PE=1 SV=1	1	2	4	60.705	551	0.0021448	11.364	0//0	1//0	0//0	10047000	23	3			-1	436820	436820	12196000	7.8085e+06	7.00791	0.01117
sp|Q9CXF4|TBC15_MOUSE	Tbc1d15	sp|Q9CXF4|TBC15_MOUSE	sp|Q9CXF4|TBC15_MOUSE	TBC1 domain family member 15 OS=Mus musculus OX=10090 GN=Tbc1d15 PE=1 SV=1	1	3	6.6	76.526	671	0.00061162	17.499	0//0	1//0	0//0	15216000	35	1			-1	434730	434730	18324000	1.18259e+07	6.97438	0.0111165
sp|P20152|VIME_MOUSE	Vim	sp|P20152|VIME_MOUSE;sp|P08670|VIME_HUMAN;CON__sp|P08670|VIME_HUMAN	sp|P20152|VIME_MOUSE;sp|P08670|VIME_HUMAN;CON__sp|P08670|VIME_HUMAN	Vimentin OS=Mus musculus OX=10090 GN=Vim PE=1 SV=3;Vimentin OS=Homo sapiens GN=VIM PE=1 SV=4;	3	2	4.1	53.687	466	0.0021942	12.256	0//0	1//0	0//0	13695000	32	4		+	-1;-1;-1	427980	427980	17042000	1.06442e+07	6.86609	0.0109439
sp|Q6URW6-2|MYH14_MOUSE	Myh14	sp|Q6URW6-2|MYH14_MOUSE;sp|Q6URW6|MYH14_MOUSE;sp|Q6URW6-3|MYH14_MOUSE	sp|Q6URW6-2|MYH14_MOUSE;sp|Q6URW6|MYH14_MOUSE;sp|Q6URW6-3|MYH14_MOUSE	Isoform 2 of Myosin-14 OS=Mus musculus OX=10090 GN=Myh14;Myosin-14 OS=Mus musculus OX=10090 GN=Myh14 PE=1 SV=1;Isoform 3 of Myosin-14 OS=Mus musculus OX=10090 GN=Myh14	3	2	4.1	227.76	1992	0.0011331	13.424	0//1	1//0	0//1	43442000	102	3			-1;-1;-1	425900	425900	51539000	3.37635e+07	6.83272	0.0108908
sp|Q9CQA5-2|MED4_MOUSE	Med4	sp|Q9CQA5-2|MED4_MOUSE;sp|Q9CQA5|MED4_MOUSE	sp|Q9CQA5-2|MED4_MOUSE;sp|Q9CQA5|MED4_MOUSE	Isoform 2 of Mediator of RNA polymerase II transcription subunit 4 OS=Mus musculus OX=10090 GN=Med4;Mediator of RNA polymerase II transcription subunit 4 OS=Mus musculus OX=10090 GN=Med4 PE=2 SV=1	2	3	22.6	19.868	177	0	39.316	0//0	1//0	0//0	5109600	12	4			-1;-1	425800	425800	5668000	3.97117e+06	6.83112	0.0108882
sp|Q8VCF1-3|CANT1_MOUSE	Cant1	sp|Q8VCF1-3|CANT1_MOUSE;sp|Q8VCF1|CANT1_MOUSE;sp|Q8VCF1-2|CANT1_MOUSE	sp|Q8VCF1-3|CANT1_MOUSE;sp|Q8VCF1|CANT1_MOUSE;sp|Q8VCF1-2|CANT1_MOUSE	Isoform 3 of Soluble calcium-activated nucleotidase 1 OS=Mus musculus OX=10090 GN=Cant1;Soluble calcium-activated nucleotidase 1 OS=Mus musculus OX=10090 GN=Cant1 PE=2 SV=1;Isoform 2 of Soluble calcium-activated nucleotidase 1 OS=Mus musculus OX=10090 GN=C	3	2	6.4	49.565	440	0.0021645	11.742	0//0	1//0	0//0	11465000	27	2			-1;-1;-1	424630	424630	15345000	8.91066e+06	6.81235	0.0108583
sp|Q8BLY7|HPS6_MOUSE	Hps6	sp|Q8BLY7|HPS6_MOUSE	sp|Q8BLY7|HPS6_MOUSE	Hermansky-Pudlak syndrome 6 protein homolog OS=Mus musculus OX=10090 GN=Hps6 PE=1 SV=3	1	2	5.3	87.34	805	0.0011198	12.951	0//0	1//0	0//0	15184000	36	3			-1	421790	421790	18368000	1.18015e+07	6.76678	0.0107857
sp|Q8R3H7|HS2ST_MOUSE	Hs2st1	sp|Q8R3H7|HS2ST_MOUSE	sp|Q8R3H7|HS2ST_MOUSE	Heparan sulfate 2-O-sulfotransferase 1 OS=Mus musculus OX=10090 GN=Hs2st1 PE=1 SV=2	1	2	9.3	41.813	356	0.0011969	15.941	0//0	1//0	0//0	7549600	18	2			-1	419420	419420	9617400	5.86764e+06	6.72876	0.010725
sp|Q6PFD9|NUP98_MOUSE	Nup98	sp|Q6PFD9|NUP98_MOUSE	sp|Q6PFD9|NUP98_MOUSE	Nuclear pore complex protein Nup98-Nup96 OS=Mus musculus OX=10090 GN=Nup98 PE=1 SV=2	1	5	4.1	197.24	1816	0	33.653	0//0	1//0	0//0	29063000	70	4			-1	415190	415190	36177000	1.81767e+07	6.6609	0.0106169
sp|Q8BQZ4|RLGPB_MOUSE	Ralgapb	sp|Q8BQZ4|RLGPB_MOUSE;sp|Q8BQZ4-2|RLGPB_MOUSE	sp|Q8BQZ4|RLGPB_MOUSE;sp|Q8BQZ4-2|RLGPB_MOUSE	Ral GTPase-activating protein subunit beta OS=Mus musculus OX=10090 GN=Ralgapb PE=1 SV=2;Isoform 2 of Ral GTPase-activating protein subunit beta OS=Mus musculus OX=10090 GN=Ralgapb	2	4	4.7	165.2	1484	0	20.999	0//0	1//0	0//0	27778000	67	7			-1;-1	414600	414600	36289000	1.87635e+07	6.65144	0.0106018
sp|Q9CZ04|CSN7A_MOUSE	Cops7a	sp|Q9CZ04|CSN7A_MOUSE;sp|Q9CZ04-2|CSN7A_MOUSE	sp|Q9CZ04|CSN7A_MOUSE;sp|Q9CZ04-2|CSN7A_MOUSE	COP9 signalosome complex subunit 7a OS=Mus musculus OX=10090 GN=Cops7a PE=1 SV=2;Isoform 2 of COP9 signalosome complex subunit 7a OS=Mus musculus OX=10090 GN=Cops7a	2	2	10.9	30.224	275	0.00060314	16.553	0//0	1//0	0//0	5790200	14	2			-1;-1	413590	413590	7905500	4.50014e+06	6.63523	0.010576
sp|Q80XN0|BDH_MOUSE	Bdh1	sp|Q80XN0|BDH_MOUSE	sp|Q80XN0|BDH_MOUSE	D-beta-hydroxybutyrate dehydrogenase, mitochondrial OS=Mus musculus OX=10090 GN=Bdh1 PE=1 SV=2	1	2	7	38.299	343	0.001139	13.615	0//0	1//0	0//0	7011300	17	2			-1	412430	412430	9099200	5.44935e+06	6.61662	0.0105463
sp|G3X987|GIMA9_MOUSE	Gimap9	sp|G3X987|GIMA9_MOUSE	sp|G3X987|GIMA9_MOUSE	GTPase IMAP family member 9 OS=Mus musculus OX=10090 GN=Gimap9 PE=1 SV=1	1	2	7.6	33.298	291	0.0011223	12.971	0//0	1//0	0//0	7332600	18	2			-1	407360	407360	9692500	5.69891e+06	6.53528	0.0104167
sp|Q9WV80|SNX1_MOUSE	Snx1	sp|Q9WV80|SNX1_MOUSE	sp|Q9WV80|SNX1_MOUSE	Sorting nexin-1 OS=Mus musculus OX=10090 GN=Snx1 PE=1 SV=1	1	2	9	58.951	522	0.0011594	14.363	0//0	1//0	0//0	9284200	23	3			-1	403660	403660	12391000	7.21587e+06	6.47592	0.010322
sp|Q8R313|EXOC6_MOUSE	Exoc6	sp|Q8R313|EXOC6_MOUSE	sp|Q8R313|EXOC6_MOUSE	Exocyst complex component 6 OS=Mus musculus OX=10090 GN=Exoc6 PE=1 SV=2	1	4	6.5	93.076	802	0	29.352	0//0	1//0	0//0	17053000	43	4			-1	396590	396590	20255000	1.32542e+07	6.3625	0.0101413
sp|Q61696|HS71A_MOUSE	Hspa1a	sp|Q61696|HS71A_MOUSE;sp|P17879|HS71B_MOUSE	sp|Q61696|HS71A_MOUSE;sp|P17879|HS71B_MOUSE	Heat shock 70 kDa protein 1A OS=Mus musculus OX=10090 GN=Hspa1a PE=1 SV=2;Heat shock 70 kDa protein 1B OS=Mus musculus OX=10090 GN=Hspa1b PE=1 SV=3	2	2	12	70.078	641	0.0021053	10.625	0//1	1//0	0//1	13078000	33	2			-1;-1	396310	396310	16202000	1.01646e+07	6.35801	0.0101341
sp|P52293|IMA1_MOUSE	Kpna2	sp|P52293|IMA1_MOUSE	sp|P52293|IMA1_MOUSE	Importin subunit alpha-1 OS=Mus musculus OX=10090 GN=Kpna2 PE=1 SV=2	1	2	6.2	57.927	529	0	19.774	0//0	1//0	0//0	8708200	22	5			-1	395830	395830	10206000	6.7682e+06	6.35031	0.0101218
sp|Q91X78|ERLN1_MOUSE	Erlin1	sp|Q91X78|ERLN1_MOUSE	sp|Q91X78|ERLN1_MOUSE	Erlin-1 OS=Mus musculus OX=10090 GN=Erlin1 PE=1 SV=2	1	2	12.6	39.182	348	0.0011481	13.893	0//0	1//0	0//0	7892900	20	2			-1	394640	394640	8615100	6.13446e+06	6.33122	0.0100914
sp|Q8R0Y8|S2542_MOUSE	Slc25a42	sp|Q8R0Y8|S2542_MOUSE	sp|Q8R0Y8|S2542_MOUSE	Mitochondrial coenzyme A transporter SLC25A42 OS=Mus musculus OX=10090 GN=Slc25a42 PE=1 SV=1	1	2	12.3	35.24	318	0.00060938	17.339	0//0	1//0	0//0	7021300	18	5			-1	390070	390070	8941500	5.45696e+06	6.2579	0.00997454
sp|Q8K209|AGRG1_MOUSE	Adgrg1	sp|Q8K209|AGRG1_MOUSE	sp|Q8K209|AGRG1_MOUSE	Adhesion G-protein coupled receptor G1 OS=Mus musculus OX=10090 GN=Adgrg1 PE=1 SV=1	1	2	2.6	77.254	687	0.0011148	12.858	0//0	1//0	0//0	10452000	27	4			-1	387100	387100	13561000	8.12328e+06	6.21025	0.00989859
sp|G5E829|AT2B1_MOUSE	Atp2b1	sp|G5E829|AT2B1_MOUSE;sp|Q9R0K7|AT2B2_MOUSE;sp|Q6Q477-2|AT2B4_MOUSE;sp|Q6Q477|AT2B4_MOUSE	sp|G5E829|AT2B1_MOUSE;sp|Q9R0K7|AT2B2_MOUSE	Plasma membrane calcium-transporting ATPase 1 OS=Mus musculus OX=10090 GN=Atp2b1 PE=1 SV=1;Plasma membrane calcium-transporting ATPase 2 OS=Mus musculus OX=10090 GN=Atp2b2 PE=1 SV=2	4	3	3.2	134.75	1220	0	23.61	0//0	1//0	0//0	19032000	50	6			-1;-1;-1;-1	380640	380640	22744000	1.4792e+07	6.10661	0.0097334
sp|Q9ERU9|RBP2_MOUSE	Ranbp2	sp|Q9ERU9|RBP2_MOUSE	sp|Q9ERU9|RBP2_MOUSE	E3 SUMO-protein ligase RanBP2 OS=Mus musculus OX=10090 GN=Ranbp2 PE=1 SV=2	1	7	3.2	341.12	3053	0	77.493	0//0	1//0	0//0	61254000	161	11			-1	380460	380460	79114000	2.76627e+07	6.10373	0.0097288
sp|Q9DB41-2|GHC2_MOUSE	Slc25a18	sp|Q9DB41-2|GHC2_MOUSE;sp|Q9DB41|GHC2_MOUSE;sp|Q9D6M3|GHC1_MOUSE	sp|Q9DB41-2|GHC2_MOUSE;sp|Q9DB41|GHC2_MOUSE;sp|Q9D6M3|GHC1_MOUSE	Isoform 2 of Mitochondrial glutamate carrier 2 OS=Mus musculus OX=10090 GN=Slc25a18;Mitochondrial glutamate carrier 2 OS=Mus musculus OX=10090 GN=Slc25a18 PE=1 SV=4;Mitochondrial glutamate carrier 1 OS=Mus musculus OX=10090 GN=Slc25a22 PE=1 SV=1	3	2	5.1	33.304	312	0.0021482	11.474	0//0	1//0	1//0	6726200	18	2			-1;-1;-1	373680	373680	7803200	5.22769e+06	5.99495	0.00955543
sp|B9EJ86|OSBL8_MOUSE	Osbpl8	sp|B9EJ86|OSBL8_MOUSE	sp|B9EJ86|OSBL8_MOUSE	Oxysterol-binding protein-related protein 8 OS=Mus musculus OX=10090 GN=Osbpl8 PE=1 SV=1	1	3	3.4	101.27	889	0	18.845	0//0	1//0	0//0	19420000	52	5			-1	373470	373470	24415000	1.50939e+07	5.99159	0.00955006
sp|Q8BKT3-2|GCFC2_MOUSE	Gcfc2	sp|Q8BKT3-2|GCFC2_MOUSE;sp|Q8BKT3|GCFC2_MOUSE	sp|Q8BKT3-2|GCFC2_MOUSE;sp|Q8BKT3|GCFC2_MOUSE	Isoform 2 of Intron Large complex component GCFC2 OS=Mus musculus OX=10090 GN=Gcfc2;Intron Large complex component GCFC2 OS=Mus musculus OX=10090 GN=Gcfc2 PE=1 SV=2	2	2	6.2	45.927	405	0.0011501	13.924	0//0	1//0	0//0	8435300	23	2			-1;-1	366750	366750	8435300	6.55602e+06	5.88378	0.00937822
sp|Q9EPE9|AT131_MOUSE	Atp13a1	sp|Q9EPE9|AT131_MOUSE	sp|Q9EPE9|AT131_MOUSE	Endoplasmic reticulum transmembrane helix translocase OS=Mus musculus OX=10090 GN=Atp13a1 PE=1 SV=2	1	4	3.7	132.39	1200	0	26.172	0//0	1//0	0//0	19668000	54	5			-1	364220	364220	25968000	1.34584e+07	5.84319	0.00931352
sp|Q921G6|LRCH4_MOUSE	Lrch4	sp|Q921G6|LRCH4_MOUSE	sp|Q921G6|LRCH4_MOUSE	Leucine-rich repeat and calponin homology domain-containing protein 4 OS=Mus musculus OX=10090 GN=Lrch4 PE=1 SV=1	1	2	4.6	73.162	680	0.0011813	15.27	0//0	1//0	0//0	10035000	29	1			-1	346050	346050	12457000	7.79956e+06	5.55169	0.00884889
sp|Q3U2I3|F16A2_MOUSE	Fam160a2	sp|Q3U2I3|F16A2_MOUSE;sp|Q3U2I3-2|F16A2_MOUSE;sp|Q3U2I3-3|F16A2_MOUSE	sp|Q3U2I3|F16A2_MOUSE;sp|Q3U2I3-2|F16A2_MOUSE;sp|Q3U2I3-3|F16A2_MOUSE	FTS and Hook-interacting protein OS=Mus musculus OX=10090 GN=Fam160a2 PE=1 SV=2;Isoform 2 of FTS and Hook-interacting protein OS=Mus musculus OX=10090 GN=Fam160a2;Isoform 3 of FTS and Hook-interacting protein OS=Mus musculus OX=10090 GN=Fam160a2	3	2	3.2	106.54	975	0.0011765	15.087	0//0	1//0	0//0	14507000	42	1			-1;-1;-1	345410	345410	18532000	1.12751e+07	5.54142	0.00883253
sp|Q8N7N5-2|DCAF8_MOUSE	Dcaf8	sp|Q8N7N5-2|DCAF8_MOUSE;sp|Q8N7N5|DCAF8_MOUSE	sp|Q8N7N5-2|DCAF8_MOUSE;sp|Q8N7N5|DCAF8_MOUSE	Isoform 2 of DDB1- and CUL4-associated factor 8 OS=Mus musculus OX=10090 GN=Dcaf8;DDB1- and CUL4-associated factor 8 OS=Mus musculus OX=10090 GN=Dcaf8 PE=1 SV=1	2	2	5.6	45.725	411	0.0011884	15.503	0//0	1//0	0//0	8540600	25	1			-1;-1	341630	341630	10202000	6.63786e+06	5.48078	0.00873587
sp|Q8CIG8|ANM5_MOUSE	Prmt5	sp|Q8CIG8|ANM5_MOUSE	sp|Q8CIG8|ANM5_MOUSE	Protein arginine N-methyltransferase 5 OS=Mus musculus OX=10090 GN=Prmt5 PE=1 SV=3	1	2	3.5	72.679	637	0.0011344	13.453	0//0	1//0	0//0	11499000	34	4			-1	338200	338200	14114000	8.93717e+06	5.42575	0.00864816
sp|Q8K2Z4|CND1_MOUSE	Ncapd2	sp|Q8K2Z4|CND1_MOUSE;sp|Q8K2Z4-2|CND1_MOUSE	sp|Q8K2Z4|CND1_MOUSE;sp|Q8K2Z4-2|CND1_MOUSE	Condensin complex subunit 1 OS=Mus musculus OX=10090 GN=Ncapd2 PE=1 SV=2;Isoform 2 of Condensin complex subunit 1 OS=Mus musculus OX=10090 GN=Ncapd2	2	4	7.5	155.66	1392	0	45.845	0//0	1//0	0//0	25207000	75	5			-1;-1	336100	336100	29920000	1.78842e+07	5.39206	0.00859446
sp|Q61543|GSLG1_MOUSE	Glg1	sp|Q61543|GSLG1_MOUSE	sp|Q61543|GSLG1_MOUSE	Golgi apparatus protein 1 OS=Mus musculus OX=10090 GN=Glg1 PE=1 SV=1	1	3	2.9	133.73	1175	0	19.342	0//0	1//0	0//0	20150000	60	3			-1	335840	335840	24792000	1.5661e+07	5.38789	0.00858781
sp|Q9DBE8|ALG2_MOUSE	Alg2	sp|Q9DBE8|ALG2_MOUSE	sp|Q9DBE8|ALG2_MOUSE	Alpha-1,3/1,6-mannosyltransferase ALG2 OS=Mus musculus OX=10090 GN=Alg2 PE=1 SV=2	1	2	6	47.404	415	0	19.045	0//0	1//0	0//0	7240000	22	2			-1	329090	329090	11178000	5.62702e+06	5.2796	0.00841521
sp|P17427|AP2A2_MOUSE	Ap2a2	sp|P17427|AP2A2_MOUSE;sp|P17426-2|AP2A1_MOUSE;sp|P17426|AP2A1_MOUSE	sp|P17427|AP2A2_MOUSE;sp|P17426-2|AP2A1_MOUSE;sp|P17426|AP2A1_MOUSE	AP-2 complex subunit alpha-2 OS=Mus musculus OX=10090 GN=Ap2a2 PE=1 SV=2;Isoform B of AP-2 complex subunit alpha-1 OS=Mus musculus OX=10090 GN=Ap2a1;AP-2 complex subunit alpha-1 OS=Mus musculus OX=10090 GN=Ap2a1 PE=1 SV=1	3	2	3.5	104.02	938	0.0011435	13.77	0//0	1//0	0//0	16016000	49	4			-1;-1;-1	326860	326860	19906000	1.24478e+07	5.24382	0.00835818
sp|Q04863|RELB_MOUSE	Relb	sp|Q04863|RELB_MOUSE	sp|Q04863|RELB_MOUSE	Transcription factor RelB OS=Mus musculus OX=10090 GN=Relb PE=1 SV=2	1	2	6.1	60.305	558	0.0021153	10.822	0//0	1//0	0//0	9150300	28	1			-1	326800	326800	10740000	7.1118e+06	5.24286	0.00835665
sp|Q9D832|DNJB4_MOUSE	Dnajb4	sp|Q9D832|DNJB4_MOUSE	sp|Q9D832|DNJB4_MOUSE	DnaJ homolog subfamily B member 4 OS=Mus musculus OX=10090 GN=Dnajb4 PE=1 SV=1	1	2	11.9	37.781	337	0.0011455	13.85	0//0	1//0	0//0	5854000	18	2			-1	325220	325220	7479700	4.5498e+06	5.21751	0.00831625
sp|E9QAT4|SC16A_MOUSE	Sec16a	sp|E9QAT4|SC16A_MOUSE;sp|E9QAT4-2|SC16A_MOUSE	sp|E9QAT4|SC16A_MOUSE;sp|E9QAT4-2|SC16A_MOUSE	Protein transport protein Sec16A OS=Mus musculus OX=10090 GN=Sec16a PE=1 SV=1;Isoform 2 of Protein transport protein Sec16A OS=Mus musculus OX=10090 GN=Sec16a	2	5	3.5	254.2	2357	0	27.899	0//0	1//0	0//0	26689000	83	6			-1;-1	321560	321560	32437000	1.87705e+07	5.15879	0.00822266
sp|Q3U7R1|ESYT1_MOUSE	Esyt1	sp|Q3U7R1|ESYT1_MOUSE;sp|Q3U7R1-2|ESYT1_MOUSE	sp|Q3U7R1|ESYT1_MOUSE;sp|Q3U7R1-2|ESYT1_MOUSE	Extended synaptotagmin-1 OS=Mus musculus OX=10090 GN=Esyt1 PE=1 SV=2;Isoform 2 of Extended synaptotagmin-1 OS=Mus musculus OX=10090 GN=Esyt1	2	3	3.8	121.55	1092	0.0006068	17.112	0//0	1//0	0//0	14987000	47	3			-1;-1	318870	318870	19745000	1.16481e+07	5.11564	0.00815387
sp|Q9CZU3|MTREX_MOUSE	Mtrex	sp|Q9CZU3|MTREX_MOUSE	sp|Q9CZU3|MTREX_MOUSE	Exosome RNA helicase MTR4 OS=Mus musculus OX=10090 GN=Mtrex PE=1 SV=1	1	4	4.9	117.64	1040	0	32.164	0//0	1//0	0//0	16969000	55	6			-1	308530	308530	21476000	1.31885e+07	4.94975	0.00788947
sp|P11679|K2C8_MOUSE	Krt8	sp|P11679|K2C8_MOUSE;sp|P05787|K2C8_HUMAN;CON__sp|P05787|K2C8_HUMAN	sp|P11679|K2C8_MOUSE;sp|P05787|K2C8_HUMAN;CON__sp|P05787|K2C8_HUMAN	Keratin, type II cytoskeletal 8 OS=Mus musculus OX=10090 GN=Krt8 PE=1 SV=4;Keratin, type II cytoskeletal 8 OS=Homo sapiens GN=KRT8 PE=1 SV=7;	3	2	8.4	54.565	490	0.0011074	12.51	0//1	1//0	0//1	9205200	30	1		+	-1;-1;-1	306840	306840	10918000	7.1544e+06	4.92264	0.00784625
sp|Q99K74|MED24_MOUSE	Med24	sp|Q99K74|MED24_MOUSE;sp|Q99K74-2|MED24_MOUSE;sp|Q99K74-3|MED24_MOUSE	sp|Q99K74|MED24_MOUSE;sp|Q99K74-2|MED24_MOUSE	Mediator of RNA polymerase II transcription subunit 24 OS=Mus musculus OX=10090 GN=Med24 PE=1 SV=1;Isoform 2 of Mediator of RNA polymerase II transcription subunit 24 OS=Mus musculus OX=10090 GN=Med24	3	3	4.8	109.98	987	0	24.519	0//0	1//0	0//0	13977000	46	4			-1;-1;-1	303850	303850	18777000	1.08634e+07	4.87467	0.00776979
sp|Q8CIF6|SIDT2_MOUSE	Sidt2	sp|Q8CIF6|SIDT2_MOUSE;sp|Q8CIF6-2|SIDT2_MOUSE	sp|Q8CIF6|SIDT2_MOUSE;sp|Q8CIF6-2|SIDT2_MOUSE	SID1 transmembrane family member 2 OS=Mus musculus OX=10090 GN=Sidt2 PE=1 SV=1;Isoform 2 of SID1 transmembrane family member 2 OS=Mus musculus OX=10090 GN=Sidt2	2	3	3.8	94.5	832	0.0006135	17.702	0//0	1//0	0//0	7400500	25	3			-1;-1	296020	296020	9656400	5.75178e+06	4.74905	0.00756957
sp|Q7TSH2|KPBB_MOUSE	Phkb	sp|Q7TSH2|KPBB_MOUSE	sp|Q7TSH2|KPBB_MOUSE	Phosphorylase b kinase regulatory subunit beta OS=Mus musculus OX=10090 GN=Phkb PE=1 SV=1	1	3	4.8	123.89	1085	0	22.984	0//0	1//0	0//0	15898000	54	7			-1	294400	294400	17461000	1.23558e+07	4.72306	0.00752815
sp|Q924Z5|TRAM2_MOUSE	Tram2	sp|Q924Z5|TRAM2_MOUSE	sp|Q924Z5|TRAM2_MOUSE	Translocating chain-associated membrane protein 2 OS=Mus musculus OX=10090 GN=Tram2 PE=1 SV=1	1	2	5.9	43.182	370	0.0021333	11.183	0//0	1//0	0//0	4707600	16	1			-1	294230	294230	6564200	3.65888e+06	4.72034	0.0075238
sp|Q8K0E8|FIBB_MOUSE	Fgb	sp|Q8K0E8|FIBB_MOUSE	sp|Q8K0E8|FIBB_MOUSE	Fibrinogen beta chain OS=Mus musculus OX=10090 GN=Fgb PE=1 SV=1	1	3	9.6	54.752	481	0	19.709	0//0	1//0	0//0	7619800	26	2			-1	293070	293070	10212000	5.9222e+06	4.70173	0.00749414
sp|Q9QYT7|PIGQ_MOUSE	Pigq	sp|Q9QYT7|PIGQ_MOUSE	sp|Q9QYT7|PIGQ_MOUSE	Phosphatidylinositol N-acetylglucosaminyltransferase subunit Q OS=Mus musculus OX=10090 GN=Pigq PE=1 SV=3	1	2	2.1	66.264	581	0.0011123	12.825	0//0	1//0	0//0	6463600	23	2			-1	281030	281030	8869100	5.02361e+06	4.50857	0.00718626
sp|Q7TT37|ELP1_MOUSE	Elp1	sp|Q7TT37|ELP1_MOUSE	sp|Q7TT37|ELP1_MOUSE	Elongator complex protein 1 OS=Mus musculus OX=10090 GN=Elp1 PE=1 SV=2	1	2	1.7	149.58	1333	0.0011601	14.37	0//0	1//0	0//0	15197000	55	3			-1	276310	276310	19184000	1.18114e+07	4.43285	0.00706556
sp|O35465|FKBP8_MOUSE	Fkbp8	sp|O35465|FKBP8_MOUSE;sp|O35465-2|FKBP8_MOUSE	sp|O35465|FKBP8_MOUSE;sp|O35465-2|FKBP8_MOUSE	Peptidyl-prolyl cis-trans isomerase FKBP8 OS=Mus musculus OX=10090 GN=Fkbp8 PE=1 SV=2;Isoform 2 of Peptidyl-prolyl cis-trans isomerase FKBP8 OS=Mus musculus OX=10090 GN=Fkbp8	2	2	8.2	43.528	402	0	18.64	0//0	1//0	1//0	5489200	20	2			-1;-1	274460	274460	7472400	4.26627e+06	4.40317	0.00701826
sp|Q91XA2|GOLM1_MOUSE	Golm1	sp|Q91XA2|GOLM1_MOUSE	sp|Q91XA2|GOLM1_MOUSE	Golgi membrane protein 1 OS=Mus musculus OX=10090 GN=Golm1 PE=1 SV=2	1	2	6.4	44.326	393	0.00060096	16.258	0//0	1//0	0//0	5749900	21	3			-1	273800	273800	8655100	4.46889e+06	4.39258	0.00700138
sp|Q5EG47|AAPK1_MOUSE	Prkaa1	sp|Q5EG47|AAPK1_MOUSE	sp|Q5EG47|AAPK1_MOUSE	5-AMP-activated protein kinase catalytic subunit alpha-1 OS=Mus musculus OX=10090 GN=Prkaa1 PE=1 SV=2	1	2	4.7	63.928	559	0.0026233	10.45	0//0	1//0	1//0	6739500	25	1			-1	269580	269580	10241000	5.23802e+06	4.32488	0.00689347
sp|Q6P4S8|INT1_MOUSE	Ints1	sp|Q6P4S8|INT1_MOUSE	sp|Q6P4S8|INT1_MOUSE	Integrator complex subunit 1 OS=Mus musculus OX=10090 GN=Ints1 PE=1 SV=2	1	4	2.5	245.16	2195	0	41.481	0//0	1//0	0//0	29354000	111	5			-1	264450	264450	34769000	1.96918e+07	4.24258	0.00676229
sp|Q9D786-2|HAUS5_MOUSE	Haus5	sp|Q9D786-2|HAUS5_MOUSE;sp|Q9D786|HAUS5_MOUSE	sp|Q9D786-2|HAUS5_MOUSE;sp|Q9D786|HAUS5_MOUSE	Isoform 2 of HAUS augmin-like complex subunit 5 OS=Mus musculus OX=10090 GN=Haus5;HAUS augmin-like complex subunit 5 OS=Mus musculus OX=10090 GN=Haus5 PE=1 SV=1	2	2	5.6	58.181	517	0.0011442	13.788	0//0	1//0	0//0	5412200	22	3			-1;-1	246010	246010	6247800	4.20643e+06	3.94674	0.00629076
sp|Q6P4T0|ATG2A_MOUSE	Atg2a	sp|Q6P4T0|ATG2A_MOUSE	sp|Q6P4T0|ATG2A_MOUSE	Autophagy-related protein 2 homolog A OS=Mus musculus OX=10090 GN=Atg2a PE=1 SV=2	1	3	3	210.94	1914	0	28.881	0//0	1//0	0//0	19159000	79	2			-1	242520	242520	21628000	1.48907e+07	3.89075	0.00620151
sp|Q925J9-3|MED1_MOUSE	Med1	sp|Q925J9-3|MED1_MOUSE;sp|Q925J9-2|MED1_MOUSE;sp|Q925J9-4|MED1_MOUSE;sp|Q925J9|MED1_MOUSE	sp|Q925J9-3|MED1_MOUSE;sp|Q925J9-2|MED1_MOUSE;sp|Q925J9-4|MED1_MOUSE;sp|Q925J9|MED1_MOUSE	Isoform 3 of Mediator of RNA polymerase II transcription subunit 1 OS=Mus musculus OX=10090 GN=Med1;Isoform 2 of Mediator of RNA polymerase II transcription subunit 1 OS=Mus musculus OX=10090 GN=Med1;Isoform 4 of Mediator of RNA polymerase II transcription	4	2	5.2	61.565	556	0.0021978	12.28	0//0	1//0	0//0	7962700	33	2			-1;-1;-1;-1	241290	241290	8815400	6.18863e+06	3.87102	0.00617006
sp|Q9R1C7-2|PR40A_MOUSE	Prpf40a	sp|Q9R1C7-2|PR40A_MOUSE;sp|Q9R1C7|PR40A_MOUSE	sp|Q9R1C7-2|PR40A_MOUSE;sp|Q9R1C7|PR40A_MOUSE	Isoform 2 of Pre-mRNA-processing factor 40 homolog A OS=Mus musculus OX=10090 GN=Prpf40a;Pre-mRNA-processing factor 40 homolog A OS=Mus musculus OX=10090 GN=Prpf40a PE=1 SV=1	2	2	2.1	103.96	911	0.0031348	10.283	0//0	1//0	0//0	7841700	33	2			-1;-1	237630	237630	9916200	6.09467e+06	3.8123	0.00607647
sp|Q6ZQ88|KDM1A_MOUSE	Kdm1a	sp|Q6ZQ88|KDM1A_MOUSE	sp|Q6ZQ88|KDM1A_MOUSE	Lysine-specific histone demethylase 1A OS=Mus musculus OX=10090 GN=Kdm1a PE=1 SV=2	1	2	3.6	92.849	853	0.0011891	15.541	0//0	1//0	0//0	8780100	37	2			-1	237300	237300	10843000	6.82392e+06	3.80701	0.00606803
sp|Q78PY7|SND1_MOUSE	Snd1	sp|Q78PY7|SND1_MOUSE	sp|Q78PY7|SND1_MOUSE	Staphylococcal nuclease domain-containing protein 1 OS=Mus musculus OX=10090 GN=Snd1 PE=1 SV=1	1	2	4.4	102.09	910	0.002122	10.868	0//0	1//0	0//0	11648000	50	2			-1	232960	232960	16244000	9.05289e+06	3.73738	0.00595705
sp|Q63836|SBP2_MOUSE	Selenbp2	sp|Q63836|SBP2_MOUSE;sp|P17563|SBP1_MOUSE	sp|Q63836|SBP2_MOUSE;sp|P17563|SBP1_MOUSE	Selenium-binding protein 2 OS=Mus musculus OX=10090 GN=Selenbp2 PE=1 SV=2;Methanethiol oxidase OS=Mus musculus OX=10090 GN=Selenbp1 PE=1 SV=2	2	2	4.2	52.609	472	0.0026219	10.427	0//0	1//0	0//0	7117600	31	0			-1;-1	229600	229600	9711700	5.53189e+06	3.68348	0.00587113
sp|Q80VI1|TRI56_MOUSE	Trim56	sp|Q80VI1|TRI56_MOUSE	sp|Q80VI1|TRI56_MOUSE	E3 ubiquitin-protein ligase TRIM56 OS=Mus musculus OX=10090 GN=Trim56 PE=1 SV=1	1	4	8.3	79.512	734	0	25.656	0//0	1//0	0//0	8948400	39	6			-1	229450	229450	10981000	6.95481e+06	3.68107	0.0058673
sp|Q9JMA1|UBP14_MOUSE	Usp14	sp|Q9JMA1|UBP14_MOUSE	sp|Q9JMA1|UBP14_MOUSE	Ubiquitin carboxyl-terminal hydrolase 14 OS=Mus musculus OX=10090 GN=Usp14 PE=1 SV=3	1	2	5.9	56.001	493	0.0011737	14.921	0//0	1//0	0//0	5692800	25	2			-1	227710	227710	6670600	4.42451e+06	3.65316	0.00582281
sp|Q8CAS9|PARP9_MOUSE	Parp9	sp|Q8CAS9|PARP9_MOUSE;sp|Q8CAS9-2|PARP9_MOUSE;sp|Q8CAS9-3|PARP9_MOUSE	sp|Q8CAS9|PARP9_MOUSE;sp|Q8CAS9-2|PARP9_MOUSE;sp|Q8CAS9-3|PARP9_MOUSE	Protein mono-ADP-ribosyltransferase PARP9 OS=Mus musculus OX=10090 GN=Parp9 PE=1 SV=2;Isoform 2 of Protein mono-ADP-ribosyltransferase PARP9 OS=Mus musculus OX=10090 GN=Parp9;Isoform 3 of Protein mono-ADP-ribosyltransferase PARP9 OS=Mus musculus OX=10090 G	3	4	5.7	96.658	866	0	27.912	0//0	1//0	1//0	10007000	45	6			-1;-1;-1	222370	222370	11231000	7.77749e+06	3.56749	0.00568626
sp|Q8BMA6|SRP68_MOUSE	Srp68	sp|Q8BMA6|SRP68_MOUSE	sp|Q8BMA6|SRP68_MOUSE	Signal recognition particle subunit SRP68 OS=Mus musculus OX=10090 GN=Srp68 PE=1 SV=2	1	2	5.3	70.573	625	0.0011514	14.082	0//0	1//0	0//0	7953700	36	2			-1	220940	220940	9160600	6.18171e+06	3.54454	0.00564969
sp|Q9QXK3-4|COPG2_MOUSE	Copg2	sp|Q9QXK3-4|COPG2_MOUSE;sp|Q9QXK3|COPG2_MOUSE;sp|Q9QXK3-3|COPG2_MOUSE;sp|Q9QZE5|COPG1_MOUSE	sp|Q9QXK3-4|COPG2_MOUSE;sp|Q9QXK3|COPG2_MOUSE;sp|Q9QXK3-3|COPG2_MOUSE;sp|Q9QZE5|COPG1_MOUSE	Isoform 4 of Coatomer subunit gamma-2 OS=Mus musculus OX=10090 GN=Copg2;Coatomer subunit gamma-2 OS=Mus musculus OX=10090 GN=Copg2 PE=1 SV=1;Isoform 3 of Coatomer subunit gamma-2 OS=Mus musculus OX=10090 GN=Copg2;Coatomer subunit gamma-1 OS=Mus musculus OX	4	2	2.9	97.55	870	0.0011117	12.716	0//0	1//0	0//0	9898800	46	4			-1;-1;-1;-1	215190	215190	12431000	7.69347e+06	3.4523	0.00550265
sp|Q6P5B0|RRP12_MOUSE	Rrp12	sp|Q6P5B0|RRP12_MOUSE	sp|Q6P5B0|RRP12_MOUSE	RRP12-like protein OS=Mus musculus OX=10090 GN=Rrp12 PE=1 SV=1	1	2	1.9	143.13	1295	0.0021265	10.932	0//0	1//0	0//0	14536000	68	2			-1	213760	213760	18594000	1.12975e+07	3.42936	0.00546609
sp|Q3TAP4|AP5B1_MOUSE	Ap5b1	sp|Q3TAP4|AP5B1_MOUSE	sp|Q3TAP4|AP5B1_MOUSE	AP-5 complex subunit beta-1 OS=Mus musculus OX=10090 GN=Ap5b1 PE=1 SV=1	1	2	3.2	94.678	876	0.0021751	11.885	0//0	1//0	0//0	7223100	34	3			-1	212440	212440	9341600	5.61387e+06	3.40818	0.00543233
sp|Q3U319|BRE1B_MOUSE	Rnf40	sp|Q3U319|BRE1B_MOUSE	sp|Q3U319|BRE1B_MOUSE	E3 ubiquitin-protein ligase BRE1B OS=Mus musculus OX=10090 GN=Rnf40 PE=1 SV=2	1	3	3.2	113.97	1001	0	19.882	0//0	1//0	0//0	11130000	53	3			-1	210000	210000	13019000	8.65037e+06	3.36903	0.00536994
sp|Q8R480|NUP85_MOUSE	Nup85	sp|Q8R480|NUP85_MOUSE	sp|Q8R480|NUP85_MOUSE	Nuclear pore complex protein Nup85 OS=Mus musculus OX=10090 GN=Nup85 PE=1 SV=1	1	2	3.5	74.775	656	0.0011919	15.773	0//0	1//0	0//0	6067500	29	2			-1	209220	209220	6900000	4.71574e+06	3.35652	0.00534999
sp|Q9DBG7|SRPRA_MOUSE	Srpra	sp|Q9DBG7|SRPRA_MOUSE	sp|Q9DBG7|SRPRA_MOUSE	Signal recognition particle receptor subunit alpha OS=Mus musculus OX=10090 GN=Srpra PE=1 SV=1	1	2	5.5	69.622	636	0.0021775	11.939	0//0	1//0	0//0	6791000	33	2			-1	205790	205790	8595500	5.27809e+06	3.30149	0.00526229
sp|P41216|ACSL1_MOUSE	Acsl1	sp|P41216|ACSL1_MOUSE	sp|P41216|ACSL1_MOUSE	Long-chain-fatty-acid--CoA ligase 1 OS=Mus musculus OX=10090 GN=Acsl1 PE=1 SV=2	1	2	5	77.951	699	0.002154	11.614	0//0	1//0	0//0	7561500	37	1			-1	204360	204360	11612000	5.87689e+06	3.27855	0.00522572
sp|Q8C0G2|T3JAM_MOUSE	Traf3ip3	sp|Q8C0G2|T3JAM_MOUSE	sp|Q8C0G2|T3JAM_MOUSE	TRAF3-interacting JNK-activating modulator OS=Mus musculus OX=10090 GN=Traf3ip3 PE=1 SV=2	1	2	4.7	58.563	513	0.0011703	14.709	0//0	1//0	0//0	6229900	31	1			-1	200970	200970	7836900	4.84196e+06	3.22417	0.00513903
sp|Q62261-2|SPTB2_MOUSE	Sptbn1	sp|Q62261-2|SPTB2_MOUSE;sp|Q62261|SPTB2_MOUSE	sp|Q62261-2|SPTB2_MOUSE;sp|Q62261|SPTB2_MOUSE	Isoform 2 of Spectrin beta chain, non-erythrocytic 1 OS=Mus musculus OX=10090 GN=Sptbn1;Spectrin beta chain, non-erythrocytic 1 OS=Mus musculus OX=10090 GN=Sptbn1 PE=1 SV=2	2	3	2.8	251.15	2154	0.0011876	15.501	0//0	1//0	0//1	24621000	128	3			-1;-1	192350	192350	32629000	1.91357e+07	3.08587	0.00491861
sp|Q8BW41-2|PMGT2_MOUSE	Pomgnt2	sp|Q8BW41-2|PMGT2_MOUSE;sp|Q8BW41|PMGT2_MOUSE	sp|Q8BW41-2|PMGT2_MOUSE;sp|Q8BW41|PMGT2_MOUSE	Isoform 2 of Protein O-linked-mannose beta-1,4-N-acetylglucosaminyltransferase 2 OS=Mus musculus OX=10090 GN=Pomgnt2;Protein O-linked-mannose beta-1,4-N-acetylglucosaminyltransferase 2 OS=Mus musculus OX=10090 GN=Pomgnt2 PE=1 SV=1	2	2	3.6	66.66	580	0.0011338	13.435	0//0	1//0	0//0	4763300	25	3			-1;-1	190530	190530	5127900	3.70203e+06	3.05668	0.00487207
sp|Q9JK53|PRELP_MOUSE	Prelp	sp|Q9JK53|PRELP_MOUSE	sp|Q9JK53|PRELP_MOUSE	Prolargin OS=Mus musculus OX=10090 GN=Prelp PE=1 SV=2	1	2	7.9	43.292	378	0.0011261	13.016	0//0	1//0	0//0	4562000	24	2			-1	190080	190080	5477200	3.54557e+06	3.04946	0.00486056
sp|Q8CHT3|INT5_MOUSE	Ints5	sp|Q8CHT3|INT5_MOUSE	sp|Q8CHT3|INT5_MOUSE	Integrator complex subunit 5 OS=Mus musculus OX=10090 GN=Ints5 PE=2 SV=1	1	2	3.5	108.35	1018	0.0011574	14.306	0//0	1//0	0//0	6519500	35	4			-1	186270	186270	9413300	5.06704e+06	2.98833	0.00476314
sp|Q8BY35|FGD2_MOUSE	Fgd2	sp|Q8BY35|FGD2_MOUSE;sp|Q91ZT5-4|FGD4_MOUSE;sp|Q91ZT5-3|FGD4_MOUSE	sp|Q8BY35|FGD2_MOUSE;sp|Q91ZT5-4|FGD4_MOUSE;sp|Q91ZT5-3|FGD4_MOUSE	FYVE, RhoGEF and PH domain-containing protein 2 OS=Mus musculus OX=10090 GN=Fgd2 PE=1 SV=1;Isoform 4 of FYVE, RhoGEF and PH domain-containing protein 4 OS=Mus musculus OX=10090 GN=Fgd4;Isoform 3 of FYVE, RhoGEF and PH domain-containing protein 4 OS=Mus mus	3	2	3.2	74.633	655	0.0011287	13.104	0//0	1//0	0//0	7259700	39	2			-1;-1;-1	186150	186150	10085000	5.64227e+06	2.98641	0.00476007
sp|Q5DTM8|BRE1A_MOUSE	Rnf20	sp|Q5DTM8|BRE1A_MOUSE;sp|Q5DTM8-2|BRE1A_MOUSE	sp|Q5DTM8|BRE1A_MOUSE;sp|Q5DTM8-2|BRE1A_MOUSE	E3 ubiquitin-protein ligase BRE1A OS=Mus musculus OX=10090 GN=Rnf20 PE=1 SV=2;Isoform 2 of E3 ubiquitin-protein ligase BRE1A OS=Mus musculus OX=10090 GN=Rnf20	2	4	6	113.52	973	0	25.854	0//0	1//0	0//0	9623900	54	2			-1;-1	178220	178220	12110000	7.47985e+06	2.85919	0.00455729
sp|Q6PNC0|DMXL1_MOUSE	Dmxl1	sp|Q6PNC0|DMXL1_MOUSE	sp|Q6PNC0|DMXL1_MOUSE	DmX-like protein 1 OS=Mus musculus OX=10090 GN=Dmxl1 PE=1 SV=1	1	4	2.4	336	3013	0	24.363	0//0	1//0	0//0	23011000	130	5			-1	177010	177010	27488000	1.6894e+07	2.83977	0.00452635
sp|Q8CFQ3|AQR_MOUSE	Aqr	sp|Q8CFQ3|AQR_MOUSE	sp|Q8CFQ3|AQR_MOUSE	RNA helicase aquarius OS=Mus musculus OX=10090 GN=Aqr PE=1 SV=2	1	3	4.6	170.29	1481	0	19.255	0//0	1//0	0//0	11142000	63	2			-1	176850	176850	12571000	8.65954e+06	2.83721	0.00452226
sp|Q8CH72|TRI32_MOUSE	Trim32	sp|Q8CH72|TRI32_MOUSE	sp|Q8CH72|TRI32_MOUSE	E3 ubiquitin-protein ligase TRIM32 OS=Mus musculus OX=10090 GN=Trim32 PE=1 SV=2	1	3	5.8	72.057	655	0	20.965	0//0	1//0	0//0	6184900	36	4			-1	171800	171800	7250200	4.80699e+06	2.75619	0.00439312
sp|Q3UBZ5|MI4GD_MOUSE	Mif4gd	sp|Q3UBZ5|MI4GD_MOUSE;sp|Q3UBZ5-2|MI4GD_MOUSE	sp|Q3UBZ5|MI4GD_MOUSE;sp|Q3UBZ5-2|MI4GD_MOUSE	MIF4G domain-containing protein OS=Mus musculus OX=10090 GN=Mif4gd PE=1 SV=1;Isoform 2 of MIF4G domain-containing protein OS=Mus musculus OX=10090 GN=Mif4gd	2	2	9.5	25.493	222	0.0011217	12.961	0//0	1//0	0//0	2397500	14	1			-1;-1	171250	171250	3703100	1.86341e+06	2.74737	0.00437906
sp|Q6P5F6|S39AA_MOUSE	Slc39a10	sp|Q6P5F6|S39AA_MOUSE	sp|Q6P5F6|S39AA_MOUSE	Zinc transporter ZIP10 OS=Mus musculus OX=10090 GN=Slc39a10 PE=1 SV=1	1	2	2.3	94.393	833	0.0021299	11.105	0//0	1//0	0//0	4745500	29	3			-1	163640	163640	5338900	3.68818e+06	2.62528	0.00418446
sp|A2AN08-3|UBR4_MOUSE	Ubr4	sp|A2AN08-3|UBR4_MOUSE;sp|A2AN08|UBR4_MOUSE;sp|A2AN08-5|UBR4_MOUSE;sp|A2AN08-2|UBR4_MOUSE	sp|A2AN08-3|UBR4_MOUSE;sp|A2AN08|UBR4_MOUSE;sp|A2AN08-5|UBR4_MOUSE;sp|A2AN08-2|UBR4_MOUSE	Isoform 3 of E3 ubiquitin-protein ligase UBR4 OS=Mus musculus OX=10090 GN=Ubr4;E3 ubiquitin-protein ligase UBR4 OS=Mus musculus OX=10090 GN=Ubr4 PE=1 SV=1;Isoform 5 of E3 ubiquitin-protein ligase UBR4 OS=Mus musculus OX=10090 GN=Ubr4;Isoform 2 of E3 ubiqui	4	8	3	570.29	5156	0	53.438	0//0	1//0	0//0	36352000	230	10			-1;-1;-1;-1	158050	158050	47967000	2.41913e+07	2.5356	0.00404152
sp|Q6Q899-2|DDX58_MOUSE	Ddx58	sp|Q6Q899-2|DDX58_MOUSE;sp|Q6Q899|DDX58_MOUSE	sp|Q6Q899-2|DDX58_MOUSE;sp|Q6Q899|DDX58_MOUSE	Isoform 2 of Antiviral innate immune response receptor RIG-I OS=Mus musculus OX=10090 GN=Ddx58;Antiviral innate immune response receptor RIG-I OS=Mus musculus OX=10090 GN=Ddx58 PE=1 SV=2	2	2	6.1	54.657	472	0.0021834	12.077	0//0	1//0	1//0	4305300	28	1			-1;-1	153760	153760	5110300	3.34613e+06	2.46677	0.00393182
sp|Q80VH0|BANK1_MOUSE	Bank1	sp|Q80VH0|BANK1_MOUSE	sp|Q80VH0|BANK1_MOUSE	B-cell scaffold protein with ankyrin repeats OS=Mus musculus OX=10090 GN=Bank1 PE=1 SV=3	1	2	3.2	89.405	783	0	29.283	0//0	1//0	0//0	5311600	36	4			-1	147540	147540	6868000	4.12832e+06	2.36699	0.00377277
sp|Q9JJI6|PIGO_MOUSE	Pigo	sp|Q9JJI6|PIGO_MOUSE	sp|Q9JJI6|PIGO_MOUSE	GPI ethanolamine phosphate transferase 3 OS=Mus musculus OX=10090 GN=Pigo PE=1 SV=2	1	2	3.1	119.16	1093	0.0021322	11.155	0//0	1//0	0//0	5038600	37	1			-1	136180	136180	6232000	3.91609e+06	2.18474	0.00348228
sp|Q9WTR1|TRPV2_MOUSE	Trpv2	sp|Q9WTR1|TRPV2_MOUSE	sp|Q9WTR1|TRPV2_MOUSE	Transient receptor potential cation channel subfamily V member 2 OS=Mus musculus OX=10090 GN=Trpv2 PE=1 SV=2	1	2	4.1	85.964	756	0.0021311	11.106	0//0	1//0	0//0	3803100	30	2			-1	126770	126770	5124300	2.95582e+06	2.03377	0.00324165
sp|E9Q414|APOB_MOUSE	Apob	sp|E9Q414|APOB_MOUSE	sp|E9Q414|APOB_MOUSE	Apolipoprotein B-100 OS=Mus musculus OX=10090 GN=Apob PE=1 SV=1	1	5	1.4	509.43	4505	0	31.821	0//0	1//0	0//0	25052000	223	7			-1	112340	112340	32736000	1.43819e+07	1.80227	0.00287266
sp|Q80XB4-3|NRAP_MOUSE	Nrap	sp|Q80XB4-3|NRAP_MOUSE;sp|Q80XB4-4|NRAP_MOUSE;sp|Q80XB4-2|NRAP_MOUSE;sp|Q80XB4|NRAP_MOUSE	sp|Q80XB4-3|NRAP_MOUSE;sp|Q80XB4-4|NRAP_MOUSE;sp|Q80XB4-2|NRAP_MOUSE;sp|Q80XB4|NRAP_MOUSE	Isoform 3 of Nebulin-related-anchoring protein OS=Mus musculus OX=10090 GN=Nrap;Isoform 4 of Nebulin-related-anchoring protein OS=Mus musculus OX=10090 GN=Nrap;Isoform 2 of Nebulin-related-anchoring protein OS=Mus musculus OX=10090 GN=Nrap;Nebulin-related-	4	2	2.4	167.52	1485	0.0031299	10.194	0//0	1//0	0//0	11324000	102	1			-1;-1;-1;-1	111020	111020	13375000	8.80126e+06	1.7811	0.00283891
sp|Q99MN9|PCCB_MOUSE	Pccb	sp|Q99MN9|PCCB_MOUSE	sp|Q99MN9|PCCB_MOUSE	Propionyl-CoA carboxylase beta chain, mitochondrial OS=Mus musculus OX=10090 GN=Pccb PE=1 SV=2	1	2	5.4	58.408	541	0.0021822	12.068	0//0	1//0	0//0	3030700	29	2			-1	104510	104510	4561900	2.3555e+06	1.67666	0.00267244
sp|P61222|ABCE1_MOUSE	Abce1	sp|P61222|ABCE1_MOUSE	sp|P61222|ABCE1_MOUSE	ATP-binding cassette sub-family E member 1 OS=Mus musculus OX=10090 GN=Abce1 PE=1 SV=1	1	2	8.3	67.314	599	0.0026261	10.47	0//0	1//0	1//0	2930200	29	2			-1	101040	101040	4566500	2.27739e+06	1.62099	0.00258371
sp|Q8BIG7|CMTD1_MOUSE	Comtd1	sp|Q8BIG7|CMTD1_MOUSE	sp|Q8BIG7|CMTD1_MOUSE	Catechol O-methyltransferase domain-containing protein 1 OS=Mus musculus OX=10090 GN=Comtd1 PE=1 SV=1	1	2	9.5	28.96	262	0.0011655	14.522	0//0	1//0	0//0	1303900	14	1			-1	93137	93137	2032100	1.01341e+06	1.4942	0.00238162
sp|A6H5Z3-2|EXC6B_MOUSE	Exoc6b	sp|A6H5Z3-2|EXC6B_MOUSE;sp|A6H5Z3|EXC6B_MOUSE	sp|A6H5Z3-2|EXC6B_MOUSE;sp|A6H5Z3|EXC6B_MOUSE	Isoform 2 of Exocyst complex component 6B OS=Mus musculus OX=10090 GN=Exoc6b;Exocyst complex component 6B OS=Mus musculus OX=10090 GN=Exoc6b PE=1 SV=1	2	2	5.5	78.802	678	0.0021243	10.879	0//0	1//0	0//0	3309200	38	2			-1;-1	87083	87083	3830800	2.57194e+06	1.39707	0.00222681
sp|Q61879|MYH10_MOUSE	Myh10	sp|Q61879|MYH10_MOUSE;sp|P13542|MYH8_MOUSE;sp|Q28641|MYH4_RABIT;CON__sp|Q28641|MYH4_RABIT;sp|Q5SX39|MYH4_MOUSE;sp|P13541|MYH3_MOUSE;sp|A2AQP0|MYH7B_MOUSE;sp|Q5SX40|MYH1_MOUSE	sp|Q61879|MYH10_MOUSE	Myosin-10 OS=Mus musculus OX=10090 GN=Myh10 PE=1 SV=2	8	4	12.5	228.99	1976	0	32.339	0//1	1//0	0//1	8702700	100	5			-1;-1;-1;-1;-1;-1;-1;-1	87027	87027	11182000	6.76389e+06	1.39618	0.00222538
sp|Q61216|MRE11_MOUSE	Mre11	sp|Q61216|MRE11_MOUSE;sp|Q61216-2|MRE11_MOUSE	sp|Q61216|MRE11_MOUSE;sp|Q61216-2|MRE11_MOUSE	Double-strand break repair protein MRE11 OS=Mus musculus OX=10090 GN=Mre11 PE=1 SV=1;Isoform 2 of Double-strand break repair protein MRE11 OS=Mus musculus OX=10090 GN=Mre11	2	3	5.1	80.222	706	0	19.005	0//0	1//0	1//0	2573200	33	4			-1;-1	77977	77977	3873400	1.99992e+06	1.25099	0.00199396
sp|Q62452|UD19_MOUSE	Ugt1a9	sp|Q62452|UD19_MOUSE;sp|Q6ZQM8|UD17_MOUSE;sp|Q64435|UD16_MOUSE;sp|P70691|UD12_MOUSE;sp|Q63886|UD11_MOUSE	sp|Q62452|UD19_MOUSE;sp|Q6ZQM8|UD17_MOUSE;sp|Q64435|UD16_MOUSE;sp|P70691|UD12_MOUSE;sp|Q63886|UD11_MOUSE	UDP-glucuronosyltransferase 1A9 OS=Mus musculus OX=10090 GN=Ugt1a9 PE=1 SV=3;UDP-glucuronosyltransferase 1A7 OS=Mus musculus OX=10090 GN=Ugt1a7 PE=1 SV=1;UDP-glucuronosyltransferase 1-6 OS=Mus musculus OX=10090 GN=Ugt1a6 PE=1 SV=1;UDP-glucuronosyltransfera	5	2	5.5	60.007	528	0	36.814	0//0	1//0	0//0	1829800	24	2			-1;-1;-1;-1;-1	76240	76240	1829800	1.42214e+06	1.22312	0.00194954
sp|Q8BUR4-2|DOCK1_MOUSE	Dock1	sp|Q8BUR4-2|DOCK1_MOUSE;sp|Q8BUR4|DOCK1_MOUSE	sp|Q8BUR4-2|DOCK1_MOUSE;sp|Q8BUR4|DOCK1_MOUSE	Isoform 2 of Dedicator of cytokinesis protein 1 OS=Mus musculus OX=10090 GN=Dock1;Dedicator of cytokinesis protein 1 OS=Mus musculus OX=10090 GN=Dock1 PE=1 SV=3	2	2	2.1	182.63	1572	0.0011547	14.159	0//0	1//0	0//0	6459800	88	4			-1;-1	73407	73407	8741900	5.02071e+06	1.17767	0.0018771
sp|Q8K224|NAT10_MOUSE	Nat10	sp|Q8K224|NAT10_MOUSE	sp|Q8K224|NAT10_MOUSE	RNA cytidine acetyltransferase OS=Mus musculus OX=10090 GN=Nat10 PE=1 SV=1	1	2	2.8	115.42	1024	0.0022014	12.33	0//0	1//0	0//0	3959500	55	1			-1	71990	71990	4987300	3.07737e+06	1.15494	0.00184087
sp|E9Q4N7|ARI1B_MOUSE	Arid1b	sp|E9Q4N7|ARI1B_MOUSE	sp|E9Q4N7|ARI1B_MOUSE	AT-rich interactive domain-containing protein 1B OS=Mus musculus OX=10090 GN=Arid1b PE=1 SV=1	1	2	1.2	237.79	2244	0.0031332	10.23	1//0	1//0	0//0	4529500	64	2			-1	70774	70774	6818100	3.52038e+06	1.13543	0.00180977
sp|Q9Z110-2|P5CS_MOUSE	Aldh18a1	sp|Q9Z110-2|P5CS_MOUSE;sp|Q9Z110|P5CS_MOUSE	sp|Q9Z110-2|P5CS_MOUSE;sp|Q9Z110|P5CS_MOUSE	Isoform Short of Delta-1-pyrroline-5-carboxylate synthase OS=Mus musculus OX=10090 GN=Aldh18a1;Delta-1-pyrroline-5-carboxylate synthase OS=Mus musculus OX=10090 GN=Aldh18a1 PE=1 SV=2	2	2	2.3	87.052	793	0.0021692	11.849	0//0	1//0	0//0	3137500	46	2			-1;-1	68206	68206	4806800	2.4385e+06	1.09423	0.00174411
sp|Q8CD92-2|TTC27_MOUSE	Ttc27	sp|Q8CD92-2|TTC27_MOUSE;sp|Q8CD92|TTC27_MOUSE	sp|Q8CD92-2|TTC27_MOUSE;sp|Q8CD92|TTC27_MOUSE	Isoform 2 of Tetratricopeptide repeat protein 27 OS=Mus musculus OX=10090 GN=Ttc27;Tetratricopeptide repeat protein 27 OS=Mus musculus OX=10090 GN=Ttc27 PE=1 SV=2	2	2	3.9	96.301	846	0.00060386	16.634	0//0	1//0	0//0	2616900	39	2			-1;-1	67101	67101	2895200	2.03388e+06	1.0765	0.00171585
sp|Q80TL7-2|MON2_MOUSE	Mon2	sp|Q80TL7-2|MON2_MOUSE;sp|Q80TL7|MON2_MOUSE	sp|Q80TL7-2|MON2_MOUSE;sp|Q80TL7|MON2_MOUSE	Isoform 2 of Protein MON2 homolog OS=Mus musculus OX=10090 GN=Mon2;Protein MON2 homolog OS=Mus musculus OX=10090 GN=Mon2 PE=1 SV=2	2	2	1.4	188.28	1708	0.0011173	12.901	0//0	1//0	0//0	5022700	78	2			-1;-1	64394	64394	6574400	3.90375e+06	1.03307	0.00164663
sp|Q9QXZ0-3|MACF1_MOUSE	Macf1	sp|Q9QXZ0-3|MACF1_MOUSE;sp|Q9QXZ0-2|MACF1_MOUSE;sp|Q9QXZ0-4|MACF1_MOUSE;sp|Q9QXZ0|MACF1_MOUSE	sp|Q9QXZ0-3|MACF1_MOUSE;sp|Q9QXZ0-2|MACF1_MOUSE;sp|Q9QXZ0-4|MACF1_MOUSE;sp|Q9QXZ0|MACF1_MOUSE	Isoform 3 of Microtubule-actin cross-linking factor 1 OS=Mus musculus OX=10090 GN=Macf1;Isoform 2 of Microtubule-actin cross-linking factor 1 OS=Mus musculus OX=10090 GN=Macf1;Isoform 4 of Microtubule-actin cross-linking factor 1 OS=Mus musculus OX=10090 G	4	2	0.5	601.74	5270	0.0011461	13.853	0//0	1//0	0//0	11382000	303	1			-1;-1;-1;-1	37564	37564	14168000	8.84611e+06	0.60264	0.000960554
																									62738.8
